# Supplementary material for: Transcriptome-Wide Analysis of RNA m6A Methylation and Gene Expression Changes Among Two Arabidopsis Ecotypes and Their Reciprocal Hybrids
Source: Frontiers journal article supplement (doi:10.3389/fpls.2021.685189), 2021-06-10
Supplement: Data_Sheet_1.ZIP [file Readme.pdf › Readme.pdf]

## Scripts used in study

script 1: calculate\_tx\_cov.py .....  
script 2: get\_reads\_at\_each\_base\_of\_peaks.py .....  
script 3: get\_peak\_summit.py .....  
script 4: assign\_peak\_to\_utr\_or\_cds.py .....  
script 5: get\_reads\_in\_peak\_region.py .....  
script 6: get\_reads\_of\_alleles\_by\_informative\_snps.py.....

---

## calculate\_tx\_cov.py

---

Description:

Calculate the reads along transcripts.

Usage:

```
python calculate_tx_cov.py -i <in.bam> -r <utr_cds_location_file> -n <n1,n2,n3> -o <output>
```

Arguments and options:

- i <string>, bam file of unique mapped reads sorted by position.
- r <string>, the file contains UTR and CDS location information.
- n <int>, bins for 5' UTR, CDS and 3' UTR.
- o <output>, output file.

The format of utr and cds location file is as below:

| Chrom | Gene      | Start | End   | Strand | 5' UTR                       | CDS          | 3' UTR       |
|-------|-----------|-------|-------|--------|------------------------------|--------------|--------------|
| Chr1  | AT1G01030 | 11649 | 13714 | -      | 12941,13173,<br>13335,13714, | 11864,12940, | 11649,11863, |

---

## get\_reads\_in\_peak\_region.py

---

Description:

Calculate reads covered each peak region.

Usage:

```
python get_reads_in_peak_region.py <peak_region> <bam> <mapped_reads> <output>
```

Arguments:

<bam> is position sorted bam file.

<mapped\_reads> is the number of unique reads mapped to the reference.

The format of peak region file:

| Chrom | Peak        | Start  | End    |
|-------|-------------|--------|--------|
| Chr1  | AT1G01140_1 | 64264  | 13714  |
| Chr1  | AT1G01430_1 | 158277 | 158426 |

---

## get\_reads\_at\_each\_base\_of\_peaks.py

---

Description

Calculate the number of reads at each base of peak region.

Usage:

```
python get_reads_on_each_base_of_peaks.py <peak_region> <bam> <mapping_reads>
```

<output>

\*the description of file format is the same as above.

---

## get\_peak\_summit.py

---

### Description:

Identify peak summit by subtracting IP reads from input reads.

### Usage:

```
python get_peak_summit.py <peak_region> <input1_reads> <input2_reads> <ip1_reads>
<ip2_reads> <output>
```

### Arguments:

<peak\_region>, the format is as above.

<input1\_reads>, <input2\_reads>, <ip1\_reads>, <ip2\_reads> are output files of get\_reads\_on\_each\_base\_of\_peaks.py, which have the number of reads covered at each base of peak region.

---

## assign\_peak\_to\_utr\_or\_cds.py

---

### Description

Assign peak to utr or cds region according to its summit.

### Usage:

```
python assign_peak_to_utr_or_cds.py <peak_summit> <utr_cds_location_file> <output1>
<output2>
```

### Arguments:

<peak\_summit>, output file of get\_peak\_summit.py.

<utr\_cds\_location\_file>, the file contains UTR and CDS location information. Described above.

<output1>, the number of peaks assigned to UTR or CDS.

<output2>, the details of annotation of each peak.

---

## get\_reads\_of\_alleles\_by\_informative\_snps.py

---

### Description:

Count reads on allelic transcripts or peaks by SNPs.

### Usage:

```
python get_reads_of_alleles_by_informative_snps.py <peak_region> <snp_list> <bam1> <bam2>
<output>
```

### Arguments:

<peak\_region>, described as above.

<bam1, bam2>, bam file sorted by position.

<snp\_list>, the file contains SNPs that identified by comparing Col-0 and Ler reference genomes. It have four columns, each column represents chromosome, position, reference and SNP, respectively. For example, Chr1 105064 C T.
