# Supplementary material for: Transcriptome-Wide Analysis of RNA m6A Methylation and Gene Expression Changes Among Two Arabidopsis Ecotypes and Their Reciprocal Hybrids
Source: Front Plant Sci. 2021 Jun 10;12:685189. doi: 10.3389/fpls.2021.685189 (PMC8222996; doi:10.3389/fpls.2021.685189)
Supplement: Supplementary Table 1 — List of m6A peaks identified in all the samples. [file Table_1.XLSX]

## Sheet: Col-0
Chr	Start	End	Peak_ID	Block_sizes	Block_starts	Enrichment	Gene expression (FPKM)
Chr1	6836	7218	AT1G01020_1	233,62,	0,320,	10.1564	3.18336
Chr1	23867	24267	AT1G01040_1	400,	0,	5.95096	4.3508
Chr1	30593	31127	AT1G01040_2	223,226,	0,308,	3.2318	4.3508
Chr1	31266	31413	AT1G01050_1	147,	0,	5.95979	44.383
Chr1	45363	45561	AT1G01080_1	198,	0,	6.17699	43.9897
Chr1	46418	46517	AT1G01080_2	99,	0,	2.7753	43.9897
Chr1	46664	46763	AT1G01080_3	99,	0,	9.06889	43.9897
Chr1	47582	47733	AT1G01090_1	151,	0,	3.22101	95.973
Chr1	49004	49204	AT1G01090_2	200,	0,	2.80049	95.973
Chr1	50145	50336	AT1G01100_1	191,	0,	6.20985	250.128
Chr1	64263	64410	AT1G01140_1	147,	0,	8.74825	22.2772
Chr1	73715	74096	AT1G01160_1	25,275,	0,106,	8.18483	10.1912
Chr1	73977	74165	AT1G01170_1	188,	0,	5.82201	46.633
Chr1	89594	90207	AT1G01210_1	151,46,	0,567,	6.61239	7.22505
Chr1	95432	95681	AT1G01220_1	249,	0,	10.0582	8.12576
Chr1	99045	99191	AT1G01230_1	146,	0,	4.50514	16.287
Chr1	101443	101740	AT1G01240_1	297,	0,	3.18577	2.55475
Chr1	109879	109978	AT1G01260_1	99,	0,	1.69585	3.83657
Chr1	110420	110568	AT1G01260_2	148,	0,	2.88554	3.83657
Chr1	117126	117373	AT1G01300_1	247,	0,	3.27101	33.5294
Chr1	148365	148564	AT1G01390_1	199,	0,	3.91962	2.6722
Chr1	154589	154786	AT1G01420_1	197,	0,	2.63673	3.00444
Chr1	158276	158426	AT1G01430_1	150,	0,	2.21721	12.7749
Chr1	159875	159975	AT1G01440_1	100,	0,	8.57791	4.54987
Chr1	172797	172948	AT1G01470_1	151,	0,	3.82151	35.9194
Chr1	180165	180713	AT1G01490_1	548,	0,	6.01494	15.216
Chr1	189824	190124	AT1G01510_1	300,	0,	10.1042	9.56707
Chr1	198390	198639	AT1G01540_1	249,	0,	10.1522	28.4363
Chr1	222738	222984	AT1G01610_1	246,	0,	5.20019	25.1205
Chr1	232939	233238	AT1G01650_1	299,	0,	14.7443	10.7542
Chr1	251593	251825	AT1G01690_1	1,146,	0,86,	1.67814	1.87572
Chr1	265983	266227	AT1G01710_1	244,	0,	22.8299	10.7766
Chr1	269840	269987	AT1G01725_1	147,	0,	6.67633	3.66232
Chr1	271839	272089	AT1G01730_1	250,	0,	4.72289	9.49725
Chr1	281771	281872	AT1G01770_1	101,	0,	1.47567	5.14058
Chr1	282118	282891	AT1G01770_2	71,283,43,	0,365,730,	4.13564	5.14058
Chr1	283948	284196	AT1G01780_1	248,	0,	7.15878	4.48161
Chr1	290902	291103	AT1G01790_1	201,	0,	20.1087	48.7841
Chr1	296049	296195	AT1G01820_1	146,	0,	11.6136	28.2558
Chr1	298650	298950	AT1G01830_1	300,	0,	3.17261	6.64893
Chr1	304164	304358	AT1G01840_1	194,	0,	4.65505	2.03468
Chr1	304181	304330	AT1G01860_1	149,	0,	5.89265	4.53475
Chr1	313198	313593	AT1G01910_1	395,	0,	7.8083	16.9284
Chr1	319419	319618	AT1G01920_1	199,	0,	11.2257	4.62986
Chr1	319866	320446	AT1G01930_1	279,45,67,	0,385,513,	5.12982	4.43229
Chr1	324673	324868	AT1G01940_1	195,	0,	13.2065	8.41973
Chr1	328260	328511	AT1G01950_1	62,88,	0,163,	1.93667	4.67552
Chr1	330637	330837	AT1G01960_1	200,	0,	19.3047	16.2065
Chr1	339941	340039	AT1G01970_1	98,	0,	7.47919	19.2168
Chr1	343312	343412	AT1G01990_1	100,	0,	3.35668	8.0546
Chr1	343954	344104	AT1G01990_2	150,	0,	6.47976	8.0546
Chr1	352710	352858	AT1G02020_1	148,	0,	7.13019	6.35581
Chr1	354236	354533	AT1G02020_2	297,	0,	5.61672	6.35581
Chr1	354680	354779	AT1G02020_3	99,	0,	3.18979	6.35581
Chr1	386562	386763	AT1G02080_1	201,	0,	9.02048	11.1511
Chr1	387325	387701	AT1G02090_1	178,118,	0,258,	8.55345	12.0796
Chr1	392297	392816	AT1G02100_1	3,443,	0,76,	9.03803	11.4733
Chr1	393076	393471	AT1G02110_1	395,	0,	2.81148	9.13338
Chr1	395035	395184	AT1G02110_2	149,	0,	2.01024	9.13338
Chr1	395281	395528	AT1G02110_3	247,	0,	6.19515	9.13338
Chr1	399105	399903	AT1G02120_1	5,212,420,	0,76,378,	6.11546	26.4214
Chr1	400127	400369	AT1G02130_1	242,	0,	13.1112	16.3668
Chr1	403245	403391	AT1G02140_1	146,	0,	22.9949	67.4245
Chr1	408421	408619	AT1G02145_1	198,	0,	14.6275	6.29224
Chr1	410432	410532	AT1G02150_1	100,	0,	6.22241	55.3687
Chr1	411398	411585	AT1G02160_1	187,	0,	6.82433	15.8371
Chr1	411856	412244	AT1G02170_1	388,	0,	2.67454	13.3895
Chr1	413289	413554	AT1G02170_2	6,188,	0,77,	4.0965	13.3895
Chr1	413569	413716	AT1G02180_1	147,	0,	4.39767	4.47612
Chr1	440546	440845	AT1G02260_1	299,	0,	4.27351	5.69523
Chr1	443216	443513	AT1G02270_1	297,	0,	8.17784	7.44919
Chr1	445912	446148	AT1G02270_2	30,119,	0,117,	2.89065	7.44919
Chr1	448519	448617	AT1G02280_1	98,	0,	11.9834	38.7661
Chr1	450509	450657	AT1G02290_1	148,	0,	4.36651	3.12297
Chr1	455323	455470	AT1G02300_1	147,	0,	7.91277	5.41981
Chr1	457969	458067	AT1G02305_1	98,	0,	14.2647	38.1605
Chr1	462094	462294	AT1G02330_1	200,	0,	5.89175	11.2941
Chr1	462776	463124	AT1G02330_2	24,124,2,	0,99,346,	1.92935	11.2941
Chr1	463272	463519	AT1G02330_3	51,99,	0,148,	2.52333	11.2941
Chr1	492635	492930	AT1G02410_1	295,	0,	15.2132	7.47946
Chr1	498299	498395	AT1G02450_1	96,	0,	3.19469	7.02403
Chr1	513896	514117	AT1G02475_1	138,12,	0,209,	6.56141	30.5458
Chr1	515173	515273	AT1G02475_2	100,	0,	6.38456	30.5458
Chr1	520202	520301	AT1G02500_1	99,	0,	3.05619	114.801
Chr1	539781	540028	AT1G02560_1	247,	0,	10.3178	161.494
Chr1	581928	582215	AT1G02680_1	287,	0,	9.65352	6.22774
Chr1	592178	592476	AT1G02720_1	298,	0,	2.53198	3.38734
Chr1	599622	599898	AT1G02740_1	190,7,	0,269,	3.22795	2.68099
Chr1	604051	604291	AT1G02750_1	240,	0,	4.22103	4.17942
Chr1	607991	608088	AT1G02780_1	97,	0,	11.4717	442.145
Chr1	621598	621744	AT1G02816_1	146,	0,	1.51374	2.85639
Chr1	629596	629746	AT1G02840_1	150,	0,	18.8351	28.4305
Chr1	637313	637463	AT1G02870_1	150,	0,	7.58836	11.2983
Chr1	642853	643053	AT1G02880_1	200,	0,	10.8453	5.91426
Chr1	655616	655764	AT1G02910_1	148,	0,	18.6356	34.6074
Chr1	666954	667283	AT1G02960_1	114,133,	0,196,	11.0138	3.26492
Chr1	683967	684118	AT1G02990_2	151,	0,	2.91304	2.63333
Chr1	684416	684517	AT1G02990_3	101,	0,	6.11782	2.63333
Chr1	703535	703782	AT1G03030_1	247,	0,	8.90024	7.23639
Chr1	703944	704288	AT1G03040_1	344,	0,	6.69094	15.755
Chr1	706394	706542	AT1G03040_2	148,	0,	3.45581	15.755
Chr1	710066	710269	AT1G03055_1	70,29,	0,174,	9.74014	2.08652
Chr1	713989	714090	AT1G03060_2	101,	0,	2.37867	4.95385
Chr1	715879	715980	AT1G03060_3	101,	0,	1.47693	4.95385
Chr1	716878	716979	AT1G03060_4	101,	0,	1.50592	4.95385
Chr1	731752	732300	AT1G03080_1	548,	0,	4.4111	6.96762
Chr1	733330	733480	AT1G03080_2	150,	0,	1.5299	6.96762
Chr1	733877	733978	AT1G03080_3	101,	0,	1.95261	6.96762
Chr1	734723	734873	AT1G03080_4	150,	0,	2.34327	6.96762
Chr1	751680	751877	AT1G03110_1	197,	0,	4.2875	5.06565
Chr1	753975	754119	AT1G03130_1	144,	0,	5.02179	198.082
Chr1	755526	755770	AT1G03140_1	244,	0,	5.97343	13.5056
Chr1	758254	758535	AT1G03150_1	5,186,	0,95,	7.40837	7.36524
Chr1	761358	761507	AT1G03160_1	149,	0,	2.27749	26.8346
Chr1	765947	766145	AT1G03160_2	198,	0,	5.44477	26.8346
Chr1	784196	784296	AT1G03210_1	100,	0,	4.54353	14.116
Chr1	787179	787329	AT1G03220_1	150,	0,	4.116	16.055
Chr1	790065	790312	AT1G03230_1	247,	0,	5.81226	10.839
Chr1	793411	793655	AT1G03250_1	244,	0,	9.7606	10.2943
Chr1	795547	795747	AT1G03260_1	200,	0,	8.58782	4.71069
Chr1	806669	806967	AT1G03280_1	298,	0,	12.6947	10.8368
Chr1	809439	809949	AT1G03290_1	143,117,39,	0,232,471,	2.39176	7.49835
Chr1	810587	810836	AT1G03290_2	249,	0,	12.0881	7.49835
Chr1	816563	816663	AT1G03310_1	100,	0,	3.23288	26.5997
Chr1	818030	818224	AT1G03330_1	194,	0,	12.9148	17.8976
Chr1	823273	823521	AT1G03350_1	248,	0,	3.03977	16.4051
Chr1	828810	828910	AT1G03365_1	100,	0,	2.3926	3.69165
Chr1	829009	829945	AT1G03365_2	173,225,	0,711,	2.87385	3.69165
Chr1	830749	830899	AT1G03370_1	150,	0,	2.20646	8.37691
Chr1	834612	834762	AT1G03370_2	150,	0,	2.13555	8.37691
Chr1	834911	835012	AT1G03370_3	101,	0,	2.64854	8.37691
Chr1	835111	835311	AT1G03370_4	200,	0,	6.57693	8.37691
Chr1	840280	840975	AT1G03380_1	131,468,	0,227,	10.2302	6.10308
Chr1	842805	842953	AT1G03400_1	148,	0,	9.9099	18.5853
Chr1	846651	846848	AT1G03410_2	197,	0,	1.85335	10.7093
Chr1	849225	849473	AT1G03430_1	248,	0,	3.23542	9.08944
Chr1	852400	852600	AT1G03440_1	200,	0,	2.77044	6.9454
Chr1	853198	853349	AT1G03440_2	151,	0,	2.9043	6.9454
Chr1	866384	866629	AT1G03470_1	245,	0,	5.57315	2.51999
Chr1	869101	869301	AT1G03475_1	200,	0,	12.1608	150.796
Chr1	877910	878010	AT1G03520_1	100,	0,	4.76527	2.60504
Chr1	881472	881621	AT1G03530_3	149,	0,	3.06595	4.40513
Chr1	882311	882708	AT1G03530_4	397,	0,	7.85387	4.40513
Chr1	894336	894682	AT1G03590_1	346,	0,	3.756	4.19076
Chr1	898917	899064	AT1G03600_1	147,	0,	5.14992	167.885
Chr1	901175	901275	AT1G03610_1	100,	0,	3.22329	4.28015
Chr1	916914	917059	AT1G03680_1	145,	0,	8.26391	304.918
Chr1	920292	920542	AT1G03687_1	250,	0,	8.31155	5.6343
Chr1	930909	931203	AT1G03730_1	294,	0,	2.15913	3.50823
Chr1	936452	936603	AT1G03740_1	151,	0,	2.16061	5.09115
Chr1	941110	942032	AT1G03760_1	157,66,36,101,34,2,	0,255,426,583,804,920,	3.8777	3.58273
Chr1	942309	942409	AT1G03760_2	100,	0,	1.64836	3.58273
Chr1	947864	948062	AT1G03780_1	198,	0,	2.02457	2.76127
Chr1	948307	948639	AT1G03780_2	36,211,	0,121,	4.42992	2.76127
Chr1	960132	960329	AT1G03820_1	197,	0,	5.47358	6.25898
Chr1	979406	979557	AT1G03860_1	151,	0,	17.0143	28.0403
Chr1	983058	983399	AT1G03870_1	341,	0,	3.02833	17.4629
Chr1	997232	997776	AT1G03910_1	44,72,63,22,	0,185,371,522,	3.82835	15.2403
Chr1	1000179	1000429	AT1G03910_2	250,	0,	15.1752	15.2403
Chr1	1008024	1008271	AT1G03930_1	247,	0,	13.1616	12.4117
Chr1	1011247	1011511	AT1G03950_1	186,10,	0,254,	7.6377	8.58187
Chr1	1018701	1018950	AT1G03970_1	249,	0,	2.85637	11.6661
Chr1	1028728	1028827	AT1G04000_1	99,	0,	1.73002	6.29181
Chr1	1040013	1040113	AT1G04020_1	100,	0,	3.25679	5.03158
Chr1	1048616	1048948	AT1G04050_2	14,39,96,	0,103,236,	2.50933	1.17147
Chr1	1056476	1056777	AT1G04080_1	301,	0,	14.6213	18.6458
Chr1	1062527	1062627	AT1G04110_1	100,	0,	1.33157	3.41606
Chr1	1075174	1075568	AT1G04130_1	26,268,	0,126,	8.38417	5.04186
Chr1	1075592	1075991	AT1G04140_1	399,	0,	9.78284	21.3814
Chr1	1092398	1092804	AT1G04160_1	23,99,29,	0,173,377,	2.39346	2.15199
Chr1	1099653	1099852	AT1G04170_1	199,	0,	13.6883	36.0046
Chr1	1106500	1106647	AT1G04190_1	147,	0,	12.0446	13.0472
Chr1	1113859	1114007	AT1G04200_1	148,	0,	10.0311	5.53959
Chr1	1141068	1141218	AT1G04260_1	150,	0,	2.90532	4.23275
Chr1	1141751	1141849	AT1G04270_1	98,	0,	11.86	219.454
Chr1	1144116	1144472	AT1G04280_2	8,239,	0,117,	3.02018	2.96252
Chr1	1147641	1147740	AT1G04290_1	99,	0,	5.55288	9.94934
Chr1	1148763	1148864	AT1G04300_1	101,	0,	4.73802	7.7629
Chr1	1149413	1149663	AT1G04300_2	250,	0,	5.67919	7.7629
Chr1	1150755	1151041	AT1G04300_3	127,74,	0,212,	8.6867	7.7629
Chr1	1163152	1163302	AT1G04340_1	150,	0,	14.8876	9.03483
Chr1	1166495	1166742	AT1G04350_1	247,	0,	4.96429	14.2905
Chr1	1189238	1189386	AT1G04410_1	148,	0,	9.19737	328.059
Chr1	1193685	1193884	AT1G04420_1	199,	0,	17.2531	98.5979
Chr1	1217229	1217326	AT1G04480_1	97,	0,	8.31478	99.5157
Chr1	1230596	1230797	AT1G04510_1	201,	0,	32.5158	16.9029
Chr1	1231647	1231844	AT1G04520_1	197,	0,	7.49133	8.34518
Chr1	1233835	1233983	AT1G04520_2	148,	0,	4.93386	8.34518
Chr1	1234273	1234422	AT1G04530_1	149,	0,	7.45717	24.8446
Chr1	1241149	1241247	AT1G04550_1	98,	0,	2.29299	11.6526
Chr1	1241864	1242060	AT1G04550_2	196,	0,	2.60583	11.6526
Chr1	1243896	1244095	AT1G04555_1	199,	0,	11.2338	2.88668
Chr1	1258653	1258849	AT1G04590_1	196,	0,	16.5138	9.7863
Chr1	1282705	1282953	AT1G04620_1	248,	0,	8.99182	24.4342
Chr1	1289783	1289932	AT1G04630_1	149,	0,	10.8526	30.2512
Chr1	1292660	1292760	AT1G04640_1	100,	0,	1.63057	20.7294
Chr1	1293201	1293300	AT1G04640_2	99,	0,	2.31892	20.7294
Chr1	1301239	1301337	AT1G04660_2	98,	0,	1.91318	1.8969
Chr1	1315432	1315726	AT1G04690_1	294,	0,	5.26324	38.4044
Chr1	1324495	1324693	AT1G04710_1	198,	0,	11.2375	14.1519
Chr1	1331613	1331862	AT1G04750_1	249,	0,	23.7361	30.4921
Chr1	1337651	1337800	AT1G04770_1	149,	0,	2.19924	9.36267
Chr1	1340700	1341047	AT1G04780_1	347,	0,	4.14961	8.27926
Chr1	1341521	1341620	AT1G04780_2	99,	0,	2.04583	8.27926
Chr1	1348229	1348377	AT1G04790_1	148,	0,	13.7974	4.48742
Chr1	1348621	1348868	AT1G04790_2	247,	0,	3.63819	4.48742
Chr1	1348646	1349038	AT1G04800_1	392,	0,	3.37336	58.837
Chr1	1355166	1355366	AT1G04810_1	200,	0,	9.54091	11.9024
Chr1	1356231	1356478	AT1G04820_1	247,	0,	4.42999	168.991
Chr1	1357200	1357300	AT1G04820_2	100,	0,	1.56624	168.991
Chr1	1359019	1359169	AT1G04830_1	150,	0,	5.07177	4.27008
Chr1	1365155	1365451	AT1G04850_1	296,	0,	17.5413	32.5212
Chr1	1366286	1366862	AT1G04850_2	13,68,61,56,	0,104,314,520,	3.78716	32.5212
Chr1	1373381	1373529	AT1G04870_1	148,	0,	8.55087	13.5232
Chr1	1387920	1388021	AT1G04910_1	101,	0,	15.6335	8.8329
Chr1	1396607	1396864	AT1G04930_2	20,79,	0,178,	1.72035	1.60686
Chr1	1400580	1400780	AT1G04940_1	200,	0,	6.06902	1.46711
Chr1	1403232	1403331	AT1G04950_1	99,	0,	12.6059	5.81466
Chr1	1407869	1408164	AT1G04960_1	295,	0,	9.11752	7.10271
Chr1	1413477	1413577	AT1G04970_1	100,	0,	18.3393	5.81093
Chr1	1413741	1414036	AT1G04980_1	295,	0,	3.84942	23.8455
Chr1	1416390	1416924	AT1G04985_1	389,56,	0,478,	3.6163	9.73749
Chr1	1419156	1419257	AT1G04990_1	101,	0,	13.6842	9.02709
Chr1	1438145	1438392	AT1G05030_1	247,	0,	20.9864	4.70143
Chr1	1450750	1450851	AT1G05055_2	101,	0,	4.16396	5.97537
Chr1	1451099	1451482	AT1G05060_1	263,32,	0,351,	3.27267	9.37242
Chr1	1452626	1452725	AT1G05060_2	99,	0,	1.73306	9.37242
Chr1	1457105	1457205	AT1G05070_1	100,	0,	10.1022	11.3919
Chr1	1471421	1471852	AT1G05120_1	275,73,	0,358,	8.79748	4.80935
Chr1	1482691	1482839	AT1G05140_1	148,	0,	5.09599	44.432
Chr1	1483912	1484010	AT1G05140_2	98,	0,	3.80497	44.432
Chr1	1491071	1491416	AT1G05170_1	345,	0,	6.81555	5.86664
Chr1	1498261	1498459	AT1G05180_1	198,	0,	18.9112	11.3687
Chr1	1508852	1509102	AT1G05200_1	250,	0,	5.93636	8.61876
Chr1	1509244	1509387	AT1G05205_1	143,	0,	6.9002	16.4538
Chr1	1515342	1515443	AT1G05230_2	101,	0,	1.09076	6.10671
Chr1	1516914	1517014	AT1G05230_3	100,	0,	2.26631	6.10671
Chr1	1531740	1531840	AT1G05270_1	100,	0,	6.12762	13.9777
Chr1	1554893	1555132	AT1G05320_1	7,142,	0,97,	3.42334	5.2704
Chr1	1560726	1560923	AT1G05350_1	197,	0,	16.0471	12.261
Chr1	1577514	1577812	AT1G05380_1	298,	0,	2.36834	6.79375
Chr1	1577960	1578208	AT1G05380_2	248,	0,	2.34079	6.79375
Chr1	1578455	1578555	AT1G05380_3	100,	0,	1.96752	6.79375
Chr1	1582077	1582177	AT1G05380_4	100,	0,	1.87261	6.79375
Chr1	1585468	1585664	AT1G05410_1	196,	0,	7.24125	4.54649
Chr1	1594199	1594298	AT1G05430_1	99,	0,	4.56401	12.826
Chr1	1601246	1601844	AT1G05460_1	598,	0,	5.86068	4.09977
Chr1	1610897	1611345	AT1G05470_1	28,88,84,	0,176,364,	2.99426	2.24012
Chr1	1628989	1629189	AT1G05500_1	200,	0,	28.6462	12.1549
Chr1	1630898	1631148	AT1G05520_1	250,	0,	13.1143	9.72288
Chr1	1635369	1635569	AT1G05520_2	200,	0,	1.82628	9.72288
Chr1	1645705	1646203	AT1G05560_1	498,	0,	3.79211	22.4472
Chr1	1647673	1647973	AT1G05570_1	300,	0,	10.3508	8.14611
Chr1	1669944	1670094	AT1G05590_1	150,	0,	2.54125	5.22051
Chr1	1671554	1671852	AT1G05590_2	298,	0,	2.8565	5.22051
Chr1	1681563	1681661	AT1G05620_1	98,	0,	4.32397	5.43853
Chr1	1687263	1687363	AT1G05630_1	100,	0,	11.7301	8.09454
Chr1	1717487	1717685	AT1G05720_1	198,	0,	8.45874	9.4668
Chr1	1737198	1737434	AT1G05790_1	3,148,	0,88,	6.07813	5.36812
Chr1	1745141	1746233	AT1G05805_1	176,24,	0,1068,	1.49268	10.7622
Chr1	1747434	1747634	AT1G05805_2	200,	0,	5.34402	10.7622
Chr1	1749283	1749429	AT1G05810_1	146,	0,	3.95088	5.63162
Chr1	1754772	1754922	AT1G05830_1	150,	0,	3.31153	4.51036
Chr1	1761611	1761761	AT1G05830_2	150,	0,	13.9507	4.51036
Chr1	1762614	1762814	AT1G05835_1	200,	0,	6.38836	8.0947
Chr1	1762783	1762984	AT1G05840_1	201,	0,	11.0094	6.08939
Chr1	1766648	1766894	AT1G05850_1	246,	0,	6.77758	216.266
Chr1	1773185	1773285	AT1G05870_2	100,	0,	2.95337	9.76027
Chr1	1784180	1784527	AT1G05890_1	347,	0,	10.2474	10.9935
Chr1	1791708	1791957	AT1G05910_1	249,	0,	7.24836	7.1035
Chr1	1801208	1801358	AT1G05940_1	150,	0,	11.4773	11.3519
Chr1	1808058	1808554	AT1G05960_1	496,	0,	18.2489	10.1604
Chr1	1816022	1816271	AT1G05970_1	249,	0,	6.46758	3.19188
Chr1	1821496	1821795	AT1G06000_1	299,	0,	4.18661	59.9912
Chr1	1823710	1823950	AT1G06010_1	240,	0,	9.2645	6.2123
Chr1	1828536	1828684	AT1G06040_1	148,	0,	7.04282	15.7032
Chr1	1834131	1834324	AT1G06060_1	49,50,	0,143,	2.11484	6.52637
Chr1	1834665	1834812	AT1G06060_2	147,	0,	3.13255	6.52637
Chr1	1834926	1835464	AT1G06070_1	538,	0,	5.42498	5.20145
Chr1	1853108	1853257	AT1G06110_1	149,	0,	10.0581	6.56985
Chr1	1857854	1858100	AT1G06130_1	246,	0,	12.7444	11.2279
Chr1	1869038	1869188	AT1G06150_1	150,	0,	15.7858	9.81153
Chr1	1890786	1891032	AT1G06180_1	246,	0,	2.06297	2.33742
Chr1	1894385	1894627	AT1G06200_1	242,	0,	18.6627	18.9651
Chr1	1897275	1897680	AT1G06210_1	29,119,	0,286,	3.14109	10.4725
Chr1	1898795	1899188	AT1G06210_2	393,	0,	4.26439	10.4725
Chr1	1904646	1904847	AT1G06220_1	201,	0,	30.1005	15.8377
Chr1	1908704	1908804	AT1G06230_1	100,	0,	1.82841	9.27781
Chr1	1909301	1909700	AT1G06230_2	399,	0,	2.53669	9.27781
Chr1	1910011	1910807	AT1G06230_3	31,91,377,	0,125,419,	8.44668	9.27781
Chr1	1911343	1911667	AT1G06240_1	224,26,	0,298,	4.70661	9.81234
Chr1	1912896	1913146	AT1G06240_2	250,	0,	7.06	9.81234
Chr1	1918333	1918432	AT1G06270_2	99,	0,	1.73226	2.31121
Chr1	1925981	1926130	AT1G06290_1	149,	0,	9.11789	18.0839
Chr1	1945380	1945527	AT1G06380_1	147,	0,	1.57168	3.53796
Chr1	1950414	1950712	AT1G06390_1	298,	0,	13.0904	16.1164
Chr1	1950645	1950745	AT1G06400_1	100,	0,	36.2555	15.212
Chr1	1950892	1951141	AT1G06400_2	249,	0,	7.32673	15.212
Chr1	1958318	1958717	AT1G06410_1	399,	0,	7.49521	20.1002
Chr1	1960080	1960331	AT1G06430_1	251,	0,	10.1695	22.9647
Chr1	1967021	1967219	AT1G06450_1	198,	0,	4.06588	1.18151
Chr1	1969805	1970444	AT1G06470_1	78,21,	0,618,	2.03043	7.21449
Chr1	1973442	1973837	AT1G06470_2	395,	0,	18.8245	7.21449
Chr1	1990285	1990434	AT1G06500_1	149,	0,	2.31997	7.62342
Chr1	1990581	1990730	AT1G06500_2	149,	0,	17.0723	7.62342
Chr1	1993599	1993793	AT1G06510_1	194,	0,	6.73887	14.5276
Chr1	1990682	1990877	AT1G06515_1	195,	0,	10.7241	7.70675
Chr1	2003675	2004029	AT1G06550_1	207,42,	0,312,	6.59767	16.9919
Chr1	2033815	2033915	AT1G06640_1	100,	0,	4.43676	17.1906
Chr1	2037118	2037366	AT1G06650_1	248,	0,	11.6129	27.3105
Chr1	2047108	2047556	AT1G06670_1	448,	0,	4.03392	6.3623
Chr1	2047972	2048118	AT1G06680_1	146,	0,	1.71988	1893.61
Chr1	2049691	2049789	AT1G06690_1	98,	0,	5.39004	30.0743
Chr1	2052568	2052817	AT1G06700_1	249,	0,	16.1714	17.2382
Chr1	2060542	2061035	AT1G06720_1	234,164,	0,329,	8.75259	5.2717
Chr1	2062737	2063639	AT1G06720_2	84,94,318,	0,154,584,	2.62999	5.2717
Chr1	2067608	2067758	AT1G06730_1	150,	0,	2.64901	6.23871
Chr1	2070055	2070405	AT1G06730_2	350,	0,	10.5182	6.23871
Chr1	2077428	2077526	AT1G06760_1	98,	0,	1.77854	125.246
Chr1	2084889	2084989	AT1G06780_1	100,	0,	1.31736	2.83986
Chr1	2087278	2087654	AT1G06790_1	86,12,	0,364,	1.93814	4.03324
Chr1	2089252	2089592	AT1G06790_2	340,	0,	10.3582	4.03324
Chr1	2093044	2093193	AT1G06820_1	149,	0,	3.15886	13.7563
Chr1	2101905	2102323	AT1G06840_2	19,72,58,	0,172,360,	1.95187	3.32102
Chr1	2108707	2108807	AT1G06870_1	100,	0,	2.4027	7.09352
Chr1	2110691	2110986	AT1G06870_2	295,	0,	9.47099	7.09352
Chr1	2111521	2111821	AT1G06890_1	300,	0,	5.93339	26.919
Chr1	2115012	2115361	AT1G06900_1	349,	0,	5.44323	10.8089
Chr1	2120211	2120497	AT1G06900_2	20,180,	0,106,	4.8672	10.8089
Chr1	2130202	2130352	AT1G06950_1	150,	0,	15.8745	65.243
Chr1	2130908	2131009	AT1G06950_2	101,	0,	1.61954	65.243
Chr1	2135453	2135603	AT1G06950_3	150,	0,	4.00959	65.243
Chr1	2137102	2137299	AT1G06960_1	197,	0,	1.91253	6.65453
Chr1	2137494	2137789	AT1G06960_2	295,	0,	15.9738	6.65453
Chr1	2154971	2155220	AT1G07010_1	249,	0,	9.70549	17.5601
Chr1	2158462	2158662	AT1G07030_1	200,	0,	6.59945	10.064
Chr1	2161017	2161264	AT1G07040_1	247,	0,	5.8967	9.65035
Chr1	2162943	2163091	AT1G07040_2	148,	0,	4.11826	9.65035
Chr1	2169663	2169811	AT1G07070_1	148,	0,	10.0866	20.1851
Chr1	2171802	2171998	AT1G07080_1	196,	0,	11.3524	30.0562
Chr1	2174790	2174890	AT1G07090_1	100,	0,	3.41079	9.96203
Chr1	2178220	2178420	AT1G07110_1	200,	0,	11.7389	52.3897
Chr1	2190353	2190450	AT1G07135_1	97,	0,	1.58883	5.42254
Chr1	2190544	2190641	AT1G07135_2	97,	0,	2.14471	5.42254
Chr1	2192020	2192217	AT1G07140_1	197,	0,	4.70548	116.087
Chr1	2192362	2192559	AT1G07140_2	197,	0,	3.12727	116.087
Chr1	2200928	2201174	AT1G07170_1	246,	0,	6.48946	4.31892
Chr1	2216740	2216934	AT1G07210_1	194,	0,	17.0022	16.4929
Chr1	2218749	2219450	AT1G07220_2	158,191,	0,510,	2.25854	5.62413
Chr1	2220279	2220575	AT1G07230_1	296,	0,	7.63741	9.93797
Chr1	2222672	2222919	AT1G07230_2	247,	0,	2.31862	9.93797
Chr1	2226058	2226209	AT1G07250_1	151,	0,	5.42565	15.8206
Chr1	2240927	2241076	AT1G07280_1	149,	0,	3.08943	33.1438
Chr1	2247561	2247662	AT1G07310_1	101,	0,	4.41006	11.0965
Chr1	2248110	2248411	AT1G07310_2	301,	0,	4.11323	11.0965
Chr1	2249210	2249309	AT1G07320_1	99,	0,	2.45583	258.242
Chr1	2250235	2250480	AT1G07320_2	245,	0,	5.31089	258.242
Chr1	2257532	2257879	AT1G07350_1	347,	0,	3.72679	13.3406
Chr1	2260414	2260612	AT1G07360_1	198,	0,	5.61786	13.164
Chr1	2260709	2260808	AT1G07360_2	99,	0,	2.53633	13.164
Chr1	2260906	2261005	AT1G07360_3	99,	0,	1.90994	13.164
Chr1	2280058	2280256	AT1G07420_1	198,	0,	15.6185	8.86717
Chr1	2286378	2286476	AT1G07440_1	98,	0,	5.4904	46.2487
Chr1	2294187	2294558	AT1G07470_1	67,232,	0,139,	12.3218	5.90619
Chr1	2296468	2296805	AT1G07480_1	261,38,	0,299,	12.1243	4.50592
Chr1	2309016	2309166	AT1G07510_1	150,	0,	1.66644	3.99409
Chr1	2309364	2309514	AT1G07510_2	150,	0,	3.43047	3.99409
Chr1	2310956	2311106	AT1G07510_4	150,	0,	1.88391	3.99409
Chr1	2339292	2339391	AT1G07590_1	99,	0,	1.45646	16.4719
Chr1	2342246	2342493	AT1G07615_1	247,	0,	4.28247	4.45985
Chr1	2349360	2349509	AT1G07630_1	149,	0,	1.98317	4.85596
Chr1	2359606	2359905	AT1G07650_1	299,	0,	9.61825	9.43464
Chr1	2381095	2381292	AT1G07700_1	197,	0,	14.1052	17.121
Chr1	2385808	2386058	AT1G07705_1	250,	0,	13.8134	6.77756
Chr1	2408236	2408431	AT1G07770_1	195,	0,	8.08543	76.6678
Chr1	2420531	2420730	AT1G07810_1	199,	0,	9.43796	7.56038
Chr1	2423464	2423706	AT1G07830_1	242,	0,	7.09782	9.50326
Chr1	2425785	2426124	AT1G07840_1	77,173,	0,166,	3.06695	8.01103
Chr1	2426272	2426629	AT1G07840_2	34,216,	0,141,	8.18691	8.01103
Chr1	2439515	2439615	AT1G07890_1	100,	0,	5.30477	257.5
Chr1	2457027	2457223	AT1G07920_1	196,	0,	1.96791	78.2968
Chr1	2460467	2460668	AT1G07930_1	201,	0,	3.7013	122.683
Chr1	2462997	2463243	AT1G07940_1	246,	0,	7.42218	51.8892
Chr1	2465826	2465974	AT1G07950_1	148,	0,	3.98502	9.09743
Chr1	2468828	2469170	AT1G07960_1	342,	0,	15.1973	9.4374
Chr1	2472359	2472459	AT1G07970_2	100,	0,	2.72407	3.8675
Chr1	2474583	2474881	AT1G07980_2	298,	0,	2.37901	5.37348
Chr1	2481228	2481842	AT1G07990_1	69,133,47,	0,351,567,	2.04273	8.09855
Chr1	2482651	2483147	AT1G07990_2	496,	0,	9.3033	8.09855
Chr1	2483288	2483486	AT1G08000_1	198,	0,	2.76795	3.32779
Chr1	2484025	2484124	AT1G08000_2	99,	0,	2.27587	3.32779
Chr1	2485995	2486194	AT1G08010_1	199,	0,	3.6163	6.93101
Chr1	2489507	2489705	AT1G08030_1	198,	0,	9.56967	4.74556
Chr1	2493080	2493179	AT1G08030_2	99,	0,	2.68764	4.74556
Chr1	2495407	2495696	AT1G08040_1	195,3,	0,286,	6.41567	11.3858
Chr1	2502673	2502774	AT1G08060_2	101,	0,	1.74428	2.29422
Chr1	2505183	2505383	AT1G08060_3	200,	0,	3.9369	2.29422
Chr1	2537688	2537883	AT1G08110_1	195,	0,	14.9551	32.2012
Chr1	2539711	2539950	AT1G08125_1	48,99,	0,140,	6.41575	7.43104
Chr1	2542760	2542958	AT1G08130_1	198,	0,	14.7777	9.6292
Chr1	2547699	2547799	AT1G08130_2	100,	0,	2.55539	9.6292
Chr1	2560188	2560335	AT1G08160_1	147,	0,	2.84117	3.19908
Chr1	2564982	2565079	AT1G08180_2	97,	0,	2.50166	2.319
Chr1	2567568	2567818	AT1G08190_1	250,	0,	3.74191	32.1315
Chr1	2573049	2573349	AT1G08190_2	300,	0,	9.70795	32.1315
Chr1	2573967	2574267	AT1G08200_1	300,	0,	12.6289	102.7
Chr1	2577081	2577279	AT1G08210_1	198,	0,	3.75072	4.76056
Chr1	2634834	2634933	AT1G08350_2	99,	0,	1.79796	2.27502
Chr1	2637665	2637859	AT1G08360_1	194,	0,	10.1092	142.321
Chr1	2639812	2640058	AT1G08370_1	246,	0,	3.18779	8.26778
Chr1	2640155	2640516	AT1G08370_2	90,206,	0,155,	5.91336	8.26778
Chr1	2646340	2646440	AT1G08410_1	100,	0,	2.1832	5.31047
Chr1	2656524	2657070	AT1G08420_1	546,	0,	4.01604	15.4364
Chr1	2667896	2668524	AT1G08450_1	123,33,87,57,	0,238,391,571,	4.26932	63.8672
Chr1	2674423	2674573	AT1G08460_1	150,	0,	7.73765	6.74949
Chr1	2682155	2682401	AT1G08470_1	246,	0,	3.17127	12.6944
Chr1	2683876	2684024	AT1G08470_2	148,	0,	2.66943	12.6944
Chr1	2685451	2685602	AT1G08480_1	151,	0,	15.7697	33.8061
Chr1	2685707	2685955	AT1G08490_1	248,	0,	12.7315	22.8464
Chr1	2688411	2688510	AT1G08490_2	99,	0,	1.97935	22.8464
Chr1	2691161	2691610	AT1G08510_1	449,	0,	6.48775	30.1174
Chr1	2696579	2696680	AT1G08520_1	101,	0,	2.01881	94.9834
Chr1	2698992	2699271	AT1G08520_2	122,78,	0,201,	5.52594	94.9834
Chr1	2700772	2700872	AT1G08520_3	100,	0,	11.4928	94.9834
Chr1	2702868	2703113	AT1G08530_1	245,	0,	7.95907	8.15349
Chr1	2706509	2706760	AT1G08540_1	251,	0,	12.9876	57.137
Chr1	2709043	2709491	AT1G08550_1	448,	0,	7.17571	37.8527
Chr1	2715183	2715537	AT1G08580_1	174,64,	0,290,	5.01007	20.9127
Chr1	2716246	2716342	AT1G08580_2	96,	0,	2.88546	20.9127
Chr1	2724564	2724815	AT1G08600_1	251,	0,	8.2123	3.29847
Chr1	2731292	2731803	AT1G08600_2	60,41,	0,470,	2.33513	3.29847
Chr1	2748460	2748711	AT1G08640_1	251,	0,	12.7578	42.9546
Chr1	2751120	2751220	AT1G08640_2	100,	0,	3.38217	42.9546
Chr1	2752221	2752417	AT1G08650_1	196,	0,	3.4427	12.9897
Chr1	2756952	2757347	AT1G08660_1	395,	0,	4.53461	8.69235
Chr1	2759593	2759741	AT1G08660_2	148,	0,	3.26527	8.69235
Chr1	2768370	2768619	AT1G08680_1	249,	0,	16.6257	6.34466
Chr1	2769907	2770006	AT1G08700_1	99,	0,	2.29156	8.59168
Chr1	2770201	2770397	AT1G08700_2	196,	0,	2.17842	8.59168
Chr1	2771036	2771233	AT1G08700_3	197,	0,	3.02115	8.59168
Chr1	2809873	2810115	AT1G08780_1	242,	0,	3.16151	14.7752
Chr1	2813757	2814253	AT1G08800_2	496,	0,	2.26388	1.83208
Chr1	2821502	2821851	AT1G08820_1	349,	0,	17.0319	7.5077
Chr1	2829120	2829218	AT1G08830_1	98,	0,	12.8211	168.556
Chr1	2855592	2855692	AT1G08900_1	100,	0,	6.37142	5.67908
Chr1	2859436	2859684	AT1G08910_1	248,	0,	1.81024	3.5728
Chr1	2877019	2877119	AT1G08930_1	100,	0,	8.51222	18.4987
Chr1	2877918	2878066	AT1G08940_1	148,	0,	3.20633	1.92709
Chr1	2882587	2882686	AT1G08970_1	99,	0,	4.46514	11.2656
Chr1	2883854	2883952	AT1G08970_2	98,	0,	7.14731	11.2656
Chr1	2884097	2884245	AT1G08970_3	148,	0,	9.99895	11.2656
Chr1	2886423	2886572	AT1G08980_1	149,	0,	4.6734	38.4467
Chr1	2899974	2900174	AT1G09020_1	200,	0,	8.78991	19.0056
Chr1	2904612	2904812	AT1G09020_2	200,	0,	3.08491	19.0056
Chr1	2921162	2921262	AT1G09060_1	100,	0,	11.8831	8.26898
Chr1	2936625	2936725	AT1G09100_1	100,	0,	11.336	9.94387
Chr1	2939714	2939813	AT1G09130_1	99,	0,	12.3813	83.2626
Chr1	2942635	2942832	AT1G09140_1	197,	0,	17.8736	13.7508
Chr1	2948750	2949111	AT1G09150_1	23,221,	0,140,	12.5287	13.4619
Chr1	2952894	2953094	AT1G09160_1	200,	0,	9.7179	8.96764
Chr1	2966706	2966804	AT1G09190_2	98,	0,	2.53757	2.11654
Chr1	2981362	2981809	AT1G09230_1	36,82,32,	0,178,415,	5.21649	2.69721
Chr1	2994479	2994628	AT1G09270_1	149,	0,	4.11608	20.6973
Chr1	2997626	2998222	AT1G09270_2	596,	0,	5.86546	20.6973
Chr1	3001487	3001686	AT1G09290_1	199,	0,	10.8115	4.36755
Chr1	3003514	3003713	AT1G09290_2	199,	0,	3.83829	4.36755
Chr1	3003594	3003745	AT1G09300_1	151,	0,	5.33713	2.16304
Chr1	3009107	3009256	AT1G09310_1	149,	0,	3.2073	520.466
Chr1	3010869	3011100	AT1G09320_2	16,83,	0,148,	2.20752	2.92781
Chr1	3011669	3011867	AT1G09320_3	198,	0,	1.87057	2.92781
Chr1	3012835	3012982	AT1G09330_1	147,	0,	6.91251	12.2894
Chr1	3018049	3018148	AT1G09340_1	99,	0,	7.18945	405.153
Chr1	3038080	3038268	AT1G09415_1	188,	0,	5.29068	15.6548
Chr1	3044997	3045343	AT1G09430_1	346,	0,	15.3236	23.457
Chr1	3045307	3045688	AT1G09440_1	292,5,	0,376,	2.02033	3.30549
Chr1	3056604	3056803	AT1G09470_2	55,43,	0,156,	1.77457	2.00981
Chr1	3065705	3065852	AT1G09490_1	147,	0,	6.18605	15.9476
Chr1	3071687	3071833	AT1G09520_1	146,	0,	1.97105	6.54523
Chr1	3079259	3079407	AT1G09530_1	148,	0,	8.63737	2.44207
Chr1	3095308	3095507	AT1G09570_1	199,	0,	7.41816	7.2127
Chr1	3107413	3107704	AT1G09590_1	291,	0,	4.161	109.535
Chr1	3112926	3113026	AT1G09620_1	100,	0,	6.66303	30.3401
Chr1	3118253	3118403	AT1G09630_1	150,	0,	5.6538	13.2342
Chr1	3122241	3122442	AT1G09640_1	201,	0,	8.5557	76.6686
Chr1	3124328	3124522	AT1G09645_1	194,	0,	7.80851	9.09809
Chr1	3127860	3128060	AT1G09660_1	200,	0,	11.0525	15.846
Chr1	3136332	3136430	AT1G09690_1	98,	0,	6.06771	190.255
Chr1	3137843	3138381	AT1G09700_1	538,	0,	4.52693	4.16059
Chr1	3147736	3148185	AT1G09730_1	449,	0,	4.94933	5.94447
Chr1	3157599	3157846	AT1G09750_1	247,	0,	4.7501	94.2132
Chr1	3157944	3158142	AT1G09750_2	198,	0,	3.39363	94.2132
Chr1	3159223	3159422	AT1G09760_1	199,	0,	15.9903	21.0161
Chr1	3162696	3162946	AT1G09770_1	250,	0,	3.01453	24.277
Chr1	3163745	3163846	AT1G09770_2	101,	0,	2.06288	24.277
Chr1	3164577	3165316	AT1G09770_3	99,551,	0,188,	6.24962	24.277
Chr1	3165415	3165566	AT1G09770_4	151,	0,	3.11096	24.277
Chr1	3172144	3173222	AT1G09794_1	137,7,	0,1071,	2.29816	2.18347
Chr1	3176665	3176861	AT1G09795_1	196,	0,	13.4235	75.2483
Chr1	3192715	3192864	AT1G09830_1	149,	0,	8.16658	19.8278
Chr1	3194747	3194945	AT1G09830_2	198,	0,	4.96257	19.8278
Chr1	3195867	3196577	AT1G09840_1	335,63,	0,647,	6.69244	9.79637
Chr1	3203857	3204101	AT1G09850_1	244,	0,	10.4837	19.9876
Chr1	3208417	3208615	AT1G09870_1	198,	0,	8.64552	7.85743
Chr1	3224732	3224978	AT1G09920_1	246,	0,	9.00585	14.5373
Chr1	3237005	3237299	AT1G09940_1	294,	0,	6.05405	7.91372
Chr1	3237396	3237592	AT1G09940_2	196,	0,	1.79323	7.91372
Chr1	3252297	3252548	AT1G09970_1	251,	0,	4.18055	17.4756
Chr1	3255132	3255382	AT1G09970_2	250,	0,	5.11747	17.4756
Chr1	3255531	3255632	AT1G09970_3	101,	0,	1.76634	17.4756
Chr1	3256385	3256584	AT1G09980_1	199,	0,	19.3349	5.60432
Chr1	3283185	3283433	AT1G10050_1	248,	0,	4.74197	2.81158
Chr1	3290359	3290656	AT1G10090_1	297,	0,	12.1009	9.97872
Chr1	3304087	3304562	AT1G10120_1	163,85,48,	0,253,427,	3.34741	5.00545
Chr1	3305233	3305381	AT1G10120_2	148,	0,	3.71515	5.00545
Chr1	3321920	3322169	AT1G10130_1	249,	0,	24.3162	8.45053
Chr1	3333653	3333904	AT1G10170_1	251,	0,	3.04582	8.28913
Chr1	3337001	3337302	AT1G10170_2	301,	0,	2.51337	8.28913
Chr1	3374726	3375051	AT1G10290_1	26,74,	0,251,	1.7259	25.1094
Chr1	3377067	3377364	AT1G10290_2	297,	0,	15.4256	25.1094
Chr1	3381595	3381795	AT1G10310_1	200,	0,	16.3686	15.3732
Chr1	3387795	3388376	AT1G10320_2	87,408,	0,173,	10.3014	4.13414
Chr1	3393386	3393584	AT1G10350_1	198,	0,	3.27595	7.18088
Chr1	3395598	3395745	AT1G10360_1	147,	0,	5.20144	29.0073
Chr1	3407104	3407602	AT1G10390_1	498,	0,	3.98734	13.8273
Chr1	3410115	3410216	AT1G10390_2	101,	0,	1.84182	13.8273
Chr1	3416728	3416929	AT1G10410_1	201,	0,	10.8527	6.46548
Chr1	3428526	3428723	AT1G10430_1	197,	0,	10.9774	13.1269
Chr1	3436195	3436396	AT1G10450_1	201,	0,	1.85148	3.57925
Chr1	3442487	3442587	AT1G10470_1	100,	0,	5.27779	51.1374
Chr1	3459529	3459773	AT1G10490_1	62,88,	0,156,	1.23185	6.09447
Chr1	3459872	3460172	AT1G10490_2	300,	0,	13.7845	6.09447
Chr1	3460049	3460149	AT1G10500_1	100,	0,	21.4183	37.4154
Chr1	3461684	3461785	AT1G10510_1	101,	0,	2.59543	21.9642
Chr1	3465535	3465736	AT1G10510_2	201,	0,	13.6853	21.9642
Chr1	3471240	3471439	AT1G10522_1	199,	0,	10.1745	20.7458
Chr1	3491307	3491557	AT1G10580_1	250,	0,	9.48577	17.0438
Chr1	3492936	3493236	AT1G10580_2	300,	0,	6.32888	17.0438
Chr1	3502135	3502235	AT1G10590_1	100,	0,	9.52634	66.7492
Chr1	3505185	3505526	AT1G10600_1	341,	0,	8.59305	6.79178
Chr1	3512934	3513180	AT1G10630_1	246,	0,	10.7583	27.9697
Chr1	3524084	3524233	AT1G10650_1	149,	0,	3.59403	5.63391
Chr1	3534889	3535088	AT1G10660_1	199,	0,	6.15229	8.8528
Chr1	3537978	3538223	AT1G10670_1	245,	0,	9.4372	69.2552
Chr1	3556251	3556495	AT1G10700_1	244,	0,	7.24048	9.40466
Chr1	3563380	3563479	AT1G10720_1	99,	0,	3.85897	7.7909
Chr1	3564555	3564703	AT1G10720_2	148,	0,	4.59514	7.7909
Chr1	3568247	3568446	AT1G10740_1	199,	0,	12.9374	7.6007
Chr1	3581078	3581229	AT1G10760_1	151,	0,	11.8114	84.8902
Chr1	3600958	3601304	AT1G10820_1	346,	0,	5.35468	6.28574
Chr1	3604675	3604978	AT1G10820_2	8,190,	0,113,	3.34113	6.28574
Chr1	3605611	3605711	AT1G10830_1	100,	0,	9.13439	14.233
Chr1	3607280	3607431	AT1G10830_2	151,	0,	3.92658	14.233
Chr1	3607776	3607922	AT1G10840_1	146,	0,	9.3733	35.8054
Chr1	3613088	3613239	AT1G10850_1	151,	0,	3.90232	6.8245
Chr1	3614362	3614513	AT1G10850_2	151,	0,	5.99555	6.8245
Chr1	3614607	3614799	AT1G10865_1	192,	0,	7.08698	7.66803
Chr1	3616708	3616908	AT1G10870_1	200,	0,	16.0997	5.26484
Chr1	3629229	3630609	AT1G10890_1	75,220,355,	0,615,1025,	7.83284	11.7034
Chr1	3635929	3636029	AT1G10900_2	100,	0,	1.62841	3.76389
Chr1	3643889	3644137	AT1G10910_1	248,	0,	9.64081	11.2261
Chr1	3646940	3647040	AT1G10920_3	100,	0,	1.53861	2.2184
Chr1	3647974	3648465	AT1G10930_1	397,2,	0,489,	3.61789	5.44146
Chr1	3655870	3656169	AT1G10940_1	299,	0,	8.15335	23.5939
Chr1	3659302	3660365	AT1G10950_1	109,41,	0,1022,	2.67401	40.6086
Chr1	3663618	3663917	AT1G10950_2	299,	0,	6.81214	40.6086
Chr1	3664470	3664566	AT1G10960_1	96,	0,	3.8037	354.805
Chr1	3678323	3678518	AT1G11020_1	195,	0,	6.52668	5.21351
Chr1	3725015	3725165	AT1G11130_2	150,	0,	3.2316	6.30399
Chr1	3748263	3748411	AT1G11180_1	148,	0,	3.39293	7.69413
Chr1	3755461	3755560	AT1G11200_1	99,	0,	12.8443	7.51424
Chr1	3755960	3756059	AT1G11210_1	99,	0,	1.74329	6.20111
Chr1	3756411	3756510	AT1G11210_2	99,	0,	1.82396	6.20111
Chr1	3766802	3767100	AT1G11240_1	298,	0,	5.31948	7.24193
Chr1	3767411	3767924	AT1G11240_2	109,40,	0,473,	3.03259	7.24193
Chr1	3780077	3780178	AT1G11260_1	101,	0,	1.81809	19.747
Chr1	3787416	3787516	AT1G11280_1	100,	0,	5.1661	4.45564
Chr1	3791266	3791366	AT1G11290_1	100,	0,	3.48469	2.33588
Chr1	3800650	3800851	AT1G11303_1	201,	0,	9.71681	2.42575
Chr1	3800844	3800992	AT1G11310_1	148,	0,	3.27778	45.2685
Chr1	3801090	3801189	AT1G11310_2	99,	0,	3.57953	45.2685
Chr1	3813361	3813560	AT1G11330_1	199,	0,	7.22954	16.0212
Chr1	3821496	3821693	AT1G11360_1	197,	0,	7.69434	9.88485
Chr1	3822060	3822257	AT1G11360_2	197,	0,	1.68134	9.88485
Chr1	3822354	3822452	AT1G11360_3	98,	0,	1.4793	9.88485
Chr1	3832661	3832860	AT1G11380_1	199,	0,	1.61337	3.48534
Chr1	3839999	3840196	AT1G11400_1	197,	0,	16.6189	4.29328
Chr1	3848828	3849076	AT1G11430_1	248,	0,	10.092	90.8833
Chr1	3850041	3850240	AT1G11440_1	199,	0,	9.42922	7.36425
Chr1	3863794	3863981	AT1G11475_1	187,	0,	19.5538	21.0663
Chr1	3864141	3864437	AT1G11480_1	296,	0,	9.71305	12.1995
Chr1	3866802	3866901	AT1G11480_2	99,	0,	2.89445	12.1995
Chr1	3875251	3875391	AT1G11530_1	140,	0,	6.27657	18.6976
Chr1	3913584	3913732	AT1G11630_1	148,	0,	1.50238	3.36587
Chr1	3917943	3918094	AT1G11650_1	151,	0,	21.9344	99.0239
Chr1	3923981	3924516	AT1G11660_1	130,269,	0,266,	5.50341	8.49559
Chr1	3952545	3952846	AT1G11720_1	301,	0,	1.73296	13.9358
Chr1	3953194	3953345	AT1G11720_2	151,	0,	2.5572	13.9358
Chr1	3956793	3956994	AT1G11720_3	201,	0,	10.6919	13.9358
Chr1	3969528	3969628	AT1G11750_1	100,	0,	6.29592	66.5475
Chr1	3969728	3969874	AT1G11755_1	146,	0,	11.9372	4.22101
Chr1	3977429	3977578	AT1G11780_1	149,	0,	10.7622	4.45038
Chr1	3985019	3985119	AT1G11790_1	100,	0,	10.5553	16.7269
Chr1	3997526	3997770	AT1G11840_1	244,	0,	8.02928	109.932
Chr1	4003248	4003349	AT1G11860_1	101,	0,	5.08855	736.801
Chr1	4003906	4004176	AT1G11870_1	193,7,	0,263,	1.9648	11.1391
Chr1	4006565	4006716	AT1G11870_2	151,	0,	16.1476	11.1391
Chr1	4012854	4013054	AT1G11890_1	200,	0,	14.8217	24.3431
Chr1	4016861	4017112	AT1G11910_1	251,	0,	5.39242	98.5927
Chr1	4030264	4030509	AT1G11930_1	245,	0,	6.49135	36.3757
Chr1	4050042	4050190	AT1G12000_1	148,	0,	15.8488	29.194
Chr1	4063200	4063301	AT1G12020_1	101,	0,	2.17121	3.07661
Chr1	4075864	4076108	AT1G12050_1	5,145,	0,99,	11.7348	15.7957
Chr1	4076273	4076465	AT1G12060_1	192,	0,	3.25119	5.52742
Chr1	4076799	4076943	AT1G12060_2	144,	0,	2.41169	5.52742
Chr1	4084591	4084839	AT1G12080_1	248,	0,	5.26464	25.7092
Chr1	4090458	4090608	AT1G12090_1	150,	0,	1.85155	226.476
Chr1	4109307	4109454	AT1G12110_1	147,	0,	6.67199	47.2801
Chr1	4114870	4115266	AT1G12120_1	396,	0,	3.14958	14.4215
Chr1	4146369	4146470	AT1G12220_1	101,	0,	1.83693	3.12472
Chr1	4150662	4150958	AT1G12230_1	296,	0,	12.7078	24.2301
Chr1	4157402	4157503	AT1G12240_1	101,	0,	4.31332	52.2944
Chr1	4158898	4158997	AT1G12244_1	99,	0,	11.1548	7.60549
Chr1	4161257	4161407	AT1G12250_1	150,	0,	21.2051	35.2114
Chr1	4172682	4172932	AT1G12270_1	250,	0,	3.93464	16.9013
Chr1	4174090	4174730	AT1G12270_2	21,60,269,	0,120,371,	3.75334	16.9013
Chr1	4194718	4195524	AT1G12330_1	29,420,	0,386,	4.19261	9.93018
Chr1	4196499	4196649	AT1G12330_2	150,	0,	1.89117	9.93018
Chr1	4200410	4200800	AT1G12350_1	390,	0,	7.16507	6.4963
Chr1	4206092	4206339	AT1G12360_1	247,	0,	14.4757	10.386
Chr1	4215193	4215342	AT1G12380_1	149,	0,	1.44094	4.19639
Chr1	4216770	4216870	AT1G12380_3	100,	0,	2.29009	4.19639
Chr1	4221505	4221704	AT1G12390_1	199,	0,	9.24366	4.19756
Chr1	4222585	4222827	AT1G12400_1	242,	0,	2.65893	3.18583
Chr1	4224915	4225061	AT1G12410_1	146,	0,	6.96391	102.719
Chr1	4226923	4227022	AT1G12420_2	99,	0,	2.06193	3.32591
Chr1	4228917	4229064	AT1G12420_3	147,	0,	1.46876	3.32591
Chr1	4233864	4234211	AT1G12430_1	347,	0,	10.5702	7.79072
Chr1	4236383	4236694	AT1G12430_2	165,34,	0,277,	2.62545	7.79072
Chr1	4241615	4241763	AT1G12440_1	148,	0,	1.82234	18.4695
Chr1	4245744	4245844	AT1G12450_1	100,	0,	3.25669	2.69536
Chr1	4257094	4257392	AT1G12470_1	298,	0,	10.3911	7.82041
Chr1	4257316	4257416	AT1G12480_1	100,	0,	20.7469	1.96114
Chr1	4263346	4263594	AT1G12500_1	248,	0,	3.9363	12.056
Chr1	4264662	4264910	AT1G12500_2	248,	0,	3.04919	12.056
Chr1	4267171	4267516	AT1G12520_1	345,	0,	4.06767	33.0323
Chr1	4268735	4268835	AT1G12520_2	100,	0,	1.99138	33.0323
Chr1	4269032	4269365	AT1G12530_1	333,	0,	10.6019	7.06571
Chr1	4274728	4274828	AT1G12550_1	100,	0,	2.38274	3.44951
Chr1	4285431	4285827	AT1G12580_1	396,	0,	6.90733	7.2056
Chr1	4303477	4303578	AT1G12640_1	101,	0,	7.44079	10.3941
Chr1	4307213	4307908	AT1G12650_1	121,47,331,	0,232,364,	8.59457	7.50663
Chr1	4319925	4320221	AT1G12680_1	296,	0,	7.22056	6.12847
Chr1	4337556	4337807	AT1G12730_1	251,	0,	15.8892	2.83619
Chr1	4345042	4345192	AT1G12750_1	150,	0,	5.08045	4.57805
Chr1	4346664	4346765	AT1G12750_2	101,	0,	1.97001	4.57805
Chr1	4350545	4350745	AT1G12760_1	200,	0,	5.70352	18.0523
Chr1	4353448	4353598	AT1G12770_1	150,	0,	5.30021	23.1076
Chr1	4356024	4356306	AT1G12780_1	184,15,	0,267,	2.487	7.90655
Chr1	4361698	4361846	AT1G12800_1	148,	0,	3.99616	75.3558
Chr1	4364140	4364289	AT1G12800_2	149,	0,	1.59481	75.3558
Chr1	4364386	4364486	AT1G12800_3	100,	0,	1.78927	75.3558
Chr1	4368580	4368774	AT1G12810_1	194,	0,	10.6902	10.9952
Chr1	4374597	4374844	AT1G12840_1	247,	0,	9.11863	53.2992
Chr1	4378218	4378465	AT1G12840_2	247,	0,	18.0018	53.2992
Chr1	4379792	4379892	AT1G12850_1	100,	0,	4.69287	16.4023
Chr1	4381466	4381566	AT1G12850_2	100,	0,	5.39574	16.4023
Chr1	4384598	4384796	AT1G12860_1	198,	0,	2.84667	10.3748
Chr1	4384894	4385141	AT1G12860_2	247,	0,	3.43187	10.3748
Chr1	4386453	4386553	AT1G12860_3	100,	0,	5.61907	10.3748
Chr1	4390536	4391100	AT1G12880_1	4,150,237,	0,95,327,	3.44284	3.03544
Chr1	4398420	4398766	AT1G12930_1	346,	0,	12.0015	4.75885
Chr1	4405138	4405323	AT1G12930_2	67,32,	0,153,	2.66791	4.75885
Chr1	4405470	4405570	AT1G12930_3	100,	0,	2.93444	4.75885
Chr1	4424035	4424185	AT1G12970_1	150,	0,	1.96541	2.67767
Chr1	4435802	4435952	AT1G12990_1	150,	0,	5.70613	9.47316
Chr1	4436200	4436501	AT1G13000_1	301,	0,	10.2568	4.64304
Chr1	4445755	4446796	AT1G13030_2	51,78,67,174,218,	0,170,402,573,823,	2.90744	3.31344
Chr1	4454606	4454802	AT1G13060_1	196,	0,	10.9224	39.4591
Chr1	4464981	4465180	AT1G13100_1	199,	0,	2.15976	2.38635
Chr1	4469242	4469440	AT1G13120_1	198,	0,	15.0061	5.28691
Chr1	4471363	4471561	AT1G13120_2	198,	0,	3.46273	5.28691
Chr1	4472239	4472339	AT1G13120_3	100,	0,	2.85976	5.28691
Chr1	4487521	4487669	AT1G13160_1	148,	0,	3.80781	7.26677
Chr1	4488232	4488528	AT1G13160_2	296,	0,	5.41271	7.26677
Chr1	4488682	4489282	AT1G13170_1	332,168,	0,432,	3.30363	8.83232
Chr1	4491867	4491968	AT1G13170_2	101,	0,	1.626	8.83232
Chr1	4500544	4500741	AT1G13190_1	197,	0,	4.43088	11.9848
Chr1	4501132	4501231	AT1G13190_2	99,	0,	2.00231	11.9848
Chr1	4516769	4517443	AT1G13220_1	85,271,145,	0,169,529,	3.10796	3.86524
Chr1	4517691	4518342	AT1G13220_2	651,	0,	3.98138	3.86524
Chr1	4518491	4518641	AT1G13220_3	150,	0,	3.17069	3.86524
Chr1	4529576	4529775	AT1G13250_1	199,	0,	4.24827	10.6395
Chr1	4529923	4530023	AT1G13250_2	100,	0,	2.49636	10.6395
Chr1	4547024	4547274	AT1G13270_1	250,	0,	10.8839	51.5131
Chr1	4547636	4547835	AT1G13280_1	199,	0,	2.19978	20.9908
Chr1	4548595	4548695	AT1G13280_2	100,	0,	2.39959	20.9908
Chr1	4563526	4563776	AT1G13320_1	250,	0,	14.4647	19.3182
Chr1	4575548	4575924	AT1G13350_2	287,10,	0,366,	11.2237	7.70307
Chr1	4589140	4589238	AT1G13380_1	98,	0,	5.40638	11.3597
Chr1	4592599	4592847	AT1G13390_1	248,	0,	3.80969	6.92471
Chr1	4614552	4614653	AT1G13450_2	101,	0,	2.6402	4.27074
Chr1	4614902	4615053	AT1G13450_3	151,	0,	2.5899	4.27074
Chr1	4615864	4615964	AT1G13460_1	100,	0,	5.45184	5.65531
Chr1	4618104	4618301	AT1G13460_2	197,	0,	5.15454	5.65531
Chr1	4620390	4620682	AT1G13470_1	292,	0,	6.13262	10.0687
Chr1	4638616	4638815	AT1G13560_1	199,	0,	13.5137	20.046
Chr1	4694074	4694410	AT1G13690_1	336,	0,	6.06139	13.45
Chr1	4711122	4711220	AT1G13730_1	98,	0,	2.87212	9.62729
Chr1	4712133	4712525	AT1G13730_2	392,	0,	5.27517	9.62729
Chr1	4714323	4714423	AT1G13740_1	100,	0,	2.66918	4.7094
Chr1	4714763	4714962	AT1G13740_2	199,	0,	3.75258	4.7094
Chr1	4715442	4715591	AT1G13750_1	149,	0,	6.63675	8.19537
Chr1	4728900	4729383	AT1G13790_1	29,69,198,	0,114,285,	3.98212	1.41165
Chr1	4737520	4737861	AT1G13820_1	341,	0,	11.4078	28.432
Chr1	4747329	4747474	AT1G13870_1	145,	0,	11.1573	6.77145
Chr1	4774637	4774787	AT1G13950_1	150,	0,	7.81053	4.75566
Chr1	4777824	4777925	AT1G13960_1	101,	0,	2.13826	4.41488
Chr1	4778172	4778553	AT1G13960_2	244,55,	0,326,	3.59936	4.41488
Chr1	4778922	4779271	AT1G13960_3	349,	0,	5.79348	4.41488
Chr1	4796405	4796551	AT1G13990_1	146,	0,	9.59998	11.3525
Chr1	4799989	4800234	AT1G14000_1	245,	0,	11.3814	23.8273
Chr1	4800216	4800410	AT1G14010_1	194,	0,	17.3412	19.5203
Chr1	4804257	4804406	AT1G14020_1	149,	0,	1.92833	7.9238
Chr1	4805078	4805375	AT1G14020_2	297,	0,	13.6151	7.9238
Chr1	4805354	4805502	AT1G14030_1	148,	0,	9.98383	21.3896
Chr1	4817174	4817421	AT1G14060_1	247,	0,	3.37024	8.12854
Chr1	4817568	4817668	AT1G14060_2	100,	0,	2.05038	8.12854
Chr1	4817864	4817964	AT1G14060_3	100,	0,	1.99429	8.12854
Chr1	4843331	4843479	AT1G14170_1	148,	0,	6.01143	6.39879
Chr1	4854513	4854804	AT1G14200_1	291,	0,	2.41482	7.01696
Chr1	4856824	4856968	AT1G14210_1	144,	0,	2.31865	7.09193
Chr1	4857062	4857283	AT1G14210_2	120,23,	0,198,	2.76466	7.09193
Chr1	4863844	4863994	AT1G14230_1	150,	0,	9.60887	5.80713
Chr1	4874923	4875072	AT1G14270_1	149,	0,	17.8508	33.6766
Chr1	4880078	4880327	AT1G14290_1	249,	0,	11.3561	4.45575
Chr1	4882483	4882633	AT1G14300_1	150,	0,	7.43941	4.70125
Chr1	4886491	4886744	AT1G14310_1	10,139,	0,114,	6.63979	9.0544
Chr1	4889411	4889558	AT1G14320_1	147,	0,	5.95586	255.641
Chr1	4898744	4898938	AT1G14340_1	194,	0,	12.9351	7.30396
Chr1	4899236	4899333	AT1G14345_1	97,	0,	7.65107	91.1173
Chr1	4908269	4908822	AT1G14350_1	250,47,3,	0,337,550,	9.12167	4.72554
Chr1	4911237	4911335	AT1G14360_1	98,	0,	8.64357	25.7079
Chr1	4917939	4918138	AT1G14370_1	199,	0,	11.4538	2.47029
Chr1	4927082	4927282	AT1G14400_1	200,	0,	15.6748	36.9941
Chr1	4929169	4929319	AT1G14410_1	150,	0,	5.55433	19.9052
Chr1	4939148	4939297	AT1G14440_1	149,	0,	1.58207	4.25963
Chr1	4939445	4939594	AT1G14440_2	149,	0,	2.28517	4.25963
Chr1	4939840	4939940	AT1G14440_3	100,	0,	2.02984	4.25963
Chr1	4946284	4947343	AT1G14450_1	204,31,	0,1028,	7.11817	5.38918
Chr1	4949175	4949357	AT1G14460_2	44,56,	0,126,	1.56059	3.85799
Chr1	4951451	4951650	AT1G14460_3	199,	0,	3.08704	3.85799
Chr1	4961942	4962342	AT1G14510_1	400,	0,	2.36851	14.9509
Chr1	4969535	4969707	AT1G14520_2	82,17,	0,155,	1.61188	1.37267
Chr1	4983067	4983218	AT1G14560_1	151,	0,	5.51194	4.29485
Chr1	4990108	4990485	AT1G14580_1	148,2,	0,375,	2.18591	3.70281
Chr1	4991860	4992059	AT1G14580_2	199,	0,	2.14496	3.70281
Chr1	4998866	4999016	AT1G14590_1	150,	0,	8.11841	5.23708
Chr1	5001380	5002034	AT1G14600_2	62,37,	0,617,	2.2486	1.29888
Chr1	5008251	5008851	AT1G14610_1	425,73,	0,527,	5.00335	22.7394
Chr1	5013429	5013655	AT1G14610_2	37,63,	0,163,	3.17189	22.7394
Chr1	5014772	5014970	AT1G14620_1	198,	0,	14.6265	9.48653
Chr1	5028916	5029315	AT1G14650_1	399,	0,	3.00293	11.4932
Chr1	5030396	5030746	AT1G14650_2	350,	0,	6.74463	11.4932
Chr1	5040251	5040449	AT1G14670_1	198,	0,	4.44083	40.7724
Chr1	5043988	5044239	AT1G14685_1	251,	0,	2.71843	8.23205
Chr1	5051803	5052050	AT1G14690_1	247,	0,	7.22744	7.72713
Chr1	5052147	5052532	AT1G14690_2	281,15,	0,370,	3.19858	7.72713
Chr1	5060941	5061090	AT1G14700_1	149,	0,	5.52259	7.11116
Chr1	5061942	5062241	AT1G14710_1	299,	0,	8.03177	18.971
Chr1	5062340	5062589	AT1G14710_2	249,	0,	2.98346	18.971
Chr1	5063841	5064209	AT1G14710_3	89,62,	0,306,	2.79184	18.971
Chr1	5065053	5065154	AT1G14710_4	101,	0,	5.03701	18.971
Chr1	5066723	5066823	AT1G14720_1	100,	0,	6.813	19.744
Chr1	5075376	5075872	AT1G14740_1	496,	0,	4.88886	14.0341
Chr1	5102572	5102721	AT1G14810_1	149,	0,	10.8427	56.0449
Chr1	5104502	5104652	AT1G14810_2	150,	0,	2.92644	56.0449
Chr1	5105172	5105322	AT1G14820_1	150,	0,	12.0829	8.35808
Chr1	5107464	5107759	AT1G14830_1	295,	0,	11.104	22.2164
Chr1	5112099	5112349	AT1G14840_1	250,	0,	4.70061	9.87601
Chr1	5112635	5112930	AT1G14840_2	94,106,	0,189,	2.08268	9.87601
Chr1	5113968	5114175	AT1G14840_3	50,51,	0,156,	1.68531	9.87601
Chr1	5138459	5138607	AT1G14900_1	148,	0,	3.51398	8.9693
Chr1	5139809	5139958	AT1G14910_1	149,	0,	7.32502	11.3388
Chr1	5149329	5149429	AT1G14920_1	100,	0,	3.19912	17.7581
Chr1	5165636	5165932	AT1G14980_1	296,	0,	4.63718	58.8928
Chr1	5167156	5167352	AT1G14990_1	196,	0,	12.4786	6.85415
Chr1	5168657	5168804	AT1G15000_1	147,	0,	2.74775	10.4074
Chr1	5179852	5180000	AT1G15030_1	148,	0,	13.7592	11.6558
Chr1	5183582	5183927	AT1G15060_1	345,	0,	5.99914	7.23783
Chr1	5186613	5186909	AT1G15060_2	296,	0,	2.36015	7.23783
Chr1	5203895	5204145	AT1G15120_1	250,	0,	17.999	47.1318
Chr1	5204660	5205217	AT1G15125_1	15,292,92,	0,97,465,	3.02643	3.78814
Chr1	5205814	5205914	AT1G15125_2	100,	0,	2.15904	3.78814
Chr1	5206051	5206251	AT1G15130_1	200,	0,	11.8267	14.6351
Chr1	5206349	5206500	AT1G15130_2	151,	0,	4.5145	14.6351
Chr1	5210279	5210479	AT1G15140_1	200,	0,	10.9987	84.0138
Chr1	5211951	5212151	AT1G15140_2	200,	0,	4.67956	84.0138
Chr1	5216965	5217248	AT1G15160_3	71,79,	0,204,	4.33777	2.12201
Chr1	5226529	5226629	AT1G15180_1	100,	0,	4.51564	10.2612
Chr1	5228397	5229019	AT1G15200_1	484,53,	0,569,	8.4068	20.1274
Chr1	5242567	5242965	AT1G15230_1	398,	0,	3.94008	14.0376
Chr1	5244124	5244225	AT1G15240_1	101,	0,	1.48058	5.11198
Chr1	5245383	5245584	AT1G15240_2	201,	0,	2.00608	5.11198
Chr1	5248442	5248693	AT1G15240_3	251,	0,	11.7093	5.11198
Chr1	5248712	5248812	AT1G15250_1	100,	0,	2.62555	16.2909
Chr1	5250697	5250841	AT1G15270_1	144,	0,	8.00697	138.916
Chr1	5252661	5253363	AT1G15280_1	274,76,	0,626,	3.92678	15.9194
Chr1	5256463	5256713	AT1G15280_2	250,	0,	15.5875	15.9194
Chr1	5257118	5257518	AT1G15290_1	400,	0,	4.59292	20.2103
Chr1	5261960	5262061	AT1G15290_2	101,	0,	1.94776	20.2103
Chr1	5264714	5264815	AT1G15290_3	101,	0,	1.78165	20.2103
Chr1	5275763	5276703	AT1G15340_1	940,	0,	6.74359	52.8277
Chr1	5288395	5288542	AT1G15370_1	147,	0,	14.1004	16.9104
Chr1	5295633	5295782	AT1G15390_1	149,	0,	11.0754	19.4881
Chr1	5300681	5300878	AT1G15410_1	197,	0,	8.69064	5.58952
Chr1	5301612	5301954	AT1G15420_1	342,	0,	5.46954	7.66124
Chr1	5308563	5308713	AT1G15440_2	150,	0,	2.89176	6.37481
Chr1	5317644	5317842	AT1G15470_1	198,	0,	7.48215	10.3082
Chr1	5328626	5328825	AT1G15500_1	199,	0,	4.84057	48.0354
Chr1	5331261	5331361	AT1G15510_1	100,	0,	2.20166	3.88502
Chr1	5340108	5340355	AT1G15530_1	247,	0,	4.13434	5.5675
Chr1	5383546	5383954	AT1G15660_1	65,70,15,	0,155,393,	4.01322	4.53973
Chr1	5384444	5384595	AT1G15660_2	151,	0,	5.76663	4.53973
Chr1	5402282	5402383	AT1G15690_1	101,	0,	3.13527	415.519
Chr1	5404426	5404723	AT1G15710_1	297,	0,	3.70214	8.91716
Chr1	5404821	5404971	AT1G15710_2	150,	0,	3.21021	8.91716
Chr1	5407450	5407649	AT1G15730_1	199,	0,	11.3735	23.8182
Chr1	5414519	5414819	AT1G15740_1	300,	0,	18.2518	11.2177
Chr1	5414866	5415116	AT1G15750_1	250,	0,	7.2203	25.818
Chr1	5434504	5434802	AT1G15780_1	298,	0,	2.83407	5.64878
Chr1	5435049	5435299	AT1G15780_2	129,21,	0,229,	2.91198	5.64878
Chr1	5444515	5444665	AT1G15810_1	150,	0,	2.39501	10.3539
Chr1	5445009	5445258	AT1G15810_2	249,	0,	2.30427	10.3539
Chr1	5446267	5446564	AT1G15810_3	297,	0,	3.26272	10.3539
Chr1	5456726	5456973	AT1G15860_1	247,	0,	9.15512	10.8775
Chr1	5458542	5458786	AT1G15880_1	244,	0,	17.133	10.325
Chr1	5461099	5461248	AT1G15885_1	149,	0,	9.37926	5.92738
Chr1	5467521	5468076	AT1G15910_1	197,4,	0,551,	3.77155	6.15864
Chr1	5468780	5469080	AT1G15910_2	300,	0,	12.4298	6.15864
Chr1	5472753	5472901	AT1G15930_1	148,	0,	13.0537	100.14
Chr1	5477207	5478255	AT1G15940_1	1048,	0,	5.032	5.00432
Chr1	5481788	5482131	AT1G15950_1	343,	0,	5.0349	18.1712
Chr1	5486370	5486617	AT1G15970_1	247,	0,	9.71036	8.02714
Chr1	5489880	5489979	AT1G15980_1	99,	0,	1.82694	128.566
Chr1	5491117	5491314	AT1G15980_2	197,	0,	6.62091	128.566
Chr1	5495171	5495266	AT1G16000_1	95,	0,	8.63296	21.2764
Chr1	5495422	5495522	AT1G16010_1	100,	0,	7.86186	12.6799
Chr1	5501110	5501309	AT1G16020_1	199,	0,	27.6218	7.06028
Chr1	5502607	5502806	AT1G16030_1	199,	0,	2.23076	1.62859
Chr1	5506372	5506618	AT1G16040_1	246,	0,	8.96756	3.39017
Chr1	5515828	5515928	AT1G16080_1	100,	0,	9.62904	115.011
Chr1	5538814	5538914	AT1G16170_1	100,	0,	6.84862	4.64335
Chr1	5542651	5542802	AT1G16180_1	151,	0,	6.43901	39.0414
Chr1	5545854	5546053	AT1G16190_1	199,	0,	12.2696	6.61494
Chr1	5546147	5546342	AT1G16210_1	195,	0,	12.6044	32.8283
Chr1	5547218	5547316	AT1G16210_2	98,	0,	1.81885	32.8283
Chr1	5555089	5555189	AT1G16240_1	100,	0,	13.0142	17.224
Chr1	5559547	5559798	AT1G16260_1	251,	0,	3.37503	7.54798
Chr1	5564982	5565280	AT1G16270_1	298,	0,	2.75782	4.29525
Chr1	5568085	5569054	AT1G16280_1	549,99,41,	0,729,928,	5.15284	2.99217
Chr1	5580918	5581163	AT1G16320_1	245,	0,	2.78302	27.2393
Chr1	5581909	5582105	AT1G16320_2	196,	0,	2.37188	27.2393
Chr1	5587869	5587969	AT1G16340_1	100,	0,	9.02632	7.59822
Chr1	5591612	5591761	AT1G16350_1	149,	0,	3.34621	20.7918
Chr1	5592899	5592999	AT1G16350_2	100,	0,	6.15501	20.7918
Chr1	5608879	5609029	AT1G16410_1	150,	0,	2.68609	46.2545
Chr1	5615376	5615471	AT1G16430_1	95,	0,	2.25654	5.4393
Chr1	5619693	5619892	AT1G16460_1	199,	0,	15.8258	23.6483
Chr1	5625290	5625585	AT1G16470_1	3,195,	0,100,	4.59033	30.9707
Chr1	5650922	5651118	AT1G16520_1	196,	0,	6.76133	11.2479
Chr1	5670413	5670708	AT1G16560_1	295,	0,	10.1895	17.3297
Chr1	5670625	5670774	AT1G16570_1	149,	0,	18.5799	4.46112
Chr1	5675691	5675988	AT1G16610_1	297,	0,	18.0994	16.4191
Chr1	5682818	5683018	AT1G16630_1	200,	0,	1.76811	2.74238
Chr1	5683117	5683317	AT1G16630_2	200,	0,	2.05387	2.74238
Chr1	5683763	5683864	AT1G16630_3	101,	0,	2.80378	2.74238
Chr1	5705542	5705842	AT1G16680_1	300,	0,	8.32282	6.85243
Chr1	5711656	5711898	AT1G16700_1	242,	0,	13.4454	29.4063
Chr1	5716288	5716544	AT1G16710_1	28,123,	0,133,	2.50204	3.61623
Chr1	5723288	5723389	AT1G16720_1	101,	0,	1.84903	45.0026
Chr1	5726178	5726378	AT1G16720_2	200,	0,	7.47027	45.0026
Chr1	5727720	5727871	AT1G16740_1	151,	0,	6.06108	20.6828
Chr1	5728915	5729065	AT1G16740_2	150,	0,	11.4389	20.6828
Chr1	5729105	5729255	AT1G16750_1	150,	0,	5.50196	4.78773
Chr1	5756199	5756798	AT1G16810_1	98,391,	0,208,	6.6322	33.7183
Chr1	5762792	5762942	AT1G16840_1	150,	0,	2.34755	13.33
Chr1	5763935	5764035	AT1G16840_2	100,	0,	2.77992	13.33
Chr1	5767397	5767594	AT1G16860_1	197,	0,	4.70653	19.0492
Chr1	5769870	5770062	AT1G16860_2	27,72,	0,120,	2.11657	19.0492
Chr1	5770258	5770455	AT1G16860_3	197,	0,	6.8377	19.0492
Chr1	5770781	5771030	AT1G16870_1	249,	0,	3.77255	11.5624
Chr1	5776111	5776259	AT1G16880_1	148,	0,	5.60322	282.996
Chr1	5776225	5776566	AT1G16890_1	341,	0,	17.573	29.6901
Chr1	5779107	5779307	AT1G16900_1	200,	0,	16.0726	5.2627
Chr1	5786605	5786752	AT1G16916_1	147,	0,	3.24396	4.65165
Chr1	5787341	5787535	AT1G16920_1	194,	0,	5.12002	20.5102
Chr1	5831133	5831283	AT1G17050_1	150,	0,	9.92889	13.9581
Chr1	5837938	5838687	AT1G17070_1	749,	0,	4.55669	5.4049
Chr1	5838786	5838886	AT1G17070_2	100,	0,	2.32502	5.4049
Chr1	5840364	5840461	AT1G17080_1	97,	0,	4.37079	20.7951
Chr1	5842264	5842362	AT1G17090_1	98,	0,	1.76695	2.44285
Chr1	5845723	5846219	AT1G17110_1	496,	0,	10.4663	7.32506
Chr1	5855181	5855962	AT1G17130_1	91,66,51,85,	0,233,549,696,	3.26739	14.2487
Chr1	5856165	5856600	AT1G17130_2	8,334,	0,101,	5.1104	14.2487
Chr1	5856771	5856872	AT1G17140_1	101,	0,	2.9028	23.547
Chr1	5857020	5857470	AT1G17140_2	450,	0,	2.82451	23.547
Chr1	5860126	5860373	AT1G17145_1	247,	0,	6.4101	3.84601
Chr1	5861424	5861621	AT1G17145_2	62,37,	0,160,	2.24545	3.84601
Chr1	5880145	5880546	AT1G17210_1	401,	0,	10.6419	13.6274
Chr1	5890250	5890350	AT1G17220_1	100,	0,	8.95408	133.369
Chr1	5916930	5917130	AT1G17280_1	200,	0,	8.12397	6.95777
Chr1	5917278	5917379	AT1G17280_2	101,	0,	1.71796	6.95777
Chr1	5922826	5922976	AT1G17290_1	150,	0,	4.22204	45.484
Chr1	5926052	5926350	AT1G17290_2	298,	0,	5.8278	45.484
Chr1	5931400	5931728	AT1G17330_1	29,220,	0,108,	5.97021	8.72464
Chr1	5938418	5938718	AT1G17340_1	300,	0,	7.3528	4.61227
Chr1	5944165	5944415	AT1G17350_1	250,	0,	8.14523	3.07596
Chr1	5949674	5949775	AT1G17360_1	101,	0,	2.28418	6.68619
Chr1	5950171	5950321	AT1G17360_2	150,	0,	1.93092	6.68619
Chr1	5951311	5951511	AT1G17360_3	200,	0,	7.83245	6.68619
Chr1	5951640	5951789	AT1G17370_1	149,	0,	16.7904	25.6908
Chr1	5981221	5981421	AT1G17420_1	200,	0,	2.29036	6.63239
Chr1	5982773	5982870	AT1G17430_1	97,	0,	2.26023	8.01149
Chr1	5984083	5984533	AT1G17440_1	450,	0,	5.02272	10.1839
Chr1	5985493	5985794	AT1G17440_2	301,	0,	4.64508	10.1839
Chr1	5987134	5987734	AT1G17440_3	600,	0,	6.50942	10.1839
Chr1	5998310	5998407	AT1G17455_1	97,	0,	4.10085	4.15391
Chr1	6006118	6006313	AT1G17470_1	195,	0,	5.70493	34.1363
Chr1	6008628	6009084	AT1G17490_1	71,122,	0,334,	2.81167	12.9177
Chr1	6009179	6009276	AT1G17490_2	97,	0,	4.11064	12.9177
Chr1	6024732	6025545	AT1G17520_1	258,286,41,	0,360,772,	4.91449	4.1108
Chr1	6027175	6027322	AT1G17520_2	147,	0,	2.29793	4.1108
Chr1	6027683	6027782	AT1G17530_1	99,	0,	2.10929	9.47473
Chr1	6036899	6037199	AT1G17550_1	300,	0,	11.6593	18.4869
Chr1	6037554	6037655	AT1G17560_1	101,	0,	6.85978	4.34235
Chr1	6040952	6041142	AT1G17580_1	17,84,	0,106,	2.50684	4.28264
Chr1	6062579	6062726	AT1G17620_1	147,	0,	2.93678	13.6295
Chr1	6069521	6069621	AT1G17650_1	100,	0,	8.22625	32.0546
Chr1	6072300	6072400	AT1G17665_1	100,	0,	6.47199	8.63583
Chr1	6073980	6074179	AT1G17665_2	199,	0,	3.56073	8.63583
Chr1	6074277	6074476	AT1G17665_3	199,	0,	5.17623	8.63583
Chr1	6076419	6076570	AT1G17680_1	151,	0,	2.31752	4.93959
Chr1	6080411	6080655	AT1G17680_2	37,114,	0,130,	1.95449	4.93959
Chr1	6087203	6087826	AT1G17690_1	50,125,26,	0,214,597,	3.99486	5.30263
Chr1	6093384	6094084	AT1G17720_1	700,	0,	4.11426	18.8973
Chr1	6100103	6100299	AT1G17730_1	196,	0,	11.9029	15.3838
Chr1	6110155	6110625	AT1G17760_1	225,71,	0,399,	4.10406	4.895
Chr1	6125042	6125191	AT1G17780_1	149,	0,	4.09575	4.02312
Chr1	6131585	6132029	AT1G17820_1	444,	0,	5.47539	4.27793
Chr1	6145977	6146225	AT1G17840_1	248,	0,	12.6282	22.976
Chr1	6145974	6146269	AT1G17850_1	295,	0,	12.1003	5.22603
Chr1	6151830	6151929	AT1G17870_2	99,	0,	2.14942	1.7068
Chr1	6152477	6152620	AT1G17880_1	143,	0,	4.60331	108.748
Chr1	6184965	6185165	AT1G17970_1	200,	0,	3.1971	4.42768
Chr1	6185314	6185464	AT1G17970_2	150,	0,	2.93696	4.42768
Chr1	6187149	6187300	AT1G17970_3	151,	0,	2.93796	4.42768
Chr1	6187562	6187760	AT1G17980_1	198,	0,	4.52652	5.90347
Chr1	6188780	6188969	AT1G17980_2	98,1,	0,188,	1.1832	5.90347
Chr1	6191313	6191511	AT1G17980_3	198,	0,	2.70136	5.90347
Chr1	6211930	6212080	AT1G18060_1	150,	0,	17.1783	45.8413
Chr1	6213799	6214049	AT1G18070_1	250,	0,	12.5264	36.4806
Chr1	6223941	6224042	AT1G18080_1	101,	0,	9.99325	215.989
Chr1	6227524	6227723	AT1G18090_1	199,	0,	7.56239	1.93852
Chr1	6244444	6244642	AT1G18150_1	198,	0,	12.7074	18.2978
Chr1	6255490	6255637	AT1G18170_1	147,	0,	9.48908	42.1571
Chr1	6259519	6260145	AT1G18190_2	18,111,271,	0,130,355,	3.59823	3.94639
Chr1	6278886	6279086	AT1G18260_1	200,	0,	9.16449	17.3198
Chr1	6282474	6282718	AT1G18265_1	244,	0,	2.53506	6.15374
Chr1	6283468	6283718	AT1G18270_1	250,	0,	11.3451	5.51729
Chr1	6311540	6311687	AT1G18340_1	147,	0,	8.09041	3.98864
Chr1	6316792	6316990	AT1G18360_1	198,	0,	10.1015	11.7455
Chr1	6319697	6319847	AT1G18370_1	150,	0,	4.91211	3.90602
Chr1	6320376	6320604	AT1G18370_2	96,54,	0,174,	1.98158	3.90602
Chr1	6331794	6332198	AT1G18400_2	26,126,48,	0,129,356,	3.53184	3.27215
Chr1	6347618	6347768	AT1G18440_1	150,	0,	8.86375	7.79294
Chr1	6351613	6351961	AT1G18450_1	6,241,	0,107,	9.83747	13.2217
Chr1	6355994	6356444	AT1G18470_1	450,	0,	8.33846	7.40651
Chr1	6365568	6365668	AT1G18485_1	100,	0,	2.0231	5.78204
Chr1	6366014	6366213	AT1G18485_2	199,	0,	3.68345	5.78204
Chr1	6368581	6368731	AT1G18490_1	150,	0,	9.94194	6.38244
Chr1	6369364	6369615	AT1G18500_1	251,	0,	7.42334	21.4399
Chr1	6372829	6373030	AT1G18500_2	201,	0,	18.9259	21.4399
Chr1	6377334	6377736	AT1G18540_1	269,31,	0,371,	2.99463	152.761
Chr1	6400726	6400826	AT1G18600_1	100,	0,	2.23347	9.14475
Chr1	6402546	6402745	AT1G18600_2	199,	0,	9.39549	9.14475
Chr1	6414073	6414420	AT1G18620_1	347,	0,	3.05207	6.30381
Chr1	6416266	6416459	AT1G18630_1	193,	0,	18.9775	7.21787
Chr1	6416266	6416611	AT1G18640_1	345,	0,	17.9341	12.3403
Chr1	6418887	6419086	AT1G18650_1	199,	0,	3.73472	9.42692
Chr1	6419185	6419285	AT1G18650_2	100,	0,	1.5184	9.42692
Chr1	6420442	6420543	AT1G18650_3	101,	0,	1.88854	9.42692
Chr1	6425552	6425800	AT1G18660_1	248,	0,	10.4118	13.8019
Chr1	6437573	6437674	AT1G18700_1	101,	0,	1.97665	6.62938
Chr1	6442754	6443134	AT1G18700_2	71,229,	0,151,	6.73102	6.62938
Chr1	6452771	6452969	AT1G18710_1	198,	0,	5.33488	3.29924
Chr1	6457873	6458072	AT1G18720_1	199,	0,	4.91374	36.5297
Chr1	6459536	6459685	AT1G18720_2	149,	0,	2.9456	36.5297
Chr1	6462051	6462295	AT1G18730_1	244,	0,	11.4635	75.3653
Chr1	6481305	6481769	AT1G18800_1	220,23,	0,441,	5.70542	18.0545
Chr1	6482095	6482407	AT1G18800_2	5,62,31,	0,127,281,	1.90285	18.0545
Chr1	6500852	6501051	AT1G18840_1	199,	0,	3.72132	6.7604
Chr1	6501540	6501739	AT1G18840_2	199,	0,	2.14891	6.7604
Chr1	6503012	6503386	AT1G18840_3	68,32,	0,342,	1.76441	6.7604
Chr1	6504822	6504920	AT1G18850_1	98,	0,	2.53236	3.79759
Chr1	6523259	6523508	AT1G18890_1	249,	0,	4.30058	6.79219
Chr1	6546724	6546825	AT1G18950_2	101,	0,	2.67106	6.95684
Chr1	6550861	6551161	AT1G18950_3	300,	0,	5.03501	6.95684
Chr1	6551259	6551510	AT1G18950_4	251,	0,	3.68253	6.95684
Chr1	6568095	6568330	AT1G19020_1	235,	0,	2.10842	2.59807
Chr1	6605244	6605480	AT1G19110_1	51,50,	0,186,	3.95398	9.83549
Chr1	6605728	6605878	AT1G19110_2	150,	0,	6.44814	9.83549
Chr1	6609177	6609369	AT1G19120_1	192,	0,	14.3781	15.3791
Chr1	6609372	6609515	AT1G19130_1	143,	0,	7.67984	23.9048
Chr1	6610748	6611090	AT1G19140_1	342,	0,	10.2442	10.3264
Chr1	6618808	6618907	AT1G19170_1	99,	0,	7.37418	5.53825
Chr1	6623034	6623181	AT1G19180_1	147,	0,	2.37621	2.80579
Chr1	6649341	6649491	AT1G19240_1	150,	0,	17.174	6.51323
Chr1	6663681	6663938	AT1G19270_1	34,116,	0,141,	2.65862	3.01934
Chr1	6671836	6672282	AT1G19300_1	446,	0,	3.50584	7.87542
Chr1	6672380	6672480	AT1G19300_2	100,	0,	2.69951	7.87542
Chr1	6680617	6680862	AT1G19330_1	245,	0,	10.407	6.97117
Chr1	6689475	6689774	AT1G19350_1	299,	0,	3.00297	30.0791
Chr1	6690270	6690371	AT1G19350_2	101,	0,	2.27814	30.0791
Chr1	6690569	6690669	AT1G19350_3	100,	0,	4.36134	30.0791
Chr1	6690545	6690693	AT1G19360_1	148,	0,	3.8383	5.85759
Chr1	6692320	6692419	AT1G19360_2	99,	0,	2.8918	5.85759
Chr1	6712070	6712219	AT1G19400_1	149,	0,	12.8606	16.0473
Chr1	6724511	6724808	AT1G19430_1	297,	0,	6.07401	6.80081
Chr1	6726839	6727235	AT1G19430_2	396,	0,	3.98623	6.80081
Chr1	6730583	6730881	AT1G19440_1	298,	0,	4.23251	8.61323
Chr1	6751161	6751510	AT1G19485_1	349,	0,	12.3594	3.40471
Chr1	6760057	6760257	AT1G19520_1	200,	0,	2.98206	8.8569
Chr1	6760555	6760755	AT1G19520_2	200,	0,	2.37082	8.8569
Chr1	6762547	6762698	AT1G19520_3	151,	0,	7.97958	8.8569
Chr1	6777120	6777419	AT1G19580_1	299,	0,	11.4655	16.4546
Chr1	6780923	6781023	AT1G19600_1	100,	0,	5.99269	15.8902
Chr1	6796236	6796436	AT1G19650_1	200,	0,	7.63916	5.0545
Chr1	6800065	6800399	AT1G19660_1	203,42,	0,292,	4.33459	45.74
Chr1	6807663	6807862	AT1G19680_1	199,	0,	14.6646	7.59961
Chr1	6807764	6807965	AT1G19690_1	201,	0,	9.93547	8.11718
Chr1	6809781	6809930	AT1G19700_1	149,	0,	6.88069	5.49949
Chr1	6810125	6810274	AT1G19700_2	149,	0,	3.93022	5.49949
Chr1	6811833	6811981	AT1G19700_3	148,	0,	2.35767	5.49949
Chr1	6816630	6816876	AT1G19710_1	246,	0,	11.3214	5.34521
Chr1	6816751	6816902	AT1G19715_1	151,	0,	14.2523	12.7205
Chr1	6822943	6823186	AT1G19730_1	243,	0,	5.48164	7.10928
Chr1	6824439	6824634	AT1G19740_1	195,	0,	5.64901	63.1323
Chr1	6825264	6825362	AT1G19740_2	98,	0,	5.69442	63.1323
Chr1	6832373	6832909	AT1G19770_1	95,346,	0,190,	6.28064	15.1631
Chr1	6847933	6848031	AT1G19800_1	98,	0,	8.47064	15.6735
Chr1	6891481	6891731	AT1G19860_1	250,	0,	7.73312	5.36938
Chr1	6900484	6900977	AT1G19880_1	493,	0,	3.42633	12.5062
Chr1	6914343	6914489	AT1G19910_1	146,	0,	8.0059	62.0393
Chr1	6914664	6914812	AT1G19920_1	148,	0,	9.21084	53.6884
Chr1	6916528	6916725	AT1G19920_2	197,	0,	4.23	53.6884
Chr1	6925853	6926692	AT1G19950_1	29,654,	0,185,	4.89552	6.69118
Chr1	6931059	6931206	AT1G19970_1	147,	0,	6.82498	4.34487
Chr1	6935413	6935512	AT1G19990_1	99,	0,	2.72156	6.38444
Chr1	6935609	6935953	AT1G19990_2	2,96,50,	0,108,294,	4.62889	6.38444
Chr1	6936584	6936781	AT1G19990_3	197,	0,	8.53469	6.38444
Chr1	6938013	6938112	AT1G20010_1	99,	0,	4.53799	81.5782
Chr1	6950169	6950267	AT1G20050_1	98,	0,	8.36018	30.2413
Chr1	6968566	6968911	AT1G20090_1	345,	0,	6.80856	20.2705
Chr1	6971522	6972120	AT1G20110_1	598,	0,	4.3676	14.8938
Chr1	6974532	6974832	AT1G20110_2	300,	0,	17.1192	14.8938
Chr1	7001235	7001533	AT1G20200_1	298,	0,	5.54218	27.9006
Chr1	7004969	7005067	AT1G20220_1	98,	0,	7.495	33.6647
Chr1	7005341	7006334	AT1G20220_2	154,57,57,75,65,30,	0,273,437,611,773,963,	9.10768	33.6647
Chr1	7007852	7007999	AT1G20225_1	147,	0,	17.5485	15.7593
Chr1	7020247	7020543	AT1G20260_1	296,	0,	21.5057	78.7871
Chr1	7020809	7020956	AT1G20270_1	147,	0,	10.1949	5.42805
Chr1	7043192	7043342	AT1G20340_1	150,	0,	6.1577	1834.68
Chr1	7078951	7079099	AT1G20410_1	148,	0,	2.15947	5.70644
Chr1	7079780	7080125	AT1G20410_2	2,75,71,	0,112,274,	2.0843	5.70644
Chr1	7083260	7083411	AT1G20430_1	151,	0,	4.61971	11.002
Chr1	7084704	7084804	AT1G20440_1	100,	0,	1.37597	60.5523
Chr1	7085000	7085343	AT1G20440_2	180,18,	0,325,	3.08229	60.5523
Chr1	7085688	7085788	AT1G20440_3	100,	0,	2.85067	60.5523
Chr1	7088246	7088770	AT1G20450_1	441,3,	0,521,	4.74155	66.6296
Chr1	7093194	7093393	AT1G20460_1	199,	0,	11.9681	3.68067
Chr1	7103460	7103758	AT1G20510_1	298,	0,	10.564	12.4743
Chr1	7105477	7105824	AT1G20510_2	347,	0,	3.10435	12.4743
Chr1	7115166	7115362	AT1G20540_1	196,	0,	20.4859	7.78067
Chr1	7119768	7119917	AT1G20560_1	149,	0,	11.9748	7.41156
Chr1	7126843	7127037	AT1G20575_1	194,	0,	12.8716	6.51859
Chr1	7128616	7128714	AT1G20575_2	98,	0,	2.11458	6.51859
Chr1	7130404	7130553	AT1G20580_1	149,	0,	12.1975	47.8166
Chr1	7149586	7149735	AT1G20630_1	149,	0,	16.6843	14.6181
Chr1	7156742	7156843	AT1G20640_1	101,	0,	1.77975	3.6729
Chr1	7157337	7157488	AT1G20640_2	151,	0,	2.34534	3.6729
Chr1	7157737	7157838	AT1G20640_3	101,	0,	1.65167	3.6729
Chr1	7158365	7158465	AT1G20650_2	100,	0,	2.7168	5.39201
Chr1	7167743	7167992	AT1G20670_2	249,	0,	14.1806	4.53081
Chr1	7179521	7179621	AT1G20696_1	100,	0,	3.79681	69.321
Chr1	7180993	7181475	AT1G20696_2	80,319,	0,163,	2.77089	69.321
Chr1	7215058	7215205	AT1G20770_1	147,	0,	14.7198	15.0366
Chr1	7220344	7220444	AT1G20780_1	100,	0,	2.27154	6.08493
Chr1	7220543	7220743	AT1G20780_2	200,	0,	7.83188	6.08493
Chr1	7233367	7233513	AT1G20810_1	146,	0,	12.8522	39.8008
Chr1	7234756	7235081	AT1G20816_1	13,224,	0,101,	10.1761	6.64332
Chr1	7238836	7238980	AT1G20823_1	144,	0,	3.45447	6.86943
Chr1	7244677	7244878	AT1G20830_1	201,	0,	15.0251	10.8761
Chr1	7276991	7277190	AT1G20910_1	199,	0,	12.2779	5.54633
Chr1	7285388	7286329	AT1G20920_1	941,	0,	15.3709	11.029
Chr1	7289645	7289745	AT1G20920_2	100,	0,	12.25	11.029
Chr1	7297337	7297535	AT1G20950_1	198,	0,	7.34777	24.0308
Chr1	7301698	7301998	AT1G20960_1	300,	0,	14.7708	24.9104
Chr1	7308619	7308869	AT1G20960_2	250,	0,	3.24151	24.9104
Chr1	7309068	7309318	AT1G20960_3	250,	0,	4.62669	24.9104
Chr1	7317404	7317772	AT1G20970_1	37,113,	0,255,	3.08948	7.96912
Chr1	7318393	7319027	AT1G20970_2	356,141,	0,493,	9.11642	7.96912
Chr1	7319225	7319474	AT1G20970_3	249,	0,	10.5848	7.96912
Chr1	7325217	7325318	AT1G20980_1	101,	0,	1.5106	15.7142
Chr1	7328842	7329192	AT1G20980_2	350,	0,	8.10284	15.7142
Chr1	7337800	7338029	AT1G21000_1	125,23,	0,206,	3.33131	7.06679
Chr1	7373964	7374114	AT1G21060_1	150,	0,	6.62575	4.77224
Chr1	7375590	7375739	AT1G21065_1	149,	0,	5.00048	68.9302
Chr1	7376017	7376317	AT1G21070_1	300,	0,	5.50717	4.71742
Chr1	7384899	7385137	AT1G21090_1	108,39,	0,199,	2.09305	2.49641
Chr1	7385656	7385803	AT1G21090_2	147,	0,	3.42514	2.49641
Chr1	7408030	7408180	AT1G21160_1	150,	0,	5.15634	4.52026
Chr1	7410213	7410407	AT1G21160_2	3,97,	0,97,	3.43555	4.52026
Chr1	7411577	7411976	AT1G21160_3	399,	0,	8.07233	4.52026
Chr1	7412075	7412176	AT1G21160_4	101,	0,	2.21776	4.52026
Chr1	7413276	7413804	AT1G21170_1	193,7,	0,521,	4.38174	3.68807
Chr1	7419759	7419952	AT1G21190_1	193,	0,	5.87034	22.3455
Chr1	7422633	7422783	AT1G21200_1	150,	0,	2.93825	3.26916
Chr1	7439417	7439567	AT1G21250_1	150,	0,	4.19344	94.8718
Chr1	7453536	7454231	AT1G21310_1	31,553,	0,142,	7.84078	8.55022
Chr1	7454376	7454863	AT1G21310_2	487,	0,	9.06787	8.55022
Chr1	7476999	7477351	AT1G21350_1	127,20,	0,332,	10.3124	18.4271
Chr1	7485420	7485568	AT1G21370_1	148,	0,	7.15609	5.1492
Chr1	7496099	7496396	AT1G21400_1	297,	0,	7.96854	7.18686
Chr1	7511257	7511653	AT1G21450_1	396,	0,	3.94973	4.06553
Chr1	7529947	7530143	AT1G21500_1	196,	0,	2.95601	95.2752
Chr1	7534687	7534784	AT1G21520_1	97,	0,	3.24193	5.00205
Chr1	7556765	7557013	AT1G21560_1	248,	0,	11.997	6.79378
Chr1	7557238	7557687	AT1G21580_1	449,	0,	5.04681	6.3527
Chr1	7558083	7558183	AT1G21580_2	100,	0,	1.74411	6.3527
Chr1	7565317	7565666	AT1G21580_3	349,	0,	3.07467	6.3527
Chr1	7566425	7566624	AT1G21590_1	199,	0,	4.62871	24.9428
Chr1	7571188	7572180	AT1G21600_1	442,90,59,	0,553,933,	6.04155	72.1981
Chr1	7576183	7576333	AT1G21610_1	150,	0,	2.3878	5.42651
Chr1	7578614	7578913	AT1G21610_2	299,	0,	4.73886	5.42651
Chr1	7592640	7592890	AT1G21640_1	250,	0,	23.818	13.896
Chr1	7592713	7593012	AT1G21650_1	299,	0,	25.0382	4.05042
Chr1	7608878	7609026	AT1G21660_1	148,	0,	12.0966	13.903
Chr1	7618287	7618482	AT1G21690_1	195,	0,	18.3554	7.67627
Chr1	7620049	7620199	AT1G21700_1	150,	0,	7.59348	6.98342
Chr1	7620346	7620495	AT1G21700_2	149,	0,	6.9775	6.98342
Chr1	7623681	7624067	AT1G21700_3	143,105,	0,281,	3.51312	6.98342
Chr1	7628040	7628190	AT1G21720_1	150,	0,	8.69743	39.9755
Chr1	7634528	7634628	AT1G21730_1	100,	0,	1.83927	2.9259
Chr1	7635713	7635814	AT1G21730_2	101,	0,	2.59201	2.9259
Chr1	7644739	7644890	AT1G21740_2	151,	0,	2.45466	1.61051
Chr1	7648561	7648708	AT1G21750_1	147,	0,	7.58524	71.1626
Chr1	7651572	7651816	AT1G21760_1	244,	0,	5.56135	6.72792
Chr1	7652176	7652276	AT1G21780_1	100,	0,	2.58159	9.14619
Chr1	7653767	7654014	AT1G21780_2	247,	0,	6.61984	9.14619
Chr1	7655685	7655834	AT1G21790_1	149,	0,	10.0182	4.287
Chr1	7661623	7662386	AT1G21830_1	161,130,	0,633,	3.28889	4.00213
Chr1	7680633	7680731	AT1G21880_1	98,	0,	2.53609	13.7678
Chr1	7680828	7680975	AT1G21880_2	147,	0,	3.83851	13.7678
Chr1	7682445	7682592	AT1G21880_3	147,	0,	11.3899	13.7678
Chr1	7690950	7691200	AT1G21900_1	250,	0,	10.5776	22.5017
Chr1	7714217	7714411	AT1G21930_1	194,	0,	12.8646	10.9832
Chr1	7735451	7735896	AT1G21980_1	445,	0,	3.05454	7.3036
Chr1	7738376	7738624	AT1G21980_2	248,	0,	6.0937	7.3036
Chr1	7757140	7757338	AT1G22020_1	198,	0,	9.96096	5.81315
Chr1	7769616	7769766	AT1G22040_1	150,	0,	1.98731	4.2014
Chr1	7773162	7773411	AT1G22060_1	249,	0,	6.28089	5.74215
Chr1	7774810	7774910	AT1G22060_2	100,	0,	1.42999	5.74215
Chr1	7791839	7792089	AT1G22070_1	250,	0,	6.86205	12.4076
Chr1	7814757	7815092	AT1G22140_1	335,	0,	8.36448	12.6647
Chr1	7823208	7823305	AT1G22160_1	97,	0,	2.76729	9.84839
Chr1	7823683	7823828	AT1G22160_2	145,	0,	1.95722	9.84839
Chr1	7828375	7828525	AT1G22180_1	150,	0,	7.51027	2.18157
Chr1	7829236	7829427	AT1G22180_2	53,48,	0,143,	1.99893	2.18157
Chr1	7837659	7837855	AT1G22200_1	196,	0,	28.7271	14.6409
Chr1	7875380	7875822	AT1G22280_1	442,	0,	6.1691	15.4986
Chr1	7878807	7879225	AT1G22300_1	344,1,	0,417,	10.386	79.8701
Chr1	7880551	7881150	AT1G22300_2	133,114,	0,485,	4.35084	79.8701
Chr1	7888327	7889385	AT1G22330_1	296,251,	0,807,	4.94167	4.56999
Chr1	7895005	7895304	AT1G22360_1	299,	0,	4.98859	14.6412
Chr1	7898161	7898310	AT1G22370_1	149,	0,	3.5307	4.79504
Chr1	7903856	7904104	AT1G22400_1	248,	0,	5.7647	4.64802
Chr1	7904399	7904498	AT1G22400_2	99,	0,	1.39338	4.64802
Chr1	7914707	7914856	AT1G22410_1	149,	0,	13.5745	62.1578
Chr1	7921598	7921795	AT1G22430_1	197,	0,	12.8883	15.6205
Chr1	7926901	7927099	AT1G22450_1	198,	0,	8.61271	38.9717
Chr1	7953069	7953261	AT1G22520_1	192,	0,	12.7553	15.1047
Chr1	7955642	7955791	AT1G22530_1	149,	0,	5.12729	22.6445
Chr1	7957378	7957675	AT1G22530_2	297,	0,	3.44068	22.6445
Chr1	7957773	7958070	AT1G22530_3	297,	0,	3.53699	22.6445
Chr1	7966138	7966436	AT1G22540_1	298,	0,	8.07343	5.63995
Chr1	8003953	8004206	AT1G22630_1	20,127,	0,126,	1.93677	61.3977
Chr1	8013401	8013647	AT1G22650_1	246,	0,	4.62795	4.28466
Chr1	8021433	8021682	AT1G22660_1	249,	0,	10.614	2.9723
Chr1	8050494	8050688	AT1G22740_1	194,	0,	14.4685	6.94593
Chr1	8052632	8052881	AT1G22750_1	249,	0,	6.25223	17.1953
Chr1	8069161	8069259	AT1G22780_1	98,	0,	4.6395	121.918
Chr1	8071297	8071445	AT1G22790_1	148,	0,	9.84975	9.36764
Chr1	8074013	8074259	AT1G22800_1	246,	0,	8.92012	5.39297
Chr1	8080280	8080476	AT1G22840_1	196,	0,	19.0488	77.6539
Chr1	8080578	8080921	AT1G22850_1	140,7,	0,336,	3.08136	53.2149
Chr1	8082638	8082833	AT1G22850_2	195,	0,	5.55915	53.2149
Chr1	8099594	8099841	AT1G22882_1	247,	0,	5.0599	6.72976
Chr1	8100528	8100677	AT1G22882_2	149,	0,	3.36816	6.72976
Chr1	8100873	8101070	AT1G22882_3	197,	0,	8.0536	6.72976
Chr1	8101168	8101267	AT1G22882_4	99,	0,	3.40617	6.72976
Chr1	8103165	8103306	AT1G22890_1	141,	0,	2.89473	3.34146
Chr1	8105780	8105929	AT1G22910_2	149,	0,	2.36787	6.73452
Chr1	8107453	8107671	AT1G22910_3	70,79,	0,139,	2.23818	6.73452
Chr1	8107966	8108164	AT1G22910_4	198,	0,	9.97513	6.73452
Chr1	8109772	8109873	AT1G22920_1	101,	0,	10.9463	12.8236
Chr1	8121454	8121803	AT1G22930_1	349,	0,	7.07058	18.7469
Chr1	8121902	8122052	AT1G22930_2	150,	0,	7.88198	18.7469
Chr1	8124821	8124970	AT1G22940_1	149,	0,	3.91697	11.9187
Chr1	8125071	8125319	AT1G22950_1	248,	0,	9.32292	7.81433
Chr1	8127038	8127187	AT1G22950_2	149,	0,	2.88721	7.81433
Chr1	8128215	8128365	AT1G22960_2	150,	0,	1.78071	1.81925
Chr1	8130695	8130893	AT1G22970_1	198,	0,	2.63312	5.58307
Chr1	8150116	8150567	AT1G23020_1	210,139,	0,312,	3.03939	3.68435
Chr1	8150665	8151204	AT1G23020_2	416,32,	0,507,	4.16371	3.68435
Chr1	8180487	8180738	AT1G23080_1	251,	0,	6.44327	20.4199
Chr1	8183100	8183301	AT1G23080_2	201,	0,	2.20082	20.4199
Chr1	8183399	8183550	AT1G23080_3	151,	0,	3.83476	20.4199
Chr1	8219443	8219592	AT1G23180_1	149,	0,	6.7271	12.0934
Chr1	8224155	8224400	AT1G23190_1	245,	0,	14.0864	43.2462
Chr1	8234582	8234825	AT1G23205_1	243,	0,	4.82031	20.7964
Chr1	8244117	8244308	AT1G23220_1	191,	0,	12.1426	12.6911
Chr1	8251539	8251887	AT1G23230_1	348,	0,	10.0059	5.90029
Chr1	8257100	8257484	AT1G23260_1	164,34,	0,350,	4.51855	17.1223
Chr1	8260753	8261712	AT1G23280_1	165,122,118,141,38,	0,260,481,691,921,	2.50894	15.8334
Chr1	8268580	8268777	AT1G23310_1	197,	0,	8.72139	417.291
Chr1	8279653	8279953	AT1G23330_1	300,	0,	9.15033	3.84015
Chr1	8295225	8295422	AT1G23360_1	197,	0,	18.9406	13.1785
Chr1	8310476	8310575	AT1G23390_1	99,	0,	1.8397	15.4781
Chr1	8312083	8312284	AT1G23400_1	201,	0,	11.9627	18.1674
Chr1	8314527	8314678	AT1G23400_2	151,	0,	4.9515	18.1674
Chr1	8324000	8324199	AT1G23440_1	199,	0,	7.60265	5.69841
Chr1	8338434	8338582	AT1G23490_1	148,	0,	11.2536	144.512
Chr1	8346188	8346337	AT1G23530_1	149,	0,	1.914	2.22166
Chr1	8401216	8401455	AT1G23750_1	239,	0,	9.35832	5.79825
Chr1	8406859	8407105	AT1G23780_1	246,	0,	4.30712	10.869
Chr1	8422740	8422936	AT1G23820_1	196,	0,	11.7532	73.6745
Chr1	8427794	8428040	AT1G23860_2	246,	0,	17.9356	7.04407
Chr1	8447133	8447482	AT1G23900_1	349,	0,	16.1706	8.81913
Chr1	8469629	8469728	AT1G23950_1	99,	0,	14.7213	12.496
Chr1	8478490	8478740	AT1G23960_1	250,	0,	7.66278	12.4398
Chr1	8503826	8503975	AT1G24040_1	149,	0,	11.7025	7.66966
Chr1	8508566	8508811	AT1G24050_1	245,	0,	22.7246	36.3933
Chr1	8525481	8525826	AT1G24100_1	345,	0,	6.5856	39.0647
Chr1	8526791	8527038	AT1G24100_2	247,	0,	3.1007	39.0647
Chr1	8529213	8529513	AT1G24120_1	300,	0,	5.65736	19.4619
Chr1	8545340	8545491	AT1G24148_1	151,	0,	3.05201	7.13052
Chr1	8551536	8551687	AT1G24150_3	151,	0,	3.51473	2.99516
Chr1	8553460	8553608	AT1G24160_1	148,	0,	7.51267	13.5692
Chr1	8554632	8555180	AT1G24160_2	152,292,	0,256,	3.96664	13.5692
Chr1	8555327	8555426	AT1G24160_3	99,	0,	1.49521	13.5692
Chr1	8560565	8561107	AT1G24180_1	256,66,21,	0,373,521,	4.73148	23.5744
Chr1	8563658	8563958	AT1G24190_1	300,	0,	9.09453	5.10449
Chr1	8565418	8565618	AT1G24190_2	200,	0,	2.09639	5.10449
Chr1	8565716	8565817	AT1G24190_3	101,	0,	1.37292	5.10449
Chr1	8568817	8569017	AT1G24190_4	200,	0,	4.36333	5.10449
Chr1	8587934	8588131	AT1G24240_1	197,	0,	13.8766	7.07325
Chr1	8604168	8604414	AT1G24267_1	246,	0,	15.9449	13.5662
Chr1	8607287	8607386	AT1G24267_2	99,	0,	4.43667	13.5662
Chr1	8614412	8614760	AT1G24300_1	348,	0,	5.17568	7.3045
Chr1	8620415	8620565	AT1G24300_2	150,	0,	3.26398	7.3045
Chr1	8624162	8624510	AT1G24310_1	348,	0,	3.05812	8.03615
Chr1	8626107	8626405	AT1G24310_2	298,	0,	10.6947	8.03615
Chr1	8638688	8638986	AT1G24340_1	298,	0,	14.3842	3.18264
Chr1	8638665	8638811	AT1G24350_1	146,	0,	3.8577	4.13298
Chr1	8638907	8639102	AT1G24350_2	195,	0,	12.9251	4.13298
Chr1	8640225	8640323	AT1G24350_3	98,	0,	2.18899	4.13298
Chr1	8643258	8643405	AT1G24360_1	147,	0,	15.0115	69.1985
Chr1	8665080	8665227	AT1G24450_1	147,	0,	7.12763	4.97317
Chr1	8668809	8668909	AT1G24460_1	100,	0,	1.50138	6.95429
Chr1	8671453	8671654	AT1G24460_2	201,	0,	2.18482	6.95429
Chr1	8672111	8672651	AT1G24460_3	34,416,	0,124,	7.81511	6.95429
Chr1	8682293	8682491	AT1G24490_1	198,	0,	4.13686	12.4429
Chr1	8684550	8684778	AT1G24490_2	33,116,	0,112,	2.69446	12.4429
Chr1	8684925	8685222	AT1G24490_3	297,	0,	7.79026	12.4429
Chr1	8685370	8685571	AT1G24510_1	201,	0,	12.519	51.1431
Chr1	8703344	8703443	AT1G24560_1	99,	0,	3.71418	8.84739
Chr1	8704680	8705436	AT1G24560_2	32,117,147,	0,160,609,	3.34435	8.84739
Chr1	8705534	8705830	AT1G24560_3	296,	0,	4.52061	8.84739
Chr1	8720700	8721001	AT1G24610_1	301,	0,	6.61144	13.0887
Chr1	8727016	8727163	AT1G24625_1	147,	0,	4.37655	10.7578
Chr1	8753871	8754121	AT1G24706_1	250,	0,	1.80331	5.99848
Chr1	8754368	8754858	AT1G24706_2	107,143,	0,347,	3.4138	5.99848
Chr1	8754956	8755057	AT1G24706_3	101,	0,	3.31366	5.99848
Chr1	8755205	8755554	AT1G24706_4	349,	0,	19.6199	5.99848
Chr1	8759630	8759976	AT1G24764_1	346,	0,	8.97028	11.0124
Chr1	8760191	8760339	AT1G24764_2	148,	0,	2.49713	11.0124
Chr1	8837233	8837533	AT1G25220_1	300,	0,	4.36755	13.0577
Chr1	8840445	8840543	AT1G25230_1	98,	0,	6.69563	5.43306
Chr1	8854031	8854181	AT1G25260_1	150,	0,	15.5102	20.5907
Chr1	8865946	8866196	AT1G25280_1	250,	0,	2.35307	9.3806
Chr1	8866544	8866794	AT1G25280_2	250,	0,	4.69089	9.3806
Chr1	8868947	8869143	AT1G25290_1	196,	0,	7.89706	7.13189
Chr1	8889167	8889317	AT1G25350_1	150,	0,	9.46358	15.5705
Chr1	8905654	8906005	AT1G25380_1	351,	0,	8.95158	8.19734
Chr1	8911428	8911629	AT1G25400_1	201,	0,	1.80724	1.45389
Chr1	8917969	8918218	AT1G25420_1	249,	0,	14.7194	8.72947
Chr1	8934501	8934602	AT1G25440_1	101,	0,	2.94943	137.299
Chr1	8939977	8940271	AT1G25450_1	294,	0,	2.77541	13.4873
Chr1	8964319	8964466	AT1G25520_1	147,	0,	19.3403	7.23191
Chr1	8969607	8969854	AT1G25540_2	247,	0,	8.52991	4.20523
Chr1	8991857	8992258	AT1G25570_1	401,	0,	4.99712	9.7417
Chr1	8995188	8995467	AT1G25570_2	85,116,	0,163,	4.75022	9.7417
Chr1	8996811	8997058	AT1G25580_1	247,	0,	11.3533	5.94524
Chr1	8997489	8997589	AT1G25580_2	100,	0,	2.47353	5.94524
Chr1	9002383	9002633	AT1G25682_1	250,	0,	9.4467	6.14442
Chr1	9022568	9022769	AT1G26090_1	201,	0,	8.17063	6.86028
Chr1	9022590	9022738	AT1G26100_1	148,	0,	9.55853	6.11071
Chr1	9024390	9024688	AT1G26110_1	298,	0,	5.46107	47.1494
Chr1	9026241	9026490	AT1G26110_2	249,	0,	1.84947	47.1494
Chr1	9028425	9028625	AT1G26120_1	200,	0,	21.1738	5.12465
Chr1	9034281	9034382	AT1G26130_1	101,	0,	2.44731	3.01691
Chr1	9039727	9039877	AT1G26150_1	150,	0,	19.4348	11.0269
Chr1	9041962	9042411	AT1G26150_2	449,	0,	10.0478	11.0269
Chr1	9042509	9042759	AT1G26150_3	250,	0,	7.88289	11.0269
Chr1	9044567	9044762	AT1G26160_1	195,	0,	8.04375	14.5291
Chr1	9056595	9056842	AT1G26180_1	247,	0,	10.4401	9.70012
Chr1	9067816	9067963	AT1G26210_1	147,	0,	2.81862	10.3908
Chr1	9071187	9071284	AT1G26220_1	97,	0,	3.26597	26.1051
Chr1	9072304	9072551	AT1G26230_1	247,	0,	7.30181	12.5565
Chr1	9072826	9072989	AT1G26230_2	113,36,	0,127,	1.68921	12.5565
Chr1	9087685	9087907	AT1G26260_1	77,72,	0,150,	4.0066	1.79396
Chr1	9089567	9089913	AT1G26270_1	346,	0,	1.93536	19.1286
Chr1	9090011	9090258	AT1G26270_2	247,	0,	3.3725	19.1286
Chr1	9095816	9096065	AT1G26300_1	249,	0,	9.73033	3.05486
Chr1	9114692	9114882	AT1G26340_1	190,	0,	10.171	6.88137
Chr1	9144034	9144134	AT1G26440_1	100,	0,	2.28314	3.69405
Chr1	9144852	9145024	AT1G26440_2	69,30,	0,142,	2.33523	3.69405
Chr1	9151776	9152075	AT1G26460_1	299,	0,	6.96795	12.3016
Chr1	9154314	9154712	AT1G26460_2	398,	0,	7.82646	12.3016
Chr1	9163259	9163636	AT1G26520_1	244,51,	0,326,	5.02116	2.51578
Chr1	9165181	9165280	AT1G26520_2	99,	0,	2.21937	2.51578
Chr1	9172735	9172885	AT1G26550_1	150,	0,	25.314	78.2687
Chr1	9181620	9181720	AT1G26560_1	100,	0,	4.8609	9.05262
Chr1	9186837	9186986	AT1G26580_1	149,	0,	2.26169	12.2519
Chr1	9187182	9187430	AT1G26580_2	248,	0,	5.74923	12.2519
Chr1	9207070	9207269	AT1G26630_1	199,	0,	4.66782	336.664
Chr1	9207431	9207677	AT1G26640_1	246,	0,	17.864	10.9307
Chr1	9217765	9217913	AT1G26670_1	148,	0,	15.2504	24.3622
Chr1	9245027	9245263	AT1G26740_1	236,	0,	15.0208	14.0417
Chr1	9250285	9250629	AT1G26761_1	344,	0,	3.0533	11.2368
Chr1	9285660	9285808	AT1G26800_1	148,	0,	2.10881	3.46537
Chr1	9298082	9298480	AT1G26830_1	398,	0,	3.95962	12.3506
Chr1	9300954	9301154	AT1G26850_1	200,	0,	7.91298	57.1666
Chr1	9303880	9304080	AT1G26850_2	200,	0,	4.0894	57.1666
Chr1	9315403	9315653	AT1G26880_1	250,	0,	10.4708	49.8043
Chr1	9322828	9322928	AT1G26910_1	100,	0,	6.39658	9.15008
Chr1	9329687	9329785	AT1G26920_1	98,	0,	2.79103	7.9787
Chr1	9344844	9345176	AT1G26940_1	10,235,	0,97,	9.38767	6.96323
Chr1	9351399	9351591	AT1G26945_1	192,	0,	3.35712	4.46218
Chr1	9376305	9376683	AT1G27000_1	9,283,	0,95,	19.6659	25.606
Chr1	9396525	9396673	AT1G27060_1	148,	0,	8.46151	2.69649
Chr1	9407282	9407530	AT1G27100_1	248,	0,	3.20841	13.5565
Chr1	9422196	9422495	AT1G27120_1	48,152,	0,147,	6.36794	6.60956
Chr1	9431879	9432212	AT1G27150_1	16,231,	0,102,	11.046	6.3926
Chr1	9481895	9481994	AT1G27290_1	99,	0,	2.04817	9.45084
Chr1	9482647	9482845	AT1G27290_2	198,	0,	4.62474	9.45084
Chr1	9483305	9483405	AT1G27300_1	100,	0,	2.09793	5.41978
Chr1	9484268	9484368	AT1G27300_2	100,	0,	11.6639	5.41978
Chr1	9484364	9484609	AT1G27310_1	245,	0,	10.2077	47.8112
Chr1	9487235	9487385	AT1G27320_1	150,	0,	3.70828	15.8515
Chr1	9491655	9491893	AT1G27320_2	18,131,	0,107,	2.26274	15.8515
Chr1	9492091	9492533	AT1G27320_3	10,338,	0,104,	10.9143	15.8515
Chr1	9493905	9494049	AT1G27330_1	144,	0,	3.0339	39.767
Chr1	9497936	9498036	AT1G27340_1	100,	0,	14.4145	16.5613
Chr1	9498142	9498287	AT1G27350_1	145,	0,	10.8605	26.055
Chr1	9503624	9503824	AT1G27360_1	200,	0,	6.3337	4.86082
Chr1	9511000	9511149	AT1G27385_1	149,	0,	12.7852	16.5178
Chr1	9513177	9513469	AT1G27390_1	292,	0,	8.59818	16.0654
Chr1	9516525	9516822	AT1G27400_1	54,145,	0,152,	6.21427	95.6032
Chr1	9520924	9521273	AT1G27430_1	349,	0,	6.07993	7.41205
Chr1	9527691	9527931	AT1G27435_1	240,	0,	4.77596	20.6003
Chr1	9532103	9532251	AT1G27450_1	148,	0,	3.16306	77.9516
Chr1	9533654	9534043	AT1G27450_2	3,293,	0,96,	5.45149	77.9516
Chr1	9537365	9537515	AT1G27460_1	150,	0,	9.6568	6.78721
Chr1	9545942	9546187	AT1G27480_1	245,	0,	4.063	35.2912
Chr1	9554807	9555005	AT1G27510_1	198,	0,	16.4259	16.6497
Chr1	9562042	9562289	AT1G27520_1	247,	0,	16.5711	7.00076
Chr1	9562635	9562784	AT1G27530_1	149,	0,	22.3753	31.2144
Chr1	9597547	9597904	AT1G27595_1	157,42,	0,315,	3.1723	4.3308
Chr1	9603580	9603777	AT1G27600_1	197,	0,	5.17604	10.4202
Chr1	9614039	9614237	AT1G27630_1	198,	0,	11.5146	8.64663
Chr1	9615787	9616279	AT1G27650_1	492,	0,	4.16403	20.233
Chr1	9634222	9634547	AT1G27680_1	51,199,	0,126,	3.77592	9.47717
Chr1	9638204	9638503	AT1G27690_1	299,	0,	8.21512	4.51989
Chr1	9639956	9640105	AT1G27695_1	149,	0,	10.2161	4.15823
Chr1	9639957	9640401	AT1G27700_1	444,	0,	9.15078	6.75451
Chr1	9660564	9660962	AT1G27750_1	398,	0,	4.00177	4.3438
Chr1	9667002	9667451	AT1G27752_1	449,	0,	9.80875	7.88046
Chr1	9668656	9668856	AT1G27760_1	200,	0,	3.85218	16.808
Chr1	9671681	9671880	AT1G27770_1	199,	0,	7.4381	12.916
Chr1	9693105	9693509	AT1G27840_1	271,26,	0,378,	5.75014	5.42892
Chr1	9698496	9698596	AT1G27850_1	100,	0,	2.28162	6.61429
Chr1	9703447	9703944	AT1G27850_2	497,	0,	5.73306	6.61429
Chr1	9715538	9715736	AT1G27900_1	198,	0,	18.1543	5.14462
Chr1	9731406	9731507	AT1G27930_1	101,	0,	1.95891	14.845
Chr1	9732352	9732502	AT1G27930_2	150,	0,	4.48572	14.845
Chr1	9746805	9746951	AT1G27970_1	146,	0,	2.75019	32.9537
Chr1	9747822	9748017	AT1G27970_2	195,	0,	7.41401	32.9537
Chr1	9752569	9752719	AT1G27980_1	150,	0,	10.7026	3.00758
Chr1	9775571	9775770	AT1G28050_1	199,	0,	6.41828	15.1282
Chr1	9776952	9777101	AT1G28050_2	149,	0,	1.76861	15.1282
Chr1	9779317	9779566	AT1G28060_1	249,	0,	7.79178	9.10573
Chr1	9782062	9782609	AT1G28060_2	547,	0,	10.4912	9.10573
Chr1	9798581	9799017	AT1G28090_1	22,324,	0,112,	11.6001	5.53439
Chr1	9803810	9804196	AT1G28100_1	282,66,	0,320,	6.03434	2.84865
Chr1	9803689	9804181	AT1G28110_1	492,	0,	5.31522	5.3088
Chr1	9806751	9806850	AT1G28110_2	99,	0,	2.27333	5.3088
Chr1	9813027	9813356	AT1G28120_1	215,32,	0,297,	9.92976	11.9561
Chr1	9832810	9833056	AT1G28140_1	246,	0,	10.2669	33.795
Chr1	9834934	9835178	AT1G28150_1	244,	0,	5.18333	16.8206
Chr1	9847136	9847332	AT1G28190_1	196,	0,	3.61489	1.64774
Chr1	9850237	9850386	AT1G28200_1	149,	0,	5.31993	10.5899
Chr1	9852152	9852301	AT1G28200_2	149,	0,	3.35113	10.5899
Chr1	9875293	9875531	AT1G28250_1	238,	0,	10.3398	7.05343
Chr1	9886537	9886686	AT1G28280_2	149,	0,	2.34185	7.19228
Chr1	9886933	9887330	AT1G28280_3	397,	0,	3.23497	7.19228
Chr1	9890224	9890324	AT1G28290_1	100,	0,	5.26684	53.5984
Chr1	9890422	9890719	AT1G28290_2	297,	0,	6.08246	53.5984
Chr1	9913068	9913166	AT1G28310_1	98,	0,	2.69952	2.85485
Chr1	9913360	9913458	AT1G28310_2	98,	0,	2.10339	2.85485
Chr1	9933980	9934177	AT1G28330_1	197,	0,	2.11213	13.6055
Chr1	9943271	9943567	AT1G28340_1	296,	0,	13.5695	15.4927
Chr1	9949586	9949785	AT1G28350_1	199,	0,	16.0226	8.23737
Chr1	9963647	9963747	AT1G28380_1	100,	0,	4.59693	12.7577
Chr1	9966020	9966220	AT1G28380_2	200,	0,	4.46073	12.7577
Chr1	9967016	9967215	AT1G28390_1	199,	0,	2.31559	2.21514
Chr1	9969395	9969645	AT1G28395_1	250,	0,	8.75846	8.21054
Chr1	9973014	9973747	AT1G28400_1	733,	0,	4.87707	12.2891
Chr1	9981524	9982205	AT1G28420_1	13,90,165,81,	0,105,309,600,	7.62002	6.15743
Chr1	9986893	9987638	AT1G28420_2	745,	0,	4.83444	6.15743
Chr1	10013723	10013918	AT1G28480_1	195,	0,	2.9821	1.57181
Chr1	10017207	10017999	AT1G28490_1	59,91,66,268,	0,204,380,524,	4.19452	10.8921
Chr1	10025193	10025830	AT1G28510_1	41,56,	0,581,	1.74458	15.881
Chr1	10026021	10026263	AT1G28510_2	242,	0,	22.0942	15.881
Chr1	10031253	10031892	AT1G28520_1	639,	0,	5.67778	7.08683
Chr1	10036755	10036955	AT1G28540_1	200,	0,	19.9811	2.92485
Chr1	10044435	10044633	AT1G28580_1	198,	0,	6.50928	11.7824
Chr1	10051151	10051298	AT1G28600_1	147,	0,	2.50548	25.2689
Chr1	10053637	10053883	AT1G28610_1	246,	0,	11.3517	6.49817
Chr1	10071756	10071855	AT1G28660_1	99,	0,	3.15647	4.62597
Chr1	10072230	10072329	AT1G28660_2	99,	0,	2.00283	4.62597
Chr1	10074555	10074703	AT1G28670_1	148,	0,	3.1413	12.4634
Chr1	10075027	10075126	AT1G28670_2	99,	0,	1.82206	12.4634
Chr1	10078237	10078485	AT1G28680_1	248,	0,	4.18817	11.6199
Chr1	10079760	10079909	AT1G28680_2	149,	0,	1.66225	11.6199
Chr1	10109599	10109750	AT1G28960_1	151,	0,	4.41622	6.47043
Chr1	10110048	10110199	AT1G28960_2	151,	0,	3.36236	6.47043
Chr1	10129098	10129298	AT1G29030_1	200,	0,	5.94436	3.75564
Chr1	10135093	10135339	AT1G29040_1	246,	0,	7.75381	8.55498
Chr1	10136294	10136393	AT1G29050_1	99,	0,	6.48733	7.77871
Chr1	10149388	10149633	AT1G29060_1	245,	0,	12.3914	3.21186
Chr1	10151165	10151311	AT1G29070_1	146,	0,	10.1636	243.909
Chr1	10178174	10178422	AT1G29120_1	248,	0,	7.0317	10.6253
Chr1	10182512	10182611	AT1G29150_1	99,	0,	10.1576	34.8159
Chr1	10190186	10190663	AT1G29170_1	216,134,	0,343,	5.08373	2.76537
Chr1	10192531	10192682	AT1G29170_2	151,	0,	4.44301	2.76537
Chr1	10210567	10210665	AT1G29220_1	98,	0,	14.7587	9.84956
Chr1	10212383	10212481	AT1G29220_2	98,	0,	6.24666	9.84956
Chr1	10216828	10216978	AT1G29240_1	150,	0,	18.5544	4.76038
Chr1	10217214	10217315	AT1G29240_2	101,	0,	1.81331	4.76038
Chr1	10223315	10223465	AT1G29250_1	150,	0,	15.4008	33.4944
Chr1	10225883	10226030	AT1G29260_1	147,	0,	8.89008	9.7807
Chr1	10247906	10248056	AT1G29300_1	150,	0,	2.76835	2.77908
Chr1	10254443	10254643	AT1G29310_1	200,	0,	12.6116	16.0852
Chr1	10257999	10258343	AT1G29320_1	344,	0,	10.8057	7.02606
Chr1	10258296	10258724	AT1G29330_1	320,20,	0,408,	16.6923	2.32122
Chr1	10277846	10278093	AT1G29370_1	247,	0,	12.5188	4.48909
Chr1	10286263	10286460	AT1G29390_1	197,	0,	12.8625	42.1458
Chr1	10288274	10288372	AT1G29395_1	98,	0,	2.45518	76.4549
Chr1	10303172	10303271	AT1G29430_1	99,	0,	3.1552	2.17798
Chr1	10324893	10324993	AT1G29530_1	100,	0,	5.1052	17.6931
Chr1	10326241	10326749	AT1G29530_2	25,174,	0,334,	2.32973	17.6931
Chr1	10332077	10332276	AT1G29550_1	199,	0,	6.05477	6.00287
Chr1	10379068	10379365	AT1G29690_1	297,	0,	7.76088	3.82954
Chr1	10385043	10385384	AT1G29700_1	245,5,	0,336,	13.6126	17.3335
Chr1	10386745	10386944	AT1G29700_2	199,	0,	2.67842	17.3335
Chr1	10393758	10394059	AT1G29720_1	301,	0,	10.2437	10.8917
Chr1	10395447	10395548	AT1G29720_2	101,	0,	2.08447	10.8917
Chr1	10430059	10430500	AT1G29790_1	441,	0,	4.96354	7.62306
Chr1	10431731	10431927	AT1G29790_2	196,	0,	6.37187	7.62306
Chr1	10435422	10435617	AT1G29810_1	195,	0,	6.75718	5.32755
Chr1	10449674	10449822	AT1G29850_1	148,	0,	30.513	26.718
Chr1	10459555	10459705	AT1G29880_1	150,	0,	12.4173	42.7477
Chr1	10462619	10462719	AT1G29880_2	100,	0,	3.7191	42.7477
Chr1	10467002	10467302	AT1G29890_1	300,	0,	16.4508	7.88053
Chr1	10468252	10468401	AT1G29900_1	149,	0,	4.18129	33.7627
Chr1	10471913	10472162	AT1G29900_2	249,	0,	5.42096	33.7627
Chr1	10479154	10479403	AT1G29940_1	249,	0,	6.95938	5.94789
Chr1	10486675	10486775	AT1G29940_2	100,	0,	2.65841	5.94789
Chr1	10495963	10496157	AT1G29960_1	194,	0,	7.88975	3.09175
Chr1	10498399	10498499	AT1G29970_1	100,	0,	7.29017	4.84619
Chr1	10499159	10499604	AT1G29970_2	85,14,	0,431,	1.77586	4.84619
Chr1	10503338	10503439	AT1G29980_1	101,	0,	3.45409	10.3592
Chr1	10508913	10509056	AT1G29990_1	143,	0,	16.1045	20.5064
Chr1	10509255	10509605	AT1G30000_1	350,	0,	18.0229	6.31863
Chr1	10546658	10547218	AT1G30070_1	237,81,78,	0,332,482,	6.31791	7.17412
Chr1	10583609	10583758	AT1G30110_1	149,	0,	1.94922	2.66564
Chr1	10584251	10584350	AT1G30120_1	99,	0,	3.28903	50.8912
Chr1	10587667	10587914	AT1G30130_1	247,	0,	2.83685	4.71252
Chr1	10625099	10625299	AT1G30200_1	200,	0,	4.73659	11.2728
Chr1	10626885	10627085	AT1G30200_2	200,	0,	5.16114	11.2728
Chr1	10627233	10627380	AT1G30210_1	147,	0,	10.8988	17.0781
Chr1	10628858	10629054	AT1G30210_2	196,	0,	2.75482	17.0781
Chr1	10640541	10640692	AT1G30230_1	151,	0,	8.9408	141.428
Chr1	10647411	10647602	AT1G30250_1	191,	0,	2.61842	10.7113
Chr1	10663335	10663881	AT1G30280_1	546,	0,	3.77534	9.47261
Chr1	10671059	10671159	AT1G30290_1	100,	0,	1.37069	2.13345
Chr1	10682176	10682488	AT1G30320_1	168,31,	0,281,	4.44871	5.00802
Chr1	10682789	10682988	AT1G30320_2	199,	0,	6.55158	5.00802
Chr1	10687126	10687623	AT1G30330_2	497,	0,	2.56883	12.4068
Chr1	10690591	10690790	AT1G30330_3	199,	0,	2.65836	12.4068
Chr1	10734345	10734446	AT1G30400_1	101,	0,	1.71208	15.9446
Chr1	10737451	10737892	AT1G30400_2	57,293,	0,148,	13.3773	15.9446
Chr1	10761836	10761985	AT1G30440_1	149,	0,	3.09645	16.2693
Chr1	10762231	10762330	AT1G30440_2	99,	0,	3.75602	16.2693
Chr1	10771307	10771704	AT1G30460_1	397,	0,	5.97621	4.89548
Chr1	10772050	10772200	AT1G30460_2	150,	0,	5.12407	4.89548
Chr1	10774559	10774709	AT1G30460_3	150,	0,	1.9165	4.89548
Chr1	10786398	10786548	AT1G30470_1	150,	0,	9.22183	13.5592
Chr1	10790412	10790510	AT1G30480_1	98,	0,	1.84525	5.78082
Chr1	10790656	10791096	AT1G30480_2	440,	0,	5.921	5.78082
Chr1	10792382	10792578	AT1G30480_3	196,	0,	6.82703	5.78082
Chr1	10796222	10796323	AT1G30490_1	101,	0,	10.9006	7.14176
Chr1	10807126	10807372	AT1G30510_1	246,	0,	1.92998	7.66165
Chr1	10813430	10813630	AT1G30520_1	200,	0,	6.1497	10.1087
Chr1	10814953	10815052	AT1G30530_1	99,	0,	2.77796	56.239
Chr1	10816125	10816224	AT1G30530_2	99,	0,	1.55554	56.239
Chr1	10816812	10816960	AT1G30540_1	148,	0,	10.8992	5.6881
Chr1	10831722	10831922	AT1G30580_1	200,	0,	11.9051	67.5628
Chr1	10835834	10836034	AT1G30590_1	200,	0,	15.8528	8.33627
Chr1	10840273	10840374	AT1G30590_2	101,	0,	3.15472	8.33627
Chr1	10847011	10847211	AT1G30610_1	200,	0,	4.52836	6.2399
Chr1	10847559	10847909	AT1G30610_2	350,	0,	1.98533	6.2399
Chr1	10850374	10850574	AT1G30610_3	200,	0,	7.25124	6.2399
Chr1	10858330	10858580	AT1G30630_1	250,	0,	9.76925	47.5567
Chr1	10886074	10886422	AT1G30680_1	348,	0,	15.2726	12.4632
Chr1	10888580	10888880	AT1G30690_1	300,	0,	2.2148	30.2897
Chr1	10938002	10938250	AT1G30810_1	248,	0,	10.4635	4.36235
Chr1	10962847	10963182	AT1G30825_1	30,219,	0,116,	8.79188	4.93649
Chr1	10993148	10993442	AT1G30880_1	294,	0,	5.55703	20.949
Chr1	10994004	10994103	AT1G30880_2	99,	0,	1.66234	20.949
Chr1	10995974	10996124	AT1G30890_1	150,	0,	15.7788	8.22143
Chr1	11002682	11002930	AT1G30910_1	248,	0,	18.9886	16.3812
Chr1	11040348	11040644	AT1G30970_1	296,	0,	7.77945	7.22633
Chr1	11041687	11041984	AT1G30970_2	297,	0,	2.19414	7.22633
Chr1	11043526	11043674	AT1G30970_3	148,	0,	1.99308	7.22633
Chr1	11054827	11055199	AT1G31010_1	242,51,	0,321,	5.76753	2.86031
Chr1	11058604	11058893	AT1G31020_1	289,	0,	7.83653	5.69924
Chr1	11084865	11085015	AT1G31070_1	150,	0,	2.5012	9.28603
Chr1	11088338	11088539	AT1G31070_2	201,	0,	7.51112	9.28603
Chr1	11104335	11104682	AT1G31120_1	347,	0,	3.75883	2.6767
Chr1	11115613	11116001	AT1G31130_1	388,	0,	5.54178	15.4216
Chr1	11121556	11121705	AT1G31150_1	149,	0,	1.6336	3.12583
Chr1	11134102	11134440	AT1G31170_1	23,228,	0,110,	6.98082	14.9427
Chr1	11142759	11142860	AT1G31180_1	101,	0,	7.78604	39.3748
Chr1	11146731	11146881	AT1G31190_1	150,	0,	10.4926	33.9031
Chr1	11147018	11147260	AT1G31200_1	242,	0,	7.21151	3.06383
Chr1	11158339	11158438	AT1G31220_1	99,	0,	4.85609	7.03812
Chr1	11158535	11158683	AT1G31220_2	148,	0,	20.6264	7.03812
Chr1	11158667	11158817	AT1G31230_1	150,	0,	7.41696	31.0332
Chr1	11158916	11159112	AT1G31230_2	73,27,	0,169,	2.22937	31.0332
Chr1	11193721	11193868	AT1G31300_1	147,	0,	2.35992	10.227
Chr1	11195958	11196251	AT1G31300_2	293,	0,	20.5276	10.227
Chr1	11215803	11215949	AT1G31330_1	146,	0,	4.68687	1011.63
Chr1	11217054	11217153	AT1G31335_1	99,	0,	1.55146	5.06991
Chr1	11217933	11218125	AT1G31340_1	192,	0,	12.4777	32.0415
Chr1	11218735	11218831	AT1G31340_2	96,	0,	1.69334	32.0415
Chr1	11219330	11219427	AT1G31340_3	97,	0,	1.94191	32.0415
Chr1	11221654	11221902	AT1G31350_1	248,	0,	4.29717	6.96992
Chr1	11222246	11222395	AT1G31350_2	149,	0,	1.97632	6.96992
Chr1	11246916	11247216	AT1G31410_1	300,	0,	13.0707	12.7338
Chr1	11253466	11253616	AT1G31420_1	150,	0,	2.07893	36.6004
Chr1	11253715	11253815	AT1G31420_2	100,	0,	17.5727	36.6004
Chr1	11256603	11256752	AT1G31440_2	149,	0,	3.3972	11.8389
Chr1	11273671	11273870	AT1G31500_1	199,	0,	12.7401	8.98322
Chr1	11288725	11289120	AT1G31540_2	26,274,	0,121,	2.79605	5.76104
Chr1	11291143	11291393	AT1G31540_4	250,	0,	4.68661	5.76104
Chr1	11313158	11313527	AT1G31600_1	280,19,	0,350,	8.71482	5.58922
Chr1	11326350	11326450	AT1G31650_1	100,	0,	11.3666	10.5864
Chr1	11349892	11350089	AT1G31710_1	197,	0,	5.19289	5.58418
Chr1	11355243	11355391	AT1G31710_2	148,	0,	4.55979	5.58418
Chr1	11393956	11394303	AT1G31780_1	57,191,	0,156,	3.35305	12.2208
Chr1	11394500	11394649	AT1G31780_2	149,	0,	7.40428	12.2208
Chr1	11399417	11399714	AT1G31800_1	297,	0,	16.4765	72.785
Chr1	11399656	11400055	AT1G31810_1	399,	0,	10.9987	5.18274
Chr1	11410960	11411155	AT1G31812_1	195,	0,	8.71417	222.497
Chr1	11433464	11433565	AT1G31850_1	101,	0,	6.49686	24.0024
Chr1	11434157	11434305	AT1G31860_1	148,	0,	5.41544	13.2406
Chr1	11437328	11437428	AT1G31870_1	100,	0,	1.63268	5.53745
Chr1	11438437	11439145	AT1G31870_2	59,68,65,56,	0,336,492,652,	2.13396	5.53745
Chr1	11439630	11440077	AT1G31870_3	6,342,	0,105,	10.8857	5.53745
Chr1	11461601	11461802	AT1G31910_1	201,	0,	12.6634	26.4469
Chr1	11462000	11462151	AT1G31910_2	151,	0,	2.38408	26.4469
Chr1	11466228	11466479	AT1G31930_1	251,	0,	4.78241	5.63014
Chr1	11468508	11468658	AT1G31930_2	150,	0,	1.82807	5.63014
Chr1	11468857	11469107	AT1G31930_3	250,	0,	5.58938	5.63014
Chr1	11470105	11470304	AT1G31940_1	199,	0,	9.25545	10.3419
Chr1	11479957	11480252	AT1G31970_1	295,	0,	9.33811	31.5522
Chr1	11482694	11482841	AT1G31970_2	147,	0,	12.8719	31.5522
Chr1	11531011	11531253	AT1G32050_1	242,	0,	14.6038	51.8371
Chr1	11532645	11532845	AT1G32060_1	200,	0,	4.35549	641.576
Chr1	11534439	11534589	AT1G32060_2	150,	0,	6.06088	641.576
Chr1	11534752	11534850	AT1G32070_1	98,	0,	6.67234	36.7397
Chr1	11536122	11536291	AT1G32070_2	55,43,	0,126,	6.10983	36.7397
Chr1	11537388	11537585	AT1G32080_1	197,	0,	5.7898	210.673
Chr1	11540092	11540293	AT1G32090_1	201,	0,	9.44979	7.07478
Chr1	11540441	11540542	AT1G32090_2	101,	0,	3.60771	7.07478
Chr1	11554417	11554568	AT1G32120_3	151,	0,	2.09359	1.6365
Chr1	11558903	11559053	AT1G32130_1	150,	0,	5.05354	25.4375
Chr1	11560675	11560775	AT1G32130_2	100,	0,	1.83034	25.4375
Chr1	11561092	11561341	AT1G32130_3	249,	0,	7.70205	25.4375
Chr1	11567870	11568063	AT1G32150_1	39,60,	0,133,	2.38308	3.62441
Chr1	11568303	11568499	AT1G32150_2	196,	0,	10.1718	3.62441
Chr1	11570242	11570340	AT1G32160_1	98,	0,	13.4224	28.5337
Chr1	11601866	11602014	AT1G32200_1	148,	0,	24.2844	27.9778
Chr1	11602110	11602307	AT1G32200_2	197,	0,	7.81229	27.9778
Chr1	11605752	11606046	AT1G32210_1	294,	0,	18.5918	14.7253
Chr1	11609580	11609678	AT1G32220_1	98,	0,	6.77891	38.0368
Chr1	11615884	11616182	AT1G32230_1	298,	0,	6.82538	27.0408
Chr1	11640653	11640751	AT1G32260_1	98,	0,	5.868	6.04039
Chr1	11641039	11641136	AT1G32260_2	97,	0,	1.76885	6.04039
Chr1	11654546	11654738	AT1G32310_1	192,	0,	16.2456	6.68731
Chr1	11673958	11674108	AT1G32360_1	150,	0,	2.78633	9.96045
Chr1	11674939	11675039	AT1G32360_2	100,	0,	1.82856	9.96045
Chr1	11675138	11675288	AT1G32360_3	150,	0,	7.44476	9.96045
Chr1	11681831	11681930	AT1G32380_1	99,	0,	2.16938	5.2106
Chr1	11684176	11684422	AT1G32380_2	246,	0,	17.8145	5.2106
Chr1	11689162	11689411	AT1G32400_1	249,	0,	8.94049	26.7852
Chr1	11695241	11695480	AT1G32410_1	239,	0,	9.5146	11.4159
Chr1	11738258	11738903	AT1G32460_1	34,61,	0,584,	2.23446	10.4929
Chr1	11739352	11739499	AT1G32470_1	147,	0,	4.51615	467.592
Chr1	11742104	11742402	AT1G32490_1	298,	0,	12.7228	6.51119
Chr1	11746762	11748727	AT1G32490_2	1,64,72,60,55,34,87,66,107,	0,100,392,555,917,1094,1461,1690,1858,	4.83924	6.51119
Chr1	11749895	11750044	AT1G32500_1	149,	0,	18.8775	42.3021
Chr1	11759972	11760906	AT1G32530_2	209,140,	0,794,	3.34198	8.37565
Chr1	11761004	11761303	AT1G32530_3	299,	0,	2.41928	8.37565
Chr1	11769751	11769851	AT1G32540_2	100,	0,	3.74959	2.76237
Chr1	11771814	11772488	AT1G32550_1	199,45,	0,629,	16.1028	36.2867
Chr1	11784133	11784233	AT1G32580_1	100,	0,	3.781	20.996
Chr1	11785358	11785655	AT1G32580_2	297,	0,	8.0219	20.996
Chr1	11827507	11827607	AT1G32700_1	100,	0,	3.04221	6.3764
Chr1	11829435	11829734	AT1G32700_2	299,	0,	8.0589	6.3764
Chr1	11846296	11846497	AT1G32750_1	201,	0,	8.19027	6.36502
Chr1	11846979	11847329	AT1G32750_2	350,	0,	6.61844	6.36502
Chr1	11848649	11848933	AT1G32750_3	49,152,	0,132,	2.33624	6.36502
Chr1	11853944	11854515	AT1G32750_4	1,92,157,	0,100,414,	2.66883	6.36502
Chr1	11874997	11875194	AT1G32790_1	197,	0,	14.7721	28.5471
Chr1	11885517	11886015	AT1G32810_1	498,	0,	6.05982	5.5428
Chr1	11955847	11955943	AT1G32990_1	96,	0,	4.92803	197.559
Chr1	11957018	11957354	AT1G32990_2	336,	0,	5.00584	197.559
Chr1	11966564	11967181	AT1G33040_1	51,79,61,	0,140,556,	6.13338	53.8736
Chr1	11967700	11967796	AT1G33040_2	96,	0,	8.25798	53.8736
Chr1	11967831	11968029	AT1G33050_1	198,	0,	13.7426	6.2995
Chr1	11975406	11976144	AT1G33060_1	309,150,91,	0,422,647,	4.40466	3.23838
Chr1	12005048	12005147	AT1G33110_1	99,	0,	2.62654	7.74921
Chr1	12008607	12008803	AT1G33110_2	196,	0,	8.65694	7.74921
Chr1	12012208	12012354	AT1G33120_1	146,	0,	14.8379	74.0762
Chr1	12024496	12024735	AT1G33140_1	239,	0,	8.484	100.553
Chr1	12049697	12049996	AT1G33230_1	299,	0,	10.9952	7.43977
Chr1	12051610	12051811	AT1G33240_1	201,	0,	5.52218	12.9623
Chr1	12051959	12052110	AT1G33240_2	151,	0,	3.12785	12.9623
Chr1	12052459	12052560	AT1G33240_3	101,	0,	4.31271	12.9623
Chr1	12052659	12052860	AT1G33240_4	201,	0,	4.84478	12.9623
Chr1	12053358	12053509	AT1G33240_5	151,	0,	5.19722	12.9623
Chr1	12057296	12057543	AT1G33250_1	247,	0,	7.41876	4.69535
Chr1	12059051	12059348	AT1G33250_2	297,	0,	2.71579	4.69535
Chr1	12067708	12068052	AT1G33265_1	344,	0,	10.6234	10.5279
Chr1	12068162	12068411	AT1G33270_1	249,	0,	12.6886	8.01313
Chr1	12075631	12076142	AT1G33290_1	19,51,225,	0,131,286,	8.14468	19.7142
Chr1	12086254	12086504	AT1G33330_1	250,	0,	10.7333	9.48184
Chr1	12095554	12095986	AT1G33360_1	61,239,	0,193,	6.60394	4.35069
Chr1	12109610	12110014	AT1G33410_1	203,95,	0,309,	8.5285	7.02655
Chr1	12146159	12146259	AT1G33470_1	100,	0,	2.23422	21.2404
Chr1	12146907	12147158	AT1G33470_2	251,	0,	7.03771	21.2404
Chr1	12148661	12148761	AT1G33480_1	100,	0,	12.7755	4.49873
Chr1	12150723	12150922	AT1G33490_1	199,	0,	11.406	9.73737
Chr1	12157743	12158336	AT1G33520_1	593,	0,	8.39874	14.7641
Chr1	12169561	12169661	AT1G33560_1	100,	0,	1.244	2.98217
Chr1	12204587	12204835	AT1G33680_1	248,	0,	2.1466	12.8166
Chr1	12208351	12208550	AT1G33680_2	199,	0,	13.3691	12.8166
Chr1	12244656	12244804	AT1G33780_1	148,	0,	3.40514	8.72924
Chr1	12246035	12246134	AT1G33780_2	99,	0,	5.00726	8.72924
Chr1	12266629	12266775	AT1G33810_1	146,	0,	9.62593	45.5162
Chr1	12326560	12327262	AT1G33930_1	27,132,334,	0,132,368,	4.62761	2.30256
Chr1	12349549	12349747	AT1G33970_1	198,	0,	2.71507	12.5289
Chr1	12354829	12354928	AT1G33980_1	99,	0,	10.0061	9.38183
Chr1	12357832	12357981	AT1G33990_1	149,	0,	10.909	20.9293
Chr1	12357957	12358200	AT1G34000_1	243,	0,	5.59251	77.7876
Chr1	12359549	12359790	AT1G34010_1	241,	0,	8.59292	7.45954
Chr1	12360402	12360547	AT1G34010_2	145,	0,	1.83219	7.45954
Chr1	12366909	12367009	AT1G34020_1	100,	0,	1.94286	4.80053
Chr1	12368951	12369151	AT1G34020_2	200,	0,	7.36595	4.80053
Chr1	12370160	12370305	AT1G34030_1	145,	0,	7.73665	105.076
Chr1	12398623	12398967	AT1G34065_1	207,40,	0,304,	1.77469	3.29474
Chr1	12419223	12419323	AT1G34110_1	100,	0,	1.31561	2.52931
Chr1	12428958	12429226	AT1G34120_1	30,120,	0,148,	2.21939	2.41536
Chr1	12432890	12433137	AT1G34130_1	247,	0,	12.7427	16.2
Chr1	12439014	12439353	AT1G34150_1	61,184,	0,155,	2.76343	3.43097
Chr1	12462708	12462856	AT1G34210_1	148,	0,	11.7913	5.8423
Chr1	12462898	12463196	AT1G34220_1	298,	0,	5.88554	6.54256
Chr1	12463592	12463692	AT1G34220_2	100,	0,	1.88638	6.54256
Chr1	12530913	12531064	AT1G34340_1	151,	0,	3.26928	5.8666
Chr1	12533858	12534207	AT1G34340_2	349,	0,	6.13401	5.8666
Chr1	12535921	12536066	AT1G34350_1	145,	0,	10.0972	5.97327
Chr1	12552704	12553010	AT1G34380_1	234,16,	0,290,	3.56457	7.71459
Chr1	12587824	12588074	AT1G34430_1	250,	0,	11.1132	52.1689
Chr1	12589974	12590124	AT1G34430_2	150,	0,	2.10019	52.1689
Chr1	12606683	12606983	AT1G34470_1	300,	0,	6.92903	5.28445
Chr1	12646722	12646920	AT1G34550_1	198,	0,	6.10574	9.49466
Chr1	12650039	12650385	AT1G34550_2	346,	0,	2.73341	9.49466
Chr1	12650857	12651006	AT1G34550_3	149,	0,	2.22712	9.49466
Chr1	12655022	12655168	AT1G34570_1	146,	0,	10.2003	13.7067
Chr1	12687597	12687691	AT1G34640_1	94,	0,	4.40141	5.43346
Chr1	12736148	12736446	AT1G34750_1	298,	0,	4.34	9.97059
Chr1	12748283	12748568	AT1G34770_1	36,161,	0,124,	6.90948	1.79243
Chr1	12748619	12748818	AT1G34780_1	199,	0,	9.42491	7.13841
Chr1	12868490	12868740	AT1G35160_1	250,	0,	10.2655	53.7286
Chr1	12914510	12914759	AT1G35220_1	249,	0,	16.0658	4.73837
Chr1	12937183	12937548	AT1G35260_1	156,37,	0,328,	2.70672	1.73999
Chr1	12977864	12977963	AT1G35340_1	99,	0,	3.18764	20.1246
Chr1	12979651	12979898	AT1G35340_2	247,	0,	3.30424	20.1246
Chr1	13041865	13042061	AT1G35460_1	196,	0,	6.12021	5.85137
Chr1	13074635	13074934	AT1G35510_1	299,	0,	6.64998	7.30349
Chr1	13122328	13122477	AT1G35580_1	149,	0,	12.1851	24.2946
Chr1	13208830	13208930	AT1G35680_1	100,	0,	2.22408	356.419
Chr1	13210180	13210379	AT1G35680_2	199,	0,	6.12121	356.419
Chr1	13221265	13221416	AT1G35710_1	151,	0,	2.34449	20.6417
Chr1	13223005	13223106	AT1G35710_2	101,	0,	2.00164	20.6417
Chr1	13223453	13223553	AT1G35710_3	100,	0,	2.19084	20.6417
Chr1	13277505	13277802	AT1G35780_1	297,	0,	7.17391	4.52923
Chr1	13278369	13278651	AT1G35780_2	14,185,	0,97,	1.93519	4.52923
Chr1	13453042	13453191	AT1G36050_1	149,	0,	13.7584	10.3502
Chr1	13470126	13470276	AT1G36070_2	150,	0,	2.48561	2.52551
Chr1	13642726	13643026	AT1G36280_1	300,	0,	3.21759	7.38653
Chr1	13670445	13670543	AT1G36310_1	98,	0,	1.66791	16.0448
Chr1	13670862	13671154	AT1G36310_2	292,	0,	9.16411	16.0448
Chr1	13673862	13674058	AT1G36320_1	196,	0,	11.9738	36.4944
Chr1	13701433	13701533	AT1G36380_1	100,	0,	3.79255	4.25534
Chr1	13701449	13701549	AT1G36390_1	100,	0,	4.37835	26.1806
Chr1	13701711	13701811	AT1G36390_2	100,	0,	6.00846	26.1806
Chr1	13703196	13703524	AT1G36390_3	68,180,	0,148,	3.42857	26.1806
Chr1	13899451	13899551	AT1G36730_1	100,	0,	1.68365	51.513
Chr1	14026743	14026941	AT1G36980_1	198,	0,	17.3471	27.2989
Chr1	14027369	14027665	AT1G36990_1	296,	0,	8.06566	6.22945
Chr1	15603715	15603912	AT1G41830_1	197,	0,	5.88136	43.1018
Chr1	15651081	15651280	AT1G41880_1	199,	0,	3.85384	75.4027
Chr1	15652281	15652492	AT1G41880_2	6,94,	0,117,	2.21827	75.4027
Chr1	15892295	15893734	AT1G42430_1	155,40,82,78,126,109,	0,386,661,848,1041,1330,	3.01096	10.7145
Chr1	15894281	15894478	AT1G42430_2	197,	0,	7.54105	10.7145
Chr1	15895295	15895594	AT1G42440_1	299,	0,	14.3179	10.9309
Chr1	15897531	15897813	AT1G42440_2	54,95,	0,187,	1.61971	10.9309
Chr1	15938545	15938924	AT1G42480_1	17,281,	0,98,	9.27548	12.2627
Chr1	15976613	15976714	AT1G42540_1	101,	0,	14.0925	3.95067
Chr1	15977449	15977549	AT1G42550_1	100,	0,	1.55776	53.0027
Chr1	15977895	15977995	AT1G42550_2	100,	0,	3.15114	53.0027
Chr1	15979009	15979208	AT1G42550_3	199,	0,	3.10874	53.0027
Chr1	15979405	15979754	AT1G42550_4	349,	0,	7.84068	53.0027
Chr1	16125841	16126288	AT1G42960_1	88,62,	0,385,	3.22539	93.2934
Chr1	16127049	16127248	AT1G42960_2	199,	0,	8.44511	93.2934
Chr1	16135919	16136067	AT1G42990_1	148,	0,	4.65834	17.1949
Chr1	16136411	16137069	AT1G42990_2	101,47,	0,611,	4.65923	17.1949
Chr1	16228435	16228920	AT1G43130_1	338,58,	0,427,	9.70796	6.42765
Chr1	16275255	16275452	AT1G43190_1	197,	0,	15.9342	20.4022
Chr1	16398175	16398422	AT1G43560_1	247,	0,	9.99898	65.6961
Chr1	16399731	16399831	AT1G43560_2	100,	0,	2.2732	65.6961
Chr1	16410570	16410869	AT1G43580_1	299,	0,	3.98449	10.046
Chr1	16425510	16425659	AT1G43620_1	149,	0,	11.6278	8.40898
Chr1	16470352	16470451	AT1G43670_1	99,	0,	11.5034	139.513
Chr1	16484473	16484619	AT1G43700_1	146,	0,	3.307	11.7589
Chr1	16484861	16485151	AT1G43700_2	89,106,	0,184,	2.74512	11.7589
Chr1	16485938	16486230	AT1G43700_3	292,	0,	9.92096	11.7589
Chr1	16486376	16486525	AT1G43710_1	149,	0,	6.92821	36.3931
Chr1	16577669	16577769	AT1G43800_1	100,	0,	4.41472	6.27098
Chr1	16618538	16618736	AT1G43850_1	198,	0,	2.82707	7.27398
Chr1	16620666	16620913	AT1G43850_2	247,	0,	2.79864	7.27398
Chr1	16621307	16622000	AT1G43850_3	693,	0,	4.12974	7.27398
Chr1	16620817	16620917	AT1G43860_1	100,	0,	3.08279	3.36227
Chr1	16621361	16622005	AT1G43860_2	644,	0,	4.4791	3.36227
Chr1	16622103	16622548	AT1G43860_3	445,	0,	6.13961	3.36227
Chr1	16648351	16648596	AT1G43890_1	245,	0,	9.59469	22.4909
Chr1	16654129	16654280	AT1G43900_1	151,	0,	4.69081	14.8445
Chr1	16655727	16655878	AT1G43900_2	151,	0,	7.513	14.8445
Chr1	16708149	16708248	AT1G44000_1	99,	0,	7.71833	39.376
Chr1	16796449	16796648	AT1G44170_1	199,	0,	11.6538	14.9581
Chr1	16848406	16848604	AT1G44446_1	198,	0,	7.59584	14.3309
Chr1	16873133	16873280	AT1G44575_1	147,	0,	6.95228	706.214
Chr1	16895082	16895378	AT1G44750_1	296,	0,	5.14474	6.19709
Chr1	16907634	16907782	AT1G44770_1	148,	0,	8.5726	13.6313
Chr1	16910976	16911077	AT1G44780_1	101,	0,	6.09996	3.07219
Chr1	16911844	16912270	AT1G44780_2	108,242,	0,184,	16.5529	3.07219
Chr1	16912202	16912399	AT1G44790_1	197,	0,	17.5414	19.2522
Chr1	16924228	16924476	AT1G44810_1	248,	0,	4.27353	12.6365
Chr1	16926345	16926690	AT1G44820_1	345,	0,	7.13274	6.8829
Chr1	16928310	16928606	AT1G44820_2	296,	0,	9.59819	6.8829
Chr1	16942265	16942461	AT1G44835_1	196,	0,	13.2949	11.9208
Chr1	16970312	16970512	AT1G44900_1	200,	0,	1.8308	6.14845
Chr1	16974404	16974654	AT1G44900_2	250,	0,	7.84229	6.14845
Chr1	16982136	16982965	AT1G44910_1	97,344,258,	0,181,571,	15.4476	6.20847
Chr1	16982952	16983250	AT1G44920_1	298,	0,	9.8281	65.9067
Chr1	16984245	16984345	AT1G44920_2	100,	0,	4.90237	65.9067
Chr1	17001541	17001686	AT1G44960_1	145,	0,	9.46288	6.82186
Chr1	17011580	17011730	AT1G45000_1	150,	0,	8.02068	43.2697
Chr1	17013483	17013584	AT1G45010_1	101,	0,	1.84798	8.11536
Chr1	17068834	17069219	AT1G45130_1	77,221,	0,164,	7.09726	9.34365
Chr1	17075089	17075287	AT1G45145_1	198,	0,	2.86945	15.0352
Chr1	17076219	17076318	AT1G45145_2	99,	0,	2.10361	15.0352
Chr1	17077484	17077732	AT1G45150_1	248,	0,	10.2093	3.28236
Chr1	17083570	17083769	AT1G45160_1	199,	0,	12.1041	8.23199
Chr1	17096028	17096273	AT1G45170_1	245,	0,	9.0762	5.60679
Chr1	17101390	17101607	AT1G45180_1	26,74,	0,143,	1.99647	1.87129
Chr1	17128424	17128624	AT1G45201_1	200,	0,	2.039	51.8971
Chr1	17130399	17130697	AT1G45207_1	298,	0,	8.87754	5.6836
Chr1	17130795	17130895	AT1G45207_2	100,	0,	1.37637	5.6836
Chr1	17133510	17133611	AT1G45207_3	101,	0,	2.85976	5.6836
Chr1	17169584	17169883	AT1G45230_1	299,	0,	10.7037	39.1499
Chr1	17165223	17165808	AT1G45249_1	271,30,98,	0,377,487,	4.33329	10.1834
Chr1	17167296	17167396	AT1G45249_2	100,	0,	1.69156	10.1834
Chr1	17180392	17180490	AT1G45474_1	98,	0,	12.629	116.054
Chr1	17191460	17191660	AT1G45688_1	200,	0,	3.28781	32.4215
Chr1	17192668	17192917	AT1G45688_2	249,	0,	2.56468	32.4215
Chr1	17193015	17193116	AT1G45688_3	101,	0,	3.24832	32.4215
Chr1	17200242	17200343	AT1G45976_1	101,	0,	1.65174	7.44797
Chr1	17200491	17200741	AT1G45976_2	250,	0,	4.78707	7.44797
Chr1	17225547	17225697	AT1G46264_1	150,	0,	1.75297	2.96174
Chr1	17225845	17225995	AT1G46264_2	150,	0,	2.81266	2.96174
Chr1	17277638	17277739	AT1G47056_2	101,	0,	2.20211	3.93559
Chr1	17282945	17283093	AT1G47128_1	148,	0,	3.21946	192.898
Chr1	17298079	17298180	AT1G47200_1	101,	0,	12.906	20.474
Chr1	17298628	17298729	AT1G47200_2	101,	0,	6.29202	20.474
Chr1	17308851	17309100	AT1G47240_1	249,	0,	11.9157	5.91545
Chr1	17320855	17321202	AT1G47250_1	347,	0,	8.63942	4.73167
Chr1	17320879	17321471	AT1G47260_1	592,	0,	8.26848	28.7868
Chr1	17328426	17328624	AT1G47270_1	198,	0,	6.06999	5.95399
Chr1	17331758	17331952	AT1G47278_1	194,	0,	9.89592	8.91559
Chr1	17338337	17338885	AT1G47290_1	17,67,64,	0,118,484,	2.57641	6.47618
Chr1	17338981	17339226	AT1G47290_2	245,	0,	14.3508	6.47618
Chr1	17344330	17344778	AT1G47310_1	448,	0,	4.75736	6.6522
Chr1	17352909	17353138	AT1G47330_1	133,16,	0,213,	2.15924	4.46315
Chr1	17395527	17395673	AT1G47410_1	146,	0,	13.5031	2.10975
Chr1	17395614	17395712	AT1G47420_1	98,	0,	10.8347	82.5244
Chr1	17424720	17424820	AT1G47490_1	100,	0,	4.30373	19.9324
Chr1	17427177	17427425	AT1G47490_2	248,	0,	18.6043	19.9324
Chr1	17432627	17432726	AT1G47500_1	99,	0,	2.37151	9.6193
Chr1	17434781	17435026	AT1G47500_2	245,	0,	19.465	9.6193
Chr1	17454115	17454313	AT1G47530_1	198,	0,	11.7643	23.6194
Chr1	17463794	17464045	AT1G47550_1	251,	0,	14.0532	10.9324
Chr1	17518243	17518391	AT1G47640_1	148,	0,	15.1006	17.2813
Chr1	17558308	17558454	AT1G47710_1	146,	0,	4.04844	15.4718
Chr1	17560087	17560234	AT1G47710_2	147,	0,	18.2117	15.4718
Chr1	17566659	17566759	AT1G47740_1	100,	0,	3.01954	9.32414
Chr1	17568899	17569297	AT1G47740_2	398,	0,	12.3083	9.32414
Chr1	17569950	17570100	AT1G47750_1	150,	0,	3.23535	6.40104
Chr1	17613078	17613378	AT1G47830_1	300,	0,	11.0893	16.545
Chr1	17647243	17647393	AT1G47900_1	150,	0,	17.2929	7.2807
Chr1	17651491	17651591	AT1G47900_2	100,	0,	5.69566	7.2807
Chr1	17687387	17688710	AT1G47970_1	308,391,	0,932,	8.25443	53.8682
Chr1	17725241	17725488	AT1G48050_1	61,88,	0,159,	2.65151	5.35292
Chr1	17726321	17726470	AT1G48050_2	149,	0,	2.51719	5.35292
Chr1	17732059	17732422	AT1G48090_1	202,49,	0,314,	21.5169	5.66193
Chr1	17770036	17770385	AT1G48110_1	349,	0,	9.62215	11.0522
Chr1	17770832	17771057	AT1G48110_2	79,71,	0,154,	1.90828	11.0522
Chr1	17783864	17784063	AT1G48140_1	199,	0,	17.0148	6.62768
Chr1	17786596	17786796	AT1G48160_1	200,	0,	16.1076	14.2614
Chr1	17789564	17789954	AT1G48170_1	390,	0,	8.69281	3.9709
Chr1	17796859	17797100	AT1G48200_1	241,	0,	5.17009	8.29207
Chr1	17801737	17801985	AT1G48210_1	248,	0,	12.3259	22.4799
Chr1	17808543	17808893	AT1G48230_1	350,	0,	10.1203	11.4072
Chr1	17809086	17809235	AT1G48240_1	149,	0,	4.24791	8.49127
Chr1	17848469	17848717	AT1G48310_1	248,	0,	2.22405	3.0094
Chr1	17854957	17855054	AT1G48320_1	97,	0,	2.36426	7.40395
Chr1	17855569	17855715	AT1G48320_2	146,	0,	4.14328	7.40395
Chr1	17864158	17864259	AT1G48330_1	101,	0,	1.53093	5.52591
Chr1	17868182	17868332	AT1G48350_1	150,	0,	7.10821	185.681
Chr1	17874582	17874731	AT1G48370_1	149,	0,	4.96091	4.28679
Chr1	17878789	17879073	AT1G48380_2	5,194,	0,90,	3.28436	3.36712
Chr1	17886160	17886360	AT1G48410_1	200,	0,	10.7784	28.9657
Chr1	17896639	17896839	AT1G48420_1	200,	0,	15.8719	27.1549
Chr1	17902730	17902829	AT1G48430_1	99,	0,	19.0996	12.069
Chr1	17908345	17908487	AT1G48440_1	142,	0,	14.2333	41.9572
Chr1	17908651	17908752	AT1G48450_1	101,	0,	9.93278	60.4682
Chr1	17911463	17911792	AT1G48460_1	95,43,9,	0,190,320,	1.91393	7.2011
Chr1	17913050	17913295	AT1G48460_2	245,	0,	9.17082	7.2011
Chr1	17921998	17922247	AT1G48490_1	249,	0,	11.2317	5.46717
Chr1	17942515	17942765	AT1G48520_1	250,	0,	12.3598	25.9943
Chr1	17950617	17950812	AT1G48550_1	195,	0,	8.12318	4.34561
Chr1	17955103	17955498	AT1G48570_1	395,	0,	11.5548	8.50039
Chr1	17957471	17957670	AT1G48570_2	199,	0,	2.40115	8.50039
Chr1	17968868	17969304	AT1G48600_1	23,326,	0,110,	6.54193	71.6642
Chr1	17970759	17971106	AT1G48610_1	347,	0,	9.41407	10.668
Chr1	17973104	17973204	AT1G48610_2	100,	0,	4.36371	10.668
Chr1	17973837	17974378	AT1G48620_1	541,	0,	3.29858	18.9092
Chr1	17976073	17976319	AT1G48620_2	246,	0,	7.09427	18.9092
Chr1	18036664	18037063	AT1G48760_1	399,	0,	5.60514	4.00412
Chr1	18040520	18040619	AT1G48770_1	99,	0,	3.03698	1.8646
Chr1	18043769	18043966	AT1G48790_1	197,	0,	12.3713	10.8897
Chr1	18059695	18059893	AT1G48830_1	198,	0,	8.51878	67.2119
Chr1	18065051	18065198	AT1G48850_1	147,	0,	17.5929	30.9922
Chr1	18067859	18068007	AT1G48850_2	148,	0,	3.97733	30.9922
Chr1	18068796	18068994	AT1G48860_1	198,	0,	11.1131	19.8064
Chr1	18071271	18071371	AT1G48860_2	100,	0,	3.92374	19.8064
Chr1	18081550	18081700	AT1G48880_1	150,	0,	2.33021	1.67819
Chr1	18084813	18085062	AT1G48900_1	249,	0,	11.4059	21.106
Chr1	18085161	18085403	AT1G48900_2	139,10,	0,232,	2.26917	21.106
Chr1	18101032	18101483	AT1G48920_1	259,90,	0,361,	3.81318	170.087
Chr1	18109203	18109444	AT1G48950_1	146,2,	0,239,	2.30888	4.15839
Chr1	18115426	18115769	AT1G48970_2	162,87,	0,256,	2.16671	7.44875
Chr1	18117288	18117388	AT1G48970_3	100,	0,	1.80696	7.44875
Chr1	18132689	18132835	AT1G49010_1	146,	0,	6.99189	18.5878
Chr1	18150563	18150859	AT1G49050_1	296,	0,	4.05721	6.00649
Chr1	18153117	18153315	AT1G49050_2	198,	0,	13.17	6.00649
Chr1	18174812	18175363	AT1G49130_1	108,332,	0,219,	2.87322	2.87133
Chr1	18175460	18175559	AT1G49130_2	99,	0,	1.81011	2.87133
Chr1	18176820	18177677	AT1G49140_1	193,6,	0,851,	4.17605	18.973
Chr1	18217997	18218193	AT1G49240_1	196,	0,	6.48152	66.0925
Chr1	18236960	18237155	AT1G49300_1	195,	0,	19.1157	20.8534
Chr1	18263921	18264422	AT1G49340_1	501,	0,	17.8606	8.94738
Chr1	18266875	18267220	AT1G49350_1	3,248,	0,97,	6.07585	4.04132
Chr1	18279136	18279433	AT1G49380_1	297,	0,	18.0069	29.025
Chr1	18283916	18284202	AT1G49400_1	286,	0,	11.8191	10.4595
Chr1	18285547	18285741	AT1G49410_1	194,	0,	18.4584	22.7546
Chr1	18295608	18295757	AT1G49430_1	149,	0,	7.97967	9.65471
Chr1	18310724	18311022	AT1G49470_1	298,	0,	2.7425	4.79926
Chr1	18314215	18314513	AT1G49480_1	298,	0,	12.85	14.3951
Chr1	18328371	18328665	AT1G49510_1	294,	0,	5.36179	14.1593
Chr1	18330630	18331054	AT1G49520_1	43,157,44,	0,135,380,	4.43747	1.96799
Chr1	18351470	18351766	AT1G49580_1	296,	0,	2.81585	10.2657
Chr1	18354338	18354585	AT1G49580_2	247,	0,	10.2779	10.2657
Chr1	18356292	18356635	AT1G49590_1	343,	0,	5.78557	6.16099
Chr1	18356948	18357149	AT1G49600_1	201,	0,	15.553	36.0173
Chr1	18359947	18360347	AT1G49600_2	400,	0,	4.23602	36.0173
Chr1	18365624	18365963	AT1G49620_1	339,	0,	2.69693	3.44586
Chr1	18368135	18368384	AT1G49630_2	249,	0,	9.23787	6.73643
Chr1	18371903	18372003	AT1G49630_3	100,	0,	1.95741	6.73643
Chr1	18375245	18375345	AT1G49630_4	100,	0,	2.49518	6.73643
Chr1	18377498	18377598	AT1G49650_1	100,	0,	2.03574	10.3955
Chr1	18378041	18378190	AT1G49650_2	149,	0,	1.94562	10.3955
Chr1	18378288	18378486	AT1G49650_3	198,	0,	5.36895	10.3955
Chr1	18381347	18381596	AT1G49670_1	249,	0,	9.40065	18.0941
Chr1	18391370	18391713	AT1G49710_1	343,	0,	7.0352	7.31412
Chr1	18402381	18402579	AT1G49720_1	198,	0,	13.0312	9.2613
Chr1	18402554	18402703	AT1G49730_1	149,	0,	7.56179	7.17979
Chr1	18409531	18409679	AT1G49740_1	148,	0,	8.59646	10.4107
Chr1	18412418	18412767	AT1G49750_1	349,	0,	7.29287	228.484
Chr1	18444904	18445054	AT1G49820_1	150,	0,	9.72063	11.3085
Chr1	18455135	18455476	AT1G49850_1	341,	0,	2.99087	4.18166
Chr1	18464143	18464241	AT1G49880_1	98,	0,	2.91132	3.06312
Chr1	18465841	18465939	AT1G49880_2	98,	0,	6.4204	3.06312
Chr1	18470343	18470593	AT1G49890_1	250,	0,	3.20433	6.46862
Chr1	18494128	18494786	AT1G49950_1	325,225,	0,433,	3.98652	10.9754
Chr1	18501815	18501963	AT1G49970_1	148,	0,	12.1788	92.2827
Chr1	18504904	18505003	AT1G49975_1	99,	0,	1.33041	19.8806
Chr1	18505297	18505495	AT1G49975_2	198,	0,	4.5658	19.8806
Chr1	18511903	18512200	AT1G49980_1	297,	0,	1.66234	5.38296
Chr1	18512944	18513143	AT1G49980_2	199,	0,	1.47258	5.38296
Chr1	18515107	18515304	AT1G50000_1	197,	0,	10.931	3.83317
Chr1	18519654	18519901	AT1G50010_1	247,	0,	3.84025	148.303
Chr1	18564161	18564387	AT1G50120_1	65,35,	0,191,	2.69576	7.82327
Chr1	18565923	18566121	AT1G50120_2	198,	0,	9.51918	7.82327
Chr1	18569784	18569934	AT1G50140_1	150,	0,	20.0237	9.62401
Chr1	18583541	18583735	AT1G50170_1	194,	0,	8.61201	12.3063
Chr1	18591292	18591492	AT1G50200_1	200,	0,	6.64701	47.7921
Chr1	18614004	18614450	AT1G50240_2	446,	0,	6.38743	1.87177
Chr1	18623943	18624964	AT1G50280_1	246,2,	0,1019,	1.67882	1.63582
Chr1	18628654	18630158	AT1G50300_1	360,124,82,33,	0,776,1013,1471,	5.04323	8.5359
Chr1	18638482	18638632	AT1G50320_1	150,	0,	10.2975	141.169
Chr1	18651720	18652214	AT1G50360_1	30,28,42,	0,122,452,	1.36064	4.87315
Chr1	18656953	18657350	AT1G50360_2	397,	0,	5.15831	4.87315
Chr1	18661755	18661904	AT1G50370_1	149,	0,	14.3135	16.5161
Chr1	18662315	18662415	AT1G50380_1	100,	0,	2.37504	9.74932
Chr1	18682030	18682230	AT1G50430_1	200,	0,	22.6703	40.0641
Chr1	18687561	18687907	AT1G50440_1	346,	0,	9.16373	9.78687
Chr1	18687833	18687931	AT1G50450_1	98,	0,	8.37973	43.5181
Chr1	18693841	18693941	AT1G50460_1	100,	0,	1.65775	5.70309
Chr1	18697114	18697263	AT1G50460_2	149,	0,	2.34923	5.70309
Chr1	18708022	18708220	AT1G50500_1	198,	0,	18.1033	7.25397
Chr1	18718771	18719187	AT1G50510_1	50,198,	0,218,	4.26908	7.73775
Chr1	18728681	18728971	AT1G50575_1	290,	0,	9.37244	11.5837
Chr1	18737211	18737412	AT1G50600_1	201,	0,	6.67254	8.09417
Chr1	18738707	18738857	AT1G50600_2	150,	0,	3.14122	8.09417
Chr1	18748586	18748685	AT1G50620_1	99,	0,	1.84264	3.50231
Chr1	18757963	18758063	AT1G50640_1	100,	0,	1.53651	12.3105
Chr1	18758261	18758361	AT1G50640_2	100,	0,	2.40498	12.3105
Chr1	18773037	18773382	AT1G50660_1	345,	0,	2.93133	15.1446
Chr1	18774512	18774661	AT1G50660_2	149,	0,	8.09983	15.1446
Chr1	18774901	18775226	AT1G50670_1	241,4,	0,321,	9.97547	16.4152
Chr1	18802022	18802320	AT1G50730_1	298,	0,	13.4599	3.82803
Chr1	18803313	18803412	AT1G50732_1	99,	0,	2.54748	11.207
Chr1	18808793	18808939	AT1G50740_1	146,	0,	4.14428	6.31966
Chr1	18839296	18839811	AT1G50840_1	132,19,	0,496,	2.21727	9.98587
[truncated: 11,146 more rows]

## Sheet: Ler
Chr	Start	End	Peak_ID	Block_sizes	Block_starts	Enrichment	Gene expression (FPKM)
Chr1	6836	7268	AT1G01020_1	233,112,	0,320,	6.65591	3.20647
Chr1	23818	24317	AT1G01040_1	499,	0,	4.20928	4.21961
Chr1	30543	31127	AT1G01040_2	273,226,	0,358,	4.02117	4.21961
Chr1	31266	31413	AT1G01050_1	147,	0,	3.96773	40.8986
Chr1	45412	45561	AT1G01080_1	149,	0,	4.88422	43.6092
Chr1	46418	46517	AT1G01080_2	99,	0,	3.09141	43.6092
Chr1	46664	46763	AT1G01080_3	99,	0,	3.54944	43.6092
Chr1	47582	47932	AT1G01090_1	350,	0,	1.69929	94.7977
Chr1	48954	49204	AT1G01090_2	250,	0,	1.76155	94.7977
Chr1	50145	50465	AT1G01100_1	192,47,	0,273,	4.30575	230.588
Chr1	64214	64459	AT1G01140_1	245,	0,	5.79925	15.7546
Chr1	67334	67530	AT1G01140_2	196,	0,	1.39365	15.7546
Chr1	73715	74096	AT1G01160_1	25,275,	0,106,	7.55365	10.51
Chr1	73977	74165	AT1G01170_1	188,	0,	5.79114	50.7148
Chr1	89594	90207	AT1G01210_1	151,46,	0,567,	4.47855	6.94455
Chr1	95432	95631	AT1G01220_1	199,	0,	6.84864	8.46217
Chr1	99045	99191	AT1G01230_1	146,	0,	4.30021	17.7102
Chr1	101443	101740	AT1G01240_1	297,	0,	3.11243	6.02953
Chr1	109879	109978	AT1G01260_1	99,	0,	1.60319	4.59285
Chr1	110469	110568	AT1G01260_2	99,	0,	1.67089	4.59285
Chr1	110862	110962	AT1G01260_3	100,	0,	1.60368	4.59285
Chr1	121166	121366	AT1G01320_1	200,	0,	3.86966	67.1115
Chr1	121999	122199	AT1G01320_2	200,	0,	1.84823	67.1115
Chr1	122447	122697	AT1G01320_3	250,	0,	2.70204	67.1115
Chr1	123394	123621	AT1G01320_4	107,43,	0,184,	2.14584	67.1115
Chr1	126242	126442	AT1G01320_5	200,	0,	2.34439	67.1115
Chr1	137528	137678	AT1G01350_1	150,	0,	3.61342	7.30945
Chr1	142114	142214	AT1G01360_1	100,	0,	1.91478	5.16865
Chr1	148365	148564	AT1G01390_1	199,	0,	3.92082	2.57102
Chr1	149557	149657	AT1G01390_2	100,	0,	2.27141	2.57102
Chr1	154638	154835	AT1G01420_1	197,	0,	3.02167	2.47589
Chr1	172797	172898	AT1G01470_1	101,	0,	2.85967	32.8715
Chr1	180314	180713	AT1G01490_1	399,	0,	10.2041	12.9834
Chr1	186593	186889	AT1G01500_1	296,	0,	2.82166	10.7194
Chr1	188647	188947	AT1G01510_1	300,	0,	1.60264	9.31267
Chr1	189824	190174	AT1G01510_2	350,	0,	7.1173	9.31267
Chr1	198341	198639	AT1G01540_1	298,	0,	4.4166	32.8263
Chr1	222689	222984	AT1G01610_1	295,	0,	2.76339	27.8412
Chr1	232939	233288	AT1G01650_1	349,	0,	6.79715	9.2165
Chr1	252179	252327	AT1G01690_1	148,	0,	3.45467	2.60255
Chr1	266032	266178	AT1G01710_1	146,	0,	18.9018	11.8587
Chr1	269840	269987	AT1G01725_1	147,	0,	4.50167	4.39553
Chr1	271889	272089	AT1G01730_1	200,	0,	2.86259	8.76997
Chr1	283948	284196	AT1G01780_1	248,	0,	7.80912	5.44443
Chr1	290902	291103	AT1G01790_1	201,	0,	14.912	38.5239
Chr1	296049	296195	AT1G01820_1	146,	0,	6.47571	31.562
Chr1	298650	299000	AT1G01830_1	350,	0,	3.2235	6.24206
Chr1	304164	304358	AT1G01840_1	194,	0,	2.87078	1.53077
Chr1	304181	304380	AT1G01860_1	199,	0,	2.78837	6.43833
Chr1	313198	313643	AT1G01910_1	445,	0,	3.32229	21.8989
Chr1	319419	319618	AT1G01920_1	199,	0,	6.43599	4.05294
Chr1	319915	320446	AT1G01930_1	230,45,67,	0,336,464,	5.53665	4.42232
Chr1	324673	324868	AT1G01940_1	195,	0,	8.0868	9.97751
Chr1	328082	328311	AT1G01950_1	25,124,	0,105,	2.08975	4.28273
Chr1	343312	343412	AT1G01990_1	100,	0,	2.74394	8.68386
Chr1	343954	344104	AT1G01990_2	150,	0,	3.15429	8.68386
Chr1	346211	346311	AT1G02000_1	100,	0,	1.50795	4.03032
Chr1	347055	347205	AT1G02000_2	150,	0,	1.41145	4.03032
Chr1	347304	347454	AT1G02000_3	150,	0,	3.71385	4.03032
Chr1	352759	352858	AT1G02020_1	99,	0,	4.15255	6.39198
Chr1	354236	354533	AT1G02020_2	297,	0,	3.79301	6.39198
Chr1	387325	387701	AT1G02090_1	178,118,	0,258,	8.71508	12.4645
Chr1	392419	392816	AT1G02100_1	397,	0,	8.97123	12.2142
Chr1	393076	393471	AT1G02110_1	395,	0,	2.37732	8.33976
Chr1	395035	395134	AT1G02110_2	99,	0,	3.72566	8.33976
Chr1	395281	395528	AT1G02110_3	247,	0,	5.44133	8.33976
Chr1	399105	399903	AT1G02120_1	5,212,420,	0,76,378,	5.51637	23.9192
Chr1	400127	400369	AT1G02130_1	242,	0,	6.09342	22.4853
Chr1	403293	403391	AT1G02140_1	98,	0,	13.9894	65.622
Chr1	408421	408619	AT1G02145_1	198,	0,	13.9569	7.68731
Chr1	410432	410532	AT1G02150_1	100,	0,	3.5166	67.3446
Chr1	411398	411539	AT1G02160_1	141,	0,	3.70496	19.4835
Chr1	411953	412196	AT1G02170_1	243,	0,	2.24786	13.4912
Chr1	413289	413506	AT1G02170_2	6,140,	0,77,	3.77246	13.4912
Chr1	413569	413716	AT1G02180_1	147,	0,	3.77129	4.97848
Chr1	443216	443513	AT1G02270_1	297,	0,	5.20146	13.2064
Chr1	448519	448617	AT1G02280_1	98,	0,	7.9669	63.4731
Chr1	455323	455470	AT1G02300_1	147,	0,	3.80638	32.5706
Chr1	457872	458116	AT1G02305_1	244,	0,	3.25212	40.1642
Chr1	462094	462294	AT1G02330_1	200,	0,	4.67807	7.4642
Chr1	462776	463124	AT1G02330_2	24,124,2,	0,99,346,	1.70866	7.4642
Chr1	463222	463469	AT1G02330_3	101,49,	0,198,	2.3126	7.4642
Chr1	476363	476513	AT1G02370_1	150,	0,	3.83588	4.08086
Chr1	492635	492930	AT1G02410_1	295,	0,	8.39787	8.28135
Chr1	498299	498395	AT1G02450_1	96,	0,	3.48777	8.30007
Chr1	513896	514117	AT1G02475_1	138,12,	0,209,	4.55317	37.3844
Chr1	515124	515323	AT1G02475_2	199,	0,	2.48062	37.3844
Chr1	539781	540028	AT1G02560_1	247,	0,	6.90876	181.489
Chr1	574237	574537	AT1G02660_1	300,	0,	2.64072	2.9276
Chr1	581928	582024	AT1G02680_1	96,	0,	3.63987	5.0659
Chr1	584479	584578	AT1G02690_1	99,	0,	1.55134	4.85165
Chr1	592078	592327	AT1G02720_1	249,	0,	2.18585	4.13546
Chr1	593965	594165	AT1G02720_2	200,	0,	4.26795	4.13546
Chr1	607991	608415	AT1G02780_1	156,68,18,	0,250,406,	2.17142	368.85
Chr1	629596	629746	AT1G02840_1	150,	0,	11.0035	24.8835
Chr1	636871	637212	AT1G02860_1	15,235,	0,106,	2.34744	2.85752
Chr1	637313	637649	AT1G02870_1	201,48,	0,288,	3.46353	17.3609
Chr1	642853	643103	AT1G02880_1	250,	0,	5.00253	4.42724
Chr1	655665	655764	AT1G02910_1	99,	0,	11.8767	31.3884
Chr1	662128	662228	AT1G02930_1	100,	0,	1.82569	18.7643
Chr1	666954	667283	AT1G02960_1	114,133,	0,196,	6.25224	3.53921
Chr1	683967	684118	AT1G02990_2	151,	0,	2.6504	2.51595
Chr1	684416	684567	AT1G02990_3	151,	0,	3.65932	2.51595
Chr1	687894	688144	AT1G03000_1	250,	0,	8.13464	6.82377
Chr1	703535	703782	AT1G03030_1	247,	0,	7.7598	5.90484
Chr1	703944	704288	AT1G03040_1	344,	0,	4.72099	17.0424
Chr1	706394	706542	AT1G03040_2	148,	0,	1.79384	17.0424
Chr1	710066	710269	AT1G03055_1	70,29,	0,174,	4.72784	1.80435
Chr1	713939	714090	AT1G03060_2	151,	0,	1.63567	3.92889
Chr1	715879	715980	AT1G03060_3	101,	0,	1.37296	3.92889
Chr1	716878	716979	AT1G03060_4	101,	0,	1.44669	3.92889
Chr1	731752	732300	AT1G03080_1	548,	0,	4.48578	3.66818
Chr1	733330	733480	AT1G03080_2	150,	0,	1.86573	3.66818
Chr1	733877	734027	AT1G03080_3	150,	0,	1.89019	3.66818
Chr1	735270	735370	AT1G03080_4	100,	0,	1.99162	3.66818
Chr1	743637	744035	AT1G03090_1	79,221,	0,177,	6.9048	4.27488
Chr1	751680	751828	AT1G03110_1	148,	0,	4.0993	6.06301
Chr1	753736	754119	AT1G03130_1	383,	0,	2.3677	689.578
Chr1	755526	755770	AT1G03140_1	244,	0,	5.06662	18.8449
Chr1	758254	758535	AT1G03150_1	5,186,	0,95,	3.70235	11.3974
Chr1	765947	766145	AT1G03160_1	198,	0,	3.31046	22.599
Chr1	779814	779914	AT1G03190_1	100,	0,	7.49982	2.5999
Chr1	784196	784296	AT1G03210_1	100,	0,	4.91049	7.28406
Chr1	787179	787379	AT1G03220_1	200,	0,	3.15234	13.5669
Chr1	790065	790410	AT1G03230_1	345,	0,	3.54957	7.45503
Chr1	793411	793655	AT1G03250_1	244,	0,	5.78146	12.3914
Chr1	795597	795747	AT1G03260_1	150,	0,	7.47595	4.59853
Chr1	806669	806967	AT1G03280_1	298,	0,	10.2266	9.85821
Chr1	809439	809998	AT1G03290_1	143,117,88,	0,232,471,	2.66407	5.49135
Chr1	810587	810836	AT1G03290_2	249,	0,	9.14722	5.49135
Chr1	811083	811282	AT1G03290_3	199,	0,	2.93725	5.49135
Chr1	816563	816663	AT1G03310_1	100,	0,	2.66429	25.1324
Chr1	818030	818273	AT1G03330_1	243,	0,	8.68008	17.0006
Chr1	823273	823471	AT1G03350_1	198,	0,	3.55291	16.5358
Chr1	826104	826350	AT1G03360_1	246,	0,	4.19655	5.5709
Chr1	828810	828910	AT1G03365_1	100,	0,	2.1276	4.05819
Chr1	829009	830045	AT1G03365_2	173,325,	0,711,	3.31408	4.05819
Chr1	830749	830849	AT1G03370_1	100,	0,	1.95194	8.15328
Chr1	834612	834762	AT1G03370_2	150,	0,	2.20173	8.15328
Chr1	834911	835012	AT1G03370_3	101,	0,	1.41844	8.15328
Chr1	835111	835311	AT1G03370_4	200,	0,	4.89377	8.15328
Chr1	842805	842953	AT1G03400_1	148,	0,	4.5587	18.0135
Chr1	849274	849473	AT1G03430_1	199,	0,	3.8024	10.5565
Chr1	852400	852550	AT1G03440_1	150,	0,	1.70063	8.73998
Chr1	853198	853449	AT1G03440_2	251,	0,	1.91315	8.73998
Chr1	863973	864074	AT1G03457_1	101,	0,	5.03237	2.52303
Chr1	866335	866629	AT1G03470_1	294,	0,	4.67324	2.64608
Chr1	869051	869533	AT1G03475_1	319,80,	0,402,	5.48591	165.361
Chr1	871008	871159	AT1G03475_2	151,	0,	1.87984	165.361
Chr1	877910	878060	AT1G03520_1	150,	0,	2.85632	3.23368
Chr1	880581	880681	AT1G03530_1	100,	0,	3.76018	4.58944
Chr1	880878	880978	AT1G03530_2	100,	0,	3.2215	4.58944
Chr1	881472	881572	AT1G03530_3	100,	0,	4.185	4.58944
Chr1	882311	882659	AT1G03530_4	348,	0,	7.89491	4.58944
Chr1	894336	894632	AT1G03590_1	296,	0,	4.38416	6.07041
Chr1	898917	899113	AT1G03600_1	196,	0,	2.68637	204.671
Chr1	901175	901275	AT1G03610_1	100,	0,	1.66409	5.06257
Chr1	916914	917059	AT1G03680_1	145,	0,	5.09771	322.458
Chr1	920292	920542	AT1G03687_1	250,	0,	5.82124	6.41237
Chr1	930958	931203	AT1G03730_1	245,	0,	1.63343	4.19821
Chr1	936452	936553	AT1G03740_1	101,	0,	1.57916	7.86557
Chr1	936752	937002	AT1G03740_2	250,	0,	4.29889	7.86557
Chr1	941110	941781	AT1G03760_1	157,66,36,88,	0,255,426,583,	2.98435	3.55378
Chr1	942260	942458	AT1G03760_2	198,	0,	2.30671	3.55378
Chr1	947913	948062	AT1G03780_1	149,	0,	1.82131	3.99181
Chr1	948307	948793	AT1G03780_2	36,212,97,	0,121,389,	3.40581	3.99181
Chr1	960083	960329	AT1G03820_1	246,	0,	3.5166	3.91351
Chr1	962473	962671	AT1G03830_3	198,	0,	2.15437	2.56879
Chr1	963508	963799	AT1G03830_4	38,161,	0,130,	2.57321	2.56879
Chr1	979406	979557	AT1G03860_1	151,	0,	12.1325	30.3097
Chr1	983058	983399	AT1G03870_1	341,	0,	2.03514	65.2351
Chr1	991650	992446	AT1G03900_1	96,4,	0,792,	2.14958	38.319
Chr1	997182	997776	AT1G03910_1	94,72,63,22,	0,235,421,572,	4.27285	11.8693
Chr1	1000179	1000429	AT1G03910_2	250,	0,	13.6564	11.8693
Chr1	1008024	1008222	AT1G03930_1	198,	0,	5.84801	12.3825
Chr1	1011247	1011656	AT1G03950_1	186,56,3,	0,254,406,	5.24975	8.83557
Chr1	1014433	1014532	AT1G03960_1	99,	0,	1.41705	3.18453
Chr1	1018701	1018950	AT1G03970_1	249,	0,	3.48734	15.116
Chr1	1042647	1042794	AT1G04030_1	147,	0,	1.3234	1.513
Chr1	1042657	1042969	AT1G04040_1	84,16,	0,296,	1.19546	90.5333
Chr1	1048616	1048899	AT1G04050_2	14,39,47,	0,103,236,	6.17254	1.19986
Chr1	1056476	1056727	AT1G04080_1	251,	0,	10.7405	19.5357
Chr1	1062478	1062627	AT1G04110_1	149,	0,	1.9973	4.53876
Chr1	1064611	1064910	AT1G04120_1	299,	0,	7.19727	8.18514
Chr1	1075125	1075568	AT1G04130_1	75,268,	0,175,	5.68838	4.04298
Chr1	1075741	1075991	AT1G04140_1	250,	0,	5.63515	24.0037
Chr1	1092398	1092854	AT1G04160_1	23,99,79,	0,173,377,	2.0958	1.80844
Chr1	1099653	1099852	AT1G04170_1	199,	0,	9.70396	44.5262
Chr1	1106500	1106647	AT1G04190_1	147,	0,	9.07901	13.8442
Chr1	1113760	1114007	AT1G04200_1	247,	0,	4.52733	6.12186
Chr1	1141068	1141218	AT1G04260_1	150,	0,	1.32297	4.99748
Chr1	1141751	1141849	AT1G04270_1	98,	0,	7.98488	242.587
Chr1	1144275	1144374	AT1G04280_2	99,	0,	3.19365	3.6283
Chr1	1147641	1147740	AT1G04290_1	99,	0,	2.03535	9.49413
Chr1	1148286	1148385	AT1G04290_2	99,	0,	3.04698	9.49413
Chr1	1149363	1149713	AT1G04300_1	350,	0,	2.12237	8.29598
Chr1	1150705	1151512	AT1G04300_2	177,151,113,10,	0,262,506,797,	5.56381	8.29598
Chr1	1163152	1163302	AT1G04340_1	150,	0,	5.87132	10.2971
Chr1	1166495	1166742	AT1G04350_1	247,	0,	4.43426	12.8581
Chr1	1189238	1189386	AT1G04410_1	148,	0,	5.02655	441.416
Chr1	1201228	1201329	AT1G04430_1	101,	0,	2.50799	32.7953
Chr1	1217229	1217326	AT1G04480_1	97,	0,	8.40897	102.645
Chr1	1230596	1230797	AT1G04510_1	201,	0,	11.0911	21.8627
Chr1	1231647	1231795	AT1G04520_1	148,	0,	2.88409	6.40217
Chr1	1233558	1233983	AT1G04520_2	42,204,	0,221,	2.46503	6.40217
Chr1	1234273	1234422	AT1G04530_1	149,	0,	3.9017	24.0384
Chr1	1235665	1235862	AT1G04530_2	197,	0,	3.34206	24.0384
Chr1	1241100	1241296	AT1G04550_1	196,	0,	2.67777	10.952
Chr1	1241815	1242060	AT1G04550_2	245,	0,	2.35139	10.952
Chr1	1243690	1244145	AT1G04555_1	53,294,	0,161,	4.05115	4.37959
Chr1	1258653	1258898	AT1G04590_1	245,	0,	10.0918	10.1453
Chr1	1282705	1282953	AT1G04620_1	248,	0,	4.03504	21.2559
Chr1	1289783	1289982	AT1G04630_1	199,	0,	5.95655	27.6623
Chr1	1315432	1315726	AT1G04690_1	294,	0,	3.2968	51.8621
Chr1	1324495	1324693	AT1G04710_1	198,	0,	8.4294	11.6472
Chr1	1331613	1331862	AT1G04750_1	249,	0,	11.2949	35.265
Chr1	1337651	1337800	AT1G04770_1	149,	0,	2.11054	5.10698
Chr1	1340700	1341047	AT1G04780_1	347,	0,	3.19239	9.88271
Chr1	1341521	1341769	AT1G04780_2	248,	0,	2.19083	9.88271
Chr1	1348621	1348868	AT1G04790_1	247,	0,	8.21871	5.32405
Chr1	1348646	1348989	AT1G04800_1	343,	0,	7.91289	64.4585
Chr1	1355166	1355366	AT1G04810_1	200,	0,	5.28683	14.0358
Chr1	1356329	1356478	AT1G04820_1	149,	0,	4.26496	174.8
Chr1	1359069	1359219	AT1G04830_1	150,	0,	2.51465	3.87293
Chr1	1365155	1365402	AT1G04850_1	247,	0,	12.5173	26.4868
Chr1	1366098	1366862	AT1G04850_2	30,82,68,61,56,	0,119,292,502,708,	4.31771	26.4868
Chr1	1373381	1373529	AT1G04870_1	148,	0,	5.18205	14.5292
Chr1	1387920	1388021	AT1G04910_1	101,	0,	8.19398	10.7495
Chr1	1400580	1400780	AT1G04940_1	200,	0,	3.31934	1.78259
Chr1	1403232	1403331	AT1G04950_1	99,	0,	12.2238	6.12755
Chr1	1407869	1408115	AT1G04960_1	246,	0,	6.55423	7.50349
Chr1	1413428	1413577	AT1G04970_1	149,	0,	6.09975	6.47529
Chr1	1413741	1414036	AT1G04980_1	295,	0,	3.14811	6.5204
Chr1	1416390	1416924	AT1G04985_1	389,56,	0,478,	2.79409	9.57937
Chr1	1419156	1419357	AT1G04990_1	201,	0,	4.27184	7.2069
Chr1	1419455	1419606	AT1G04990_2	151,	0,	1.31784	7.2069
Chr1	1448780	1448930	AT1G05055_1	150,	0,	7.03228	6.08725
Chr1	1450750	1450851	AT1G05055_2	101,	0,	6.39334	6.08725
Chr1	1451099	1451482	AT1G05060_1	263,32,	0,351,	2.68977	8.32299
Chr1	1457105	1457205	AT1G05070_1	100,	0,	6.55783	11.4622
Chr1	1471520	1471852	AT1G05120_1	176,73,	0,259,	5.94984	4.43844
Chr1	1482691	1482839	AT1G05140_1	148,	0,	2.34412	36.8497
Chr1	1483912	1484010	AT1G05140_2	98,	0,	4.34622	36.8497
Chr1	1491169	1491367	AT1G05170_1	198,	0,	4.2077	4.34911
Chr1	1498261	1498459	AT1G05180_1	198,	0,	10.9389	11.3363
Chr1	1509244	1509435	AT1G05205_1	191,	0,	3.21666	17.0072
Chr1	1510150	1510246	AT1G05205_2	96,	0,	1.79548	17.0072
Chr1	1512945	1513244	AT1G05230_1	299,	0,	6.25685	6.26692
Chr1	1516864	1517114	AT1G05230_2	250,	0,	1.95112	6.26692
Chr1	1518650	1518751	AT1G05230_3	101,	0,	1.72505	6.26692
Chr1	1531740	1531840	AT1G05270_1	100,	0,	4.23311	12.8681
Chr1	1560726	1560972	AT1G05350_1	246,	0,	8.09199	11.9535
Chr1	1577465	1577812	AT1G05380_1	347,	0,	2.2034	7.06492
Chr1	1577960	1578258	AT1G05380_2	298,	0,	2.33439	7.06492
Chr1	1578405	1578555	AT1G05380_3	150,	0,	1.64173	7.06492
Chr1	1582324	1582672	AT1G05380_4	348,	0,	5.22876	7.06492
Chr1	1585468	1585664	AT1G05410_1	196,	0,	3.93757	4.67729
Chr1	1594199	1594298	AT1G05430_1	99,	0,	3.15185	13.684
Chr1	1601296	1601844	AT1G05460_1	548,	0,	8.38112	3.74112
Chr1	1628989	1629189	AT1G05500_1	200,	0,	13.7345	13.2733
Chr1	1630898	1631148	AT1G05520_1	250,	0,	7.3062	12.6425
Chr1	1635369	1635569	AT1G05520_2	200,	0,	1.33044	12.6425
Chr1	1645705	1646203	AT1G05560_1	498,	0,	4.00488	15.6392
Chr1	1647673	1647973	AT1G05570_1	300,	0,	4.97905	7.04377
Chr1	1671455	1671852	AT1G05590_1	397,	0,	2.07852	6.81321
Chr1	1717043	1717241	AT1G05710_1	198,	0,	3.14241	1.96126
Chr1	1717536	1717685	AT1G05720_1	149,	0,	5.75126	10.6777
Chr1	1732410	1732559	AT1G05785_1	149,	0,	4.92939	1.6677
Chr1	1736647	1736950	AT1G05790_1	84,116,	0,187,	1.30954	5.54981
Chr1	1737198	1737434	AT1G05790_2	3,148,	0,88,	4.257	5.54981
Chr1	1754723	1754971	AT1G05830_1	248,	0,	3.12615	3.86419
Chr1	1761611	1761810	AT1G05830_2	199,	0,	3.64705	3.86419
Chr1	1762783	1763136	AT1G05840_1	205,46,	0,307,	10.537	5.04968
Chr1	1766648	1766894	AT1G05850_1	246,	0,	4.03626	240.311
Chr1	1773135	1773285	AT1G05870_1	150,	0,	2.1447	5.65477
Chr1	1782531	1782735	AT1G05890_1	13,86,	0,118,	1.46454	11.3306
Chr1	1784180	1784527	AT1G05890_2	347,	0,	6.58458	11.3306
Chr1	1789489	1789688	AT1G05900_1	199,	0,	7.25976	4.57902
Chr1	1791659	1792007	AT1G05910_1	348,	0,	7.81281	6.39919
Chr1	1801208	1801358	AT1G05940_1	150,	0,	8.80285	13.3099
Chr1	1808008	1808752	AT1G05960_1	628,17,	0,727,	6.60119	11.1646
Chr1	1821496	1821795	AT1G06000_1	299,	0,	3.15305	22.1945
Chr1	1823710	1823902	AT1G06010_1	192,	0,	10.3893	4.68825
Chr1	1834274	1834373	AT1G06060_1	99,	0,	1.65573	7.51048
Chr1	1834974	1835464	AT1G06070_1	490,	0,	4.60911	5.4218
Chr1	1853108	1853257	AT1G06110_1	149,	0,	4.97215	6.8205
Chr1	1857854	1858100	AT1G06130_1	246,	0,	8.01823	11.2922
Chr1	1869038	1869188	AT1G06150_1	150,	0,	10.125	7.17709
Chr1	1894385	1894675	AT1G06200_1	290,	0,	10.0014	20.4369
Chr1	1897275	1897680	AT1G06210_1	29,119,	0,286,	2.49722	7.30411
Chr1	1898795	1899139	AT1G06210_2	344,	0,	5.02236	7.30411
Chr1	1904547	1904847	AT1G06220_1	300,	0,	11.0151	17.1548
Chr1	1908455	1908804	AT1G06230_1	349,	0,	1.55311	10.4642
Chr1	1909301	1909700	AT1G06230_2	399,	0,	2.51963	10.4642
Chr1	1910458	1910807	AT1G06230_3	349,	0,	9.65141	10.4642
Chr1	1911343	1911667	AT1G06240_1	224,26,	0,298,	2.80604	8.66393
Chr1	1912896	1913146	AT1G06240_2	250,	0,	5.56332	8.66393
Chr1	1925981	1926130	AT1G06290_1	149,	0,	3.51666	20.832
Chr1	1950414	1950712	AT1G06390_1	298,	0,	6.70473	15.7355
Chr1	1950892	1951190	AT1G06400_1	298,	0,	5.96995	17.3671
Chr1	1956490	1956591	AT1G06410_1	101,	0,	1.49523	32.3923
Chr1	1958318	1958717	AT1G06410_2	399,	0,	4.72792	32.3923
Chr1	1960130	1960281	AT1G06430_1	151,	0,	5.29604	22.2505
Chr1	1967184	1967283	AT1G06460_1	99,	0,	2.56283	183.068
Chr1	1973442	1973738	AT1G06470_1	296,	0,	11.0422	10.2929
Chr1	1990285	1990434	AT1G06500_1	149,	0,	2.7625	6.54618
Chr1	1990630	1990730	AT1G06500_2	100,	0,	12.4946	6.54618
Chr1	1990682	1990877	AT1G06515_1	195,	0,	5.9487	11.3668
Chr1	2003725	2004078	AT1G06550_1	157,91,	0,262,	5.1053	9.89866
Chr1	2029404	2029505	AT1G06630_1	101,	0,	2.88894	2.82699
Chr1	2033815	2033964	AT1G06640_1	149,	0,	2.89117	6.57554
Chr1	2035523	2035674	AT1G06645_1	151,	0,	2.98375	7.25954
Chr1	2037118	2037366	AT1G06650_1	248,	0,	5.46498	31.2665
Chr1	2037359	2037507	AT1G06660_1	148,	0,	8.47948	1.35421
Chr1	2046215	2046564	AT1G06670_1	349,	0,	1.7884	6.64148
Chr1	2046711	2046812	AT1G06670_2	101,	0,	1.5349	6.64148
Chr1	2047108	2047556	AT1G06670_3	448,	0,	3.25578	6.64148
Chr1	2047972	2048166	AT1G06680_1	194,	0,	1.70676	2733.11
Chr1	2049691	2049838	AT1G06690_1	147,	0,	3.96279	24.8001
Chr1	2052568	2052817	AT1G06700_1	249,	0,	8.21911	20.4885
Chr1	2060592	2060985	AT1G06720_1	184,114,	0,279,	5.81811	6.04622
Chr1	2062737	2063540	AT1G06720_2	84,94,219,	0,154,584,	3.04101	6.04622
Chr1	2067608	2067758	AT1G06730_1	150,	0,	2.05596	6.32336
Chr1	2070005	2070405	AT1G06730_2	400,	0,	7.92749	6.32336
Chr1	2077428	2077574	AT1G06760_1	146,	0,	3.26372	123.508
Chr1	2089301	2089544	AT1G06790_1	243,	0,	11.4649	3.93811
Chr1	2089465	2089564	AT1G06800_1	99,	0,	9.89621	2.74079
Chr1	2090315	2090512	AT1G06800_2	197,	0,	2.20922	2.74079
Chr1	2105245	2105591	AT1G06850_1	346,	0,	3.29443	3.49227
Chr1	2110740	2110937	AT1G06870_1	197,	0,	7.81409	7.79679
Chr1	2111471	2111821	AT1G06890_1	350,	0,	3.97224	27.9928
Chr1	2115012	2115361	AT1G06900_1	349,	0,	3.41902	11.0751
Chr1	2120211	2120497	AT1G06900_2	20,180,	0,106,	6.69148	11.0751
Chr1	2122917	2123604	AT1G06910_1	1,99,	0,588,	6.0993	2.24649
Chr1	2130202	2130402	AT1G06950_1	200,	0,	8.00491	70.1491
Chr1	2130908	2131009	AT1G06950_2	101,	0,	1.34855	70.1491
Chr1	2131357	2131507	AT1G06950_3	150,	0,	1.59151	70.1491
Chr1	2135453	2135603	AT1G06950_4	150,	0,	2.14285	70.1491
Chr1	2137494	2137740	AT1G06960_1	246,	0,	11.8432	8.28101
Chr1	2154971	2155220	AT1G07010_1	249,	0,	6.78185	13.5516
Chr1	2158462	2158612	AT1G07030_1	150,	0,	3.91255	9.61404
Chr1	2161017	2161264	AT1G07040_1	247,	0,	4.19402	10.1792
Chr1	2162943	2163091	AT1G07040_2	148,	0,	2.25813	10.1792
Chr1	2165061	2165211	AT1G07050_1	150,	0,	3.41045	54.3853
Chr1	2169663	2169811	AT1G07070_1	148,	0,	4.21167	31.1553
Chr1	2171802	2171998	AT1G07080_1	196,	0,	6.61306	40.1451
Chr1	2174790	2174939	AT1G07090_1	149,	0,	2.49054	9.11801
Chr1	2178220	2178420	AT1G07110_1	200,	0,	4.93405	51.1564
Chr1	2190210	2190450	AT1G07135_1	240,	0,	2.25309	15.6744
Chr1	2190544	2190641	AT1G07135_2	97,	0,	1.89124	15.6744
Chr1	2192020	2192217	AT1G07140_1	197,	0,	5.05998	112.958
Chr1	2192362	2192559	AT1G07140_2	197,	0,	4.92258	112.958
Chr1	2200928	2201174	AT1G07170_1	246,	0,	5.00169	6.11299
Chr1	2206355	2206455	AT1G07180_1	100,	0,	1.7154	5.56749
Chr1	2206704	2206902	AT1G07180_2	198,	0,	4.7031	5.56749
Chr1	2216692	2216934	AT1G07210_1	242,	0,	8.16786	17.0391
Chr1	2216974	2217224	AT1G07220_1	250,	0,	6.49624	6.94899
Chr1	2218848	2219450	AT1G07220_2	59,191,	0,411,	2.06548	6.94899
Chr1	2220328	2220625	AT1G07230_1	297,	0,	3.9463	11.536
Chr1	2225958	2226259	AT1G07250_1	301,	0,	2.67053	13.8194
Chr1	2227207	2227358	AT1G07250_2	151,	0,	1.75342	13.8194
Chr1	2257532	2257830	AT1G07350_1	298,	0,	2.67534	9.41844
Chr1	2260414	2260563	AT1G07360_1	149,	0,	4.45283	17.8228
Chr1	2260709	2260808	AT1G07360_2	99,	0,	1.77491	17.8228
Chr1	2260906	2261005	AT1G07360_3	99,	0,	1.22214	17.8228
Chr1	2280058	2280256	AT1G07420_1	198,	0,	9.00152	18.8381
Chr1	2294237	2294558	AT1G07470_1	17,232,	0,89,	9.46815	6.78597
Chr1	2296468	2296805	AT1G07480_1	261,38,	0,299,	11.2626	3.91676
Chr1	2309016	2309166	AT1G07510_1	150,	0,	1.58523	3.66952
Chr1	2309315	2309514	AT1G07510_2	199,	0,	3.06523	3.66952
Chr1	2310956	2311056	AT1G07510_4	100,	0,	2.96501	3.66952
Chr1	2313976	2314126	AT1G07530_1	150,	0,	3.15449	7.59174
Chr1	2339292	2339391	AT1G07590_1	99,	0,	1.82718	26.7273
Chr1	2341590	2341812	AT1G07610_1	68,29,	0,193,	3.60463	16.4692
Chr1	2342246	2342543	AT1G07615_1	297,	0,	5.17058	3.93135
Chr1	2359706	2359905	AT1G07650_1	199,	0,	6.40922	11.3953
Chr1	2370168	2370367	AT1G07670_1	199,	0,	3.82175	8.61643
Chr1	2374144	2374244	AT1G07670_2	100,	0,	2.10368	8.61643
Chr1	2381095	2381292	AT1G07700_1	197,	0,	6.43518	22.15
Chr1	2385858	2386058	AT1G07705_1	200,	0,	9.59854	8.75632
Chr1	2391129	2391230	AT1G07720_1	101,	0,	1.34179	21.7957
Chr1	2404138	2404285	AT1G07750_1	147,	0,	3.63556	6.76985
Chr1	2408236	2408480	AT1G07770_1	244,	0,	3.99193	87.3652
Chr1	2410012	2410357	AT1G07780_1	345,	0,	3.66872	4.43521
Chr1	2413032	2413175	AT1G07790_1	143,	0,	2.42816	50.1474
Chr1	2420581	2420730	AT1G07810_1	149,	0,	7.58464	7.69255
Chr1	2423415	2423658	AT1G07830_1	243,	0,	3.53847	9.88332
Chr1	2425735	2426124	AT1G07840_1	127,173,	0,216,	2.99388	9.28632
Chr1	2426222	2426629	AT1G07840_2	84,216,	0,191,	8.02353	9.28632
Chr1	2439515	2439615	AT1G07890_1	100,	0,	3.42124	254.574
Chr1	2457076	2457223	AT1G07920_1	147,	0,	2.09685	87.8204
Chr1	2460467	2460668	AT1G07930_1	201,	0,	2.4294	152.655
Chr1	2463046	2463243	AT1G07940_1	197,	0,	5.67171	58.9974
Chr1	2468473	2468571	AT1G07960_1	98,	0,	1.29355	7.97198
Chr1	2468779	2469219	AT1G07960_2	440,	0,	6.24149	7.97198
Chr1	2472359	2472459	AT1G07970_2	100,	0,	1.75686	4.76185
Chr1	2473312	2473461	AT1G07980_1	149,	0,	3.06133	5.53581
Chr1	2474583	2474881	AT1G07980_2	298,	0,	3.13513	5.53581
Chr1	2481228	2481709	AT1G07990_1	69,130,	0,351,	2.41104	9.05214
Chr1	2482651	2483097	AT1G07990_2	446,	0,	9.86261	9.05214
Chr1	2483288	2483486	AT1G08000_1	198,	0,	2.89389	3.52596
Chr1	2485995	2486194	AT1G08010_1	199,	0,	2.54588	6.95057
Chr1	2486440	2486589	AT1G08010_2	149,	0,	1.41805	6.95057
Chr1	2489507	2489881	AT1G08030_1	238,58,	0,316,	4.72957	3.66987
Chr1	2495407	2495836	AT1G08040_1	195,36,16,	0,286,413,	3.8112	13.1087
Chr1	2505282	2505383	AT1G08060_2	101,	0,	2.09357	2.46669
Chr1	2537688	2537883	AT1G08110_1	195,	0,	8.68205	36.8234
Chr1	2539711	2539950	AT1G08125_1	48,99,	0,140,	5.51349	6.70682
Chr1	2542760	2542958	AT1G08130_1	198,	0,	6.51766	9.69277
Chr1	2560237	2560335	AT1G08160_1	98,	0,	1.93498	5.05109
Chr1	2567618	2567818	AT1G08190_1	200,	0,	4.76215	24.5667
Chr1	2573099	2573349	AT1G08190_2	250,	0,	11.528	24.5667
Chr1	2573967	2574267	AT1G08200_1	300,	0,	4.5686	83.7729
Chr1	2577081	2577279	AT1G08210_1	198,	0,	2.33985	4.96496
Chr1	2620479	2620722	AT1G08315_1	243,	0,	1.79926	4.79072
Chr1	2621157	2621303	AT1G08315_2	146,	0,	1.51722	4.79072
Chr1	2632907	2633007	AT1G08350_1	100,	0,	4.77166	2.4855
Chr1	2637665	2637859	AT1G08360_1	194,	0,	5.77703	166.215
Chr1	2639812	2640058	AT1G08370_1	246,	0,	2.09101	8.83558
Chr1	2640205	2640516	AT1G08370_2	40,206,	0,105,	3.55867	8.83558
Chr1	2646291	2646440	AT1G08410_1	149,	0,	2.05484	5.70878
Chr1	2648996	2649341	AT1G08410_2	345,	0,	3.7267	5.70878
Chr1	2656524	2657070	AT1G08420_1	546,	0,	2.31653	16.5077
Chr1	2667996	2668745	AT1G08450_1	23,33,87,57,50,	0,138,291,471,699,	4.24289	46.8676
Chr1	2674226	2674622	AT1G08460_1	396,	0,	2.92288	5.05267
Chr1	2679483	2679581	AT1G08465_1	98,	0,	4.00939	10.8826
Chr1	2682155	2682401	AT1G08470_1	246,	0,	2.69195	10.3076
Chr1	2683876	2683975	AT1G08470_2	99,	0,	1.6344	10.3076
Chr1	2685401	2685602	AT1G08480_1	201,	0,	7.42017	32.8981
Chr1	2685707	2685955	AT1G08490_1	248,	0,	6.99714	21.5664
Chr1	2688361	2688510	AT1G08490_2	149,	0,	1.6406	21.5664
Chr1	2691210	2691659	AT1G08510_1	449,	0,	3.82657	54.5892
Chr1	2698992	2699271	AT1G08520_1	122,78,	0,201,	4.69812	106.906
Chr1	2700772	2700872	AT1G08520_2	100,	0,	6.18251	106.906
Chr1	2702917	2703113	AT1G08530_1	196,	0,	6.82879	6.9368
Chr1	2706509	2706760	AT1G08540_1	251,	0,	9.55587	65.5285
Chr1	2708994	2709491	AT1G08550_1	497,	0,	6.01302	46.3897
Chr1	2710217	2710316	AT1G08560_1	99,	0,	2.11909	15.0303
Chr1	2715183	2715490	AT1G08580_1	174,17,	0,290,	4.0813	27.8211
Chr1	2716199	2716342	AT1G08580_2	143,	0,	2.22151	27.8211
Chr1	2733645	2733995	AT1G08610_1	350,	0,	5.37072	3.36824
Chr1	2748460	2748711	AT1G08640_1	251,	0,	7.05645	30.0958
Chr1	2752221	2752319	AT1G08650_1	98,	0,	2.92797	13.0602
Chr1	2756952	2757396	AT1G08660_1	444,	0,	2.90688	12.2787
Chr1	2759593	2759692	AT1G08660_2	99,	0,	2.2245	12.2787
Chr1	2768370	2768619	AT1G08680_1	249,	0,	5.47021	7.50251
Chr1	2770201	2770348	AT1G08700_1	147,	0,	2.13674	9.39739
Chr1	2772704	2772948	AT1G08710_1	244,	0,	2.09151	3.51176
Chr1	2804266	2804464	AT1G08750_1	198,	0,	5.21245	5.12276
Chr1	2809873	2810115	AT1G08780_1	242,	0,	3.22025	13.8396
Chr1	2813906	2814303	AT1G08800_1	397,	0,	2.58019	2.05684
Chr1	2821552	2821901	AT1G08820_1	349,	0,	7.65526	7.39598
Chr1	2822516	2822617	AT1G08820_2	101,	0,	1.38922	7.39598
Chr1	2829120	2829218	AT1G08830_1	98,	0,	8.52332	192.253
Chr1	2855592	2855692	AT1G08900_1	100,	0,	7.63604	7.19894
Chr1	2859486	2859635	AT1G08910_1	149,	0,	1.6101	3.86965
Chr1	2860183	2860480	AT1G08910_2	297,	0,	2.48068	3.86965
Chr1	2873547	2873697	AT1G08930_1	150,	0,	4.09687	49.1436
Chr1	2876969	2877119	AT1G08930_2	150,	0,	3.64836	49.1436
Chr1	2877869	2878066	AT1G08940_1	197,	0,	3.58227	2.33921
Chr1	2879804	2880103	AT1G08960_1	299,	0,	1.98778	4.46975
Chr1	2882587	2882735	AT1G08970_1	148,	0,	2.6117	13.6122
Chr1	2883854	2883952	AT1G08970_2	98,	0,	5.33955	13.6122
Chr1	2884097	2884245	AT1G08970_3	148,	0,	12.3124	13.6122
Chr1	2899974	2900174	AT1G09020_1	200,	0,	4.66745	18.1182
Chr1	2904612	2904763	AT1G09020_2	151,	0,	1.99715	18.1182
Chr1	2921162	2921262	AT1G09060_1	100,	0,	6.09907	7.55583
Chr1	2936625	2936725	AT1G09100_1	100,	0,	7.12343	9.74354
Chr1	2939714	2939813	AT1G09130_1	99,	0,	9.79515	89.2732
Chr1	2942635	2942832	AT1G09140_1	197,	0,	10.1568	12.4512
Chr1	2948750	2949111	AT1G09150_1	23,221,	0,140,	7.7932	17.1457
Chr1	2952894	2953094	AT1G09160_1	200,	0,	5.0899	10.7905
Chr1	2966217	2966413	AT1G09190_1	196,	0,	2.49722	2.31237
Chr1	2966608	2966804	AT1G09190_2	196,	0,	2.64067	2.31237
Chr1	2970671	2970772	AT1G09195_2	101,	0,	1.80761	1.96723
Chr1	2972047	2972143	AT1G09200_1	96,	0,	1.88169	115.982
Chr1	2979560	2979660	AT1G09230_1	100,	0,	2.65871	5.29978
Chr1	2981362	2981859	AT1G09230_2	36,82,82,	0,178,415,	2.66771	5.29978
Chr1	2994429	2994678	AT1G09270_1	249,	0,	4.12229	19.0141
Chr1	2997775	2998222	AT1G09270_2	447,	0,	5.82527	19.0141
Chr1	2998148	2998345	AT1G09280_1	197,	0,	5.04889	4.718
Chr1	3001537	3001686	AT1G09290_1	149,	0,	5.81085	6.23403
Chr1	3003514	3003713	AT1G09290_2	199,	0,	2.62271	6.23403
Chr1	3003594	3003745	AT1G09300_1	151,	0,	3.38319	3.10705
Chr1	3010820	3011100	AT1G09320_2	65,83,	0,197,	2.31192	3.57817
Chr1	3011718	3011867	AT1G09320_3	149,	0,	1.72684	3.57817
Chr1	3012835	3012982	AT1G09330_1	147,	0,	5.22558	12.8684
Chr1	3018000	3018148	AT1G09340_1	148,	0,	3.37623	334.341
Chr1	3038080	3038268	AT1G09415_1	188,	0,	4.68014	16.1785
Chr1	3038511	3038712	AT1G09420_1	201,	0,	4.90007	14.0964
Chr1	3045046	3045195	AT1G09430_1	149,	0,	8.13386	27.6928
Chr1	3055521	3055902	AT1G09470_2	37,127,79,	0,114,302,	1.669	2.50188
Chr1	3056555	3056803	AT1G09470_3	104,43,	0,205,	2.35301	2.50188
Chr1	3065705	3065852	AT1G09490_1	147,	0,	3.70745	11.2855
Chr1	3079209	3079407	AT1G09530_1	198,	0,	4.48503	2.99436
Chr1	3095308	3095507	AT1G09570_1	199,	0,	5.09969	8.52526
Chr1	3107413	3107704	AT1G09590_1	291,	0,	3.19319	120.557
Chr1	3112926	3113076	AT1G09620_1	150,	0,	4.03719	34.4636
Chr1	3118303	3118403	AT1G09630_1	100,	0,	4.58916	13.7247
Chr1	3122241	3122392	AT1G09640_1	151,	0,	3.03955	93.5055
Chr1	3124328	3124522	AT1G09645_1	194,	0,	4.35197	10.4741
Chr1	3127860	3128060	AT1G09660_1	200,	0,	7.81712	21.9331
Chr1	3136332	3136430	AT1G09690_1	98,	0,	3.22876	198.981
Chr1	3136525	3136623	AT1G09690_2	98,	0,	1.37966	198.981
Chr1	3147835	3148185	AT1G09730_1	350,	0,	4.63811	6.44011
Chr1	3156083	3156230	AT1G09740_1	147,	0,	7.36257	6.33603
Chr1	3157599	3157846	AT1G09750_1	247,	0,	3.09779	188.359
Chr1	3157944	3158142	AT1G09750_2	198,	0,	2.03993	188.359
Chr1	3159273	3159422	AT1G09760_1	149,	0,	9.06288	20.2977
Chr1	3162696	3162946	AT1G09770_1	250,	0,	3.33299	23.5566
Chr1	3164577	3165316	AT1G09770_2	99,551,	0,188,	6.23209	23.5566
Chr1	3165465	3165566	AT1G09770_3	101,	0,	1.80314	23.5566
Chr1	3172144	3172240	AT1G09794_1	96,	0,	4.33394	2.79343
Chr1	3173269	3173462	AT1G09794_2	193,	0,	4.66169	2.79343
Chr1	3176665	3176763	AT1G09795_1	98,	0,	9.22247	57.3209
Chr1	3181075	3181477	AT1G09810_1	224,76,	0,326,	3.41342	3.96478
Chr1	3192764	3192913	AT1G09830_1	149,	0,	6.11511	17.4496
Chr1	3194747	3194945	AT1G09830_2	198,	0,	2.02419	17.4496
Chr1	3195917	3196528	AT1G09840_1	285,14,	0,597,	4.54064	8.7712
Chr1	3203857	3204101	AT1G09850_1	244,	0,	5.3865	14.1849
Chr1	3206392	3206541	AT1G09870_1	149,	0,	1.66717	8.93356
Chr1	3208368	3208615	AT1G09870_2	247,	0,	5.38372	8.93356
Chr1	3224732	3225129	AT1G09920_1	281,14,	0,383,	5.22775	16.3238
Chr1	3237054	3237299	AT1G09940_1	245,	0,	3.35825	7.72651
Chr1	3237445	3237544	AT1G09940_2	99,	0,	1.54186	7.72651
Chr1	3252347	3252548	AT1G09970_1	201,	0,	3.23738	23.9774
Chr1	3255132	3255432	AT1G09970_2	300,	0,	5.20021	23.9774
Chr1	3256336	3256633	AT1G09980_1	297,	0,	7.48726	5.85167
Chr1	3275658	3275855	AT1G10030_1	197,	0,	8.96743	6.95297
Chr1	3283185	3283433	AT1G10050_1	248,	0,	4.63751	3.45907
Chr1	3286798	3286947	AT1G10060_1	149,	0,	1.39089	9.27464
Chr1	3290359	3290656	AT1G10090_1	297,	0,	8.48576	10.246
Chr1	3304087	3304611	AT1G10120_1	163,85,97,	0,253,427,	2.00869	6.66401
Chr1	3305233	3305381	AT1G10120_2	148,	0,	2.47157	6.66401
Chr1	3321920	3322169	AT1G10130_1	249,	0,	12.0133	9.25634
Chr1	3323045	3323243	AT1G10140_1	198,	0,	2.25771	1.84108
Chr1	3333653	3333954	AT1G10170_1	301,	0,	2.56818	8.75766
Chr1	3337001	3337202	AT1G10170_2	201,	0,	1.95936	8.75766
Chr1	3363530	3364024	AT1G10270_1	494,	0,	2.35377	5.18549
Chr1	3370599	3370698	AT1G10290_1	99,	0,	1.64976	26.6787
Chr1	3374726	3375502	AT1G10290_2	26,77,57,39,	0,251,398,737,	1.71817	26.6787
Chr1	3377067	3377364	AT1G10290_3	297,	0,	8.69652	26.6787
Chr1	3381595	3381795	AT1G10310_1	200,	0,	9.41873	15.9972
Chr1	3384166	3384908	AT1G10320_1	742,	0,	4.71816	3.56852
Chr1	3387795	3388376	AT1G10320_2	87,408,	0,173,	15.7038	3.56852
Chr1	3393386	3393584	AT1G10350_1	198,	0,	2.72999	6.61488
Chr1	3395598	3395745	AT1G10360_1	147,	0,	2.9275	39.9627
Chr1	3400701	3400949	AT1G10380_1	248,	0,	1.79393	6.9849
Chr1	3407104	3407701	AT1G10390_1	597,	0,	3.58051	15.9903
Chr1	3416728	3416929	AT1G10410_1	201,	0,	5.63968	7.46612
Chr1	3428526	3428772	AT1G10430_1	246,	0,	4.14502	13.956
Chr1	3436195	3436446	AT1G10450_1	251,	0,	1.73011	3.80069
Chr1	3442487	3442587	AT1G10470_1	100,	0,	2.72333	48.0389
Chr1	3459529	3459773	AT1G10490_1	62,88,	0,156,	1.65795	8.32661
Chr1	3459872	3460172	AT1G10490_2	300,	0,	6.94492	8.32661
Chr1	3465535	3465686	AT1G10510_1	151,	0,	9.2205	24.7873
Chr1	3471191	3471439	AT1G10522_1	248,	0,	6.4538	26.6955
Chr1	3487635	3487736	AT1G10570_1	101,	0,	2.29327	4.24902
Chr1	3491307	3491557	AT1G10580_1	250,	0,	6.79113	16.8122
Chr1	3492886	3493236	AT1G10580_2	350,	0,	7.43801	16.8122
Chr1	3502135	3502235	AT1G10590_1	100,	0,	4.82213	66.5643
Chr1	3505185	3505574	AT1G10600_1	389,	0,	5.143	8.17992
Chr1	3508525	3508859	AT1G10610_2	67,179,	0,155,	4.76278	2.59823
Chr1	3513032	3513180	AT1G10630_1	148,	0,	6.54018	30.2135
Chr1	3517491	3517591	AT1G10640_1	100,	0,	2.19748	8.34885
Chr1	3534889	3535088	AT1G10660_1	199,	0,	4.2558	9.36133
Chr1	3538027	3538223	AT1G10670_1	196,	0,	6.39771	60.4781
Chr1	3556251	3556447	AT1G10700_1	196,	0,	5.678	9.77071
Chr1	3563331	3563528	AT1G10720_1	197,	0,	3.26895	8.21106
Chr1	3564555	3564703	AT1G10720_2	148,	0,	3.78846	8.21106
Chr1	3568247	3568495	AT1G10740_1	248,	0,	6.46919	7.26394
Chr1	3601007	3601254	AT1G10820_1	247,	0,	4.71257	6.57064
Chr1	3605611	3605711	AT1G10830_1	100,	0,	4.8232	14.3576
Chr1	3607280	3607480	AT1G10830_2	200,	0,	2.504	14.3576
Chr1	3607776	3607922	AT1G10840_1	146,	0,	6.89287	44.9473
Chr1	3613038	3613389	AT1G10850_1	351,	0,	3.28071	5.72228
Chr1	3614362	3614613	AT1G10850_2	251,	0,	6.27559	5.72228
Chr1	3614607	3614799	AT1G10865_1	192,	0,	3.99635	8.48681
Chr1	3616758	3616908	AT1G10870_1	150,	0,	9.84877	6.30112
Chr1	3629229	3630609	AT1G10890_1	75,220,355,	0,615,1025,	7.82798	12.8187
Chr1	3635929	3636078	AT1G10900_2	149,	0,	1.60317	3.72378
Chr1	3645716	3645915	AT1G10920_2	199,	0,	3.12474	2.98501
Chr1	3646891	3647040	AT1G10920_3	149,	0,	2.12344	2.98501
Chr1	3647974	3648274	AT1G10930_1	300,	0,	4.5831	6.43524
Chr1	3655870	3656218	AT1G10940_1	348,	0,	10.0358	23.3939
Chr1	3659302	3660365	AT1G10950_1	109,41,	0,1022,	2.02433	43.0051
Chr1	3663618	3663917	AT1G10950_2	299,	0,	4.64443	43.0051
Chr1	3664470	3664566	AT1G10960_1	96,	0,	2.57975	237.154
Chr1	3678323	3678470	AT1G11020_1	147,	0,	3.45104	5.17681
Chr1	3683770	3683920	AT1G11050_2	150,	0,	2.34497	4.17229
Chr1	3725064	3725165	AT1G11130_1	101,	0,	1.62206	5.9503
Chr1	3748263	3748411	AT1G11180_1	148,	0,	3.414	6.56039
Chr1	3755461	3755609	AT1G11200_1	148,	0,	4.12412	6.86033
Chr1	3756253	3756558	AT1G11210_1	8,188,	0,117,	2.61452	10.9186
Chr1	3766802	3767100	AT1G11240_1	298,	0,	4.70163	9.74721
Chr1	3767411	3768120	AT1G11240_2	109,106,33,	0,473,676,	3.178	9.74721
Chr1	3780077	3780178	AT1G11260_1	101,	0,	1.6904	50.7201
Chr1	3787416	3787565	AT1G11280_1	149,	0,	2.99611	5.59854
Chr1	3800650	3800851	AT1G11303_1	201,	0,	4.39768	2.41242
Chr1	3800844	3800992	AT1G11310_1	148,	0,	2.311	40.0865
Chr1	3801090	3801189	AT1G11310_2	99,	0,	1.92108	40.0865
Chr1	3821496	3821693	AT1G11360_1	197,	0,	6.25675	11.565
Chr1	3822060	3822257	AT1G11360_2	197,	0,	2.1143	11.565
Chr1	3822354	3822452	AT1G11360_3	98,	0,	1.71524	11.565
Chr1	3832661	3832959	AT1G11380_1	298,	0,	2.06499	6.81708
Chr1	3833965	3834214	AT1G11380_2	249,	0,	5.07714	6.81708
Chr1	3838084	3838875	AT1G11400_1	78,168,	0,623,	2.10016	4.02283
Chr1	3839999	3840196	AT1G11400_2	197,	0,	11.1939	4.02283
Chr1	3848779	3849076	AT1G11430_1	297,	0,	5.032	108.377
Chr1	3850041	3850240	AT1G11440_1	199,	0,	6.99718	6.78649
Chr1	3863794	3863981	AT1G11475_1	187,	0,	10.4736	24.8511
Chr1	3864141	3864437	AT1G11480_1	296,	0,	7.00113	12.4062
Chr1	3864584	3864733	AT1G11480_2	149,	0,	1.53756	12.4062
Chr1	3866753	3866951	AT1G11480_3	198,	0,	2.76669	12.4062
Chr1	3875251	3875391	AT1G11530_1	140,	0,	4.38867	25.3077
Chr1	3888757	3888856	AT1G11580_1	99,	0,	2.33304	17.1796
Chr1	3889649	3889846	AT1G11580_2	197,	0,	1.40959	17.1796
Chr1	3917893	3918094	AT1G11650_1	201,	0,	8.66191	105.655
Chr1	3923981	3924466	AT1G11660_1	130,219,	0,266,	3.1768	7.61713
Chr1	3946072	3946317	AT1G11700_1	245,	0,	1.87617	12.781
Chr1	3952545	3952846	AT1G11720_1	301,	0,	1.70449	10.4795
Chr1	3953194	3953345	AT1G11720_2	151,	0,	4.33931	10.4795
Chr1	3956793	3956994	AT1G11720_3	201,	0,	7.74639	10.4795
Chr1	3969528	3969628	AT1G11750_1	100,	0,	5.17539	66.908
Chr1	3969728	3969874	AT1G11755_1	146,	0,	4.8385	5.28764
Chr1	3977429	3977627	AT1G11780_1	198,	0,	6.86193	5.27721
Chr1	3985019	3985119	AT1G11790_1	100,	0,	5.17008	13.301
Chr1	3997343	3997819	AT1G11840_1	48,343,	0,133,	4.05495	76.9993
Chr1	3999445	3999542	AT1G11850_1	97,	0,	2.33796	87.1742
Chr1	4003248	4003349	AT1G11860_1	101,	0,	4.1109	542.318
Chr1	4003906	4004056	AT1G11870_1	150,	0,	1.496	14.7826
Chr1	4004551	4004652	AT1G11870_2	101,	0,	1.22884	14.7826
Chr1	4006515	4006716	AT1G11870_3	201,	0,	4.37495	14.7826
Chr1	4012854	4013054	AT1G11890_1	200,	0,	6.57054	24.9718
Chr1	4015896	4015997	AT1G11905_1	101,	0,	2.02943	6.29502
Chr1	4016861	4017112	AT1G11910_1	251,	0,	4.0359	96.8261
Chr1	4030134	4030509	AT1G11930_1	5,289,	0,86,	2.96823	36.505
Chr1	4035562	4035662	AT1G11950_1	100,	0,	2.12908	2.09317
Chr1	4038040	4038189	AT1G11950_2	149,	0,	2.17939	2.09317
Chr1	4039713	4039912	AT1G11960_1	199,	0,	5.41946	3.79674
Chr1	4041691	4042051	AT1G11960_2	56,81,61,	0,135,299,	1.97644	3.79674
Chr1	4050042	4050190	AT1G12000_1	148,	0,	5.46206	28.9521
Chr1	4063101	4063251	AT1G12020_1	150,	0,	1.61144	3.85324
Chr1	4075864	4076108	AT1G12050_1	5,145,	0,99,	8.4393	17.5988
Chr1	4076321	4076465	AT1G12060_1	144,	0,	2.88419	6.01101
Chr1	4084591	4084889	AT1G12080_1	298,	0,	7.23221	45.1376
Chr1	4090458	4090608	AT1G12090_1	150,	0,	1.25243	804.039
Chr1	4109307	4109454	AT1G12110_1	147,	0,	4.68813	21.8251
Chr1	4114870	4115266	AT1G12120_1	396,	0,	2.76463	20.2205
Chr1	4150662	4150958	AT1G12230_1	296,	0,	8.47718	43.5223
Chr1	4158898	4158997	AT1G12244_1	99,	0,	10.0012	8.76445
Chr1	4161207	4161407	AT1G12250_1	200,	0,	6.88308	51.517
Chr1	4172682	4172932	AT1G12270_1	250,	0,	4.7245	18.3696
Chr1	4173365	4173607	AT1G12270_2	42,58,	0,184,	1.75182	18.3696
Chr1	4174580	4174730	AT1G12270_3	150,	0,	9.91375	18.3696
Chr1	4194718	4195524	AT1G12330_1	29,420,	0,386,	3.35258	25.8013
Chr1	4198071	4198215	AT1G12340_1	144,	0,	5.91176	5.40343
Chr1	4200556	4200800	AT1G12350_1	244,	0,	7.15977	24.0876
Chr1	4206092	4206339	AT1G12360_1	247,	0,	9.04627	10.0934
Chr1	4226825	4227156	AT1G12420_1	204,41,	0,290,	2.04195	4.87116
Chr1	4233864	4234437	AT1G12430_1	421,74,	0,499,	3.05767	9.38953
Chr1	4236194	4236694	AT1G12430_2	60,204,34,	0,150,466,	1.86608	9.38953
Chr1	4241664	4241763	AT1G12440_1	99,	0,	1.8129	22.8899
Chr1	4245744	4245844	AT1G12450_1	100,	0,	2.39712	4.61276
Chr1	4257094	4257392	AT1G12470_1	298,	0,	4.81003	7.47937
Chr1	4257316	4257416	AT1G12480_1	100,	0,	5.72265	3.39083
Chr1	4263346	4263594	AT1G12500_1	248,	0,	3.60407	25.8272
Chr1	4264711	4264910	AT1G12500_2	199,	0,	1.75062	25.8272
Chr1	4267171	4267516	AT1G12520_1	345,	0,	4.53724	71.9925
Chr1	4269032	4269365	AT1G12530_1	333,	0,	5.86375	7.04297
Chr1	4274728	4274828	AT1G12550_1	100,	0,	1.43968	4.92937
Chr1	4275584	4275684	AT1G12550_2	100,	0,	1.8876	4.92937
Chr1	4275832	4275932	AT1G12550_3	100,	0,	3.43577	4.92937
Chr1	4285431	4285827	AT1G12580_1	396,	0,	4.1562	7.8142
Chr1	4307072	4307709	AT1G12650_1	49,121,47,132,	0,141,373,505,	4.78169	9.34766
Chr1	4319925	4320221	AT1G12680_1	296,	0,	3.90617	6.91448
Chr1	4321839	4321987	AT1G12680_2	148,	0,	1.4888	6.91448
Chr1	4337357	4337857	AT1G12730_1	16,335,	0,165,	8.36355	2.32871
Chr1	4350545	4350745	AT1G12760_1	200,	0,	2.96164	19.3581
Chr1	4356024	4356306	AT1G12780_1	184,15,	0,267,	2.27557	15.7766
Chr1	4361698	4361846	AT1G12800_1	148,	0,	4.44204	81.0511
Chr1	4364140	4364289	AT1G12800_2	149,	0,	1.77599	81.0511
Chr1	4364386	4364535	AT1G12800_3	149,	0,	1.59308	81.0511
Chr1	4368532	4368774	AT1G12810_1	242,	0,	4.40263	14.7677
Chr1	4368858	4369157	AT1G12820_1	299,	0,	1.62948	14.374
Chr1	4374548	4374844	AT1G12840_1	296,	0,	6.17124	49.8889
Chr1	4378169	4378465	AT1G12840_2	296,	0,	8.41037	49.8889
Chr1	4379792	4379892	AT1G12850_1	100,	0,	3.2255	13.1289
Chr1	4384598	4384796	AT1G12860_1	198,	0,	1.48132	18.1101
Chr1	4390536	4391100	AT1G12880_1	4,150,237,	0,95,327,	3.36028	2.04975
Chr1	4398420	4398816	AT1G12930_1	396,	0,	7.03484	4.32308
Chr1	4405138	4405323	AT1G12930_2	67,32,	0,153,	1.95064	4.32308
Chr1	4405470	4405570	AT1G12930_3	100,	0,	3.14596	4.32308
Chr1	4424035	4424185	AT1G12970_1	150,	0,	2.63055	2.70756
Chr1	4425389	4425589	AT1G12970_2	200,	0,	2.12513	2.70756
Chr1	4436200	4436727	AT1G13000_1	303,36,12,	0,392,515,	4.0129	7.28902
Chr1	4437101	4437287	AT1G13000_2	36,65,	0,121,	1.63302	7.28902
Chr1	4440600	4441306	AT1G13020_1	354,138,	0,568,	3.44845	14.5476
Chr1	4441453	4442577	AT1G13020_2	147,247,	0,877,	1.72858	14.5476
Chr1	4442822	4443069	AT1G13020_3	247,	0,	1.98023	14.5476
Chr1	4444140	4444561	AT1G13030_1	334,9,	0,412,	3.56475	4.02152
Chr1	4445706	4446747	AT1G13030_2	100,78,67,174,169,	0,219,451,622,872,	2.81472	4.02152
Chr1	4450742	4450843	AT1G13050_1	101,	0,	1.50347	1.49843
Chr1	4454606	4454802	AT1G13060_1	196,	0,	8.13061	41.027
Chr1	4469291	4469490	AT1G13120_1	199,	0,	6.16759	5.2956
Chr1	4471313	4471561	AT1G13120_2	248,	0,	3.95539	5.2956
Chr1	4472239	4472339	AT1G13120_3	100,	0,	2.24538	5.2956
Chr1	4487472	4487669	AT1G13160_1	197,	0,	3.58242	10.0056
Chr1	4488232	4488479	AT1G13160_2	247,	0,	3.66023	10.0056
Chr1	4488682	4489382	AT1G13170_1	332,268,	0,432,	3.27609	6.11278
Chr1	4491867	4492018	AT1G13170_2	151,	0,	1.8487	6.11278
Chr1	4500544	4500741	AT1G13190_1	197,	0,	5.34411	14.3295
Chr1	4501034	4501182	AT1G13190_2	148,	0,	2.78515	14.3295
Chr1	4516819	4517343	AT1G13220_1	35,271,45,	0,119,479,	2.50034	3.51894
Chr1	4517691	4518342	AT1G13220_2	651,	0,	4.98128	3.51894
Chr1	4518541	4518641	AT1G13220_3	100,	0,	2.59206	3.51894
Chr1	4529576	4529775	AT1G13250_1	199,	0,	2.35329	13.2147
Chr1	4529923	4530023	AT1G13250_2	100,	0,	1.6888	13.2147
Chr1	4547074	4547224	AT1G13270_1	150,	0,	7.4259	55.9799
Chr1	4563526	4563776	AT1G13320_1	250,	0,	9.2023	21.1884
Chr1	4568789	4569156	AT1G13330_1	7,71,117,	0,93,250,	3.1461	1.60268
Chr1	4572402	4572798	AT1G13350_1	396,	0,	5.29714	8.19196
Chr1	4575149	4575299	AT1G13350_2	150,	0,	2.51317	8.19196
Chr1	4575499	4576365	AT1G13350_3	336,81,127,	0,415,739,	6.97918	8.19196
Chr1	4589140	4589238	AT1G13380_1	98,	0,	2.90317	16.8768
Chr1	4592500	4592847	AT1G13390_1	347,	0,	2.63553	4.76594
Chr1	4612780	4613031	AT1G13450_1	251,	0,	3.8026	4.29474
Chr1	4614502	4614653	AT1G13450_2	151,	0,	1.67168	4.29474
Chr1	4614852	4614953	AT1G13450_3	101,	0,	2.00396	4.29474
Chr1	4615864	4616013	AT1G13460_1	149,	0,	4.2794	4.21246
Chr1	4620390	4620682	AT1G13470_1	292,	0,	5.46995	69.6586
Chr1	4638616	4638950	AT1G13560_1	239,10,	0,324,	4.41822	23.2626
Chr1	4680485	4680829	AT1G13650_1	344,	0,	2.10713	10.1968
Chr1	4694026	4694362	AT1G13690_1	336,	0,	4.98197	15.7945
Chr1	4711122	4711220	AT1G13730_1	98,	0,	2.11496	11.8627
Chr1	4712133	4712525	AT1G13730_2	392,	0,	3.89362	11.8627
Chr1	4714323	4714423	AT1G13740_1	100,	0,	3.0161	5.41588
Chr1	4714763	4714962	AT1G13740_2	199,	0,	4.90658	5.41588
Chr1	4715442	4715591	AT1G13750_1	149,	0,	4.61683	6.87368
Chr1	4724373	4724471	AT1G13770_1	98,	0,	3.15048	3.8471
Chr1	4728850	4729432	AT1G13790_1	79,69,247,	0,164,335,	3.9411	1.78993
Chr1	4737520	4737861	AT1G13820_1	341,	0,	7.29117	38.7247
Chr1	4743401	4743501	AT1G13860_1	100,	0,	3.72564	5.54364
Chr1	4747329	4747474	AT1G13870_1	145,	0,	5.94426	9.06353
Chr1	4761103	4761202	AT1G13930_1	99,	0,	2.29415	1075.62
Chr1	4777824	4777925	AT1G13960_1	101,	0,	1.3877	4.75359
Chr1	4778172	4778553	AT1G13960_2	244,55,	0,326,	3.58571	4.75359
Chr1	4779071	4779271	AT1G13960_3	200,	0,	5.69054	4.75359
Chr1	4795817	4796551	AT1G13990_1	61,163,96,213,	0,97,337,521,	2.69013	15.2056
Chr1	4799989	4800088	AT1G14000_1	99,	0,	5.50773	24.2996
Chr1	4800216	4800410	AT1G14010_1	194,	0,	10.4194	14.0644
Chr1	4804257	4804406	AT1G14020_1	149,	0,	2.07552	7.59936
Chr1	4805078	4805375	AT1G14020_2	297,	0,	7.02529	7.59936
Chr1	4805354	4805502	AT1G14030_1	148,	0,	6.61258	21.7651
Chr1	4817174	4817421	AT1G14060_1	247,	0,	3.51192	6.09408
Chr1	4817568	4817668	AT1G14060_2	100,	0,	3.03766	6.09408
Chr1	4839897	4839996	AT1G14150_1	99,	0,	2.46812	61.3864
Chr1	4840579	4840677	AT1G14150_2	98,	0,	2.0842	61.3864
Chr1	4843331	4843479	AT1G14170_1	148,	0,	4.85582	11.6914
Chr1	4848921	4849119	AT1G14180_1	198,	0,	2.90848	3.14938
Chr1	4854513	4854900	AT1G14200_1	387,	0,	4.22892	6.25739
Chr1	4856824	4856968	AT1G14210_1	144,	0,	1.71029	7.287
Chr1	4857062	4857283	AT1G14210_2	120,23,	0,198,	2.3585	7.287
Chr1	4863894	4863994	AT1G14230_1	100,	0,	6.16292	6.2991
Chr1	4874923	4875072	AT1G14270_1	149,	0,	10.9762	23.7749
Chr1	4880078	4880327	AT1G14290_1	249,	0,	5.27249	7.62375
Chr1	4882483	4882682	AT1G14300_1	199,	0,	3.45118	5.52522
Chr1	4886491	4886744	AT1G14310_1	10,139,	0,114,	5.95844	7.58316
Chr1	4889411	4889558	AT1G14320_1	147,	0,	3.8334	297.811
Chr1	4890216	4890315	AT1G14330_1	99,	0,	3.14619	4.75034
Chr1	4890462	4890610	AT1G14330_2	148,	0,	1.38257	4.75034
Chr1	4890708	4890856	AT1G14330_3	148,	0,	1.24107	4.75034
Chr1	4898792	4898938	AT1G14340_1	146,	0,	11.4003	9.28437
Chr1	4899236	4899381	AT1G14345_1	145,	0,	3.5715	87.2895
Chr1	4908269	4908872	AT1G14350_1	250,47,53,	0,337,550,	4.74859	5.39064
Chr1	4911237	4911383	AT1G14360_1	146,	0,	4.13643	8.12756
Chr1	4917939	4918138	AT1G14370_1	199,	0,	7.63295	3.49212
Chr1	4927082	4927331	AT1G14400_1	249,	0,	5.27687	42.5438
Chr1	4929169	4929319	AT1G14410_1	150,	0,	4.10398	20.5914
Chr1	4939148	4939297	AT1G14440_1	149,	0,	2.03826	7.81112
Chr1	4939395	4939594	AT1G14440_2	199,	0,	1.94821	7.81112
Chr1	4946284	4947343	AT1G14450_1	204,31,	0,1028,	5.9279	6.24266
Chr1	4961942	4962342	AT1G14510_1	400,	0,	2.05168	15.4433
Chr1	4968182	4968381	AT1G14520_1	199,	0,	2.51169	4.1717
Chr1	4969436	4970014	AT1G14520_2	181,118,97,	0,254,481,	1.48763	4.1717
Chr1	4983067	4983218	AT1G14560_1	151,	0,	2.89975	4.41912
Chr1	4990108	4990733	AT1G14580_1	148,250,	0,375,	2.06051	7.42989
Chr1	4991860	4992010	AT1G14580_2	150,	0,	1.84222	7.42989
Chr1	4998866	4999016	AT1G14590_1	150,	0,	5.10214	4.96913
Chr1	5008351	5008851	AT1G14610_1	325,73,	0,427,	3.87479	22.7921
Chr1	5013429	5014215	AT1G14610_2	37,63,49,	0,163,737,	4.55677	22.7921
Chr1	5014822	5014970	AT1G14620_1	148,	0,	10.32	9.33259
Chr1	5028866	5029315	AT1G14650_1	449,	0,	3.8456	13.5916
Chr1	5030496	5030746	AT1G14650_2	250,	0,	5.40355	13.5916
Chr1	5040251	5040400	AT1G14670_1	149,	0,	3.25909	50.0819
Chr1	5048315	5048462	AT1G14687_1	147,	0,	4.63485	2.52748
Chr1	5051852	5052050	AT1G14690_1	198,	0,	4.60725	8.44033
Chr1	5052196	5052582	AT1G14690_2	232,65,	0,321,	2.92024	8.44033
Chr1	5060891	5061090	AT1G14700_1	199,	0,	2.47025	12.8246
Chr1	5061942	5062341	AT1G14710_1	399,	0,	5.74076	21.4072
Chr1	5062439	5062589	AT1G14710_2	150,	0,	2.80875	21.4072
Chr1	5063841	5064258	AT1G14710_3	89,111,	0,306,	3.37416	21.4072
Chr1	5066723	5066873	AT1G14720_1	150,	0,	3.84837	31.4497
Chr1	5075376	5075872	AT1G14740_1	496,	0,	5.16358	18.1596
Chr1	5102572	5102721	AT1G14810_1	149,	0,	8.96114	57.7709
Chr1	5104502	5104652	AT1G14810_2	150,	0,	2.39368	57.7709
Chr1	5105172	5105371	AT1G14820_1	199,	0,	5.46413	8.79213
Chr1	5107513	5107759	AT1G14830_1	246,	0,	6.07633	22.8569
Chr1	5112149	5112399	AT1G14840_1	250,	0,	3.87527	6.98511
Chr1	5112635	5112930	AT1G14840_2	94,106,	0,189,	2.24127	6.98511
Chr1	5113919	5114175	AT1G14840_3	99,51,	0,205,	1.41035	6.98511
Chr1	5139809	5139958	AT1G14910_1	149,	0,	4.73256	13.5037
Chr1	5165636	5165932	AT1G14980_1	296,	0,	4.26151	38.0943
Chr1	5167205	5167352	AT1G14990_1	147,	0,	6.71067	6.20379
Chr1	5168657	5168804	AT1G15000_1	147,	0,	1.5751	11.6713
Chr1	5169580	5169823	AT1G15000_2	243,	0,	2.01452	11.6713
Chr1	5173106	5173506	AT1G15020_1	400,	0,	6.80988	4.97262
Chr1	5179852	5180000	AT1G15030_1	148,	0,	7.88073	12.0347
Chr1	5183680	5183927	AT1G15060_1	247,	0,	3.72327	6.86034
Chr1	5186711	5186909	AT1G15060_2	198,	0,	1.98566	6.86034
Chr1	5194066	5194165	AT1G15100_1	99,	0,	2.50742	4.48913
Chr1	5203895	5204145	AT1G15120_1	250,	0,	10.8205	48.4214
Chr1	5204791	5205167	AT1G15125_1	258,42,	0,334,	2.18561	6.51573
Chr1	5205614	5205914	AT1G15125_2	300,	0,	1.50119	6.51573
Chr1	5206051	5206251	AT1G15130_1	200,	0,	6.48358	14.299
Chr1	5206349	5206500	AT1G15130_2	151,	0,	2.77231	14.299
Chr1	5210279	5210479	AT1G15140_1	200,	0,	5.56778	81.5349
Chr1	5211951	5212151	AT1G15140_2	200,	0,	3.06391	81.5349
Chr1	5226529	5226679	AT1G15180_1	150,	0,	4.57378	4.98838
Chr1	5228445	5228970	AT1G15200_1	436,4,	0,521,	7.81516	26.241
Chr1	5242716	5242965	AT1G15230_1	249,	0,	5.40662	9.40392
Chr1	5245433	5245584	AT1G15240_1	151,	0,	1.77172	5.5932
Chr1	5248442	5248693	AT1G15240_2	251,	0,	6.02866	5.5932
Chr1	5249950	5250143	AT1G15260_1	193,	0,	1.79758	24.5664
Chr1	5250697	5250889	AT1G15270_1	192,	0,	5.55484	150.667
Chr1	5252611	5253571	AT1G15280_1	324,100,26,	0,676,934,	3.5476	12.6048
Chr1	5256513	5256713	AT1G15280_2	200,	0,	9.41859	12.6048
Chr1	5275763	5276752	AT1G15340_1	989,	0,	8.412	41.3166
Chr1	5288346	5288542	AT1G15370_1	196,	0,	4.84351	16.6992
Chr1	5295633	5295733	AT1G15390_1	100,	0,	9.29376	22.6788
Chr1	5296247	5296394	AT1G15400_1	147,	0,	1.56377	12.8978
Chr1	5301661	5301954	AT1G15420_1	293,	0,	5.7227	10.2317
Chr1	5306125	5306275	AT1G15440_1	150,	0,	4.89271	8.72246
Chr1	5308513	5308713	AT1G15440_2	200,	0,	2.73429	8.72246
Chr1	5317644	5317842	AT1G15470_1	198,	0,	4.34188	8.84819
Chr1	5320664	5320863	AT1G15490_1	199,	0,	5.41879	2.66979
Chr1	5328626	5328825	AT1G15500_1	199,	0,	3.50003	72.3108
Chr1	5331211	5331411	AT1G15510_1	200,	0,	1.92755	5.00046
Chr1	5340009	5340306	AT1G15530_1	297,	0,	4.85302	6.01311
Chr1	5341487	5341931	AT1G15530_2	444,	0,	2.42279	6.01311
Chr1	5345899	5345999	AT1G15550_1	100,	0,	1.97346	2.8918
Chr1	5363135	5363396	AT1G15570_1	114,36,	0,225,	1.94799	5.03999
Chr1	5383546	5383954	AT1G15660_1	65,70,15,	0,155,393,	1.96963	6.06126
Chr1	5384444	5384595	AT1G15660_2	151,	0,	5.16503	6.06126
Chr1	5402282	5402383	AT1G15690_1	101,	0,	2.18881	434.093
Chr1	5404426	5404723	AT1G15710_1	297,	0,	2.135	9.07179
Chr1	5404821	5404971	AT1G15710_2	150,	0,	1.64018	9.07179
Chr1	5407450	5407649	AT1G15730_1	199,	0,	7.87222	22.4908
Chr1	5414469	5414869	AT1G15740_1	400,	0,	8.52981	9.31998
Chr1	5414916	5415116	AT1G15750_1	200,	0,	4.08737	18.571
Chr1	5445059	5445258	AT1G15810_1	199,	0,	3.23597	10.8385
Chr1	5446267	5446465	AT1G15810_2	198,	0,	2.90539	10.8385
Chr1	5449438	5450175	AT1G15830_1	737,	0,	5.81309	3.47704
Chr1	5456775	5456874	AT1G15860_1	99,	0,	5.73572	18.64
Chr1	5458183	5458380	AT1G15870_1	197,	0,	5.71238	4.02786
Chr1	5458591	5458957	AT1G15880_1	240,4,	0,362,	4.97343	5.21758
Chr1	5467521	5468126	AT1G15910_1	197,54,	0,551,	4.50074	9.32309
Chr1	5468274	5469130	AT1G15910_2	11,638,	0,218,	5.60097	9.32309
Chr1	5472753	5472901	AT1G15930_1	148,	0,	6.29382	124.872
Chr1	5477207	5478206	AT1G15940_1	999,	0,	5.60439	3.71191
Chr1	5481763	5482159	AT1G15960_1	396,	0,	3.51619	1.25024
Chr1	5486370	5486617	AT1G15970_1	247,	0,	7.05838	8.50001
Chr1	5491117	5491265	AT1G15980_1	148,	0,	4.62963	119.631
Chr1	5495125	5495266	AT1G16000_1	141,	0,	3.12813	22.1815
Chr1	5501061	5501309	AT1G16020_1	248,	0,	12.2753	7.88512
Chr1	5506372	5506618	AT1G16040_1	246,	0,	5.78981	3.15625
Chr1	5515778	5515928	AT1G16080_1	150,	0,	6.43325	122.691
Chr1	5519828	5519979	AT1G16110_1	151,	0,	2.68711	2.52636
Chr1	5538814	5538914	AT1G16170_1	100,	0,	3.14806	7.92268
Chr1	5542601	5542802	AT1G16180_1	201,	0,	3.21301	39.7437
Chr1	5545854	5546053	AT1G16190_1	199,	0,	6.034	8.12089
Chr1	5546147	5546508	AT1G16210_1	231,12,	0,349,	4.17252	24.9604
Chr1	5547072	5547413	AT1G16210_2	341,	0,	2.75931	24.9604
Chr1	5555089	5555189	AT1G16240_1	100,	0,	6.66023	20.6935
Chr1	5565031	5565378	AT1G16270_1	347,	0,	1.81112	3.54986
Chr1	5568134	5568904	AT1G16280_1	500,90,	0,680,	3.0397	4.86326
Chr1	5587869	5588019	AT1G16340_1	150,	0,	4.03785	9.19098
Chr1	5591562	5591860	AT1G16350_1	298,	0,	2.81404	24.2831
Chr1	5592899	5592999	AT1G16350_2	100,	0,	3.43965	24.2831
Chr1	5608879	5609029	AT1G16410_1	150,	0,	1.9397	51.4232
Chr1	5615329	5615471	AT1G16430_1	142,	0,	1.76357	4.15128
Chr1	5618201	5618527	AT1G16445_1	5,92,	0,234,	1.58754	3.544
Chr1	5619216	5619408	AT1G16445_2	192,	0,	2.63538	3.544
Chr1	5619693	5619892	AT1G16460_1	199,	0,	8.24449	26.3426
Chr1	5625290	5625585	AT1G16470_1	3,195,	0,100,	3.97698	32.0123
Chr1	5650314	5650412	AT1G16520_1	98,	0,	1.54556	8.45843
Chr1	5650922	5651167	AT1G16520_2	245,	0,	6.31884	8.45843
Chr1	5670625	5670774	AT1G16570_1	149,	0,	9.84777	4.43581
Chr1	5675691	5676037	AT1G16610_1	346,	0,	10.316	16.5747
Chr1	5682818	5682918	AT1G16630_1	100,	0,	2.03908	3.0854
Chr1	5683067	5683267	AT1G16630_2	200,	0,	2.2463	3.0854
Chr1	5683763	5683864	AT1G16630_3	101,	0,	2.81766	3.0854
Chr1	5684609	5684710	AT1G16630_4	101,	0,	1.92975	3.0854
Chr1	5705542	5705842	AT1G16680_1	300,	0,	5.08998	6.04208
Chr1	5708998	5709213	AT1G16690_1	49,52,	0,163,	1.49007	3.41988
Chr1	5711656	5711850	AT1G16700_1	194,	0,	10.9513	27.102
Chr1	5717838	5717938	AT1G16710_1	100,	0,	1.66562	3.81309
Chr1	5719895	5719996	AT1G16710_2	101,	0,	2.6002	3.81309
Chr1	5721717	5722066	AT1G16710_3	349,	0,	3.40583	3.81309
Chr1	5723338	5723439	AT1G16720_1	101,	0,	1.87285	52.7637
Chr1	5726178	5726378	AT1G16720_2	200,	0,	4.2008	52.7637
Chr1	5727720	5727920	AT1G16740_1	200,	0,	4.81209	23.0009
Chr1	5728915	5729065	AT1G16740_2	150,	0,	4.56059	23.0009
Chr1	5756199	5756798	AT1G16810_1	98,391,	0,208,	5.32985	37.3722
Chr1	5762792	5762992	AT1G16840_1	200,	0,	1.749	25.6498
Chr1	5763935	5764035	AT1G16840_2	100,	0,	2.08125	25.6498
Chr1	5765004	5765204	AT1G16850_1	200,	0,	1.76787	8.84774
Chr1	5767397	5768209	AT1G16860_1	244,2,	0,810,	3.29824	24.2945
Chr1	5769870	5770111	AT1G16860_2	27,121,	0,120,	1.79313	24.2945
Chr1	5770258	5770455	AT1G16860_3	197,	0,	6.8612	24.2945
Chr1	5776111	5776259	AT1G16880_1	148,	0,	2.25482	209.98
Chr1	5776371	5776566	AT1G16890_1	195,	0,	6.29506	37.8022
Chr1	5779107	5779357	AT1G16900_1	250,	0,	12.5424	6.45354
Chr1	5786605	5786752	AT1G16916_1	147,	0,	2.9867	4.77356
Chr1	5787389	5787583	AT1G16920_1	194,	0,	4.31152	20.2087
Chr1	5800206	5800378	AT1G16960_1	78,19,	0,153,	1.28987	8.58284
Chr1	5800965	5801266	AT1G16970_1	301,	0,	6.37838	4.62428
Chr1	5831133	5831283	AT1G17050_1	150,	0,	7.83558	8.91185
Chr1	5837938	5838687	AT1G17070_1	749,	0,	4.67384	5.26753
Chr1	5838786	5838886	AT1G17070_2	100,	0,	2.31528	5.26753
Chr1	5840364	5840461	AT1G17080_1	97,	0,	4.28219	19.6873
Chr1	5845723	5846268	AT1G17110_1	545,	0,	6.33504	7.74893
Chr1	5855181	5855962	AT1G17130_1	91,66,51,85,	0,233,549,696,	2.35163	16.7633
Chr1	5856165	5856600	AT1G17130_2	8,334,	0,101,	3.24419	16.7633
Chr1	5856721	5856872	AT1G17140_1	151,	0,	3.27633	18.8304
Chr1	5856971	5857470	AT1G17140_2	499,	0,	3.63943	18.8304
Chr1	5860175	5860373	AT1G17145_1	198,	0,	4.69066	4.36877
Chr1	5861424	5861621	AT1G17145_2	62,37,	0,160,	2.04886	4.36877
Chr1	5880245	5880396	AT1G17210_1	151,	0,	16.5997	10.377
Chr1	5881376	5881477	AT1G17210_2	101,	0,	1.65642	10.377
Chr1	5916930	5917130	AT1G17280_1	200,	0,	6.08392	6.36617
Chr1	5917278	5917379	AT1G17280_2	101,	0,	1.83307	6.36617
Chr1	5922826	5922976	AT1G17290_1	150,	0,	2.29042	73.4243
Chr1	5926102	5926350	AT1G17290_2	248,	0,	2.45928	73.4243
Chr1	5931400	5931678	AT1G17330_1	29,170,	0,108,	2.97584	4.90763
Chr1	5938418	5938568	AT1G17340_1	150,	0,	5.78805	4.73999
Chr1	5944215	5944415	AT1G17350_1	200,	0,	6.37636	3.05606
Chr1	5950171	5950271	AT1G17360_1	100,	0,	1.75025	5.04355
Chr1	5950519	5950620	AT1G17360_2	101,	0,	1.57079	5.04355
Chr1	5951640	5951838	AT1G17370_1	198,	0,	4.11972	20.8393
Chr1	5981172	5981372	AT1G17420_1	200,	0,	2.2518	6.23298
Chr1	5982773	5982919	AT1G17430_1	146,	0,	2.47234	8.52013
Chr1	5984083	5984333	AT1G17440_1	250,	0,	5.11542	11.4932
Chr1	5985493	5985794	AT1G17440_2	301,	0,	2.7344	11.4932
Chr1	5987184	5987635	AT1G17440_3	451,	0,	3.55383	11.4932
Chr1	5998310	5998407	AT1G17455_1	97,	0,	3.56527	7.04836
Chr1	6008628	6009084	AT1G17490_1	71,122,	0,334,	3.16608	13.6213
Chr1	6009179	6009276	AT1G17490_2	97,	0,	1.80789	13.6213
Chr1	6023053	6023503	AT1G17500_1	450,	0,	3.97806	4.47714
Chr1	6024732	6025371	AT1G17520_1	258,279,	0,360,	4.88887	5.00035
Chr1	6027175	6027322	AT1G17520_2	147,	0,	2.95283	5.00035
Chr1	6027683	6027782	AT1G17530_1	99,	0,	1.35033	9.83746
Chr1	6036799	6037249	AT1G17550_1	450,	0,	4.39685	13.3014
Chr1	6037554	6037705	AT1G17560_1	151,	0,	4.24056	10.3208
Chr1	6041091	6041192	AT1G17580_1	101,	0,	2.18523	5.11862
Chr1	6049285	6049535	AT1G17580_2	250,	0,	7.07118	5.11862
Chr1	6062579	6062726	AT1G17620_1	147,	0,	2.05676	19.5516
Chr1	6062921	6063069	AT1G17620_2	148,	0,	1.23948	19.5516
Chr1	6073980	6074179	AT1G17665_1	199,	0,	3.92406	15.2758
Chr1	6074277	6074426	AT1G17665_2	149,	0,	3.24498	15.2758
Chr1	6076419	6076670	AT1G17680_1	251,	0,	2.02814	4.52434
Chr1	6080411	6080655	AT1G17680_2	37,114,	0,130,	2.20317	4.52434
Chr1	6082821	6083139	AT1G17690_1	131,19,	0,299,	4.63911	5.74259
Chr1	6087154	6087826	AT1G17690_2	99,125,26,	0,263,646,	4.37032	5.74259
Chr1	6089606	6089948	AT1G17700_1	342,	0,	2.08112	2.94304
Chr1	6093434	6094084	AT1G17720_1	650,	0,	3.44988	19.9147
Chr1	6100103	6100299	AT1G17730_1	196,	0,	9.10629	14.111
Chr1	6101558	6101658	AT1G17745_1	100,	0,	1.75546	8.20441
Chr1	6104801	6105099	AT1G17745_2	298,	0,	1.71179	8.20441
Chr1	6110155	6110625	AT1G17760_1	225,71,	0,399,	3.80031	3.30708
Chr1	6125091	6125191	AT1G17780_1	100,	0,	4.29512	2.25309
Chr1	6126880	6126979	AT1G17790_2	99,	0,	2.01802	2.68811
Chr1	6131585	6132029	AT1G17820_1	444,	0,	5.50912	4.91264
Chr1	6145977	6146225	AT1G17840_1	248,	0,	5.1251	31.0534
Chr1	6145974	6146269	AT1G17850_1	295,	0,	5.02155	5.32631
Chr1	6152477	6152620	AT1G17880_1	143,	0,	3.91264	150.12
Chr1	6166991	6167091	AT1G17930_2	100,	0,	2.28074	2.95699
Chr1	6184965	6185165	AT1G17970_1	200,	0,	2.66049	7.07236
Chr1	6185363	6185464	AT1G17970_2	101,	0,	2.16664	7.07236
Chr1	6187149	6187300	AT1G17970_3	151,	0,	3.24075	7.07236
Chr1	6191313	6191610	AT1G17980_2	297,	0,	2.60107	7.14249
Chr1	6211930	6212129	AT1G18060_1	199,	0,	9.75374	61.434
Chr1	6213799	6214049	AT1G18070_1	250,	0,	9.13384	38.2136
Chr1	6216450	6216826	AT1G18070_2	36,46,69,	0,178,307,	1.92032	38.2136
Chr1	6223891	6224042	AT1G18080_1	151,	0,	4.74604	235.322
Chr1	6227475	6227723	AT1G18090_1	248,	0,	6.88136	2.51071
Chr1	6253831	6254030	AT1G18160_1	199,	0,	7.30173	7.60494
Chr1	6254531	6255248	AT1G18170_1	91,45,108,	0,237,609,	1.97596	36.4854
Chr1	6255441	6255685	AT1G18170_2	244,	0,	5.6991	36.4854
Chr1	6259730	6259995	AT1G18190_1	30,121,	0,144,	5.70338	3.34513
Chr1	6278886	6279086	AT1G18260_1	200,	0,	5.33381	12.7478
Chr1	6282329	6282718	AT1G18265_1	389,	0,	3.03843	6.85358
Chr1	6283518	6283718	AT1G18270_1	200,	0,	6.98273	5.90239
Chr1	6300496	6300646	AT1G18300_1	150,	0,	1.73866	2.63514
Chr1	6311540	6311687	AT1G18340_1	147,	0,	6.9212	4.8026
Chr1	6316842	6316990	AT1G18360_1	148,	0,	4.83158	13.4996
Chr1	6319697	6319847	AT1G18370_1	150,	0,	5.01289	3.623
Chr1	6319945	6320045	AT1G18370_2	100,	0,	2.13212	3.623
Chr1	6320426	6320604	AT1G18370_3	46,54,	0,124,	1.83875	3.623
Chr1	6331546	6331646	AT1G18400_1	100,	0,	2.32438	4.38543
Chr1	6331794	6332678	AT1G18400_2	26,126,66,32,	0,129,356,852,	2.96905	4.38543
Chr1	6347493	6347818	AT1G18440_1	4,246,	0,79,	2.84774	9.42409
Chr1	6351812	6351912	AT1G18450_1	100,	0,	9.17527	14.7559
Chr1	6355965	6356113	AT1G18460_1	148,	0,	3.00243	5.06194
Chr1	6355994	6356444	AT1G18470_1	450,	0,	4.56933	9.91349
Chr1	6365568	6365718	AT1G18485_1	150,	0,	1.9472	5.14333
Chr1	6366014	6366164	AT1G18485_2	150,	0,	2.46321	5.14333
Chr1	6368581	6368731	AT1G18490_1	150,	0,	5.41432	5.75958
Chr1	6369314	6369665	AT1G18500_1	351,	0,	3.52337	21.6544
Chr1	6372780	6373030	AT1G18500_2	250,	0,	11.6619	21.6544
Chr1	6377384	6377736	AT1G18540_1	219,31,	0,321,	2.88404	166.193
Chr1	6397930	6398176	AT1G18580_1	246,	0,	3.42349	6.35055
Chr1	6400726	6400826	AT1G18600_1	100,	0,	1.70818	8.66036
Chr1	6402546	6402745	AT1G18600_2	199,	0,	7.01601	8.66036
Chr1	6414023	6414371	AT1G18620_1	348,	0,	2.34286	10.8694
Chr1	6416217	6416459	AT1G18630_1	242,	0,	11.1457	9.07884
Chr1	6416266	6416611	AT1G18640_1	345,	0,	10.653	12.5424
Chr1	6418887	6419037	AT1G18650_1	150,	0,	2.97368	11.8887
Chr1	6420442	6420543	AT1G18650_2	101,	0,	1.75705	11.8887
Chr1	6425552	6425800	AT1G18660_1	248,	0,	7.23464	12.3589
Chr1	6432034	6432181	AT1G18680_1	147,	0,	6.85172	3.95067
Chr1	6434354	6434703	AT1G18690_1	349,	0,	5.86612	1.71615
Chr1	6437623	6437724	AT1G18700_1	101,	0,	1.66355	7.75267
Chr1	6442754	6443085	AT1G18700_2	71,180,	0,151,	5.19841	7.75267
Chr1	6452771	6452919	AT1G18710_1	148,	0,	5.20243	2.76653
Chr1	6457873	6458072	AT1G18720_1	199,	0,	3.05088	43.6281
Chr1	6459536	6459685	AT1G18720_2	149,	0,	1.55339	43.6281
Chr1	6462051	6462295	AT1G18730_1	244,	0,	9.01905	62.0078
Chr1	6465031	6465131	AT1G18740_1	100,	0,	1.48351	12.3345
Chr1	6481305	6481914	AT1G18800_1	220,48,24,	0,441,585,	4.93446	21.2173
Chr1	6482095	6482407	AT1G18800_2	5,62,31,	0,127,281,	2.13724	21.2173
Chr1	6500852	6501051	AT1G18840_1	199,	0,	2.76049	5.81476
Chr1	6501490	6501689	AT1G18840_2	199,	0,	2.62747	5.81476
Chr1	6503012	6503436	AT1G18840_3	68,82,	0,342,	1.7958	5.81476
Chr1	6504773	6504969	AT1G18850_1	196,	0,	1.8622	6.43248
Chr1	6505649	6505795	AT1G18850_2	146,	0,	1.8373	6.43248
Chr1	6546724	6546825	AT1G18950_1	101,	0,	3.84805	7.29387
Chr1	6550861	6551161	AT1G18950_2	300,	0,	4.97719	7.29387
Chr1	6551259	6551510	AT1G18950_3	251,	0,	3.70461	7.29387
Chr1	6551758	6552008	AT1G18950_4	250,	0,	6.43004	7.29387
Chr1	6562158	6562449	AT1G19000_1	33,66,	0,225,	1.41765	57.3671
Chr1	6601055	6601305	AT1G19100_2	250,	0,	7.08112	3.83182
Chr1	6605244	6605480	AT1G19110_1	51,50,	0,186,	2.61304	11.7
Chr1	6605728	6605928	AT1G19110_2	200,	0,	3.54008	11.7
Chr1	6609129	6609369	AT1G19120_1	240,	0,	6.90604	14.7141
Chr1	6609372	6609515	AT1G19130_1	143,	0,	4.43801	20.731
Chr1	6610797	6611090	AT1G19140_1	293,	0,	7.11332	6.63338
Chr1	6618808	6618907	AT1G19170_1	99,	0,	5.93155	5.59916
Chr1	6623034	6623181	AT1G19180_1	147,	0,	1.84172	3.73309
Chr1	6649341	6649541	AT1G19240_1	200,	0,	6.89199	6.28341
Chr1	6663681	6663987	AT1G19270_1	34,165,	0,141,	2.02739	4.60401
Chr1	6671886	6672282	AT1G19300_1	396,	0,	2.74586	7.59718
Chr1	6672380	6672480	AT1G19300_2	100,	0,	1.98793	7.59718
Chr1	6676307	6676454	AT1G19310_1	147,	0,	3.90422	9.31956
Chr1	6680617	6680862	AT1G19330_1	245,	0,	6.31721	6.86375
Chr1	6688860	6688960	AT1G19350_1	100,	0,	2.03754	26.907
Chr1	6689475	6689774	AT1G19350_2	299,	0,	1.55773	26.907
Chr1	6690171	6690321	AT1G19350_3	150,	0,	1.4556	26.907
Chr1	6690569	6690719	AT1G19350_4	150,	0,	3.14454	26.907
Chr1	6690594	6690743	AT1G19360_1	149,	0,	2.93038	6.3348
Chr1	6712070	6712219	AT1G19400_1	149,	0,	5.33566	3.31533
Chr1	6712316	6712416	AT1G19400_2	100,	0,	1.6147	3.31533
Chr1	6724560	6724808	AT1G19430_1	248,	0,	5.33838	7.85509
Chr1	6726839	6727235	AT1G19430_2	396,	0,	4.10638	7.85509
Chr1	6730583	6730832	AT1G19440_1	249,	0,	2.12763	16.249
Chr1	6777120	6777419	AT1G19580_1	299,	0,	7.8571	14.8998
Chr1	6780923	6781023	AT1G19600_1	100,	0,	4.64793	17.0814
Chr1	6800065	6800399	AT1G19660_1	203,42,	0,292,	2.61694	42.5526
Chr1	6807713	6807862	AT1G19680_1	149,	0,	7.73452	5.30503
Chr1	6807764	6808015	AT1G19690_1	251,	0,	3.96161	9.21401
Chr1	6810125	6810274	AT1G19700_2	149,	0,	2.4183	3.23787
Chr1	6811833	6811981	AT1G19700_3	148,	0,	1.7937	3.23787
Chr1	6816630	6816876	AT1G19710_1	246,	0,	5.61129	5.37183
Chr1	6816751	6816902	AT1G19715_1	151,	0,	5.21303	16.3232
Chr1	6823040	6823186	AT1G19730_1	146,	0,	4.53318	8.32341
Chr1	6824439	6824683	AT1G19740_1	244,	0,	3.18579	81.4725
Chr1	6825167	6825410	AT1G19740_2	243,	0,	2.65345	81.4725
Chr1	6832422	6832860	AT1G19770_1	46,297,	0,141,	3.72204	26.0652
Chr1	6847884	6848031	AT1G19800_1	147,	0,	3.46218	17.1171
Chr1	6852213	6852311	AT1G19830_1	98,	0,	1.78944	1.26982
Chr1	6895107	6895355	AT1G19870_1	248,	0,	4.96049	12.2066
Chr1	6895694	6895992	AT1G19870_2	298,	0,	2.65695	12.2066
Chr1	6897680	6897829	AT1G19870_3	149,	0,	1.26355	12.2066
Chr1	6900484	6901221	AT1G19880_1	495,34,13,	0,570,724,	2.26078	15.7074
Chr1	6914343	6914489	AT1G19910_1	146,	0,	3.73946	53.1403
Chr1	6914664	6914861	AT1G19920_1	197,	0,	3.57261	33.8032
Chr1	6916528	6916725	AT1G19920_2	197,	0,	2.03638	33.8032
Chr1	6925853	6926595	AT1G19950_1	29,557,	0,185,	3.11877	5.30616
Chr1	6931059	6931206	AT1G19970_1	147,	0,	6.51531	3.59299
Chr1	6935413	6935512	AT1G19990_1	99,	0,	2.93221	7.1968
Chr1	6935609	6935953	AT1G19990_2	2,96,50,	0,108,294,	4.14043	7.1968
Chr1	6936584	6936781	AT1G19990_3	197,	0,	7.50288	7.1968
Chr1	6938013	6938112	AT1G20010_1	99,	0,	4.16726	158.095
Chr1	6950072	6950315	AT1G20050_1	243,	0,	3.71855	23.5838
Chr1	6968517	6968862	AT1G20090_1	345,	0,	3.1691	33.3203
Chr1	6970003	6970641	AT1G20100_1	176,23,	0,615,	2.35158	23.2995
Chr1	6971572	6972071	AT1G20110_1	499,	0,	2.37652	18.86
Chr1	6974062	6974782	AT1G20110_2	67,282,	0,438,	6.46593	18.86
Chr1	7001284	7001533	AT1G20200_1	249,	0,	3.88044	33.1485
Chr1	7004969	7005067	AT1G20220_1	98,	0,	10.8372	30.8747
Chr1	7005341	7006334	AT1G20220_2	154,57,57,75,65,30,	0,273,437,611,773,963,	6.37296	30.8747
Chr1	7007852	7008048	AT1G20225_1	196,	0,	4.33096	26.0282
Chr1	7020296	7020543	AT1G20260_1	247,	0,	15.2837	78.9306
Chr1	7020809	7021004	AT1G20270_1	195,	0,	4.81247	4.48398
Chr1	7029726	7030118	AT1G20300_1	392,	0,	3.26464	4.80896
Chr1	7039208	7039306	AT1G20330_1	98,	0,	1.87707	82.1262
Chr1	7043192	7043292	AT1G20340_1	100,	0,	3.11141	2087.6
Chr1	7064992	7065093	AT1G20380_1	101,	0,	3.15766	3.15781
Chr1	7079000	7079099	AT1G20410_1	99,	0,	2.08122	5.61659
Chr1	7079780	7080125	AT1G20410_2	2,75,71,	0,112,274,	1.90967	5.61659
Chr1	7083260	7083411	AT1G20430_1	151,	0,	2.98858	11.2322
Chr1	7084704	7084804	AT1G20440_1	100,	0,	1.92839	112.642
Chr1	7085000	7085343	AT1G20440_2	180,18,	0,325,	3.96653	112.642
Chr1	7088295	7088770	AT1G20450_1	392,3,	0,472,	5.11106	79.0842
Chr1	7103460	7103708	AT1G20510_1	248,	0,	5.28215	13.2013
Chr1	7105279	7105775	AT1G20510_2	496,	0,	1.92456	13.2013
Chr1	7115166	7115362	AT1G20540_1	196,	0,	9.68027	8.38062
Chr1	7119768	7119917	AT1G20560_1	149,	0,	7.4591	10.181
Chr1	7126843	7127037	AT1G20575_1	194,	0,	6.18816	8.88729
Chr1	7128567	7128714	AT1G20575_2	147,	0,	1.72881	8.88729
Chr1	7130139	7130553	AT1G20580_1	2,245,	0,169,	3.48146	42.4724
Chr1	7136352	7136533	AT1G20610_2	46,53,	0,128,	2.05367	4.31894
Chr1	7149586	7149735	AT1G20630_1	149,	0,	8.31933	32.5153
Chr1	7164378	7164477	AT1G20670_1	99,	0,	6.37898	5.37215
Chr1	7167842	7167992	AT1G20670_2	150,	0,	10.0534	5.37215
Chr1	7179521	7179621	AT1G20696_1	100,	0,	1.94622	92.579
Chr1	7181042	7181425	AT1G20696_2	31,269,	0,114,	2.89239	92.579
Chr1	7212707	7213095	AT1G20760_1	35,66,	0,322,	1.61645	12.884
Chr1	7213445	7213644	AT1G20760_2	42,59,	0,140,	1.42062	12.884
Chr1	7214742	7214943	AT1G20760_3	201,	0,	4.46594	12.884
Chr1	7215058	7215253	AT1G20770_1	195,	0,	6.79949	14.2589
Chr1	7216507	7216654	AT1G20770_2	147,	0,	2.24568	14.2589
Chr1	7220344	7220444	AT1G20780_1	100,	0,	3.18073	9.92522
Chr1	7220543	7220743	AT1G20780_2	200,	0,	4.83558	9.92522
Chr1	7233367	7233513	AT1G20810_1	146,	0,	7.80629	45.1953
Chr1	7234756	7235081	AT1G20816_1	13,224,	0,101,	6.38552	8.50114
Chr1	7244627	7244878	AT1G20830_1	251,	0,	7.90614	10.1079
Chr1	7276991	7277190	AT1G20910_1	199,	0,	8.80285	6.6979
Chr1	7285388	7286329	AT1G20920_1	941,	0,	15.2535	10.7901
Chr1	7289645	7289745	AT1G20920_2	100,	0,	8.59554	10.7901
Chr1	7297337	7297535	AT1G20950_1	198,	0,	5.00081	21.0819
Chr1	7301748	7301998	AT1G20960_1	250,	0,	8.37435	22.254
Chr1	7302773	7302874	AT1G20960_2	101,	0,	1.75979	22.254
Chr1	7308569	7308969	AT1G20960_3	400,	0,	3.72215	22.254
Chr1	7309068	7309368	AT1G20960_4	300,	0,	4.29233	22.254
Chr1	7309616	7309767	AT1G20960_5	151,	0,	1.53286	22.254
Chr1	7317404	7317822	AT1G20970_1	37,163,	0,255,	3.24013	8.9677
Chr1	7318343	7319027	AT1G20970_2	406,141,	0,543,	8.25504	8.9677
Chr1	7319225	7319474	AT1G20970_3	249,	0,	5.69218	8.9677
Chr1	7325217	7325368	AT1G20980_1	151,	0,	2.07167	19.3826
Chr1	7328892	7329142	AT1G20980_2	250,	0,	5.26304	19.3826
Chr1	7373964	7374114	AT1G21060_1	150,	0,	5.48468	4.21858
Chr1	7375590	7375739	AT1G21065_1	149,	0,	4.45842	82.366
Chr1	7376067	7376317	AT1G21070_1	250,	0,	3.05593	5.19826
Chr1	7385184	7385803	AT1G21090_1	30,166,	0,453,	2.09286	3.32014
Chr1	7408030	7408515	AT1G21160_1	156,117,27,	0,261,458,	2.64956	2.60573
Chr1	7411577	7411976	AT1G21160_2	399,	0,	9.37029	2.60573
Chr1	7412075	7412176	AT1G21160_3	101,	0,	2.9748	2.60573
Chr1	7413226	7413854	AT1G21170_1	243,57,	0,571,	4.34068	4.0757
Chr1	7419807	7419952	AT1G21190_1	145,	0,	5.621	18.2417
Chr1	7422633	7422783	AT1G21200_1	150,	0,	5.21303	2.75448
Chr1	7439417	7439567	AT1G21250_1	150,	0,	3.74288	58.172
Chr1	7447088	7447288	AT1G21270_1	200,	0,	2.95644	34.8162
Chr1	7453536	7454231	AT1G21310_1	31,553,	0,142,	3.87723	28.5509
Chr1	7454376	7454863	AT1G21310_2	487,	0,	4.20614	28.5509
Chr1	7476999	7477528	AT1G21350_1	127,87,31,	0,332,498,	2.21189	24.981
Chr1	7485734	7485981	AT1G21380_1	247,	0,	2.73194	17.7114
Chr1	7489962	7490260	AT1G21390_1	298,	0,	3.02235	2.0554
Chr1	7519044	7519144	AT1G21480_1	100,	0,	5.86514	5.49374
Chr1	7529947	7530192	AT1G21500_1	245,	0,	1.72019	236.665
Chr1	7534687	7534784	AT1G21520_1	97,	0,	3.93853	8.24938
Chr1	7548845	7549094	AT1G21540_1	249,	0,	1.94103	2.97107
Chr1	7556765	7557013	AT1G21560_1	248,	0,	7.06655	6.4573
Chr1	7557238	7557736	AT1G21580_1	498,	0,	5.33785	4.48817
Chr1	7558083	7558183	AT1G21580_2	100,	0,	1.36008	4.48817
Chr1	7565317	7565616	AT1G21580_3	299,	0,	2.39891	4.48817
Chr1	7566376	7566624	AT1G21590_1	248,	0,	2.7788	13.5223
Chr1	7569668	7569817	AT1G21590_2	149,	0,	1.45487	13.5223
Chr1	7571188	7572229	AT1G21600_1	442,90,108,	0,553,933,	4.4152	86.7424
Chr1	7573502	7573601	AT1G21600_2	99,	0,	1.23722	86.7424
Chr1	7576233	7576333	AT1G21610_1	100,	0,	1.72223	5.25814
Chr1	7578082	7578317	AT1G21610_2	83,67,	0,168,	2.08463	5.25814
Chr1	7578565	7578864	AT1G21610_3	299,	0,	2.4825	5.25814
Chr1	7592591	7592890	AT1G21640_1	299,	0,	6.39498	14.718
Chr1	7592713	7593012	AT1G21650_1	299,	0,	7.86983	2.84063
Chr1	7615649	7615834	AT1G21690_1	69,30,	0,155,	1.71329	9.61937
Chr1	7620049	7620199	AT1G21700_1	150,	0,	3.21449	6.90358
Chr1	7620346	7620495	AT1G21700_2	149,	0,	2.88885	6.90358
Chr1	7623632	7623968	AT1G21700_3	192,6,	0,330,	3.23616	6.90358
Chr1	7628040	7628190	AT1G21720_1	150,	0,	7.24597	37.8128
Chr1	7648463	7648757	AT1G21750_1	294,	0,	4.42058	59.2016
Chr1	7651434	7651816	AT1G21760_1	30,263,	0,119,	3.66377	6.41235
Chr1	7652176	7652276	AT1G21780_1	100,	0,	2.74935	9.12903
Chr1	7653767	7653965	AT1G21780_2	198,	0,	5.88853	9.12903
Chr1	7655685	7655834	AT1G21790_1	149,	0,	4.9645	4.41667
Chr1	7656959	7657194	AT1G21810_1	5,144,	0,91,	3.92944	1.27757
Chr1	7661623	7662386	AT1G21830_1	161,130,	0,633,	2.70174	4.41449
Chr1	7680633	7680731	AT1G21880_1	98,	0,	1.34461	18.271
Chr1	7680828	7680975	AT1G21880_2	147,	0,	2.07816	18.271
Chr1	7682445	7682592	AT1G21880_3	147,	0,	4.86529	18.271
Chr1	7690950	7691250	AT1G21900_1	300,	0,	4.71481	18.6311
Chr1	7696620	7696717	AT1G21910_1	97,	0,	6.00969	2.28798
Chr1	7714217	7714411	AT1G21930_1	194,	0,	8.01505	12.361
Chr1	7735401	7735946	AT1G21980_1	545,	0,	2.94417	6.38455
Chr1	7738376	7738624	AT1G21980_2	248,	0,	4.13041	6.38455
Chr1	7757140	7757338	AT1G22020_1	198,	0,	5.45656	6.15183
Chr1	7759372	7759669	AT1G22030_1	297,	0,	6.5259	3.46304
Chr1	7759963	7760140	AT1G22030_2	24,76,	0,101,	2.65746	3.46304
Chr1	7791839	7792089	AT1G22070_1	250,	0,	4.46265	17.2758
Chr1	7814757	7815044	AT1G22140_1	287,	0,	4.76214	10.0477
Chr1	7823683	7823875	AT1G22160_1	192,	0,	2.53959	3.6177
Chr1	7828475	7828575	AT1G22180_1	100,	0,	3.15436	3.03911
Chr1	7837659	7837855	AT1G22200_1	196,	0,	14.8651	15.3655
Chr1	7875228	7875773	AT1G22280_1	27,415,	0,130,	3.23837	18.5618
Chr1	7878905	7879274	AT1G22300_1	246,50,	0,319,	5.67347	82.7655
Chr1	7880502	7881150	AT1G22300_2	182,114,	0,534,	3.57729	82.7655
Chr1	7881649	7881749	AT1G22310_1	100,	0,	4.20052	3.61291
Chr1	7881846	7881945	AT1G22310_2	99,	0,	1.60271	3.61291
Chr1	7882644	7882743	AT1G22310_3	99,	0,	1.80266	3.61291
Chr1	7882890	7883038	AT1G22310_4	148,	0,	1.81893	3.61291
Chr1	7888377	7889286	AT1G22330_1	246,152,	0,757,	3.10408	12.9655
Chr1	7895104	7895304	AT1G22360_1	200,	0,	4.71599	20.3635
Chr1	7898161	7898310	AT1G22370_1	149,	0,	3.96972	3.83329
Chr1	7903906	7904104	AT1G22400_1	198,	0,	6.07962	3.79427
Chr1	7914707	7914856	AT1G22410_1	149,	0,	5.09679	51.465
Chr1	7921598	7921795	AT1G22430_1	197,	0,	5.00216	21.4181
Chr1	7926901	7927050	AT1G22450_1	149,	0,	5.57006	44.6501
Chr1	7950866	7951064	AT1G22510_1	198,	0,	8.48051	3.29854
Chr1	7953117	7953261	AT1G22520_1	144,	0,	5.73375	14.2434
Chr1	7955642	7955791	AT1G22530_1	149,	0,	2.19099	57.1009
Chr1	7957378	7957675	AT1G22530_2	297,	0,	3.37102	57.1009
Chr1	7957773	7958070	AT1G22530_3	297,	0,	5.05661	57.1009
Chr1	7966188	7966436	AT1G22540_1	248,	0,	3.77678	4.99612
Chr1	7983785	7984234	AT1G22590_1	449,	0,	2.44379	9.51742
Chr1	7995010	7995111	AT1G22620_1	101,	0,	1.32242	3.90471
Chr1	7997596	7997995	AT1G22620_2	399,	0,	6.10285	3.90471
Chr1	8003953	8004206	AT1G22630_1	20,127,	0,126,	1.87136	55.4737
Chr1	8021433	8021682	AT1G22660_1	249,	0,	8.10938	3.57204
Chr1	8050494	8050688	AT1G22740_1	194,	0,	7.31917	22.6587
Chr1	8052632	8052881	AT1G22750_1	249,	0,	3.81933	21.5933
Chr1	8067245	8067642	AT1G22770_1	397,	0,	4.99601	29.1708
Chr1	8069161	8069259	AT1G22780_1	98,	0,	4.46412	143.357
Chr1	8070828	8071495	AT1G22790_1	23,273,	0,394,	3.47333	8.68156
Chr1	8080280	8080476	AT1G22840_1	196,	0,	8.94592	91.8207
Chr1	8080578	8080921	AT1G22850_1	140,7,	0,336,	2.30614	61.2866
Chr1	8082590	8082833	AT1G22850_2	243,	0,	2.11934	61.2866
Chr1	8095646	8095746	AT1G22880_1	100,	0,	3.2541	2.3264
Chr1	8099594	8099890	AT1G22882_1	296,	0,	3.2721	11.536
Chr1	8100528	8100677	AT1G22882_2	149,	0,	3.4396	11.536
Chr1	8100873	8101070	AT1G22882_3	197,	0,	8.8397	11.536
Chr1	8101168	8101267	AT1G22882_4	99,	0,	1.63066	11.536
Chr1	8103118	8103306	AT1G22890_1	188,	0,	1.78097	5.67399
Chr1	8104306	8104456	AT1G22900_1	150,	0,	2.03354	3.39284
Chr1	8109772	8109873	AT1G22920_1	101,	0,	7.01227	15.2146
Chr1	8118128	8118328	AT1G22930_1	200,	0,	1.61426	9.95609
Chr1	8121454	8121803	AT1G22930_2	349,	0,	6.73477	9.95609
Chr1	8121902	8122052	AT1G22930_3	150,	0,	4.44801	9.95609
Chr1	8124821	8124970	AT1G22940_1	149,	0,	2.2924	11.4838
Chr1	8125071	8125319	AT1G22950_1	248,	0,	5.20804	7.68615
Chr1	8127038	8127187	AT1G22950_2	149,	0,	2.0615	7.68615
Chr1	8130744	8130991	AT1G22970_1	247,	0,	1.73913	5.68908
Chr1	8144238	8144436	AT1G23000_1	198,	0,	2.38536	2.57333
Chr1	8188835	8188985	AT1G23090_1	150,	0,	1.52503	14.6518
Chr1	8213046	8213145	AT1G23170_1	99,	0,	1.60078	4.73893
Chr1	8219443	8219542	AT1G23180_1	99,	0,	3.46182	12.9251
Chr1	8224155	8224400	AT1G23190_1	245,	0,	8.59708	37.2292
Chr1	8234582	8234777	AT1G23205_1	195,	0,	2.9636	16.1144
Chr1	8244117	8244308	AT1G23220_1	191,	0,	7.28296	11.4674
Chr1	8251589	8251887	AT1G23230_1	298,	0,	8.14408	6.06512
Chr1	8257100	8257484	AT1G23260_1	164,34,	0,350,	3.75399	15.9942
Chr1	8260802	8261761	AT1G23280_1	116,122,118,141,87,	0,211,432,642,872,	2.97549	24.7388
Chr1	8279753	8279953	AT1G23330_1	200,	0,	5.51078	2.7564
Chr1	8295225	8295422	AT1G23360_1	197,	0,	8.18078	11.7184
Chr1	8312083	8312333	AT1G23400_1	250,	0,	4.94359	16.0133
Chr1	8314078	8314229	AT1G23400_2	151,	0,	1.8329	16.0133
Chr1	8314527	8314678	AT1G23400_3	151,	0,	2.52358	16.0133
Chr1	8324000	8324199	AT1G23440_1	199,	0,	5.38168	5.29366
Chr1	8336166	8336266	AT1G23480_1	100,	0,	2.40992	8.76159
Chr1	8338385	8338582	AT1G23490_1	197,	0,	4.17294	139.634
Chr1	8346138	8346337	AT1G23530_1	199,	0,	1.85089	3.22047
Chr1	8401263	8401407	AT1G23750_1	144,	0,	8.82264	7.29083
Chr1	8406859	8407105	AT1G23780_1	246,	0,	3.13253	11.2789
Chr1	8411733	8411833	AT1G23790_1	100,	0,	1.68188	2.75654
Chr1	8422740	8422936	AT1G23820_1	196,	0,	7.51123	77.103
Chr1	8427794	8428089	AT1G23860_2	295,	0,	7.59378	7.96157
Chr1	8435038	8435309	AT1G23870_1	4,145,	0,126,	1.43125	3.33804
Chr1	8447083	8447482	AT1G23900_1	399,	0,	7.17355	8.95116
Chr1	8469629	8469776	AT1G23950_1	147,	0,	5.00083	14.5043
Chr1	8478490	8478740	AT1G23960_1	250,	0,	3.92461	15.6592
Chr1	8482045	8482243	AT1G23970_1	198,	0,	5.08622	5.32776
Chr1	8508566	8508811	AT1G24050_1	245,	0,	14.0207	29.2046
Chr1	8525530	8525826	AT1G24100_1	296,	0,	6.55276	44.8331
Chr1	8526791	8527038	AT1G24100_2	247,	0,	2.05463	44.8331
Chr1	8529262	8529563	AT1G24120_1	301,	0,	4.93176	24.777
Chr1	8549340	8549690	AT1G24150_1	350,	0,	2.37048	5.69607
Chr1	8550038	8550139	AT1G24150_2	101,	0,	1.59271	5.69607
Chr1	8550237	8550388	AT1G24150_3	151,	0,	1.93924	5.69607
Chr1	8551536	8551687	AT1G24150_4	151,	0,	3.40096	5.69607
Chr1	8551885	8552036	AT1G24150_5	151,	0,	2.45993	5.69607
Chr1	8553460	8553608	AT1G24160_1	148,	0,	3.70136	15.7874
Chr1	8554583	8555180	AT1G24160_2	201,292,	0,305,	4.0459	15.7874
Chr1	8555277	8555426	AT1G24160_3	149,	0,	1.40753	15.7874
Chr1	8557750	8557848	AT1G24170_1	98,	0,	1.14594	39.1489
Chr1	8560614	8561262	AT1G24180_1	207,66,54,15,	0,324,472,633,	2.91372	26.8974
Chr1	8565418	8565618	AT1G24190_2	200,	0,	1.89079	5.03515
Chr1	8565716	8566108	AT1G24190_3	111,40,	0,352,	1.60004	5.03515
Chr1	8567962	8568062	AT1G24190_4	100,	0,	1.6195	5.03515
Chr1	8568817	8568967	AT1G24190_5	150,	0,	2.94569	5.03515
Chr1	8604168	8604463	AT1G24267_1	295,	0,	5.51044	14.8908
Chr1	8612383	8612531	AT1G24280_1	148,	0,	7.7073	5.32496
Chr1	8613837	8614085	AT1G24290_1	248,	0,	1.67399	2.75236
Chr1	8614412	8614897	AT1G24300_1	359,38,	0,447,	3.66889	6.83967
Chr1	8620415	8620565	AT1G24300_2	150,	0,	3.19709	6.83967
Chr1	8624162	8624559	AT1G24310_1	397,	0,	1.92185	9.08745
Chr1	8626107	8626405	AT1G24310_2	298,	0,	7.30341	9.08745
Chr1	8638390	8638490	AT1G24340_1	100,	0,	1.51036	2.8352
Chr1	8638638	8638986	AT1G24340_2	348,	0,	5.0476	2.8352
Chr1	8638665	8638811	AT1G24350_1	146,	0,	2.18133	3.39065
Chr1	8638907	8639102	AT1G24350_2	195,	0,	4.65108	3.39065
Chr1	8643258	8643405	AT1G24360_1	147,	0,	11.4302	67.2439
Chr1	8663714	8663910	AT1G24440_1	196,	0,	3.3699	3.56223
Chr1	8665080	8665227	AT1G24450_1	147,	0,	4.07135	6.51111
Chr1	8667113	8667314	AT1G24460_1	201,	0,	1.98874	4.77583
Chr1	8668809	8668959	AT1G24460_2	150,	0,	1.54801	4.77583
Chr1	8671503	8671604	AT1G24460_3	101,	0,	1.79287	4.77583
Chr1	8671965	8672601	AT1G24460_4	2,82,366,	0,98,270,	3.4433	4.77583
Chr1	8682293	8682491	AT1G24490_1	198,	0,	2.53945	13.1286
Chr1	8684550	8684827	AT1G24490_2	33,165,	0,112,	2.84098	13.1286
Chr1	8684925	8685271	AT1G24490_3	346,	0,	7.64188	13.1286
Chr1	8693172	8693519	AT1G24530_1	347,	0,	1.77882	9.85709
Chr1	8703344	8703492	AT1G24560_1	148,	0,	3.59118	8.90845
Chr1	8704680	8705485	AT1G24560_2	32,117,196,	0,160,609,	3.84473	8.90845
Chr1	8705583	8705830	AT1G24560_3	247,	0,	4.96236	8.90845
Chr1	8711333	8711481	AT1G24575_1	148,	0,	1.57237	13.9555
Chr1	8720750	8720951	AT1G24610_1	201,	0,	4.90367	17.545
Chr1	8754020	8754220	AT1G24706_1	200,	0,	1.85131	5.28633
Chr1	8754319	8754808	AT1G24706_2	156,93,	0,396,	5.81526	5.28633
Chr1	8754956	8755057	AT1G24706_3	101,	0,	3.59303	5.28633
Chr1	8755205	8755554	AT1G24706_4	349,	0,	19.0527	5.28633
Chr1	8759630	8759976	AT1G24764_1	346,	0,	6.38638	11.3123
Chr1	8760191	8760339	AT1G24764_2	148,	0,	2.76798	11.3123
Chr1	8837283	8837483	AT1G25220_1	200,	0,	4.45498	11.8266
Chr1	8850954	8851643	AT1G25250_2	689,	0,	6.35086	3.77376
Chr1	8854031	8854181	AT1G25260_1	150,	0,	7.57793	26.455
Chr1	8865946	8866196	AT1G25280_1	250,	0,	1.77952	11.0116
Chr1	8866594	8866745	AT1G25280_2	151,	0,	2.96774	11.0116
Chr1	8868947	8869046	AT1G25290_1	99,	0,	5.38026	7.14511
Chr1	8889167	8889317	AT1G25350_1	150,	0,	5.76395	15.3696
Chr1	8892599	8892921	AT1G25350_2	27,108,16,	0,109,306,	1.97083	15.3696
Chr1	8905654	8905955	AT1G25380_1	301,	0,	5.24101	7.65609
Chr1	8911428	8911629	AT1G25400_1	201,	0,	2.37925	1.93268
Chr1	8917969	8918168	AT1G25420_1	199,	0,	9.46368	8.67253
Chr1	8934013	8934552	AT1G25440_1	180,267,	0,272,	2.41979	140.058
Chr1	8939928	8940320	AT1G25450_1	392,	0,	1.62134	16.141
Chr1	8950384	8950534	AT1G25480_1	150,	0,	1.75665	3.08243
Chr1	8954865	8955013	AT1G25490_1	148,	0,	2.3699	35.0168
Chr1	8960683	8960784	AT1G25510_1	101,	0,	2.5739	2.98186
Chr1	8964319	8964466	AT1G25520_1	147,	0,	11.5248	9.67954
Chr1	8969212	8969460	AT1G25540_1	248,	0,	6.73077	4.69878
Chr1	8969607	8969756	AT1G25540_2	149,	0,	4.13209	4.69878
Chr1	8992057	8992208	AT1G25570_1	151,	0,	2.33761	9.11588
Chr1	8995238	8995467	AT1G25570_2	35,116,	0,113,	2.6359	9.11588
Chr1	8997440	8997540	AT1G25580_2	100,	0,	2.07774	4.39328
Chr1	8998294	8998393	AT1G25580_3	99,	0,	1.54799	4.39328
Chr1	9002383	9002682	AT1G25682_1	299,	0,	4.55056	9.47476
Chr1	9022568	9022719	AT1G26090_1	151,	0,	5.31345	8.91671
Chr1	9022590	9022738	AT1G26100_1	148,	0,	6.26224	4.942
Chr1	9024390	9024787	AT1G26110_1	397,	0,	4.16266	44.9499
Chr1	9025253	9025481	AT1G26110_2	58,42,	0,186,	1.75899	44.9499
Chr1	9026340	9026540	AT1G26110_3	200,	0,	1.12242	44.9499
Chr1	9028425	9028625	AT1G26120_1	200,	0,	11.9634	4.99352
Chr1	9039677	9039927	AT1G26150_1	250,	0,	7.35383	13.0939
Chr1	9041962	9042411	AT1G26150_2	449,	0,	4.75012	13.0939
Chr1	9042509	9042759	AT1G26150_3	250,	0,	4.23747	13.0939
Chr1	9044567	9044811	AT1G26160_1	244,	0,	4.12344	13.0158
Chr1	9047390	9047671	AT1G26170_1	199,1,	0,280,	6.35079	5.60818
Chr1	9056644	9056793	AT1G26180_1	149,	0,	5.29632	10.7942
Chr1	9057144	9057345	AT1G26190_1	201,	0,	4.31779	5.16139
Chr1	9067379	9068012	AT1G26210_1	46,491,	0,142,	1.88101	21.6321
Chr1	9072304	9072551	AT1G26230_1	247,	0,	4.73041	11.7661
Chr1	9087685	9087907	AT1G26260_1	77,72,	0,150,	3.17636	1.99185
Chr1	9089715	9089814	AT1G26270_1	99,	0,	1.52275	13.9472
Chr1	9089912	9090357	AT1G26270_2	445,	0,	2.90228	13.9472
Chr1	9095816	9096555	AT1G26300_1	272,50,125,	0,359,614,	3.10237	2.40987
Chr1	9114739	9114835	AT1G26340_1	96,	0,	4.43331	10.0231
Chr1	9121541	9121741	AT1G26370_1	200,	0,	7.49327	5.63452
Chr1	9144034	9144183	AT1G26440_1	149,	0,	1.90002	4.28313
Chr1	9151776	9152075	AT1G26460_1	299,	0,	4.36839	14.0044
Chr1	9154314	9154712	AT1G26460_2	398,	0,	7.05102	14.0044
Chr1	9163259	9163587	AT1G26520_1	244,2,	0,326,	2.98863	3.07749
Chr1	9165181	9165329	AT1G26520_2	148,	0,	2.24179	3.07749
Chr1	9172735	9172885	AT1G26550_1	150,	0,	13.1475	80.0284
Chr1	9181620	9181720	AT1G26560_1	100,	0,	3.23574	6.26708
Chr1	9186392	9186492	AT1G26580_1	100,	0,	1.9909	15.5728
Chr1	9186787	9186986	AT1G26580_2	199,	0,	1.86575	15.5728
Chr1	9187182	9187430	AT1G26580_3	248,	0,	4.20155	15.5728
Chr1	9195659	9196054	AT1G26620_1	395,	0,	2.16779	3.19746
Chr1	9207070	9207269	AT1G26630_1	199,	0,	2.82918	415.481
Chr1	9207480	9207827	AT1G26640_1	235,11,	0,336,	5.64793	8.53246
Chr1	9209754	9209853	AT1G26640_2	99,	0,	5.30683	8.53246
Chr1	9217717	9217913	AT1G26670_1	196,	0,	5.00673	21.1081
Chr1	9245074	9245263	AT1G26740_1	189,	0,	12.7253	14.847
Chr1	9250285	9250678	AT1G26761_1	393,	0,	3.28125	12.3807
Chr1	9285611	9285808	AT1G26800_1	197,	0,	2.63423	3.0869
Chr1	9298082	9298480	AT1G26830_1	398,	0,	3.8303	15.6096
Chr1	9300188	9300656	AT1G26840_1	15,97,130,	0,140,338,	1.95339	3.45386
Chr1	9301004	9301104	AT1G26850_1	100,	0,	7.22786	65.6057
Chr1	9315403	9315653	AT1G26880_1	250,	0,	6.46344	58.8614
Chr1	9322728	9322928	AT1G26910_1	200,	0,	3.10384	8.8546
Chr1	9344795	9345176	AT1G26940_1	59,235,	0,146,	7.64953	8.24378
Chr1	9356399	9356499	AT1G26960_1	100,	0,	2.10655	3.01898
Chr1	9376439	9376634	AT1G27000_1	195,	0,	14.2479	27.3263
Chr1	9380395	9380593	AT1G27020_1	198,	0,	3.73832	7.56733
Chr1	9396525	9396673	AT1G27060_1	148,	0,	4.94196	2.95934
Chr1	9396706	9396903	AT1G27070_1	197,	0,	9.44433	3.3582
Chr1	9403949	9404525	AT1G27090_1	448,45,	0,531,	1.75586	66.911
Chr1	9405876	9406172	AT1G27090_2	296,	0,	1.54164	66.911
Chr1	9407282	9407530	AT1G27100_1	248,	0,	2.30989	18.3539
Chr1	9422147	9422495	AT1G27120_1	97,152,	0,196,	4.36998	3.70716
Chr1	9431253	9431510	AT1G27150_1	18,52,29,	0,93,228,	1.68346	5.3878
Chr1	9431830	9432212	AT1G27150_2	65,231,	0,151,	8.27131	5.3878
Chr1	9482647	9482845	AT1G27290_1	198,	0,	3.2493	17.6932
Chr1	9483305	9483455	AT1G27300_1	150,	0,	2.14007	5.84498
Chr1	9483821	9483921	AT1G27300_2	100,	0,	2.34659	5.84498
Chr1	9484364	9484609	AT1G27310_1	245,	0,	8.10566	48.0426
Chr1	9491605	9491893	AT1G27320_1	68,131,	0,157,	2.31328	13.1091
Chr1	9492041	9492533	AT1G27320_2	60,338,	0,154,	5.87714	13.1091
Chr1	9492943	9493543	AT1G27330_1	123,21,	0,579,	1.65951	21.9627
Chr1	9493905	9494049	AT1G27330_2	144,	0,	2.80061	21.9627
Chr1	9497886	9498036	AT1G27340_1	150,	0,	3.49726	16.4592
Chr1	9498142	9498335	AT1G27350_1	193,	0,	3.11877	17.6082
Chr1	9503624	9503824	AT1G27360_1	200,	0,	4.66325	2.74847
Chr1	9513177	9513833	AT1G27390_1	423,62,	0,594,	4.38708	19.6795
Chr1	9516525	9516773	AT1G27400_1	54,96,	0,152,	5.00973	97.4722
Chr1	9520924	9521407	AT1G27430_1	380,19,	0,464,	3.6906	6.80092
Chr1	9527080	9527180	AT1G27430_2	100,	0,	2.50103	6.80092
Chr1	9527643	9527978	AT1G27435_1	335,	0,	3.32059	20.31
Chr1	9533654	9534043	AT1G27450_1	3,293,	0,96,	4.50453	84.1365
Chr1	9537315	9537515	AT1G27460_1	200,	0,	5.19818	12.4272
Chr1	9540148	9540298	AT1G27470_1	150,	0,	2.63197	7.72983
Chr1	9540446	9540596	AT1G27470_2	150,	0,	1.662	7.72983
Chr1	9545942	9546187	AT1G27480_1	245,	0,	3.41482	32.2498
Chr1	9554807	9555005	AT1G27510_1	198,	0,	10.8361	16.6952
Chr1	9556438	9556537	AT1G27510_2	99,	0,	1.36567	16.6952
Chr1	9556634	9556733	AT1G27510_3	99,	0,	1.45104	16.6952
Chr1	9558165	9558264	AT1G27510_4	99,	0,	1.39343	16.6952
Chr1	9562042	9562289	AT1G27520_1	247,	0,	13.5159	3.93309
Chr1	9562635	9562784	AT1G27530_1	149,	0,	10.0243	26.1218
Chr1	9589855	9590051	AT1G27580_1	196,	0,	5.87056	19.887
Chr1	9597547	9597904	AT1G27595_1	157,42,	0,315,	3.29229	4.5744
Chr1	9603580	9603777	AT1G27600_1	197,	0,	5.09898	12.5039
Chr1	9614088	9614237	AT1G27630_1	149,	0,	8.9849	12.8668
Chr1	9615738	9616279	AT1G27650_1	541,	0,	4.08443	22.8662
Chr1	9625624	9625723	AT1G27660_1	99,	0,	1.84458	2.27608
Chr1	9634222	9634547	AT1G27680_1	51,199,	0,126,	3.3946	12.9686
Chr1	9638254	9638454	AT1G27690_1	200,	0,	4.30416	4.8566
Chr1	9639956	9640105	AT1G27695_1	149,	0,	7.40997	3.67171
Chr1	9639907	9640401	AT1G27700_1	494,	0,	5.55235	6.14151
Chr1	9660713	9660962	AT1G27750_1	249,	0,	2.39201	4.32947
Chr1	9666903	9667451	AT1G27752_1	548,	0,	6.28361	7.74746
Chr1	9668656	9668807	AT1G27760_1	151,	0,	2.1856	14.8049
Chr1	9671681	9671830	AT1G27770_1	149,	0,	5.25499	15.3521
Chr1	9693105	9693667	AT1G27840_1	271,72,3,	0,378,559,	6.57201	5.77635
Chr1	9703447	9703894	AT1G27850_1	447,	0,	4.16846	5.98113
Chr1	9715538	9715736	AT1G27900_1	198,	0,	9.50862	5.60285
Chr1	9720831	9720980	AT1G27910_1	149,	0,	5.59597	4.26635
Chr1	9746805	9746999	AT1G27970_1	194,	0,	1.59456	32.3976
Chr1	9747774	9748017	AT1G27970_2	243,	0,	2.90305	32.3976
Chr1	9752519	9752719	AT1G27980_1	200,	0,	5.62957	4.65631
Chr1	9779267	9779615	AT1G28060_1	348,	0,	7.21329	9.28329
Chr1	9780744	9781617	AT1G28060_2	40,155,5,	0,137,868,	1.91351	9.28329
Chr1	9781715	9781964	AT1G28060_3	249,	0,	1.87269	9.28329
Chr1	9782062	9782659	AT1G28060_4	597,	0,	7.36078	9.28329
Chr1	9798482	9799017	AT1G28090_1	121,324,	0,211,	6.32654	6.32565
Chr1	9803810	9804245	AT1G28100_1	282,115,	0,320,	3.48603	3.11265
Chr1	9803935	9804181	AT1G28110_1	246,	0,	4.60551	6.94523
Chr1	9813027	9813356	AT1G28120_1	215,32,	0,297,	6.36225	12.7718
Chr1	9832810	9833056	AT1G28140_1	246,	0,	5.68319	46.4583
Chr1	9834934	9835227	AT1G28150_1	293,	0,	2.57789	15.9538
Chr1	9850287	9850436	AT1G28200_1	149,	0,	4.40581	9.45999
Chr1	9852103	9852301	AT1G28200_2	198,	0,	2.72133	9.45999
Chr1	9855619	9855888	AT1G28210_1	29,39,32,	0,115,237,	1.57675	2.25096
Chr1	9875340	9875531	AT1G28250_1	191,	0,	8.34173	9.77265
Chr1	9886487	9886686	AT1G28280_2	199,	0,	1.59714	10.3757
Chr1	9886982	9887330	AT1G28280_3	348,	0,	2.16491	10.3757
Chr1	9890224	9890324	AT1G28290_1	100,	0,	4.11298	70.7659
Chr1	9890422	9890719	AT1G28290_2	297,	0,	3.89767	70.7659
Chr1	9913093	9913193	AT1G28310_1	100,	0,	1.72552	4.81531
Chr1	9913341	9913490	AT1G28310_2	149,	0,	1.48229	4.81531
Chr1	9920515	9920714	AT1G28320_1	199,	0,	4.54616	8.31628
Chr1	9943369	9943518	AT1G28340_1	149,	0,	13.7117	10.5055
Chr1	9946987	9947527	AT1G28350_1	78,121,	0,419,	1.9216	8.30691
Chr1	9949586	9949785	AT1G28350_2	199,	0,	12.0796	8.30691
Chr1	9963647	9963797	AT1G28380_1	150,	0,	2.23413	12.7456
Chr1	9966069	9966170	AT1G28380_2	101,	0,	3.80084	12.7456
Chr1	9967016	9967264	AT1G28390_1	248,	0,	3.93417	1.91512
Chr1	9969395	9969695	AT1G28395_1	300,	0,	6.89242	9.80486
Chr1	9970119	9971482	AT1G28395_2	34,116,201,	0,953,1162,	1.99104	9.80486
Chr1	9973014	9973698	AT1G28400_1	684,	0,	3.28202	15.1742
Chr1	9976279	9976573	AT1G28410_1	294,	0,	7.94647	3.84418
Chr1	9981524	9982254	AT1G28420_1	13,90,165,130,	0,105,309,600,	6.3858	6.02138
Chr1	9986744	9987638	AT1G28420_2	894,	0,	3.95577	6.02138
Chr1	10017110	10017999	AT1G28490_1	156,91,66,268,	0,301,477,621,	3.85782	9.66419
Chr1	10025193	10025878	AT1G28510_1	41,104,	0,581,	1.89362	16.7164
Chr1	10026021	10026263	AT1G28510_2	242,	0,	9.2487	16.7164
Chr1	10031253	10031892	AT1G28520_1	639,	0,	4.48917	8.04639
Chr1	10032033	10032382	AT1G28530_1	212,37,	0,312,	9.54325	4.66213
Chr1	10036755	10036955	AT1G28540_1	200,	0,	13.4043	2.89217
Chr1	10044484	10044682	AT1G28580_1	198,	0,	4.15201	10.4576
Chr1	10053637	10053980	AT1G28610_1	343,	0,	4.99596	28.0556
Chr1	10074555	10074703	AT1G28670_1	148,	0,	2.54241	2.98423
Chr1	10075027	10075126	AT1G28670_2	99,	0,	1.53141	2.98423
Chr1	10078287	10078485	AT1G28680_1	198,	0,	3.92833	8.9622
Chr1	10079760	10079860	AT1G28680_2	100,	0,	1.80767	8.9622
Chr1	10086709	10086955	AT1G28710_1	246,	0,	4.46204	2.69807
Chr1	10087623	10087771	AT1G28710_2	148,	0,	1.76761	2.69807
Chr1	10109998	10110199	AT1G28960_1	201,	0,	1.86961	5.3846
Chr1	10129098	10129348	AT1G29030_1	250,	0,	5.94168	4.39303
Chr1	10135142	10135339	AT1G29040_1	197,	0,	6.07655	9.17216
Chr1	10136294	10136442	AT1G29050_1	148,	0,	3.39211	6.74784
Chr1	10149388	10149633	AT1G29060_1	245,	0,	6.97277	4.83427
Chr1	10151117	10151311	AT1G29070_1	194,	0,	3.09802	297.536
Chr1	10178125	10178373	AT1G29120_1	248,	0,	4.24026	10.4729
Chr1	10182512	10182611	AT1G29150_1	99,	0,	8.14348	34.6417
Chr1	10184170	10184317	AT1G29160_1	147,	0,	3.27137	3.75742
Chr1	10190186	10190613	AT1G29170_1	216,84,	0,343,	3.50257	2.83062
Chr1	10192481	10192682	AT1G29170_2	201,	0,	3.00246	2.83062
Chr1	10210567	10210713	AT1G29220_1	146,	0,	6.11528	8.60691
Chr1	10211803	10212191	AT1G29220_2	4,36,58,	0,100,330,	2.38053	8.60691
Chr1	10212287	10212529	AT1G29220_3	242,	0,	4.766	8.60691
Chr1	10216828	10216978	AT1G29240_1	150,	0,	6.35986	5.15464
Chr1	10217214	10217315	AT1G29240_2	101,	0,	1.4198	5.15464
Chr1	10219642	10219793	AT1G29240_3	151,	0,	1.84792	5.15464
Chr1	10223315	10223514	AT1G29250_1	199,	0,	4.32887	41.0923
Chr1	10225883	10226030	AT1G29260_1	147,	0,	6.53022	10.1115
Chr1	10254443	10254643	AT1G29310_1	200,	0,	7.77308	14.9503
Chr1	10257950	10258343	AT1G29320_1	393,	0,	9.75894	7.3555
Chr1	10268520	10269020	AT1G29350_1	500,	0,	6.30193	5.87232
Chr1	10273521	10273671	AT1G29350_2	150,	0,	1.28906	5.87232
Chr1	10277944	10278093	AT1G29370_1	149,	0,	7.89504	5.93375
Chr1	10286361	10286460	AT1G29390_1	99,	0,	7.29506	34.7379
Chr1	10288274	10288372	AT1G29395_1	98,	0,	1.68778	81.1105
Chr1	10303172	10303271	AT1G29430_1	99,	0,	2.29879	4.35605
Chr1	10310280	10310580	AT1G29470_1	300,	0,	1.67552	58.2602
Chr1	10312759	10313159	AT1G29470_2	400,	0,	5.90155	58.2602
Chr1	10324893	10324993	AT1G29530_1	100,	0,	3.01581	16.3006
Chr1	10326241	10326699	AT1G29530_2	25,124,	0,334,	3.19236	16.3006
Chr1	10332126	10332276	AT1G29550_1	150,	0,	6.17518	5.64649
Chr1	10379068	10379414	AT1G29690_1	346,	0,	5.30923	5.44945
Chr1	10385043	10385384	AT1G29700_1	245,5,	0,336,	7.68054	23.5538
Chr1	10386745	10386895	AT1G29700_2	150,	0,	1.81592	23.5538
Chr1	10430157	10430500	AT1G29790_1	343,	0,	3.42538	7.20712
Chr1	10435422	10435617	AT1G29810_1	195,	0,	5.57113	3.25933
Chr1	10440492	10440737	AT1G29820_1	245,	0,	6.70331	5.20671
Chr1	10445767	10445867	AT1G29840_1	100,	0,	6.86377	3.79057
Chr1	10447836	10447935	AT1G29850_1	99,	0,	1.81872	31.6302
Chr1	10448726	10449022	AT1G29850_2	19,62,18,	0,119,278,	1.74937	31.6302
Chr1	10449464	10449871	AT1G29850_3	21,274,	0,133,	4.17701	31.6302
Chr1	10459555	10459755	AT1G29880_1	200,	0,	7.6531	40.4744
Chr1	10460290	10460535	AT1G29880_2	100,50,	0,195,	1.59151	40.4744
Chr1	10462619	10462719	AT1G29880_3	100,	0,	2.7908	40.4744
Chr1	10467052	10467302	AT1G29890_1	250,	0,	7.17479	7.4298
Chr1	10468153	10468401	AT1G29900_1	248,	0,	2.42869	31.8934
Chr1	10471913	10472063	AT1G29900_2	150,	0,	3.35933	31.8934
Chr1	10479204	10479452	AT1G29940_1	248,	0,	4.65246	7.54276
Chr1	10486675	10486775	AT1G29940_2	100,	0,	2.31955	7.54276
Chr1	10498399	10498499	AT1G29970_1	100,	0,	4.93886	5.19018
Chr1	10499159	10499604	AT1G29970_2	85,14,	0,431,	1.55227	5.19018
Chr1	10499702	10499950	AT1G29970_3	248,	0,	6.42425	5.19018
Chr1	10503338	10503439	AT1G29980_1	101,	0,	3.01712	9.13939
Chr1	10505988	10506089	AT1G29980_2	101,	0,	3.89256	9.13939
Chr1	10508819	10509056	AT1G29990_1	237,	0,	4.9872	20.4757
Chr1	10509255	10509555	AT1G30000_1	300,	0,	12.3118	6.95317
Chr1	10538456	10538605	AT1G30040_1	149,	0,	1.60511	3.14437
Chr1	10546708	10547051	AT1G30070_1	187,61,	0,282,	5.90299	7.28826
Chr1	10559944	10560095	AT1G30090_2	151,	0,	1.34131	7.55049
Chr1	10583609	10583758	AT1G30110_1	149,	0,	1.95575	2.72196
Chr1	10587716	10587914	AT1G30130_1	198,	0,	2.12969	5.9289
Chr1	10625099	10625299	AT1G30200_1	200,	0,	2.59389	15.458
Chr1	10626885	10627085	AT1G30200_2	200,	0,	4.28116	15.458
Chr1	10627233	10627380	AT1G30210_1	147,	0,	7.21464	21.7097
Chr1	10628858	10629103	AT1G30210_2	245,	0,	1.38474	21.7097
Chr1	10639958	10640148	AT1G30230_1	90,10,	0,180,	1.17032	169.036
Chr1	10640541	10640692	AT1G30230_2	151,	0,	4.97141	169.036
Chr1	10645800	10645900	AT1G30240_2	100,	0,	3.46192	3.33944
Chr1	10647411	10647602	AT1G30250_1	191,	0,	1.88233	20.5925
Chr1	10658332	10658431	AT1G30270_1	99,	0,	2.44823	4.99606
Chr1	10658529	10658776	AT1G30270_2	247,	0,	9.38438	4.99606
Chr1	10663335	10663782	AT1G30280_1	447,	0,	3.3795	14.6497
Chr1	10682176	10682538	AT1G30320_1	168,81,	0,281,	5.02013	2.56525
Chr1	10737501	10737892	AT1G30400_1	7,293,	0,98,	11.678	15.4863
Chr1	10744327	10744478	AT1G30410_1	151,	0,	1.56514	5.7575
Chr1	10747014	10747214	AT1G30410_2	200,	0,	5.88576	5.7575
Chr1	10747363	10747463	AT1G30410_3	100,	0,	9.8483	5.7575
Chr1	10761836	10762034	AT1G30440_1	198,	0,	3.12593	23.0215
Chr1	10762181	10762330	AT1G30440_2	149,	0,	2.12062	23.0215
Chr1	10769071	10769468	AT1G30450_1	397,	0,	4.75859	7.10662
Chr1	10771357	10771754	AT1G30460_1	397,	0,	4.65117	4.5075
Chr1	10772001	10772200	AT1G30460_2	199,	0,	5.70565	4.5075
Chr1	10786001	10786200	AT1G30470_1	199,	0,	1.42356	15.8843
Chr1	10786398	10786548	AT1G30470_2	150,	0,	5.61568	15.8843
Chr1	10790656	10790999	AT1G30480_1	343,	0,	7.32796	6.01868
Chr1	10796222	10796372	AT1G30490_1	150,	0,	5.09039	7.94819
Chr1	10807126	10807372	AT1G30510_1	246,	0,	1.64595	9.93035
Chr1	10813430	10813630	AT1G30520_1	200,	0,	5.41319	9.6455
Chr1	10816812	10817109	AT1G30540_1	192,5,	0,292,	4.00081	4.51504
Chr1	10831207	10831308	AT1G30570_1	101,	0,	2.03865	7.16043
Chr1	10831772	10831922	AT1G30580_1	150,	0,	10.3937	75.6853
Chr1	10835834	10836034	AT1G30590_1	200,	0,	7.90891	8.10788
Chr1	10847011	10847211	AT1G30610_1	200,	0,	3.51581	7.28419
Chr1	10847509	10847909	AT1G30610_2	400,	0,	2.2523	7.28419
Chr1	10850374	10850624	AT1G30610_3	250,	0,	5.8039	7.28419
Chr1	10854665	10854815	AT1G30620_1	150,	0,	1.80985	4.74196
Chr1	10857931	10858181	AT1G30620_2	250,	0,	7.80099	4.74196
Chr1	10858330	10858580	AT1G30630_1	250,	0,	4.41269	45.9961
Chr1	10886025	10886422	AT1G30680_1	397,	0,	7.5012	14.1075
Chr1	10938002	10938250	AT1G30810_1	248,	0,	4.26892	4.91796
Chr1	10945055	10945400	AT1G30820_1	345,	0,	2.5967	6.08124
Chr1	10962847	10963132	AT1G30825_1	30,169,	0,116,	5.66607	5.75903
Chr1	10986644	10986745	AT1G30860_1	101,	0,	3.8455	2.79391
Chr1	10987230	10987515	AT1G30860_2	190,11,	0,274,	2.46803	2.79391
Chr1	10987613	10987913	AT1G30860_3	300,	0,	2.08605	2.79391
Chr1	10993196	10993491	AT1G30880_1	295,	0,	3.7352	30.2059
Chr1	10995874	10996173	AT1G30890_1	299,	0,	6.42922	10.7288
Chr1	11000463	11000562	AT1G30900_1	99,	0,	4.04347	4.14835
Chr1	11002682	11002930	AT1G30910_1	248,	0,	14.7292	10.5824
Chr1	11040348	11040644	AT1G30970_1	296,	0,	5.31639	8.43738
Chr1	11041737	11041984	AT1G30970_2	247,	0,	1.64059	8.43738
Chr1	11043526	11043724	AT1G30970_3	198,	0,	2.36012	8.43738
Chr1	11054827	11055199	AT1G31010_1	242,51,	0,321,	5.13737	2.97289
Chr1	11058604	11058845	AT1G31020_1	241,	0,	6.03151	4.21827
Chr1	11084915	11085015	AT1G31070_1	100,	0,	3.73917	10.5442
Chr1	11104335	11104632	AT1G31120_1	297,	0,	4.23354	2.63406
Chr1	11115613	11116001	AT1G31130_1	388,	0,	2.87663	17.4244
Chr1	11121408	11121705	AT1G31150_1	297,	0,	2.20095	2.65866
Chr1	11122698	11122890	AT1G31160_1	192,	0,	3.5493	18.8426
Chr1	11134102	11134440	AT1G31170_1	23,228,	0,110,	4.69643	12.1906
Chr1	11142759	11142910	AT1G31180_1	151,	0,	3.01227	40.9202
Chr1	11146731	11146881	AT1G31190_1	150,	0,	6.99683	48.5744
Chr1	11147018	11147260	AT1G31200_1	242,	0,	5.02794	4.54128
Chr1	11158339	11158438	AT1G31220_1	99,	0,	1.90673	6.42481
Chr1	11158535	11158683	AT1G31220_2	148,	0,	15.1775	6.42481
Chr1	11183668	11183817	AT1G31280_1	149,	0,	2.24207	3.87009
Chr1	11195958	11196154	AT1G31300_1	196,	0,	15.5084	10.545
Chr1	11215755	11215949	AT1G31330_1	194,	0,	2.31913	2021.05
Chr1	11217054	11217252	AT1G31335_1	198,	0,	1.57813	3.39817
Chr1	11217933	11218125	AT1G31340_1	192,	0,	9.81676	36.4366
Chr1	11219330	11219427	AT1G31340_2	97,	0,	2.70738	36.4366
Chr1	11221654	11221852	AT1G31350_1	198,	0,	5.45171	7.20406
Chr1	11246965	11247266	AT1G31410_1	301,	0,	7.45728	13.9346
Chr1	11253466	11253616	AT1G31420_1	150,	0,	2.04166	38.6268
Chr1	11253715	11253815	AT1G31420_2	100,	0,	9.94625	38.6268
Chr1	11256603	11256703	AT1G31440_2	100,	0,	2.25093	5.57773
Chr1	11273671	11273870	AT1G31500_1	199,	0,	8.0296	9.02913
Chr1	11288526	11288627	AT1G31540_1	101,	0,	4.77893	4.27768
Chr1	11288870	11289070	AT1G31540_2	200,	0,	3.5835	4.27768
Chr1	11291143	11291343	AT1G31540_3	200,	0,	3.27911	4.27768
Chr1	11295592	11295740	AT1G31550_1	148,	0,	1.65167	9.16825
Chr1	11326350	11326500	AT1G31650_1	150,	0,	10.8841	9.16795
Chr1	11329721	11329822	AT1G31650_2	101,	0,	2.11583	9.16795
Chr1	11349892	11349991	AT1G31710_1	99,	0,	3.01265	8.04783
Chr1	11355292	11355391	AT1G31710_2	99,	0,	4.51311	8.04783
Chr1	11393956	11394303	AT1G31780_1	57,191,	0,156,	2.44144	17.4392
Chr1	11394549	11394649	AT1G31780_2	100,	0,	4.33902	17.4392
Chr1	11399417	11399615	AT1G31800_1	198,	0,	12.4683	54.6986
Chr1	11399656	11400055	AT1G31810_1	399,	0,	6.69083	6.36389
Chr1	11403024	11403921	AT1G31810_2	897,	0,	19.46	6.36389
Chr1	11410960	11411204	AT1G31812_1	244,	0,	3.44836	246.449
Chr1	11414792	11414939	AT1G31817_1	147,	0,	4.12986	12.9201
Chr1	11418784	11418933	AT1G31830_1	149,	0,	1.70711	6.19778
Chr1	11433414	11433615	AT1G31850_1	201,	0,	2.9637	24.0525
Chr1	11434157	11434354	AT1G31860_1	197,	0,	2.50539	12.0303
Chr1	11437377	11437596	AT1G31870_1	87,13,	0,206,	1.80723	5.22266
Chr1	11438437	11439483	AT1G31870_2	59,68,65,104,73,28,	0,336,492,652,845,1018,	2.1187	5.22266
Chr1	11439630	11440077	AT1G31870_3	6,342,	0,105,	8.59008	5.22266
Chr1	11459750	11460169	AT1G31910_1	42,53,105,	0,135,314,	2.49698	11.5103
Chr1	11461601	11461802	AT1G31910_2	201,	0,	7.31717	11.5103
Chr1	11462000	11462151	AT1G31910_3	151,	0,	2.81795	11.5103
Chr1	11466228	11466479	AT1G31930_1	251,	0,	4.3678	7.50076
Chr1	11468807	11469107	AT1G31930_2	300,	0,	3.21587	7.50076
Chr1	11470105	11470353	AT1G31940_1	248,	0,	3.39284	11.3629
Chr1	11479957	11480252	AT1G31970_1	295,	0,	8.19134	45.9725
Chr1	11531059	11531253	AT1G32050_1	194,	0,	15.811	51.0416
Chr1	11532695	11532845	AT1G32060_1	150,	0,	3.12661	494.932
Chr1	11534489	11534589	AT1G32060_2	100,	0,	4.74037	494.932
Chr1	11534752	11534850	AT1G32070_1	98,	0,	6.99581	35.7546
Chr1	11536122	11536291	AT1G32070_2	55,43,	0,126,	2.66067	35.7546
Chr1	11537437	11537585	AT1G32080_1	148,	0,	4.74239	169.262
Chr1	11540092	11540293	AT1G32090_1	201,	0,	3.44248	11.2414
Chr1	11540391	11540542	AT1G32090_2	151,	0,	1.5376	11.2414
Chr1	11547867	11547967	AT1G32100_1	100,	0,	4.24945	3.25818
Chr1	11560675	11560775	AT1G32130_1	100,	0,	2.02239	26.3364
Chr1	11560956	11561341	AT1G32130_2	35,264,	0,121,	6.09033	26.3364
Chr1	11567750	11568063	AT1G32150_1	9,78,60,	0,81,253,	2.06429	3.35703
Chr1	11593025	11593173	AT1G32190_1	148,	0,	6.4352	3.50101
Chr1	11595513	11595810	AT1G32190_2	297,	0,	2.52516	3.50101
Chr1	11601866	11602014	AT1G32200_1	148,	0,	12.126	37.3326
Chr1	11602110	11602307	AT1G32200_2	197,	0,	3.47838	37.3326
Chr1	11605849	11606095	AT1G32210_1	246,	0,	7.26327	14.2845
Chr1	11609580	11609678	AT1G32220_1	98,	0,	5.61162	48.0849
Chr1	11615884	11616182	AT1G32230_1	298,	0,	6.22199	24.3827
Chr1	11640653	11640751	AT1G32260_1	98,	0,	3.59286	5.62456
Chr1	11654546	11654738	AT1G32310_1	192,	0,	5.47012	5.17373
Chr1	11673958	11674157	AT1G32360_1	199,	0,	2.35457	12.3297
Chr1	11674939	11675039	AT1G32360_2	100,	0,	1.86009	12.3297
Chr1	11675138	11675288	AT1G32360_3	150,	0,	4.97639	12.3297
Chr1	11689162	11689411	AT1G32400_1	249,	0,	6.21623	29.9228
Chr1	11695241	11695480	AT1G32410_1	239,	0,	5.90913	16.2355
Chr1	11714864	11715063	AT1G32440_1	199,	0,	5.5586	13.2442
Chr1	11715294	11715393	AT1G32450_1	99,	0,	1.75367	2.17492
Chr1	11716323	11716501	AT1G32450_2	17,82,	0,96,	2.46599	2.17492
Chr1	11739400	11739499	AT1G32470_1	99,	0,	3.3431	387.887
Chr1	11742104	11742402	AT1G32490_1	298,	0,	7.75286	5.87108
Chr1	11746713	11748727	AT1G32490_2	50,64,72,60,55,34,87,66,107,	0,149,441,604,966,1143,1510,1739,1907,	4.31463	5.87108
Chr1	11749895	11750093	AT1G32500_1	198,	0,	8.09287	44.8502
Chr1	11758357	11758555	AT1G32520_1	198,	0,	2.73447	6.80537
Chr1	11759525	11759626	AT1G32530_1	101,	0,	3.75744	8.09738
Chr1	11760072	11760906	AT1G32530_2	109,140,	0,694,	3.90938	8.09738
Chr1	11761054	11761303	AT1G32530_3	249,	0,	2.89945	8.09738
Chr1	11767583	11767683	AT1G32540_1	100,	0,	1.66992	7.72528
Chr1	11767930	11768030	AT1G32540_2	100,	0,	1.19899	7.72528
Chr1	11771814	11772488	AT1G32550_1	199,45,	0,629,	10.6909	38.2151
Chr1	11784133	11784233	AT1G32580_1	100,	0,	1.81558	22.4476
Chr1	11785358	11785655	AT1G32580_2	297,	0,	5.80038	22.4476
Chr1	11827507	11827607	AT1G32700_1	100,	0,	1.7081	8.09883
Chr1	11829584	11829734	AT1G32700_2	150,	0,	3.75252	8.09883
Chr1	11846296	11846497	AT1G32750_1	201,	0,	4.85271	5.72109
Chr1	11846929	11847429	AT1G32750_2	500,	0,	5.48285	5.72109
Chr1	11848600	11849033	AT1G32750_3	98,252,	0,181,	2.37073	5.72109
Chr1	11853894	11854465	AT1G32750_4	51,92,107,	0,150,464,	3.08622	5.72109
Chr1	11874997	11875194	AT1G32790_1	197,	0,	8.62345	25.9244
Chr1	11885517	11886015	AT1G32810_1	498,	0,	5.26184	5.65853
Chr1	11908302	11908452	AT1G32860_1	150,	0,	2.01586	5.96865
Chr1	11908551	11908900	AT1G32860_2	349,	0,	2.8655	5.96865
Chr1	11955847	11955943	AT1G32990_1	96,	0,	2.23585	245.901
Chr1	11957066	11957306	AT1G32990_2	240,	0,	3.70433	245.901
Chr1	11966564	11967181	AT1G33040_1	51,79,61,	0,140,556,	8.67442	57.0003
Chr1	11967880	11968029	AT1G33050_1	149,	0,	7.76955	7.27696
Chr1	11975406	11976144	AT1G33060_1	309,150,91,	0,422,647,	3.4455	2.85482
Chr1	12005048	12005196	AT1G33110_1	148,	0,	2.64221	3.52242
Chr1	12012208	12012450	AT1G33120_1	242,	0,	7.61314	81.8353
Chr1	12024496	12024735	AT1G33140_1	239,	0,	5.336	117.584
Chr1	12049697	12049996	AT1G33230_1	299,	0,	9.71751	7.59071
Chr1	12051610	12051811	AT1G33240_1	201,	0,	2.59849	28.7775
Chr1	12051959	12052110	AT1G33240_2	151,	0,	2.72498	28.7775
Chr1	12052459	12052560	AT1G33240_3	101,	0,	3.28198	28.7775
Chr1	12052659	12052860	AT1G33240_4	201,	0,	3.22141	28.7775
Chr1	12053408	12053559	AT1G33240_5	151,	0,	2.75836	28.7775
Chr1	12054103	12054353	AT1G33240_6	250,	0,	2.14252	28.7775
Chr1	12057345	12057494	AT1G33250_1	149,	0,	4.66442	7.00684
Chr1	12067806	12068052	AT1G33265_1	246,	0,	7.82191	14.3509
Chr1	12068162	12068411	AT1G33270_1	249,	0,	8.68055	7.14801
Chr1	12075792	12076044	AT1G33290_1	21,127,	0,125,	6.94189	18.6842
Chr1	12086304	12086504	AT1G33330_1	200,	0,	8.83633	11.4613
Chr1	12095324	12095986	AT1G33360_1	43,168,239,	0,123,423,	3.28391	3.26205
Chr1	12099631	12099981	AT1G33390_1	350,	0,	4.88314	3.34499
Chr1	12109659	12109964	AT1G33410_1	154,45,	0,260,	6.88394	7.19833
Chr1	12121282	12121433	AT1G33420_1	151,	0,	1.70757	4.73524
Chr1	12150723	12150872	AT1G33490_1	149,	0,	5.36735	5.75832
Chr1	12157152	12157251	AT1G33520_1	99,	0,	4.25942	10.3663
Chr1	12157694	12158435	AT1G33520_2	741,	0,	6.39078	10.3663
Chr1	12204241	12204440	AT1G33680_1	16,84,	0,115,	1.58072	12.6344
Chr1	12204636	12204835	AT1G33680_2	199,	0,	2.69071	12.6344
Chr1	12208351	12208599	AT1G33680_3	248,	0,	5.30588	12.6344
Chr1	12244705	12244852	AT1G33780_1	147,	0,	1.5783	6.48682
Chr1	12245986	12246134	AT1G33780_2	148,	0,	2.1969	6.48682
Chr1	12266629	12266775	AT1G33810_1	146,	0,	8.45172	63.9088
Chr1	12326510	12327114	AT1G33930_1	77,132,186,	0,182,418,	3.29909	4.92123
Chr1	12347621	12348095	AT1G33960_1	66,132,97,	0,157,377,	3.96346	3.86743
Chr1	12349599	12349846	AT1G33970_1	247,	0,	3.04533	29.02
Chr1	12353024	12353123	AT1G33980_1	99,	0,	1.81357	8.56468
Chr1	12354731	12354928	AT1G33980_2	197,	0,	5.55655	8.56468
Chr1	12357782	12358031	AT1G33990_1	249,	0,	6.58447	13.7858
Chr1	12358006	12358200	AT1G34000_1	194,	0,	3.50032	93.1881
Chr1	12359549	12359790	AT1G34010_1	241,	0,	4.6599	9.86656
Chr1	12359885	12360547	AT1G34010_2	5,188,	0,474,	1.57401	9.86656
Chr1	12368951	12369151	AT1G34020_1	200,	0,	5.76573	6.09371
Chr1	12370160	12370305	AT1G34030_1	145,	0,	5.10915	112.424
Chr1	12419223	12419372	AT1G34110_2	149,	0,	1.57264	2.20895
Chr1	12432890	12433088	AT1G34130_1	198,	0,	6.82745	20.3324
Chr1	12439062	12439353	AT1G34150_1	13,184,	0,107,	3.15841	3.21338
Chr1	12455799	12456044	AT1G34200_1	245,	0,	1.97819	2.49252
Chr1	12492417	12492662	AT1G34270_1	245,	0,	2.92216	3.64614
Chr1	12494193	12494438	AT1G34270_2	245,	0,	1.81092	3.64614
Chr1	12535873	12536114	AT1G34350_1	241,	0,	4.67663	6.68667
Chr1	12545550	12546095	AT1G34360_1	545,	0,	4.46479	4.44788
Chr1	12551593	12551693	AT1G34370_1	100,	0,	1.26359	15.3375
Chr1	12552704	12553109	AT1G34380_1	234,115,	0,290,	2.51583	8.14894
Chr1	12587824	12588074	AT1G34430_1	250,	0,	5.35517	50.9828
Chr1	12589378	12589528	AT1G34430_2	150,	0,	1.8139	50.9828
Chr1	12589974	12590124	AT1G34430_3	150,	0,	1.51293	50.9828
Chr1	12606733	12606933	AT1G34470_1	200,	0,	8.46891	4.80926
Chr1	12646772	12646920	AT1G34550_1	148,	0,	4.95169	10.476
Chr1	12650039	12650385	AT1G34550_2	346,	0,	2.75787	10.476
Chr1	12687294	12687592	AT1G34630_1	298,	0,	3.54211	3.96749
Chr1	12743914	12744011	AT1G34760_1	97,	0,	5.87777	5.08763
Chr1	12748283	12748519	AT1G34770_1	36,112,	0,124,	2.02956	3.07281
Chr1	12748669	12748768	AT1G34780_1	99,	0,	5.20453	6.03465
Chr1	12868540	12868740	AT1G35160_1	200,	0,	7.45124	54.0751
Chr1	12877154	12877251	AT1G35180_1	97,	0,	2.72691	2.211
Chr1	12914510	12914709	AT1G35220_1	199,	0,	10.9419	4.2102
Chr1	12937135	12937548	AT1G35260_1	204,37,	0,376,	1.79348	3.81446
Chr1	12977814	12978012	AT1G35340_1	198,	0,	1.80067	19.5951
Chr1	12979651	12979898	AT1G35340_2	247,	0,	2.15492	19.5951
Chr1	13041708	13042061	AT1G35460_1	36,208,	0,145,	3.05552	4.06903
Chr1	13074635	13074934	AT1G35510_1	299,	0,	3.31783	6.57683
Chr1	13122328	13122526	AT1G35580_1	198,	0,	6.01046	21.275
Chr1	13208830	13208930	AT1G35680_1	100,	0,	1.29116	405.547
Chr1	13210180	13210329	AT1G35680_2	149,	0,	5.18082	405.547
Chr1	13277554	13277851	AT1G35780_1	297,	0,	3.24131	9.52645
Chr1	13451302	13451995	AT1G36050_1	52,93,53,	0,295,640,	1.53534	12.7981
Chr1	13453042	13453240	AT1G36050_2	198,	0,	12.1021	12.7981
Chr1	13642590	13642977	AT1G36280_1	12,288,	0,99,	2.47722	7.46448
Chr1	13670445	13670543	AT1G36310_1	98,	0,	1.74691	18.6933
Chr1	13670862	13671106	AT1G36310_2	244,	0,	5.38281	18.6933
Chr1	13673813	13674058	AT1G36320_1	245,	0,	5.68683	45.344
Chr1	13696237	13696385	AT1G36370_1	148,	0,	2.14278	8.26058
Chr1	13698297	13698543	AT1G36370_2	246,	0,	1.42587	8.26058
Chr1	13701433	13701583	AT1G36380_1	150,	0,	3.02267	4.41272
Chr1	13701711	13701811	AT1G36390_1	100,	0,	5.49468	28.0619
Chr1	13703146	13703524	AT1G36390_2	118,180,	0,198,	2.58796	28.0619
Chr1	14026743	14026941	AT1G36980_1	198,	0,	7.21967	36.36
Chr1	14027369	14027665	AT1G36990_1	296,	0,	6.46451	6.62902
Chr1	15651081	15651280	AT1G41880_1	199,	0,	3.78399	79.94
Chr1	15892295	15893734	AT1G42430_1	155,40,82,78,126,109,	0,386,661,848,1041,1330,	3.35522	10.2229
Chr1	15894281	15894478	AT1G42430_2	197,	0,	8.87238	10.2229
Chr1	15895345	15895594	AT1G42440_1	249,	0,	9.10534	11.8072
Chr1	15897263	15897813	AT1G42440_2	11,192,95,	0,130,455,	2.04711	11.8072
Chr1	15938495	15938875	AT1G42480_1	67,232,	0,148,	5.27473	10.975
Chr1	15976613	15976714	AT1G42540_1	101,	0,	8.80775	6.14799
Chr1	16127049	16127248	AT1G42960_1	199,	0,	5.53285	81.8444
Chr1	16129504	16129602	AT1G42970_1	98,	0,	1.96724	1005.29
Chr1	16135919	16136117	AT1G42990_1	198,	0,	2.82625	13.6427
Chr1	16136411	16137119	AT1G42990_2	101,97,	0,611,	3.98607	13.6427
Chr1	16228435	16228871	AT1G43130_1	338,9,	0,427,	6.77743	9.19794
Chr1	16275255	16275501	AT1G43190_1	246,	0,	6.31503	25.9879
Chr1	16398175	16398422	AT1G43560_1	247,	0,	8.13924	80.575
Chr1	16399731	16399831	AT1G43560_2	100,	0,	1.23587	80.575
Chr1	16410570	16410919	AT1G43580_1	349,	0,	4.18294	8.72779
Chr1	16425510	16425659	AT1G43620_1	149,	0,	7.31774	12.188
Chr1	16470302	16470451	AT1G43670_1	149,	0,	3.99163	145.142
Chr1	16484424	16484619	AT1G43700_1	195,	0,	1.64033	10.4183
Chr1	16484812	16485151	AT1G43700_2	138,106,	0,233,	2.93481	10.4183
Chr1	16485938	16486181	AT1G43700_3	243,	0,	5.72206	10.4183
Chr1	16618538	16618736	AT1G43850_1	198,	0,	2.09521	7.71625
Chr1	16620814	16620913	AT1G43850_2	99,	0,	2.14561	7.71625
Chr1	16621456	16622000	AT1G43850_3	544,	0,	3.37581	7.71625
Chr1	16620817	16620917	AT1G43860_1	100,	0,	2.1184	4.24989
Chr1	16621460	16622005	AT1G43860_2	545,	0,	3.38108	4.24989
Chr1	16622103	16622548	AT1G43860_3	445,	0,	5.15616	4.24989
Chr1	16624305	16624405	AT1G43860_4	100,	0,	1.67453	4.24989
Chr1	16654129	16654230	AT1G43900_1	101,	0,	2.27408	14.1739
Chr1	16655727	16655878	AT1G43900_2	151,	0,	5.55388	14.1739
Chr1	16708149	16708248	AT1G44000_1	99,	0,	5.47429	29.0559
Chr1	16796498	16796598	AT1G44170_1	100,	0,	8.86022	18.9762
Chr1	16848455	16848554	AT1G44446_1	99,	0,	4.68451	30.0634
Chr1	16873133	16873280	AT1G44575_1	147,	0,	4.81239	715.214
Chr1	16895082	16895378	AT1G44750_1	296,	0,	3.55858	6.69218
Chr1	16910976	16911077	AT1G44780_1	101,	0,	3.98711	3.68648
Chr1	16911794	16912270	AT1G44780_2	158,242,	0,234,	10.2058	3.68648
Chr1	16912202	16912399	AT1G44790_1	197,	0,	9.73549	11.5325
Chr1	16924179	16924525	AT1G44810_1	346,	0,	4.30465	9.9063
Chr1	16926394	16926690	AT1G44820_1	296,	0,	3.37314	6.87042
Chr1	16928359	16928606	AT1G44820_2	247,	0,	6.65534	6.87042
Chr1	16942265	16942461	AT1G44835_1	196,	0,	6.72059	13.5464
Chr1	16979600	16979959	AT1G44910_1	5,87,8,	0,178,351,	2.37749	8.53625
Chr1	16980567	16981104	AT1G44910_2	65,93,54,88,	0,152,311,449,	2.75876	8.53625
Chr1	16981854	16982865	AT1G44910_3	29,65,103,344,158,	0,110,276,463,853,	8.66851	8.53625
Chr1	17011446	17011730	AT1G45000_1	2,198,	0,86,	3.77715	47.9427
Chr1	17032972	17033170	AT1G45050_1	198,	0,	6.03549	5.31864
Chr1	17054228	17054681	AT1G45110_1	40,252,	0,201,	4.79533	2.73454
Chr1	17068884	17069219	AT1G45130_1	27,221,	0,114,	5.14179	9.9041
Chr1	17075138	17075287	AT1G45145_1	149,	0,	2.43546	16.2992
Chr1	17076219	17076318	AT1G45145_2	99,	0,	2.15427	16.2992
Chr1	17077484	17077859	AT1G45150_1	295,2,	0,373,	5.65212	3.17066
Chr1	17083570	17083818	AT1G45160_1	248,	0,	6.61876	9.2389
Chr1	17096028	17096273	AT1G45170_1	245,	0,	5.19706	7.79269
Chr1	17101606	17101855	AT1G45180_1	249,	0,	3.68929	3.06494
Chr1	17128424	17128575	AT1G45201_1	151,	0,	1.37592	37.4955
Chr1	17130448	17130697	AT1G45207_1	249,	0,	5.56193	5.185
Chr1	17130795	17131100	AT1G45207_2	129,21,	0,284,	1.91904	5.185
Chr1	17133411	17133611	AT1G45207_3	200,	0,	2.14445	5.185
Chr1	17169584	17169833	AT1G45230_1	249,	0,	6.59148	42.6322
Chr1	17165223	17165808	AT1G45249_1	271,30,98,	0,377,487,	4.14167	5.10683
Chr1	17172269	17172568	AT1G45332_1	299,	0,	6.51193	5.14761
Chr1	17180343	17180490	AT1G45474_1	147,	0,	4.4977	117.84
Chr1	17191510	17191660	AT1G45688_1	150,	0,	2.23445	34.1472
Chr1	17192668	17192868	AT1G45688_2	200,	0,	2.2272	34.1472
Chr1	17193015	17193116	AT1G45688_3	101,	0,	2.43798	34.1472
Chr1	17200292	17200393	AT1G45976_1	101,	0,	1.66872	8.20872
Chr1	17200491	17200692	AT1G45976_2	201,	0,	3.76496	8.20872
Chr1	17225547	17225697	AT1G46264_1	150,	0,	2.13789	2.80597
Chr1	17225845	17225995	AT1G46264_2	150,	0,	1.79895	2.80597
Chr1	17236971	17237121	AT1G46480_1	150,	0,	4.65187	2.01184
Chr1	17237736	17237837	AT1G46480_2	101,	0,	2.731	2.01184
Chr1	17276239	17276340	AT1G47056_1	101,	0,	1.49875	4.40014
Chr1	17298030	17298230	AT1G47200_1	200,	0,	3.35796	23.7878
Chr1	17298529	17298729	AT1G47200_2	200,	0,	2.74699	23.7878
Chr1	17308851	17309100	AT1G47240_1	249,	0,	4.7562	5.81978
Chr1	17321224	17321471	AT1G47260_1	247,	0,	6.88751	30.6665
Chr1	17331855	17331952	AT1G47278_1	97,	0,	7.52848	8.86761
Chr1	17338981	17339226	AT1G47290_1	245,	0,	8.98245	8.5852
Chr1	17344330	17344778	AT1G47310_1	448,	0,	4.00273	5.71869
Chr1	17352909	17353188	AT1G47330_1	133,66,	0,213,	1.63796	4.75803
Chr1	17353577	17353875	AT1G47330_2	298,	0,	6.66988	4.75803
Chr1	17372568	17372965	AT1G47380_1	397,	0,	5.37943	5.33566
Chr1	17395236	17395673	AT1G47410_1	437,	0,	7.94107	2.97298
Chr1	17395614	17396161	AT1G47420_1	216,28,	0,519,	3.71207	56.6453
Chr1	17427226	17427425	AT1G47490_1	199,	0,	11.8781	22.9066
Chr1	17434879	17435026	AT1G47500_1	147,	0,	13.1293	15.6788
Chr1	17454065	17454313	AT1G47530_1	248,	0,	7.11697	24.3382
Chr1	17463844	17463995	AT1G47550_1	151,	0,	13.1611	10.6811
Chr1	17483155	17483255	AT1G47570_1	100,	0,	2.62721	5.7856
Chr1	17518292	17518391	AT1G47640_1	99,	0,	10.5706	22.0464
Chr1	17558308	17558503	AT1G47710_1	195,	0,	1.89615	20.0155
Chr1	17560087	17560234	AT1G47710_2	147,	0,	13.4092	20.0155
Chr1	17561433	17562063	AT1G47720_1	343,54,	0,576,	1.5017	2.44549
Chr1	17566659	17566759	AT1G47740_1	100,	0,	1.48521	9.90649
Chr1	17568998	17569247	AT1G47740_2	249,	0,	7.31848	9.90649
Chr1	17613128	17613378	AT1G47830_1	250,	0,	8.0076	18.8196
Chr1	17634894	17635142	AT1G47870_1	248,	0,	2.81949	3.77483
Chr1	17647243	17647443	AT1G47900_1	200,	0,	10.3776	7.61417
Chr1	17647692	17648073	AT1G47900_2	43,57,	0,324,	1.57907	7.61417
Chr1	17649898	17650099	AT1G47900_3	201,	0,	1.78694	7.61417
Chr1	17651441	17651691	AT1G47900_4	250,	0,	3.63911	7.61417
Chr1	17687387	17688710	AT1G47970_1	308,391,	0,932,	7.89746	53.5048
Chr1	17717188	17717288	AT1G48030_1	100,	0,	4.10157	175.348
Chr1	17726321	17726600	AT1G48050_1	184,14,	0,265,	1.87247	5.47629
Chr1	17726698	17726996	AT1G48050_2	298,	0,	8.99679	5.47629
Chr1	17732059	17732422	AT1G48090_1	202,49,	0,314,	9.51571	6.1933
Chr1	17752919	17753209	AT1G48090_2	135,16,	0,274,	1.51302	6.1933
Chr1	17770036	17770236	AT1G48110_1	200,	0,	8.18862	11.8625
Chr1	17783864	17784063	AT1G48140_1	199,	0,	11.2789	7.30108
Chr1	17786596	17788115	AT1G48160_1	343,100,6,	0,1325,1513,	3.21348	15.2461
Chr1	17789564	17789905	AT1G48170_1	341,	0,	5.50053	3.95554
Chr1	17792097	17792292	AT1G48175_1	195,	0,	5.02077	3.19216
Chr1	17796859	17797052	AT1G48200_1	193,	0,	6.42014	7.54811
Chr1	17801737	17801985	AT1G48210_1	248,	0,	3.61107	18.8717
Chr1	17808543	17808843	AT1G48230_1	300,	0,	6.71205	13.7375
Chr1	17809086	17809235	AT1G48240_1	149,	0,	2.8881	10.7652
Chr1	17837534	17837683	AT1G48280_2	149,	0,	3.88576	2.11512
Chr1	17847330	17847476	AT1G48300_1	146,	0,	1.69362	95.4418
Chr1	17847662	17847759	AT1G48300_2	97,	0,	1.90384	95.4418
Chr1	17848469	17848717	AT1G48310_1	248,	0,	5.16844	4.71929
Chr1	17868182	17868332	AT1G48350_1	150,	0,	3.85355	175.402
Chr1	17874582	17874829	AT1G48370_1	247,	0,	3.97782	3.96803
Chr1	17878973	17879073	AT1G48380_2	100,	0,	2.0823	3.6762
Chr1	17886160	17886360	AT1G48410_1	200,	0,	7.11434	30.7861
Chr1	17896639	17896839	AT1G48420_1	200,	0,	10.8915	19.9118
Chr1	17902680	17902878	AT1G48430_1	198,	0,	5.82331	8.99428
Chr1	17908345	17908487	AT1G48440_1	142,	0,	5.47019	46.973
Chr1	17908651	17908752	AT1G48450_1	101,	0,	6.53064	56.4433
Chr1	17913099	17913295	AT1G48460_1	196,	0,	6.61554	9.46759
Chr1	17918501	17918650	AT1G48480_1	149,	0,	2.70693	25.8811
Chr1	17919633	17919732	AT1G48480_2	99,	0,	2.03039	25.8811
Chr1	17920574	17920722	AT1G48480_3	148,	0,	2.38469	25.8811
Chr1	17942515	17942765	AT1G48520_1	250,	0,	8.80777	27.5387
Chr1	17950617	17950939	AT1G48550_1	237,6,	0,316,	3.34217	3.77275
Chr1	17955201	17955548	AT1G48570_1	347,	0,	5.45307	11.6621
Chr1	17957471	17957670	AT1G48570_2	199,	0,	1.48183	11.6621
Chr1	17969005	17969255	AT1G48600_1	250,	0,	6.74357	64.9714
Chr1	17970709	17971106	AT1G48610_1	397,	0,	7.82295	10.0235
Chr1	17972381	17972481	AT1G48610_2	100,	0,	1.31191	10.0235
Chr1	17973104	17973253	AT1G48610_3	149,	0,	3.01408	10.0235
Chr1	17973936	17975204	AT1G48620_1	442,75,122,	0,535,1146,	2.40509	20.6345
Chr1	17976073	17976319	AT1G48620_2	246,	0,	3.88536	20.6345
Chr1	17981931	17982030	AT1G48630_1	99,	0,	2.48825	66.3209
Chr1	17985845	17986094	AT1G48635_1	249,	0,	5.84878	5.95063
Chr1	18036016	18036116	AT1G48760_1	100,	0,	2.15192	4.33711
Chr1	18036664	18036964	AT1G48760_2	300,	0,	6.17901	4.33711
Chr1	18040520	18040619	AT1G48770_1	99,	0,	2.79076	2.16589
Chr1	18042253	18042352	AT1G48780_1	99,	0,	2.41508	1.41319
Chr1	18043769	18043966	AT1G48790_1	197,	0,	7.05296	12.5585
Chr1	18059695	18059893	AT1G48830_1	198,	0,	4.87729	76.3797
Chr1	18068796	18068945	AT1G48860_1	149,	0,	8.73191	12.6668
Chr1	18081550	18081700	AT1G48880_1	150,	0,	2.87411	1.96981
Chr1	18084813	18085062	AT1G48900_1	249,	0,	9.15491	21.5412
Chr1	18085161	18085403	AT1G48900_2	139,10,	0,232,	2.47951	21.5412
Chr1	18101032	18101483	AT1G48920_1	259,90,	0,361,	4.12979	276.604
Chr1	18109153	18109302	AT1G48950_1	149,	0,	2.22583	5.26707
Chr1	18110040	18110288	AT1G48950_2	248,	0,	12.0163	5.26707
Chr1	18113762	18113912	AT1G48970_1	150,	0,	6.01357	7.2288
Chr1	18117238	18117487	AT1G48970_2	249,	0,	1.921	7.2288
Chr1	18132737	18132835	AT1G49010_1	98,	0,	6.99341	10.9623
Chr1	18150612	18150859	AT1G49050_1	247,	0,	2.64591	6.12439
Chr1	18153117	18153315	AT1G49050_2	198,	0,	5.07663	6.12439
Chr1	18174812	18175363	AT1G49130_1	108,332,	0,219,	3.30819	4.91145
Chr1	18175460	18175559	AT1G49130_2	99,	0,	2.20971	4.91145
Chr1	18176820	18177677	AT1G49140_1	193,6,	0,851,	2.61043	13.7658
[truncated: 11,563 more rows]

## Sheet: F1CL
Chr	Start	End	Peak_ID	Block_sizes	Block_starts	Enrichment	Gene expression (FPKM)
Chr1	6836	7366	AT1G01020_1	233,210,	0,320,	8.43452	3.65239
Chr1	23867	24267	AT1G01040_1	400,	0,	4.88732	4.52306
Chr1	30593	31227	AT1G01040_2	223,326,	0,308,	3.5052	4.52306
Chr1	31266	31413	AT1G01050_1	147,	0,	5.28523	49.1114
Chr1	45363	45561	AT1G01080_1	198,	0,	6.07143	47.0534
Chr1	46418	46517	AT1G01080_2	99,	0,	1.55001	47.0534
Chr1	46664	46763	AT1G01080_3	99,	0,	4.85181	47.0534
Chr1	47582	47733	AT1G01090_1	151,	0,	2.61985	107.832
Chr1	49004	49204	AT1G01090_2	200,	0,	1.89323	107.832
Chr1	50145	50336	AT1G01100_1	191,	0,	7.36726	223.107
Chr1	64214	64459	AT1G01140_1	245,	0,	5.86341	18.9864
Chr1	67382	67530	AT1G01140_2	148,	0,	1.46951	18.9864
Chr1	73715	74096	AT1G01160_1	25,275,	0,106,	7.92541	12.8975
Chr1	73977	74118	AT1G01170_1	141,	0,	8.11817	55.6089
Chr1	89594	90207	AT1G01210_1	151,46,	0,567,	6.60152	6.38725
Chr1	95432	95631	AT1G01220_1	199,	0,	8.62825	7.80675
Chr1	99045	99191	AT1G01230_1	146,	0,	4.91585	15.1458
Chr1	101443	101740	AT1G01240_1	297,	0,	2.52595	2.54477
Chr1	109879	109978	AT1G01260_1	99,	0,	2.03567	3.71793
Chr1	110420	110568	AT1G01260_2	148,	0,	2.11341	3.71793
Chr1	137914	138113	AT1G01350_1	199,	0,	5.76654	7.28633
Chr1	148365	148515	AT1G01390_1	150,	0,	3.51786	4.08465
Chr1	154638	154786	AT1G01420_1	148,	0,	2.69694	3.15567
Chr1	155814	155962	AT1G01420_2	148,	0,	2.07122	3.15567
Chr1	158326	158426	AT1G01430_1	100,	0,	1.70017	14.5132
Chr1	159826	159975	AT1G01440_1	149,	0,	5.15385	5.23083
Chr1	172797	172948	AT1G01470_1	151,	0,	3.03483	37.133
Chr1	180215	180713	AT1G01490_1	498,	0,	8.08156	14.2566
Chr1	189824	190124	AT1G01510_1	300,	0,	10.9612	10.6485
Chr1	198341	198639	AT1G01540_1	298,	0,	6.42164	32.9338
Chr1	222738	222935	AT1G01610_1	197,	0,	3.23304	29.7468
Chr1	232939	233288	AT1G01650_1	349,	0,	12.6919	10.6775
Chr1	243516	243716	AT1G01670_1	200,	0,	3.0302	1.62966
Chr1	251593	251776	AT1G01690_1	1,97,	0,86,	1.4325	2.08336
Chr1	265983	266227	AT1G01710_1	244,	0,	21.1978	12.5879
Chr1	269840	269987	AT1G01725_1	147,	0,	5.09157	5.09844
Chr1	271839	272089	AT1G01730_1	250,	0,	3.53367	9.3119
Chr1	283948	284196	AT1G01780_1	248,	0,	9.23642	5.38931
Chr1	290902	291103	AT1G01790_1	201,	0,	19.6852	45.1544
Chr1	296049	296195	AT1G01820_1	146,	0,	13.9767	29.1523
Chr1	298650	298950	AT1G01830_1	300,	0,	3.06174	6.10953
Chr1	304164	304358	AT1G01840_1	194,	0,	4.69347	1.78623
Chr1	304181	304330	AT1G01860_1	149,	0,	5.9574	5.20442
Chr1	313198	313643	AT1G01910_1	445,	0,	5.02474	18.9586
Chr1	319320	319618	AT1G01920_1	298,	0,	8.01761	4.79189
Chr1	319866	320446	AT1G01930_1	279,45,67,	0,385,513,	4.34084	4.21925
Chr1	324673	324868	AT1G01940_1	195,	0,	12.2409	10.8261
Chr1	330322	330471	AT1G01950_1	149,	0,	9.79696	5.62203
Chr1	330637	330837	AT1G01960_1	200,	0,	13.6287	16.742
Chr1	339941	340039	AT1G01970_1	98,	0,	6.35545	21.5693
Chr1	343312	343412	AT1G01990_1	100,	0,	3.02694	9.25545
Chr1	343905	344104	AT1G01990_2	199,	0,	2.90989	9.25545
Chr1	352710	352858	AT1G02020_1	148,	0,	7.33423	7.5227
Chr1	354236	354533	AT1G02020_2	297,	0,	3.93222	7.5227
Chr1	354680	354779	AT1G02020_3	99,	0,	2.48927	7.5227
Chr1	365751	365996	AT1G02065_1	245,	0,	3.92001	1.75343
Chr1	387325	387701	AT1G02090_1	178,118,	0,258,	9.4945	12.7758
Chr1	392419	392816	AT1G02100_1	397,	0,	13.5828	13.2038
Chr1	393076	393471	AT1G02110_1	395,	0,	2.24674	10.0424
Chr1	394101	394275	AT1G02110_2	52,48,	0,126,	1.80061	10.0424
Chr1	395035	395134	AT1G02110_3	99,	0,	2.14003	10.0424
Chr1	395281	395528	AT1G02110_4	247,	0,	7.24475	10.0424
Chr1	399105	399903	AT1G02120_1	5,212,420,	0,76,378,	6.24346	25.4631
Chr1	400127	400369	AT1G02130_1	242,	0,	10.8932	19.7637
Chr1	403245	403391	AT1G02140_1	146,	0,	20.2559	76.4856
Chr1	408421	408619	AT1G02145_1	198,	0,	16.4243	8.19781
Chr1	410432	410532	AT1G02150_1	100,	0,	4.85323	56.0366
Chr1	411398	411585	AT1G02160_1	187,	0,	5.13835	17.344
Chr1	411953	412196	AT1G02170_1	243,	0,	2.04732	14.0342
Chr1	413289	413554	AT1G02170_2	6,188,	0,77,	4.54747	14.0342
Chr1	413569	413716	AT1G02180_1	147,	0,	6.75012	4.77616
Chr1	440546	440795	AT1G02260_1	249,	0,	3.1568	5.84846
Chr1	443216	443513	AT1G02270_1	297,	0,	7.7619	9.67117
Chr1	448519	448617	AT1G02280_1	98,	0,	15.8637	42.6565
Chr1	455323	455470	AT1G02300_1	147,	0,	5.37994	12.2211
Chr1	457921	458116	AT1G02305_1	195,	0,	8.67016	36.0596
Chr1	462094	462294	AT1G02330_1	200,	0,	4.3558	7.85164
Chr1	462776	463124	AT1G02330_2	24,124,2,	0,99,346,	1.71296	7.85164
Chr1	463222	463469	AT1G02330_3	101,49,	0,198,	2.39704	7.85164
Chr1	476363	476513	AT1G02370_1	150,	0,	4.08014	2.89147
Chr1	492635	492930	AT1G02410_1	295,	0,	13.7412	8.51849
Chr1	498299	498395	AT1G02450_1	96,	0,	3.03095	6.33089
Chr1	513896	514117	AT1G02475_1	138,12,	0,209,	6.20032	38.1548
Chr1	515124	515273	AT1G02475_2	149,	0,	2.98461	38.1548
Chr1	520202	520301	AT1G02500_1	99,	0,	2.69266	125.127
Chr1	539830	540028	AT1G02560_1	198,	0,	12.6196	189.033
Chr1	581928	582167	AT1G02680_1	239,	0,	8.54126	5.98779
Chr1	592178	592327	AT1G02720_1	149,	0,	2.06427	4.45484
Chr1	593965	594165	AT1G02720_2	200,	0,	4.85285	4.45484
Chr1	604099	604291	AT1G02750_1	192,	0,	3.53271	4.52571
Chr1	607943	608136	AT1G02780_1	193,	0,	6.06478	391.231
Chr1	629596	629746	AT1G02840_1	150,	0,	17.2196	26.8909
Chr1	636871	637212	AT1G02860_1	15,235,	0,106,	3.2743	2.67284
Chr1	637313	637463	AT1G02870_1	150,	0,	7.83301	13.7233
Chr1	642853	643103	AT1G02880_1	250,	0,	5.39752	7.09687
Chr1	655616	655813	AT1G02910_1	197,	0,	8.60584	35.2025
Chr1	666954	667333	AT1G02960_1	114,183,	0,196,	10.1835	3.27535
Chr1	683967	684118	AT1G02990_2	151,	0,	1.92081	2.32973
Chr1	687844	688144	AT1G03000_1	300,	0,	13.628	6.52459
Chr1	703535	703782	AT1G03030_1	247,	0,	7.53344	7.50352
Chr1	703944	704288	AT1G03040_1	344,	0,	5.95788	17.7493
Chr1	706394	706542	AT1G03040_2	148,	0,	2.03019	17.7493
Chr1	710066	710269	AT1G03055_1	70,29,	0,174,	5.62016	3.39425
Chr1	711660	711808	AT1G03055_2	148,	0,	1.46552	3.39425
Chr1	712539	712840	AT1G03060_1	301,	0,	11.2064	4.56018
Chr1	713989	714090	AT1G03060_2	101,	0,	1.77341	4.56018
Chr1	731752	732250	AT1G03080_1	498,	0,	4.05255	5.39233
Chr1	743686	744035	AT1G03090_1	30,221,	0,128,	11.4474	4.41072
Chr1	751680	751877	AT1G03110_1	197,	0,	4.13239	5.43617
Chr1	753927	754119	AT1G03130_1	192,	0,	3.26656	271.144
Chr1	755526	755770	AT1G03140_1	244,	0,	4.95417	15.5135
Chr1	758254	758583	AT1G03150_1	5,234,	0,95,	5.89242	9.72521
Chr1	784196	784296	AT1G03210_1	100,	0,	5.02611	9.78674
Chr1	787080	787329	AT1G03220_1	249,	0,	3.38229	15.1298
Chr1	790016	790361	AT1G03230_1	345,	0,	3.89946	8.64523
Chr1	793411	793655	AT1G03250_1	244,	0,	8.5378	12.1433
Chr1	795547	795747	AT1G03260_1	200,	0,	10.5885	4.61097
Chr1	806669	806967	AT1G03280_1	298,	0,	12.6916	11.3407
Chr1	809439	809998	AT1G03290_1	143,117,88,	0,232,471,	2.2727	6.40573
Chr1	810587	810836	AT1G03290_2	249,	0,	13.0299	6.40573
Chr1	816563	816663	AT1G03310_1	100,	0,	2.60192	24.4795
Chr1	818030	818224	AT1G03330_1	194,	0,	13.3182	17.7661
Chr1	823273	823521	AT1G03350_1	248,	0,	2.83369	15.4823
Chr1	828810	828910	AT1G03365_1	100,	0,	2.16272	4.13382
Chr1	829058	829995	AT1G03365_2	124,275,	0,662,	2.75622	4.13382
Chr1	830749	830849	AT1G03370_1	100,	0,	2.17894	7.65614
Chr1	834612	834712	AT1G03370_2	100,	0,	1.98553	7.65614
Chr1	834911	835012	AT1G03370_3	101,	0,	1.77514	7.65614
Chr1	835111	835311	AT1G03370_4	200,	0,	8.37717	7.65614
Chr1	840280	840925	AT1G03380_1	131,418,	0,227,	7.44534	6.40687
Chr1	842805	842953	AT1G03400_1	148,	0,	7.12664	18.8711
Chr1	852400	852550	AT1G03440_1	150,	0,	1.8702	8.19344
Chr1	853248	853349	AT1G03440_2	101,	0,	2.31431	8.19344
Chr1	866384	866629	AT1G03470_1	245,	0,	3.95355	3.00705
Chr1	869101	869301	AT1G03475_1	200,	0,	9.89428	185.804
Chr1	877959	878060	AT1G03520_1	101,	0,	4.20347	3.17903
Chr1	880828	881027	AT1G03530_2	199,	0,	2.30124	4.61423
Chr1	881472	881572	AT1G03530_3	100,	0,	2.66379	4.61423
Chr1	882311	882708	AT1G03530_4	397,	0,	7.38735	4.61423
Chr1	891596	891696	AT1G03560_2	100,	0,	1.9297	2.92578
Chr1	894336	894682	AT1G03590_1	346,	0,	3.88319	4.17842
Chr1	901126	901275	AT1G03610_1	149,	0,	2.03942	4.48368
Chr1	909202	909303	AT1G03630_1	101,	0,	7.21084	137.636
Chr1	916914	917059	AT1G03680_1	145,	0,	6.45477	338.023
Chr1	920292	920542	AT1G03687_1	250,	0,	7.66169	6.36466
Chr1	930958	931252	AT1G03730_1	294,	0,	2.20146	2.90884
Chr1	936452	936553	AT1G03740_1	101,	0,	1.68667	5.15659
Chr1	936802	937002	AT1G03740_2	200,	0,	9.15171	5.15659
Chr1	941110	941210	AT1G03760_1	100,	0,	12.8949	3.22314
Chr1	942309	942409	AT1G03760_2	100,	0,	2.09789	3.22314
Chr1	948307	948590	AT1G03780_1	36,162,	0,121,	3.63822	2.88961
Chr1	960083	960329	AT1G03820_1	246,	0,	4.47093	7.50431
Chr1	979406	979557	AT1G03860_1	151,	0,	15.7341	33.1923
Chr1	983058	983399	AT1G03870_1	341,	0,	2.09	43.0521
Chr1	997232	997776	AT1G03910_1	44,72,63,22,	0,185,371,522,	3.77566	12.8956
Chr1	1000179	1000429	AT1G03910_2	250,	0,	18.4119	12.8956
Chr1	1008024	1008271	AT1G03930_1	247,	0,	8.92778	13.1
Chr1	1011199	1011511	AT1G03950_1	234,10,	0,302,	6.82303	9.82307
Chr1	1014433	1014532	AT1G03960_1	99,	0,	1.99606	2.9853
Chr1	1018701	1018950	AT1G03970_1	249,	0,	2.76132	12.4423
Chr1	1040063	1040163	AT1G04020_1	100,	0,	2.95451	5.34532
Chr1	1050652	1050751	AT1G04070_1	99,	0,	7.0464	5.34964
Chr1	1056476	1056777	AT1G04080_1	301,	0,	17.8512	19.6365
Chr1	1064561	1064910	AT1G04120_1	349,	0,	7.33485	9.92776
Chr1	1075592	1075991	AT1G04140_1	399,	0,	8.77366	25.4683
Chr1	1099653	1099852	AT1G04170_1	199,	0,	14.575	39.5678
Chr1	1106500	1106647	AT1G04190_1	147,	0,	10.9991	13.7196
Chr1	1113859	1114007	AT1G04200_1	148,	0,	9.61056	6.13643
Chr1	1119540	1119640	AT1G04210_1	100,	0,	11.0735	8.40486
Chr1	1141751	1141849	AT1G04270_1	98,	0,	12.8738	227.571
Chr1	1144116	1144423	AT1G04280_2	8,190,	0,117,	2.91771	2.51615
Chr1	1147641	1147740	AT1G04290_1	99,	0,	3.77343	11.353
Chr1	1148286	1148385	AT1G04290_2	99,	0,	2.65434	11.353
Chr1	1148663	1148864	AT1G04300_1	201,	0,	4.36294	7.94082
Chr1	1149413	1149663	AT1G04300_2	250,	0,	2.78409	7.94082
Chr1	1150755	1151041	AT1G04300_3	127,74,	0,212,	9.2112	7.94082
Chr1	1163103	1163302	AT1G04340_1	199,	0,	7.76105	12.3316
Chr1	1166544	1166742	AT1G04350_1	198,	0,	4.76006	17.4793
Chr1	1189238	1189386	AT1G04410_1	148,	0,	8.00442	330.721
Chr1	1201228	1201379	AT1G04430_1	151,	0,	2.48677	33.4685
Chr1	1205664	1205763	AT1G04440_1	99,	0,	4.69925	15.6314
Chr1	1217229	1217326	AT1G04480_1	97,	0,	11.344	93.2413
Chr1	1230596	1230797	AT1G04510_1	201,	0,	19.1594	19.5767
Chr1	1231647	1231844	AT1G04520_1	197,	0,	3.78611	9.67717
Chr1	1233835	1233983	AT1G04520_2	148,	0,	5.23793	9.67717
Chr1	1234224	1234422	AT1G04530_1	198,	0,	6.35936	22.6672
Chr1	1235665	1235813	AT1G04530_2	148,	0,	2.90081	22.6672
Chr1	1241149	1241247	AT1G04550_1	98,	0,	2.60255	13.322
Chr1	1241864	1242060	AT1G04550_2	196,	0,	3.04983	13.322
Chr1	1243896	1244095	AT1G04555_1	199,	0,	12.8812	3.59618
Chr1	1258653	1258898	AT1G04590_1	245,	0,	13.716	10.2487
Chr1	1282705	1282953	AT1G04620_1	248,	0,	6.35997	26.2353
Chr1	1289783	1289982	AT1G04630_1	199,	0,	8.16321	28.5532
Chr1	1301191	1301289	AT1G04660_2	98,	0,	2.14171	2.35816
Chr1	1315432	1315726	AT1G04690_1	294,	0,	4.62311	40.3226
Chr1	1324495	1324693	AT1G04710_1	198,	0,	12.4999	15.9011
Chr1	1331613	1331862	AT1G04750_1	249,	0,	19.6177	34.1624
Chr1	1337651	1337800	AT1G04770_1	149,	0,	1.73742	6.4874
Chr1	1348278	1348377	AT1G04790_1	99,	0,	12.4169	6.19031
Chr1	1348621	1348868	AT1G04790_2	247,	0,	7.03172	6.19031
Chr1	1348646	1348989	AT1G04800_1	343,	0,	6.82546	57.1508
Chr1	1355166	1355366	AT1G04810_1	200,	0,	8.11341	14.5039
Chr1	1356280	1356478	AT1G04820_1	198,	0,	4.13185	206.543
Chr1	1365155	1365402	AT1G04850_1	247,	0,	19.0801	29.7306
Chr1	1366098	1366862	AT1G04850_2	30,82,68,61,56,	0,119,292,502,708,	3.56229	29.7306
Chr1	1373381	1373480	AT1G04870_1	99,	0,	8.59131	12.963
Chr1	1387307	1387895	AT1G04900_1	27,469,	0,119,	9.93444	4.06405
Chr1	1387920	1388021	AT1G04910_1	101,	0,	14.7535	10.6632
Chr1	1400580	1400780	AT1G04940_1	200,	0,	5.40527	1.83513
Chr1	1403182	1403380	AT1G04950_1	198,	0,	10.8142	6.52776
Chr1	1407869	1408115	AT1G04960_1	246,	0,	9.80361	7.42487
Chr1	1413477	1413577	AT1G04970_1	100,	0,	19.9494	7.43422
Chr1	1413741	1413987	AT1G04980_1	246,	0,	5.01195	13.8844
Chr1	1416390	1416924	AT1G04985_1	389,56,	0,478,	2.98323	10.5211
Chr1	1438145	1438392	AT1G05030_1	247,	0,	14.0301	3.62022
Chr1	1450750	1450851	AT1G05055_2	101,	0,	3.86145	6.80884
Chr1	1451099	1451247	AT1G05060_1	148,	0,	9.04473	10.1636
Chr1	1457105	1457205	AT1G05070_1	100,	0,	8.29386	13.0085
Chr1	1471471	1471852	AT1G05120_1	225,73,	0,308,	9.96265	4.77537
Chr1	1482691	1482839	AT1G05140_1	148,	0,	2.70784	45.2742
Chr1	1483912	1484010	AT1G05140_2	98,	0,	4.45769	45.2742
Chr1	1491120	1491367	AT1G05170_1	247,	0,	5.47018	5.96177
Chr1	1498261	1498459	AT1G05180_1	198,	0,	18.0056	11.6595
Chr1	1502489	1502633	AT1G05190_1	144,	0,	1.92135	440.107
Chr1	1508852	1509102	AT1G05200_1	250,	0,	4.49385	6.54455
Chr1	1509244	1509387	AT1G05205_1	143,	0,	4.75435	18.5108
Chr1	1531740	1531840	AT1G05270_1	100,	0,	5.14926	11.933
Chr1	1554893	1555132	AT1G05320_1	7,142,	0,97,	2.32805	4.40225
Chr1	1560726	1560972	AT1G05350_1	246,	0,	12.4591	11.4749
Chr1	1577514	1577763	AT1G05380_1	249,	0,	2.23827	7.73664
Chr1	1577960	1578109	AT1G05380_2	149,	0,	1.99497	7.73664
Chr1	1582324	1582672	AT1G05380_3	348,	0,	5.61256	7.73664
Chr1	1585468	1585615	AT1G05410_1	147,	0,	6.78005	4.79837
Chr1	1594150	1594298	AT1G05430_1	148,	0,	3.33656	13.5086
Chr1	1601246	1601844	AT1G05460_1	598,	0,	7.63394	3.82289
Chr1	1611095	1611345	AT1G05470_1	66,84,	0,166,	1.92967	2.71762
Chr1	1628939	1629189	AT1G05500_1	250,	0,	19.3904	12.1711
Chr1	1630898	1631098	AT1G05520_1	200,	0,	11.9428	11.7502
Chr1	1640682	1640781	AT1G05540_1	99,	0,	3.2938	5.89028
Chr1	1645705	1646203	AT1G05560_1	498,	0,	3.72889	21.7094
Chr1	1647673	1647973	AT1G05570_1	300,	0,	7.79713	6.54322
Chr1	1669944	1670094	AT1G05590_1	150,	0,	1.92589	6.20101
Chr1	1671554	1671852	AT1G05590_2	298,	0,	2.38381	6.20101
Chr1	1681563	1681661	AT1G05620_1	98,	0,	3.54955	7.54797
Chr1	1682372	1682622	AT1G05630_1	250,	0,	2.06485	7.72751
Chr1	1687213	1687363	AT1G05630_2	150,	0,	9.15327	7.72751
Chr1	1717043	1717241	AT1G05710_1	198,	0,	5.58627	2.80354
Chr1	1717487	1717685	AT1G05720_1	198,	0,	7.20128	10.0745
Chr1	1732410	1732608	AT1G05785_1	198,	0,	6.69295	1.92189
Chr1	1736850	1736950	AT1G05790_1	100,	0,	1.58297	5.66337
Chr1	1737198	1737434	AT1G05790_2	3,148,	0,88,	4.3733	5.66337
Chr1	1749283	1749429	AT1G05810_1	146,	0,	3.12832	6.66959
Chr1	1754723	1754971	AT1G05830_1	248,	0,	3.18498	4.34739
Chr1	1761611	1761810	AT1G05830_2	199,	0,	8.6739	4.34739
Chr1	1762783	1762984	AT1G05840_1	201,	0,	9.43722	6.17604
Chr1	1766648	1766894	AT1G05850_1	246,	0,	5.81708	249.103
Chr1	1773185	1773285	AT1G05870_2	100,	0,	3.55383	9.31829
Chr1	1784180	1784527	AT1G05890_1	347,	0,	10.2801	11.207
Chr1	1789489	1789688	AT1G05900_1	199,	0,	8.27364	5.9189
Chr1	1791708	1791957	AT1G05910_1	249,	0,	7.92925	7.45231
Chr1	1801208	1801358	AT1G05940_1	150,	0,	11.9324	14.5977
Chr1	1808058	1808554	AT1G05960_1	496,	0,	14.4382	11.3595
Chr1	1816072	1816321	AT1G05970_1	249,	0,	7.0673	2.95881
Chr1	1821546	1821795	AT1G06000_1	249,	0,	3.30071	48.3233
Chr1	1823710	1823902	AT1G06010_1	192,	0,	10.325	5.86329
Chr1	1828536	1828684	AT1G06040_1	148,	0,	4.65801	22.3594
Chr1	1834274	1834373	AT1G06060_1	99,	0,	1.67736	7.58657
Chr1	1834665	1834812	AT1G06060_2	147,	0,	4.78035	7.58657
Chr1	1834926	1835464	AT1G06070_1	538,	0,	6.19811	5.70165
Chr1	1846110	1846211	AT1G06080_1	101,	0,	2.40342	3.86417
Chr1	1853108	1853257	AT1G06110_1	149,	0,	7.7118	7.54009
Chr1	1857854	1858100	AT1G06130_1	246,	0,	10.4328	13.0021
Chr1	1869038	1869188	AT1G06150_1	150,	0,	11.999	9.70927
Chr1	1894385	1894627	AT1G06200_1	242,	0,	19.868	19.8048
Chr1	1897275	1897680	AT1G06210_1	29,119,	0,286,	2.06486	8.39633
Chr1	1898844	1899188	AT1G06210_2	344,	0,	4.25117	8.39633
Chr1	1904547	1904847	AT1G06220_1	300,	0,	12.7847	18.0419
Chr1	1908505	1908804	AT1G06230_1	299,	0,	1.67978	10.0925
Chr1	1909351	1909650	AT1G06230_2	299,	0,	2.20272	10.0925
Chr1	1910155	1910807	AT1G06230_3	72,377,	0,275,	8.05551	10.0925
Chr1	1911393	1911716	AT1G06240_1	174,75,	0,248,	2.76237	11.7074
Chr1	1912896	1913146	AT1G06240_2	250,	0,	8.31164	11.7074
Chr1	1926030	1926130	AT1G06290_1	100,	0,	7.68519	19.9452
Chr1	1950414	1950712	AT1G06390_1	298,	0,	9.82289	17.8647
Chr1	1950645	1950745	AT1G06400_1	100,	0,	32.4902	16.087
Chr1	1950892	1951190	AT1G06400_2	298,	0,	7.65421	16.087
Chr1	1958318	1958717	AT1G06410_1	399,	0,	5.33703	20.8863
Chr1	1960130	1960281	AT1G06430_1	151,	0,	9.55555	20.4112
Chr1	1967120	1967219	AT1G06450_1	99,	0,	4.13264	2.50834
Chr1	1967184	1967283	AT1G06460_1	99,	0,	3.26541	119.024
Chr1	1973442	1973738	AT1G06470_1	296,	0,	17.084	8.44402
Chr1	1990334	1990483	AT1G06500_1	149,	0,	2.33605	7.6032
Chr1	1990581	1990730	AT1G06500_2	149,	0,	15.4001	7.6032
Chr1	1993599	1993793	AT1G06510_1	194,	0,	4.75419	15.2155
Chr1	1990682	1990877	AT1G06515_1	195,	0,	9.49852	10.0897
Chr1	2003675	2004029	AT1G06550_1	207,42,	0,312,	6.58691	15.2674
Chr1	2011981	2012128	AT1G06570_1	147,	0,	2.89286	5.69469
Chr1	2033815	2033915	AT1G06640_1	100,	0,	6.18813	16.1356
Chr1	2035473	2035724	AT1G06645_1	251,	0,	3.52005	9.37512
Chr1	2037118	2037366	AT1G06650_1	248,	0,	8.56482	29.9952
Chr1	2037359	2037458	AT1G06660_1	99,	0,	16.0541	1.10756
Chr1	2047158	2047556	AT1G06670_1	398,	0,	4.26163	6.46123
Chr1	2049642	2049838	AT1G06690_1	196,	0,	4.46678	24.4907
Chr1	2052568	2052817	AT1G06700_1	249,	0,	13.2856	20.6015
Chr1	2060542	2060985	AT1G06720_1	234,114,	0,329,	5.66516	4.78523
Chr1	2062737	2063590	AT1G06720_2	84,94,269,	0,154,584,	2.5153	4.78523
Chr1	2067608	2067758	AT1G06730_1	150,	0,	1.7696	6.55186
Chr1	2070005	2070405	AT1G06730_2	400,	0,	9.8372	6.55186
Chr1	2089252	2089544	AT1G06790_1	292,	0,	13.712	4.06019
Chr1	2089465	2089613	AT1G06800_1	148,	0,	9.2037	3.34061
Chr1	2090315	2090463	AT1G06800_2	148,	0,	1.51726	3.34061
Chr1	2105245	2105591	AT1G06850_1	346,	0,	3.61283	5.01404
Chr1	2110789	2110937	AT1G06870_1	148,	0,	12.1589	8.28448
Chr1	2111471	2111821	AT1G06890_1	350,	0,	5.96158	28.8585
Chr1	2115012	2115361	AT1G06900_1	349,	0,	4.79724	11.4871
Chr1	2120211	2120497	AT1G06900_2	20,180,	0,106,	5.57034	11.4871
Chr1	2130152	2130402	AT1G06950_1	250,	0,	12.0408	64.5315
Chr1	2135453	2135603	AT1G06950_2	150,	0,	2.07005	64.5315
Chr1	2137102	2137299	AT1G06960_1	197,	0,	1.63893	6.85922
Chr1	2137494	2137740	AT1G06960_2	246,	0,	16.236	6.85922
Chr1	2154971	2155220	AT1G07010_1	249,	0,	7.46802	21.7984
Chr1	2158462	2158612	AT1G07030_1	150,	0,	6.19622	9.93106
Chr1	2161017	2161264	AT1G07040_1	247,	0,	5.14215	9.24669
Chr1	2162894	2163091	AT1G07040_2	197,	0,	2.39064	9.24669
Chr1	2169663	2169811	AT1G07070_1	148,	0,	7.15447	24.5976
Chr1	2171802	2171998	AT1G07080_1	196,	0,	8.4782	36.5891
Chr1	2174790	2174939	AT1G07090_1	149,	0,	2.33904	10.8085
Chr1	2178170	2178420	AT1G07110_1	250,	0,	7.72194	51.1259
Chr1	2192020	2192217	AT1G07140_1	197,	0,	4.88566	114.544
Chr1	2192362	2192559	AT1G07140_2	197,	0,	3.27007	114.544
Chr1	2200928	2201174	AT1G07170_1	246,	0,	7.3058	5.28063
Chr1	2216692	2216934	AT1G07210_1	242,	0,	12.2221	18.0544
Chr1	2216974	2217224	AT1G07220_1	250,	0,	6.7006	7.78149
Chr1	2218798	2219450	AT1G07220_2	109,191,	0,461,	1.6074	7.78149
Chr1	2220328	2220575	AT1G07230_1	247,	0,	6.19368	12.3783
Chr1	2245792	2245992	AT1G07300_1	200,	0,	2.57328	2.07147
Chr1	2247561	2247712	AT1G07310_1	151,	0,	3.51671	12.0758
Chr1	2248160	2248411	AT1G07310_2	251,	0,	2.38609	12.0758
Chr1	2250235	2250431	AT1G07320_1	196,	0,	5.64034	256.984
Chr1	2257532	2257830	AT1G07350_1	298,	0,	3.91547	12.4394
Chr1	2260414	2260563	AT1G07360_1	149,	0,	7.26982	16.4741
Chr1	2260709	2260808	AT1G07360_2	99,	0,	1.74154	16.4741
Chr1	2280058	2280256	AT1G07420_1	198,	0,	15.482	12.4199
Chr1	2286378	2286476	AT1G07440_1	98,	0,	4.53319	48.2959
Chr1	2294237	2294558	AT1G07470_1	17,232,	0,89,	17.1738	6.48924
Chr1	2296468	2296854	AT1G07480_1	261,87,	0,299,	11.2117	4.73227
Chr1	2309315	2309514	AT1G07510_1	199,	0,	2.84159	4.25752
Chr1	2313976	2314126	AT1G07530_1	150,	0,	2.71903	7.80851
Chr1	2339292	2339391	AT1G07590_1	99,	0,	1.54479	23.3506
Chr1	2341590	2341812	AT1G07610_1	68,29,	0,193,	2.39235	14.8277
Chr1	2342246	2342493	AT1G07615_1	247,	0,	4.81696	3.80638
Chr1	2359606	2359905	AT1G07650_1	299,	0,	6.45333	10.354
Chr1	2381095	2381341	AT1G07700_1	246,	0,	9.37639	17.8347
Chr1	2385858	2386058	AT1G07705_1	200,	0,	12.9767	7.88173
Chr1	2400637	2400977	AT1G07745_1	216,30,	0,310,	7.88032	2.26743
Chr1	2404138	2404236	AT1G07750_1	98,	0,	12.4085	6.9494
Chr1	2408236	2408480	AT1G07770_1	244,	0,	6.53589	85.0623
Chr1	2410012	2410456	AT1G07780_1	444,	0,	5.13628	3.86283
Chr1	2413032	2413175	AT1G07790_1	143,	0,	2.20956	45.8279
Chr1	2420531	2420730	AT1G07810_1	199,	0,	7.99826	8.38804
Chr1	2423415	2423658	AT1G07830_1	243,	0,	4.94715	10.1682
Chr1	2425785	2426124	AT1G07840_1	77,173,	0,166,	3.02635	9.6648
Chr1	2426272	2426629	AT1G07840_2	34,216,	0,141,	8.59894	9.6648
Chr1	2439515	2439615	AT1G07890_1	100,	0,	5.85415	237.735
Chr1	2457076	2457223	AT1G07920_1	147,	0,	2.87549	94.9121
Chr1	2460467	2460668	AT1G07930_1	201,	0,	2.91162	145.398
Chr1	2462997	2463243	AT1G07940_1	246,	0,	7.89952	57.7817
Chr1	2465826	2465974	AT1G07950_1	148,	0,	2.57262	8.99975
Chr1	2468828	2469170	AT1G07960_1	342,	0,	11.2558	10.3069
Chr1	2474583	2474832	AT1G07980_2	249,	0,	1.90952	6.71863
Chr1	2481278	2481842	AT1G07990_1	19,133,47,	0,301,517,	2.12295	8.38907
Chr1	2482651	2483147	AT1G07990_2	496,	0,	10.8463	8.38907
Chr1	2483288	2483486	AT1G08000_1	198,	0,	2.3201	4.24521
Chr1	2485995	2486194	AT1G08010_1	199,	0,	2.55494	9.59225
Chr1	2489507	2489705	AT1G08030_1	198,	0,	13.1567	4.47444
Chr1	2493080	2493179	AT1G08030_2	99,	0,	2.48067	4.47444
Chr1	2495407	2495555	AT1G08040_1	148,	0,	9.47057	14.2318
Chr1	2502102	2502302	AT1G08060_2	200,	0,	1.95923	2.52505
Chr1	2505183	2505433	AT1G08060_3	250,	0,	2.55714	2.52505
Chr1	2537688	2537883	AT1G08110_1	195,	0,	11.0388	40.5277
Chr1	2539711	2539999	AT1G08125_1	48,148,	0,140,	5.91852	7.76237
Chr1	2542760	2542958	AT1G08130_1	198,	0,	10.6588	9.73445
Chr1	2547699	2547799	AT1G08130_2	100,	0,	1.62181	9.73445
Chr1	2560188	2560335	AT1G08160_1	147,	0,	1.57667	5.72309
Chr1	2564982	2565079	AT1G08180_1	97,	0,	2.21395	2.36659
Chr1	2567618	2567818	AT1G08190_1	200,	0,	3.76175	34.0316
Chr1	2573049	2573349	AT1G08190_2	300,	0,	11.3851	34.0316
Chr1	2573967	2574267	AT1G08200_1	300,	0,	7.8514	109.277
Chr1	2577081	2577230	AT1G08210_1	149,	0,	3.74791	5.32692
Chr1	2586170	2586371	AT1G08230_2	201,	0,	2.23028	2.2668
Chr1	2586569	2586720	AT1G08230_3	151,	0,	2.66647	2.2668
Chr1	2637665	2637859	AT1G08360_1	194,	0,	10.081	152.548
Chr1	2639812	2640009	AT1G08370_1	197,	0,	2.45918	9.97616
Chr1	2640205	2640516	AT1G08370_2	40,206,	0,105,	7.08891	9.97616
Chr1	2643086	2643235	AT1G08390_1	149,	0,	9.89297	2.05258
Chr1	2646291	2646440	AT1G08410_1	149,	0,	1.55959	5.21503
Chr1	2656574	2657070	AT1G08420_1	496,	0,	3.65707	16.9226
Chr1	2667946	2668524	AT1G08450_1	73,33,87,57,	0,188,341,521,	4.35104	48.5514
Chr1	2674423	2674622	AT1G08460_1	199,	0,	6.24914	5.9636
Chr1	2679483	2679581	AT1G08465_1	98,	0,	5.81944	10.9437
Chr1	2682155	2682401	AT1G08470_1	246,	0,	3.62284	12.1355
Chr1	2683876	2684024	AT1G08470_2	148,	0,	1.72384	12.1355
Chr1	2685401	2685602	AT1G08480_1	201,	0,	9.33036	36.1247
Chr1	2685707	2685955	AT1G08490_1	248,	0,	9.12054	23.3361
Chr1	2691161	2691659	AT1G08510_1	498,	0,	5.0817	42.0743
Chr1	2702868	2703113	AT1G08530_1	245,	0,	5.87843	8.62237
Chr1	2706509	2706760	AT1G08540_1	251,	0,	11.4692	60.9376
Chr1	2709043	2709491	AT1G08550_1	448,	0,	6.15395	37.8147
Chr1	2710217	2710316	AT1G08560_1	99,	0,	1.96119	9.27345
Chr1	2715088	2715537	AT1G08580_1	269,64,	0,385,	3.84847	22.7437
Chr1	2716246	2716390	AT1G08580_2	144,	0,	2.89752	22.7437
Chr1	2724564	2724815	AT1G08600_1	251,	0,	5.75244	3.32668
Chr1	2732915	2733163	AT1G08600_2	37,114,	0,134,	2.00533	3.32668
Chr1	2743331	2743681	AT1G08620_1	350,	0,	6.35193	4.47279
Chr1	2748460	2748661	AT1G08640_1	201,	0,	12.9939	43.914
Chr1	2752221	2752417	AT1G08650_1	196,	0,	2.24069	11.4379
Chr1	2756952	2757347	AT1G08660_1	395,	0,	3.96324	10.7169
Chr1	2759457	2759692	AT1G08660_2	28,121,	0,114,	1.84852	10.7169
Chr1	2768370	2768619	AT1G08680_1	249,	0,	11.404	8.23473
Chr1	2772704	2772850	AT1G08710_1	146,	0,	1.63983	3.12506
Chr1	2778863	2778962	AT1G08720_1	99,	0,	3.55126	4.21684
Chr1	2804266	2804514	AT1G08750_1	248,	0,	8.11468	5.17808
Chr1	2809825	2810115	AT1G08780_1	290,	0,	3.23342	13.1833
Chr1	2813856	2814204	AT1G08800_2	348,	0,	1.8659	2.03873
Chr1	2821552	2821851	AT1G08820_1	299,	0,	15.2549	8.10079
Chr1	2829120	2829218	AT1G08830_1	98,	0,	11.2672	205.27
Chr1	2840883	2841034	AT1G08845_1	151,	0,	6.38187	3.01959
Chr1	2851973	2852171	AT1G08890_1	198,	0,	8.16549	5.53394
Chr1	2855592	2855692	AT1G08900_1	100,	0,	6.90813	5.99795
Chr1	2860282	2860480	AT1G08910_1	198,	0,	3.36429	4.3049
Chr1	2860824	2861071	AT1G08910_2	247,	0,	4.76859	4.3049
Chr1	2877019	2877119	AT1G08930_1	100,	0,	8.75015	20.4165
Chr1	2877918	2878066	AT1G08940_1	148,	0,	3.88002	2.46722
Chr1	2879804	2880103	AT1G08960_1	299,	0,	2.13339	4.31067
Chr1	2882587	2882686	AT1G08970_1	99,	0,	2.53918	11.9543
Chr1	2883854	2883952	AT1G08970_2	98,	0,	7.15203	11.9543
Chr1	2884097	2884245	AT1G08970_3	148,	0,	12.3951	11.9543
Chr1	2899974	2900174	AT1G09020_1	200,	0,	9.83051	21.3219
Chr1	2904612	2904763	AT1G09020_2	151,	0,	2.24951	21.3219
Chr1	2921162	2921311	AT1G09060_1	149,	0,	5.98059	8.68255
Chr1	2936625	2936725	AT1G09100_1	100,	0,	10.1517	11.1712
Chr1	2939714	2939813	AT1G09130_1	99,	0,	13.3592	93.5236
Chr1	2942635	2942832	AT1G09140_1	197,	0,	18.671	15.453
Chr1	2948750	2949111	AT1G09150_1	23,221,	0,140,	11.4734	17.2738
Chr1	2952894	2953094	AT1G09160_1	200,	0,	6.64002	12.1565
Chr1	2966608	2966755	AT1G09190_2	147,	0,	1.59617	2.61633
Chr1	2973077	2973225	AT1G09210_1	148,	0,	8.41565	59.8043
Chr1	2981362	2981809	AT1G09230_2	36,82,32,	0,178,415,	2.49625	3.56911
Chr1	2994479	2994628	AT1G09270_1	149,	0,	2.91832	20.7264
Chr1	2997775	2998222	AT1G09270_2	447,	0,	9.79978	20.7264
Chr1	2998148	2998345	AT1G09280_1	197,	0,	8.22303	4.32102
Chr1	3001537	3001686	AT1G09290_1	149,	0,	11.239	5.2664
Chr1	3003563	3003713	AT1G09290_2	150,	0,	3.49195	5.2664
Chr1	3003594	3003745	AT1G09300_1	151,	0,	3.9399	2.83114
Chr1	3009107	3009206	AT1G09310_1	99,	0,	3.01675	520.358
Chr1	3011669	3011867	AT1G09320_2	198,	0,	2.2001	2.98049
Chr1	3012835	3012982	AT1G09330_1	147,	0,	7.08037	12.4419
Chr1	3018049	3018148	AT1G09340_1	99,	0,	5.50635	413.043
Chr1	3038080	3038268	AT1G09415_1	188,	0,	4.18797	16.0194
Chr1	3038511	3038662	AT1G09420_1	151,	0,	7.66713	7.95749
Chr1	3044997	3045343	AT1G09430_1	346,	0,	11.761	22.7843
Chr1	3055744	3055902	AT1G09470_2	18,79,	0,79,	1.40262	1.58954
Chr1	3056604	3056803	AT1G09470_3	55,43,	0,156,	2.27552	1.58954
Chr1	3065705	3065852	AT1G09490_1	147,	0,	5.32628	17.4516
Chr1	3079259	3079457	AT1G09530_1	198,	0,	6.34393	3.05294
Chr1	3095308	3095507	AT1G09570_1	199,	0,	8.84554	7.0842
Chr1	3107413	3107704	AT1G09590_1	291,	0,	3.99156	118.332
Chr1	3112926	3113076	AT1G09620_1	150,	0,	4.36553	31.5653
Chr1	3118253	3118403	AT1G09630_1	150,	0,	5.31238	13.438
Chr1	3122241	3122442	AT1G09640_1	201,	0,	5.89579	82.1934
Chr1	3124328	3124522	AT1G09645_1	194,	0,	6.13197	9.64966
Chr1	3127860	3128060	AT1G09660_1	200,	0,	11.8211	21.2185
Chr1	3136235	3136430	AT1G09690_1	195,	0,	5.33533	189.65
Chr1	3137794	3138381	AT1G09700_1	587,	0,	4.34554	4.77466
Chr1	3147736	3148185	AT1G09730_1	449,	0,	4.4667	6.01615
Chr1	3156083	3156230	AT1G09740_1	147,	0,	14.7034	5.05225
Chr1	3157599	3157846	AT1G09750_1	247,	0,	3.16011	139.989
Chr1	3157944	3158142	AT1G09750_2	198,	0,	2.09709	139.989
Chr1	3159223	3159422	AT1G09760_1	199,	0,	15.8096	21.6605
Chr1	3162746	3162896	AT1G09770_1	150,	0,	2.31406	24.7063
Chr1	3163745	3163846	AT1G09770_2	101,	0,	1.82267	24.7063
Chr1	3164577	3165316	AT1G09770_3	99,551,	0,188,	5.49297	24.7063
Chr1	3165415	3165566	AT1G09770_4	151,	0,	2.49117	24.7063
Chr1	3172144	3172240	AT1G09794_1	96,	0,	2.87237	3.025
Chr1	3173269	3173462	AT1G09794_2	193,	0,	8.25699	3.025
Chr1	3176665	3176861	AT1G09795_1	196,	0,	11.6981	78.5953
Chr1	3181025	3181427	AT1G09810_1	274,26,	0,376,	4.48273	3.6962
Chr1	3192715	3192962	AT1G09830_1	247,	0,	5.34237	17.8157
Chr1	3194747	3194945	AT1G09830_2	198,	0,	2.2938	17.8157
Chr1	3195867	3196528	AT1G09840_1	335,14,	0,647,	7.21737	10.5953
Chr1	3203857	3204101	AT1G09850_1	244,	0,	7.72231	17.8513
Chr1	3208417	3208615	AT1G09870_1	198,	0,	8.79493	8.15894
Chr1	3224732	3225129	AT1G09920_1	281,14,	0,383,	5.88346	17.6463
Chr1	3237054	3237299	AT1G09940_1	245,	0,	4.55755	8.10434
Chr1	3237445	3237544	AT1G09940_2	99,	0,	1.80713	8.10434
Chr1	3252297	3252498	AT1G09970_1	201,	0,	3.04665	16.2787
Chr1	3255132	3255382	AT1G09970_2	250,	0,	3.96817	16.2787
Chr1	3255531	3255632	AT1G09970_3	101,	0,	1.23285	16.2787
Chr1	3256287	3256633	AT1G09980_1	346,	0,	11.1366	5.90084
Chr1	3286798	3286996	AT1G10060_1	198,	0,	1.67687	5.45783
Chr1	3290359	3290656	AT1G10090_1	297,	0,	11.2359	9.59188
Chr1	3304087	3304186	AT1G10120_1	99,	0,	4.49042	6.44972
Chr1	3305233	3305381	AT1G10120_2	148,	0,	2.40443	6.44972
Chr1	3321920	3322169	AT1G10130_1	249,	0,	18.0611	8.98661
Chr1	3323094	3323243	AT1G10140_1	149,	0,	2.0267	1.03837
Chr1	3333653	3333904	AT1G10170_1	251,	0,	3.45792	9.36958
Chr1	3337051	3337252	AT1G10170_2	201,	0,	2.2904	9.36958
Chr1	3363530	3364024	AT1G10270_1	494,	0,	2.9095	4.88868
Chr1	3377067	3377414	AT1G10290_1	347,	0,	16.7263	28.1196
Chr1	3381595	3381795	AT1G10310_1	200,	0,	12.8287	16.6762
Chr1	3387844	3388376	AT1G10320_2	38,408,	0,124,	11.8783	3.34369
Chr1	3393386	3393584	AT1G10350_1	198,	0,	2.94761	6.42722
Chr1	3395598	3395745	AT1G10360_1	147,	0,	3.51946	41.6388
Chr1	3407104	3407602	AT1G10390_1	498,	0,	3.86068	17.1494
Chr1	3416728	3416879	AT1G10410_1	151,	0,	12.9211	7.62885
Chr1	3428526	3428772	AT1G10430_1	246,	0,	6.63058	15.7396
Chr1	3436245	3436346	AT1G10450_1	101,	0,	1.8613	3.1591
Chr1	3442487	3442587	AT1G10470_1	100,	0,	4.64925	47.5397
Chr1	3459872	3460172	AT1G10490_1	300,	0,	9.25204	7.28177
Chr1	3460049	3460199	AT1G10500_1	150,	0,	5.77214	41.2646
Chr1	3465535	3465686	AT1G10510_1	151,	0,	12.2134	25.1963
Chr1	3471191	3471439	AT1G10522_1	248,	0,	8.99165	26.1737
Chr1	3491307	3491507	AT1G10580_1	200,	0,	14.8096	17.9128
Chr1	3492936	3493236	AT1G10580_2	300,	0,	5.75872	17.9128
Chr1	3502135	3502235	AT1G10590_1	100,	0,	7.68271	62.2826
Chr1	3505185	3505526	AT1G10600_1	341,	0,	9.65048	7.47049
Chr1	3512885	3513180	AT1G10630_1	295,	0,	10.1465	28.0677
Chr1	3534889	3535088	AT1G10660_1	199,	0,	4.57552	11.2849
Chr1	3537978	3538223	AT1G10670_1	245,	0,	8.47167	67.1503
Chr1	3556251	3556495	AT1G10700_1	244,	0,	7.28821	9.16829
Chr1	3563380	3563479	AT1G10720_1	99,	0,	3.49373	7.76735
Chr1	3564555	3564703	AT1G10720_2	148,	0,	4.24374	7.76735
Chr1	3568247	3568446	AT1G10740_1	199,	0,	9.79076	8.81041
Chr1	3581078	3581229	AT1G10760_1	151,	0,	14.4433	78.3851
Chr1	3601007	3601254	AT1G10820_1	247,	0,	5.57839	8.29098
Chr1	3605611	3605761	AT1G10830_1	150,	0,	6.28955	16.2776
Chr1	3607280	3607480	AT1G10830_2	200,	0,	2.52523	16.2776
Chr1	3607776	3607922	AT1G10840_1	146,	0,	7.94441	41.0469
Chr1	3613088	3613289	AT1G10850_1	201,	0,	3.37477	7.41746
Chr1	3614362	3614613	AT1G10850_2	251,	0,	11.2096	7.41746
Chr1	3614607	3614799	AT1G10865_1	192,	0,	6.01774	8.39772
Chr1	3616708	3616858	AT1G10870_1	150,	0,	14.0537	5.62467
Chr1	3629229	3630609	AT1G10890_1	75,220,355,	0,615,1025,	6.3016	13.6292
Chr1	3643988	3644137	AT1G10910_1	149,	0,	16.7736	13.4352
Chr1	3647974	3648274	AT1G10930_1	300,	0,	4.38349	6.16905
Chr1	3655870	3656169	AT1G10940_1	299,	0,	10.3721	23.0593
Chr1	3659302	3660365	AT1G10950_1	109,41,	0,1022,	1.76764	45.4584
Chr1	3663618	3663917	AT1G10950_2	299,	0,	5.78376	45.4584
Chr1	3664470	3664566	AT1G10960_1	96,	0,	2.53995	369.924
Chr1	3678323	3678518	AT1G11020_1	195,	0,	4.47928	5.15283
Chr1	3683720	3683920	AT1G11050_2	200,	0,	2.57907	3.30222
Chr1	3725064	3725215	AT1G11130_1	151,	0,	2.04178	8.6705
Chr1	3727200	3727400	AT1G11130_2	200,	0,	11.5835	8.6705
Chr1	3748263	3748411	AT1G11180_1	148,	0,	5.04103	7.26454
Chr1	3755461	3755609	AT1G11200_1	148,	0,	8.05206	8.00147
Chr1	3766802	3767050	AT1G11240_1	248,	0,	5.31505	7.4892
Chr1	3767411	3768120	AT1G11240_2	109,106,33,	0,473,676,	2.46078	7.4892
Chr1	3780077	3780227	AT1G11260_1	150,	0,	1.9354	23.4881
Chr1	3787416	3787565	AT1G11280_1	149,	0,	4.57886	5.12065
Chr1	3800700	3800851	AT1G11303_1	151,	0,	10.1864	2.29858
Chr1	3800745	3800992	AT1G11310_1	247,	0,	2.8183	43.7544
Chr1	3801090	3801239	AT1G11310_2	149,	0,	1.77408	43.7544
Chr1	3813361	3813560	AT1G11330_1	199,	0,	6.55737	11.0307
Chr1	3817572	3817771	AT1G11350_1	199,	0,	5.29218	8.93079
Chr1	3821496	3821693	AT1G11360_1	197,	0,	8.39154	10.5712
Chr1	3822060	3822257	AT1G11360_2	197,	0,	1.57188	10.5712
Chr1	3822354	3822452	AT1G11360_3	98,	0,	1.45126	10.5712
Chr1	3832661	3832959	AT1G11380_1	298,	0,	1.80645	5.61777
Chr1	3833916	3834264	AT1G11380_2	348,	0,	6.3858	5.61777
Chr1	3837378	3837527	AT1G11390_2	149,	0,	1.63138	5.02382
Chr1	3838133	3838826	AT1G11400_1	29,119,	0,574,	2.43425	4.42234
Chr1	3839853	3840245	AT1G11400_2	392,	0,	7.49052	4.42234
Chr1	3848828	3849076	AT1G11430_1	248,	0,	7.63816	103.232
Chr1	3850041	3850240	AT1G11440_1	199,	0,	8.0696	7.5961
Chr1	3863794	3863981	AT1G11475_1	187,	0,	16.723	27.4085
Chr1	3864091	3864437	AT1G11480_1	346,	0,	9.82409	12.2116
Chr1	3866802	3866951	AT1G11480_2	149,	0,	2.43159	12.2116
Chr1	3875251	3875391	AT1G11530_1	140,	0,	4.97775	21.4903
Chr1	3895319	3895634	AT1G11591_1	192,4,	0,311,	6.12338	3.30619
Chr1	3913584	3913732	AT1G11630_2	148,	0,	1.81807	3.30646
Chr1	3917893	3918094	AT1G11650_1	201,	0,	16.2658	112.224
Chr1	3924316	3924466	AT1G11660_1	150,	0,	11.7041	8.12441
Chr1	3952695	3952846	AT1G11720_1	151,	0,	1.92358	11.1605
Chr1	3953194	3953345	AT1G11720_2	151,	0,	2.75621	11.1605
Chr1	3956793	3956994	AT1G11720_3	201,	0,	10.3537	11.1605
Chr1	3969528	3969827	AT1G11750_1	299,	0,	5.56406	68.3056
Chr1	3969728	3969923	AT1G11755_1	195,	0,	6.96021	5.27842
Chr1	3977429	3977578	AT1G11780_1	149,	0,	9.26724	5.08077
Chr1	3985019	3985119	AT1G11790_1	100,	0,	10.205	17.488
Chr1	3997526	3997770	AT1G11840_1	244,	0,	6.35043	103.382
Chr1	3999445	3999542	AT1G11850_1	97,	0,	1.80184	58.6571
Chr1	4003248	4003349	AT1G11860_1	101,	0,	3.99264	728.856
Chr1	4003956	4004056	AT1G11870_1	100,	0,	1.67153	13.6263
Chr1	4006515	4006716	AT1G11870_2	201,	0,	9.16391	13.6263
Chr1	4012854	4013054	AT1G11890_1	200,	0,	12.8925	24.2896
Chr1	4016861	4017112	AT1G11910_1	251,	0,	5.38686	97.5105
Chr1	4030264	4030509	AT1G11930_1	245,	0,	6.41552	32.2218
Chr1	4039713	4039912	AT1G11960_1	199,	0,	6.06135	4.11647
Chr1	4041691	4042051	AT1G11960_2	56,81,61,	0,135,299,	1.95455	4.11647
Chr1	4050042	4050190	AT1G12000_1	148,	0,	8.96285	30.8085
Chr1	4075864	4076108	AT1G12050_1	5,145,	0,99,	10.2136	17.0591
Chr1	4084591	4084889	AT1G12080_1	298,	0,	5.51877	61.9838
Chr1	4109307	4109454	AT1G12110_1	147,	0,	5.10401	45.1122
Chr1	4114870	4115118	AT1G12120_1	248,	0,	3.1045	18.2639
Chr1	4123321	4123471	AT1G12140_1	150,	0,	2.8491	16.4339
Chr1	4150662	4150958	AT1G12230_1	296,	0,	10.9553	40.7581
Chr1	4158898	4158997	AT1G12244_1	99,	0,	9.28585	8.21671
Chr1	4161207	4161407	AT1G12250_1	200,	0,	9.4755	50.2995
Chr1	4174580	4174730	AT1G12270_1	150,	0,	11.7012	16.4669
Chr1	4194718	4195524	AT1G12330_1	29,420,	0,386,	2.94098	19.3859
Chr1	4196549	4196649	AT1G12330_2	100,	0,	2.1576	19.3859
Chr1	4200556	4200800	AT1G12350_1	244,	0,	8.94528	15.0663
Chr1	4206092	4206339	AT1G12360_1	247,	0,	16.6005	9.94575
Chr1	4224915	4225061	AT1G12410_1	146,	0,	6.96222	104.696
Chr1	4233864	4234261	AT1G12430_1	397,	0,	6.82739	8.71129
Chr1	4236383	4236694	AT1G12430_2	165,34,	0,277,	1.85981	8.71129
Chr1	4241615	4241812	AT1G12440_1	197,	0,	2.34073	21.816
Chr1	4257143	4257392	AT1G12470_1	249,	0,	10.9868	8.11664
Chr1	4257316	4257416	AT1G12480_1	100,	0,	14.4212	2.61872
Chr1	4263346	4263594	AT1G12500_1	248,	0,	3.41717	21.8386
Chr1	4264662	4264860	AT1G12500_2	198,	0,	2.07769	21.8386
Chr1	4267171	4267516	AT1G12520_1	345,	0,	4.11919	62.0845
Chr1	4269032	4269318	AT1G12530_1	286,	0,	8.4276	9.60177
Chr1	4274728	4274928	AT1G12550_1	200,	0,	1.25606	4.69059
Chr1	4275584	4275684	AT1G12550_2	100,	0,	1.47289	4.69059
Chr1	4285431	4285827	AT1G12580_1	396,	0,	5.83295	7.63721
Chr1	4303477	4303578	AT1G12640_1	101,	0,	5.12158	10.8235
Chr1	4307072	4307908	AT1G12650_1	49,121,47,331,	0,141,373,505,	5.61721	6.63878
Chr1	4319974	4320123	AT1G12680_1	149,	0,	6.74085	6.32106
Chr1	4326787	4326887	AT1G12710_1	100,	0,	4.3921	7.19705
Chr1	4337357	4337807	AT1G12730_1	16,285,	0,165,	12.4776	3.03011
Chr1	4345042	4345192	AT1G12750_1	150,	0,	7.41431	4.20308
Chr1	4346664	4346765	AT1G12750_2	101,	0,	1.71211	4.20308
Chr1	4353448	4353598	AT1G12770_1	150,	0,	5.57786	20.4461
Chr1	4356024	4356306	AT1G12780_1	184,15,	0,267,	2.65511	11.0904
Chr1	4368532	4368774	AT1G12810_1	242,	0,	7.08073	13.8677
Chr1	4368809	4369058	AT1G12820_1	249,	0,	2.20484	17.5654
Chr1	4374597	4374844	AT1G12840_1	247,	0,	7.06216	53.209
Chr1	4378218	4378465	AT1G12840_2	247,	0,	15.0945	53.209
Chr1	4379792	4379892	AT1G12850_1	100,	0,	3.58752	16.2904
Chr1	4390725	4391100	AT1G12880_1	56,237,	0,138,	3.83702	2.63673
Chr1	4398370	4398766	AT1G12930_1	396,	0,	11.5777	4.85822
Chr1	4405138	4405323	AT1G12930_2	67,32,	0,153,	1.5249	4.85822
Chr1	4405470	4405570	AT1G12930_3	100,	0,	2.57695	4.85822
Chr1	4424085	4424185	AT1G12970_1	100,	0,	2.3068	3.16071
Chr1	4435802	4435952	AT1G12990_1	150,	0,	4.24161	12.9911
Chr1	4436200	4436501	AT1G13000_1	301,	0,	9.51956	4.93359
Chr1	4445755	4446698	AT1G13030_2	51,78,67,174,120,	0,170,402,573,823,	2.74433	3.29683
Chr1	4454606	4454802	AT1G13060_1	196,	0,	12.5783	42.1739
Chr1	4469242	4469490	AT1G13120_1	248,	0,	10.1937	4.82648
Chr1	4471363	4471611	AT1G13120_2	248,	0,	3.37171	4.82648
Chr1	4472090	4472339	AT1G13120_3	23,126,	0,123,	2.19612	4.82648
Chr1	4487472	4487669	AT1G13160_1	197,	0,	2.62266	7.55932
Chr1	4488232	4488528	AT1G13160_2	296,	0,	3.9689	7.55932
Chr1	4488682	4489132	AT1G13170_1	332,18,	0,432,	3.55939	7.80334
Chr1	4491867	4492018	AT1G13170_2	151,	0,	1.58496	7.80334
Chr1	4498222	4498371	AT1G13180_1	149,	0,	14.5971	3.72913
Chr1	4500544	4500741	AT1G13190_1	197,	0,	4.60919	11.7232
Chr1	4501034	4501182	AT1G13190_2	148,	0,	1.90787	11.7232
Chr1	4501280	4501428	AT1G13190_3	148,	0,	2.21132	11.7232
Chr1	4517003	4517343	AT1G13220_1	206,45,	0,295,	3.40305	2.97806
Chr1	4518491	4518591	AT1G13220_3	100,	0,	2.82907	2.97806
Chr1	4529576	4529775	AT1G13250_1	199,	0,	2.12797	13.5381
Chr1	4529923	4530023	AT1G13250_2	100,	0,	1.81334	13.5381
Chr1	4547074	4547274	AT1G13270_1	200,	0,	12.2536	55.8298
Chr1	4563526	4563776	AT1G13320_1	250,	0,	13.6907	19.9858
Chr1	4568789	4569156	AT1G13330_1	7,71,117,	0,93,250,	2.81822	1.17482
Chr1	4572402	4572749	AT1G13350_1	347,	0,	7.56765	8.63916
Chr1	4575199	4575299	AT1G13350_2	100,	0,	2.53452	8.63916
Chr1	4575499	4575974	AT1G13350_3	336,60,	0,415,	8.8324	8.63916
Chr1	4589140	4589238	AT1G13380_1	98,	0,	4.2305	15.9836
Chr1	4592500	4592847	AT1G13390_1	347,	0,	2.70831	7.19416
Chr1	4612780	4612981	AT1G13450_1	201,	0,	5.25058	4.77963
Chr1	4614552	4614653	AT1G13450_2	101,	0,	1.83254	4.77963
Chr1	4614902	4615053	AT1G13450_3	151,	0,	1.47571	4.77963
Chr1	4615864	4615964	AT1G13460_1	100,	0,	5.85152	4.4356
Chr1	4618104	4618252	AT1G13460_2	148,	0,	4.06444	4.4356
Chr1	4620390	4620682	AT1G13470_1	292,	0,	5.20414	27.3963
Chr1	4638616	4638815	AT1G13560_1	199,	0,	14.4285	23.4905
Chr1	4642416	4642612	AT1G13570_1	196,	0,	9.02315	2.55643
Chr1	4680485	4680829	AT1G13650_1	344,	0,	2.35421	6.80334
Chr1	4694026	4694410	AT1G13690_1	384,	0,	4.76065	14.1421
Chr1	4711122	4711220	AT1G13730_1	98,	0,	1.93595	11.1343
Chr1	4712182	4712525	AT1G13730_2	343,	0,	4.94439	11.1343
Chr1	4714323	4714423	AT1G13740_1	100,	0,	2.55252	4.45066
Chr1	4714763	4714962	AT1G13740_2	199,	0,	3.17364	4.45066
Chr1	4715442	4715591	AT1G13750_1	149,	0,	5.33106	5.56843
Chr1	4724324	4724471	AT1G13770_1	147,	0,	4.9882	4.39569
Chr1	4728900	4729383	AT1G13790_1	29,69,198,	0,114,285,	2.64058	1.77725
Chr1	4729840	4730376	AT1G13790_2	61,384,	0,152,	4.18645	1.77725
Chr1	4737520	4737861	AT1G13820_1	341,	0,	10.5052	31.6689
Chr1	4743302	4743501	AT1G13860_1	199,	0,	5.13979	5.57436
Chr1	4747329	4747474	AT1G13870_1	145,	0,	12.0485	8.38542
Chr1	4774637	4774787	AT1G13950_1	150,	0,	8.14428	5.38411
Chr1	4777824	4777925	AT1G13960_1	101,	0,	2.08921	4.39679
Chr1	4778222	4778504	AT1G13960_2	194,6,	0,276,	2.65486	4.39679
Chr1	4794354	4794505	AT1G13980_1	151,	0,	4.90678	6.43796
Chr1	4796453	4796551	AT1G13990_1	98,	0,	20.2622	11.1018
Chr1	4799941	4800283	AT1G14000_1	342,	0,	8.02718	25.0504
Chr1	4800216	4800410	AT1G14010_1	194,	0,	14.1939	19.0755
Chr1	4804306	4804406	AT1G14020_1	100,	0,	2.08689	7.60876
Chr1	4805078	4805375	AT1G14020_2	297,	0,	10.3821	7.60876
Chr1	4805354	4805502	AT1G14030_1	148,	0,	8.87448	20.334
Chr1	4817124	4817421	AT1G14060_1	297,	0,	3.71717	6.30019
Chr1	4817568	4817668	AT1G14060_2	100,	0,	1.92385	6.30019
Chr1	4843281	4843626	AT1G14170_1	217,30,	0,315,	3.09424	5.61514
Chr1	4854513	4854852	AT1G14200_1	339,	0,	1.97197	4.21071
Chr1	4856824	4856968	AT1G14210_1	144,	0,	2.24097	7.39483
Chr1	4857062	4857283	AT1G14210_2	120,23,	0,198,	2.40285	7.39483
Chr1	4863894	4863994	AT1G14230_1	100,	0,	8.73359	6.33281
Chr1	4871243	4871439	AT1G14250_1	196,	0,	5.72604	6.92137
Chr1	4874923	4875072	AT1G14270_1	149,	0,	14.2541	29.9877
Chr1	4877700	4877798	AT1G14280_1	98,	0,	2.6365	6.38634
Chr1	4880078	4880327	AT1G14290_1	249,	0,	8.6207	6.64556
Chr1	4886491	4886744	AT1G14310_1	10,139,	0,114,	7.32169	8.92421
Chr1	4889411	4889558	AT1G14320_1	147,	0,	5.52561	230.866
Chr1	4898744	4898938	AT1G14340_1	194,	0,	14.6778	8.52581
Chr1	4899236	4899333	AT1G14345_1	97,	0,	4.64161	112.654
Chr1	4908269	4908822	AT1G14350_1	250,47,3,	0,337,550,	5.26136	6.51592
Chr1	4911237	4911335	AT1G14360_1	98,	0,	8.62229	13.7547
Chr1	4918058	4918257	AT1G14380_1	199,	0,	9.32081	7.18613
Chr1	4927082	4927331	AT1G14400_1	249,	0,	11.5248	39.9293
Chr1	4929169	4929319	AT1G14410_1	150,	0,	4.50437	23.0645
Chr1	4939148	4939297	AT1G14440_1	149,	0,	1.9704	5.55359
Chr1	4939445	4939594	AT1G14440_2	149,	0,	1.63348	5.55359
Chr1	4946284	4947343	AT1G14450_1	204,31,	0,1028,	7.70614	5.97306
Chr1	4951451	4951601	AT1G14460_2	150,	0,	3.24035	2.95973
Chr1	4961892	4962342	AT1G14510_1	450,	0,	2.15079	14.2531
Chr1	4971197	4971441	AT1G14530_1	244,	0,	11.5396	3.08021
Chr1	4983067	4983218	AT1G14560_1	151,	0,	6.31938	4.3772
Chr1	4990108	4990208	AT1G14580_1	100,	0,	2.28311	4.71884
Chr1	4991860	4992010	AT1G14580_2	150,	0,	1.98336	4.71884
Chr1	4992456	4992556	AT1G14580_3	100,	0,	2.79236	4.71884
Chr1	4998866	4999016	AT1G14590_1	150,	0,	7.86381	6.87463
Chr1	5008251	5008851	AT1G14610_1	425,73,	0,527,	4.42324	22.59
Chr1	5013604	5014215	AT1G14610_2	51,49,	0,562,	2.91485	22.59
Chr1	5014772	5014970	AT1G14620_1	198,	0,	15.1007	9.66795
Chr1	5028866	5029315	AT1G14650_1	449,	0,	3.16535	13.204
Chr1	5030496	5030746	AT1G14650_2	250,	0,	8.34202	13.204
Chr1	5048315	5048462	AT1G14687_1	147,	0,	3.93091	2.01531
Chr1	5051803	5052050	AT1G14690_1	247,	0,	6.63795	7.40782
Chr1	5052245	5052582	AT1G14690_2	183,65,	0,272,	2.54744	7.40782
Chr1	5060891	5061090	AT1G14700_1	199,	0,	3.84027	12.8134
Chr1	5061942	5062341	AT1G14710_1	399,	0,	6.22943	20.7171
Chr1	5062439	5062589	AT1G14710_2	150,	0,	2.66716	20.7171
Chr1	5063841	5064209	AT1G14710_3	89,62,	0,306,	3.29412	20.7171
Chr1	5065053	5065154	AT1G14710_4	101,	0,	2.37271	20.7171
Chr1	5066723	5066823	AT1G14720_1	100,	0,	7.42213	26.1835
Chr1	5075376	5075822	AT1G14740_1	446,	0,	4.26463	15.1223
Chr1	5102572	5102721	AT1G14810_1	149,	0,	11.8448	55.726
Chr1	5104502	5104652	AT1G14810_2	150,	0,	2.16269	55.726
Chr1	5105172	5105322	AT1G14820_1	150,	0,	11.6598	8.77376
Chr1	5107513	5107759	AT1G14830_1	246,	0,	9.18374	24.6089
Chr1	5112149	5112399	AT1G14840_1	250,	0,	5.00646	8.03995
Chr1	5112635	5112831	AT1G14840_2	94,7,	0,189,	1.94873	8.03995
Chr1	5113919	5114125	AT1G14840_3	99,1,	0,205,	1.44097	8.03995
Chr1	5116672	5116972	AT1G14850_1	300,	0,	10.8957	6.21244
Chr1	5139809	5139958	AT1G14910_1	149,	0,	6.71668	13.3122
Chr1	5165636	5165932	AT1G14980_1	296,	0,	4.80259	51.6721
Chr1	5167156	5167352	AT1G14990_1	196,	0,	12.0202	7.35835
Chr1	5168657	5168804	AT1G15000_1	147,	0,	2.13064	13.3403
Chr1	5169725	5169872	AT1G15000_2	147,	0,	1.75349	13.3403
Chr1	5179852	5180000	AT1G15030_1	148,	0,	9.24871	12.2956
Chr1	5183631	5183927	AT1G15060_1	296,	0,	6.02765	7.85586
Chr1	5186711	5186909	AT1G15060_2	198,	0,	2.2451	7.85586
Chr1	5203845	5204145	AT1G15120_1	300,	0,	13.9311	55.6683
Chr1	5204791	5204992	AT1G15125_1	201,	0,	2.91424	3.80493
Chr1	5205814	5205914	AT1G15125_2	100,	0,	2.05749	3.80493
Chr1	5206051	5206251	AT1G15130_1	200,	0,	9.98256	14.934
Chr1	5206349	5206500	AT1G15130_2	151,	0,	2.5309	14.934
Chr1	5210279	5210479	AT1G15140_1	200,	0,	9.35776	97.5654
Chr1	5211951	5212151	AT1G15140_2	200,	0,	3.08041	97.5654
Chr1	5226529	5226679	AT1G15180_1	150,	0,	5.81623	9.17681
Chr1	5228397	5229019	AT1G15200_1	484,53,	0,569,	7.33537	22.4276
Chr1	5242716	5242965	AT1G15230_1	249,	0,	5.0428	11.8738
Chr1	5245433	5245534	AT1G15240_1	101,	0,	2.0343	5.14206
Chr1	5248542	5248693	AT1G15240_2	151,	0,	11.3305	5.14206
Chr1	5248712	5248812	AT1G15250_1	100,	0,	2.92502	14.1441
Chr1	5249950	5250095	AT1G15260_1	145,	0,	1.76406	28.4669
Chr1	5250697	5250841	AT1G15270_1	144,	0,	8.95174	168.103
Chr1	5252661	5253363	AT1G15280_1	274,76,	0,626,	4.13966	16.7555
Chr1	5256463	5256713	AT1G15280_2	250,	0,	11.4814	16.7555
Chr1	5257118	5257518	AT1G15290_1	400,	0,	4.15777	19.0886
Chr1	5264714	5264815	AT1G15290_2	101,	0,	2.06772	19.0886
Chr1	5275763	5276703	AT1G15340_1	940,	0,	7.26258	46.0069
Chr1	5278268	5278415	AT1G15350_1	147,	0,	6.27502	3.909
Chr1	5288395	5288542	AT1G15370_1	147,	0,	9.86725	18.6431
Chr1	5295633	5295733	AT1G15390_1	100,	0,	8.46936	19.8481
Chr1	5300632	5300878	AT1G15410_1	246,	0,	6.56616	4.12391
Chr1	5301661	5301954	AT1G15420_1	293,	0,	5.56895	9.01096
Chr1	5306076	5306275	AT1G15440_1	199,	0,	6.77138	6.79323
Chr1	5308513	5308713	AT1G15440_2	200,	0,	3.01767	6.79323
Chr1	5317644	5317842	AT1G15470_1	198,	0,	5.9426	9.85348
Chr1	5320664	5320863	AT1G15490_1	199,	0,	8.3089	3.30605
Chr1	5328626	5328825	AT1G15500_1	199,	0,	4.31005	56.1899
Chr1	5340108	5340306	AT1G15530_1	198,	0,	5.15892	6.42693
Chr1	5341487	5341931	AT1G15530_2	444,	0,	2.10438	6.42693
Chr1	5345948	5346097	AT1G15550_1	149,	0,	1.79044	2.19707
Chr1	5383546	5383954	AT1G15660_1	65,70,15,	0,155,393,	2.8118	5.66396
Chr1	5384444	5384595	AT1G15660_2	151,	0,	4.12245	5.66396
Chr1	5402282	5402383	AT1G15690_1	101,	0,	2.51933	446.304
Chr1	5404426	5404723	AT1G15710_1	297,	0,	2.27244	10.8243
Chr1	5404821	5404971	AT1G15710_2	150,	0,	1.90293	10.8243
Chr1	5407388	5407486	AT1G15720_1	98,	0,	30.9857	1.10685
Chr1	5407450	5407649	AT1G15730_1	199,	0,	9.2825	19.9469
Chr1	5414469	5414869	AT1G15740_1	400,	0,	13.7275	9.20969
Chr1	5414866	5415116	AT1G15750_1	250,	0,	6.92605	28.7329
Chr1	5444515	5444615	AT1G15810_1	100,	0,	2.12147	11.4073
Chr1	5445009	5445258	AT1G15810_2	249,	0,	2.75404	11.4073
Chr1	5446267	5446465	AT1G15810_3	198,	0,	4.97149	11.4073
Chr1	5456726	5456973	AT1G15860_1	247,	0,	7.25025	16.9016
Chr1	5458542	5458957	AT1G15880_1	289,4,	0,411,	8.46111	8.50114
Chr1	5467309	5468126	AT1G15910_1	8,288,54,	0,121,763,	3.73798	7.89861
Chr1	5468274	5469130	AT1G15910_2	11,638,	0,218,	5.02792	7.89861
Chr1	5469603	5469704	AT1G15920_1	101,	0,	1.94118	4.25743
Chr1	5472753	5472901	AT1G15930_1	148,	0,	8.82001	103.057
Chr1	5477307	5478255	AT1G15940_1	948,	0,	5.10177	4.28823
Chr1	5481837	5482131	AT1G15950_1	294,	0,	4.37384	15.6032
Chr1	5481861	5482208	AT1G15960_1	347,	0,	4.82495	1.0877
Chr1	5486370	5486617	AT1G15970_1	247,	0,	9.84528	8.39521
Chr1	5491117	5491265	AT1G15980_1	148,	0,	4.55282	145.99
Chr1	5495125	5495359	AT1G16000_1	234,	0,	6.36536	20.983
Chr1	5495422	5495522	AT1G16010_1	100,	0,	7.24387	14.1148
Chr1	5501061	5501309	AT1G16020_1	248,	0,	16.3619	8.78512
Chr1	5506372	5506618	AT1G16040_1	246,	0,	6.79893	3.41289
Chr1	5515778	5515928	AT1G16080_1	150,	0,	6.95853	122.781
Chr1	5538814	5538964	AT1G16170_1	150,	0,	3.24173	6.82176
Chr1	5542601	5542802	AT1G16180_1	201,	0,	4.92136	38.2843
Chr1	5545854	5546053	AT1G16190_1	199,	0,	10.7523	9.25277
Chr1	5546147	5546342	AT1G16210_1	195,	0,	10.7202	28.6169
Chr1	5547169	5547364	AT1G16210_2	195,	0,	2.02042	28.6169
Chr1	5555089	5555189	AT1G16240_1	100,	0,	12.3977	19.8368
Chr1	5564982	5565131	AT1G16270_1	149,	0,	2.13494	4.26742
Chr1	5568134	5568855	AT1G16280_1	500,41,	0,680,	4.79082	3.58045
Chr1	5581015	5581114	AT1G16320_1	99,	0,	1.89222	32.2699
Chr1	5587869	5587969	AT1G16340_1	100,	0,	5.44404	9.40095
Chr1	5591612	5591811	AT1G16350_1	199,	0,	2.89997	20.8011
Chr1	5592899	5592999	AT1G16350_2	100,	0,	4.97085	20.8011
Chr1	5608879	5609029	AT1G16410_1	150,	0,	1.76795	41.2399
Chr1	5615329	5615471	AT1G16430_1	142,	0,	2.60244	5.12612
Chr1	5619693	5619892	AT1G16460_1	199,	0,	14.0384	26.1676
Chr1	5625290	5625585	AT1G16470_1	3,195,	0,100,	4.6571	33.9801
Chr1	5645055	5645201	AT1G16510_1	146,	0,	1.69889	1.97458
Chr1	5650922	5651118	AT1G16520_1	196,	0,	5.28244	12.6326
Chr1	5670364	5670708	AT1G16560_1	344,	0,	5.58517	19.3429
Chr1	5670625	5670774	AT1G16570_1	149,	0,	19.332	4.84905
Chr1	5674996	5675094	AT1G16590_1	98,	0,	3.89994	3.31178
Chr1	5675691	5675988	AT1G16610_1	297,	0,	16.6251	18.1781
Chr1	5683763	5683864	AT1G16630_2	101,	0,	2.16641	2.16248
Chr1	5705542	5705842	AT1G16680_1	300,	0,	6.6857	5.9129
Chr1	5711656	5711947	AT1G16700_1	291,	0,	13.0595	29.6157
Chr1	5726178	5726428	AT1G16720_1	250,	0,	6.65659	49.2785
Chr1	5727720	5727871	AT1G16740_1	151,	0,	4.75238	22.3715
Chr1	5728915	5729065	AT1G16740_2	150,	0,	7.36821	22.3715
Chr1	5729105	5729255	AT1G16750_1	150,	0,	4.57372	5.60706
Chr1	5756199	5756846	AT1G16810_1	98,439,	0,208,	4.95476	38.3239
Chr1	5762792	5762942	AT1G16840_1	150,	0,	1.66302	17.4954
Chr1	5763935	5764035	AT1G16840_2	100,	0,	1.86765	17.4954
Chr1	5765054	5765204	AT1G16850_1	150,	0,	1.32914	7.91966
Chr1	5767397	5767594	AT1G16860_1	197,	0,	4.26615	21.9759
Chr1	5770012	5770111	AT1G16860_2	99,	0,	1.88017	21.9759
Chr1	5770208	5770455	AT1G16860_3	247,	0,	7.69217	21.9759
Chr1	5770781	5770981	AT1G16870_1	200,	0,	3.63836	12.2265
Chr1	5776160	5776259	AT1G16880_1	99,	0,	5.31532	295.408
Chr1	5776225	5776566	AT1G16890_1	341,	0,	10.6707	37.4589
Chr1	5779107	5779307	AT1G16900_1	200,	0,	15.1924	6.67235
Chr1	5786605	5786752	AT1G16916_1	147,	0,	4.0404	4.72845
Chr1	5787035	5787134	AT1G16916_2	99,	0,	1.70494	4.72845
Chr1	5787389	5787535	AT1G16920_1	146,	0,	5.54842	20.8257
Chr1	5831133	5831283	AT1G17050_1	150,	0,	8.28453	13.3277
Chr1	5837938	5838687	AT1G17070_1	749,	0,	4.2443	4.83783
Chr1	5838786	5838886	AT1G17070_2	100,	0,	2.17054	4.83783
Chr1	5840364	5840461	AT1G17080_1	97,	0,	6.96633	19.8966
Chr1	5842264	5842362	AT1G17090_1	98,	0,	1.19747	3.05983
Chr1	5845723	5846219	AT1G17110_1	496,	0,	9.57846	6.75696
Chr1	5855181	5855962	AT1G17130_1	91,66,51,85,	0,233,549,696,	2.45509	15.6002
Chr1	5856165	5856600	AT1G17130_2	8,334,	0,101,	3.88934	15.6002
Chr1	5856721	5856872	AT1G17140_1	151,	0,	2.8644	20.0207
Chr1	5856971	5857470	AT1G17140_2	499,	0,	2.84518	20.0207
Chr1	5860175	5860324	AT1G17145_1	149,	0,	7.3978	4.55192
Chr1	5880145	5880546	AT1G17210_1	401,	0,	9.71143	12.5181
Chr1	5890250	5890350	AT1G17220_1	100,	0,	6.70146	127.127
Chr1	5916881	5917130	AT1G17280_1	249,	0,	8.7853	8.02732
Chr1	5922826	5922976	AT1G17290_1	150,	0,	2.39602	42.443
Chr1	5926102	5926350	AT1G17290_2	248,	0,	4.87837	42.443
Chr1	5931400	5931728	AT1G17330_1	29,220,	0,108,	4.24179	7.55592
Chr1	5938418	5938718	AT1G17340_1	300,	0,	7.50628	4.62109
Chr1	5944215	5944415	AT1G17350_1	200,	0,	8.8277	2.82382
Chr1	5949674	5949775	AT1G17360_1	101,	0,	1.7552	5.17209
Chr1	5950171	5950271	AT1G17360_2	100,	0,	1.12429	5.17209
Chr1	5950519	5950620	AT1G17360_3	101,	0,	1.6791	5.17209
Chr1	5951361	5951511	AT1G17360_4	150,	0,	8.03141	5.17209
Chr1	5951640	5951838	AT1G17370_1	198,	0,	6.1225	26.0263
Chr1	5981221	5981372	AT1G17420_1	151,	0,	2.63878	6.3929
Chr1	5982773	5982870	AT1G17430_1	97,	0,	2.25869	8.37859
Chr1	5984033	5984383	AT1G17440_1	350,	0,	6.43903	14.0258
Chr1	5985493	5985794	AT1G17440_2	301,	0,	2.76489	14.0258
Chr1	5987134	5987684	AT1G17440_3	550,	0,	3.44256	14.0258
Chr1	5998310	5998503	AT1G17455_1	193,	0,	3.30157	5.24866
Chr1	6008628	6009036	AT1G17490_1	71,74,	0,334,	2.41867	13.62
Chr1	6009179	6009276	AT1G17490_2	97,	0,	1.97502	13.62
Chr1	6023103	6023503	AT1G17500_1	400,	0,	4.45755	3.32915
Chr1	6024732	6025322	AT1G17520_1	258,230,	0,360,	5.34688	5.17241
Chr1	6027175	6027322	AT1G17520_2	147,	0,	1.99876	5.17241
Chr1	6036849	6037249	AT1G17550_1	400,	0,	6.21851	16.4463
Chr1	6037554	6037705	AT1G17560_1	151,	0,	4.97353	8.65571
Chr1	6049285	6049535	AT1G17580_1	250,	0,	11.899	5.02299
Chr1	6069521	6069670	AT1G17650_1	149,	0,	4.14329	30.1051
Chr1	6072300	6072400	AT1G17665_1	100,	0,	7.78791	10.5752
Chr1	6074079	6074179	AT1G17665_2	100,	0,	2.7346	10.5752
Chr1	6074277	6074426	AT1G17665_3	149,	0,	3.25893	10.5752
Chr1	6076419	6076620	AT1G17680_1	201,	0,	2.19976	4.60866
Chr1	6080411	6080655	AT1G17680_2	37,114,	0,130,	2.16973	4.60866
Chr1	6082821	6083139	AT1G17690_1	131,19,	0,299,	7.834	4.98668
Chr1	6087154	6087826	AT1G17690_2	99,125,26,	0,263,646,	3.16556	4.98668
Chr1	6093384	6094084	AT1G17720_1	700,	0,	3.98719	21.9747
Chr1	6100103	6100299	AT1G17730_1	196,	0,	12.9223	14.0611
Chr1	6110155	6110576	AT1G17760_1	225,22,	0,399,	3.85974	4.65338
Chr1	6125042	6125191	AT1G17780_1	149,	0,	3.54223	4.13483
Chr1	6131585	6131980	AT1G17820_1	395,	0,	5.24431	4.70977
Chr1	6145977	6146225	AT1G17840_1	248,	0,	8.24744	26.1899
Chr1	6145974	6146269	AT1G17850_1	295,	0,	8.06532	6.27149
Chr1	6152477	6152620	AT1G17880_1	143,	0,	4.51163	129.825
Chr1	6184915	6185165	AT1G17970_1	250,	0,	2.25731	5.6575
Chr1	6185363	6185464	AT1G17970_2	101,	0,	2.66049	5.6575
Chr1	6187149	6187300	AT1G17970_3	151,	0,	3.93538	5.6575
Chr1	6187562	6187711	AT1G17980_1	149,	0,	4.98542	7.03852
Chr1	6191313	6191610	AT1G17980_2	297,	0,	2.09477	7.03852
Chr1	6211930	6212129	AT1G18060_1	199,	0,	14.2204	52.0699
Chr1	6213799	6214049	AT1G18070_1	250,	0,	13.6098	40.0678
Chr1	6223891	6224092	AT1G18080_1	201,	0,	7.07528	201.965
Chr1	6227524	6227723	AT1G18090_1	199,	0,	6.0376	2.2245
Chr1	6244444	6244642	AT1G18150_1	198,	0,	9.2686	20.1731
Chr1	6247436	6247535	AT1G18150_2	99,	0,	1.95969	20.1731
Chr1	6253831	6254030	AT1G18160_1	199,	0,	9.22062	7.31178
Chr1	6255149	6255248	AT1G18170_1	99,	0,	1.80733	47.8264
Chr1	6255490	6255685	AT1G18170_2	195,	0,	9.33901	47.8264
Chr1	6259681	6260045	AT1G18190_2	79,171,	0,193,	3.21311	3.41901
Chr1	6276973	6277123	AT1G18250_1	150,	0,	1.80505	20.3072
Chr1	6277694	6277962	AT1G18250_2	85,15,	0,253,	2.07043	20.3072
Chr1	6278886	6279086	AT1G18260_1	200,	0,	9.62505	14.1029
Chr1	6282474	6282718	AT1G18265_1	244,	0,	2.63575	5.64496
Chr1	6283468	6283718	AT1G18270_1	250,	0,	10.4803	5.87813
Chr1	6311540	6311687	AT1G18340_1	147,	0,	7.32775	4.21089
Chr1	6316792	6316990	AT1G18360_1	198,	0,	7.47381	11.3482
Chr1	6319697	6319847	AT1G18370_1	150,	0,	4.63364	3.47363
Chr1	6319945	6320045	AT1G18370_2	100,	0,	1.46859	3.47363
Chr1	6331794	6332047	AT1G18400_2	26,124,	0,129,	2.58644	3.41031
Chr1	6347618	6347768	AT1G18440_1	150,	0,	5.93885	9.60469
Chr1	6351812	6351912	AT1G18450_1	100,	0,	16.1251	14.5852
Chr1	6355965	6356113	AT1G18460_1	148,	0,	4.61367	4.66026
Chr1	6355994	6356444	AT1G18470_1	450,	0,	8.82069	7.70591
Chr1	6365618	6365718	AT1G18485_1	100,	0,	1.68069	5.14585
Chr1	6366014	6366164	AT1G18485_2	150,	0,	3.35494	5.14585
Chr1	6368581	6368731	AT1G18490_1	150,	0,	7.87283	6.15718
Chr1	6369314	6369665	AT1G18500_1	351,	0,	3.5083	23.1532
Chr1	6372780	6373030	AT1G18500_2	250,	0,	17.0572	23.1532
Chr1	6377285	6377736	AT1G18540_1	318,31,	0,420,	2.42563	145.418
Chr1	6397979	6398176	AT1G18580_1	197,	0,	6.28036	6.81344
Chr1	6400726	6400826	AT1G18600_1	100,	0,	2.00266	10.2072
Chr1	6402546	6402745	AT1G18600_2	199,	0,	11.1497	10.2072
Chr1	6414073	6414371	AT1G18620_1	298,	0,	2.73955	7.26455
Chr1	6416217	6416459	AT1G18630_1	242,	0,	22.4367	10.1051
Chr1	6416266	6416611	AT1G18640_1	345,	0,	18.6436	13.985
Chr1	6418887	6419086	AT1G18650_1	199,	0,	2.89542	14.2629
Chr1	6420442	6420543	AT1G18650_2	101,	0,	1.59866	14.2629
Chr1	6425552	6425800	AT1G18660_1	248,	0,	10.0753	14.6365
Chr1	6432034	6432181	AT1G18680_1	147,	0,	7.94943	4.4817
Chr1	6442804	6443085	AT1G18700_1	21,180,	0,101,	6.96534	7.94977
Chr1	6452771	6452969	AT1G18710_1	198,	0,	4.54772	3.44477
Chr1	6457873	6458072	AT1G18720_1	199,	0,	3.40745	51.5712
Chr1	6459536	6459735	AT1G18720_2	199,	0,	1.96807	51.5712
Chr1	6462051	6462295	AT1G18730_1	244,	0,	9.91446	77.4054
Chr1	6481305	6481769	AT1G18800_1	220,23,	0,441,	7.06929	18.694
Chr1	6504773	6504920	AT1G18850_1	147,	0,	1.97959	3.72864
Chr1	6546375	6546476	AT1G18950_1	101,	0,	3.03719	7.49731
Chr1	6546724	6546825	AT1G18950_2	101,	0,	3.49035	7.49731
Chr1	6550861	6551161	AT1G18950_3	300,	0,	4.78351	7.49731
Chr1	6551259	6551510	AT1G18950_4	251,	0,	3.24171	7.49731
Chr1	6551758	6552008	AT1G18950_5	250,	0,	7.69353	7.49731
Chr1	6586275	6586469	AT1G19080_1	194,	0,	10.9438	3.47951
Chr1	6601055	6601305	AT1G19100_2	250,	0,	7.77985	3.45745
Chr1	6605244	6605480	AT1G19110_1	51,50,	0,186,	2.81734	11.6969
Chr1	6605728	6605878	AT1G19110_2	150,	0,	6.96693	11.6969
Chr1	6609129	6609369	AT1G19120_1	240,	0,	9.34147	13.2999
Chr1	6609372	6609515	AT1G19130_1	143,	0,	7.78841	24.1396
Chr1	6610748	6611090	AT1G19140_1	342,	0,	10.0974	10.7591
Chr1	6618808	6618907	AT1G19170_1	99,	0,	5.88757	5.55377
Chr1	6649341	6649541	AT1G19240_1	200,	0,	9.38619	6.44279
Chr1	6663681	6663938	AT1G19270_1	34,116,	0,141,	2.09704	3.10333
Chr1	6671886	6672233	AT1G19300_1	347,	0,	2.91714	9.88666
Chr1	6672380	6672480	AT1G19300_2	100,	0,	2.19797	9.88666
Chr1	6676356	6676454	AT1G19310_1	98,	0,	7.07783	6.46897
Chr1	6680617	6680862	AT1G19330_1	245,	0,	7.76599	8.35824
Chr1	6689525	6689725	AT1G19350_1	200,	0,	1.81942	39.9636
Chr1	6690221	6690321	AT1G19350_2	100,	0,	2.24173	39.9636
Chr1	6690569	6690669	AT1G19350_3	100,	0,	4.39291	39.9636
Chr1	6690545	6690693	AT1G19360_1	148,	0,	3.8422	5.54266
Chr1	6712070	6712219	AT1G19400_1	149,	0,	8.73269	10.4025
Chr1	6724560	6724808	AT1G19430_1	248,	0,	6.38347	6.85526
Chr1	6726839	6727235	AT1G19430_2	396,	0,	3.9413	6.85526
Chr1	6730632	6730832	AT1G19440_1	200,	0,	2.97831	13.2753
Chr1	6751161	6751510	AT1G19485_1	349,	0,	9.02232	3.07537
Chr1	6760057	6760208	AT1G19520_1	151,	0,	1.90692	9.06978
Chr1	6760605	6760755	AT1G19520_2	150,	0,	2.61188	9.06978
Chr1	6762497	6762698	AT1G19520_3	201,	0,	4.92289	9.06978
Chr1	6777120	6777419	AT1G19580_1	299,	0,	10.3882	16.5165
Chr1	6780873	6781123	AT1G19600_1	250,	0,	7.12021	15.9252
Chr1	6796236	6796436	AT1G19650_1	200,	0,	8.88096	5.25285
Chr1	6800017	6800261	AT1G19660_1	244,	0,	6.00489	52.3439
Chr1	6807663	6807862	AT1G19680_1	199,	0,	9.74339	7.72473
Chr1	6807764	6808015	AT1G19690_1	251,	0,	5.84327	9.52682
Chr1	6809732	6809930	AT1G19700_1	198,	0,	6.36615	4.83645
Chr1	6810076	6810274	AT1G19700_2	198,	0,	2.46076	4.83645
Chr1	6811833	6811981	AT1G19700_3	148,	0,	1.9692	4.83645
Chr1	6816630	6816876	AT1G19710_1	246,	0,	8.34451	4.7375
Chr1	6816751	6816902	AT1G19715_1	151,	0,	9.40851	12.4791
Chr1	6822943	6823186	AT1G19730_1	243,	0,	5.70407	7.89076
Chr1	6824439	6824634	AT1G19740_1	195,	0,	3.46449	65.6029
Chr1	6832373	6832909	AT1G19770_1	95,346,	0,190,	3.68883	19.4702
Chr1	6847933	6848031	AT1G19800_1	98,	0,	11.7682	18.4657
Chr1	6852213	6852311	AT1G19830_1	98,	0,	2.92123	1.60438
Chr1	6891106	6891354	AT1G19850_1	248,	0,	4.85521	3.67968
Chr1	6891481	6891731	AT1G19860_1	250,	0,	6.53285	6.68619
Chr1	6900484	6900977	AT1G19880_1	493,	0,	3.22781	13.6337
Chr1	6914343	6914537	AT1G19910_1	194,	0,	6.2754	53.4868
Chr1	6914664	6914812	AT1G19920_1	148,	0,	6.28663	59.1116
Chr1	6916577	6916725	AT1G19920_2	148,	0,	2.91195	59.1116
Chr1	6925853	6926692	AT1G19950_1	29,654,	0,185,	3.28762	7.2881
Chr1	6931059	6931206	AT1G19970_1	147,	0,	9.95744	4.69711
Chr1	6935413	6935512	AT1G19990_1	99,	0,	1.80075	7.13769
Chr1	6935609	6935953	AT1G19990_2	2,96,50,	0,108,294,	2.0983	7.13769
Chr1	6936535	6936781	AT1G19990_3	246,	0,	5.76138	7.13769
Chr1	6938013	6938112	AT1G20010_1	99,	0,	4.22655	100.736
Chr1	6950121	6950267	AT1G20050_1	146,	0,	4.25445	27.3548
Chr1	6968615	6968862	AT1G20090_1	247,	0,	5.60581	29.7451
Chr1	6971522	6972120	AT1G20110_1	598,	0,	2.65631	16.815
Chr1	6974111	6974832	AT1G20110_2	18,332,	0,389,	12.8507	16.815
Chr1	7001235	7001533	AT1G20200_1	298,	0,	4.06885	31.8415
Chr1	7004969	7005116	AT1G20220_1	147,	0,	5.19812	34.1646
Chr1	7005341	7006334	AT1G20220_2	154,57,57,75,65,30,	0,273,437,611,773,963,	7.44705	34.1646
Chr1	7007852	7007999	AT1G20225_1	147,	0,	11.0627	25.9788
Chr1	7020296	7020543	AT1G20260_1	247,	0,	20.6169	77.071
Chr1	7020760	7021004	AT1G20270_1	244,	0,	6.70899	5.67822
Chr1	7029775	7030118	AT1G20300_1	343,	0,	3.32468	4.6637
Chr1	7039208	7039306	AT1G20330_1	98,	0,	1.57242	68.7289
Chr1	7043192	7043292	AT1G20340_1	100,	0,	3.50387	2083.62
Chr1	7083260	7083411	AT1G20430_1	151,	0,	3.12174	12.2152
Chr1	7085000	7085343	AT1G20440_1	180,18,	0,325,	2.91623	71.9676
Chr1	7088246	7088770	AT1G20450_1	441,3,	0,521,	3.92368	73.1803
Chr1	7093046	7093393	AT1G20460_1	347,	0,	8.90489	3.40549
Chr1	7103460	7103708	AT1G20510_1	248,	0,	8.11956	12.1104
Chr1	7105477	7105824	AT1G20510_2	347,	0,	2.14785	12.1104
Chr1	7115166	7115362	AT1G20540_1	196,	0,	14.1593	9.5215
Chr1	7119768	7119917	AT1G20560_1	149,	0,	9.54791	11.0279
Chr1	7126843	7127037	AT1G20575_1	194,	0,	9.56752	7.87979
Chr1	7130355	7130553	AT1G20580_1	198,	0,	8.20738	45.9139
Chr1	7137045	7137237	AT1G20610_2	80,19,	0,173,	1.75242	3.50525
Chr1	7149586	7149735	AT1G20630_1	149,	0,	13.7316	15.5251
Chr1	7157387	7157488	AT1G20640_1	101,	0,	1.77318	3.20986
Chr1	7157737	7157838	AT1G20640_2	101,	0,	1.56347	3.20986
Chr1	7167694	7167992	AT1G20670_2	298,	0,	9.72097	5.33193
Chr1	7179521	7179621	AT1G20696_1	100,	0,	2.15627	83.8549
Chr1	7181042	7181475	AT1G20696_2	31,319,	0,114,	3.01154	83.8549
Chr1	7215058	7215205	AT1G20770_1	147,	0,	11.955	14.0301
Chr1	7216555	7216654	AT1G20770_2	99,	0,	1.91931	14.0301
Chr1	7220344	7220444	AT1G20780_1	100,	0,	2.63006	7.27521
Chr1	7220543	7220743	AT1G20780_2	200,	0,	6.39589	7.27521
Chr1	7233367	7233513	AT1G20810_1	146,	0,	9.50384	43.5336
Chr1	7234756	7235081	AT1G20816_1	13,224,	0,101,	8.38528	7.45397
Chr1	7244677	7244878	AT1G20830_1	201,	0,	11.2283	11.9319
Chr1	7276991	7277190	AT1G20910_1	199,	0,	14.7636	6.28574
Chr1	7285388	7286329	AT1G20920_1	941,	0,	13.4138	10.731
Chr1	7289051	7289151	AT1G20920_2	100,	0,	7.29984	10.731
Chr1	7289645	7289794	AT1G20920_3	149,	0,	11.8599	10.731
Chr1	7297337	7297535	AT1G20950_1	198,	0,	6.15243	25.9522
Chr1	7301287	7301386	AT1G20950_2	99,	0,	2.53032	25.9522
Chr1	7301748	7301998	AT1G20960_1	250,	0,	13.6103	24.4529
Chr1	7308569	7308869	AT1G20960_2	300,	0,	3.35268	24.4529
Chr1	7309068	7309368	AT1G20960_3	300,	0,	4.00347	24.4529
Chr1	7314390	7314539	AT1G20970_1	149,	0,	1.37138	6.51959
Chr1	7317404	7317772	AT1G20970_2	37,113,	0,255,	2.64618	6.51959
Chr1	7318393	7319027	AT1G20970_3	356,141,	0,493,	8.04913	6.51959
Chr1	7319225	7319474	AT1G20970_4	249,	0,	6.70621	6.51959
Chr1	7325217	7325318	AT1G20980_1	101,	0,	1.68379	16.969
Chr1	7328842	7329142	AT1G20980_2	300,	0,	6.40796	16.969
Chr1	7373964	7374114	AT1G21060_1	150,	0,	6.67181	4.63437
Chr1	7375590	7375739	AT1G21065_1	149,	0,	6.3698	73.9271
Chr1	7376017	7376317	AT1G21070_1	300,	0,	3.96313	5.32409
Chr1	7378686	7378836	AT1G21080_1	150,	0,	3.37206	15.8671
Chr1	7384899	7385137	AT1G21090_1	108,39,	0,199,	1.95556	3.6038
Chr1	7385656	7385803	AT1G21090_2	147,	0,	2.81454	3.6038
Chr1	7408030	7408335	AT1G21160_1	156,44,	0,261,	2.3973	3.30218
Chr1	7410213	7410407	AT1G21160_2	3,97,	0,97,	1.81302	3.30218
Chr1	7411577	7411976	AT1G21160_3	399,	0,	7.06461	3.30218
Chr1	7412075	7412176	AT1G21160_4	101,	0,	1.90133	3.30218
Chr1	7413276	7413804	AT1G21170_1	193,7,	0,521,	5.3707	3.88824
Chr1	7419759	7419952	AT1G21190_1	193,	0,	6.4807	21.003
Chr1	7422633	7422783	AT1G21200_1	150,	0,	4.51136	2.49416
Chr1	7439417	7439567	AT1G21250_1	150,	0,	3.27286	61.4283
Chr1	7453536	7454231	AT1G21310_1	31,553,	0,142,	4.88363	26.6026
Chr1	7454376	7454863	AT1G21310_2	487,	0,	5.05431	26.6026
Chr1	7476950	7477528	AT1G21350_1	176,87,31,	0,381,547,	3.88167	24.0424
Chr1	7485420	7485568	AT1G21370_1	148,	0,	4.9922	4.83041
Chr1	7489913	7490210	AT1G21390_1	297,	0,	2.1929	2.49445
Chr1	7496099	7496346	AT1G21400_1	247,	0,	5.3917	5.49092
Chr1	7511307	7511653	AT1G21450_1	346,	0,	2.94338	3.72203
Chr1	7511894	7511992	AT1G21460_1	98,	0,	2.92601	13.3335
Chr1	7529947	7530192	AT1G21500_1	245,	0,	1.98596	123.104
Chr1	7534687	7534784	AT1G21520_1	97,	0,	4.44754	5.52208
Chr1	7556765	7557013	AT1G21560_1	248,	0,	8.59538	6.28247
Chr1	7557238	7557687	AT1G21580_1	449,	0,	6.31758	5.17567
Chr1	7565466	7565616	AT1G21580_2	150,	0,	3.20594	5.17567
Chr1	7566327	7566624	AT1G21590_1	297,	0,	3.31729	16.7922
Chr1	7571188	7572131	AT1G21600_1	442,90,10,	0,553,933,	5.03915	86.4223
Chr1	7576233	7576333	AT1G21610_1	100,	0,	1.9681	5.4968
Chr1	7578132	7578317	AT1G21610_2	33,67,	0,118,	1.74551	5.4968
Chr1	7578664	7578864	AT1G21610_3	200,	0,	7.13856	5.4968
Chr1	7592640	7592890	AT1G21640_1	250,	0,	16.0138	12.6449
Chr1	7592713	7593012	AT1G21650_1	299,	0,	16.4227	3.83634
Chr1	7608878	7609026	AT1G21660_1	148,	0,	9.46699	15.1131
Chr1	7618287	7618482	AT1G21690_1	195,	0,	12.7292	10.0977
Chr1	7620049	7620199	AT1G21700_1	150,	0,	4.839	6.72929
Chr1	7620346	7620495	AT1G21700_2	149,	0,	4.30722	6.72929
Chr1	7623681	7623781	AT1G21700_3	100,	0,	4.30877	6.72929
Chr1	7628040	7628190	AT1G21720_1	150,	0,	9.53212	39.1424
Chr1	7635713	7635814	AT1G21730_1	101,	0,	2.05611	3.10092
Chr1	7644739	7644890	AT1G21740_2	151,	0,	2.85638	1.85298
Chr1	7648561	7648708	AT1G21750_1	147,	0,	7.0534	57.3686
Chr1	7651572	7651816	AT1G21760_1	244,	0,	4.94026	7.6065
Chr1	7652176	7652276	AT1G21780_1	100,	0,	1.9944	10.2358
Chr1	7653767	7654014	AT1G21780_2	247,	0,	7.33947	10.2358
Chr1	7655685	7655834	AT1G21790_1	149,	0,	6.04546	4.64551
Chr1	7661623	7662338	AT1G21830_1	161,82,	0,633,	2.16665	5.47266
Chr1	7680828	7680975	AT1G21880_1	147,	0,	1.92426	20.3971
Chr1	7682445	7682592	AT1G21880_2	147,	0,	7.00086	20.3971
Chr1	7690950	7691250	AT1G21900_1	300,	0,	6.82977	21.4736
Chr1	7714217	7714411	AT1G21930_1	194,	0,	11.385	14.0383
Chr1	7735451	7735896	AT1G21980_1	445,	0,	3.07349	6.67525
Chr1	7738376	7738624	AT1G21980_2	248,	0,	5.51944	6.67525
Chr1	7757140	7757338	AT1G22020_1	198,	0,	11.465	6.71218
Chr1	7759372	7759669	AT1G22030_1	297,	0,	4.95633	3.76314
Chr1	7791889	7792089	AT1G22070_1	200,	0,	9.23618	14.2398
Chr1	7814757	7815044	AT1G22140_1	287,	0,	7.41677	13.6392
Chr1	7823731	7823828	AT1G22160_1	97,	0,	2.76524	12.5546
Chr1	7828375	7828525	AT1G22180_1	150,	0,	3.77008	2.86618
Chr1	7837659	7837855	AT1G22200_1	196,	0,	24.2903	16.2238
Chr1	7875380	7875822	AT1G22280_1	442,	0,	5.10552	17.2769
Chr1	7878807	7879323	AT1G22300_1	344,99,	0,417,	7.07803	85.4517
Chr1	7880551	7881150	AT1G22300_2	133,114,	0,485,	3.11136	85.4517
Chr1	7882644	7882743	AT1G22310_2	99,	0,	1.70473	2.69056
Chr1	7888377	7889385	AT1G22330_1	246,251,	0,757,	3.78659	8.7964
Chr1	7895104	7895304	AT1G22360_1	200,	0,	5.00239	13.8403
Chr1	7898161	7898310	AT1G22370_1	149,	0,	3.64328	4.53206
Chr1	7903906	7904104	AT1G22400_1	198,	0,	5.93029	4.27357
Chr1	7914707	7914856	AT1G22410_1	149,	0,	8.1582	57.915
Chr1	7921647	7921795	AT1G22430_1	148,	0,	10.0329	20.4512
Chr1	7926901	7927099	AT1G22450_1	198,	0,	8.06347	39.5996
Chr1	7950866	7951064	AT1G22510_1	198,	0,	11.7688	2.77792
Chr1	7953117	7953261	AT1G22520_1	144,	0,	8.62762	16.1046
Chr1	7955642	7955791	AT1G22530_1	149,	0,	3.9554	36.9438
Chr1	7957378	7957675	AT1G22530_2	297,	0,	2.8001	36.9438
Chr1	7957773	7958120	AT1G22530_3	347,	0,	3.11182	36.9438
Chr1	7966188	7966436	AT1G22540_1	248,	0,	6.73809	5.12894
Chr1	7983884	7984234	AT1G22590_1	350,	0,	2.93418	9.32164
Chr1	7997596	7997995	AT1G22620_1	399,	0,	8.68452	3.90597
Chr1	8003953	8004206	AT1G22630_1	20,127,	0,126,	1.5785	79.7168
Chr1	8013401	8013647	AT1G22650_1	246,	0,	4.47652	3.90799
Chr1	8021433	8021682	AT1G22660_1	249,	0,	12.311	3.29494
Chr1	8050494	8050688	AT1G22740_1	194,	0,	14.1895	9.41128
Chr1	8052632	8052881	AT1G22750_1	249,	0,	6.00899	18.991
Chr1	8067245	8067642	AT1G22770_1	397,	0,	8.49292	5.17707
Chr1	8069161	8069259	AT1G22780_1	98,	0,	5.63811	118.924
Chr1	8071248	8071495	AT1G22790_1	247,	0,	6.38848	11.4
Chr1	8073964	8074259	AT1G22800_1	295,	0,	9.037	5.41766
Chr1	8080280	8080476	AT1G22840_1	196,	0,	15.2112	89.9487
Chr1	8080578	8080921	AT1G22850_1	140,7,	0,336,	2.62118	64.1373
Chr1	8082638	8082833	AT1G22850_2	195,	0,	2.71464	64.1373
Chr1	8099594	8099841	AT1G22882_1	247,	0,	2.90934	9.11236
Chr1	8100528	8100775	AT1G22882_2	247,	0,	2.49857	9.11236
Chr1	8100873	8101070	AT1G22882_3	197,	0,	6.75568	9.11236
Chr1	8101168	8101267	AT1G22882_4	99,	0,	2.45717	9.11236
Chr1	8109723	8109873	AT1G22920_1	150,	0,	10.8468	13.6266
Chr1	8121454	8121803	AT1G22930_1	349,	0,	6.12403	13.9151
Chr1	8121902	8122052	AT1G22930_2	150,	0,	6.78713	13.9151
Chr1	8124821	8125019	AT1G22940_1	198,	0,	2.96548	11.8667
Chr1	8125071	8125270	AT1G22950_1	199,	0,	12.6992	8.62291
Chr1	8130695	8130893	AT1G22970_1	198,	0,	2.71098	5.40113
Chr1	8150165	8150315	AT1G23020_1	150,	0,	3.29648	3.73256
Chr1	8150665	8151064	AT1G23020_2	399,	0,	2.68592	3.73256
Chr1	8180487	8180738	AT1G23080_1	251,	0,	5.47915	28.3795
Chr1	8183150	8183251	AT1G23080_2	101,	0,	1.44101	28.3795
Chr1	8183399	8183550	AT1G23080_3	151,	0,	2.30377	28.3795
Chr1	8219443	8219592	AT1G23180_1	149,	0,	4.82293	11.5035
Chr1	8224155	8224400	AT1G23190_1	245,	0,	11.7688	42.0732
Chr1	8234630	8234825	AT1G23205_1	195,	0,	2.88109	28.7004
Chr1	8244117	8244308	AT1G23220_1	191,	0,	13.6544	12.7906
Chr1	8247055	8247252	AT1G23230_1	36,64,	0,133,	1.60724	6.69355
Chr1	8251589	8251887	AT1G23230_2	298,	0,	9.825	6.69355
Chr1	8257100	8257484	AT1G23260_1	164,34,	0,350,	3.99861	20.0106
Chr1	8260753	8261761	AT1G23280_1	165,122,118,141,87,	0,260,481,691,921,	2.50429	18.6287
Chr1	8268580	8268777	AT1G23310_1	197,	0,	6.81916	392.668
Chr1	8279703	8279953	AT1G23330_1	250,	0,	8.11939	3.22224
Chr1	8295225	8295422	AT1G23360_1	197,	0,	12.0143	12.7876
Chr1	8312083	8312333	AT1G23400_1	250,	0,	7.25601	19.0765
Chr1	8314128	8314229	AT1G23400_2	101,	0,	1.74419	19.0765
Chr1	8314527	8314678	AT1G23400_3	151,	0,	3.07401	19.0765
Chr1	8324050	8324199	AT1G23440_1	149,	0,	9.69827	5.22696
Chr1	8338385	8338582	AT1G23490_1	197,	0,	5.84597	133.312
Chr1	8386027	8386127	AT1G23710_1	100,	0,	2.59031	4.91078
Chr1	8401263	8401455	AT1G23750_1	192,	0,	11.0875	6.76036
Chr1	8406859	8407105	AT1G23780_1	246,	0,	3.8832	11.4552
Chr1	8422740	8422936	AT1G23820_1	196,	0,	10.6557	72.466
Chr1	8427794	8428040	AT1G23860_2	246,	0,	17.3903	7.99729
Chr1	8447133	8447482	AT1G23900_1	349,	0,	14.2202	8.93191
Chr1	8469629	8469728	AT1G23950_1	99,	0,	10.9243	16.0012
Chr1	8478490	8478640	AT1G23960_1	150,	0,	9.56033	16.0209
Chr1	8503826	8503975	AT1G24040_1	149,	0,	7.27128	9.26395
Chr1	8508566	8508811	AT1G24050_1	245,	0,	20.1804	33.7147
Chr1	8525481	8525826	AT1G24100_1	345,	0,	5.83046	41.7442
Chr1	8526791	8526989	AT1G24100_2	198,	0,	1.87338	41.7442
Chr1	8529262	8529463	AT1G24120_1	201,	0,	6.50897	20.8561
Chr1	8545390	8545491	AT1G24148_1	101,	0,	2.51601	9.04489
Chr1	8551536	8551687	AT1G24150_2	151,	0,	2.68412	3.85544
Chr1	8553460	8553608	AT1G24160_1	148,	0,	5.61211	14.0869
Chr1	8554632	8555180	AT1G24160_2	152,292,	0,256,	3.36578	14.0869
Chr1	8555277	8555426	AT1G24160_3	149,	0,	1.23819	14.0869
Chr1	8560565	8561107	AT1G24180_1	256,66,21,	0,373,521,	3.5538	22.9398
Chr1	8565468	8565618	AT1G24190_2	150,	0,	1.66479	4.2006
Chr1	8568817	8568967	AT1G24190_3	150,	0,	3.56371	4.2006
Chr1	8587661	8588131	AT1G24240_1	28,267,	0,203,	4.78414	6.1561
Chr1	8604168	8604414	AT1G24267_1	246,	0,	14.3074	15.9778
Chr1	8612383	8612531	AT1G24280_1	148,	0,	7.92985	5.61328
Chr1	8614412	8614760	AT1G24300_1	348,	0,	3.91388	8.20847
Chr1	8620465	8620565	AT1G24300_2	100,	0,	2.493	8.20847
Chr1	8624211	8624510	AT1G24310_1	299,	0,	2.27668	9.31811
Chr1	8626156	8626405	AT1G24310_2	249,	0,	10.1711	9.31811
Chr1	8638390	8638490	AT1G24340_1	100,	0,	2.12777	3.17431
Chr1	8638638	8638986	AT1G24340_2	348,	0,	9.20538	3.17431
Chr1	8638665	8638811	AT1G24350_1	146,	0,	2.80946	4.63383
Chr1	8638907	8639102	AT1G24350_2	195,	0,	8.09923	4.63383
Chr1	8643258	8643405	AT1G24360_1	147,	0,	15.7706	68.8545
Chr1	8665080	8665227	AT1G24450_1	147,	0,	5.64159	5.79488
Chr1	8682293	8682491	AT1G24490_1	198,	0,	3.0104	15.106
Chr1	8684550	8684827	AT1G24490_2	33,165,	0,112,	1.89819	15.106
Chr1	8684925	8685271	AT1G24490_3	346,	0,	7.16286	15.106
Chr1	8685370	8685571	AT1G24510_1	201,	0,	10.9112	48.6158
Chr1	8703295	8703492	AT1G24560_1	197,	0,	3.21894	8.43882
Chr1	8704680	8705436	AT1G24560_2	32,117,147,	0,160,609,	2.74162	8.43882
Chr1	8705534	8705830	AT1G24560_3	296,	0,	5.37364	8.43882
Chr1	8720750	8720951	AT1G24610_1	201,	0,	6.70621	16.3944
Chr1	8753871	8754121	AT1G24706_1	250,	0,	1.76499	5.24906
Chr1	8754368	8754858	AT1G24706_2	107,143,	0,347,	4.36263	5.24906
Chr1	8754956	8755057	AT1G24706_3	101,	0,	3.57678	5.24906
Chr1	8755205	8755554	AT1G24706_4	349,	0,	20.4719	5.24906
Chr1	8759630	8759976	AT1G24764_1	346,	0,	6.41475	12.2117
Chr1	8760191	8760339	AT1G24764_2	148,	0,	1.69484	12.2117
Chr1	8837233	8837483	AT1G25220_1	250,	0,	5.43289	14.6203
Chr1	8849426	8849574	AT1G25250_1	148,	0,	3.39325	4.2551
Chr1	8851004	8851643	AT1G25250_2	639,	0,	6.79551	4.2551
Chr1	8853981	8854231	AT1G25260_1	250,	0,	9.35138	21.1456
Chr1	8862077	8862306	AT1G25277_1	50,98,	0,131,	2.36668	1.17
Chr1	8868947	8869094	AT1G25290_1	147,	0,	5.92682	8.02933
Chr1	8889167	8889317	AT1G25350_1	150,	0,	9.67068	16.9005
Chr1	8905654	8906005	AT1G25380_1	351,	0,	7.80726	9.38369
Chr1	8911440	8911589	AT1G25400_1	149,	0,	2.30005	2.06512
Chr1	8917969	8918218	AT1G25420_1	249,	0,	12.5874	9.50636
Chr1	8939977	8940320	AT1G25450_1	343,	0,	1.78611	17.6342
Chr1	8950384	8950584	AT1G25480_1	200,	0,	1.68824	3.04599
Chr1	8954914	8955013	AT1G25490_1	99,	0,	5.2624	35.1699
Chr1	8960433	8960534	AT1G25510_1	101,	0,	1.82498	4.35423
Chr1	8960733	8960884	AT1G25510_2	151,	0,	3.13354	4.35423
Chr1	8964171	8964466	AT1G25520_1	14,182,	0,113,	9.82071	6.52698
Chr1	8969607	8969854	AT1G25540_2	247,	0,	4.15626	5.12711
Chr1	8991857	8992208	AT1G25570_1	351,	0,	3.83562	11.406
Chr1	8995238	8995467	AT1G25570_2	35,116,	0,113,	3.00557	11.406
Chr1	8996811	8997058	AT1G25580_1	247,	0,	11.8387	5.06698
Chr1	8997391	8997589	AT1G25580_2	198,	0,	1.45913	5.06698
Chr1	8998245	8998344	AT1G25580_3	99,	0,	1.45652	5.06698
Chr1	9002383	9002633	AT1G25682_1	250,	0,	6.66694	7.41462
Chr1	9022568	9022769	AT1G26090_1	201,	0,	6.85118	7.86646
Chr1	9022590	9022738	AT1G26100_1	148,	0,	8.67668	6.42079
Chr1	9024390	9024688	AT1G26110_1	298,	0,	6.2876	56.3438
Chr1	9028425	9028625	AT1G26120_1	200,	0,	20.3649	5.22662
Chr1	9039677	9039927	AT1G26150_1	250,	0,	11.0904	14.9077
Chr1	9041962	9042411	AT1G26150_2	449,	0,	5.34156	14.9077
Chr1	9042509	9042759	AT1G26150_3	250,	0,	4.1243	14.9077
Chr1	9044518	9044762	AT1G26160_1	244,	0,	5.96245	14.8425
Chr1	9047341	9047671	AT1G26170_1	248,1,	0,329,	8.09313	5.91497
Chr1	9056595	9056842	AT1G26180_1	247,	0,	6.46322	11.4651
Chr1	9067719	9068012	AT1G26210_1	293,	0,	2.03248	16.1047
Chr1	9072304	9072502	AT1G26230_1	198,	0,	6.18831	14.6701
Chr1	9087685	9087907	AT1G26260_1	77,72,	0,150,	2.99296	1.92122
Chr1	9089616	9089814	AT1G26270_1	198,	0,	1.88854	15.2427
Chr1	9090060	9090258	AT1G26270_2	198,	0,	2.89432	15.2427
Chr1	9095866	9096065	AT1G26300_1	199,	0,	7.30584	2.72194
Chr1	9114692	9114882	AT1G26340_1	190,	0,	7.74778	9.72117
Chr1	9121541	9121741	AT1G26370_1	200,	0,	16.0148	5.10982
Chr1	9149134	9149532	AT1G26450_1	142,8,	0,390,	2.42314	2.04566
Chr1	9151776	9152075	AT1G26460_1	299,	0,	3.79922	13.3672
Chr1	9154314	9154712	AT1G26460_2	398,	0,	8.12312	13.3672
Chr1	9163259	9163636	AT1G26520_1	244,51,	0,326,	3.71828	2.9971
Chr1	9172735	9172885	AT1G26550_1	150,	0,	19.1549	89.6163
Chr1	9186392	9186492	AT1G26580_1	100,	0,	1.76405	14.6797
Chr1	9186886	9186986	AT1G26580_2	100,	0,	1.95003	14.6797
Chr1	9187182	9187479	AT1G26580_3	297,	0,	4.71271	14.6797
Chr1	9207070	9207269	AT1G26630_1	199,	0,	3.57628	427.263
Chr1	9207431	9207827	AT1G26640_1	284,11,	0,385,	7.62289	10.0096
Chr1	9209754	9209853	AT1G26640_2	99,	0,	4.19116	10.0096
Chr1	9217765	9217913	AT1G26670_1	148,	0,	11.2332	26.7963
Chr1	9245027	9245263	AT1G26740_1	236,	0,	20.8743	13.9782
Chr1	9248035	9248226	AT1G26750_1	191,	0,	5.80125	22.3991
Chr1	9250285	9250678	AT1G26761_1	393,	0,	3.05606	11.427
Chr1	9285660	9285759	AT1G26800_1	99,	0,	1.99381	1.91614
Chr1	9298082	9298480	AT1G26830_1	398,	0,	3.75945	13.4274
Chr1	9300954	9301104	AT1G26850_1	150,	0,	11.1991	64.4514
Chr1	9303880	9304080	AT1G26850_2	200,	0,	1.94157	64.4514
Chr1	9315403	9315653	AT1G26880_1	250,	0,	9.00072	59.2514
Chr1	9322828	9322928	AT1G26910_1	100,	0,	7.88501	9.51289
Chr1	9329687	9329834	AT1G26920_1	147,	0,	1.6644	13.4471
Chr1	9344795	9345176	AT1G26940_1	59,235,	0,146,	10.4284	6.57051
Chr1	9351399	9351591	AT1G26945_1	192,	0,	2.20516	5.29666
Chr1	9357255	9357354	AT1G26960_1	99,	0,	1.81298	3.45097
Chr1	9376305	9376683	AT1G27000_1	9,283,	0,95,	18.3635	24.7391
Chr1	9396525	9396673	AT1G27060_1	148,	0,	7.46128	2.51471
Chr1	9396706	9396854	AT1G27070_1	148,	0,	10.1087	3.8461
Chr1	9403949	9404048	AT1G27090_1	99,	0,	4.57447	54.6976
Chr1	9407232	9407481	AT1G27100_1	249,	0,	3.15514	15.0453
Chr1	9422147	9422495	AT1G27120_1	97,152,	0,196,	3.88292	6.39992
Chr1	9431830	9432212	AT1G27150_1	65,231,	0,151,	10.2745	5.70153
Chr1	9484364	9484609	AT1G27310_1	245,	0,	10.2984	51.6045
Chr1	9487235	9487335	AT1G27320_1	100,	0,	1.99378	14.5968
Chr1	9491655	9491893	AT1G27320_2	18,131,	0,107,	2.22058	14.5968
Chr1	9491992	9492533	AT1G27320_3	109,338,	0,203,	8.25933	14.5968
Chr1	9493905	9494049	AT1G27330_1	144,	0,	3.03726	32.8053
Chr1	9497936	9498036	AT1G27340_1	100,	0,	9.83073	18.1957
Chr1	9498142	9498287	AT1G27350_1	145,	0,	9.02145	27.6423
Chr1	9503624	9503824	AT1G27360_1	200,	0,	7.46628	5.13599
Chr1	9511000	9511149	AT1G27385_1	149,	0,	12.5301	20.1075
Chr1	9513177	9513469	AT1G27390_1	292,	0,	6.50061	18.338
Chr1	9516525	9516822	AT1G27400_1	54,145,	0,152,	5.73572	106.115
Chr1	9520874	9521273	AT1G27430_1	399,	0,	6.79521	7.76183
Chr1	9527643	9527978	AT1G27435_1	335,	0,	3.14005	22.2988
Chr1	9531194	9531342	AT1G27440_2	148,	0,	3.15325	3.18921
Chr1	9533654	9534043	AT1G27450_1	3,293,	0,96,	5.49654	84.7564
Chr1	9537315	9537515	AT1G27460_1	200,	0,	6.78453	6.81983
Chr1	9545942	9546187	AT1G27480_1	245,	0,	3.04338	41.4162
Chr1	9554807	9555005	AT1G27510_1	198,	0,	17.8257	17.9307
Chr1	9562042	9562289	AT1G27520_1	247,	0,	20.1216	5.91416
Chr1	9562635	9562784	AT1G27530_1	149,	0,	17.7589	30.5525
Chr1	9589855	9590051	AT1G27580_1	196,	0,	7.65766	8.3562
Chr1	9597547	9597904	AT1G27595_1	157,42,	0,315,	4.54369	4.77789
Chr1	9603580	9603728	AT1G27600_1	148,	0,	6.81686	10.9265
Chr1	9614088	9614237	AT1G27630_1	149,	0,	16.691	10.2053
Chr1	9615787	9616279	AT1G27650_1	492,	0,	3.87774	23.9268
Chr1	9634222	9634547	AT1G27680_1	51,199,	0,126,	3.69066	9.47326
Chr1	9638254	9638503	AT1G27690_1	249,	0,	5.48978	5.60233
Chr1	9639956	9640105	AT1G27695_1	149,	0,	9.20091	2.89822
Chr1	9639907	9640401	AT1G27700_1	494,	0,	7.24632	7.08592
Chr1	9660564	9660962	AT1G27750_1	398,	0,	2.84016	5.19788
Chr1	9667002	9667451	AT1G27752_1	449,	0,	8.65471	7.83431
Chr1	9668656	9668807	AT1G27760_1	151,	0,	2.74227	17.7623
Chr1	9671357	9671607	AT1G27760_2	250,	0,	13.7459	17.7623
Chr1	9671681	9671830	AT1G27770_1	149,	0,	8.06506	13.149
Chr1	9693105	9693509	AT1G27840_1	271,26,	0,378,	6.40422	6.22459
Chr1	9703447	9703944	AT1G27850_1	497,	0,	4.32182	6.79219
Chr1	9715489	9715736	AT1G27900_1	247,	0,	11.5205	5.39932
Chr1	9731406	9731507	AT1G27930_1	101,	0,	1.96694	16.2544
Chr1	9732352	9732452	AT1G27930_2	100,	0,	2.75677	16.2544
Chr1	9746805	9746951	AT1G27970_1	146,	0,	1.70809	39.1137
Chr1	9747822	9748017	AT1G27970_2	195,	0,	5.3349	39.1137
Chr1	9752569	9752719	AT1G27980_1	150,	0,	10.6924	3.6763
Chr1	9775571	9775869	AT1G28050_1	298,	0,	3.89288	13.5934
Chr1	9776952	9777101	AT1G28050_2	149,	0,	2.20321	13.5934
Chr1	9779317	9779566	AT1G28060_1	249,	0,	7.71537	8.94395
Chr1	9782062	9782659	AT1G28060_2	597,	0,	8.18871	8.94395
Chr1	9798581	9799017	AT1G28090_1	22,324,	0,112,	9.07394	6.27232
Chr1	9803810	9804196	AT1G28100_1	282,66,	0,320,	5.07381	2.76664
Chr1	9803836	9804181	AT1G28110_1	345,	0,	5.28585	6.68237
Chr1	9813027	9813225	AT1G28120_1	198,	0,	16.6671	13.0245
Chr1	9832810	9833056	AT1G28140_1	246,	0,	9.06289	38.7622
Chr1	9834934	9835178	AT1G28150_1	244,	0,	5.30894	16.114
Chr1	9850287	9850436	AT1G28200_1	149,	0,	3.46672	11.4653
Chr1	9852152	9852252	AT1G28200_2	100,	0,	2.32242	11.4653
Chr1	9875340	9875531	AT1G28250_1	191,	0,	10.0408	9.76118
Chr1	9886487	9886686	AT1G28280_2	199,	0,	2.25969	11.4459
Chr1	9886982	9887280	AT1G28280_3	298,	0,	2.36994	11.4459
Chr1	9890224	9890324	AT1G28290_1	100,	0,	4.35154	89.2448
Chr1	9890422	9890719	AT1G28290_2	297,	0,	4.0795	89.2448
Chr1	9920466	9920714	AT1G28320_1	248,	0,	8.3407	8.05795
Chr1	9933980	9934128	AT1G28330_1	148,	0,	2.4376	19.342
Chr1	9943369	9943518	AT1G28340_1	149,	0,	23.3766	14.1829
Chr1	9949586	9949785	AT1G28350_1	199,	0,	15.1673	8.30213
Chr1	9963647	9963747	AT1G28380_1	100,	0,	2.46611	14.7131
Chr1	9966020	9966220	AT1G28380_2	200,	0,	4.32621	14.7131
Chr1	9967016	9967264	AT1G28390_1	248,	0,	3.42181	2.40532
Chr1	9969395	9969745	AT1G28395_1	350,	0,	10.33	8.75589
Chr1	9971381	9971531	AT1G28395_2	150,	0,	2.38656	8.75589
Chr1	9973063	9973698	AT1G28400_1	635,	0,	3.34875	18.7413
Chr1	9981524	9982205	AT1G28420_1	13,90,165,81,	0,105,309,600,	6.935	5.49037
Chr1	9986893	9987638	AT1G28420_2	745,	0,	4.40911	5.49037
Chr1	10013723	10013918	AT1G28480_1	195,	0,	3.51843	1.32043
Chr1	10017207	10017999	AT1G28490_1	59,91,66,268,	0,204,380,524,	4.23371	9.68356
Chr1	10025193	10025830	AT1G28510_1	41,56,	0,581,	1.48002	17.6141
Chr1	10026021	10026263	AT1G28510_2	242,	0,	16.0514	17.6141
Chr1	10031302	10031892	AT1G28520_1	590,	0,	4.77931	7.90531
Chr1	10036755	10036955	AT1G28540_1	200,	0,	13.8345	2.89805
Chr1	10041725	10041975	AT1G28570_1	250,	0,	7.95166	4.63802
Chr1	10044435	10044682	AT1G28580_1	247,	0,	3.95469	12.464
Chr1	10053637	10053931	AT1G28610_1	294,	0,	8.90725	13.0945
Chr1	10071756	10071855	AT1G28660_1	99,	0,	2.52924	10.2633
Chr1	10072230	10072329	AT1G28660_2	99,	0,	1.39856	10.2633
Chr1	10074555	10074654	AT1G28670_1	99,	0,	2.92201	13.7342
Chr1	10078287	10078485	AT1G28680_1	198,	0,	3.21064	12.8608
Chr1	10086709	10087004	AT1G28710_1	295,	0,	8.7574	3.0942
Chr1	10087672	10087771	AT1G28710_2	99,	0,	1.62237	3.0942
Chr1	10109599	10109750	AT1G28960_1	151,	0,	3.85819	6.51677
Chr1	10109998	10110199	AT1G28960_2	201,	0,	3.16213	6.51677
Chr1	10129048	10129298	AT1G29030_1	250,	0,	7.65324	4.36167
Chr1	10135142	10135339	AT1G29040_1	197,	0,	6.90238	9.28026
Chr1	10136294	10136393	AT1G29050_1	99,	0,	6.42023	9.81105
Chr1	10149388	10149633	AT1G29060_1	245,	0,	9.67111	4.47842
Chr1	10151165	10151311	AT1G29070_1	146,	0,	6.93158	271.057
Chr1	10178125	10178422	AT1G29120_1	297,	0,	5.89567	13.0168
Chr1	10182512	10182611	AT1G29150_1	99,	0,	11.425	32.9868
Chr1	10184170	10184366	AT1G29160_1	196,	0,	2.9775	3.38219
Chr1	10190186	10190386	AT1G29170_1	200,	0,	5.13237	3.36672
Chr1	10192531	10192682	AT1G29170_2	151,	0,	3.53751	3.36672
Chr1	10210567	10210665	AT1G29220_1	98,	0,	17.2206	9.81979
Chr1	10212383	10212481	AT1G29220_2	98,	0,	5.2047	9.81979
Chr1	10216828	10216978	AT1G29240_1	150,	0,	8.35457	6.20991
Chr1	10219642	10219793	AT1G29240_2	151,	0,	2.334	6.20991
Chr1	10223315	10223465	AT1G29250_1	150,	0,	15.4359	36.659
Chr1	10225883	10226030	AT1G29260_1	147,	0,	8.23795	10.5047
Chr1	10247906	10248056	AT1G29300_1	150,	0,	2.25949	3.70521
Chr1	10254492	10254643	AT1G29310_1	151,	0,	12.7997	14.3384
Chr1	10257999	10258343	AT1G29320_1	344,	0,	11.1075	6.6229
Chr1	10258296	10258587	AT1G29330_1	291,	0,	14.8579	2.745
Chr1	10268520	10268820	AT1G29350_1	300,	0,	10.8288	5.57516
Chr1	10277846	10278142	AT1G29370_1	296,	0,	12.284	5.46709
Chr1	10286263	10286460	AT1G29390_1	197,	0,	11.3053	47.0073
Chr1	10288274	10288372	AT1G29395_1	98,	0,	2.41788	78.5768
Chr1	10303172	10303271	AT1G29430_1	99,	0,	2.5259	2.36698
Chr1	10309705	10309801	AT1G29465_1	96,	0,	4.23104	3.37792
Chr1	10324893	10324993	AT1G29530_1	100,	0,	3.92853	17.9414
Chr1	10326241	10326749	AT1G29530_2	25,174,	0,334,	1.97874	17.9414
Chr1	10332126	10332276	AT1G29550_1	150,	0,	8.70457	5.23303
Chr1	10379068	10379365	AT1G29690_1	297,	0,	6.78196	5.09424
Chr1	10385043	10385384	AT1G29700_1	245,5,	0,336,	10.7389	21.6111
Chr1	10386745	10386895	AT1G29700_2	150,	0,	1.90692	21.6111
Chr1	10393758	10394059	AT1G29720_1	301,	0,	8.72465	6.20276
Chr1	10430108	10430452	AT1G29790_1	344,	0,	3.92702	8.06486
Chr1	10431731	10431927	AT1G29790_2	196,	0,	6.37198	8.06486
Chr1	10435422	10435617	AT1G29810_1	195,	0,	6.45019	4.95998
Chr1	10449464	10449871	AT1G29850_1	21,274,	0,133,	5.91031	28.5891
Chr1	10459506	10459755	AT1G29880_1	249,	0,	11.8916	43.0122
Chr1	10462619	10462769	AT1G29880_2	150,	0,	2.39066	43.0122
Chr1	10467002	10467302	AT1G29890_1	300,	0,	12.3416	8.11159
Chr1	10468252	10468401	AT1G29900_1	149,	0,	2.89225	34.4651
Chr1	10471913	10472162	AT1G29900_2	249,	0,	5.2762	34.4651
Chr1	10479204	10479403	AT1G29940_1	199,	0,	7.06758	6.88687
Chr1	10498399	10498549	AT1G29970_1	150,	0,	4.87408	4.8363
Chr1	10499702	10500000	AT1G29970_2	298,	0,	6.32157	4.8363
Chr1	10503338	10503439	AT1G29980_1	101,	0,	3.89928	11.3848
Chr1	10505988	10506089	AT1G29980_2	101,	0,	3.28709	11.3848
Chr1	10508866	10509056	AT1G29990_1	190,	0,	10.7124	20.3243
Chr1	10509255	10509555	AT1G30000_1	300,	0,	12.6688	6.52204
Chr1	10546658	10547169	AT1G30070_1	237,81,29,	0,332,482,	4.84521	7.63745
Chr1	10559595	10559795	AT1G30090_1	200,	0,	6.45483	7.12011
Chr1	10583609	10583758	AT1G30110_1	149,	0,	2.22267	2.98831
Chr1	10584251	10584350	AT1G30120_1	99,	0,	2.05756	54.6821
Chr1	10587716	10587914	AT1G30130_1	198,	0,	1.91015	7.33438
Chr1	10625099	10625299	AT1G30200_1	200,	0,	2.40661	13.985
Chr1	10626885	10627085	AT1G30200_2	200,	0,	5.71385	13.985
Chr1	10627233	10627380	AT1G30210_1	147,	0,	11.1462	18.621
Chr1	10628906	10629054	AT1G30210_2	148,	0,	1.95132	18.621
Chr1	10647411	10647602	AT1G30250_1	191,	0,	1.74653	17.8568
Chr1	10658529	10658825	AT1G30270_1	296,	0,	15.2154	4.16313
Chr1	10663335	10663832	AT1G30280_1	497,	0,	3.00747	10.7461
Chr1	10682126	10682488	AT1G30320_1	218,31,	0,331,	3.26849	3.64478
Chr1	10737501	10737843	AT1G30400_1	7,244,	0,98,	14.2704	15.0287
Chr1	10747014	10747214	AT1G30410_1	200,	0,	7.15616	4.05927
Chr1	10747363	10747463	AT1G30410_2	100,	0,	13.9059	4.05927
Chr1	10769071	10769468	AT1G30450_1	397,	0,	7.76544	6.81497
Chr1	10771307	10771704	AT1G30460_1	397,	0,	5.19214	5.51424
Chr1	10772001	10772150	AT1G30460_2	149,	0,	3.72735	5.51424
Chr1	10774559	10774659	AT1G30460_3	100,	0,	1.52454	5.51424
Chr1	10786398	10786548	AT1G30470_1	150,	0,	6.94473	15.0977
Chr1	10790656	10790999	AT1G30480_1	343,	0,	5.04571	6.22077
Chr1	10792382	10792578	AT1G30480_2	196,	0,	7.5874	6.22077
Chr1	10796222	10796422	AT1G30490_1	200,	0,	5.35146	8.82014
Chr1	10800794	10800894	AT1G30490_2	100,	0,	1.55811	8.82014
Chr1	10804498	10804744	AT1G30500_1	246,	0,	10.5262	4.15156
Chr1	10807126	10807323	AT1G30510_1	197,	0,	1.81047	10.0027
Chr1	10813430	10813630	AT1G30520_1	200,	0,	6.63066	10.6662
Chr1	10814953	10815052	AT1G30530_1	99,	0,	1.8994	50.8782
Chr1	10816125	10816224	AT1G30530_2	99,	0,	1.58418	50.8782
Chr1	10816812	10817109	AT1G30540_1	192,5,	0,292,	3.97037	4.78462
Chr1	10831722	10831922	AT1G30580_1	200,	0,	15.1005	70.281
Chr1	10835834	10836034	AT1G30590_1	200,	0,	12.1703	8.90172
Chr1	10847011	10847161	AT1G30610_1	150,	0,	4.20543	4.84728
Chr1	10847609	10847759	AT1G30610_2	150,	0,	2.35834	4.84728
Chr1	10858330	10858580	AT1G30630_1	250,	0,	6.63957	49.8594
Chr1	10886025	10886472	AT1G30680_1	447,	0,	12.1305	14.0675
Chr1	10888580	10888880	AT1G30690_1	300,	0,	2.89208	30.9106
Chr1	10938002	10938250	AT1G30810_1	248,	0,	5.89092	4.67298
Chr1	10945005	10945351	AT1G30820_1	346,	0,	4.53192	5.61353
Chr1	10962847	10963182	AT1G30825_1	30,219,	0,116,	7.21734	5.55437
Chr1	10987663	10987764	AT1G30860_3	101,	0,	1.5034	1.76571
Chr1	10993148	10993442	AT1G30880_1	294,	0,	6.42717	24.2182
Chr1	10995974	10996124	AT1G30890_1	150,	0,	13.9816	9.96203
Chr1	11002682	11002930	AT1G30910_1	248,	0,	15.1562	15.5828
Chr1	11040348	11040644	AT1G30970_1	296,	0,	8.33376	9.08509
Chr1	11041737	11041886	AT1G30970_2	149,	0,	1.80702	9.08509
Chr1	11043526	11043674	AT1G30970_3	148,	0,	2.38862	9.08509
Chr1	11054779	11055382	AT1G31010_1	290,68,32,	0,369,571,	4.23093	2.7551
Chr1	11058604	11058893	AT1G31020_1	289,	0,	7.36126	6.35143
Chr1	11084865	11085015	AT1G31070_1	150,	0,	2.79836	11.059
Chr1	11088338	11088539	AT1G31070_2	201,	0,	7.61119	11.059
Chr1	11104335	11104632	AT1G31120_1	297,	0,	4.7353	2.7592
Chr1	11115613	11116001	AT1G31130_1	388,	0,	2.85319	19.1865
Chr1	11121506	11121705	AT1G31150_1	199,	0,	2.02322	2.81723
Chr1	11122698	11122890	AT1G31160_1	192,	0,	4.34571	19.3585
Chr1	11134239	11134390	AT1G31170_1	151,	0,	9.69975	16.7225
Chr1	11142759	11142910	AT1G31180_1	151,	0,	4.14431	36.5692
Chr1	11146592	11146930	AT1G31190_1	19,229,	0,109,	6.12615	37.9809
Chr1	11147018	11147260	AT1G31200_1	242,	0,	7.06742	3.63119
Chr1	11158339	11158438	AT1G31220_1	99,	0,	3.71498	7.47646
Chr1	11158535	11158683	AT1G31220_2	148,	0,	25.1902	7.47646
Chr1	11158667	11158817	AT1G31230_1	150,	0,	9.29209	27.684
Chr1	11158916	11159112	AT1G31230_2	73,27,	0,169,	1.48561	27.684
Chr1	11193721	11193820	AT1G31300_1	99,	0,	1.5699	12.8566
Chr1	11195958	11196251	AT1G31300_2	293,	0,	21.8254	12.8566
Chr1	11215755	11215949	AT1G31330_1	194,	0,	2.21631	1301.05
Chr1	11217054	11217153	AT1G31335_1	99,	0,	1.25375	4.19603
Chr1	11217933	11218125	AT1G31340_1	192,	0,	16.985	35.2302
Chr1	11221654	11221852	AT1G31350_1	198,	0,	5.12808	9.5644
Chr1	11246965	11247216	AT1G31410_1	251,	0,	10.4283	14.298
Chr1	11253466	11253616	AT1G31420_1	150,	0,	1.80041	45.047
Chr1	11253715	11253815	AT1G31420_2	100,	0,	11.7774	45.047
Chr1	11255933	11256180	AT1G31440_1	247,	0,	6.48017	8.71885
Chr1	11256603	11256752	AT1G31440_2	149,	0,	1.7196	8.71885
Chr1	11271503	11271701	AT1G31480_1	198,	0,	2.46005	2.18249
Chr1	11273671	11273870	AT1G31500_1	199,	0,	11.0876	9.88643
Chr1	11288526	11288677	AT1G31540_1	151,	0,	3.0251	5.27847
Chr1	11288870	11289070	AT1G31540_2	200,	0,	3.21422	5.27847
Chr1	11291143	11291343	AT1G31540_3	200,	0,	2.76484	5.27847
Chr1	11295592	11295691	AT1G31550_1	99,	0,	1.98078	15.1526
Chr1	11313158	11313407	AT1G31600_1	249,	0,	8.84234	4.43211
Chr1	11326350	11326550	AT1G31650_1	200,	0,	8.88599	10.8511
Chr1	11331072	11331172	AT1G31660_1	100,	0,	2.29661	12.5996
Chr1	11333067	11333167	AT1G31660_2	100,	0,	1.47392	12.5996
Chr1	11349892	11349991	AT1G31710_1	99,	0,	3.30974	10.4396
Chr1	11355243	11355391	AT1G31710_2	148,	0,	4.48525	10.4396
Chr1	11370778	11371021	AT1G31750_1	243,	0,	2.40288	2.20717
Chr1	11393956	11394353	AT1G31780_1	57,241,	0,156,	2.06754	15.2475
Chr1	11394549	11394649	AT1G31780_2	100,	0,	6.67775	15.2475
Chr1	11399417	11399714	AT1G31800_1	297,	0,	15.0997	73.4242
Chr1	11399656	11400005	AT1G31810_1	349,	0,	10.0926	6.33337
Chr1	11403123	11403921	AT1G31810_2	798,	0,	4.29843	6.33337
Chr1	11410960	11411204	AT1G31812_1	244,	0,	4.49844	257.803
Chr1	11418735	11418933	AT1G31830_1	198,	0,	1.95149	6.78237
Chr1	11433464	11433565	AT1G31850_1	101,	0,	6.33531	25.7499
Chr1	11434157	11434256	AT1G31860_1	99,	0,	6.07112	13.2684
Chr1	11461601	11461802	AT1G31910_1	201,	0,	10.7304	20.288
Chr1	11462000	11462151	AT1G31910_2	151,	0,	2.00666	20.288
Chr1	11466228	11466479	AT1G31930_1	251,	0,	4.35092	6.8084
Chr1	11468857	11469057	AT1G31930_2	200,	0,	5.43037	6.8084
Chr1	11470105	11470304	AT1G31940_1	199,	0,	5.36188	11.6409
Chr1	11479957	11480252	AT1G31970_1	295,	0,	6.78048	38.7826
Chr1	11482694	11482841	AT1G31970_2	147,	0,	11.1924	38.7826
Chr1	11531011	11531253	AT1G32050_1	242,	0,	17.6613	57.4098
Chr1	11532695	11532796	AT1G32060_1	101,	0,	3.47435	707.389
Chr1	11534489	11534589	AT1G32060_2	100,	0,	5.49255	707.389
Chr1	11537388	11537585	AT1G32080_1	197,	0,	5.85638	211.397
Chr1	11540092	11540293	AT1G32090_1	201,	0,	7.98708	9.14649
Chr1	11540441	11540542	AT1G32090_2	101,	0,	1.707	9.14649
Chr1	11547867	11547967	AT1G32100_1	100,	0,	4.12428	4.40543
Chr1	11558903	11559053	AT1G32130_1	150,	0,	6.41865	22.7877
Chr1	11561092	11561341	AT1G32130_2	249,	0,	6.38103	22.7877
Chr1	11570242	11570340	AT1G32160_1	98,	0,	10.6759	39.0385
Chr1	11601866	11602014	AT1G32200_1	148,	0,	17.4953	29.539
Chr1	11602110	11602307	AT1G32200_2	197,	0,	6.93855	29.539
Chr1	11605849	11606095	AT1G32210_1	246,	0,	13.7906	14.6285
Chr1	11609580	11609678	AT1G32220_1	98,	0,	7.95114	35.7816
Chr1	11615884	11616182	AT1G32230_1	298,	0,	8.76133	27.6105
Chr1	11629806	11630252	AT1G32240_1	446,	0,	3.17137	2.71775
Chr1	11640653	11640751	AT1G32260_1	98,	0,	5.69052	6.12859
Chr1	11654546	11654738	AT1G32310_1	192,	0,	12.2714	6.36632
Chr1	11663351	11663499	AT1G32340_1	148,	0,	5.01209	3.94073
Chr1	11665481	11665629	AT1G32340_2	148,	0,	1.57397	3.94073
Chr1	11673958	11674108	AT1G32360_1	150,	0,	2.82553	10.2355
Chr1	11674939	11675039	AT1G32360_2	100,	0,	1.68951	10.2355
Chr1	11675138	11675288	AT1G32360_3	150,	0,	6.96853	10.2355
Chr1	11677916	11678014	AT1G32370_1	98,	0,	2.0296	3.25095
Chr1	11684176	11684373	AT1G32380_1	197,	0,	16.9699	4.47956
Chr1	11689162	11689411	AT1G32400_1	249,	0,	8.54478	28.7026
Chr1	11695288	11695480	AT1G32410_1	192,	0,	9.75153	15.2072
Chr1	11714914	11715063	AT1G32440_1	149,	0,	9.6439	16.991
Chr1	11715294	11715393	AT1G32450_1	99,	0,	1.95234	2.81781
Chr1	11738258	11738903	AT1G32460_1	34,61,	0,584,	1.70111	11.527
Chr1	11739352	11739499	AT1G32470_1	147,	0,	3.13445	483.763
Chr1	11742104	11742402	AT1G32490_1	298,	0,	10.5717	6.42838
Chr1	11746911	11748727	AT1G32490_2	15,72,60,55,34,87,66,107,	0,243,406,768,945,1312,1541,1709,	3.81833	6.42838
Chr1	11749846	11750093	AT1G32500_1	247,	0,	12.7954	44.9292
Chr1	11759476	11759626	AT1G32530_1	150,	0,	5.08846	7.10611
Chr1	11760072	11760906	AT1G32530_2	109,140,	0,694,	3.1028	7.10611
Chr1	11761054	11761303	AT1G32530_3	249,	0,	2.32695	7.10611
Chr1	11771814	11772488	AT1G32550_1	199,45,	0,629,	14.5479	40.4977
Chr1	11784133	11784233	AT1G32580_1	100,	0,	1.88075	25.3845
Chr1	11785358	11785655	AT1G32580_2	297,	0,	8.51515	25.3845
Chr1	11827507	11827607	AT1G32700_1	100,	0,	2.3	6.70272
Chr1	11829534	11829734	AT1G32700_2	200,	0,	4.5942	6.70272
Chr1	11846296	11846447	AT1G32750_1	151,	0,	9.72478	5.74493
Chr1	11846979	11847329	AT1G32750_2	350,	0,	5.37848	5.74493
Chr1	11848649	11848983	AT1G32750_3	49,202,	0,132,	2.02679	5.74493
Chr1	11853944	11854415	AT1G32750_4	1,92,57,	0,100,414,	2.52717	5.74493
Chr1	11874997	11875194	AT1G32790_1	197,	0,	12.4678	26.4306
Chr1	11881757	11881957	AT1G32810_1	200,	0,	1.77398	5.50486
Chr1	11882503	11882603	AT1G32810_2	100,	0,	1.56325	5.50486
Chr1	11885517	11886015	AT1G32810_3	498,	0,	5.63355	5.50486
Chr1	11908302	11908452	AT1G32860_1	150,	0,	1.91716	4.45929
Chr1	11908551	11908900	AT1G32860_2	349,	0,	2.62504	4.45929
Chr1	11955847	11955943	AT1G32990_1	96,	0,	2.43149	234.632
Chr1	11957018	11957354	AT1G32990_2	336,	0,	4.41209	234.632
Chr1	11966564	11967181	AT1G33040_1	51,79,61,	0,140,556,	6.88729	42.3401
Chr1	11967700	11967796	AT1G33040_2	96,	0,	5.33244	42.3401
Chr1	11967831	11968029	AT1G33050_1	198,	0,	13.4945	6.59408
Chr1	11975406	11976144	AT1G33060_1	309,150,91,	0,422,647,	3.94929	3.12041
Chr1	12005048	12005196	AT1G33110_1	148,	0,	1.95194	8.66473
Chr1	12008607	12008803	AT1G33110_2	196,	0,	8.49665	8.66473
Chr1	12012208	12012450	AT1G33120_1	242,	0,	11.5587	74.0112
Chr1	12024496	12024735	AT1G33140_1	239,	0,	7.11224	115.509
Chr1	12029355	12029455	AT1G33170_1	100,	0,	2.08883	11.1785
Chr1	12030289	12030539	AT1G33170_2	250,	0,	4.49145	11.1785
Chr1	12049697	12049996	AT1G33230_1	299,	0,	13.286	7.8298
Chr1	12051610	12051811	AT1G33240_1	201,	0,	4.77946	19.4436
Chr1	12051959	12052110	AT1G33240_2	151,	0,	2.43547	19.4436
Chr1	12052459	12052560	AT1G33240_3	101,	0,	3.21222	19.4436
Chr1	12052659	12052860	AT1G33240_4	201,	0,	3.35665	19.4436
Chr1	12053358	12053509	AT1G33240_5	151,	0,	3.53977	19.4436
Chr1	12057296	12057543	AT1G33250_1	247,	0,	6.50203	5.99703
Chr1	12059051	12059299	AT1G33250_2	248,	0,	2.18391	5.99703
Chr1	12067806	12068052	AT1G33265_1	246,	0,	11.7333	12.3098
Chr1	12068162	12068411	AT1G33270_1	249,	0,	9.91428	8.94102
Chr1	12075792	12076093	AT1G33290_1	21,176,	0,125,	9.7583	20.362
Chr1	12086304	12086504	AT1G33330_1	200,	0,	13.5873	11.9093
Chr1	12091929	12092030	AT1G33360_1	101,	0,	2.27149	4.18843
Chr1	12095454	12096036	AT1G33360_2	161,289,	0,293,	4.00621	4.18843
Chr1	12109659	12109964	AT1G33410_1	154,45,	0,260,	12.5304	7.22653
Chr1	12120935	12121035	AT1G33420_1	100,	0,	4.92551	3.87456
Chr1	12121282	12121383	AT1G33420_2	101,	0,	1.57499	3.87456
Chr1	12148661	12148859	AT1G33480_1	198,	0,	4.62917	3.72747
Chr1	12150723	12150922	AT1G33490_1	199,	0,	8.15213	9.41198
Chr1	12157152	12157251	AT1G33520_1	99,	0,	6.52604	13.2603
Chr1	12157743	12158435	AT1G33520_2	692,	0,	6.4842	13.2603
Chr1	12204686	12204786	AT1G33680_1	100,	0,	2.61135	14.3786
Chr1	12208351	12208599	AT1G33680_2	248,	0,	11.243	14.3786
Chr1	12266629	12266775	AT1G33810_1	146,	0,	12.2304	50.9892
Chr1	12326560	12327213	AT1G33930_1	27,132,285,	0,132,368,	3.54707	2.61606
Chr1	12349549	12349747	AT1G33970_1	198,	0,	2.26237	14.5737
Chr1	12357832	12358031	AT1G33990_1	199,	0,	11.0628	16.7163
Chr1	12357957	12358249	AT1G34000_1	292,	0,	4.40852	92.5137
Chr1	12359549	12359790	AT1G34010_1	241,	0,	6.49421	11.0499
Chr1	12359885	12360547	AT1G34010_2	5,188,	0,474,	1.81081	11.0499
Chr1	12369001	12369151	AT1G34020_1	150,	0,	14.4962	5.86513
Chr1	12370160	12370305	AT1G34030_1	145,	0,	7.46935	108.308
Chr1	12419223	12419323	AT1G34110_2	100,	0,	1.71452	2.36986
Chr1	12428958	12429226	AT1G34120_1	30,120,	0,148,	1.39467	2.66532
Chr1	12432890	12433137	AT1G34130_1	247,	0,	10.813	18.0926
Chr1	12439062	12439353	AT1G34150_1	13,184,	0,107,	2.99683	3.65184
Chr1	12453947	12454047	AT1G34190_1	100,	0,	9.96531	13.8034
Chr1	12455799	12456044	AT1G34200_1	245,	0,	2.68858	3.72688
Chr1	12462659	12462905	AT1G34210_1	246,	0,	9.93925	5.82014
Chr1	12462898	12463097	AT1G34220_1	199,	0,	4.4022	7.97163
Chr1	12530913	12531064	AT1G34340_1	151,	0,	2.42463	5.86525
Chr1	12533858	12534256	AT1G34340_2	398,	0,	5.9398	5.86525
Chr1	12535921	12536066	AT1G34350_1	145,	0,	6.18993	6.29574
Chr1	12545550	12546195	AT1G34360_1	645,	0,	4.64124	4.08013
Chr1	12552704	12553010	AT1G34380_1	234,16,	0,290,	3.75239	9.02366
Chr1	12587824	12588024	AT1G34430_1	200,	0,	17.6226	53.1104
Chr1	12606733	12606933	AT1G34470_1	200,	0,	9.80971	5.22801
Chr1	12646722	12646920	AT1G34550_1	198,	0,	6.07544	10.5543
Chr1	12650039	12650385	AT1G34550_2	346,	0,	2.4631	10.5543
Chr1	12650857	12651055	AT1G34550_3	198,	0,	1.54151	10.5543
Chr1	12655071	12655168	AT1G34570_1	97,	0,	7.59025	15.0784
Chr1	12736148	12736446	AT1G34750_1	298,	0,	3.45062	9.38693
Chr1	12748283	12748568	AT1G34770_1	36,161,	0,124,	4.42956	2.72762
Chr1	12748619	12748818	AT1G34780_1	199,	0,	8.95841	7.6813
Chr1	12868490	12868740	AT1G35160_1	250,	0,	11.1415	50.0373
Chr1	12914510	12914759	AT1G35220_1	249,	0,	15.7692	5.06506
Chr1	12977814	12977963	AT1G35340_1	149,	0,	1.67473	25.6739
Chr1	12979700	12979898	AT1G35340_2	198,	0,	3.60426	25.6739
Chr1	13041865	13042061	AT1G35460_1	196,	0,	6.44768	5.14311
Chr1	13051449	13051695	AT1G35470_1	246,	0,	9.54265	5.34308
Chr1	13074635	13074934	AT1G35510_1	299,	0,	5.6087	9.04945
Chr1	13122328	13122526	AT1G35580_1	198,	0,	8.79475	21.0183
Chr1	13208830	13208930	AT1G35680_1	100,	0,	1.56092	382.408
Chr1	13210180	13210379	AT1G35680_2	199,	0,	5.93402	382.408
Chr1	13277554	13277802	AT1G35780_1	248,	0,	6.30799	8.1349
Chr1	13452993	13453240	AT1G36050_1	247,	0,	13.429	11.9542
Chr1	13470126	13470276	AT1G36070_3	150,	0,	2.09238	2.52957
Chr1	13642726	13643026	AT1G36280_1	300,	0,	2.57711	7.02736
Chr1	13670862	13671106	AT1G36310_1	244,	0,	6.73578	16.8049
Chr1	13673862	13674058	AT1G36320_1	196,	0,	11.311	33.3295
Chr1	13701483	13701583	AT1G36380_1	100,	0,	2.21204	5.11698
Chr1	13701711	13701811	AT1G36390_1	100,	0,	5.9015	28.3393
Chr1	13703146	13703524	AT1G36390_2	118,180,	0,198,	2.53818	28.3393
Chr1	14026743	14026941	AT1G36980_1	198,	0,	13.206	32.3431
Chr1	14027369	14027665	AT1G36990_1	296,	0,	7.13729	6.81811
Chr1	15603715	15603912	AT1G41830_1	197,	0,	5.02069	54.6206
Chr1	15651081	15651280	AT1G41880_1	199,	0,	4.01503	85.0671
Chr1	15652281	15652492	AT1G41880_2	6,94,	0,117,	1.69677	85.0671
Chr1	15892295	15893734	AT1G42430_1	155,40,82,78,126,109,	0,386,661,848,1041,1330,	2.7822	12.1492
Chr1	15894281	15894478	AT1G42430_2	197,	0,	7.73409	12.1492
Chr1	15895345	15895594	AT1G42440_1	249,	0,	15.0541	10.4726
Chr1	15935030	15935280	AT1G42470_1	250,	0,	10.265	4.55755
Chr1	15938364	15938924	AT1G42480_1	25,92,281,	0,106,279,	5.73995	12.9617
Chr1	15976613	15976714	AT1G42540_1	101,	0,	14.2862	4.51709
Chr1	15977449	15977549	AT1G42550_1	100,	0,	1.90417	45.3599
Chr1	15977846	15977995	AT1G42550_2	149,	0,	2.61885	45.3599
Chr1	15979009	15979208	AT1G42550_3	199,	0,	2.91158	45.3599
Chr1	15979405	15979803	AT1G42550_4	398,	0,	7.15369	45.3599
Chr1	16125841	16126239	AT1G42960_1	88,13,	0,385,	2.23791	111.73
Chr1	16127049	16127248	AT1G42960_2	199,	0,	7.61034	111.73
Chr1	16135919	16136117	AT1G42990_1	198,	0,	3.2199	15.3255
Chr1	16136411	16137069	AT1G42990_2	101,47,	0,611,	4.05343	15.3255
Chr1	16228484	16228871	AT1G43130_1	289,9,	0,378,	10.4441	8.25464
Chr1	16275255	16275501	AT1G43190_1	246,	0,	10.3377	25.2997
Chr1	16398175	16398422	AT1G43560_1	247,	0,	10.0356	79.6718
Chr1	16410570	16410869	AT1G43580_1	299,	0,	4.39755	10.8609
Chr1	16425510	16425659	AT1G43620_1	149,	0,	14.8798	9.5102
Chr1	16470302	16470451	AT1G43670_1	149,	0,	4.43603	129.513
Chr1	16482511	16482760	AT1G43690_1	249,	0,	6.3399	17.5381
Chr1	16484521	16484619	AT1G43700_1	98,	0,	2.76229	11.7965
Chr1	16485986	16486230	AT1G43700_2	244,	0,	9.40236	11.7965
Chr1	16577669	16577769	AT1G43800_1	100,	0,	2.23101	11.5932
Chr1	16618637	16618736	AT1G43850_1	99,	0,	2.13273	8.79477
Chr1	16620715	16620913	AT1G43850_2	198,	0,	2.48375	8.79477
Chr1	16621307	16622000	AT1G43850_3	693,	0,	3.53692	8.79477
Chr1	16620817	16620917	AT1G43860_1	100,	0,	2.46827	3.31863
Chr1	16621509	16622005	AT1G43860_2	496,	0,	4.56412	3.31863
Chr1	16622103	16622499	AT1G43860_3	396,	0,	5.53931	3.31863
Chr1	16648400	16648596	AT1G43890_1	196,	0,	11.7336	26.5875
Chr1	16654129	16654230	AT1G43900_1	101,	0,	2.86002	16.6876
Chr1	16655727	16655878	AT1G43900_2	151,	0,	7.69176	16.6876
Chr1	16708149	16708248	AT1G44000_1	99,	0,	5.6079	42.7297
Chr1	16796498	16796598	AT1G44170_1	100,	0,	13.9017	19.2332
Chr1	16848455	16848653	AT1G44446_1	198,	0,	4.74076	15.9211
Chr1	16873133	16873280	AT1G44575_1	147,	0,	6.6267	787.988
Chr1	16895082	16895378	AT1G44750_1	296,	0,	5.19415	6.73899
Chr1	16907634	16907782	AT1G44770_1	148,	0,	13.3248	10.7497
Chr1	16911794	16912270	AT1G44780_1	158,242,	0,234,	14.9828	2.58914
Chr1	16912202	16912399	AT1G44790_1	197,	0,	15.5724	19.2455
Chr1	16924228	16924476	AT1G44810_1	248,	0,	4.18179	12.3897
Chr1	16926394	16926690	AT1G44820_1	296,	0,	3.76397	7.94012
Chr1	16928359	16928606	AT1G44820_2	247,	0,	8.09325	7.94012
Chr1	16942265	16942461	AT1G44835_1	196,	0,	11.8391	12.945
Chr1	16970312	16970512	AT1G44900_1	200,	0,	1.66506	6.43995
Chr1	16974404	16974604	AT1G44900_2	200,	0,	5.46324	6.43995
Chr1	16981985	16982965	AT1G44910_1	44,103,344,258,	0,145,332,722,	10.9729	7.36845
Chr1	16982952	16983250	AT1G44920_1	298,	0,	7.55723	57.0624
Chr1	16984245	16984345	AT1G44920_2	100,	0,	2.94231	57.0624
Chr1	17001541	17001734	AT1G44960_1	193,	0,	4.54158	7.98018
Chr1	17011580	17011730	AT1G45000_1	150,	0,	6.91845	47.141
Chr1	17032972	17033170	AT1G45050_1	198,	0,	11.8915	5.63585
Chr1	17068834	17069219	AT1G45130_1	77,221,	0,164,	6.89724	10.1374
Chr1	17075138	17075287	AT1G45145_1	149,	0,	3.75168	14.4382
Chr1	17077484	17077732	AT1G45150_1	248,	0,	9.95541	3.40758
Chr1	17083570	17083818	AT1G45160_1	248,	0,	10.5128	9.79651
Chr1	17090389	17090489	AT1G45160_2	100,	0,	2.28606	9.79651
Chr1	17096028	17096273	AT1G45170_1	245,	0,	7.37802	6.71864
Chr1	17119048	17119147	AT1G45191_1	99,	0,	2.24928	6.58784
Chr1	17130399	17130697	AT1G45207_1	298,	0,	7.41208	6.42509
Chr1	17133461	17133660	AT1G45207_2	199,	0,	2.38946	6.42509
Chr1	17169584	17169883	AT1G45230_1	299,	0,	7.56365	45.062
Chr1	17165223	17165808	AT1G45249_1	271,30,98,	0,377,487,	3.89836	8.90046
Chr1	17172269	17172568	AT1G45332_1	299,	0,	9.12384	5.17206
Chr1	17180392	17180490	AT1G45474_1	98,	0,	8.59959	117.211
Chr1	17191460	17191610	AT1G45688_1	150,	0,	2.29625	40.611
Chr1	17192668	17192868	AT1G45688_2	200,	0,	1.97872	40.611
Chr1	17193015	17193116	AT1G45688_3	101,	0,	2.86843	40.611
Chr1	17200292	17200393	AT1G45976_1	101,	0,	1.47888	8.13955
Chr1	17200491	17200692	AT1G45976_2	201,	0,	4.58749	8.13955
Chr1	17225845	17225995	AT1G46264_1	150,	0,	1.71577	3.95213
Chr1	17236971	17237121	AT1G46480_1	150,	0,	2.94844	2.33886
Chr1	17237736	17237887	AT1G46480_2	151,	0,	2.48509	2.33886
Chr1	17298079	17298180	AT1G47200_1	101,	0,	15.1004	25.2922
Chr1	17298628	17298729	AT1G47200_2	101,	0,	3.54518	25.2922
Chr1	17308851	17309100	AT1G47240_1	249,	0,	6.23304	7.00083
Chr1	17320855	17321202	AT1G47250_1	347,	0,	10.1535	4.53171
Chr1	17320879	17321471	AT1G47260_1	592,	0,	8.23739	28.4509
Chr1	17331710	17332000	AT1G47278_1	290,	0,	4.88253	10.0949
Chr1	17339030	17339226	AT1G47290_1	196,	0,	18.6264	8.34404
Chr1	17344330	17344778	AT1G47310_1	448,	0,	3.83818	6.4087
Chr1	17352959	17353138	AT1G47330_1	83,16,	0,163,	1.63658	4.83159
Chr1	17353577	17353875	AT1G47330_2	298,	0,	7.91481	4.83159
Chr1	17372568	17372866	AT1G47380_1	298,	0,	14.3225	5.96418
Chr1	17395575	17395673	AT1G47410_1	98,	0,	11.4266	2.81466
Chr1	17395566	17395809	AT1G47420_1	243,	0,	5.02506	68.2215
Chr1	17427226	17427425	AT1G47490_1	199,	0,	15.9437	24.3678
Chr1	17434830	17435026	AT1G47500_1	196,	0,	15.3943	13.4408
Chr1	17454115	17454313	AT1G47530_1	198,	0,	10.7924	25.1031
Chr1	17463794	17464045	AT1G47550_1	251,	0,	14.8776	10.1135
Chr1	17483155	17483354	AT1G47570_1	199,	0,	6.49028	4.42703
Chr1	17518243	17518440	AT1G47640_1	197,	0,	12.8043	19.6033
Chr1	17558308	17558454	AT1G47710_1	146,	0,	2.11987	17.6173
Chr1	17560087	17560234	AT1G47710_2	147,	0,	20.4888	17.6173
Chr1	17566659	17566759	AT1G47740_1	100,	0,	2.13038	10.6536
Chr1	17568998	17569297	AT1G47740_2	299,	0,	10.2378	10.6536
Chr1	17569553	17569653	AT1G47750_1	100,	0,	2.11925	6.74235
Chr1	17612376	17612471	AT1G47820_1	95,	0,	1.6315	3.69588
Chr1	17613078	17613378	AT1G47830_1	300,	0,	12.0019	18.0994
Chr1	17634894	17635142	AT1G47870_1	248,	0,	3.30031	4.79372
Chr1	17647243	17647393	AT1G47900_1	150,	0,	16.3839	6.08747
Chr1	17651491	17651641	AT1G47900_2	150,	0,	3.48341	6.08747
Chr1	17687437	17688710	AT1G47970_1	258,391,	0,882,	7.55341	53.4836
Chr1	17719829	17720077	AT1G48040_1	248,	0,	5.96187	4.9489
Chr1	17726370	17726470	AT1G48050_1	100,	0,	2.60815	5.40156
Chr1	17726698	17726996	AT1G48050_2	298,	0,	11.4193	5.40156
Chr1	17732059	17732422	AT1G48090_1	202,49,	0,314,	16.5814	5.7857
Chr1	17770036	17770336	AT1G48110_1	300,	0,	10.6822	12.2952
Chr1	17783668	17784063	AT1G48140_1	40,209,	0,186,	10.7666	7.95187
Chr1	17786596	17786796	AT1G48160_1	200,	0,	14.5618	16.5104
Chr1	17789613	17789905	AT1G48170_1	292,	0,	8.89131	4.223
Chr1	17792097	17792340	AT1G48175_1	243,	0,	8.12551	3.14351
Chr1	17796859	17797100	AT1G48200_1	241,	0,	4.43557	8.43945
Chr1	17801786	17801985	AT1G48210_1	199,	0,	9.85143	22.0608
Chr1	17808543	17808893	AT1G48230_1	350,	0,	9.99059	14.3657
Chr1	17809086	17809186	AT1G48240_1	100,	0,	4.05832	11.6521
Chr1	17835474	17835623	AT1G48280_1	149,	0,	2.28397	2.32491
Chr1	17837534	17837683	AT1G48280_2	149,	0,	5.20857	2.32491
Chr1	17848469	17848766	AT1G48310_1	297,	0,	2.32544	4.88687
Chr1	17855569	17855715	AT1G48320_1	146,	0,	3.82336	7.11584
Chr1	17868182	17868332	AT1G48350_1	150,	0,	5.2689	158.962
Chr1	17874582	17874780	AT1G48370_1	198,	0,	3.10423	4.20371
Chr1	17878924	17879171	AT1G48380_2	247,	0,	2.88238	3.63432
Chr1	17886160	17886360	AT1G48410_1	200,	0,	11.3456	34.0682
Chr1	17896639	17896839	AT1G48420_1	200,	0,	14.0288	24.4321
Chr1	17902680	17902928	AT1G48430_1	248,	0,	8.70336	11.4405
Chr1	17908345	17908487	AT1G48440_1	142,	0,	9.30486	50.4982
Chr1	17908651	17908752	AT1G48450_1	101,	0,	9.10148	61.4075
Chr1	17911511	17911792	AT1G48460_1	47,43,9,	0,142,272,	1.8092	7.7046
Chr1	17913099	17913344	AT1G48460_2	245,	0,	9.37448	7.7046
Chr1	17942515	17942765	AT1G48520_1	250,	0,	10.4243	24.8933
Chr1	17950617	17950812	AT1G48550_1	195,	0,	8.02718	4.35178
Chr1	17955152	17955548	AT1G48570_1	396,	0,	8.25682	9.24952
Chr1	17968868	17969304	AT1G48600_1	23,326,	0,110,	6.20859	70.9082
Chr1	17970759	17971106	AT1G48610_1	347,	0,	8.80671	12.1265
Chr1	17973837	17974280	AT1G48620_1	443,	0,	3.45945	20.8899
Chr1	17976073	17976319	AT1G48620_2	246,	0,	4.26704	20.8899
Chr1	17985845	17986143	AT1G48635_1	298,	0,	8.7492	6.23346
Chr1	18036664	18036964	AT1G48760_1	300,	0,	4.41148	3.80671
Chr1	18040520	18040619	AT1G48770_1	99,	0,	3.06231	3.02562
Chr1	18043769	18043966	AT1G48790_1	197,	0,	10.279	12.6524
Chr1	18059695	18059893	AT1G48830_1	198,	0,	7.39236	65.9603
Chr1	18064781	18065031	AT1G48840_1	250,	0,	13.2637	2.45564
Chr1	18065051	18065198	AT1G48850_1	147,	0,	9.63189	29.9247
Chr1	18067859	18068007	AT1G48850_2	148,	0,	2.51591	29.9247
Chr1	18068796	18068994	AT1G48860_1	198,	0,	10.5327	17.253
Chr1	18071271	18071371	AT1G48860_2	100,	0,	2.38413	17.253
Chr1	18084813	18085062	AT1G48900_1	249,	0,	9.52988	20.7019
Chr1	18085161	18085403	AT1G48900_2	139,10,	0,232,	2.24473	20.7019
Chr1	18101082	18101483	AT1G48920_1	209,90,	0,311,	4.92939	165.744
Chr1	18109203	18109302	AT1G48950_1	99,	0,	2.11782	5.23772
Chr1	18110040	18110337	AT1G48950_2	297,	0,	14.3329	5.23772
Chr1	18113535	18113733	AT1G48960_1	198,	0,	6.63615	5.33245
Chr1	18113762	18114061	AT1G48970_1	168,31,	0,268,	7.45764	7.11192
Chr1	18115575	18115769	AT1G48970_2	13,87,	0,107,	2.20332	7.11192
Chr1	18117337	18117437	AT1G48970_3	100,	0,	1.70244	7.11192
Chr1	18132737	18132835	AT1G49010_1	98,	0,	6.00645	19.8274
Chr1	18139322	18139473	AT1G49040_1	151,	0,	6.03319	9.44791
Chr1	18150612	18150859	AT1G49050_1	247,	0,	2.26619	6.04478
Chr1	18153117	18153315	AT1G49050_2	198,	0,	11.5644	6.04478
Chr1	18174812	18175363	AT1G49130_1	108,332,	0,219,	2.50167	2.01596
Chr1	18175460	18175559	AT1G49130_2	99,	0,	2.06826	2.01596
Chr1	18176820	18177677	AT1G49140_1	193,6,	0,851,	4.36281	16.5569
Chr1	18178174	18178274	AT1G49140_2	100,	0,	1.94219	16.5569
Chr1	18217997	18218241	AT1G49240_1	244,	0,	5.23544	71.0448
Chr1	18236960	18237155	AT1G49300_1	195,	0,	15.1047	23.3824
Chr1	18263921	18264422	AT1G49340_1	501,	0,	16.4657	9.59572
Chr1	18266875	18267220	AT1G49350_1	3,248,	0,97,	5.8574	3.35481
Chr1	18279136	18279433	AT1G49380_1	297,	0,	13.5318	29.1121
Chr1	18283916	18284155	AT1G49400_1	239,	0,	11.0747	12.3647
Chr1	18285547	18285741	AT1G49410_1	194,	0,	15.7762	28.2359
Chr1	18295608	18295757	AT1G49430_1	149,	0,	6.42578	12.1182
Chr1	18310724	18310824	AT1G49470_1	100,	0,	1.61809	7.31518
Chr1	18314215	18314562	AT1G49480_1	347,	0,	8.41046	16.0624
Chr1	18317719	18317869	AT1G49490_1	150,	0,	1.3708	2.15085
Chr1	18317968	18318565	AT1G49490_2	597,	0,	3.55472	2.15085
Chr1	18328420	18328665	AT1G49510_1	245,	0,	6.49364	16.08
Chr1	18330771	18330918	AT1G49520_1	147,	0,	4.71828	1.71853
Chr1	18344158	18344306	AT1G49560_1	148,	0,	9.75305	8.19167
Chr1	18351470	18351570	AT1G49580_1	100,	0,	2.68155	11.7066
Chr1	18351961	18352061	AT1G49580_2	100,	0,	1.74494	11.7066
Chr1	18354338	18354585	AT1G49580_3	247,	0,	8.8074	11.7066
Chr1	18356341	18356684	AT1G49590_1	343,	0,	6.14837	7.45844
Chr1	18356948	18357199	AT1G49600_1	251,	0,	15.0547	38.1186
Chr1	18359947	18360347	AT1G49600_2	400,	0,	2.83703	38.1186
Chr1	18365624	18365963	AT1G49620_1	339,	0,	2.77691	2.84286
Chr1	18377301	18377697	AT1G49650_1	396,	0,	1.90484	9.77836
Chr1	18378288	18378486	AT1G49650_2	198,	0,	2.26094	9.77836
Chr1	18381347	18381596	AT1G49670_1	249,	0,	8.36505	15.9537
Chr1	18391370	18391762	AT1G49710_1	392,	0,	6.46041	6.81931
Chr1	18393736	18393834	AT1G49710_2	98,	0,	1.93258	6.81931
Chr1	18402332	18402628	AT1G49720_1	296,	0,	10.1625	10.7492
Chr1	18402554	18402703	AT1G49730_1	149,	0,	7.77924	7.0051
Chr1	18409482	18409679	AT1G49740_1	197,	0,	4.89528	12.9728
Chr1	18412418	18412767	AT1G49750_1	349,	0,	4.45649	300.666
Chr1	18419712	18420011	AT1G49760_1	299,	0,	7.70582	48.6454
Chr1	18444904	18445054	AT1G49820_1	150,	0,	10.6666	11.978
Chr1	18455183	18455378	AT1G49850_1	195,	0,	4.23653	5.22175
Chr1	18465841	18465939	AT1G49880_1	98,	0,	5.59162	3.71294
Chr1	18470393	18470543	AT1G49890_1	150,	0,	3.25363	7.1556
Chr1	18473583	18473783	AT1G49890_2	200,	0,	6.93105	7.1556
Chr1	18494178	18494586	AT1G49950_1	275,25,	0,383,	5.26085	11.3831
Chr1	18501815	18501963	AT1G49970_1	148,	0,	14.0403	99.2525
Chr1	18505347	18505495	AT1G49975_1	148,	0,	4.06927	28.3361
Chr1	18515107	18515304	AT1G50000_1	197,	0,	10.3669	4.68347
Chr1	18519654	18519901	AT1G50010_1	247,	0,	4.66116	165.495
Chr1	18558082	18558281	AT1G50110_1	199,	0,	8.82454	5.84962
Chr1	18564161	18564387	AT1G50120_1	65,35,	0,191,	1.77624	8.01405
Chr1	18565923	18566121	AT1G50120_2	198,	0,	9.48733	8.01405
Chr1	18583541	18583784	AT1G50170_1	243,	0,	5.73422	13.7415
Chr1	18591292	18591492	AT1G50200_1	200,	0,	7.2816	47.732
Chr1	18614004	18614500	AT1G50240_1	496,	0,	4.67358	2.45628
Chr1	18628654	18629732	AT1G50300_1	360,124,65,	0,776,1013,	4.96818	7.72664
Chr1	18638482	18638632	AT1G50320_1	150,	0,	8.07247	150.359
Chr1	18656903	18657350	AT1G50360_1	447,	0,	5.68848	4.51074
Chr1	18661755	18661904	AT1G50370_1	149,	0,	11.0581	19.808
Chr1	18666217	18666465	AT1G50380_1	248,	0,	10.6952	10.0911
Chr1	18677402	18677503	AT1G50410_1	101,	0,	16.0215	4.96904
Chr1	18682030	18682371	AT1G50430_1	211,38,	0,303,	12.7911	41.1681
Chr1	18687561	18687907	AT1G50440_1	346,	0,	7.49349	11.3418
Chr1	18687833	18688077	AT1G50450_1	126,21,	0,223,	4.92654	40.8217
Chr1	18694089	18694238	AT1G50460_1	149,	0,	2.01187	9.0023
Chr1	18697114	18697313	AT1G50460_2	199,	0,	2.58422	9.0023
Chr1	18697411	18697610	AT1G50460_3	199,	0,	2.36587	9.0023
Chr1	18708022	18708270	AT1G50500_1	248,	0,	9.97217	7.65123
Chr1	18718820	18719187	AT1G50510_1	1,198,	0,169,	4.09825	7.92259
Chr1	18728681	18728971	AT1G50575_1	290,	0,	9.54138	10.3152
Chr1	18737211	18737462	AT1G50600_1	251,	0,	2.94865	8.41445
Chr1	18738707	18738857	AT1G50600_2	150,	0,	2.13513	8.41445
Chr1	18750893	18751338	AT1G50620_1	445,	0,	4.52409	4.15654
Chr1	18773135	18773382	AT1G50660_1	247,	0,	2.82671	15.0256
Chr1	18774020	18774169	AT1G50660_2	149,	0,	1.70437	15.0256
Chr1	18774463	18774661	AT1G50660_3	198,	0,	7.865	15.0256
Chr1	18774901	18775226	AT1G50670_1	241,4,	0,321,	8.93987	19.9897
Chr1	18784557	18784754	AT1G50710_1	197,	0,	18.7692	7.86556
Chr1	18802022	18802320	AT1G50730_1	298,	0,	12.3769	4.00017
Chr1	18803313	18803412	AT1G50732_1	99,	0,	2.06035	12.0541
Chr1	18808793	18808939	AT1G50740_1	146,	0,	3.74188	6.48275
Chr1	18839296	18839811	AT1G50840_1	132,19,	0,496,	1.7624	11.1402
Chr1	18844276	18844527	AT1G50840_2	251,	0,	9.44926	11.1402
Chr1	18877861	18878060	AT1G50940_1	199,	0,	12.3256	6.59211
Chr1	18929514	18929663	AT1G51070_1	149,	0,	11.2298	21.3817
Chr1	18929986	18930229	AT1G51080_1	243,	0,	8.67526	8.85488
Chr1	18934393	18934680	AT1G51100_1	287,	0,	3.62115	26.1255
Chr1	18934774	18934870	AT1G51100_2	96,	0,	2.05856	26.1255
Chr1	18937416	18937615	AT1G51110_1	199,	0,	9.39956	50.076
Chr1	18943546	18943796	AT1G51140_1	250,	0,	6.51936	32.016
Chr1	18951549	18951793	AT1G51160_1	244,	0,	13.5587	18.9755
Chr1	18954603	18954854	AT1G51170_1	251,	0,	2.01187	4.58793
Chr1	18986304	18986504	AT1G51200_1	200,	0,	5.66398	89.8042
Chr1	19010495	19010693	AT1G51270_1	198,	0,	3.4157	2.45938
Chr1	19018989	19019186	AT1G51310_1	197,	0,	8.9355	9.55215
Chr1	19021513	19021710	AT1G51310_2	197,	0,	2.91963	9.55215
Chr1	19035791	19035988	AT1G51350_1	197,	0,	2.94988	9.03213
Chr1	19038695	19039349	AT1G51350_2	219,176,	0,478,	2.15139	9.03213
Chr1	19051744	19052094	AT1G51390_1	350,	0,	1.41901	5.63211
Chr1	19058808	19059035	AT1G51405_2	52,95,	0,132,	2.23314	1.33555
Chr1	19075018	19075216	AT1G51450_1	198,	0,	1.70905	4.33361
Chr1	19075314	19075513	AT1G51450_2	199,	0,	2.0152	4.33361
Chr1	19102887	19103083	AT1G51510_1	196,	0,	16.2173	46.0299
Chr1	19117334	19117534	AT1G51540_1	200,	0,	2.95398	4.97379
Chr1	19117350	19117647	AT1G51550_1	297,	0,	3.47247	2.14659
Chr1	19119751	19119897	AT1G51560_1	146,	0,	11.894	12.1296
Chr1	19122259	19122359	AT1G51570_1	100,	0,	2.83078	38.3016
Chr1	19125924	19126120	AT1G51580_1	196,	0,	2.53009	9.77196
Chr1	19128062	19128161	AT1G51580_2	99,	0,	14.879	9.77196
Chr1	19128193	19128442	AT1G51590_1	249,	0,	17.1921	14.0677
Chr1	19136458	19136556	AT1G51610_1	98,	0,	3.00704	14.5035
Chr1	19139548	19139891	AT1G51610_2	343,	0,	6.39149	14.5035
Chr1	19141970	19142169	AT1G51630_1	199,	0,	4.94022	16.3616
Chr1	19144023	19144122	AT1G51630_2	99,	0,	1.40392	16.3616
Chr1	19153653	19153902	AT1G51650_1	249,	0,	7.51506	75.9477
Chr1	19161048	19161344	AT1G51680_1	296,	0,	2.88107	30.8413
Chr1	19170101	19170399	AT1G51690_1	298,	0,	12.1978	9.28478
Chr1	19175707	19175858	AT1G51710_1	151,	0,	11.8896	23.2847
Chr1	19186284	19186483	AT1G51720_1	199,	0,	14.4258	7.753
Chr1	19186537	19186838	AT1G51730_1	301,	0,	10.0458	22.4424
Chr1	19187025	19187212	AT1G51730_2	30,71,	0,116,	2.36794	22.4424
Chr1	19191074	19191273	AT1G51740_1	199,	0,	10.9756	4.94986
Chr1	19193912	19194013	AT1G51745_1	101,	0,	1.61505	4.99172
Chr1	19194509	19194759	AT1G51745_2	250,	0,	10.3883	4.99172
Chr1	19201362	19201511	AT1G51760_1	149,	0,	8.0122	12.6399
Chr1	19295917	19296164	AT1G51940_1	247,	0,	11.8724	14.2927
Chr1	19298824	19299120	AT1G51940_2	296,	0,	2.5601	14.2927
Chr1	19323453	19323704	AT1G51980_1	251,	0,	12.7484	65.1227
[truncated: 10,957 more rows]

## Sheet: F1LC
Chr	Start	End	Peak_ID	Block_sizes	Block_starts	Enrichment	Gene expression (FPKM)
Chr1	6836	7317	AT1G01020_1	233,161,	0,320,	8.0092	3.92094
Chr1	23867	24317	AT1G01040_1	450,	0,	4.23434	6.07911
Chr1	30643	31127	AT1G01040_2	173,226,	0,258,	2.51931	6.07911
Chr1	31266	31413	AT1G01050_1	147,	0,	4.57702	52.3493
Chr1	45363	45561	AT1G01080_1	198,	0,	6.76638	44.3169
Chr1	46418	46517	AT1G01080_2	99,	0,	1.3199	44.3169
Chr1	46615	46813	AT1G01080_3	198,	0,	4.21613	44.3169
Chr1	50145	50336	AT1G01100_1	191,	0,	8.42176	227.797
Chr1	64214	64459	AT1G01140_1	245,	0,	5.72495	26.2368
Chr1	73715	74096	AT1G01160_1	25,275,	0,106,	9.37992	12.2961
Chr1	73977	74118	AT1G01170_1	141,	0,	10.3589	45.9232
Chr1	89594	90207	AT1G01210_1	151,46,	0,567,	6.09348	6.77506
Chr1	95482	95681	AT1G01220_1	199,	0,	9.56562	8.62902
Chr1	99045	99191	AT1G01230_1	146,	0,	5.14654	13.777
Chr1	137963	138113	AT1G01350_1	150,	0,	6.691	8.88218
Chr1	148414	148564	AT1G01390_1	150,	0,	3.79959	3.88359
Chr1	154638	154835	AT1G01420_1	197,	0,	2.90064	3.64492
Chr1	155814	155913	AT1G01420_2	99,	0,	1.71411	3.64492
Chr1	159875	159975	AT1G01440_1	100,	0,	8.35524	5.11425
Chr1	172797	172948	AT1G01470_1	151,	0,	2.80978	34.2666
Chr1	180265	180713	AT1G01490_1	448,	0,	7.85147	12.3973
Chr1	189824	190124	AT1G01510_1	300,	0,	9.72074	9.1771
Chr1	198341	198639	AT1G01540_1	298,	0,	7.31675	33.4874
Chr1	222738	222935	AT1G01610_1	197,	0,	2.6392	33.8691
Chr1	232939	233238	AT1G01650_1	299,	0,	15.4306	11.2153
Chr1	265983	266178	AT1G01710_1	195,	0,	23.0364	11.9053
Chr1	269840	269987	AT1G01725_1	147,	0,	5.71544	3.97707
Chr1	271889	272089	AT1G01730_1	200,	0,	5.20521	8.8184
Chr1	283997	284196	AT1G01780_1	199,	0,	9.56846	5.66727
Chr1	290902	291103	AT1G01790_1	201,	0,	21.3367	53.2199
Chr1	296049	296195	AT1G01820_1	146,	0,	17.4203	27.5492
Chr1	298650	298950	AT1G01830_1	300,	0,	2.77613	7.62011
Chr1	304164	304261	AT1G01840_1	97,	0,	12.475	1.64414
Chr1	304181	304281	AT1G01860_1	100,	0,	6.54587	6.02434
Chr1	313198	313593	AT1G01910_1	395,	0,	7.23645	18.8175
Chr1	319419	319618	AT1G01920_1	199,	0,	10.8768	4.93901
Chr1	319866	320398	AT1G01930_1	279,45,19,	0,385,513,	3.82902	5.11828
Chr1	324673	324868	AT1G01940_1	195,	0,	13.9972	10.7639
Chr1	330322	330471	AT1G01950_1	149,	0,	8.5881	6.31644
Chr1	330637	330837	AT1G01960_1	200,	0,	12.5813	16.1313
Chr1	343312	343412	AT1G01990_1	100,	0,	2.89367	8.54557
Chr1	343905	344104	AT1G01990_2	199,	0,	2.09229	8.54557
Chr1	352710	352908	AT1G02020_1	198,	0,	6.35976	5.68098
Chr1	354286	354533	AT1G02020_2	247,	0,	3.31068	5.68098
Chr1	386612	386763	AT1G02080_1	151,	0,	13.6998	12.887
Chr1	387325	387701	AT1G02090_1	178,118,	0,258,	7.68682	14.1533
Chr1	392419	392816	AT1G02100_1	397,	0,	13.9541	12.2412
Chr1	393076	393471	AT1G02110_1	395,	0,	1.97426	8.70624
Chr1	395035	395134	AT1G02110_2	99,	0,	1.51978	8.70624
Chr1	395281	395528	AT1G02110_3	247,	0,	8.15512	8.70624
Chr1	399105	399952	AT1G02120_1	5,212,469,	0,76,378,	6.21756	29.8062
Chr1	400127	400369	AT1G02130_1	242,	0,	11.8343	18.4567
Chr1	403245	403440	AT1G02140_1	195,	0,	10.5348	66.7315
Chr1	408421	408619	AT1G02145_1	198,	0,	15.4914	8.92016
Chr1	410432	410532	AT1G02150_1	100,	0,	5.05118	49.2847
Chr1	411398	411585	AT1G02160_1	187,	0,	5.7144	17.1393
Chr1	413408	413506	AT1G02170_1	98,	0,	6.74623	11.7996
Chr1	413569	413716	AT1G02180_1	147,	0,	6.228	4.17797
Chr1	419798	419949	AT1G02205_1	151,	0,	1.73868	35.7879
Chr1	422229	422379	AT1G02205_2	150,	0,	1.79203	35.7879
Chr1	440546	440795	AT1G02260_1	249,	0,	3.92582	6.11309
Chr1	443216	443513	AT1G02270_1	297,	0,	9.28019	8.54267
Chr1	448519	448617	AT1G02280_1	98,	0,	10.9233	42.2069
Chr1	455323	455519	AT1G02300_1	196,	0,	5.98717	11.6765
Chr1	457921	458067	AT1G02305_1	146,	0,	8.89566	37.9312
Chr1	462094	462294	AT1G02330_1	200,	0,	6.0909	13.194
Chr1	462776	463124	AT1G02330_2	24,124,2,	0,99,346,	1.55892	13.194
Chr1	463272	463469	AT1G02330_3	51,49,	0,148,	1.7698	13.194
Chr1	476363	476513	AT1G02370_1	150,	0,	3.924	3.46635
Chr1	492635	492930	AT1G02410_1	295,	0,	12.9383	7.84841
Chr1	498299	498443	AT1G02450_1	144,	0,	3.05321	5.30131
Chr1	513896	514117	AT1G02475_1	138,12,	0,209,	6.36983	42.0878
Chr1	515173	515323	AT1G02475_2	150,	0,	2.89972	42.0878
Chr1	520202	520301	AT1G02500_1	99,	0,	2.83044	111.819
Chr1	539781	540028	AT1G02560_1	247,	0,	10.6038	181.982
Chr1	581928	582215	AT1G02680_1	287,	0,	9.15295	5.40604
Chr1	592178	592327	AT1G02720_1	149,	0,	1.77257	4.15215
Chr1	593965	594165	AT1G02720_2	200,	0,	6.27203	4.15215
Chr1	599622	599770	AT1G02740_1	148,	0,	2.39097	2.93149
Chr1	601240	601339	AT1G02740_2	99,	0,	1.60193	2.93149
Chr1	607943	608136	AT1G02780_1	193,	0,	6.04386	406.686
Chr1	629596	629795	AT1G02840_1	199,	0,	21.2726	26.4069
Chr1	636871	637212	AT1G02860_1	15,235,	0,106,	3.27813	2.15034
Chr1	637313	637513	AT1G02870_1	200,	0,	5.20628	15.6853
Chr1	642853	643103	AT1G02880_1	250,	0,	6.58259	7.1562
Chr1	655665	655764	AT1G02910_1	99,	0,	17.9733	34.5365
Chr1	666954	667283	AT1G02960_1	114,133,	0,196,	11.5591	4.37635
Chr1	684416	684567	AT1G02990_2	151,	0,	2.55198	3.98887
Chr1	687894	688144	AT1G03000_1	250,	0,	11.8378	5.5804
Chr1	703535	703782	AT1G03030_1	247,	0,	8.63894	6.94121
Chr1	703944	704288	AT1G03040_1	344,	0,	6.62805	17.0007
Chr1	706443	706542	AT1G03040_2	99,	0,	2.58133	17.0007
Chr1	710066	710269	AT1G03055_1	70,29,	0,174,	6.61976	4.62732
Chr1	712539	712840	AT1G03060_1	301,	0,	13.8395	6.65791
Chr1	713989	714090	AT1G03060_2	101,	0,	1.64152	6.65791
Chr1	731702	732250	AT1G03080_1	548,	0,	3.76018	11.4009
Chr1	733877	733978	AT1G03080_2	101,	0,	1.33048	11.4009
Chr1	743686	744035	AT1G03090_1	30,221,	0,128,	10.4763	3.75984
Chr1	751680	751877	AT1G03110_1	197,	0,	5.46342	5.5207
Chr1	753975	754119	AT1G03130_1	144,	0,	3.10291	189.561
Chr1	755526	755770	AT1G03140_1	244,	0,	5.19307	15.581
Chr1	758254	758583	AT1G03150_1	5,234,	0,95,	5.70006	9.60318
Chr1	784196	784296	AT1G03210_1	100,	0,	5.26735	11.217
Chr1	787080	787379	AT1G03220_1	299,	0,	2.99424	12.4535
Chr1	790065	790312	AT1G03230_1	247,	0,	4.5642	6.85371
Chr1	793411	793558	AT1G03250_1	147,	0,	13.736	11.6707
Chr1	795547	795797	AT1G03260_1	250,	0,	10.1303	4.63039
Chr1	806669	806967	AT1G03280_1	298,	0,	12.2274	10.7825
Chr1	809439	809678	AT1G03290_1	143,7,	0,232,	2.22133	6.26942
Chr1	810587	810836	AT1G03290_2	249,	0,	15.9507	6.26942
Chr1	811083	811282	AT1G03290_3	199,	0,	3.37662	6.26942
Chr1	816563	816663	AT1G03310_1	100,	0,	2.6845	29.2056
Chr1	818030	818224	AT1G03330_1	194,	0,	11.2399	19.7693
Chr1	823273	823521	AT1G03350_1	248,	0,	2.65261	22.3241
Chr1	828959	829995	AT1G03365_1	223,275,	0,761,	2.33594	4.9402
Chr1	834612	834712	AT1G03370_1	100,	0,	1.83377	8.98712
Chr1	834911	835012	AT1G03370_2	101,	0,	1.19673	8.98712
Chr1	835111	835311	AT1G03370_3	200,	0,	6.75914	8.98712
Chr1	840280	840925	AT1G03380_1	131,418,	0,227,	9.03387	6.23666
Chr1	842805	842953	AT1G03400_1	148,	0,	7.35736	18.0508
Chr1	846651	846848	AT1G03410_2	197,	0,	1.48649	10.1492
Chr1	849274	849424	AT1G03430_1	150,	0,	3.89739	11.2171
Chr1	866384	866629	AT1G03470_1	245,	0,	4.80414	2.63854
Chr1	869051	869301	AT1G03475_1	250,	0,	10.8166	192.552
Chr1	871058	871159	AT1G03475_2	101,	0,	2.55318	192.552
Chr1	877959	878060	AT1G03520_1	101,	0,	3.83532	3.53263
Chr1	880828	880978	AT1G03530_2	150,	0,	2.29803	4.90647
Chr1	881472	881572	AT1G03530_3	100,	0,	2.75191	4.90647
Chr1	882311	882708	AT1G03530_4	397,	0,	6.59305	4.90647
Chr1	894336	894632	AT1G03590_1	296,	0,	3.90185	6.07951
Chr1	898917	899064	AT1G03600_1	147,	0,	2.715	154.301
Chr1	901126	901275	AT1G03610_1	149,	0,	2.02146	4.44651
Chr1	909202	909303	AT1G03630_1	101,	0,	6.54116	153.524
Chr1	916867	917059	AT1G03680_1	192,	0,	5.74109	335.786
Chr1	920292	920542	AT1G03687_1	250,	0,	8.66725	6.30148
Chr1	930958	931252	AT1G03730_1	294,	0,	1.6202	3.27002
Chr1	936802	937002	AT1G03740_1	200,	0,	12.1736	5.98926
Chr1	941110	941407	AT1G03760_1	157,42,	0,255,	7.05109	4.04513
Chr1	942309	942409	AT1G03760_2	100,	0,	1.69749	4.04513
Chr1	948307	948938	AT1G03780_1	36,212,120,27,	0,121,389,604,	2.05735	4.03338
Chr1	960083	960329	AT1G03820_1	246,	0,	3.77463	7.0926
Chr1	979406	979607	AT1G03860_1	201,	0,	14.8115	32.8393
Chr1	997232	997776	AT1G03910_1	44,72,63,22,	0,185,371,522,	3.17492	14.8235
Chr1	1000179	1000429	AT1G03910_2	250,	0,	17.0171	14.8235
Chr1	1008024	1008271	AT1G03930_1	247,	0,	9.36336	15.4369
Chr1	1011199	1011511	AT1G03950_1	234,10,	0,302,	5.78841	9.61118
Chr1	1018751	1018950	AT1G03970_1	199,	0,	2.34893	11.7199
Chr1	1050652	1050751	AT1G04070_1	99,	0,	6.27284	5.31686
Chr1	1056476	1056777	AT1G04080_1	301,	0,	20.0819	20.4603
Chr1	1064611	1064910	AT1G04120_1	299,	0,	11.1321	10.7808
Chr1	1075174	1075568	AT1G04130_1	26,268,	0,126,	8.12208	5.64565
Chr1	1075642	1075991	AT1G04140_1	349,	0,	9.15851	20.4383
Chr1	1092952	1093223	AT1G04160_1	36,115,	0,156,	1.67092	2.66865
Chr1	1099653	1099852	AT1G04170_1	199,	0,	17.0976	42.549
Chr1	1106500	1106647	AT1G04190_1	147,	0,	11.8676	16.3582
Chr1	1113563	1114007	AT1G04200_1	444,	0,	7.27502	7.14013
Chr1	1119540	1119640	AT1G04210_1	100,	0,	7.27924	10.2214
Chr1	1122187	1122387	AT1G04220_1	200,	0,	4.39758	2.6965
Chr1	1141068	1141168	AT1G04260_1	100,	0,	1.15396	5.07654
Chr1	1141751	1141849	AT1G04270_1	98,	0,	11.0497	219.81
Chr1	1144116	1144423	AT1G04280_2	8,190,	0,117,	2.52142	2.17613
Chr1	1147641	1147740	AT1G04290_1	99,	0,	3.28931	10.1485
Chr1	1148286	1148385	AT1G04290_2	99,	0,	2.98032	10.1485
Chr1	1148713	1148864	AT1G04300_1	151,	0,	3.83394	9.51319
Chr1	1149463	1149663	AT1G04300_2	200,	0,	2.58151	9.51319
Chr1	1150755	1151041	AT1G04300_3	127,74,	0,212,	6.59664	9.51319
Chr1	1163103	1163302	AT1G04340_1	199,	0,	10.2363	12.2102
Chr1	1166544	1166742	AT1G04350_1	198,	0,	5.12505	19.109
Chr1	1189238	1189386	AT1G04410_1	148,	0,	9.63753	330.993
Chr1	1193685	1193884	AT1G04420_1	199,	0,	14.2428	95.4161
Chr1	1201278	1201379	AT1G04430_1	101,	0,	2.94174	42.4138
Chr1	1217229	1217326	AT1G04480_1	97,	0,	12.2981	98.1842
Chr1	1230546	1230797	AT1G04510_1	251,	0,	20.485	19.648
Chr1	1231647	1231844	AT1G04520_1	197,	0,	3.12368	10.9358
Chr1	1233786	1233983	AT1G04520_2	197,	0,	2.93108	10.9358
Chr1	1234224	1234422	AT1G04530_1	198,	0,	7.25585	27.5129
Chr1	1235665	1235764	AT1G04530_2	99,	0,	3.0875	27.5129
Chr1	1241149	1241247	AT1G04550_1	98,	0,	2.32364	14.8683
Chr1	1241815	1242060	AT1G04550_2	245,	0,	2.62855	14.8683
Chr1	1243896	1244095	AT1G04555_1	199,	0,	12.6467	3.41616
Chr1	1248433	1248532	AT1G04570_2	99,	0,	1.89362	1.60077
Chr1	1258653	1258898	AT1G04590_1	245,	0,	12.9327	11.448
Chr1	1282705	1282953	AT1G04620_1	248,	0,	7.18053	27.4221
Chr1	1289783	1289932	AT1G04630_1	149,	0,	10.9829	29.052
Chr1	1315432	1315726	AT1G04690_1	294,	0,	5.59609	37.4495
Chr1	1324495	1324742	AT1G04710_1	247,	0,	12.7736	16.4068
Chr1	1331613	1331862	AT1G04750_1	249,	0,	26.0352	33.4456
Chr1	1340651	1341047	AT1G04780_1	396,	0,	4.74006	8.40233
Chr1	1341521	1341719	AT1G04780_2	198,	0,	1.52343	8.40233
Chr1	1348229	1348377	AT1G04790_1	148,	0,	14.9978	5.98576
Chr1	1348621	1348868	AT1G04790_2	247,	0,	6.51133	5.98576
Chr1	1348646	1348989	AT1G04800_1	343,	0,	6.21429	59.6782
Chr1	1355166	1355416	AT1G04810_1	250,	0,	9.29854	12.4562
Chr1	1356280	1356478	AT1G04820_1	198,	0,	4.78397	188.682
Chr1	1359019	1359169	AT1G04830_1	150,	0,	6.87523	4.09171
Chr1	1365155	1365402	AT1G04850_1	247,	0,	26.948	31.1829
Chr1	1366237	1366862	AT1G04850_2	62,68,61,56,	0,153,363,569,	4.21208	31.1829
Chr1	1373381	1373529	AT1G04870_1	148,	0,	10.2351	15.387
Chr1	1387307	1387895	AT1G04900_1	27,469,	0,119,	9.65596	5.23674
Chr1	1387920	1388071	AT1G04910_1	151,	0,	5.38059	10.8578
Chr1	1400629	1400780	AT1G04940_1	151,	0,	11.3174	1.92478
Chr1	1407869	1408115	AT1G04960_1	246,	0,	11.9454	7.94451
Chr1	1413477	1413577	AT1G04970_1	100,	0,	22.6014	6.75894
Chr1	1413741	1413987	AT1G04980_1	246,	0,	5.32997	16.3851
Chr1	1416390	1416737	AT1G04985_1	347,	0,	3.65199	12.8987
Chr1	1438145	1438392	AT1G05030_1	247,	0,	18.1418	3.91918
Chr1	1451099	1451247	AT1G05060_1	148,	0,	11.9531	9.60796
Chr1	1457105	1457205	AT1G05070_1	100,	0,	6.57521	13.1074
Chr1	1471421	1471852	AT1G05120_1	275,73,	0,358,	11.0163	5.01199
Chr1	1474709	1474809	AT1G05120_2	100,	0,	1.69601	5.01199
Chr1	1482691	1482839	AT1G05140_1	148,	0,	2.66867	44.7503
Chr1	1483912	1484059	AT1G05140_2	147,	0,	5.4195	44.7503
Chr1	1491071	1491367	AT1G05170_1	296,	0,	6.08218	7.3258
Chr1	1498261	1498459	AT1G05180_1	198,	0,	20.8307	11.6651
Chr1	1502489	1502633	AT1G05190_1	144,	0,	1.76106	475.586
Chr1	1508852	1509102	AT1G05200_1	250,	0,	4.79846	7.08167
Chr1	1509244	1509387	AT1G05205_1	143,	0,	5.87532	16.1359
Chr1	1518650	1518751	AT1G05230_2	101,	0,	2.22742	8.36305
Chr1	1531740	1531840	AT1G05270_1	100,	0,	4.71126	13.64
Chr1	1560726	1560972	AT1G05350_1	246,	0,	14.408	13.1226
Chr1	1577514	1577812	AT1G05380_1	298,	0,	1.99191	7.74944
Chr1	1577960	1578208	AT1G05380_2	248,	0,	1.75646	7.74944
Chr1	1582374	1582672	AT1G05380_3	298,	0,	7.61551	7.74944
Chr1	1585468	1585664	AT1G05410_1	196,	0,	4.61751	5.11916
Chr1	1594150	1594298	AT1G05430_1	148,	0,	3.40275	14.8193
Chr1	1601246	1601844	AT1G05460_1	598,	0,	6.66225	4.07891
Chr1	1611145	1611345	AT1G05470_1	16,84,	0,116,	2.42081	2.68326
Chr1	1628989	1629189	AT1G05500_1	200,	0,	24.6839	14.3061
Chr1	1630898	1631098	AT1G05520_1	200,	0,	12.4742	13.0547
Chr1	1635369	1635569	AT1G05520_2	200,	0,	1.43192	13.0547
Chr1	1640682	1640781	AT1G05540_1	99,	0,	2.59341	5.64835
Chr1	1645705	1646203	AT1G05560_1	498,	0,	3.64665	22.7407
Chr1	1647673	1647973	AT1G05570_1	300,	0,	10.0818	9.53661
Chr1	1669944	1670094	AT1G05590_1	150,	0,	1.7799	6.92065
Chr1	1671554	1671852	AT1G05590_2	298,	0,	2.17051	6.92065
Chr1	1681514	1681661	AT1G05620_1	147,	0,	4.24973	6.01885
Chr1	1682372	1682473	AT1G05630_1	101,	0,	1.99006	7.70631
Chr1	1687163	1687363	AT1G05630_2	200,	0,	9.90295	7.70631
Chr1	1689158	1689408	AT1G05640_1	250,	0,	2.84014	2.38712
Chr1	1717043	1717241	AT1G05710_1	198,	0,	9.01292	2.64607
Chr1	1717487	1717734	AT1G05720_1	247,	0,	6.73145	8.95699
Chr1	1732410	1732559	AT1G05785_1	149,	0,	9.71755	1.74966
Chr1	1737198	1737434	AT1G05790_1	3,148,	0,88,	6.5101	5.74761
Chr1	1749331	1749429	AT1G05810_1	98,	0,	5.30484	6.36644
Chr1	1754772	1754971	AT1G05830_1	199,	0,	3.61993	5.02341
Chr1	1761611	1761810	AT1G05830_2	199,	0,	9.37669	5.02341
Chr1	1762783	1762984	AT1G05840_1	201,	0,	12.8594	6.26612
Chr1	1766648	1766845	AT1G05850_1	197,	0,	8.78774	258.197
Chr1	1773185	1773285	AT1G05870_3	100,	0,	3.01822	10.9088
Chr1	1784229	1784477	AT1G05890_1	248,	0,	12.698	11.6386
Chr1	1789489	1789688	AT1G05900_1	199,	0,	12.0991	6.71576
Chr1	1791708	1791957	AT1G05910_1	249,	0,	7.56541	7.91775
Chr1	1801208	1801358	AT1G05940_1	150,	0,	14.5209	12.2761
Chr1	1808008	1808554	AT1G05960_1	546,	0,	14.369	11.281
Chr1	1821546	1821795	AT1G06000_1	249,	0,	2.85304	60.0725
Chr1	1823710	1823902	AT1G06010_1	192,	0,	11.301	5.35049
Chr1	1828585	1828684	AT1G06040_1	99,	0,	7.15187	13.8583
Chr1	1834926	1835464	AT1G06070_1	538,	0,	5.68483	5.21166
Chr1	1846110	1846211	AT1G06080_1	101,	0,	3.54131	3.2605
Chr1	1853108	1853257	AT1G06110_1	149,	0,	5.88354	6.88839
Chr1	1857854	1858100	AT1G06130_1	246,	0,	14.3839	13.3492
Chr1	1869038	1869188	AT1G06150_1	150,	0,	16.5574	10.6769
Chr1	1890884	1891032	AT1G06180_1	148,	0,	2.39062	2.27716
Chr1	1894385	1894627	AT1G06200_1	242,	0,	20.2069	22.1878
Chr1	1897275	1897680	AT1G06210_1	29,119,	0,286,	2.04175	10.2496
Chr1	1898795	1899139	AT1G06210_2	344,	0,	3.96256	10.2496
Chr1	1904597	1904847	AT1G06220_1	250,	0,	18.1204	15.5809
Chr1	1909351	1909601	AT1G06230_1	250,	0,	2.56995	11.1313
Chr1	1910205	1910807	AT1G06230_2	22,377,	0,225,	9.57362	11.1313
Chr1	1911343	1911667	AT1G06240_1	224,26,	0,298,	2.45238	11.3794
Chr1	1912896	1913195	AT1G06240_2	299,	0,	7.16019	11.3794
Chr1	1925981	1926130	AT1G06290_1	149,	0,	6.95026	18.7967
Chr1	1950414	1950712	AT1G06390_1	298,	0,	11.4989	20.7535
Chr1	1950645	1950745	AT1G06400_1	100,	0,	47.5213	16.3927
Chr1	1950892	1951190	AT1G06400_2	298,	0,	7.26017	16.3927
Chr1	1958367	1958717	AT1G06410_1	350,	0,	6.67821	26.1724
Chr1	1959017	1959565	AT1G06420_1	15,464,	0,84,	4.42503	2.55878
Chr1	1960080	1960281	AT1G06430_1	201,	0,	11.5804	24.4383
Chr1	1967184	1967283	AT1G06460_1	99,	0,	3.74152	83.0522
Chr1	1973442	1973738	AT1G06470_1	296,	0,	18.1731	8.07236
Chr1	1990285	1990434	AT1G06500_1	149,	0,	2.06972	7.26781
Chr1	1990532	1990730	AT1G06500_2	198,	0,	13.9075	7.26781
Chr1	1993648	1993793	AT1G06510_1	145,	0,	10.85	16.6648
Chr1	1990682	1990877	AT1G06515_1	195,	0,	8.32824	10.0412
Chr1	2003675	2004029	AT1G06550_1	207,42,	0,312,	5.41854	21.3166
Chr1	2011807	2011907	AT1G06560_1	100,	0,	2.39202	5.30513
Chr1	2011981	2012128	AT1G06570_1	147,	0,	2.34353	5.88789
Chr1	2029404	2029505	AT1G06630_1	101,	0,	2.67894	2.94786
Chr1	2033815	2033915	AT1G06640_1	100,	0,	4.37096	13.8768
Chr1	2035473	2035724	AT1G06645_1	251,	0,	4.1451	10.722
Chr1	2037168	2037366	AT1G06650_1	198,	0,	14.4356	30.16
Chr1	2037359	2037458	AT1G06660_1	99,	0,	21.417	1.16122
Chr1	2049642	2049838	AT1G06690_1	196,	0,	4.93816	22.9421
Chr1	2052568	2052817	AT1G06700_1	249,	0,	12.1407	20.5124
Chr1	2060542	2060985	AT1G06720_1	234,114,	0,329,	6.41699	7.22875
Chr1	2062737	2063590	AT1G06720_2	84,94,269,	0,154,584,	2.1058	7.22875
Chr1	2067608	2067758	AT1G06730_1	150,	0,	2.15909	6.21851
Chr1	2070005	2070405	AT1G06730_2	400,	0,	8.89575	6.21851
Chr1	2077428	2077526	AT1G06760_1	98,	0,	1.69803	126.965
Chr1	2089301	2089544	AT1G06790_1	243,	0,	19.4435	4.17697
Chr1	2089465	2089564	AT1G06800_1	99,	0,	20.095	3.869
Chr1	2093044	2093193	AT1G06820_1	149,	0,	4.58091	16.6479
Chr1	2105245	2105591	AT1G06850_1	346,	0,	3.14556	3.72717
Chr1	2106600	2106700	AT1G06850_2	100,	0,	3.50947	3.72717
Chr1	2110789	2110937	AT1G06870_1	148,	0,	11.6039	8.60668
Chr1	2111471	2111821	AT1G06890_1	350,	0,	4.84916	28.4779
Chr1	2115012	2115212	AT1G06900_1	200,	0,	9.81886	10.8308
Chr1	2120211	2120497	AT1G06900_2	20,180,	0,106,	4.77739	10.8308
Chr1	2122917	2123702	AT1G06910_1	1,197,	0,588,	9.32093	3.73869
Chr1	2130202	2130352	AT1G06950_1	150,	0,	18.0597	70.1982
Chr1	2135453	2135603	AT1G06950_2	150,	0,	2.05227	70.1982
Chr1	2137543	2137740	AT1G06960_1	197,	0,	23.2828	8.05059
Chr1	2154971	2155220	AT1G07010_1	249,	0,	7.08457	26.7775
Chr1	2158462	2158612	AT1G07030_1	150,	0,	5.52398	8.87417
Chr1	2161017	2161214	AT1G07040_1	197,	0,	8.40172	7.38443
Chr1	2162943	2163091	AT1G07040_2	148,	0,	2.38958	7.38443
Chr1	2169663	2169811	AT1G07070_1	148,	0,	7.03301	25.1743
Chr1	2171802	2171998	AT1G07080_1	196,	0,	9.53313	36.2366
Chr1	2174790	2174939	AT1G07090_1	149,	0,	2.17794	9.59899
Chr1	2178170	2178420	AT1G07110_1	250,	0,	7.7717	58.2963
Chr1	2192069	2192217	AT1G07140_1	148,	0,	4.56373	131.258
Chr1	2192411	2192510	AT1G07140_2	99,	0,	3.59207	131.258
Chr1	2200928	2201174	AT1G07170_1	246,	0,	9.10945	4.38792
Chr1	2216692	2216934	AT1G07210_1	242,	0,	12.2216	18.9987
Chr1	2216974	2217224	AT1G07220_1	250,	0,	9.45976	7.4982
Chr1	2220328	2220575	AT1G07230_1	247,	0,	5.90952	10.5294
Chr1	2222721	2222919	AT1G07230_2	198,	0,	2.00119	10.5294
Chr1	2245792	2245943	AT1G07300_1	151,	0,	3.06695	2.01813
Chr1	2247561	2247662	AT1G07310_1	101,	0,	3.46074	9.42898
Chr1	2248260	2248411	AT1G07310_2	151,	0,	1.95604	9.42898
Chr1	2250235	2250431	AT1G07320_1	196,	0,	5.93755	265.784
Chr1	2257532	2257731	AT1G07350_1	199,	0,	7.17297	17.3149
Chr1	2260414	2260563	AT1G07360_1	149,	0,	6.17624	13.8555
Chr1	2260709	2260808	AT1G07360_2	99,	0,	1.5174	13.8555
Chr1	2280058	2280256	AT1G07420_1	198,	0,	19.0169	11.4153
Chr1	2294237	2294558	AT1G07470_1	17,232,	0,89,	17.5349	5.92027
Chr1	2296468	2296805	AT1G07480_1	261,38,	0,299,	17.2377	4.25034
Chr1	2313630	2313730	AT1G07530_1	100,	0,	2.34982	7.89881
Chr1	2313976	2314126	AT1G07530_2	150,	0,	2.5114	7.89881
Chr1	2342246	2342493	AT1G07615_1	247,	0,	6.01264	3.78187
Chr1	2359606	2359905	AT1G07650_1	299,	0,	8.31438	14.6716
Chr1	2370168	2370367	AT1G07670_1	199,	0,	7.53176	9.92158
Chr1	2381144	2381292	AT1G07700_1	148,	0,	10.0046	21.5307
Chr1	2385808	2386058	AT1G07705_1	250,	0,	14.7452	8.54971
Chr1	2404138	2404236	AT1G07750_1	98,	0,	9.0214	7.17167
Chr1	2408236	2408480	AT1G07770_1	244,	0,	6.73511	80.1546
Chr1	2410012	2410456	AT1G07780_1	444,	0,	5.40132	3.85483
Chr1	2413032	2413175	AT1G07790_1	143,	0,	1.71136	43.1549
Chr1	2420581	2420730	AT1G07810_1	149,	0,	15.6109	7.83121
Chr1	2423415	2423706	AT1G07830_1	291,	0,	5.51357	8.87911
Chr1	2425785	2426124	AT1G07840_1	77,173,	0,166,	2.29806	11.1316
Chr1	2426272	2426629	AT1G07840_2	34,216,	0,141,	7.90292	11.1316
Chr1	2439515	2439615	AT1G07890_1	100,	0,	6.14578	250.038
Chr1	2457076	2457272	AT1G07920_1	196,	0,	3.39129	81.8296
Chr1	2460517	2460668	AT1G07930_1	151,	0,	3.53466	126.002
Chr1	2463095	2463243	AT1G07940_1	148,	0,	10.8635	49.037
Chr1	2465826	2465974	AT1G07950_1	148,	0,	2.96546	7.92262
Chr1	2468828	2469170	AT1G07960_1	342,	0,	12.1375	10.8532
Chr1	2473312	2473511	AT1G07980_1	199,	0,	3.42382	7.54264
Chr1	2474583	2474782	AT1G07980_2	199,	0,	1.83079	7.54264
Chr1	2481278	2481842	AT1G07990_1	19,133,47,	0,301,517,	1.76793	9.35678
Chr1	2482651	2483147	AT1G07990_2	496,	0,	10.081	9.35678
Chr1	2483288	2483486	AT1G08000_1	198,	0,	3.521	3.55198
Chr1	2485995	2486194	AT1G08010_1	199,	0,	2.55993	7.67299
Chr1	2489507	2489705	AT1G08030_1	198,	0,	11.1765	4.29963
Chr1	2495407	2495555	AT1G08040_1	148,	0,	9.26383	16.7659
Chr1	2502152	2502352	AT1G08060_2	200,	0,	2.13364	2.99333
Chr1	2505233	2505383	AT1G08060_3	150,	0,	2.02677	2.99333
Chr1	2537688	2537883	AT1G08110_1	195,	0,	13.3185	46.2228
Chr1	2539662	2539999	AT1G08125_1	97,148,	0,189,	6.31745	7.81684
Chr1	2542760	2542958	AT1G08130_1	198,	0,	12.6664	10.4325
Chr1	2567618	2567768	AT1G08190_1	150,	0,	3.57304	32.6069
Chr1	2573049	2573349	AT1G08190_2	300,	0,	11.9782	32.6069
Chr1	2573967	2574217	AT1G08200_1	250,	0,	11.8505	119.271
Chr1	2577081	2577230	AT1G08210_1	149,	0,	3.15283	4.73839
Chr1	2586170	2586371	AT1G08230_2	201,	0,	1.67145	2.09864
Chr1	2606593	2606892	AT1G08260_1	299,	0,	11.4113	2.0479
Chr1	2637665	2637859	AT1G08360_1	194,	0,	13.5468	159.824
Chr1	2639861	2639960	AT1G08370_1	99,	0,	1.87622	9.27707
Chr1	2640205	2640516	AT1G08370_2	40,206,	0,105,	6.39164	9.27707
Chr1	2656524	2657070	AT1G08420_1	546,	0,	3.56996	16.1424
Chr1	2667946	2668524	AT1G08450_1	73,33,87,57,	0,188,341,521,	3.64789	56.6892
Chr1	2674423	2674622	AT1G08460_1	199,	0,	5.69916	5.73584
Chr1	2682155	2682401	AT1G08470_1	246,	0,	3.1067	14.2682
Chr1	2683925	2684024	AT1G08470_2	99,	0,	1.78283	14.2682
Chr1	2685401	2685602	AT1G08480_1	201,	0,	10.5792	31.264
Chr1	2685707	2685955	AT1G08490_1	248,	0,	11.0518	21.3708
Chr1	2691161	2691659	AT1G08510_1	498,	0,	5.07896	40.2111
Chr1	2702868	2703113	AT1G08530_1	245,	0,	6.17997	9.00278
Chr1	2706509	2706760	AT1G08540_1	251,	0,	9.09299	62.7099
Chr1	2709043	2709491	AT1G08550_1	448,	0,	6.12957	43.2579
Chr1	2710217	2710316	AT1G08560_1	99,	0,	1.66139	12.4462
Chr1	2715183	2715490	AT1G08580_1	174,17,	0,290,	3.87332	25.13
Chr1	2724564	2724815	AT1G08600_1	251,	0,	5.19192	4.40401
Chr1	2732915	2733263	AT1G08600_2	37,214,	0,134,	2.02435	4.40401
Chr1	2743331	2743681	AT1G08620_1	350,	0,	7.6311	4.72792
Chr1	2748460	2748661	AT1G08640_1	201,	0,	15.3524	39.9866
Chr1	2752221	2752319	AT1G08650_1	98,	0,	2.19901	11.2354
Chr1	2756952	2757199	AT1G08660_1	247,	0,	7.76632	12.293
Chr1	2759593	2759692	AT1G08660_2	99,	0,	1.95506	12.293
Chr1	2768420	2768619	AT1G08680_1	199,	0,	17.3291	7.00912
Chr1	2809825	2810115	AT1G08780_1	290,	0,	2.42365	15.6678
Chr1	2814054	2814253	AT1G08800_2	199,	0,	1.9725	2.57897
Chr1	2821552	2821851	AT1G08820_1	299,	0,	18.4698	8.94286
Chr1	2829120	2829218	AT1G08830_1	98,	0,	10.4639	129.424
Chr1	2855592	2855692	AT1G08900_1	100,	0,	11.2462	5.7096
Chr1	2859535	2859635	AT1G08910_1	100,	0,	1.72867	4.3119
Chr1	2860282	2860431	AT1G08910_2	149,	0,	2.44138	4.3119
Chr1	2860824	2861071	AT1G08910_3	247,	0,	4.45425	4.3119
Chr1	2877019	2877119	AT1G08930_1	100,	0,	9.43384	25.4348
Chr1	2877967	2878115	AT1G08940_1	148,	0,	2.40273	2.0853
Chr1	2879804	2880053	AT1G08960_1	249,	0,	2.41595	4.2644
Chr1	2881238	2881338	AT1G08960_2	100,	0,	1.59311	4.2644
Chr1	2882587	2882735	AT1G08970_1	148,	0,	2.58948	11.78
Chr1	2883854	2883952	AT1G08970_2	98,	0,	8.26557	11.78
Chr1	2884097	2884245	AT1G08970_3	148,	0,	13.1319	11.78
Chr1	2921162	2921262	AT1G09060_1	100,	0,	8.96619	8.96213
Chr1	2936625	2936725	AT1G09100_1	100,	0,	14.7429	11.2853
Chr1	2939714	2939813	AT1G09130_1	99,	0,	15.3927	84.267
Chr1	2942635	2942832	AT1G09140_1	197,	0,	19.564	17.23
Chr1	2948750	2949111	AT1G09150_1	23,221,	0,140,	11.6928	14.8292
Chr1	2952894	2953094	AT1G09160_1	200,	0,	8.05192	11.3757
Chr1	2966608	2966804	AT1G09190_2	196,	0,	1.94134	2.21592
Chr1	2973077	2973225	AT1G09210_1	148,	0,	7.64651	57.2884
Chr1	2979560	2979660	AT1G09230_1	100,	0,	2.24605	3.41045
Chr1	2981362	2981809	AT1G09230_2	36,82,32,	0,178,415,	1.56738	3.41045
Chr1	2994479	2994628	AT1G09270_1	149,	0,	3.33219	19.1669
Chr1	2997775	2998222	AT1G09270_2	447,	0,	11.0466	19.1669
Chr1	2998148	2998345	AT1G09280_1	197,	0,	9.12403	4.31279
Chr1	3001537	3001637	AT1G09290_1	100,	0,	18.4744	5.1155
Chr1	3009107	3009256	AT1G09310_1	149,	0,	2.86903	865.545
Chr1	3010869	3011100	AT1G09320_2	16,83,	0,148,	1.8376	2.7686
Chr1	3011492	3011768	AT1G09320_3	2,146,	0,130,	1.63218	2.7686
Chr1	3012835	3012982	AT1G09330_1	147,	0,	7.56175	14.2208
Chr1	3018000	3018197	AT1G09340_1	197,	0,	4.27156	469.908
Chr1	3038080	3038268	AT1G09415_1	188,	0,	3.7978	17.0081
Chr1	3038511	3038662	AT1G09420_1	151,	0,	6.4399	9.06348
Chr1	3044997	3045343	AT1G09430_1	346,	0,	15.0882	22.5381
Chr1	3056604	3056803	AT1G09470_2	55,43,	0,156,	1.72445	2.97802
Chr1	3065705	3065852	AT1G09490_1	147,	0,	5.31721	15.6589
Chr1	3071687	3071833	AT1G09520_1	146,	0,	1.40649	5.70833
Chr1	3079259	3079457	AT1G09530_1	198,	0,	5.30173	2.43774
Chr1	3095308	3095507	AT1G09570_1	199,	0,	6.44996	6.46343
Chr1	3106067	3106167	AT1G09580_1	100,	0,	5.94627	7.26077
Chr1	3107461	3107704	AT1G09590_1	243,	0,	5.2372	128.011
Chr1	3112876	3113076	AT1G09620_1	200,	0,	3.35561	27.4076
Chr1	3118253	3118403	AT1G09630_1	150,	0,	5.76504	13.6828
Chr1	3122241	3122442	AT1G09640_1	201,	0,	6.06498	85.4656
Chr1	3124328	3124522	AT1G09645_1	194,	0,	6.88288	9.12701
Chr1	3127860	3128060	AT1G09660_1	200,	0,	11.3579	18.715
Chr1	3136332	3136430	AT1G09690_1	98,	0,	5.74741	194.576
Chr1	3137794	3138381	AT1G09700_1	587,	0,	5.60567	5.14653
Chr1	3147736	3148185	AT1G09730_1	449,	0,	4.20976	7.47458
Chr1	3156083	3156230	AT1G09740_1	147,	0,	16.0204	5.49716
Chr1	3157599	3157846	AT1G09750_1	247,	0,	2.41641	98.025
Chr1	3157944	3158142	AT1G09750_2	198,	0,	1.4331	98.025
Chr1	3159174	3159422	AT1G09760_1	248,	0,	18.8365	23.0237
Chr1	3162696	3162896	AT1G09770_1	200,	0,	2.20874	24.5066
Chr1	3163745	3163846	AT1G09770_2	101,	0,	1.4044	24.5066
Chr1	3164577	3165316	AT1G09770_3	99,551,	0,188,	4.9018	24.5066
Chr1	3165415	3165566	AT1G09770_4	151,	0,	3.40313	24.5066
Chr1	3165418	3165567	AT1G09780_1	149,	0,	3.32993	52.6922
Chr1	3172144	3172240	AT1G09794_1	96,	0,	2.97229	2.37192
Chr1	3173269	3173462	AT1G09794_2	193,	0,	10.0026	2.37192
Chr1	3176665	3176861	AT1G09795_1	196,	0,	11.4511	76.0087
Chr1	3181025	3181427	AT1G09810_1	274,26,	0,376,	4.39805	3.80129
Chr1	3192715	3192864	AT1G09830_1	149,	0,	6.47728	19.8167
Chr1	3194747	3194945	AT1G09830_2	198,	0,	2.36311	19.8167
Chr1	3195867	3196528	AT1G09840_1	335,14,	0,647,	7.41281	12.4449
Chr1	3203857	3204101	AT1G09850_1	244,	0,	11.0138	17.1232
Chr1	3208417	3208615	AT1G09870_1	198,	0,	9.04344	8.4278
Chr1	3224732	3225129	AT1G09920_1	281,14,	0,383,	7.00061	17.2448
Chr1	3237054	3237299	AT1G09940_1	245,	0,	4.55085	8.03938
Chr1	3237445	3237544	AT1G09940_2	99,	0,	1.43904	8.03938
Chr1	3252297	3252498	AT1G09970_1	201,	0,	2.41633	14.7142
Chr1	3255132	3255432	AT1G09970_2	300,	0,	3.39834	14.7142
Chr1	3255531	3255632	AT1G09970_3	101,	0,	1.6403	14.7142
Chr1	3256336	3256633	AT1G09980_1	297,	0,	13.273	6.54808
Chr1	3275658	3275855	AT1G10030_1	197,	0,	15.4278	6.55811
Chr1	3283185	3283433	AT1G10050_1	248,	0,	3.87946	3.13892
Chr1	3286798	3286996	AT1G10060_1	198,	0,	2.49053	4.52934
Chr1	3290359	3290656	AT1G10090_1	297,	0,	11.086	9.07649
Chr1	3304087	3304186	AT1G10120_1	99,	0,	4.25849	6.8245
Chr1	3305233	3305381	AT1G10120_2	148,	0,	1.91063	6.8245
Chr1	3321920	3322219	AT1G10130_1	299,	0,	19.2122	8.715
Chr1	3337051	3337252	AT1G10170_2	201,	0,	1.9432	7.05925
Chr1	3346481	3346581	AT1G10200_1	100,	0,	2.31878	51.3532
Chr1	3363530	3363926	AT1G10270_1	396,	0,	2.2114	4.01753
Chr1	3377067	3377414	AT1G10290_1	347,	0,	18.4368	25.1991
Chr1	3381595	3381795	AT1G10310_1	200,	0,	15.1677	15.998
Chr1	3384166	3384810	AT1G10320_1	644,	0,	3.56	5.46946
Chr1	3387795	3388376	AT1G10320_2	87,408,	0,173,	14.0358	5.46946
Chr1	3393386	3393584	AT1G10350_1	198,	0,	2.62243	6.98433
Chr1	3395598	3395745	AT1G10360_1	147,	0,	3.63699	40.9203
Chr1	3407104	3407602	AT1G10390_1	498,	0,	4.39291	14.3428
Chr1	3416728	3416929	AT1G10410_1	201,	0,	12.2316	7.09136
Chr1	3428526	3428723	AT1G10430_1	197,	0,	10.4797	15.6862
Chr1	3436295	3436446	AT1G10450_1	151,	0,	1.83959	4.44435
Chr1	3442487	3442587	AT1G10470_1	100,	0,	4.73954	49.5296
Chr1	3459772	3460172	AT1G10490_1	400,	0,	9.75257	8.72152
Chr1	3460049	3460199	AT1G10500_1	150,	0,	5.68594	37.5793
Chr1	3471290	3471439	AT1G10522_1	149,	0,	14.0883	21.2817
Chr1	3491307	3491507	AT1G10580_1	200,	0,	14.6874	17.118
Chr1	3492936	3493236	AT1G10580_2	300,	0,	5.33396	17.118
Chr1	3502135	3502235	AT1G10590_1	100,	0,	8.64408	63.6836
Chr1	3505185	3505526	AT1G10600_1	341,	0,	9.3367	6.51535
Chr1	3512983	3513180	AT1G10630_1	197,	0,	10.2312	28.5077
Chr1	3534889	3535088	AT1G10660_1	199,	0,	4.89535	10.2003
Chr1	3538027	3538223	AT1G10670_1	196,	0,	9.27059	79.3022
Chr1	3563380	3563479	AT1G10720_1	99,	0,	3.54303	8.6451
Chr1	3564555	3564703	AT1G10720_2	148,	0,	3.5436	8.6451
Chr1	3568247	3568495	AT1G10740_1	248,	0,	9.66542	8.70495
Chr1	3581078	3581229	AT1G10760_1	151,	0,	17.4126	78.8844
Chr1	3600958	3601304	AT1G10820_1	346,	0,	4.6051	8.4405
Chr1	3604829	3605027	AT1G10820_2	198,	0,	2.28123	8.4405
Chr1	3605611	3605711	AT1G10830_1	100,	0,	7.64923	15.8436
Chr1	3607280	3607431	AT1G10830_2	151,	0,	2.07202	15.8436
Chr1	3607776	3607922	AT1G10840_1	146,	0,	9.93969	41.3723
Chr1	3613088	3613289	AT1G10850_1	201,	0,	2.52151	7.23164
Chr1	3614362	3614613	AT1G10850_2	251,	0,	9.78219	7.23164
Chr1	3614607	3614752	AT1G10865_1	145,	0,	9.07668	6.88367
Chr1	3616708	3616908	AT1G10870_1	200,	0,	13.9916	7.43201
Chr1	3629229	3630658	AT1G10890_1	75,220,404,	0,615,1025,	5.93409	17.0499
Chr1	3635929	3636078	AT1G10900_2	149,	0,	1.55568	3.94313
Chr1	3643988	3644137	AT1G10910_1	149,	0,	18.559	13.8107
Chr1	3645716	3646064	AT1G10920_2	348,	0,	3.37089	3.55876
Chr1	3647974	3648224	AT1G10930_1	250,	0,	5.56126	6.27398
Chr1	3655870	3656169	AT1G10940_1	299,	0,	9.63908	24.8966
Chr1	3659302	3659402	AT1G10950_1	100,	0,	1.69693	41.6157
Chr1	3663618	3663917	AT1G10950_2	299,	0,	6.14094	41.6157
Chr1	3664470	3664566	AT1G10960_1	96,	0,	2.26459	340.297
Chr1	3678323	3678518	AT1G11020_1	195,	0,	4.90006	5.28864
Chr1	3683770	3683920	AT1G11050_2	150,	0,	3.91084	3.35319
Chr1	3727200	3727400	AT1G11130_1	200,	0,	15.757	6.53307
Chr1	3748263	3748411	AT1G11180_1	148,	0,	5.01628	6.40455
Chr1	3755461	3755609	AT1G11200_1	148,	0,	8.41925	7.32307
Chr1	3766802	3767050	AT1G11240_1	248,	0,	6.59057	9.12544
Chr1	3767411	3768120	AT1G11240_2	109,106,33,	0,473,676,	2.48223	9.12544
Chr1	3787416	3787516	AT1G11280_1	100,	0,	6.93218	6.20678
Chr1	3800700	3800851	AT1G11303_1	151,	0,	8.39888	3.63763
Chr1	3800844	3800943	AT1G11310_1	99,	0,	6.6806	46.1556
Chr1	3813361	3813560	AT1G11330_1	199,	0,	6.39633	13.7877
Chr1	3817572	3817771	AT1G11350_1	199,	0,	5.78206	11.6748
Chr1	3821545	3821644	AT1G11360_1	99,	0,	11.4406	11.1709
Chr1	3832661	3832761	AT1G11380_1	100,	0,	1.86604	5.52548
Chr1	3833916	3834264	AT1G11380_2	348,	0,	5.93422	5.52548
Chr1	3838776	3838875	AT1G11400_1	99,	0,	1.80833	4.35441
Chr1	3839853	3840196	AT1G11400_2	343,	0,	7.05193	4.35441
Chr1	3848877	3849076	AT1G11430_1	199,	0,	9.28705	96.9744
Chr1	3850041	3850240	AT1G11440_1	199,	0,	6.83749	7.56824
Chr1	3863794	3863981	AT1G11475_1	187,	0,	16.4911	24.8728
Chr1	3864141	3864388	AT1G11480_1	247,	0,	16.2079	12.9065
Chr1	3866802	3866901	AT1G11480_2	99,	0,	1.97349	12.9065
Chr1	3875251	3875391	AT1G11530_1	140,	0,	6.56723	16.302
Chr1	3895319	3895466	AT1G11591_1	147,	0,	7.57395	3.18602
Chr1	3917943	3918094	AT1G11650_1	151,	0,	28.1402	108.734
Chr1	3924316	3924466	AT1G11660_1	150,	0,	12.5716	10.2824
Chr1	3952695	3952846	AT1G11720_1	151,	0,	1.53532	17.9975
Chr1	3953194	3953345	AT1G11720_2	151,	0,	2.96924	17.9975
Chr1	3956793	3956994	AT1G11720_3	201,	0,	12.5703	17.9975
Chr1	3969528	3969877	AT1G11750_1	349,	0,	5.10813	68.2156
Chr1	3969728	3969923	AT1G11755_1	195,	0,	7.90864	4.9365
Chr1	3977429	3977578	AT1G11780_1	149,	0,	9.85596	5.34334
Chr1	3985019	3985119	AT1G11790_1	100,	0,	8.78781	17.6499
Chr1	3997526	3997770	AT1G11840_1	244,	0,	7.04007	127.325
Chr1	4003248	4003349	AT1G11860_1	101,	0,	3.93672	836.203
Chr1	4006565	4006716	AT1G11870_1	151,	0,	12.4817	12.4068
Chr1	4012904	4013054	AT1G11890_1	150,	0,	17.0501	26.345
Chr1	4015946	4016047	AT1G11905_1	101,	0,	1.5073	6.4821
Chr1	4016861	4017112	AT1G11910_1	251,	0,	5.06934	94.7786
Chr1	4030264	4030509	AT1G11930_1	245,	0,	6.48527	35.1315
Chr1	4041740	4042002	AT1G11960_2	7,81,12,	0,86,250,	2.14994	4.04327
Chr1	4050042	4050190	AT1G12000_1	148,	0,	11.1221	31.1397
Chr1	4075864	4076108	AT1G12050_1	5,145,	0,99,	10.9718	15.6282
Chr1	4076321	4076465	AT1G12060_1	144,	0,	2.81543	5.7756
Chr1	4076847	4076943	AT1G12060_2	96,	0,	1.98949	5.7756
Chr1	4084591	4084889	AT1G12080_1	298,	0,	5.1664	55.2428
Chr1	4109307	4109454	AT1G12110_1	147,	0,	5.90084	47.4083
Chr1	4114870	4115266	AT1G12120_1	396,	0,	2.48104	17.8637
Chr1	4123321	4123471	AT1G12140_1	150,	0,	3.33587	16.9663
Chr1	4150662	4150958	AT1G12230_1	296,	0,	10.097	35.2841
Chr1	4158898	4158997	AT1G12244_1	99,	0,	7.08787	8.78506
Chr1	4161207	4161407	AT1G12250_1	200,	0,	13.9843	40.7601
Chr1	4174580	4174730	AT1G12270_1	150,	0,	18.0525	19.0636
Chr1	4194718	4195524	AT1G12330_1	29,420,	0,386,	2.59884	20.5039
Chr1	4196549	4196649	AT1G12330_2	100,	0,	1.8082	20.5039
Chr1	4200556	4200800	AT1G12350_1	244,	0,	11.0839	14.0847
Chr1	4206092	4206339	AT1G12360_1	247,	0,	18.7107	13.1414
Chr1	4215193	4215293	AT1G12380_1	100,	0,	1.38525	4.33325
Chr1	4216425	4216623	AT1G12380_2	198,	0,	1.51584	4.33325
Chr1	4224915	4225061	AT1G12410_1	146,	0,	7.89541	101.642
Chr1	4233864	4234261	AT1G12430_1	397,	0,	7.85347	10.1898
Chr1	4236383	4236532	AT1G12430_2	149,	0,	2.00642	10.1898
Chr1	4241664	4241763	AT1G12440_1	99,	0,	2.49529	23.7999
Chr1	4245744	4245844	AT1G12450_1	100,	0,	2.15351	3.29142
Chr1	4257094	4257392	AT1G12470_1	298,	0,	12.1022	9.93516
Chr1	4257316	4257416	AT1G12480_1	100,	0,	17.4723	2.75484
Chr1	4263346	4263594	AT1G12500_1	248,	0,	3.66368	20.9911
Chr1	4264761	4264860	AT1G12500_2	99,	0,	1.96007	20.9911
Chr1	4267171	4267516	AT1G12520_1	345,	0,	3.56021	33.1876
Chr1	4268735	4268835	AT1G12520_2	100,	0,	1.21234	33.1876
Chr1	4269032	4269365	AT1G12530_1	333,	0,	8.70163	7.21947
Chr1	4285480	4285827	AT1G12580_1	347,	0,	6.46757	9.01807
Chr1	4303477	4303578	AT1G12640_1	101,	0,	3.98761	12.2562
Chr1	4307072	4307908	AT1G12650_1	49,121,47,331,	0,141,373,505,	4.39943	11.1226
Chr1	4319925	4320270	AT1G12680_1	345,	0,	6.15662	6.50558
Chr1	4326787	4326887	AT1G12710_1	100,	0,	2.81483	5.12427
Chr1	4337357	4337857	AT1G12730_1	16,335,	0,165,	13.8167	2.54504
Chr1	4345042	4345192	AT1G12750_1	150,	0,	8.29934	4.5189
Chr1	4350545	4350745	AT1G12760_1	200,	0,	4.23955	18.1805
Chr1	4353448	4353598	AT1G12770_1	150,	0,	5.59097	22.5795
Chr1	4356024	4356173	AT1G12780_1	149,	0,	3.86766	10.3001
Chr1	4368532	4368774	AT1G12810_1	242,	0,	8.35296	13.7457
Chr1	4368858	4369058	AT1G12820_1	200,	0,	1.9457	15.9356
Chr1	4374548	4374844	AT1G12840_1	296,	0,	6.98876	54.2459
Chr1	4378218	4378465	AT1G12840_2	247,	0,	15.7784	54.2459
Chr1	4379792	4379892	AT1G12850_1	100,	0,	5.18499	14.0403
Chr1	4384598	4384747	AT1G12860_1	149,	0,	1.95412	13.4094
Chr1	4384943	4385092	AT1G12860_2	149,	0,	2.20033	13.4094
Chr1	4386453	4386553	AT1G12860_3	100,	0,	4.06419	13.4094
Chr1	4390676	4391100	AT1G12880_1	105,237,	0,187,	2.82142	3.83034
Chr1	4398420	4398766	AT1G12930_1	346,	0,	8.5176	5.50531
Chr1	4405187	4405373	AT1G12930_2	18,82,	0,104,	2.01124	5.50531
Chr1	4405470	4405570	AT1G12930_3	100,	0,	2.54779	5.50531
Chr1	4424035	4424185	AT1G12970_1	150,	0,	1.94423	2.78137
Chr1	4435802	4435952	AT1G12990_1	150,	0,	4.06365	11.9314
Chr1	4436200	4436501	AT1G13000_1	301,	0,	11.494	6.06045
Chr1	4445804	4446475	AT1G13030_2	2,78,67,147,	0,121,353,524,	2.15406	3.99988
Chr1	4450692	4450793	AT1G13050_1	101,	0,	1.9048	1.11032
Chr1	4454606	4454802	AT1G13060_1	196,	0,	16.8694	43.9695
Chr1	4469242	4469490	AT1G13120_1	248,	0,	10.5942	6.68893
Chr1	4471363	4471561	AT1G13120_2	198,	0,	2.88902	6.68893
Chr1	4472090	4472339	AT1G13120_3	23,126,	0,123,	2.01251	6.68893
Chr1	4487472	4487718	AT1G13160_1	246,	0,	2.02011	9.86189
Chr1	4488183	4488528	AT1G13160_2	345,	0,	3.38219	9.86189
Chr1	4488682	4489132	AT1G13170_1	332,18,	0,432,	2.73007	8.94235
Chr1	4491867	4491968	AT1G13170_2	101,	0,	1.66378	8.94235
Chr1	4500544	4500692	AT1G13190_1	148,	0,	3.13356	12.5293
Chr1	4516819	4517393	AT1G13220_1	35,271,95,	0,119,479,	2.68189	6.21332
Chr1	4517641	4518442	AT1G13220_2	801,	0,	3.46643	6.21332
Chr1	4518541	4518641	AT1G13220_3	100,	0,	2.21081	6.21332
Chr1	4519905	4520256	AT1G13220_4	351,	0,	6.62764	6.21332
Chr1	4529576	4529775	AT1G13250_1	199,	0,	2.15397	11.9734
Chr1	4529923	4530023	AT1G13250_2	100,	0,	1.56673	11.9734
Chr1	4547074	4547274	AT1G13270_1	200,	0,	9.12549	57.5473
Chr1	4563526	4563776	AT1G13320_1	250,	0,	16.461	23.2803
Chr1	4572402	4572749	AT1G13350_1	347,	0,	6.47224	10.9489
Chr1	4575199	4575299	AT1G13350_2	100,	0,	2.38058	10.9489
Chr1	4575499	4575974	AT1G13350_3	336,60,	0,415,	7.62952	10.9489
Chr1	4589140	4589238	AT1G13380_1	98,	0,	3.86874	14.5427
Chr1	4592500	4592797	AT1G13390_1	297,	0,	2.87554	6.95579
Chr1	4612780	4613031	AT1G13450_1	251,	0,	4.56837	4.47993
Chr1	4614502	4614653	AT1G13450_2	151,	0,	1.61486	4.47993
Chr1	4615864	4615964	AT1G13460_1	100,	0,	3.89557	6.1584
Chr1	4618104	4618252	AT1G13460_2	148,	0,	5.10676	6.1584
Chr1	4620390	4620682	AT1G13470_1	292,	0,	4.63738	45.2859
Chr1	4638616	4638815	AT1G13560_1	199,	0,	14.5779	25.5577
Chr1	4680485	4680780	AT1G13650_1	295,	0,	2.72108	7.3085
Chr1	4694074	4694362	AT1G13690_1	288,	0,	6.96362	14.0299
Chr1	4711122	4711220	AT1G13730_1	98,	0,	1.39444	14.3719
Chr1	4712182	4712574	AT1G13730_2	392,	0,	4.85104	14.3719
Chr1	4714323	4714423	AT1G13740_1	100,	0,	1.92809	5.92509
Chr1	4714763	4715011	AT1G13740_2	248,	0,	2.74954	5.92509
Chr1	4715442	4715542	AT1G13750_1	100,	0,	8.63939	7.40628
Chr1	4728900	4729432	AT1G13790_1	29,69,247,	0,114,285,	3.66238	2.15881
Chr1	4729840	4730376	AT1G13790_2	61,384,	0,152,	5.03296	2.15881
Chr1	4737520	4737861	AT1G13820_1	341,	0,	12.4582	30.9881
Chr1	4747329	4747474	AT1G13870_1	145,	0,	11.0732	9.43328
Chr1	4778271	4778504	AT1G13960_1	145,6,	0,227,	2.26422	4.93788
Chr1	4794354	4794554	AT1G13980_1	200,	0,	3.8876	6.30749
Chr1	4796453	4796551	AT1G13990_1	98,	0,	20.6041	8.1347
Chr1	4799989	4800234	AT1G14000_1	245,	0,	9.09927	27.1396
Chr1	4800216	4800410	AT1G14010_1	194,	0,	17.6102	19.0918
Chr1	4804257	4804357	AT1G14020_1	100,	0,	1.99006	8.19646
Chr1	4805078	4805375	AT1G14020_2	297,	0,	9.35959	8.19646
Chr1	4805354	4805502	AT1G14030_1	148,	0,	8.65849	17.6673
Chr1	4817174	4817421	AT1G14060_1	247,	0,	3.20104	7.54653
Chr1	4843281	4843626	AT1G14170_1	217,30,	0,315,	3.3023	7.94456
Chr1	4854513	4854755	AT1G14200_1	242,	0,	1.84418	7.05791
Chr1	4856824	4856968	AT1G14210_1	144,	0,	2.38299	6.34234
Chr1	4857062	4857283	AT1G14210_2	120,23,	0,198,	2.10139	6.34234
Chr1	4863894	4863994	AT1G14230_1	100,	0,	7.53607	5.66403
Chr1	4871243	4871439	AT1G14250_1	196,	0,	5.94946	7.30204
Chr1	4874923	4875072	AT1G14270_1	149,	0,	20.9133	31.0825
Chr1	4880128	4880277	AT1G14290_1	149,	0,	11.3911	6.68781
Chr1	4882483	4882633	AT1G14300_1	150,	0,	8.03648	5.06348
Chr1	4886491	4886744	AT1G14310_1	10,139,	0,114,	6.24483	8.32224
Chr1	4889411	4889558	AT1G14320_1	147,	0,	5.86527	257.454
Chr1	4898744	4898938	AT1G14340_1	194,	0,	11.4613	7.40636
Chr1	4899236	4899333	AT1G14345_1	97,	0,	4.37888	110.118
Chr1	4908269	4908822	AT1G14350_1	250,47,3,	0,337,550,	4.69568	8.95115
Chr1	4911237	4911335	AT1G14360_1	98,	0,	9.69969	15.5932
Chr1	4918058	4918257	AT1G14380_1	199,	0,	9.52959	9.63972
Chr1	4927082	4927331	AT1G14400_1	249,	0,	11.7369	35.2326
Chr1	4929169	4929319	AT1G14410_1	150,	0,	4.97269	20.5912
Chr1	4939148	4939297	AT1G14440_1	149,	0,	1.61614	4.62957
Chr1	4939445	4939594	AT1G14440_2	149,	0,	1.79913	4.62957
Chr1	4946284	4947343	AT1G14450_1	204,31,	0,1028,	7.32287	4.60131
Chr1	4951451	4951601	AT1G14460_2	150,	0,	2.33382	5.2382
Chr1	4961892	4962292	AT1G14510_1	400,	0,	2.08721	14.2718
Chr1	4968182	4968332	AT1G14520_1	150,	0,	4.99869	3.11963
Chr1	4983067	4983218	AT1G14560_1	151,	0,	4.96067	5.32289
Chr1	4987177	4987277	AT1G14570_1	100,	0,	7.20555	18.6578
Chr1	4990108	4990208	AT1G14580_1	100,	0,	2.04021	4.69712
Chr1	4991909	4992010	AT1G14580_2	101,	0,	1.47176	4.69712
Chr1	4992456	4992556	AT1G14580_3	100,	0,	2.6599	4.69712
Chr1	4998866	4999016	AT1G14590_1	150,	0,	13.487	5.7441
Chr1	5008301	5008851	AT1G14610_1	375,73,	0,477,	4.03299	27.8869
Chr1	5014772	5014970	AT1G14620_1	198,	0,	17.7223	10.6083
Chr1	5028916	5029315	AT1G14650_1	399,	0,	3.69819	11.2371
Chr1	5030496	5030746	AT1G14650_2	250,	0,	8.35878	11.2371
Chr1	5051803	5052099	AT1G14690_1	296,	0,	8.01607	9.85343
Chr1	5052196	5052532	AT1G14690_2	232,15,	0,321,	2.07632	9.85343
Chr1	5060941	5061090	AT1G14700_1	149,	0,	4.52288	12.4699
Chr1	5061942	5062241	AT1G14710_1	299,	0,	7.37699	19.3665
Chr1	5062439	5062589	AT1G14710_2	150,	0,	2.012	19.3665
Chr1	5063841	5064209	AT1G14710_3	89,62,	0,306,	3.16098	19.3665
Chr1	5065053	5065154	AT1G14710_4	101,	0,	3.06552	19.3665
Chr1	5066723	5066823	AT1G14720_1	100,	0,	7.95324	24.5499
Chr1	5075376	5075872	AT1G14740_1	496,	0,	3.56802	15.1259
Chr1	5102572	5102721	AT1G14810_1	149,	0,	12.11	55.2977
Chr1	5104552	5104652	AT1G14810_2	100,	0,	2.32096	55.2977
Chr1	5105172	5105322	AT1G14820_1	150,	0,	11.1104	10.0623
Chr1	5107513	5107759	AT1G14830_1	246,	0,	9.07813	27.6263
Chr1	5112099	5112399	AT1G14840_1	300,	0,	6.61837	13.5635
Chr1	5112635	5112880	AT1G14840_2	94,56,	0,189,	1.78252	13.5635
Chr1	5139809	5139958	AT1G14910_1	149,	0,	7.62784	12.3081
Chr1	5165636	5165932	AT1G14980_1	296,	0,	4.325	56.3694
Chr1	5167156	5167352	AT1G14990_1	196,	0,	11.0768	7.9292
Chr1	5179852	5180000	AT1G15030_1	148,	0,	13.1337	13.174
Chr1	5183631	5183878	AT1G15060_1	247,	0,	9.9835	8.3324
Chr1	5186662	5186811	AT1G15060_2	149,	0,	1.76297	8.3324
Chr1	5203845	5204145	AT1G15120_1	300,	0,	15.3442	50.9352
Chr1	5206051	5206251	AT1G15130_1	200,	0,	13.7905	11.8177
Chr1	5206349	5206500	AT1G15130_2	151,	0,	2.01965	11.8177
Chr1	5210279	5210479	AT1G15140_1	200,	0,	9.46398	78.666
Chr1	5211951	5212151	AT1G15140_2	200,	0,	2.81913	78.666
Chr1	5217014	5217248	AT1G15160_1	22,79,	0,155,	2.57436	2.88655
Chr1	5226529	5226629	AT1G15180_1	100,	0,	4.86646	9.12801
Chr1	5228397	5229019	AT1G15200_1	484,53,	0,569,	6.54761	31.5425
Chr1	5242716	5242965	AT1G15230_1	249,	0,	4.88067	10.9734
Chr1	5248542	5248693	AT1G15240_1	151,	0,	14.8783	5.75861
Chr1	5248712	5248812	AT1G15250_1	100,	0,	3.38711	13.9812
Chr1	5250697	5250841	AT1G15270_1	144,	0,	9.51448	146.548
Chr1	5252611	5253363	AT1G15280_1	324,76,	0,676,	3.37257	16.4048
Chr1	5256463	5256713	AT1G15280_2	250,	0,	12.8141	16.4048
Chr1	5275763	5276703	AT1G15340_1	940,	0,	6.73925	56.7975
Chr1	5288395	5288542	AT1G15370_1	147,	0,	10.8775	19.6308
Chr1	5295633	5295733	AT1G15390_1	100,	0,	8.54183	19.5157
Chr1	5300632	5300878	AT1G15410_1	246,	0,	4.6606	5.57338
Chr1	5301612	5301954	AT1G15420_1	342,	0,	6.47205	9.14456
Chr1	5306076	5306226	AT1G15440_1	150,	0,	11.3644	6.59901
Chr1	5308563	5308713	AT1G15440_2	150,	0,	2.90668	6.59901
Chr1	5317644	5317842	AT1G15470_1	198,	0,	5.73037	10.8562
Chr1	5328626	5328825	AT1G15500_1	199,	0,	4.96247	45.3133
Chr1	5340108	5340306	AT1G15530_1	198,	0,	4.27969	5.4308
Chr1	5341536	5341832	AT1G15530_2	296,	0,	2.4262	5.4308
Chr1	5383546	5383954	AT1G15660_1	65,70,15,	0,155,393,	2.10699	5.5727
Chr1	5384444	5384595	AT1G15660_2	151,	0,	3.87727	5.5727
Chr1	5402282	5402383	AT1G15690_1	101,	0,	2.64823	482.881
Chr1	5404426	5404723	AT1G15710_1	297,	0,	1.96984	11.1062
Chr1	5404821	5404971	AT1G15710_2	150,	0,	1.4287	11.1062
Chr1	5407450	5407649	AT1G15730_1	199,	0,	11.9443	20.5772
Chr1	5414469	5414919	AT1G15740_1	450,	0,	13.9593	7.9853
Chr1	5414866	5415116	AT1G15750_1	250,	0,	7.90355	29.5041
Chr1	5445009	5445258	AT1G15810_1	249,	0,	2.44476	12.4753
Chr1	5446316	5446564	AT1G15810_2	248,	0,	2.18732	12.4753
Chr1	5456775	5456973	AT1G15860_1	198,	0,	11.3196	13.6324
Chr1	5458494	5458786	AT1G15880_1	292,	0,	16.7841	8.5533
Chr1	5467521	5468126	AT1G15910_1	197,54,	0,551,	3.14077	9.51267
Chr1	5468224	5469130	AT1G15910_2	61,638,	0,268,	5.84358	9.51267
Chr1	5472753	5472901	AT1G15930_1	148,	0,	9.52813	103.02
Chr1	5477207	5478255	AT1G15940_1	1048,	0,	4.43327	7.51661
Chr1	5481886	5482131	AT1G15950_1	245,	0,	5.41624	16.9309
Chr1	5481911	5482257	AT1G15960_1	346,	0,	6.0749	1.40608
Chr1	5486370	5486617	AT1G15970_1	247,	0,	13.8962	8.11062
Chr1	5491117	5491265	AT1G15980_1	148,	0,	5.28785	151.071
Chr1	5495125	5495359	AT1G16000_1	234,	0,	5.41906	20.5008
Chr1	5495422	5495522	AT1G16010_1	100,	0,	6.86763	13.7632
Chr1	5501061	5501309	AT1G16020_1	248,	0,	24.2047	9.31564
Chr1	5502607	5502756	AT1G16030_1	149,	0,	2.78624	1.54955
Chr1	5506421	5506667	AT1G16040_1	246,	0,	12.7278	3.49989
Chr1	5515778	5515928	AT1G16080_1	150,	0,	7.97832	125.433
Chr1	5538814	5538914	AT1G16170_1	100,	0,	4.57845	6.08
Chr1	5542601	5542802	AT1G16180_1	201,	0,	4.77626	35.5962
Chr1	5545854	5546053	AT1G16190_1	199,	0,	11.8807	8.0937
Chr1	5546147	5546342	AT1G16210_1	195,	0,	15.3741	31.3353
Chr1	5547169	5547316	AT1G16210_2	147,	0,	1.89012	31.3353
Chr1	5555089	5555189	AT1G16240_1	100,	0,	10.0569	19.0317
Chr1	5559547	5559748	AT1G16260_1	201,	0,	3.54217	7.53195
Chr1	5564982	5565131	AT1G16270_1	149,	0,	1.57695	4.07792
Chr1	5568134	5568904	AT1G16280_1	500,90,	0,680,	3.63717	4.22293
Chr1	5587820	5588019	AT1G16340_1	199,	0,	6.36393	8.3618
[truncated: 11,749 more rows]

## Sheet: mapping_results
Samples	Replicates	Clean reads	Mapped reads	Unique reads
[truncated: 16 more rows]
