# Supplementary material for: Transcriptome-Wide Analysis of RNA m6A Methylation and Gene Expression Changes Among Two Arabidopsis Ecotypes and Their Reciprocal Hybrids
Source: Front Plant Sci. 2021 Jun 10;12:685189. doi: 10.3389/fpls.2021.685189 (PMC8222996; doi:10.3389/fpls.2021.685189)
Supplement: Supplementary Table 2 — List of DMPs between the samples. [file Table_2.XLSX]

## Sheet: Col-0 vs Ler
Peak	Enrichment		Ratio	pvalue	padj
	Col-0	Ler
AT1G01080_3	9.06889	3.54944	2.55502	5.53051e-07	1.26425e-05
AT1G01490_1	6.00603	10.2041	0.588593	2.14521e-08	6.43199e-07
AT1G01610_1	5.20019	3.17037	1.64025	0.00161898	0.0117769
AT1G01650_1	14.7443	7.57838	1.94557	0.00726902	0.039333
AT1G02130_1	13.1112	6.09342	2.1517	0.00011134	0.0013152
AT1G02140_1	22.4355	13.9894	1.60374	0.00357704	0.0222571
AT1G02150_1	6.22241	3.5166	1.76944	8.50789e-05	0.00104222
AT1G02305_1	14.2647	6.46362	2.20692	0.00394643	0.0242139
AT1G02475_2	6.38456	2.78671	2.29107	6.14273e-06	0.000107108
AT1G02780_1	11.4717	7.02832	1.63221	1.08741e-09	4.06685e-08
AT1G02840_1	18.8351	11.0035	1.71173	0.00404215	0.0246157
AT1G03150_1	7.40837	3.70235	2.00099	0.00414497	0.0250259
AT1G03400_1	9.9099	4.5587	2.17384	0.00105989	0.00840289
AT1G03600_1	5.14992	3.23726	1.59082	8.17372e-15	5.72919e-13
AT1G03680_1	8.26391	5.09771	1.6211	2.52965e-18	2.47906e-16
AT1G03930_1	13.103	5.84801	2.24059	0.000396963	0.00372469
AT1G04140_1	9.56687	5.63515	1.69771	0.00157876	0.0115958
AT1G04290_1	5.55288	2.03535	2.72822	0.00814961	0.0429559
AT1G04300_2	5.67919	2.52876	2.24584	0.00888057	0.0457605
AT1G04410_1	9.19737	5.02655	1.82976	4.63633e-25	8.31711e-23
AT1G04510_1	32.5158	11.0911	2.9317	2.16584e-05	0.000320989
AT1G04520_1	9.74931	2.88409	3.38038	0.00212775	0.014595
AT1G04530_1	7.45717	3.9017	1.91126	0.0037498	0.0231822
AT1G04620_1	8.99182	4.03504	2.22844	2.14286e-05	0.000318094
AT1G04690_1	5.26324	3.2968	1.59647	0.00310368	0.0198362
AT1G04750_1	23.7361	11.2949	2.1015	4.85322e-07	1.11909e-05
AT1G04790_2	3.63819	8.21871	0.442672	2.02885e-80	3.06762e-77
AT1G04800_1	3.64135	7.91289	0.460179	1.36683e-82	2.8933e-79
AT1G04850_1	24.9618	12.5173	1.99419	0.00205005	0.0142094
AT1G04940_1	6.06902	3.31934	1.82838	0.000510871	0.00459393
AT1G05140_1	5.09599	2.34412	2.17394	2.9508e-06	5.62726e-05
AT1G05830_2	13.9507	3.64705	3.8252	0.00543434	0.031246
AT1G05850_1	6.77758	4.03626	1.67917	7.44873e-23	1.11039e-20
AT1G05960_1	18.2489	9.00441	2.02667	0.000752896	0.00639026
AT1G06290_1	9.11789	3.51666	2.59277	0.000368538	0.00349831
AT1G06390_1	13.0904	6.70473	1.95242	0.00105626	0.00838668
AT1G06410_1	7.49521	4.72792	1.58531	0.00367033	0.0227307
AT1G06430_1	14.4742	5.29604	2.73303	3.22384e-07	7.59936e-06
AT1G06650_1	11.6129	5.46498	2.12496	5.0103e-06	8.97276e-05
AT1G06700_1	16.1714	8.21911	1.96753	0.000208024	0.00220181
AT1G06760_1	1.77854	3.6056	0.49327	1.46477e-16	1.21118e-14
AT1G06950_3	4.00959	2.14285	1.87115	8.91274e-05	0.00108678
AT1G07070_1	10.0866	4.21167	2.39491	3.62388e-05	0.000498767
AT1G07080_1	11.3524	6.61306	1.71666	0.000118659	0.00138466
AT1G07110_1	11.7389	4.93405	2.37915	5.46343e-10	2.15256e-08
AT1G07140_2	3.12727	4.92258	0.63529	5.36611e-15	3.78632e-13
AT1G07420_1	15.6185	9.00152	1.7351	0.00702672	0.0381585
AT1G07700_1	14.1052	6.43518	2.19188	0.000163363	0.00180672
AT1G07890_1	5.30477	3.42124	1.55054	4.01713e-12	2.0441e-10
AT1G07930_1	3.7013	2.4294	1.52355	4.91839e-06	8.8531e-05
AT1G07960_1	15.1973	7.62652	1.99269	0.000718786	0.00615007
AT1G08110_1	14.9551	8.68205	1.72254	0.00079299	0.00666112
AT1G08200_1	12.6289	4.5686	2.76428	3.52041e-21	4.54391e-19
AT1G08360_1	10.1092	5.77703	1.74989	9.11703e-14	5.81293e-12
AT1G08420_1	4.01604	2.31653	1.73364	0.00044394	0.00410005
AT1G08490_1	12.7315	6.99714	1.81952	0.00112207	0.00881006
AT1G08510_1	6.47192	4.02924	1.60624	7.98666e-06	0.000135466
AT1G08520_3	11.4928	6.18251	1.85892	5.96008e-08	1.63423e-06
AT1G08580_1	6.2372	4.0813	1.52824	0.00180954	0.0128798
AT1G08640_1	12.7578	7.05645	1.80796	5.50988e-07	1.26226e-05
AT1G08680_1	16.6257	5.47021	3.03932	0.00137526	0.0103379
AT1G08820_1	17.0029	8.8814	1.91444	0.00917881	0.04696
AT1G08830_1	12.8211	8.52332	1.50423	1.77058e-06	3.61075e-05
AT1G09340_1	7.18945	4.5557	1.57812	1.52522e-10	6.56223e-09
AT1G09430_1	16.4066	8.13386	2.01708	0.000903119	0.00738687
AT1G09640_1	8.5651	3.03955	2.81788	1.21251e-14	8.27951e-13
AT1G09690_1	6.06771	3.22876	1.87927	4.87652e-15	3.46396e-13
AT1G09750_1	4.7501	3.09779	1.53339	9.44164e-09	3.00091e-07
AT1G09750_2	3.39363	2.03993	1.6636	1.72492e-10	7.39132e-09
AT1G09770_4	3.13423	1.80314	1.7382	0.000821153	0.00687042
AT1G09830_2	4.96257	2.02419	2.45163	0.000780162	0.00657947
AT1G09850_1	10.4837	5.3865	1.94629	0.00319062	0.0203309
AT1G10290_2	15.4256	8.69652	1.77377	0.00688265	0.0374722
AT1G10470_1	5.27779	2.72333	1.93799	5.51493e-05	0.000721509
AT1G10490_2	13.7845	6.94492	1.98483	0.000210483	0.00221666
AT1G10590_1	9.52634	4.82213	1.97555	6.17418e-05	0.000794016
AT1G10630_1	10.6456	6.54018	1.62772	0.001076	0.00849881
AT1G10670_1	10.041	6.39771	1.56947	3.71946e-06	6.97992e-05
AT1G11310_2	3.57953	1.92108	1.86329	3.91679e-06	7.25487e-05
AT1G11430_1	10.092	6.64514	1.5187	5.58585e-06	9.83704e-05
AT1G11475_1	19.5538	10.4736	1.86696	0.00100455	0.00804245
AT1G11650_1	21.9344	12.5066	1.75382	2.44658e-06	4.7513e-05
AT1G11890_1	14.8217	6.57054	2.25578	8.11992e-05	0.00100048
AT1G12000_1	15.8488	5.46206	2.90162	9.90855e-06	0.000163352
AT1G12250_1	21.2051	9.46057	2.24142	3.15957e-05	0.000446176
AT1G12500_2	3.40685	1.75062	1.94609	0.00576217	0.0325436
AT1G12650_1	7.6087	5.0311	1.51233	0.00836522	0.0438304
AT1G12840_2	18.0018	9.87396	1.82316	2.1935e-08	6.53971e-07
AT1G13270_1	15.9947	7.4259	2.15391	2.26054e-06	4.46372e-05
AT1G13320_1	14.4647	9.2023	1.57186	0.00948655	0.0482487
AT1G13820_1	11.4078	7.29117	1.5646	0.00450347	0.0267629
AT1G14020_2	13.6151	7.02529	1.93801	0.00209636	0.0144453
AT1G14320_1	5.95586	3.8334	1.55368	1.9781e-10	8.40813e-09
AT1G14345_1	7.65107	4.1456	1.84559	6.73852e-10	2.58408e-08
AT1G14400_1	15.6748	6.71929	2.3328	5.28107e-10	2.09344e-08
AT1G14830_1	11.0663	6.07633	1.82122	0.00112078	0.0088065
AT1G15120_1	17.999	10.8205	1.66343	5.57479e-09	1.87313e-07
AT1G15140_1	10.9987	5.56778	1.97542	2.89509e-09	1.03171e-07
AT1G15140_2	4.67956	3.06391	1.52731	1.41399e-06	2.95182e-05
AT1G15860_1	16.6832	5.73572	2.90866	0.000155114	0.00172995
AT1G15930_1	13.0537	6.29382	2.07404	2.18031e-15	1.61373e-13
AT1G16000_1	8.63296	3.68018	2.3458	0.00600645	0.0336005
AT1G16180_1	6.43901	4.14937	1.55181	0.00227106	0.0154181
AT1G16210_1	12.6044	7.26244	1.73556	0.00527962	0.0305089
AT1G16210_2	1.81885	4.08904	0.44481	5.01211e-07	1.15322e-05
AT1G16280_1	6.74756	3.0397	2.21981	0.0011149	0.00877983
AT1G16460_1	15.8258	8.24449	1.91956	0.000882396	0.00725463
AT1G16720_2	7.47027	4.2008	1.7783	0.000244609	0.00250623
AT1G16740_2	11.4389	4.56059	2.50821	0.000579029	0.0051327
AT1G16880_1	5.60322	2.25482	2.48499	5.36543e-39	2.18414e-36
AT1G16890_1	11.9014	6.29506	1.89059	1.08102e-05	0.000177113
AT1G17290_1	4.22204	2.29042	1.84335	0.000151589	0.0017032
AT1G17290_2	7.57465	2.45928	3.08003	4.62215e-16	3.65081e-14
AT1G17330_1	5.87985	2.97584	1.97586	0.0061906	0.0343583
AT1G17440_3	6.83968	3.55383	1.92459	0.00124504	0.00949389
AT1G17840_1	12.6282	5.1251	2.46399	2.50213e-06	4.84142e-05
AT1G17850_1	12.1003	5.02155	2.40968	2.43644e-06	4.74031e-05
AT1G18060_1	17.1783	11.2481	1.52722	0.00106586	0.0084376
AT1G18080_1	9.99325	5.99789	1.66613	5.58245e-07	1.27338e-05
AT1G18450_1	28.4284	9.17527	3.09837	0.00474687	0.0279426
AT1G18500_1	7.42334	3.7213	1.99482	8.82987e-05	0.00107792
AT1G18720_1	4.91374	3.05088	1.6106	2.08136e-05	0.00031027
AT1G18720_2	2.9456	1.55339	1.89623	0.000348824	0.00334506
AT1G19350_1	3.00297	1.55773	1.92778	1.0223e-07	2.71178e-06
AT1G19440_1	4.22872	2.12763	1.98753	0.00805651	0.0426351
AT1G19660_1	4.33459	2.61694	1.65636	3.65845e-07	8.52885e-06
AT1G19690_1	9.93547	4.67044	2.12731	0.00717506	0.0388444
AT1G19715_1	14.2523	5.21303	2.73398	0.00161269	0.0117553
AT1G19740_1	5.64901	3.5002	1.61391	2.19878e-06	4.37441e-05
AT1G19770_1	6.65846	3.72204	1.78893	2.13329e-05	0.000317117
AT1G19910_1	8.0059	3.73946	2.14093	2.79033e-07	6.66655e-06
AT1G19920_1	9.21084	4.94237	1.86365	0.000504146	0.00454504
AT1G19920_2	4.23	2.03638	2.07721	5.15625e-06	9.14134e-05
AT1G20090_1	6.8073	3.61736	1.88184	1.73803e-05	0.000267374
AT1G20110_1	4.65037	2.37652	1.9568	2.2726e-05	0.000334537
AT1G20225_1	17.5485	6.25888	2.80377	3.03153e-06	5.77081e-05
AT1G20260_1	24.9296	15.2837	1.63112	6.40598e-06	0.000111332
AT1G20340_1	6.15365	3.11141	1.97777	5.06644e-237	5.36232e-233
AT1G20510_1	12.6732	5.28215	2.39925	0.000401328	0.00375234
AT1G20630_1	16.6843	8.31933	2.00548	0.000912248	0.00743893
AT1G20696_1	3.79681	1.94622	1.95086	2.2944e-06	4.49703e-05
AT1G20810_1	12.8522	7.80629	1.64639	0.000116727	0.00136936
AT1G21310_1	7.84078	3.87723	2.02226	3.2937e-13	1.91541e-11
AT1G21310_2	9.06787	4.20614	2.15587	1.19634e-11	5.67804e-10
AT1G21500_1	2.95601	1.95121	1.51496	1.33508e-08	4.12513e-07
AT1G21640_1	23.818	8.19022	2.9081	7.43412e-05	0.000925679
AT1G21650_1	25.0382	7.86983	3.18154	6.88686e-05	0.000867744
AT1G21900_1	10.5776	5.47445	1.93217	0.0013634	0.0102779
AT1G22280_1	6.1692	3.97753	1.55101	0.00161896	0.0117769
AT1G22410_1	13.5745	5.09679	2.66334	6.36504e-05	0.000812637
AT1G22430_1	12.8883	5.00216	2.57654	0.000354863	0.00339284
AT1G22450_1	8.61147	5.57006	1.54603	0.00348491	0.0218121
AT1G22520_1	12.6301	5.73375	2.20276	0.00115131	0.00897973
AT1G22530_1	5.12729	2.19099	2.34017	0.000152569	0.0017102
AT1G22840_1	19.0488	8.94592	2.12932	2.68399e-08	7.84734e-07
AT1G22850_2	5.55915	2.42773	2.28986	3.9753e-09	1.3886e-07
AT1G23190_1	14.0864	8.59708	1.63851	0.000538665	0.0048193
AT1G23360_1	18.9406	8.18078	2.31526	0.00172412	0.0124137
AT1G23400_1	11.9627	6.2296	1.9203	0.000245008	0.00250789
AT1G23400_2	4.9515	2.52358	1.9621	0.00959104	0.0486866
AT1G23820_1	11.7532	7.51123	1.56475	0.000891823	0.00730577
AT1G23950_1	14.7213	6.43903	2.28626	0.00682674	0.0372232
AT1G23960_1	7.66278	3.92461	1.9525	0.000913703	0.00743895
AT1G24267_1	15.9449	7.18893	2.21798	0.00307995	0.0197331
AT1G24340_1	14.3842	5.69924	2.52388	0.0098913	0.0499235
AT1G24350_2	12.9251	4.65108	2.77895	0.00126689	0.00961888
AT1G25260_1	15.5102	7.57793	2.04675	0.000242213	0.00248409
AT1G26110_2	2.0359	1.25509	1.62212	0.00604224	0.0337295
AT1G26150_2	10.0478	4.75012	2.11527	8.93621e-07	1.91405e-05
AT1G26150_3	7.88289	4.23747	1.86028	0.00939293	0.0478416
AT1G26180_1	13.7367	5.29632	2.59363	0.00474963	0.0279434
AT1G26340_1	15.2723	4.43331	3.44491	0.00734737	0.0396556
AT1G26550_1	25.314	13.1475	1.92538	2.06375e-07	5.1154e-06
AT1G26630_1	4.66782	2.82918	1.64989	4.83845e-24	8.39511e-22
AT1G26670_1	15.2504	6.6037	2.30937	0.00115505	0.00900137
AT1G26850_1	14.0415	7.22786	1.94269	0.00456744	0.0270823
AT1G26880_1	10.4708	6.46344	1.62001	1.64816e-07	4.17324e-06
AT1G27000_1	27.2579	14.2479	1.91312	0.000504598	0.00454524
AT1G27320_3	10.9143	6.12488	1.78196	0.000256266	0.00260265
AT1G27530_1	22.3753	10.0243	2.23211	4.36143e-05	0.000588793
AT1G27970_2	7.41401	3.79144	1.95546	0.000782159	0.00659106
AT1G28140_1	10.2669	5.68319	1.80653	4.19659e-08	1.18129e-06
AT1G28280_3	3.37676	2.16491	1.55977	0.00531945	0.0306985
AT1G28290_2	6.08246	3.89767	1.56054	7.74159e-06	0.000131944
AT1G28510_2	22.0942	9.2487	2.38889	0.00557693	0.0318029
AT1G29070_1	10.1636	5.03301	2.0194	7.12491e-24	1.21629e-21
AT1G29390_1	12.8702	7.29506	1.76423	0.000480058	0.00436131
AT1G29700_1	13.6126	7.68054	1.77235	0.000108934	0.00129318
AT1G29890_1	17.478	7.17479	2.43604	0.000321737	0.00316768
AT1G30230_1	8.9408	4.97141	1.79844	6.22034e-10	2.40278e-08
AT1G30630_1	9.76925	4.41269	2.2139	7.78096e-09	2.50315e-07
AT1G31130_1	5.54178	2.87663	1.92648	4.6707e-05	0.000623389
AT1G31180_1	7.78604	3.91109	1.99076	0.0024792	0.0165536
AT1G31330_1	4.68687	2.63346	1.77974	3.65673e-104	1.93514e-100
AT1G31812_1	8.71417	5.13208	1.69798	7.3924e-13	4.16176e-11
AT1G31940_1	9.25545	3.89882	2.37391	0.00467204	0.0275635
AT1G32060_2	7.22823	4.74037	1.52482	6.21303e-18	5.87131e-16
AT1G32070_2	6.10983	2.66067	2.29635	0.000146877	0.00166084
AT1G32200_2	7.81229	3.47838	2.24595	2.22949e-06	4.4189e-05
AT1G32210_1	18.562	9.44785	1.96467	0.000235174	0.00242838
AT1G32310_1	16.2456	5.47012	2.96988	0.00570967	0.0322988
AT1G32500_1	18.8775	9.47615	1.99211	0.000120189	0.00139942
AT1G32550_1	16.1028	10.6909	1.50622	6.57079e-06	0.000113636
AT1G32580_1	3.781	1.81558	2.08253	0.00348382	0.0218121
AT1G32700_2	13.6821	3.75252	3.6461	0.000912997	0.00743893
AT1G32790_1	14.7721	8.62345	1.71302	0.00358985	0.0223106
AT1G32990_1	4.92803	2.23585	2.2041	3.14275e-22	4.43505e-20
AT1G32990_2	5.76458	3.70433	1.55617	2.23993e-16	1.80973e-14
AT1G33120_1	14.8379	7.60982	1.94983	1.00669e-18	1.07625e-16
AT1G33140_1	8.484	5.336	1.58996	1.05586e-15	8.09799e-14
AT1G33240_1	5.52218	2.59849	2.12515	0.00356314	0.0221968
AT1G33240_5	5.68562	3.07102	1.85138	0.00969621	0.0491027
AT1G33265_1	14.3184	7.82191	1.83055	0.00923381	0.0471673
AT1G33490_1	14.3416	5.36735	2.67201	0.00141527	0.0105935
AT1G33680_2	13.3691	5.30588	2.51968	0.00239658	0.0161358
AT1G34030_1	7.73665	5.10915	1.51427	3.22283e-05	0.000453597
AT1G34130_1	12.723	6.82745	1.8635	0.00199176	0.0138598
AT1G34430_1	11.1132	5.35517	2.07523	8.40301e-07	1.82676e-05
AT1G34770_1	6.67089	2.02956	3.28686	0.00599571	0.0335937
AT1G35160_1	13.7304	7.45124	1.8427	3.8958e-06	7.23389e-05
AT1G35680_1	2.22408	1.29116	1.72255	4.6124e-21	5.88165e-19
AT1G36980_1	17.3471	7.21967	2.40276	5.97828e-11	2.69252e-09
AT1G42480_1	9.2825	5.62023	1.65162	0.00159603	0.0116736
AT1G42960_2	8.44511	5.53285	1.52636	0.00120745	0.00928756
AT1G43130_1	11.4854	6.77743	1.69466	0.00690108	0.0375533
AT1G43190_1	15.9342	8.32422	1.9142	0.00739084	0.0397887
AT1G43560_2	2.2732	1.23587	1.83935	1.92129e-05	0.000290084
AT1G44446_1	8.76106	4.68451	1.87022	0.00714979	0.0387779
AT1G44820_1	7.16299	3.37314	2.12354	0.00112043	0.0088065
AT1G44835_1	13.2949	6.72059	1.97824	0.00405383	0.0246727
AT1G45230_1	12.2044	6.59148	1.85155	4.93493e-06	8.8678e-05
AT1G45474_1	12.629	5.62197	2.24637	1.07334e-14	7.42498e-13
AT1G47200_2	6.29202	3.60176	1.74693	0.00633843	0.0350684
AT1G47240_1	11.9157	4.7562	2.5053	0.00913472	0.0468193
AT1G47490_2	25.0728	11.8781	2.11085	0.00124064	0.00946714
AT1G47710_1	4.04844	2.05888	1.96633	0.00276057	0.018058
AT1G47740_2	17.4665	7.31848	2.38662	0.000262754	0.00264604
AT1G48210_1	12.3259	3.61107	3.41337	4.31209e-10	1.75535e-08
AT1G48350_1	7.10821	3.85355	1.84459	3.65207e-23	5.76918e-21
AT1G48440_1	14.2333	5.47019	2.60197	1.76019e-06	3.60346e-05
AT1G48450_1	9.93278	6.53064	1.52095	0.00160525	0.0117208
AT1G48620_2	7.09427	3.88536	1.8259	0.00245338	0.0164077
AT1G48830_1	8.51878	4.87729	1.74662	1.6163e-06	3.32819e-05
AT1G49140_1	4.17605	2.61043	1.59976	0.00101513	0.00811489
AT1G49300_1	19.1157	8.01998	2.38351	5.87862e-06	0.000102842
AT1G49380_1	18.0403	9.83418	1.83445	0.000231879	0.00240373
AT1G49410_1	18.0991	9.76543	1.85338	0.000558483	0.00497977
AT1G49510_1	9.24206	3.82576	2.41575	0.000945771	0.00764125
AT1G49720_1	13.0312	7.11946	1.83036	0.00153889	0.0113661
AT1G49750_1	7.29287	4.26588	1.70958	3.92916e-27	9.24139e-25
AT1G49975_2	4.5658	2.92798	1.55937	0.000388491	0.00365579
AT1G50200_1	6.64701	4.17634	1.59159	0.00035247	0.00337605
AT1G50320_1	10.2975	4.99102	2.0632	9.08383e-12	4.37015e-10
AT1G50430_1	22.6703	13.0442	1.73796	0.000387139	0.00364869
AT1G50440_1	9.16373	5.6458	1.62311	0.00495702	0.0288905
AT1G50600_2	3.75789	1.34573	2.79244	0.00425086	0.0255196
AT1G50670_1	21.442	10.2653	2.08878	0.00459705	0.0272273
AT1G51070_1	9.48678	4.36189	2.17492	0.000106576	0.00127601
AT1G51110_1	10.1777	6.42365	1.58441	0.00129841	0.00982297
AT1G51200_1	6.6572	3.61727	1.84039	3.70527e-12	1.89452e-10
AT1G51390_1	6.07721	2.58275	2.35301	0.000911486	0.00743893
AT1G51610_2	6.15806	3.62484	1.69885	0.00123916	0.00946714
AT1G51680_1	4.57801	2.72613	1.67931	0.000339396	0.00328953
AT1G51730_1	11.9843	6.16262	1.94467	0.000199005	0.00212969
AT1G51730_2	2.1296	3.73734	0.569817	2.01741e-05	0.00030244
AT1G51805_1	4.43388	1.68923	2.62479	0.00017723	0.00193582
AT1G51940_1	19.6064	7.82272	2.50634	0.000344806	0.00332977
AT1G51980_1	15.808	7.77386	2.03348	6.38394e-09	2.10491e-07
AT1G52590_1	12.3881	4.61769	2.68275	5.23087e-08	1.43801e-06
AT1G52600_1	12.8471	5.36839	2.3931	0.000860995	0.0071305
AT1G52670_1	12.5637	7.55279	1.66345	0.00825582	0.0433215
AT1G52740_1	17.4759	8.73082	2.00164	1.12932e-06	2.39055e-05
AT1G52980_1	3.65965	9.7606	0.374941	0.000380643	0.00359066
AT1G53240_1	12.8933	6.87392	1.87569	1.39027e-14	9.43245e-13
AT1G53300_1	4.53883	2.49154	1.82169	0.00828471	0.0434516
AT1G53310_1	9.36414	5.68711	1.64656	0.00391251	0.0240616
AT1G53320_1	13.6435	5.89848	2.31306	0.000239162	0.00245756
AT1G53510_1	7.57868	4.32512	1.75225	5.41411e-06	9.5505e-05
AT1G53670_1	10.7275	6.09295	1.76064	0.00194608	0.0136406
AT1G53750_2	10.9164	6.9202	1.57747	0.000132018	0.00152044
AT1G54080_1	9.47839	4.68116	2.02479	2.77278e-07	6.63962e-06
AT1G54140_1	12.2225	5.23281	2.33574	0.00676385	0.0369204
AT1G54170_1	4.49138	2.39866	1.87246	0.00866877	0.044949
AT1G54310_1	23.867	9.9363	2.402	0.00125441	0.00955156
AT1G54360_1	8.52397	5.30764	1.60598	0.00180021	0.0128392
AT1G54500_1	4.6452	2.26192	2.05365	4.82742e-16	3.7847e-14
AT1G54520_1	15.2384	9.6036	1.58674	3.87586e-05	0.000527277
AT1G54580_1	11.1251	6.87442	1.61833	6.49749e-07	1.46007e-05
AT1G54630_1	8.57935	5.54991	1.54585	1.68667e-06	3.45963e-05
AT1G54680_1	4.29271	1.63254	2.62948	0.00784621	0.041857
AT1G54780_1	4.29938	2.4447	1.75866	1.07563e-20	1.32378e-18
AT1G54820_1	3.72955	2.31424	1.61157	0.00120409	0.0092752
AT1G54920_1	13.2089	6.36853	2.07409	0.00553635	0.0316397
AT1G54990_1	3.81096	1.56974	2.42777	0.000146374	0.00165869
AT1G55000_1	12.7456	6.13419	2.0778	0.00211921	0.0145553
AT1G55090_1	20.4113	6.84319	2.98271	0.000837298	0.00698342
AT1G55840_1	6.32493	2.559	2.47164	6.41973e-08	1.7467e-06
AT1G55900_1	16.2967	6.38715	2.55148	0.00799778	0.0424091
AT1G56000_1	13.9368	7.54357	1.8475	0.00484221	0.0282993
AT1G56050_1	19.5065	8.26128	2.3612	0.000776941	0.00656276
AT1G56070_1	8.46617	4.87396	1.73702	1.94083e-19	2.16229e-17
AT1G56190_1	3.22205	1.69625	1.89951	1.47542e-08	4.5395e-07
AT1G56190_3	5.56301	3.52458	1.57835	1.49517e-07	3.84099e-06
AT1G56300_1	5.9107	3.01312	1.96165	6.67976e-06	0.000115332
AT1G56330_1	12.8846	6.53117	1.97279	2.22035e-10	9.36263e-09
AT1G56450_1	13.0988	7.80184	1.67893	0.00117992	0.00912889
AT1G56500_1	13.9977	4.09505	3.41819	2.29913e-09	8.33897e-08
AT1G57680_1	7.25768	4.68816	1.54809	0.00266881	0.0175445
AT1G57870_1	11.3517	2.54656	4.45765	2.3594e-12	1.23014e-10
AT1G58080_1	14.9726	4.67726	3.20115	4.73531e-10	1.91292e-08
AT1G58250_1	19.4841	7.08977	2.7482	0.00892958	0.0459682
AT1G58602_3	9.29326	5.3293	1.74381	0.00481639	0.0282576
AT1G59610_2	15.2742	6.88362	2.21891	0.000337005	0.00327235
AT1G59960_2	4.46436	2.05028	2.17744	0.00230386	0.0155908
AT1G60000_1	3.6774	2.10271	1.74889	0.00020841	0.00220361
AT1G60070_1	11.7891	6.98313	1.68823	8.17327e-05	0.00100411
AT1G60220_1	14.9893	7.87123	1.90431	0.00617303	0.0342967
AT1G60710_1	6.75601	2.54173	2.65804	0.00107071	0.00846334
AT1G60780_1	15.0774	7.98086	1.8892	3.11851e-05	0.000441518
AT1G61740_1	5.16186	2.92634	1.76393	3.30353e-07	7.7699e-06
AT1G61780_1	8.53724	4.33613	1.96886	0.00148297	0.0110223
AT1G61790_2	8.5535	2.42299	3.53014	5.04646e-06	9.00704e-05
AT1G62040_1	9.16768	3.84285	2.38564	0.00355958	0.0221876
AT1G62740_4	9.38672	6.00775	1.56243	2.47108e-05	0.000361242
AT1G63460_1	27.0961	9.55226	2.83662	0.00115872	0.00900137
AT1G63610_1	12.4245	7.17441	1.73178	0.00168155	0.0121568
AT1G63660_1	14.1853	6.43882	2.20309	0.00252414	0.0167853
AT1G63700_1	6.9064	3.19843	2.15931	0.00922726	0.0471566
AT1G63770_1	18.651	10.0036	1.86443	2.12932e-07	5.25331e-06
AT1G63830_1	6.75081	3.46169	1.95015	0.000943043	0.0076252
AT1G64090_1	6.06068	4.01229	1.51053	0.00104737	0.00832858
AT1G64230_1	7.45963	4.31481	1.72884	7.94252e-06	0.000134934
AT1G64650_1	23.8648	9.69635	2.46122	4.51176e-06	8.21902e-05
AT1G64680_1	1.64826	2.48982	0.662001	4.74389e-05	0.000632359
AT1G64860_1	8.16295	4.45545	1.83213	4.74106e-09	1.62393e-07
AT1G65230_1	8.01907	4.46763	1.79493	1.01249e-05	0.000166659
AT1G65260_2	13.5553	8.98213	1.50914	1.55569e-06	3.22219e-05
AT1G65430_1	19.4136	8.13753	2.38569	0.0035076	0.0219282
AT1G65720_2	3.08767	1.81042	1.7055	2.86844e-07	6.82237e-06
AT1G66070_1	20.5038	11.5342	1.77765	0.00520212	0.0301529
AT1G66330_1	12.9107	5.45751	2.36568	0.000359201	0.00342503
AT1G66580_1	8.79622	5.33718	1.6481	0.000366713	0.00348803
AT1G66970_1	9.30809	4.71342	1.97481	5.5273e-23	8.47839e-21
AT1G67350_1	14.6537	8.81089	1.66313	0.000118501	0.00138435
AT1G67730_1	4.038	1.90912	2.11511	3.77873e-05	0.00051672
AT1G67740_1	4.89581	3.1821	1.53855	4.76174e-79	5.5998e-76
AT1G67870_1	5.67211	10.1469	0.558997	5.47164e-31	1.60866e-28
AT1G67950_1	7.71007	4.34796	1.77326	0.00570387	0.0322988
AT1G68190_1	8.36262	3.3379	2.50535	0.000210929	0.00221916
AT1G68260_1	15.6996	5.67782	2.76507	0.000112768	0.00132762
AT1G68490_3	4.47443	2.23856	1.9988	0.0018698	0.0132021
AT1G68590_1	5.80229	2.85923	2.02932	7.43522e-44	3.74735e-41
AT1G68720_2	16.9742	6.54538	2.59331	0.00756491	0.0405608
AT1G69410_1	2.52261	1.38692	1.81886	0.00465151	0.0274883
AT1G69690_2	3.42546	1.56901	2.18319	0.000462522	0.0042274
AT1G69740_1	13.5339	8.35712	1.61945	5.16161e-10	2.06153e-08
AT1G69830_1	23.3263	12.2138	1.90983	3.52978e-05	0.000490278
AT1G69960_1	8.24887	4.3238	1.90778	0.00745149	0.0400541
AT1G70060_1	27.4598	10.1408	2.70786	0.00105973	0.00840289
AT1G70310_1	13.3136	7.10575	1.87364	0.00325092	0.0205911
AT1G70330_1	3.25571	1.61085	2.02112	0.00696584	0.0378667
AT1G70410_1	9.53642	5.38701	1.77026	1.4813e-07	3.81463e-06
AT1G70490_1	11.6775	6.72845	1.73554	6.32801e-09	2.09299e-07
AT1G70730_1	8.85246	5.21192	1.6985	0.00195037	0.0136526
AT1G70760_1	8.82335	5.61735	1.57073	4.48694e-09	1.5469e-07
AT1G70770_1	7.9914	5.32711	1.50014	5.51157e-10	2.15256e-08
AT1G70900_1	11.3739	5.16644	2.2015	0.00103785	0.00827154
AT1G71180_2	9.11665	4.60439	1.97999	0.00556144	0.03174
AT1G71190_1	13.06	6.05231	2.15785	0.00842538	0.0439932
AT1G71220_1	16.8468	8.5173	1.97795	3.04318e-05	0.000433499
AT1G71480_1	15.1566	7.18562	2.10929	0.000239414	0.00245777
AT1G71980_1	3.84961	2.08238	1.84865	0.00171993	0.0124004
AT1G72370_1	14.508	9.252	1.5681	2.29355e-09	8.33897e-08
AT1G72430_1	4.78457	2.0605	2.32205	0.00013522	0.00155002
AT1G72550_1	21.644	11.3264	1.91093	0.00230216	0.0155908
AT1G72640_1	3.04632	2.03067	1.50015	5.45166e-05	0.000714998
AT1G72710_1	19.7399	12.184	1.62015	0.000334902	0.00325733
AT1G72750_1	5.11266	2.48872	2.05434	0.000634424	0.00553565
AT1G73110_1	12.4362	6.54514	1.90006	0.000788612	0.00663488
AT1G73470_1	11.1696	6.77952	1.64755	0.00586992	0.0330816
AT1G74040_1	4.89976	2.81331	1.74164	0.00516538	0.0299892
AT1G74070_2	3.01208	4.6096	0.653436	1.10894e-08	3.48278e-07
AT1G74270_1	11.3855	6.68039	1.70432	0.000581402	0.00514942
AT1G74340_1	19.3475	9.59137	2.01718	0.000138652	0.00158305
AT1G74640_2	13.6032	7.04282	1.93151	0.00347228	0.0217625
AT1G74690_1	8.2573	4.52204	1.82601	0.00382232	0.0235754
AT1G74910_1	11.4307	5.33176	2.14389	7.86886e-09	2.52376e-07
AT1G74920_1	11.138	6.87021	1.6212	0.0030139	0.0194033
AT1G74970_1	7.77591	4.89854	1.5874	1.22759e-09	4.57495e-08
AT1G75330_1	17.6169	11.0078	1.6004	0.00657297	0.0360832
AT1G75380_1	5.30925	2.47444	2.14564	1.57612e-08	4.82127e-07
AT1G75460_1	3.08537	1.86672	1.65284	2.65351e-11	1.23721e-09
AT1G75510_1	10.4506	4.87046	2.1457	0.000334337	0.0032554
AT1G75630_1	15.6929	6.52484	2.40509	3.08994e-05	0.000438978
AT1G75690_1	8.81373	5.02835	1.75281	2.84819e-08	8.28167e-07
AT1G75690_2	2.8443	1.77421	1.60314	6.29634e-07	1.41788e-05
AT1G75850_1	13.8549	5.75049	2.40934	0.00821157	0.043175
AT1G75950_1	7.82168	5.12636	1.52578	0.00032325	0.00317667
AT1G76010_1	10.6488	6.01039	1.77174	2.94879e-06	5.62726e-05
AT1G76080_1	5.21357	2.99558	1.74042	2.03559e-08	6.13809e-07
AT1G76100_1	4.11896	2.24115	1.83787	1.10084e-07	2.884e-06
AT1G76140_2	19.2063	9.27387	2.07101	0.0019276	0.0135469
AT1G76200_1	21.5716	14.253	1.51347	0.000126686	0.00147183
AT1G76450_1	7.49609	3.49804	2.14294	8.52859e-07	1.83469e-05
AT1G76490_1	2.55448	1.4966	1.70685	3.62306e-06	6.81109e-05
AT1G76490_2	4.04501	2.44424	1.65492	4.20442e-07	9.75868e-06
AT1G76670_1	8.07272	4.63196	1.74283	0.000347246	0.0033426
AT1G76850_2	18.5474	7.91062	2.34462	0.000835111	0.00697068
AT1G76930_1	8.45683	4.39596	1.92377	1.84351e-05	0.00028034
AT1G76930_2	6.47287	3.42522	1.88977	0.00170018	0.0122747
AT1G76990_1	5.98649	3.59608	1.66473	0.00745051	0.0400541
AT1G77090_1	15.3292	8.53887	1.79522	0.000144162	0.00163897
AT1G77940_1	6.18564	2.97434	2.07967	1.23229e-11	5.82258e-10
AT1G78140_1	9.56657	3.95683	2.41773	0.000343211	0.00331882
AT1G78490_1	6.01413	2.14426	2.80476	0.00205395	0.0142271
AT1G78620_1	21.4154	11.1627	1.91848	9.58797e-05	0.00116375
AT1G78680_1	7.85246	5.02532	1.56258	0.00113465	0.00887592
AT1G78870_1	20.5155	9.65634	2.12457	0.000915111	0.00744469
AT1G78890_2	6.31332	3.28507	1.92182	0.002196	0.0149952
AT1G78900_1	9.16629	4.87109	1.88177	1.1131e-20	1.35414e-18
AT1G78915_1	18.637	9.95655	1.87184	2.54536e-05	0.000370565
AT1G79010_1	19.9773	12.3178	1.62182	0.000175106	0.00191657
AT1G79110_1	6.35828	2.30361	2.76014	0.000943064	0.0076252
AT1G79210_1	22.638	11.2566	2.01109	0.000377001	0.00356266
AT1G79380_1	15.5504	8.10008	1.91979	0.00137431	0.0103379
AT1G79500_1	21.5133	10.6247	2.02483	0.00163108	0.0118404
AT1G79530_1	19.7384	4.71256	4.18846	7.65802e-05	0.000947982
AT1G79550_1	5.72472	3.22182	1.77686	8.35443e-06	0.000140801
AT1G79600_1	16.5031	8.94907	1.84411	3.61088e-05	0.000497625
AT1G79750_1	12.9987	6.71168	1.93673	7.71184e-09	2.48848e-07
AT1G80030_1	11.6024	7.64757	1.51714	0.00168873	0.0122004
AT1G80070_1	12.5097	7.39431	1.69181	0.00126482	0.00961011
AT1G80230_1	14.553	6.84465	2.12619	7.86339e-05	0.000972268
AT1G80480_1	12.965	7.54203	1.71904	7.90653e-10	2.98867e-08
AT1G80560_1	9.67746	6.18987	1.56344	0.00522519	0.0302204
AT1G80600_1	9.19802	5.58917	1.64569	1.80407e-05	0.00027553
AT1G80860_1	13.8241	3.42498	4.03626	0.00559432	0.0318849
AT2G01110_1	16.5216	7.816	2.11382	2.21188e-13	1.32263e-11
AT2G01220_1	28.4519	13.5058	2.10665	0.00318514	0.0203082
AT2G01290_2	5.56961	1.89649	2.9368	0.000254852	0.0025961
AT2G01320_1	21.9571	10.4957	2.09201	0.000343358	0.00331882
AT2G01340_1	22.5314	12.249	1.83946	0.00657922	0.0360987
AT2G01350_1	16.6184	9.03632	1.83907	0.00192341	0.0135404
AT2G01420_2	3.33068	1.95859	1.70055	0.00807001	0.0426425
AT2G01420_3	4.06451	1.95865	2.07515	0.00347287	0.0217625
AT2G01450_1	7.16311	3.25378	2.20147	0.000277642	0.00277747
AT2G01470_1	15.6142	7.119	2.19331	0.00161809	0.0117769
AT2G01570_1	6.88746	3.20703	2.14761	0.00174338	0.0125013
AT2G01680_2	10.895	4.66133	2.33732	0.000654781	0.0056945
AT2G01690_1	13.7122	6.19585	2.21312	7.49484e-06	0.000128358
AT2G01720_1	20.043	9.22622	2.1724	0.000149864	0.0016892
AT2G01820_2	5.0344	2.58472	1.94776	0.00466472	0.0275489
AT2G02390_2	27.9147	9.86811	2.82878	0.000629204	0.00550371
AT2G02500_1	15.7479	9.67493	1.6277	0.00154836	0.0114171
AT2G02760_1	10.79	5.01101	2.15325	4.87406e-17	4.16025e-15
AT2G03350_2	2.49411	1.51505	1.64622	0.000469923	0.00428395
AT2G03680_1	7.23883	4.57271	1.58305	1.79089e-06	3.63676e-05
AT2G03690_1	21.19	7.85073	2.69911	3.0454e-06	5.7868e-05
AT2G04360_1	16.3759	7.17293	2.28301	3.79013e-06	7.06245e-05
AT2G04390_1	8.65635	5.22458	1.65685	5.08883e-05	0.000671573
AT2G04690_1	13.7913	6.59508	2.09116	0.000926508	0.00752583
AT2G04900_1	11.9361	6.56163	1.81908	0.000259469	0.00262294
AT2G05220_1	5.78884	2.97916	1.94311	1.33589e-13	8.3171e-12
AT2G05310_1	5.32705	3.50467	1.51999	0.000134683	0.00154776
AT2G05710_1	3.90289	1.77078	2.20405	5.08374e-12	2.52612e-10
AT2G05710_2	12.0227	6.02111	1.99676	2.29324e-06	4.49703e-05
AT2G05810_2	6.4372	4.15044	1.55097	0.00597952	0.0335563
AT2G05840_1	6.91312	4.27238	1.6181	0.00876668	0.0453059
AT2G05920_1	8.70062	4.08691	2.1289	1.08928e-07	2.86791e-06
AT2G06530_1	9.17445	4.94574	1.85502	0.000497575	0.00448963
AT2G11520_1	12.0602	5.06974	2.37885	0.0039547	0.0242506
AT2G11890_1	6.99974	4.0618	1.72331	0.000166657	0.00183407
AT2G14045_1	14.291	3.22016	4.43797	5.80889e-09	1.93338e-07
AT2G14170_1	23.1529	10.7874	2.14629	0.00809854	0.0427719
AT2G14720_1	21.2086	12.1404	1.74695	0.0024818	0.0165536
AT2G14890_1	5.80581	3.84914	1.50834	1.08632e-12	5.9266e-11
AT2G14890_2	6.56918	3.7262	1.76297	1.05703e-06	2.24652e-05
AT2G14910_1	11.9918	5.65876	2.11916	1.44952e-10	6.31349e-09
AT2G15000_2	3.7538	1.91502	1.96019	0.000652102	0.00567586
AT2G15240_1	22.7451	10.0039	2.27363	0.00139543	0.0104672
AT2G15280_1	13.4675	5.56527	2.41993	0.000410988	0.00382577
AT2G15290_1	20.5344	10.8473	1.89304	2.27947e-05	0.000335083
AT2G15290_2	6.03261	2.79137	2.16116	1.33937e-06	2.80712e-05
AT2G16510_1	7.70052	4.68176	1.64479	0.000547356	0.00489292
AT2G16930_1	9.76335	4.0732	2.39697	0.00125772	0.00956988
AT2G17340_1	12.5999	6.82901	1.84505	0.00584843	0.032978
AT2G17560_1	6.96489	4.43435	1.57067	1.3569e-05	0.000214669
AT2G17840_2	1.80492	2.79802	0.645073	0.000118909	0.00138605
AT2G17840_3	3.95739	2.1888	1.80802	0.00866299	0.044949
AT2G17870_2	2.01827	3.11937	0.647013	0.0018553	0.0131348
AT2G18040_1	17.9392	9.1314	1.96457	8.48846e-07	1.83351e-05
AT2G18510_1	9.78457	5.37257	1.82121	3.54079e-05	0.000491163
AT2G18710_1	8.12395	5.10493	1.59139	0.000614677	0.00540793
AT2G19180_1	18.1883	7.91902	2.29679	0.00321707	0.0204256
AT2G19520_2	18.1963	10.372	1.75436	0.000494493	0.00446563
AT2G19680_1	14.9681	7.05761	2.12084	0.00147588	0.010985
AT2G20230_1	18.6072	12.3169	1.51071	0.00554735	0.0316855
AT2G20360_1	13.6671	6.43734	2.1231	6.63644e-09	2.18137e-07
AT2G20570_1	15.0173	4.90239	3.06326	3.56259e-08	1.01909e-06
AT2G20690_1	8.97417	4.69709	1.91058	0.000126899	0.0014727
AT2G20725_1	12.2571	7.53564	1.62655	0.00211102	0.014513
AT2G20760_1	6.03874	3.95601	1.52647	0.00700061	0.0380362
AT2G20860_1	19.2056	6.41947	2.99177	3.07083e-08	8.90457e-07
AT2G20890_1	3.39593	1.7319	1.96081	5.39204e-30	1.46332e-27
AT2G21140_1	4.60219	2.82644	1.62826	8.25648e-06	0.000139595
AT2G21160_1	6.56506	4.11639	1.59486	0.000771119	0.00652922
AT2G21170_1	15.0687	9.6261	1.5654	1.00785e-13	6.34948e-12
AT2G21190_1	14.3106	7.7352	1.85007	0.00840843	0.0439481
AT2G21250_1	9.27643	4.60689	2.0136	1.97764e-07	4.92502e-06
AT2G21330_1	2.32807	3.55024	0.65575	7.64351e-22	1.02404e-19
AT2G21370_1	3.26857	1.76161	1.85545	0.000562647	0.00501267
AT2G21580_1	9.00663	4.48631	2.00758	1.6166e-05	0.000250881
AT2G21600_1	10.1026	5.60464	1.80255	0.00144777	0.0108138
AT2G21960_1	14.0114	6.97663	2.00833	4.5052e-07	1.04339e-05
AT2G22230_1	6.10817	2.79769	2.18329	1.26472e-05	0.000202814
AT2G22500_1	6.21409	2.77799	2.2369	0.00542473	0.031221
AT2G23080_1	19.1289	7.81441	2.44789	3.31491e-07	7.77937e-06
AT2G23090_1	12.2133	5.25054	2.3261	2.99352e-15	2.20024e-13
AT2G23310_2	6.65203	2.81091	2.3665	0.00166302	0.0120393
AT2G23760_2	7.66143	4.83558	1.58439	0.00130797	0.0098862
AT2G23810_2	8.51303	2.42841	3.5056	0.000466596	0.00426096
AT2G23930_1	23.9384	14.5011	1.6508	0.000317252	0.0031352
AT2G24060_1	7.16268	4.39429	1.63	2.34893e-07	5.71519e-06
AT2G24090_1	2.03788	1.31327	1.55176	8.02726e-11	3.55483e-09
AT2G24270_1	19.8518	9.67954	2.0509	1.7444e-05	0.000267964
AT2G24290_1	15.2909	4.5239	3.38003	0.00462001	0.027348
AT2G24520_1	7.35639	3.0393	2.42042	0.00786344	0.0419067
AT2G24820_1	3.36684	1.92553	1.74852	0.000255579	0.00259851
AT2G24940_1	10.3177	5.69431	1.81193	8.4171e-10	3.17034e-08
AT2G25060_1	6.05633	2.38309	2.54138	0.00011696	0.00136936
AT2G25080_1	9.66418	6.11233	1.5811	0.000392988	0.00369067
AT2G25610_1	9.7205	6.0271	1.6128	0.00914604	0.0468546
AT2G25830_1	10.3281	6.78409	1.5224	0.00233579	0.0157666
AT2G25830_2	4.83809	2.81595	1.7181	0.00352631	0.0220258
AT2G25870_1	7.78876	4.37429	1.78058	0.000281898	0.00281473
AT2G25950_1	13.308	5.11415	2.60219	0.000824444	0.00688707
AT2G25970_2	3.09608	1.91819	1.61406	0.00791394	0.0421546
AT2G26110_1	5.32894	2.97361	1.79208	3.5609e-05	0.000491683
AT2G26340_2	8.38863	5.22114	1.60667	0.00412154	0.0249288
AT2G26540_1	10.2546	5.72084	1.79249	0.000922949	0.00750268
AT2G26540_2	4.17556	1.91765	2.17743	0.000558469	0.00497977
AT2G26670_1	4.7866	2.06001	2.32358	1.67161e-05	0.000257906
AT2G26680_2	6.08148	2.2422	2.71228	0.000935698	0.00758302
AT2G26770_1	19.4156	8.5189	2.27912	0.00364109	0.0225628
AT2G26900_1	8.9533	5.83026	1.53566	1.40089e-06	2.93024e-05
AT2G26920_3	34.8099	15.2608	2.28101	0.0069138	0.0376031
AT2G26980_1	15.6069	8.2624	1.8889	0.00139013	0.0104422
AT2G27350_1	12.5853	5.52244	2.27894	0.000457196	0.00420779
AT2G27530_1	6.9648	4.57886	1.52108	4.88726e-08	1.35766e-06
AT2G27600_1	7.38321	4.0558	1.82041	2.76898e-06	5.31886e-05
AT2G27680_1	10.7189	5.80838	1.84542	1.09774e-07	2.883e-06
AT2G28000_1	10.876	4.90052	2.21936	7.85489e-18	7.29264e-16
AT2G28520_1	15.0691	6.15845	2.4469	0.00400367	0.0244518
AT2G28605_1	3.15707	1.75118	1.80282	0.00687821	0.0374673
AT2G28790_1	6.18049	3.4026	1.8164	0.00715178	0.0387779
AT2G28840_2	7.19137	4.68091	1.53632	2.07037e-07	5.11982e-06
AT2G29210_1	6.53969	4.00294	1.63372	0.00158183	0.0116075
AT2G29360_1	4.96499	2.15716	2.30163	0.00017873	0.00194418
AT2G29390_1	9.36862	5.08586	1.84209	0.000215653	0.00225541
AT2G29530_1	18.3821	11.5457	1.59212	0.00905886	0.0464836
AT2G29650_1	13.5329	5.63962	2.39962	1.46198e-05	0.000230606
AT2G29690_2	13.2455	6.69428	1.97863	0.00519493	0.0301277
AT2G30200_1	6.59562	4.35042	1.51609	0.000238842	0.00245756
AT2G30200_2	5.13417	2.75356	1.86455	0.000319535	0.00315187
AT2G30390_1	13.0948	6.08425	2.15225	2.11046e-06	4.21454e-05
AT2G30390_2	4.30565	2.06243	2.08766	6.08009e-08	1.66284e-06
AT2G30970_1	26.2356	12.856	2.04074	6.51324e-07	1.46029e-05
AT2G30980_1	29.1887	13.6014	2.146	0.00673497	0.0368092
AT2G31060_1	13.2358	7.22759	1.83129	0.000849153	0.00707116
AT2G31400_1	9.44673	4.63473	2.03825	1.61754e-08	4.93372e-07
AT2G31400_2	6.06599	3.48662	1.73979	1.2556e-09	4.66292e-08
AT2G31440_1	18.6698	10.126	1.84376	0.00418446	0.0252355
AT2G31560_1	1.84496	3.98277	0.463235	3.21599e-09	1.13083e-07
AT2G31610_1	13.084	6.106	2.14281	6.73464e-23	1.01828e-20
AT2G31670_1	5.76229	2.88513	1.99723	6.52606e-07	1.46029e-05
AT2G31790_1	4.53553	2.81518	1.61109	0.000687834	0.00592836
AT2G31800_1	20.4732	10.598	1.93179	0.00199149	0.0138598
AT2G31810_1	15.4743	8.85922	1.74669	0.00447934	0.0266345
AT2G31955_1	18.8368	8.29223	2.27162	0.00482479	0.0282763
AT2G32080_1	4.50564	2.53233	1.77924	0.000286004	0.00284499
AT2G32160_1	6.41789	3.3425	1.92009	1.75068e-07	4.40123e-06
AT2G32480_2	5.04078	2.46916	2.0415	1.7687e-05	0.000270911
AT2G32500_1	9.02593	5.99767	1.50491	0.00778082	0.041592
AT2G32640_1	16.0009	8.68446	1.84247	0.00375777	0.0232179
AT2G32690_1	2.2808	4.87758	0.467609	3.12369e-62	3.00555e-59
AT2G32720_1	4.50291	2.40235	1.87438	0.00288346	0.0187116
AT2G32920_1	9.69675	6.24323	1.55316	0.00192887	0.0135469
AT2G32950_1	19.4636	7.34439	2.65013	0.000748722	0.00635993
AT2G33040_1	21.3511	8.73787	2.44351	1.82859e-26	3.87076e-24
AT2G33120_1	18.5232	6.98541	2.6517	3.30556e-05	0.000464005
AT2G33150_1	6.33946	3.53345	1.79413	7.95174e-12	3.8606e-10
AT2G33220_1	31.12	15.524	2.00463	0.00308376	0.0197331
AT2G33255_1	21.6864	9.55376	2.26994	0.000998221	0.00800392
AT2G33340_1	17.7337	10.8783	1.63019	0.00342529	0.0215428
AT2G33410_1	4.81732	2.2187	2.17123	0.00299683	0.0193052
AT2G33470_1	15.0673	7.80209	1.93119	0.00253687	0.0168445
AT2G33800_3	6.92763	3.68188	1.88155	5.30401e-25	9.35627e-23
AT2G34310_1	15.2411	8.18833	1.86132	0.00462288	0.0273497
AT2G34560_1	10.4035	3.96648	2.62285	1.25994e-05	0.000202355
AT2G34630_1	12.4212	6.45622	1.92392	0.00432196	0.0258294
AT2G34690_1	20.4981	9.31735	2.19999	0.00407968	0.0247716
AT2G34770_1	9.39945	3.9933	2.3538	0.000104801	0.00125619
AT2G34860_1	12.9478	8.22583	1.57404	8.14409e-06	0.000137915
AT2G35040_1	17.0497	9.59474	1.77698	5.38699e-05	0.000707393
AT2G35050_1	16.1937	9.43984	1.71546	0.00103912	0.00827547
AT2G35260_1	5.45523	3.62848	1.50345	0.00331455	0.0209619
AT2G35410_2	21.7046	12.8036	1.6952	0.00210655	0.0144981
AT2G35635_1	10.1755	3.83408	2.65397	3.50373e-08	1.0077e-06
AT2G35680_1	8.46338	4.99867	1.69312	0.00846112	0.0441363
AT2G35860_2	4.20194	1.98706	2.11466	1.064e-06	2.25679e-05
AT2G35960_1	3.14397	1.87406	1.67762	0.00157481	0.0115829
AT2G36000_1	6.71827	2.92236	2.29892	2.18587e-09	8.00527e-08
AT2G36060_1	13.6406	7.6758	1.77709	0.00257331	0.0170331
AT2G36120_1	3.54832	6.39711	0.554675	2.26199e-07	5.54797e-06
AT2G36250_1	10.9512	7.07839	1.54714	0.00140073	0.0104921
AT2G36390_1	11.0891	6.28377	1.76472	5.88539e-05	0.000761503
AT2G36570_1	5.81109	2.45944	2.36277	0.00392704	0.0241229
AT2G36620_1	2.18485	3.36908	0.648499	2.18096e-14	1.46097e-12
AT2G36950_1	6.043	12.3725	0.488422	0.000374687	0.00354396
AT2G37220_2	7.0541	3.51684	2.00581	4.20287e-58	3.70693e-55
AT2G37250_1	29.8315	12.662	2.35599	4.59048e-05	0.00061423
AT2G37270_1	12.0611	6.72255	1.79413	0.00010035	0.00120557
AT2G37400_3	4.03409	1.69427	2.38101	0.00644441	0.0355248
AT2G37500_1	15.8465	8.04146	1.9706	0.00119297	0.00921401
AT2G37540_1	9.32425	4.17264	2.23461	0.000256478	0.00260265
AT2G37550_1	35.1022	9.12151	3.84829	0.00106725	0.00844227
AT2G37975_1	19.2785	6.30133	3.05943	0.006079	0.0338857
AT2G38140_1	3.0064	1.96043	1.53354	6.03853e-12	2.98653e-10
AT2G38270_1	8.12722	5.30103	1.53314	0.0020236	0.0140536
AT2G38650_1	10.595	5.08488	2.08363	0.00101047	0.0080838
AT2G38700_1	14.6805	8.07071	1.81899	0.000283788	0.0028256
AT2G38710_1	17.56	8.06349	2.17771	0.00505618	0.0294198
AT2G39020_1	5.57901	3.38376	1.64876	0.00510682	0.0296655
AT2G39190_2	18.989	8.80349	2.15699	1.79364e-06	3.63676e-05
AT2G39900_1	16.2422	5.79463	2.80297	2.16994e-07	5.34108e-06
AT2G39930_3	17.1262	8.46362	2.0235	0.000159141	0.00176928
AT2G39990_1	24.6995	14.0183	1.76195	0.00853759	0.0444475
AT2G40060_2	9.35115	5.1625	1.81136	2.9357e-05	0.000420453
AT2G40300_1	11.162	4.19398	2.66144	7.51244e-05	0.000933585
AT2G40400_1	4.75271	2.16437	2.19588	0.00552544	0.031618
AT2G40600_1	13.681	7.55749	1.81026	0.000570408	0.00507327
AT2G40730_1	17.0628	8.75023	1.94998	0.00899032	0.0462135
AT2G40840_1	10.3444	3.53086	2.92971	1.83991e-18	1.90917e-16
AT2G41410_1	5.48399	3.09149	1.7739	5.14898e-05	0.000677821
AT2G41420_1	10.3524	4.90421	2.11092	2.26448e-07	5.54797e-06
AT2G41530_1	8.87771	4.54473	1.95341	7.22061e-05	0.000902278
AT2G41670_1	27.9831	15.0515	1.85916	0.00797589	0.0423567
AT2G41680_1	8.3346	5.53357	1.50619	3.03996e-05	0.000433499
AT2G41840_1	8.08164	4.98691	1.62057	1.34168e-11	6.31128e-10
AT2G42130_1	14.3826	6.65917	2.15982	4.53874e-06	8.22568e-05
AT2G42220_1	4.96773	2.48981	1.99522	1.06806e-17	9.74514e-16
AT2G42230_1	9.13911	3.75222	2.43566	5.86856e-05	0.000761186
AT2G42310_1	13.6204	6.22722	2.18724	9.67353e-06	0.000160226
AT2G42390_1	18.7627	8.74484	2.14558	0.00314343	0.0200543
AT2G42590_1	16.8451	9.55954	1.76212	6.51297e-11	2.9209e-09
AT2G42680_1	9.69465	6.32757	1.53213	0.0019245	0.0135404
AT2G42770_1	12.1648	7.22315	1.68414	0.0040325	0.0245852
AT2G42880_2	4.37921	2.6719	1.63899	3.16999e-05	0.000446753
AT2G43020_1	13.3191	5.70499	2.33465	0.00136873	0.0103034
AT2G43070_1	13.9307	7.47209	1.86436	2.41323e-05	0.000353763
AT2G43090_1	3.29389	2.06567	1.59459	1.77462e-06	3.61203e-05
AT2G43090_2	10.0526	4.53276	2.21777	6.2757e-07	1.41788e-05
AT2G43100_1	4.89076	3.16846	1.54358	5.90612e-09	1.95957e-07
AT2G43150_1	7.64942	3.50512	2.18236	2.99064e-20	3.55651e-18
AT2G43160_2	17.6885	9.8442	1.79685	4.58878e-05	0.00061423
AT2G43560_1	7.33943	4.88804	1.50151	1.93453e-05	0.000291668
AT2G43810_1	13.9351	5.23189	2.6635	1.75719e-05	0.000269537
AT2G43945_1	15.6337	6.6156	2.36315	9.40273e-05	0.00114521
AT2G43970_2	3.51913	1.86844	1.88346	1.02422e-26	2.21231e-24
AT2G44050_1	8.51257	5.54176	1.53608	0.00113451	0.00887592
AT2G44100_1	22.8872	12.378	1.84902	4.15282e-06	7.61759e-05
AT2G44525_1	21.5505	9.45656	2.27889	0.00540822	0.0311429
AT2G44610_1	20.8458	8.63018	2.41546	7.21952e-10	2.74861e-08
AT2G44620_1	12.3117	7.7103	1.59679	0.000996684	0.00799765
AT2G44750_1	22.173	7.64435	2.90057	0.0064111	0.0354149
AT2G45010_1	8.21382	3.89775	2.10732	0.0038332	0.0236288
AT2G45030_1	17.3605	7.10531	2.44332	0.00932522	0.0475653
AT2G45170_1	12.4219	2.63376	4.71641	0.00193286	0.0135659
AT2G45180_1	3.32744	1.89329	1.75749	1.20648e-40	5.55191e-38
AT2G45470_1	4.72877	2.74905	1.72014	4.12379e-25	7.52521e-23
AT2G45510_1	22.8227	10.0754	2.2652	0.0011975	0.00923787
AT2G45520_1	14.3658	7.4933	1.91715	0.00282933	0.0184394
AT2G45660_1	16.1075	7.64387	2.10724	1.49481e-05	0.000234386
AT2G45670_1	7.13602	4.38386	1.62779	0.00207937	0.0143469
AT2G45740_1	7.77553	4.18946	1.85597	1.33685e-08	4.12513e-07
AT2G45790_1	13.5472	7.09851	1.90846	0.00165502	0.0119896
AT2G46100_1	13.4008	7.21153	1.85825	0.00104415	0.00830922
AT2G46170_1	13.7138	6.48844	2.11357	0.000627597	0.0054942
AT2G46220_2	5.84916	2.8098	2.0817	3.10953e-05	0.00044117
AT2G46280_1	9.18753	5.34728	1.71817	0.000378542	0.00357403
AT2G46330_1	5.4484	1.68026	3.24259	5.07933e-05	0.000671156
AT2G46505_1	4.53544	2.67884	1.69306	0.000842798	0.00702376
AT2G46540_1	10.0959	6.1454	1.64284	0.000779648	0.00657947
AT2G47170_1	9.6653	5.01118	1.92875	3.93857e-17	3.38909e-15
AT2G47210_1	21.586	7.95339	2.71407	0.00018082	0.00196287
AT2G47450_1	2.90052	4.42866	0.654942	2.48308e-25	4.77835e-23
AT2G47510_1	8.01272	4.99516	1.6041	0.00180229	0.0128454
AT2G47580_1	19.0452	8.37164	2.27497	0.0029267	0.0189457
AT2G47690_1	10.1427	4.44275	2.28298	0.00220348	0.0150268
AT2G47730_1	2.51274	1.41858	1.7713	2.04117e-10	8.64149e-09
AT2G47850_1	6.36061	3.04392	2.08961	0.00340541	0.0214413
AT2G47940_1	10.851	6.4362	1.68593	6.69799e-06	0.000115459
AT2G48070_2	15.1855	8.30781	1.82786	0.000189646	0.00204818
AT2G48120_1	3.96537	6.32337	0.627098	0.00879078	0.0453862
AT3G01130_1	11.427	5.46535	2.09082	2.27046e-06	4.47496e-05
AT3G01200_1	14.1691	7.67134	1.84702	0.00849274	0.0442576
AT3G01370_2	19.722	10.2723	1.91992	0.00398594	0.0243716
AT3G01440_1	4.85716	2.84269	1.70865	0.00422835	0.0254133
AT3G01540_1	11.7812	7.34066	1.60492	1.11712e-05	0.000181902
AT3G01560_1	8.75444	3.88489	2.25346	0.00592981	0.0333836
AT3G01770_1	16.8028	5.91344	2.84145	0.00569622	0.0322918
AT3G01860_1	4.70121	2.00791	2.34135	0.00703044	0.038159
AT3G01910_1	14.2729	8.10495	1.76101	0.000208816	0.00220569
AT3G02090_1	12.3248	5.69449	2.16433	9.28011e-12	4.42436e-10
AT3G02300_1	9.9055	5.21347	1.89998	0.00926084	0.0472826
AT3G02540_1	10.5034	4.92263	2.13369	0.000213051	0.00223704
AT3G02580_1	2.16885	1.13228	1.91548	0.00872346	0.0451266
AT3G02640_1	5.39117	2.69918	1.99734	0.000461162	0.00422227
AT3G02720_1	13.2626	7.57633	1.75053	0.000882839	0.00725463
AT3G02900_1	16.8191	5.72074	2.94002	1.63886e-05	0.000253592
AT3G03070_1	17.6407	7.20435	2.44861	5.57529e-10	2.1615e-08
AT3G03890_1	10.632	5.98464	1.77654	0.00960005	0.0486988
AT3G03920_2	1.74532	2.82337	0.618168	0.00011377	0.00133793
AT3G03940_1	14.2	8.00587	1.7737	0.00870807	0.0450691
AT3G04090_1	8.70112	5.1803	1.67966	0.00113612	0.0088809
AT3G04240_1	22.1663	9.94349	2.22923	4.31884e-06	7.89474e-05
AT3G04400_1	8.81404	4.90262	1.79782	8.82762e-15	6.14681e-13
AT3G04550_1	4.56752	2.44844	1.86548	3.51388e-22	4.89354e-20
AT3G04560_1	11.652	2.97105	3.92185	7.06188e-10	2.6983e-08
AT3G04650_1	5.80124	2.73558	2.12066	0.000318509	0.00314468
AT3G04760_1	5.83905	3.06844	1.90293	0.000257945	0.00261253
AT3G04830_1	14.5666	7.84255	1.85738	0.00374245	0.0231503
AT3G04840_1	17.178	9.99291	1.71902	3.61857e-10	1.49605e-08
AT3G04870_1	14.7588	7.98279	1.84883	0.000646338	0.00563032
AT3G05000_1	11.5101	4.90262	2.34774	0.000709804	0.00609786
AT3G05060_1	21.0207	13.6834	1.53622	2.71734e-05	0.000391831
AT3G05160_1	11.2444	5.34322	2.10442	0.00295236	0.0190979
AT3G05350_1	10.588	6.21113	1.70468	0.00431732	0.0258294
AT3G05410_1	18.2777	8.90225	2.05316	0.00480964	0.0282336
AT3G05560_1	7.8038	3.84716	2.02846	1.15702e-06	2.44211e-05
AT3G05625_1	6.89738	3.31463	2.08089	0.00159157	0.0116572
AT3G05680_1	3.53427	1.52144	2.32298	0.00860981	0.0447355
AT3G05840_1	10.1845	5.00123	2.0364	0.000308838	0.00305775
AT3G06035_1	3.14463	2.08159	1.51068	0.00310738	0.0198362
AT3G06050_1	7.62696	4.73569	1.61053	0.0074872	0.0402053
AT3G06070_1	2.83448	1.72085	1.64714	0.00794194	0.0422612
AT3G06130_2	1.95038	3.79857	0.513452	0.00411514	0.0249288
AT3G06170_1	18.9011	10.0656	1.87779	0.00618803	0.0343583
AT3G06310_1	16.4268	9.70083	1.69334	0.00128162	0.00970982
AT3G06320_1	12.0073	4.76362	2.52062	0.000788003	0.00663488
AT3G06483_1	18.1415	7.4018	2.45096	6.6078e-11	2.95093e-09
AT3G06550_2	3.83737	1.46799	2.61402	1.45759e-07	3.76271e-06
AT3G06580_1	10.0486	5.45206	1.84308	0.0024118	0.0162176
AT3G06610_1	13.2781	7.6552	1.73452	0.00201716	0.0140182
AT3G06860_1	9.72	4.29348	2.2639	0.00570691	0.0322988
AT3G06930_1	7.64006	3.68924	2.07091	1.83382e-05	0.000279671
AT3G07160_1	19.3057	10.2736	1.87915	0.00175531	0.0125551
AT3G07170_1	29.3596	12.8407	2.28644	0.00475513	0.0279602
AT3G07430_1	3.95696	2.52087	1.56968	9.31138e-06	0.000154955
AT3G07480_1	9.69891	5.84295	1.65993	3.497e-05	0.000486364
AT3G07640_1	10.8346	5.79652	1.86915	0.0083019	0.0435202
AT3G07680_1	11.768	6.45433	1.82326	9.73024e-05	0.00117563
AT3G07950_1	11.2813	6.26938	1.79943	0.00960264	0.0486988
AT3G08510_1	11.5404	7.13568	1.61728	1.85935e-07	4.65232e-06
AT3G08530_1	15.8771	7.37373	2.1532	0.000202182	0.00215498
AT3G08580_1	10.2571	5.77004	1.77765	1.94072e-23	3.16009e-21
AT3G08610_1	18.9657	9.04823	2.09606	1.93683e-15	1.44362e-13
AT3G08680_2	4.08008	1.89881	2.14876	0.000817831	0.00684804
AT3G08690_1	19.1561	8.26014	2.3191	4.20335e-05	0.000568904
AT3G09200_1	13.9632	8.07827	1.72849	1.34875e-13	8.34803e-12
AT3G09410_1	13.5991	6.10085	2.22906	9.8904e-05	0.00119361
AT3G09740_1	22.559	9.53712	2.36539	3.62289e-11	1.65994e-09
AT3G09810_1	20.9254	9.41928	2.22155	0.000248293	0.00253417
AT3G09860_1	17.6531	8.40827	2.0995	8.96983e-07	1.91405e-05
AT3G09900_1	12.6578	6.16157	2.05432	0.00406259	0.0247117
AT3G10060_1	10.7218	5.08197	2.10976	7.42294e-09	2.41737e-07
AT3G10070_1	17.9412	8.89255	2.01755	0.000205793	0.00218906
AT3G10130_2	12.6172	6.02117	2.09547	0.000664138	0.00575459
AT3G10220_1	13.8765	5.94602	2.33374	0.000201524	0.0021523
AT3G10230_1	11.9854	5.20944	2.3007	4.41376e-05	0.000595098
AT3G10270_1	12.1981	5.50669	2.21515	0.000276755	0.00277647
AT3G10330_1	13.6571	3.85127	3.54614	0.00659487	0.0361659
AT3G10350_1	14.6702	8.42065	1.74216	0.000912916	0.00743893
AT3G10360_1	7.18244	3.29753	2.17813	0.00798934	0.0424068
AT3G10405_3	6.81683	3.02266	2.25524	0.00282475	0.0184242
AT3G10520_1	6.9946	3.59345	1.94649	0.000259294	0.00262294
AT3G10670_1	8.89778	5.55233	1.60253	0.00867913	0.044949
AT3G10670_2	5.12451	2.89958	1.76733	0.00218579	0.0149351
AT3G10720_2	5.43823	2.99209	1.81753	0.00184327	0.0130648
AT3G10850_1	7.69082	4.1363	1.85935	1.89972e-18	1.9521e-16
AT3G10970_1	13.0654	6.78967	1.9243	4.49208e-05	0.000604118
AT3G11230_1	20.3432	7.23526	2.81167	0.00120006	0.00925085
AT3G11500_1	12.421	6.71211	1.85053	0.00520967	0.0301636
AT3G11630_1	2.0035	1.26117	1.58861	6.64606e-22	9.01819e-20
AT3G11630_2	7.78999	4.80902	1.61987	8.34459e-23	1.22665e-20
AT3G11660_1	5.56298	3.04149	1.82903	2.39668e-07	5.80757e-06
AT3G11780_1	15.8453	7.21154	2.19721	0.000162479	0.00180259
AT3G11800_1	11.7962	5.68768	2.07399	0.00285961	0.0185909
AT3G11910_1	11.7069	7.59657	1.54108	0.00333268	0.021046
AT3G12080_2	7.59822	4.93478	1.53973	0.00062173	0.00545637
AT3G12140_1	13.4192	6.41741	2.09106	0.0022608	0.0153682
AT3G12260_1	13.5543	7.81151	1.73517	1.14463e-05	0.000185525
AT3G12290_1	11.6387	4.17326	2.78888	4.07806e-09	1.41515e-07
AT3G12760_1	13.4794	5.51207	2.44544	0.000661154	0.00573578
AT3G12780_2	3.23659	2.08584	1.5517	4.55043e-28	1.14671e-25
AT3G12800_1	14.172	9.31788	1.52094	0.00147869	0.0109982
AT3G13110_1	5.12451	2.61137	1.96238	0.000853541	0.0070854
AT3G13180_1	14.2942	7.72454	1.8505	0.0033922	0.0213836
AT3G13410_1	17.9819	8.3557	2.15206	2.00807e-14	1.35372e-12
AT3G13460_1	6.3137	4.15919	1.51801	0.00215725	0.0147591
AT3G13490_2	3.51674	1.23452	2.84867	0.000159615	0.00177268
AT3G13530_1	10.1042	4.18201	2.4161	0.00344388	0.021632
AT3G13570_1	8.27063	5.03047	1.64411	0.000721971	0.00617233
AT3G13670_2	10.9629	7.2737	1.50719	0.00245403	0.0164077
AT3G13740_2	8.48373	3.99188	2.12525	0.00609064	0.0338857
AT3G13772_1	11.1282	5.20024	2.13994	0.00823755	0.0432745
AT3G13870_1	12.1111	6.40953	1.88955	1.15829e-06	2.44211e-05
AT3G13920_1	8.86484	4.46257	1.98649	2.0357e-18	2.05198e-16
AT3G13930_1	19.8062	9.8615	2.00844	2.31596e-06	4.53089e-05
AT3G14010_1	13.1573	3.45621	3.80686	2.39787e-07	5.80757e-06
AT3G14067_1	5.31955	3.13184	1.69854	5.77631e-07	1.31476e-05
AT3G14150_1	8.4757	4.30271	1.96985	0.000661018	0.00573578
AT3G14240_1	6.75179	2.8582	2.36226	7.93823e-08	2.12704e-06
AT3G14415_1	4.74661	3.14765	1.50799	4.47815e-26	9.29348e-24
AT3G14600_1	11.9535	5.44361	2.19588	1.57616e-07	4.01978e-06
AT3G14660_1	7.43106	3.33836	2.22596	0.000147967	0.00167138
AT3G15160_1	15.0087	7.50842	1.99892	0.00867991	0.044949
AT3G15190_1	11.6943	7.65136	1.5284	4.71183e-06	8.51024e-05
AT3G15410_1	10.7284	6.29735	1.70364	0.00793768	0.0422598
AT3G15520_1	13.3465	8.26176	1.61545	0.00105551	0.00838668
AT3G15580_1	11.6049	6.31121	1.83877	0.000338817	0.00328693
AT3G15640_2	22.4046	10.3394	2.16693	5.26959e-06	9.32664e-05
AT3G15710_1	12.4536	5.88702	2.11544	0.00232821	0.0157255
AT3G15730_1	11.5339	6.86669	1.67968	6.28387e-07	1.41788e-05
AT3G16080_1	5.17073	3.18901	1.62142	0.000277021	0.00277651
AT3G16110_1	18.8273	8.13847	2.31337	0.00149408	0.0110795
AT3G16140_1	9.86591	3.7453	2.63421	9.26693e-81	1.63469e-77
AT3G16270_1	7.38513	3.51575	2.10058	0.00113909	0.0088975
AT3G16520_2	4.60999	2.94015	1.56795	0.00643213	0.0354941
AT3G16565_1	14.355	3.47498	4.13094	0.00212225	0.0145667
AT3G16640_1	7.42001	3.49146	2.12519	6.59807e-48	4.10788e-45
AT3G16670_1	3.46725	2.10301	1.64871	6.35642e-05	0.000812637
AT3G16850_1	12.2786	7.80557	1.57306	0.00303805	0.0195114
AT3G17210_1	5.06627	2.46128	2.05839	2.70016e-09	9.72056e-08
AT3G17240_1	12.6808	8.31173	1.52565	0.00157378	0.0115829
AT3G17410_1	15.7422	7.48346	2.1036	0.000216633	0.00226119
AT3G17440_1	11.9504	6.21282	1.92351	0.00248366	0.0165536
AT3G17640_1	4.5095	2.81035	1.6046	0.00291346	0.0188734
AT3G17650_2	11.54	5.34418	2.15935	0.00620019	0.0343935
AT3G18035_2	5.36537	2.47265	2.16989	3.38914e-05	0.000473228
AT3G18060_1	12.4048	7.30209	1.6988	0.00303621	0.0195114
AT3G18190_1	7.40025	2.90597	2.54656	9.96785e-05	0.00120022
AT3G18410_2	19.5757	8.67477	2.25662	8.32649e-08	2.22544e-06
AT3G18490_1	7.75009	3.16196	2.45104	1.19381e-20	1.43583e-18
AT3G18500_2	15.3831	7.90265	1.94657	0.000151983	0.00170581
AT3G18680_2	6.55451	3.63975	1.80081	0.000366796	0.00348803
AT3G18890_1	5.17009	3.15011	1.64124	3.7605e-11	1.71557e-09
AT3G19100_2	11.4148	6.25455	1.82504	0.00538656	0.031035
AT3G19170_1	9.76366	6.24886	1.56247	3.50074e-07	8.19731e-06
AT3G19170_2	2.60357	1.60601	1.62114	0.000458287	0.00421417
AT3G19490_1	14.6472	8.67307	1.68881	0.00250511	0.016686
AT3G20060_1	4.88125	3.23847	1.50727	0.00489656	0.0285853
AT3G20290_1	17.1467	10.2007	1.68093	0.00651025	0.0357945
AT3G20390_1	7.91542	4.67494	1.69316	1.67873e-13	1.02113e-11
AT3G20470_1	2.1704	5.33453	0.406859	1.0753e-10	4.72241e-09
AT3G20500_1	10.6099	4.47286	2.37207	0.00423246	0.0254236
AT3G20510_1	13.2009	7.15346	1.84538	0.00308039	0.0197331
AT3G20680_1	6.67289	3.13883	2.12592	9.0338e-06	0.000151527
AT3G20810_1	6.0574	3.18839	1.89983	0.000206229	0.0021915
AT3G20810_2	7.7327	4.87595	1.58589	0.00500495	0.0291377
AT3G20970_1	7.54031	4.2789	1.76221	0.00745134	0.0400541
AT3G21055_1	3.30496	2.19021	1.50897	1.08561e-35	4.10361e-33
AT3G21215_2	15.0444	4.87373	3.08684	5.12667e-06	9.11944e-05
AT3G21690_1	3.77656	1.91329	1.97386	0.00354535	0.022125
AT3G21865_1	20.1895	10.0226	2.01439	0.000870192	0.00717857
AT3G22110_1	7.70893	4.28939	1.79721	0.000329075	0.00321865
AT3G22120_1	9.73842	5.99066	1.6256	1.27257e-47	7.48269e-45
AT3G22190_1	18.2902	6.64465	2.75261	0.00181179	0.0128871
AT3G22440_1	6.56205	3.65903	1.79338	3.00936e-14	1.99069e-12
AT3G22845_1	10.1912	5.53775	1.84031	0.000455051	0.00419535
AT3G23080_1	16.9155	7.4934	2.25739	0.000237944	0.00245219
AT3G23310_2	6.90662	4.01045	1.72216	0.00149645	0.0110836
AT3G23400_1	6.86515	3.80566	1.80393	4.14669e-08	1.17036e-06
AT3G23400_2	4.76456	2.66579	1.7873	4.0515e-08	1.14655e-06
AT3G23450_1	5.19532	8.09056	0.642145	1.20083e-33	4.09985e-31
AT3G23530_2	16.9811	9.00617	1.8855	0.00226919	0.0154153
AT3G23600_1	13.3852	8.27916	1.61674	1.41911e-05	0.000224177
AT3G23700_1	16.8601	7.30991	2.30647	9.28084e-19	1.00233e-16
AT3G23700_2	6.20377	3.11648	1.99064	6.71112e-10	2.58293e-08
AT3G23940_1	8.13984	4.86177	1.67426	0.00266267	0.0175259
AT3G23940_2	9.3315	5.66802	1.64634	2.54674e-08	7.50828e-07
AT3G24160_1	15.5773	9.47118	1.64471	2.31935e-08	6.89551e-07
AT3G24180_1	16.2938	8.11446	2.008	0.00608607	0.0338857
AT3G24550_1	9.50028	5.02299	1.89136	0.00123967	0.00946714
AT3G24760_1	10.3611	3.86276	2.6823	6.26207e-05	0.000804342
AT3G25040_1	21.6351	9.62474	2.24787	5.32961e-06	9.41712e-05
AT3G25220_1	17.1215	8.54884	2.00279	0.000108762	0.00129318
AT3G25410_2	6.29614	2.88287	2.18399	0.00211168	0.014513
AT3G25470_1	16.4777	10.0685	1.63655	0.00399268	0.0243987
AT3G25480_1	9.29692	4.71492	1.97181	0.000684696	0.00590613
AT3G25480_2	11.0511	3.40227	3.24816	5.49223e-10	2.15256e-08
AT3G25530_1	12.143	7.45494	1.62885	1.2703e-05	0.000203402
AT3G25660_2	3.58184	2.04607	1.7506	9.25076e-06	0.000154189
AT3G25760_1	4.42169	2.04749	2.15957	0.00263256	0.0173602
AT3G25770_1	2.73547	1.66319	1.64471	2.42569e-18	2.3994e-16
AT3G25840_1	10.6586	4.36971	2.43921	0.00737288	0.0397527
AT3G25860_1	6.00171	2.86771	2.09286	8.66056e-06	0.000145729
AT3G26060_1	4.73446	2.55194	1.85524	3.37075e-35	1.23021e-32
AT3G26060_2	11.6094	7.02482	1.65262	2.45335e-12	1.27286e-10
AT3G26740_1	5.00072	2.76169	1.81074	2.60732e-80	3.44948e-77
AT3G26744_1	8.56408	2.47246	3.4638	0.00398324	0.0243691
AT3G26980_1	5.8747	3.26767	1.79783	0.00717112	0.038843
AT3G27090_1	15.934	9.50507	1.67637	1.16603e-05	0.000188416
AT3G27110_1	8.92053	4.96678	1.79604	0.000222657	0.00231493
AT3G27240_1	9.40693	5.44422	1.72787	0.00245206	0.0164077
AT3G27380_1	12.0801	7.05919	1.71126	0.000329081	0.00321865
AT3G27570_1	19.8053	9.33672	2.12123	0.000941075	0.00762076
AT3G27740_1	14.1684	7.18258	1.97261	4.43565e-08	1.2387e-06
AT3G27750_1	14.4943	6.10868	2.37274	1.84206e-05	0.00028034
AT3G27770_1	15.5319	6.34187	2.4491	1.28359e-05	0.000205165
AT3G27830_2	3.26321	1.99155	1.63853	7.19437e-09	2.35016e-07
AT3G27850_1	4.23888	2.74572	1.54381	5.72206e-27	1.31657e-24
AT3G27890_1	13.7681	6.96138	1.97778	0.000458948	0.00421446
AT3G27925_2	3.83124	2.1674	1.76767	4.00863e-06	7.39152e-05
AT3G28040_1	4.83943	2.50636	1.93086	1.28519e-05	0.000205165
AT3G28040_2	3.86417	1.9505	1.98112	0.00173266	0.0124512
AT3G28200_1	6.48848	3.81589	1.70039	0.0041941	0.0252664
AT3G28710_1	16.46	7.93826	2.0735	2.13833e-08	6.42958e-07
AT3G28715_1	14.9633	8.52158	1.75593	0.000484502	0.00439039
AT3G28720_1	9.54535	4.19398	2.27596	0.000357687	0.00341367
AT3G28900_1	12.8715	5.64503	2.28015	1.37126e-09	5.07463e-08
AT3G28920_1	4.31198	2.4809	1.73807	0.000233158	0.00241226
AT3G28950_1	16.8775	4.15781	4.05922	1.46256e-06	3.03523e-05
AT3G29075_1	17.7308	9.45742	1.8748	4.17788e-06	7.65029e-05
AT3G29320_1	16.1359	5.19582	3.10555	5.04412e-28	1.24156e-25
AT3G42050_1	27.3496	13.3756	2.04473	3.45068e-17	3.06907e-15
AT3G42170_2	14.9423	4.08197	3.66055	0.000460315	0.00422182
AT3G42790_1	6.5552	4.17038	1.57185	0.00453974	0.0269331
AT3G44010_1	5.39706	1.61409	3.34372	8.26442e-19	9.01759e-17
AT3G44020_1	4.4753	2.09461	2.13658	0.00419436	0.0252664
AT3G44100_1	6.42772	4.23733	1.51693	0.001253	0.00954772
AT3G44340_1	20.9426	5.5716	3.75882	1.68263e-06	3.45806e-05
AT3G44750_1	7.99774	4.10839	1.94669	0.000625887	0.00548376
AT3G45300_1	14.1334	4.13482	3.41814	0.00185849	0.0131486
AT3G46010_1	8.56006	4.97732	1.71981	5.61023e-06	9.85461e-05
AT3G46430_1	9.00907	4.13144	2.18062	3.70359e-09	1.29797e-07
AT3G46550_2	6.49932	4.30338	1.51028	0.00561716	0.0319979
AT3G46630_1	13.6303	6.62837	2.05635	0.000117302	0.00137185
AT3G47670_1	5.76194	2.48678	2.31703	0.000426271	0.00394031
AT3G47810_1	8.12309	2.96394	2.74064	8.52686e-07	1.83469e-05
AT3G48140_1	11.7581	6.29163	1.86885	2.08109e-21	2.71929e-19
AT3G48170_1	19.3678	10.0258	1.9318	0.00175292	0.0125527
AT3G48420_1	6.2446	3.59744	1.73585	7.3746e-07	1.61652e-05
AT3G48560_2	8.1796	4.8228	1.69602	7.04701e-13	3.98853e-11
AT3G48930_1	10.3437	6.47489	1.5975	1.54327e-05	0.00024127
AT3G48990_1	3.28902	1.97858	1.66231	0.000469619	0.00428395
AT3G49080_1	16.0462	5.88793	2.72528	0.000211812	0.00222623
AT3G49870_1	7.26514	3.21848	2.25732	5.15641e-05	0.000677956
AT3G50370_1	11.8234	5.00445	2.36258	0.000166702	0.00183407
AT3G50370_2	4.50575	2.21756	2.03185	0.00071163	0.00610859
AT3G50550_1	3.54546	7.23242	0.490218	0.000116947	0.00136936
AT3G50790_1	16.199	8.04091	2.01458	0.00806532	0.0426425
AT3G50830_1	9.28531	3.81692	2.43267	2.32522e-06	4.54062e-05
AT3G51050_1	11.0013	5.40429	2.03566	0.00785096	0.0418613
AT3G51130_1	11.3037	5.35695	2.1101	0.00241698	0.0162409
AT3G51140_1	13.4807	8.69068	1.55117	0.00194235	0.0136235
AT3G51370_2	11.8203	5.48248	2.15601	3.72728e-06	6.98221e-05
AT3G51510_1	8.77141	4.14762	2.11481	5.35526e-09	1.8051e-07
AT3G51730_1	14.9023	7.71619	1.9313	0.000207349	0.00220099
AT3G51820_1	12.1885	6.69717	1.81995	2.04392e-13	1.22914e-11
AT3G51830_1	19.8919	8.50019	2.34017	0.00432197	0.0258294
AT3G51840_1	16.5974	8.96876	1.85058	0.000262028	0.00264124
AT3G51870_1	16.1162	7.38654	2.18183	9.07833e-06	0.000152033
AT3G51950_1	9.8494	4.74677	2.07497	2.71467e-11	1.26018e-09
AT3G52040_1	8.56032	4.02336	2.12766	0.000342459	0.00331618
AT3G52060_1	5.75163	3.20378	1.79526	3.34063e-05	0.000468307
AT3G52090_1	12.854	5.78858	2.22058	3.58207e-06	6.74602e-05
AT3G52150_1	6.12358	3.84335	1.59329	0.00262823	0.0173424
AT3G52200_1	20.2772	9.09912	2.22848	0.00413093	0.0249553
AT3G52230_1	3.18205	2.04554	1.55561	6.53813e-06	0.000113256
AT3G52300_1	18.2253	12.0667	1.51038	1.1929e-05	0.000192171
AT3G52370_1	5.55394	2.16672	2.56329	0.000186917	0.00202283
AT3G52380_2	5.75239	3.788	1.51858	5.57336e-05	0.000726459
AT3G52390_1	15.7504	7.25766	2.17017	7.05071e-05	0.000883133
AT3G52470_1	4.81482	2.78365	1.72968	0.00360186	0.0223721
AT3G52500_1	5.94534	3.74882	1.58592	2.02132e-06	4.05183e-05
AT3G52640_1	13.4313	5.20231	2.5818	0.000461933	0.00422567
AT3G52750_1	13.0549	6.71696	1.94358	0.00268108	0.0176034
AT3G52860_1	15.8776	6.68174	2.37627	0.00396102	0.0242612
AT3G52960_1	7.2836	4.54186	1.60366	2.08517e-12	1.09798e-10
AT3G52990_1	11.9203	6.77186	1.76027	4.53847e-06	8.22568e-05
AT3G53180_1	18.4381	7.91395	2.32982	0.000213985	0.0022427
AT3G53430_1	6.22754	3.66456	1.6994	4.30429e-05	0.000581821
AT3G53460_1	3.93362	1.54598	2.54442	8.79986e-93	3.10459e-89
AT3G53460_2	5.52167	2.83103	1.95041	1.18857e-41	5.71808e-39
AT3G53500_1	24.1453	15.0397	1.60543	0.00814	0.0429266
AT3G53560_2	3.91012	2.2805	1.71459	0.000110167	0.0013028
AT3G53580_1	21.0863	11.4509	1.84145	1.58794e-05	0.000247284
AT3G53740_1	6.25643	3.80795	1.64299	2.51244e-23	4.02904e-21
AT3G53800_1	10.7432	4.22059	2.54543	0.00207077	0.0142968
AT3G53870_1	15.2156	8.62132	1.76488	2.57864e-09	9.3148e-08
AT3G54050_1	6.78088	3.25259	2.08476	3.06094e-25	5.78518e-23
AT3G54080_3	11.9309	4.45465	2.67831	0.000729149	0.00620909
AT3G54470_1	11.6106	7.30827	1.5887	0.00430331	0.025776
AT3G54640_2	4.32755	2.58307	1.67535	0.00278081	0.0181792
AT3G54660_2	4.81194	2.71448	1.77269	6.35064e-05	0.000812637
AT3G54690_1	4.61455	2.25148	2.04956	0.00206698	0.0142893
AT3G54910_1	7.30562	3.32106	2.19979	5.09896e-06	9.08542e-05
AT3G54920_1	4.79795	3.05481	1.57062	0.000178014	0.00194038
AT3G54920_2	4.01759	2.20329	1.82345	0.00296557	0.0191504
AT3G55010_1	3.9105	1.90647	2.05117	0.000661137	0.00573578
AT3G55030_1	16.9586	8.43265	2.01107	0.000420003	0.00388576
AT3G55040_1	8.13965	5.20453	1.56395	0.00593469	0.0333933
AT3G55170_1	6.93077	2.38334	2.90801	7.46261e-06	0.000128221
AT3G55260_1	15.6426	8.36194	1.87069	0.00570598	0.0322988
AT3G55330_1	7.93262	5.16282	1.53649	0.000320178	0.00315527
AT3G55340_1	14.2252	7.27204	1.95615	0.00324196	0.0205466
AT3G55460_1	19.4474	10.9343	1.77858	0.00020175	0.00215255
AT3G55530_1	29.3785	16.8903	1.73937	0.00343049	0.0215607
AT3G55610_1	5.41013	2.74853	1.96837	0.000333758	0.00325355
AT3G55750_1	11.9326	4.65723	2.56216	1.93034e-12	1.02667e-10
AT3G55770_1	8.04391	4.74145	1.69651	6.6179e-05	0.000840862
AT3G55960_1	10.8689	4.3448	2.50159	0.00867227	0.044949
AT3G56040_1	8.51603	4.18912	2.03289	0.000551398	0.00492489
AT3G56040_3	5.24337	2.48	2.11426	0.00401236	0.0244907
AT3G56090_1	12.5561	5.32661	2.35724	1.66963e-07	4.21752e-06
AT3G56190_1	19.5015	12.29	1.58677	0.000419504	0.00388454
AT3G56210_2	26.8966	6.64003	4.05067	2.01692e-05	0.00030244
AT3G56310_1	16.1749	8.13788	1.9876	0.00142058	0.0106257
AT3G56490_2	15.0353	7.57122	1.98585	0.00164848	0.0119504
AT3G56590_1	7.52031	4.26052	1.76512	0.000261912	0.00264124
AT3G56680_1	10.8585	5.55226	1.95568	0.000864772	0.00714508
AT3G56900_1	5.87361	2.53678	2.31538	5.06292e-16	3.94015e-14
AT3G57090_1	7.41377	3.99782	1.85445	0.00470565	0.0277308
AT3G57220_1	21.8158	8.07359	2.70212	0.00266524	0.017532
AT3G57230_1	25.2508	11.4825	2.19906	0.00215158	0.0147298
AT3G57290_1	15.9673	8.13773	1.96213	1.54078e-05	0.000241237
AT3G57560_2	4.14503	2.10991	1.96455	0.000255107	0.0025962
AT3G57610_1	13.8546	8.50469	1.62905	0.00230369	0.0155908
AT3G57650_1	17.4223	5.41481	3.21753	2.6616e-05	0.000385896
AT3G57785_1	10.6932	5.54038	1.93005	7.20921e-05	0.000901918
AT3G57870_1	7.68217	4.76137	1.61344	0.000724648	0.00619022
AT3G58120_2	4.66729	2.89454	1.61245	0.0030364	0.0195114
AT3G58130_1	23.1556	13.978	1.65658	0.00412182	0.0249288
AT3G58500_1	16.5729	7.63283	2.17127	2.99722e-07	7.11268e-06
AT3G58560_1	8.18873	4.11508	1.98993	0.00440911	0.0262611
AT3G58610_2	7.87454	4.9345	1.59581	8.4789e-12	4.09775e-10
AT3G58990_1	4.58948	2.48443	1.8473	1.63583e-07	4.15194e-06
AT3G59300_1	13.1086	8.43324	1.5544	0.00177233	0.0126574
AT3G59350_2	18.6064	5.75201	3.23477	0.00285257	0.0185566
AT3G59410_1	5.89117	3.42348	1.72082	6.19655e-07	1.40739e-05
AT3G59810_1	11.9801	4.735	2.53011	0.000207538	0.00220099
AT3G59820_3	2.55469	4.86152	0.525493	0.00309209	0.0197744
AT3G59870_1	9.87739	3.61829	2.72985	0.000850937	0.00708044
AT3G59920_1	43.3209	21.5748	2.00794	0.00410207	0.0248804
AT3G60370_1	18.4859	7.87443	2.34759	5.15318e-06	9.14134e-05
AT3G60600_1	7.61606	4.07909	1.8671	0.00115679	0.00900137
AT3G60630_1	4.56631	2.01863	2.26209	0.000853512	0.0070854
AT3G60770_1	13.4315	6.66939	2.0139	2.62302e-18	2.54698e-16
AT3G60810_1	34.4873	16.7134	2.06345	6.84155e-05	0.000863062
AT3G60820_1	23.9729	13.5736	1.76614	0.000203085	0.00216243
AT3G61070_2	6.6288	3.49843	1.8948	0.00162245	0.011794
AT3G61080_1	20.4991	9.14467	2.24164	0.00198103	0.0138306
AT3G61770_1	5.25728	1.98482	2.64874	0.000196393	0.00210814
AT3G61870_1	4.33909	2.54402	1.7056	3.93134e-17	3.38909e-15
AT3G62030_1	14.0923	7.76189	1.81558	1.6272e-55	1.23016e-52
AT3G62190_1	17.854	7.37486	2.42093	0.00765875	0.0410224
AT3G62290_1	8.79149	4.60522	1.90903	4.94204e-09	1.68731e-07
AT3G62530_1	15.2962	7.36408	2.07714	4.75979e-12	2.3763e-10
AT3G62560_1	10.6601	5.2244	2.04044	0.00358568	0.0222978
AT3G62580_1	10.1442	5.65022	1.79536	0.00340276	0.0214374
AT3G62700_3	5.35988	2.85681	1.87618	0.004889	0.0285569
AT3G62790_1	16.4346	6.96023	2.36122	8.43998e-07	1.82676e-05
AT3G62840_1	6.79061	2.92305	2.32313	5.65387e-09	1.89369e-07
AT3G62980_1	12.3058	6.49105	1.89582	0.00149338	0.0110795
AT3G63130_1	7.07112	4.42781	1.59698	5.13144e-10	2.05724e-08
AT3G63400_2	9.9759	5.61881	1.77545	0.000236647	0.00244121
AT3G63410_1	5.85004	3.64403	1.60538	2.82997e-11	1.30797e-09
AT3G63420_1	11.8336	6.65615	1.77785	0.00868063	0.044949
AT3G63460_1	8.3686	5.2079	1.6069	0.00154903	0.0114171
AT3G63460_2	4.75466	2.36855	2.00741	7.47195e-09	2.41844e-07
AT3G63520_1	17.4321	8.57309	2.03335	9.32317e-11	4.11152e-09
AT3G63540_2	1.7929	3.53575	0.507077	9.50948e-14	6.02684e-12
AT4G00330_1	6.08035	3.05416	1.99084	0.000189988	0.00204978
AT4G00370_1	13.8368	8.8455	1.56428	0.00152915	0.0113099
AT4G00400_2	2.41229	1.33787	1.80309	0.00845722	0.0441363
AT4G00570_1	11.4691	5.56871	2.05956	3.44387e-05	0.000480237
AT4G00585_1	13.1923	4.91515	2.68401	5.83734e-11	2.64027e-09
AT4G00810_1	7.78875	4.96932	1.56737	0.000329346	0.00321865
AT4G00860_1	10.5357	5.11912	2.05811	1.22552e-16	1.02944e-14
AT4G00895_1	6.92802	3.45435	2.00559	5.65204e-13	3.2162e-11
AT4G01050_1	9.04373	5.94144	1.52214	1.71749e-31	5.34644e-29
AT4G01070_2	2.5096	1.4422	1.74012	0.00492098	0.0286986
AT4G01100_1	20.7858	7.83572	2.6527	2.80536e-06	5.36924e-05
AT4G01150_1	4.24986	2.11164	2.01259	4.13761e-49	2.73703e-46
AT4G01560_1	19.232	6.19549	3.1042	0.00663158	0.0363295
AT4G01690_1	12.3477	5.55961	2.22096	1.14688e-10	5.01592e-09
AT4G01900_1	6.644	3.26199	2.03679	7.1965e-11	3.20033e-09
AT4G02080_1	17.2692	8.11119	2.12906	0.000165714	0.001827
AT4G02210_1	7.11995	3.10768	2.29108	0.00571966	0.0323381
AT4G02260_2	18.5896	7.68438	2.41915	9.65837e-05	0.00116961
AT4G02420_1	5.71609	2.79321	2.04642	0.0059519	0.0334545
AT4G02510_4	4.59558	2.24557	2.04651	1.16196e-05	0.000188046
AT4G02570_1	16.8485	8.05938	2.09055	1.30969e-05	0.000208135
AT4G02580_1	17.2896	10.2879	1.68057	4.42772e-05	0.000596221
AT4G02610_1	24.9474	10.3799	2.40344	0.000471719	0.00429662
AT4G02620_1	8.78333	3.99269	2.19985	9.33571e-13	5.17326e-11
AT4G02790_1	17.9724	7.59912	2.36506	5.00423e-06	8.97276e-05
AT4G03080_1	9.54434	4.74634	2.01088	0.00319796	0.0203654
AT4G03520_1	8.08922	4.45929	1.81401	1.17834e-30	3.37069e-28
AT4G04210_1	8.75598	4.88859	1.79111	0.00417818	0.025212
AT4G04320_1	16.2545	5.62431	2.89005	2.57618e-13	1.53181e-11
AT4G04330_1	15.2931	5.29109	2.89035	4.18295e-14	2.73286e-12
AT4G04340_1	12.6693	4.32329	2.93048	1.47662e-10	6.40515e-09
AT4G04470_1	15.1024	7.20937	2.09483	0.000456485	0.00420491
AT4G04770_1	3.83121	2.10422	1.82072	1.32915e-05	0.00021091
AT4G04890_1	10.6026	5.38428	1.96918	0.00345575	0.0216809
AT4G07410_1	5.90464	2.56463	2.30234	0.000411557	0.0038277
AT4G08280_2	21.7359	10.9844	1.9788	0.00332736	0.021025
AT4G08390_1	8.53873	4.66371	1.83089	5.00745e-05	0.000663315
AT4G08390_2	12.5589	7.83271	1.60339	3.69135e-05	0.000506079
AT4G08520_1	16.3481	8.71155	1.87661	1.58588e-06	3.27832e-05
AT4G08950_1	4.61439	2.26813	2.03445	0.000603932	0.00532224
AT4G09000_1	12.7664	4.8421	2.63655	9.61082e-56	7.82469e-53
AT4G09010_1	6.94178	2.76426	2.51127	2.02717e-47	1.12924e-44
AT4G09020_1	14.9289	6.85036	2.17929	1.03433e-05	0.000169989
AT4G09040_2	6.3995	2.75287	2.32467	2.55635e-08	7.51566e-07
AT4G09730_1	5.1628	2.51676	2.05137	0.00336255	0.0212093
AT4G10000_1	20.1605	7.41353	2.71943	0.00127217	0.00965204
AT4G10080_1	10.2866	5.76686	1.78375	2.69706e-05	0.000389436
AT4G10140_1	15.5891	6.87872	2.26629	0.00661132	0.0362373
AT4G10610_1	13.0024	6.62616	1.96229	0.00186256	0.0131686
AT4G10790_2	2.61455	4.22498	0.618831	0.000157473	0.00175441
AT4G10840_1	6.12465	3.95513	1.54853	0.00248099	0.0165536
AT4G10920_1	10.1178	5.1185	1.97671	6.36377e-06	0.00011078
AT4G11010_1	17.2273	4.27329	4.0314	9.6599e-45	5.11202e-42
AT4G11150_1	19.8465	8.63568	2.2982	3.61918e-12	1.85949e-10
AT4G11380_1	12.3499	5.50201	2.24461	0.00113156	0.00886489
AT4G11420_1	11.7784	5.17524	2.27591	1.48822e-05	0.000233898
AT4G11560_1	14.0002	6.05125	2.31361	0.00267935	0.0176029
AT4G11600_1	10.859	4.42081	2.45634	1.57061e-16	1.28863e-14
AT4G12060_1	9.11858	4.25374	2.14366	0.000251253	0.00256191
AT4G12290_1	4.4913	2.88764	1.55536	0.00452439	0.0268571
AT4G12310_2	4.29636	2.3974	1.7921	0.0018285	0.0129798
AT4G12600_1	12.1969	7.0742	1.72414	0.000128671	0.00148594
AT4G12720_1	8.93037	3.4719	2.57219	2.47562e-05	0.000361406
AT4G12730_2	4.07359	2.56221	1.58988	7.37699e-07	1.61652e-05
AT4G12780_1	12.7933	7.02561	1.82095	0.00839367	0.043936
AT4G12790_1	10.279	5.77413	1.78017	0.00767144	0.0410696
AT4G12830_1	12.5671	5.68229	2.21163	1.91254e-07	4.77412e-06
AT4G13150_1	18.0983	5.73658	3.15489	0.000713357	0.0061135
AT4G13250_1	4.32264	2.65831	1.62609	0.00016306	0.00180526
AT4G13270_1	5.94959	2.83328	2.0999	0.00550981	0.0315615
AT4G13340_2	7.10162	4.34376	1.6349	2.21049e-12	1.15821e-10
AT4G13500_1	5.99546	3.23502	1.8533	0.000631973	0.00552337
AT4G13520_1	8.2134	4.81304	1.70649	0.00609264	0.0338857
AT4G13590_1	15.5882	9.65573	1.6144	0.000712666	0.00611252
AT4G13730_2	22.5426	8.88111	2.53826	0.00192539	0.0135404
AT4G13830_1	9.10733	3.93231	2.31603	2.72627e-05	0.000392583
AT4G13840_1	2.18581	3.87693	0.563799	1.35974e-22	1.97144e-20
AT4G14100_1	14.267	8.91225	1.60083	0.00477428	0.0280572
AT4G14160_1	16.4343	8.59949	1.91107	0.00122451	0.00939145
AT4G14210_1	14.0347	7.43734	1.88706	1.08721e-05	0.000177852
AT4G14240_1	8.57545	3.17044	2.70482	0.000153667	0.00171925
AT4G14410_1	2.07742	3.22705	0.643752	0.000131876	0.00152044
AT4G14710_1	10.3185	6.75732	1.52701	0.00352738	0.0220258
AT4G14800_1	10.8766	5.89729	1.84433	0.00799509	0.0424091
AT4G14870_1	3.66664	5.71935	0.641094	8.39101e-08	2.23704e-06
AT4G15000_1	9.15234	5.71134	1.60249	6.66518e-05	0.000845854
AT4G15030_1	11.8772	7.41704	1.60135	0.000233557	0.00241403
AT4G15420_1	18.1852	3.69185	4.92576	0.00284583	0.0185241
AT4G15470_1	12.0129	7.47796	1.60644	0.000144594	0.00164204
AT4G15560_1	7.00691	4.36289	1.60602	7.09966e-07	1.56874e-05
AT4G15930_1	13.876	5.77538	2.40262	2.47581e-06	4.79925e-05
AT4G16146_1	3.52934	2.24167	1.57442	9.05296e-07	1.9279e-05
AT4G16390_1	4.96066	2.42699	2.04395	0.0011579	0.00900137
AT4G16390_2	6.528	3.51236	1.85858	0.00435341	0.0259777
AT4G16720_1	8.08966	4.18016	1.93525	3.69814e-25	6.86687e-23
AT4G16830_2	10.8819	3.59624	3.0259	2.03138e-07	5.04697e-06
AT4G16990_3	7.19252	2.90996	2.47169	0.000668275	0.00578334
AT4G17150_1	10.3842	6.89795	1.5054	0.0084144	0.0439576
AT4G17270_1	12.8871	6.64436	1.93955	0.00675153	0.0368721
AT4G17370_1	5.9455	3.45195	1.72236	0.00020991	0.00221504
AT4G17530_1	10.7234	5.65691	1.89563	0.00398201	0.0243691
AT4G17560_1	16.5056	7.86834	2.09773	2.66244e-10	1.11381e-08
AT4G17640_1	18.0299	8.33863	2.16222	0.00124004	0.00946714
AT4G17830_1	18.8232	9.60088	1.96057	0.00040632	0.00378759
AT4G17840_1	18.8259	9.89085	1.90337	0.000872116	0.00718884
AT4G17870_1	3.84833	1.98683	1.93692	0.000389754	0.00366355
AT4G18030_1	9.78248	5.32261	1.83791	0.000276611	0.00277647
AT4G18370_1	11.5689	5.07429	2.2799	0.00286136	0.0185909
AT4G18670_1	7.44056	3.99238	1.86369	1.67843e-12	9.0635e-11
AT4G18710_1	7.54984	4.33772	1.74051	8.43371e-07	1.82676e-05
AT4G18760_2	10.1641	4.51055	2.25341	1.8352e-06	3.71392e-05
AT4G18810_1	17.6696	8.55421	2.0656	1.2518e-05	0.000201354
AT4G18975_1	6.88679	3.42898	2.00841	0.00566288	0.0321545
AT4G19110_1	9.71477	4.86802	1.99563	3.7136e-08	1.05658e-06
AT4G19120_1	2.75609	1.51513	1.81904	7.68611e-07	1.68078e-05
AT4G19170_1	6.64479	3.98085	1.66919	0.00197411	0.0137986
AT4G19200_1	5.28574	3.46917	1.52363	0.000115955	0.00136212
AT4G19350_1	7.83856	4.44429	1.76374	0.000197121	0.00211167
AT4G19420_1	6.07783	1.91379	3.1758	0.00878566	0.0453818
AT4G19640_1	7.94015	4.61278	1.72134	5.04022e-05	0.000666821
AT4G19670_1	8.11529	3.99353	2.03211	0.00820369	0.043155
AT4G19830_1	9.04587	3.91685	2.30947	0.00184419	0.0130648
AT4G20130_1	7.83163	3.93329	1.99112	0.000346125	0.00333946
AT4G20260_1	2.26326	3.41921	0.661925	5.33694e-22	7.33586e-20
AT4G20325_1	12.9511	6.78143	1.90978	0.00395832	0.0242587
AT4G20410_1	18.2239	7.5082	2.42719	1.85877e-05	0.000281937
AT4G20830_1	5.65768	2.94958	1.91813	0.000196762	0.00210996
AT4G20850_1	8.66707	5.00707	1.73097	0.00680062	0.037102
AT4G21110_1	23.5501	9.32706	2.52492	3.38248e-05	0.000472921
AT4G21150_1	22.8695	10.3226	2.21548	0.000880609	0.00724756
AT4G21210_2	9.67971	4.37021	2.21493	3.6323e-14	2.38784e-12
AT4G21790_1	10.9832	6.02832	1.82194	3.77557e-05	0.00051672
AT4G22010_1	9.10115	3.87019	2.35161	0.00360418	0.0223734
AT4G22220_1	14.6744	8.0934	1.81313	5.66328e-11	2.57254e-09
AT4G22260_1	17.5552	8.21418	2.13718	0.00173785	0.0124701
AT4G22540_1	4.85263	1.78901	2.71247	0.00811068	0.0428147
AT4G22690_2	2.08065	1.33612	1.55724	0.00653409	0.0358883
AT4G22930_1	31.4022	14.2964	2.19651	0.0006701	0.00578966
AT4G23170_1	3.27798	1.85348	1.76855	6.72344e-05	0.000851207
AT4G23180_1	5.05064	2.36299	2.1374	0.0021479	0.0147142
AT4G23470_1	12.1763	4.87463	2.49789	3.18223e-15	2.32281e-13
AT4G23620_1	12.7398	3.95388	3.2221	0.000956067	0.00771267
AT4G23710_1	17.898	8.84577	2.02334	1.13892e-05	0.000184883
AT4G23760_1	20.2313	7.07984	2.85759	0.00507605	0.029503
AT4G24460_1	13.0429	5.54304	2.35301	4.55159e-05	0.000611346
AT4G24620_2	5.2101	2.47419	2.10578	1.92034e-05	0.000290084
AT4G24770_3	3.58919	1.82363	1.96815	1.45019e-34	5.11626e-32
AT4G24920_1	7.72873	4.50348	1.71617	0.00298502	0.0192408
AT4G24930_2	4.50535	2.15225	2.09332	1.01293e-12	5.58377e-11
AT4G25050_2	6.72207	4.38785	1.53197	1.09479e-14	7.52423e-13
AT4G25080_1	8.42959	4.43604	1.90025	0.00102132	0.00815824
AT4G25080_2	8.33053	3.3832	2.46232	4.16145e-15	2.99624e-13
AT4G25100_1	5.32632	2.06009	2.58548	2.9744e-29	7.87026e-27
AT4G25130_1	7.14221	4.75888	1.50082	1.0252e-08	3.23902e-07
AT4G25130_2	6.3604	3.57952	1.77688	3.05104e-13	1.7841e-11
AT4G25370_1	11.996	7.82771	1.5325	3.91662e-08	1.11135e-06
AT4G25570_1	10.0921	4.67448	2.15899	1.55281e-07	3.96979e-06
AT4G25620_1	4.86883	2.10903	2.30856	0.00857198	0.0445827
AT4G25630_1	1.75548	2.92387	0.600395	0.00234273	0.0157933
AT4G25630_2	7.93472	3.07613	2.57945	0.000515951	0.00463174
AT4G26130_2	2.50334	1.60177	1.56286	0.000478457	0.0043505
AT4G26230_2	5.89375	3.111	1.89448	8.95985e-07	1.91405e-05
AT4G26240_1	3.96571	2.48185	1.59788	1.58875e-05	0.000247284
AT4G26300_1	21.6405	11.3287	1.91024	0.00407499	0.0247587
AT4G26370_1	10.3546	4.09012	2.53162	1.97442e-10	8.40813e-09
AT4G26510_3	22.0868	8.98003	2.45955	0.000151232	0.001701
AT4G26555_1	8.22481	5.34372	1.53915	0.000397749	0.00372876
AT4G26650_1	4.44793	2.38972	1.86127	9.91541e-05	0.00119527
AT4G26670_1	9.12225	3.34236	2.72929	6.28961e-17	5.32554e-15
AT4G26690_1	5.72402	3.41207	1.67758	5.62376e-06	9.85461e-05
AT4G26710_1	25.1775	9.56839	2.63132	4.27865e-16	3.40491e-14
AT4G26840_1	10.008	6.11295	1.63718	0.000416267	0.00386471
AT4G26870_1	12.8506	5.47809	2.34581	0.000112054	0.00132068
AT4G27130_1	14.7514	7.64978	1.92834	2.2747e-07	5.56014e-06
AT4G27320_1	9.25677	4.17052	2.21957	0.00159262	0.0116572
AT4G27390_1	7.81041	3.6675	2.12963	0.0037146	0.0229914
AT4G27500_3	12.2648	7.57466	1.61919	0.000791908	0.00665731
AT4G27600_1	4.156	2.63174	1.57918	0.00252066	0.016779
AT4G27600_2	3.30127	1.72725	1.91129	4.57888e-05	0.00061423
AT4G27800_1	21.6481	11.2589	1.92276	7.01286e-08	1.89347e-06
AT4G27820_1	26.729	8.84776	3.02099	3.89987e-05	0.000529861
AT4G27960_1	4.90545	2.7059	1.81287	5.47557e-05	0.000717246
AT4G27990_1	4.37382	2.55532	1.71166	0.000370575	0.00351449
AT4G28030_1	6.90866	4.2081	1.64175	0.00291375	0.0188734
AT4G28300_2	6.32978	2.23803	2.82828	0.00496293	0.028909
AT4G28440_1	6.00379	3.14029	1.91186	0.000246803	0.00252383
AT4G28610_1	10.6939	5.16679	2.06974	0.0084912	0.0442576
AT4G28770_1	8.11716	5.05214	1.60668	0.0053661	0.0309509
AT4G28880_1	14.983	6.67766	2.24375	0.009844	0.0497322
AT4G29010_1	10.1922	5.68304	1.79344	0.0035493	0.0221366
AT4G29130_1	22.5771	8.26223	2.73257	6.36058e-05	0.000812637
AT4G29210_1	12.2626	7.22895	1.69631	0.00648942	0.0357027
AT4G29350_2	9.85225	4.89309	2.01351	1.42317e-13	8.75744e-12
AT4G29380_1	3.72603	2.4456	1.52357	9.39403e-06	0.000156085
AT4G29390_1	4.31231	2.84652	1.51494	6.75225e-05	0.000853833
AT4G29400_2	13.5744	5.13607	2.64295	0.00483041	0.0282763
AT4G29410_1	11.846	6.9261	1.71034	4.0265e-07	9.36626e-06
AT4G29480_1	24.7882	9.91276	2.50063	1.86444e-06	3.76589e-05
AT4G29510_1	12.2072	5.25993	2.32078	0.00204811	0.0142052
AT4G29590_1	14.9126	8.1248	1.83545	4.59643e-05	0.000614251
AT4G29670_1	15.331	7.10405	2.15806	7.51821e-08	2.01961e-06
AT4G29900_1	23.8057	10.9531	2.17343	0.000200367	0.0021421
AT4G30210_1	4.70441	2.15367	2.18437	0.00982746	0.049696
AT4G30210_3	9.42079	4.05882	2.32107	8.73941e-07	1.87623e-05
AT4G30310_1	12.3072	5.78145	2.12873	0.00177143	0.0126574
AT4G30530_1	4.80167	2.56699	1.87054	8.01808e-05	0.000990238
AT4G30600_1	16.8149	6.14449	2.73658	2.43518e-05	0.000356486
AT4G30920_3	3.77028	2.14094	1.76104	0.00232672	0.0157254
AT4G30950_1	17.6007	7.52706	2.33832	1.47416e-22	2.10845e-20
AT4G30993_1	6.00286	3.20581	1.87249	7.03632e-05	0.000882374
AT4G31040_1	14.7003	7.16836	2.05072	8.33986e-06	0.00014078
AT4G31310_1	10.5309	6.17515	1.70538	0.0044232	0.0263302
AT4G31390_1	21.7177	8.97459	2.41991	0.000958426	0.00772581
AT4G31780_2	9.57941	5.58295	1.71583	0.00918506	0.0469636
AT4G31985_1	3.94919	2.52861	1.5618	0.000193145	0.0020796
AT4G31990_1	16.9536	8.58237	1.9754	7.39595e-10	2.80569e-08
AT4G32060_1	8.14146	3.88558	2.0953	9.68666e-05	0.0011717
AT4G32150_1	8.24023	4.08619	2.01661	2.49386e-05	0.000363568
AT4G32180_1	15.8812	7.26603	2.18568	0.00435416	0.0259777
AT4G32260_1	2.43476	4.81838	0.505307	3.19326e-88	8.44936e-85
AT4G32260_2	4.29204	2.62141	1.6373	2.13602e-54	1.50717e-51
AT4G32340_1	10.3805	5.7073	1.81882	3.18073e-09	1.12216e-07
AT4G32410_1	8.09359	4.6726	1.73214	7.24073e-07	1.59326e-05
AT4G32520_1	12.801	7.92009	1.61626	0.00392506	0.0241229
AT4G32530_1	12.1969	6.01681	2.02714	1.17027e-08	3.65374e-07
AT4G32551_1	5.93557	3.03982	1.95261	0.00173329	0.0124512
AT4G32760_2	15.3935	7.87478	1.95478	0.005645	0.0321219
AT4G32915_1	24.1681	10.2719	2.35283	3.32814e-06	6.29019e-05
AT4G32940_1	8.55446	4.02794	2.12378	0.000928715	0.00753797
AT4G32980_1	9.05086	4.36996	2.07115	0.00160757	0.0117261
AT4G33090_1	15.3859	7.61504	2.02046	9.86468e-06	0.000162883
AT4G33250_1	14.508	8.37522	1.73225	3.12033e-05	0.000441518
AT4G33360_1	9.42584	3.50708	2.68766	0.000482185	0.00437688
AT4G33380_1	19.6001	10.9212	1.79469	0.00630444	0.0348986
AT4G33480_2	4.9653	2.15735	2.30157	0.000639896	0.00557879
AT4G33500_1	9.77017	5.58834	1.74832	0.000981411	0.00788108
AT4G33510_2	7.3047	4.45285	1.64045	1.18597e-06	2.49549e-05
AT4G33520_1	17.5342	8.75376	2.00305	0.000292324	0.00290239
AT4G33530_1	6.78512	4.41618	1.53642	0.00599954	0.0335974
AT4G33625_1	8.71164	5.31269	1.63978	0.000473038	0.00430493
AT4G33680_1	8.2628	5.4608	1.51311	0.00149485	0.0110795
AT4G34090_1	11.5027	6.82082	1.68641	0.000755871	0.00641036
AT4G34150_1	6.20704	3.09584	2.00496	3.20314e-07	7.56741e-06
AT4G34240_1	3.12059	1.59773	1.95314	0.000582377	0.00515374
AT4G34270_1	15.2506	7.89711	1.93116	0.007949	0.0422775
AT4G34640_1	16.9842	9.45848	1.79566	0.00569002	0.0322739
AT4G34700_1	17.1999	11.3519	1.51515	2.05243e-05	0.000306821
AT4G34720_1	8.99671	5.21409	1.72546	4.96436e-09	1.68948e-07
AT4G34950_1	3.05013	1.58435	1.92516	5.21683e-13	2.98459e-11
AT4G35250_1	11.3195	5.80944	1.94846	2.62013e-07	6.31697e-06
AT4G35260_1	7.80331	4.99529	1.56213	0.00297839	0.0192215
AT4G35360_1	8.58972	3.65631	2.34929	0.000145157	0.00164667
AT4G35450_1	6.49526	3.96567	1.63787	1.12539e-07	2.94102e-06
AT4G35630_1	5.59455	3.3267	1.68171	0.00402845	0.0245747
AT4G35760_1	6.4095	4.14654	1.54575	0.0015068	0.0111525
AT4G35790_1	18.9361	7.03222	2.69276	2.63783e-07	6.34517e-06
AT4G35800_2	6.55577	3.27939	1.99908	3.83827e-10	1.58071e-08
AT4G35830_1	16.3154	6.92526	2.35592	1.06637e-20	1.32378e-18
AT4G35850_1	14.4701	6.97211	2.07543	0.00201556	0.0140162
AT4G35860_1	13.2283	7.12791	1.85584	0.0084063	0.0439481
AT4G35880_1	11.8165	4.29253	2.75281	0.00136753	0.0103018
AT4G35890_1	20.2977	8.52301	2.38152	6.31808e-05	0.000810552
AT4G36130_1	3.87933	7.02201	0.552452	6.80023e-05	0.000858874
AT4G36210_1	15.2374	7.91974	1.92397	2.87708e-05	0.000412616
AT4G36250_1	3.88628	5.96956	0.651016	3.55334e-05	0.000491615
AT4G36390_2	3.38524	1.91745	1.76549	0.00171486	0.0123723
AT4G36760_1	17.3636	6.53724	2.65611	3.45595e-06	6.52011e-05
AT4G36800_1	19.0949	9.16851	2.08266	2.02555e-06	4.05263e-05
AT4G36910_1	15.9163	7.09152	2.24442	0.000143053	0.00162979
AT4G36960_2	13.9061	6.67844	2.08224	0.00974768	0.0493397
AT4G37080_1	7.87881	4.11812	1.91321	0.00333534	0.0210502
AT4G38350_1	16.1844	8.66589	1.86759	0.00091179	0.00743893
AT4G38510_1	20.0955	7.35615	2.7318	6.15539e-08	1.67909e-06
AT4G38680_2	2.30057	4.96831	0.463049	6.98762e-32	2.24112e-29
AT4G38790_1	22.547	6.86396	3.28484	0.000174789	0.00191508
AT4G38920_1	19.6604	7.84169	2.50716	1.61933e-37	6.34778e-35
AT4G39080_1	25.284	11.9041	2.12397	1.05786e-12	5.80122e-11
AT4G39710_1	11.3748	5.37706	2.11542	4.3257e-08	1.21441e-06
AT4G39710_2	3.50896	1.971	1.78029	0.000591515	0.00522588
AT4G39840_1	6.16353	3.58212	1.72064	5.22931e-08	1.43801e-06
AT4G39850_1	19.9325	8.62452	2.31114	0.000760735	0.00644645
AT4G39960_1	3.0482	1.97083	1.54666	0.000602509	0.00531413
AT4G40040_1	3.58934	2.07632	1.7287	1.52524e-10	6.56223e-09
AT5G01020_1	7.73858	4.52656	1.7096	0.00145189	0.010837
AT5G01350_1	15.5603	6.22671	2.49896	2.96349e-10	1.23487e-08
AT5G01500_1	7.86125	3.85342	2.04007	0.00756053	0.0405579
AT5G01710_1	3.87632	1.56312	2.47986	0.000221455	0.0023047
AT5G01750_2	6.44462	2.30878	2.79136	9.27595e-12	4.42436e-10
AT5G01820_1	2.01428	4.70983	0.427675	0.00562675	0.0320352
AT5G01920_2	8.64719	4.72967	1.82828	0.000965321	0.00776364
AT5G02130_1	9.74552	5.33284	1.82746	0.000571089	0.00507507
AT5G02450_2	8.17292	5.08335	1.60778	4.0849e-12	2.05879e-10
AT5G02610_1	4.88914	2.55874	1.91076	0.00010941	0.00129666
AT5G02710_2	14.9071	8.18175	1.82199	0.00088723	0.00728506
AT5G02770_1	6.30949	3.4617	1.82266	0.00648969	0.0357027
AT5G02790_1	7.11622	4.14746	1.7158	9.9723e-16	7.70415e-14
AT5G03455_1	9.36276	5.97607	1.56671	0.00458304	0.0271595
AT5G03520_1	15.2969	6.94191	2.20356	0.00195183	0.0136538
AT5G03740_1	7.50184	4.61619	1.62512	0.0083743	0.0438563
AT5G03850_1	6.64285	4.4158	1.50434	1.23911e-06	2.60214e-05
AT5G03880_1	20.9075	10.1455	2.06076	3.76885e-15	2.73216e-13
AT5G03900_1	5.89258	3.8802	1.51863	0.000282891	0.0028194
AT5G03905_1	19.5185	11.2088	1.74135	0.0084071	0.0439481
AT5G03910_1	13.2437	8.31587	1.59258	0.00732702	0.0395659
AT5G03910_2	4.17251	2.10489	1.98229	0.00648547	0.0357027
AT5G04130_1	20.7938	8.79713	2.3637	0.00266062	0.0175233
AT5G04430_1	18.059	9.37805	1.92567	0.000230051	0.00238946
AT5G04440_1	2.84219	1.57757	1.80163	0.000932006	0.00755889
AT5G04920_1	8.46372	4.5531	1.85889	0.00321455	0.0204256
AT5G05190_1	38.9502	9.29058	4.19244	1.67677e-12	9.0635e-11
AT5G05200_1	17.3808	6.15828	2.82235	3.813e-18	3.6688e-16
AT5G05520_1	14.1011	7.3268	1.92459	0.00989789	0.0499329
AT5G05780_1	17.8407	4.33188	4.11846	5.11405e-09	1.7293e-07
AT5G05820_1	10.5254	5.29426	1.98808	0.00362409	0.0224838
AT5G06060_1	20.2424	8.90108	2.27415	0.000633237	0.00552985
AT5G06110_1	9.75405	5.54729	1.75835	0.00983832	0.0497272
AT5G06130_2	3.64861	2.13221	1.71119	0.00758821	0.0406651
AT5G06290_1	4.47391	1.59232	2.80969	2.42126e-33	8.00832e-31
AT5G06360_1	4.38273	2.67478	1.63854	0.0024823	0.0165536
AT5G06600_1	16.7126	9.09304	1.83796	6.10794e-05	0.000787411
AT5G06700_1	4.85348	2.6118	1.85829	2.85471e-09	1.02075e-07
AT5G06700_2	13.833	4.61232	2.99913	0.000680827	0.00587755
AT5G07020_1	9.0015	5.74866	1.56584	4.53295e-07	1.04753e-05
AT5G07030_1	3.78316	2.41368	1.56738	0.00824912	0.0433079
AT5G07290_1	9.05534	4.26288	2.12423	0.00238899	0.0160949
AT5G07300_1	11.7577	5.23055	2.24788	0.00324187	0.0205466
AT5G08050_1	2.85772	1.69571	1.68527	1.64974e-05	0.000254903
AT5G08060_1	16.0297	7.34251	2.18314	1.79098e-08	5.44704e-07
AT5G08180_1	14.119	6.88954	2.04934	8.15495e-05	0.00100363
AT5G08270_1	20.0873	6.6655	3.01363	9.20323e-13	5.12669e-11
AT5G08400_1	10.2999	5.78072	1.78178	0.00752672	0.040397
AT5G08530_1	15.8144	6.87946	2.29879	1.89766e-06	3.81841e-05
AT5G09330_1	6.66616	3.10691	2.14559	6.58914e-08	1.78819e-06
AT5G09620_2	3.94407	2.0512	1.92281	0.000128626	0.00148594
AT5G09820_2	2.62608	1.52243	1.72493	0.0059498	0.0334545
AT5G10010_2	17.6395	8.5653	2.05942	0.00917992	0.04696
AT5G10360_1	9.66561	5.26326	1.83643	5.71796e-14	3.71281e-12
AT5G10560_2	4.34958	2.00165	2.173	0.00320091	0.0203719
AT5G10780_1	20.0834	8.2738	2.42736	1.41558e-09	5.22039e-08
AT5G10810_1	12.3076	4.78844	2.57028	0.000177836	0.00194038
AT5G10870_1	7.41267	3.32021	2.23259	0.00389999	0.0239985
AT5G11000_1	2.97541	5.53	0.538048	0.00190839	0.0134566
AT5G11060_2	5.27308	2.81418	1.87375	0.000888693	0.00729141
AT5G11150_1	16.6558	7.7644	2.14514	0.00857778	0.044591
AT5G11170_1	12.2997	6.36162	1.93342	2.27753e-06	4.48054e-05
AT5G11200_1	16.7436	7.63232	2.19378	1.06046e-07	2.80599e-06
AT5G11490_2	11.1184	5.83083	1.90683	0.00103327	0.00824742
AT5G11520_1	7.66552	3.84702	1.99258	3.92081e-06	7.25487e-05
AT5G11580_1	4.83091	2.75987	1.75041	0.00601539	0.033615
AT5G11880_1	13.9899	7.57994	1.84565	0.000372879	0.00353001
AT5G12040_1	4.00108	1.9872	2.01343	0.00131275	0.00991024
AT5G12130_1	20.8409	9.02055	2.31038	1.08127e-07	2.8539e-06
AT5G12140_1	9.69044	5.04024	1.92261	1.20626e-08	3.744e-07
AT5G12150_1	26.3057	12.9144	2.03693	2.16843e-05	0.000320989
AT5G12200_1	16.029	7.28452	2.20042	0.00804524	0.0426351
AT5G12370_1	13.1417	5.13065	2.56141	2.57274e-06	4.9599e-05
AT5G12470_1	22.7281	11.6593	1.94936	0.000152696	0.0017102
AT5G12860_1	8.54133	5.53019	1.54449	3.171e-07	7.50824e-06
AT5G12860_2	4.68336	2.78591	1.68109	4.17571e-16	3.34816e-14
AT5G12950_1	5.38732	2.28515	2.35753	0.00252477	0.0167853
AT5G13020_1	20.9252	11.7348	1.78318	0.00290307	0.0188273
AT5G13120_2	3.72654	2.22234	1.67686	6.94935e-05	0.000874577
AT5G13180_1	3.36748	1.8922	1.77966	0.000388583	0.00365579
AT5G13240_1	18.2441	8.19852	2.2253	0.00278423	0.0181903
AT5G13300_1	19.2409	9.65854	1.99211	0.00568483	0.0322618
AT5G13410_1	14.033	8.54513	1.64222	0.0028677	0.0186207
AT5G13430_1	13.0549	7.37819	1.76939	0.00199056	0.0138598
AT5G13440_1	9.89828	5.97583	1.65638	0.000857389	0.00710619
AT5G13450_1	11.1442	6.89384	1.61654	2.73697e-06	5.26692e-05
AT5G13510_2	6.38928	3.5336	1.80815	5.48178e-10	2.15256e-08
AT5G13520_1	8.89805	4.57563	1.94466	4.41027e-09	1.52544e-07
AT5G13630_1	7.53401	3.49298	2.1569	6.41328e-27	1.41413e-24
AT5G13770_2	13.0186	6.31719	2.06083	0.000855966	0.00709996
AT5G13890_2	6.63032	3.31836	1.99807	0.00295383	0.0190979
AT5G14030_1	17.5564	10.9339	1.60568	1.81776e-07	4.55904e-06
AT5G14040_1	5.29427	3.34728	1.58166	2.25855e-06	4.46372e-05
AT5G14060_1	9.43028	3.2643	2.88891	2.02373e-05	0.000302959
AT5G14260_2	17.4415	8.49742	2.05256	0.000172433	0.00189122
AT5G14270_1	16.2453	8.25332	1.96834	0.000178258	0.00194103
AT5G14320_2	7.93748	4.41694	1.79705	8.80766e-14	5.64971e-12
AT5G14540_2	5.92737	3.54994	1.66971	0.000326465	0.00320529
AT5G14740_2	5.95176	2.34684	2.53608	1.46892e-39	6.47795e-37
AT5G14920_1	5.03272	2.77239	1.8153	2.20752e-27	5.31009e-25
AT5G14970_1	13.8614	9.18745	1.50873	0.000333839	0.00325355
AT5G15320_1	20.9959	9.86017	2.12937	3.75029e-06	7.01291e-05
AT5G15650_1	6.64935	3.5941	1.85007	5.52886e-05	0.000722438
AT5G15780_1	7.4793	4.46601	1.67472	1.43789e-13	8.79689e-12
AT5G16050_1	14.14	8.49232	1.66503	0.000195513	0.00210082
AT5G16220_2	4.0711	2.11784	1.92229	0.00377468	0.0232952
AT5G16390_2	3.46443	1.9246	1.80007	0.000214014	0.0022427
AT5G16400_1	12.2396	6.29328	1.94486	1.12766e-05	0.000183336
AT5G16540_1	6.51812	3.15447	2.06631	0.00851064	0.044329
AT5G16620_2	13.2114	8.41072	1.57078	0.00140054	0.0104921
AT5G16650_1	7.71993	3.96893	1.94509	0.000730479	0.00621494
AT5G16715_2	16.8982	8.13468	2.0773	2.223e-05	0.000328149
AT5G16830_1	18.6572	6.15401	3.03171	0.00116087	0.00900732
AT5G17020_1	12.7982	6.68952	1.91318	0.00153349	0.0113341
AT5G17230_1	5.89471	3.72182	1.58382	9.11951e-10	3.42273e-08
AT5G17530_1	17.5672	9.97796	1.7606	0.0034256	0.0215428
AT5G18100_1	14.8763	7.93158	1.87558	0.00406793	0.02473
AT5G18190_1	14.2001	6.85661	2.07101	0.00109193	0.00861818
AT5G18230_1	7.29695	4.40903	1.655	0.00113057	0.00886363
AT5G18400_1	13.3741	5.7847	2.31197	0.000865456	0.00714508
AT5G18500_1	11.618	6.17233	1.88228	0.00321528	0.0204256
AT5G18590_1	11.6625	5.65881	2.06095	0.00410663	0.0248938
AT5G18650_1	8.90296	4.30093	2.07001	3.0137e-05	0.000431041
AT5G18660_3	3.70038	2.0174	1.83424	2.4112e-06	4.69985e-05
AT5G18800_1	21.1725	12.4201	1.7047	0.00551074	0.0315615
AT5G18940_1	17.7105	9.20673	1.92365	0.00451799	0.0268341
AT5G19010_1	8.35365	4.12428	2.02548	0.00186583	0.0131829
AT5G19140_1	7.19031	3.59925	1.99773	6.7456e-20	7.76037e-18
AT5G19190_1	4.96154	2.0256	2.44942	0.00120572	0.00928096
AT5G19220_1	5.05751	2.94602	1.71673	7.73134e-26	1.57363e-23
AT5G19240_1	3.57679	1.89964	1.88288	2.30062e-09	8.33897e-08
AT5G19250_1	4.03877	2.33609	1.72886	9.08026e-29	2.34404e-26
AT5G19440_1	7.54037	3.10603	2.42766	9.69663e-06	0.000160358
AT5G19540_1	2.80955	1.80206	1.55908	0.00484179	0.0282993
AT5G19590_2	3.01387	1.75409	1.71819	2.62204e-05	0.000381205
AT5G19680_1	20.0722	8.11796	2.47257	0.00296272	0.0191438
AT5G19750_1	40.6077	18.376	2.20982	0.00162368	0.0117948
AT5G19760_1	11.0689	6.96342	1.58958	2.83335e-08	8.26122e-07
AT5G19770_1	4.55945	2.93128	1.55545	1.76964e-06	3.61075e-05
AT5G19780_1	15.2923	6.89405	2.21819	4.98181e-09	1.68998e-07
AT5G19820_1	8.67684	5.53851	1.56664	0.000705152	0.00606282
AT5G19855_1	11.5065	5.11885	2.24787	3.02841e-05	0.000432559
AT5G20080_1	31.2019	18.8164	1.65823	0.000716731	0.00613744
AT5G20090_1	13.4522	8.32863	1.61518	0.00429859	0.0257623
AT5G20140_1	14.304	7.74178	1.84764	0.000303586	0.00300858
AT5G20280_1	18.0361	8.98538	2.00728	6.89239e-08	1.86571e-06
AT5G20350_1	16.2598	7.63325	2.13012	0.00198476	0.0138476
AT5G20500_1	14.6839	7.92036	1.85395	7.92087e-06	0.000134782
AT5G20570_1	11.5322	6.41982	1.79634	0.00121586	0.00933865
AT5G20650_1	2.96162	1.71017	1.73177	7.27021e-05	0.000907405
AT5G21090_1	18.2514	7.87254	2.31837	2.13077e-16	1.73477e-14
AT5G21430_2	10.8178	4.04798	2.6724	2.92931e-09	1.0404e-07
AT5G22000_2	13.3418	6.87769	1.93987	0.00031423	0.00310824
AT5G22280_1	14.1451	6.06492	2.33228	0.00528084	0.0305089
AT5G22340_1	5.38173	3.44018	1.56437	0.00431519	0.0258294
AT5G22440_1	11.7175	7.40019	1.5834	0.00805286	0.0426351
AT5G22620_1	14.1922	6.39095	2.22068	0.000165395	0.00182538
AT5G22780_1	25.2212	15.5249	1.62457	0.00966702	0.0489784
AT5G22830_2	21.0052	8.9357	2.35071	7.18801e-07	1.58496e-05
AT5G22840_1	22.3677	11.093	2.01638	5.94849e-05	0.000768729
AT5G23070_1	5.30004	2.72316	1.94628	0.00255135	0.0169195
AT5G23450_1	9.49202	5.90515	1.60741	0.00672721	0.0367963
AT5G23520_1	12.5986	7.18679	1.75303	0.00883448	0.0455895
AT5G23540_1	22.688	8.14206	2.78652	5.08306e-08	1.40468e-06
AT5G23760_1	7.55492	12.3155	0.613449	0.000102834	0.00123401
AT5G23940_1	3.95668	2.03362	1.94564	0.00302496	0.0194627
AT5G24060_1	14.895	7.82698	1.90303	0.00166997	0.0120813
AT5G24400_2	3.24969	1.43725	2.26105	0.00730677	0.039517
AT5G24490_1	13.9668	6.73305	2.07436	7.36611e-12	3.59276e-10
AT5G24500_1	19.8434	8.9988	2.20511	0.000417663	0.00387088
AT5G24620_2	14.2715	6.96609	2.0487	0.00552658	0.031618
AT5G24650_2	8.11134	4.47345	1.81322	1.1104e-05	0.000181086
AT5G24660_1	2.78273	4.65376	0.597952	0.000182319	0.00197712
AT5G24670_2	7.97696	2.48002	3.21649	0.000950058	0.00767003
AT5G25220_3	7.67612	4.5369	1.69193	2.80587e-05	0.000403497
AT5G25754_2	12.5296	7.18323	1.74429	0.00425451	0.025527
AT5G25757_1	10.1063	5.52409	1.8295	0.000961545	0.00774406
AT5G25840_1	1.71001	2.83057	0.604124	0.00597304	0.0335556
AT5G26360_1	16.6596	10.1491	1.64149	0.00109297	0.00861998
AT5G26570_3	7.75012	4.62904	1.67424	0.000727789	0.00620702
AT5G26742_3	3.16433	1.628	1.94369	1.25635e-16	1.04702e-14
AT5G26751_1	11.4136	5.4905	2.07879	0.000613736	0.00540415
AT5G27120_1	7.86558	4.4444	1.76977	4.11761e-06	7.5661e-05
AT5G27280_1	3.16322	1.87063	1.69099	6.45913e-05	0.000823578
AT5G27290_1	14.9919	5.28846	2.83484	1.88683e-06	3.80386e-05
AT5G27430_1	16.9549	6.73057	2.51909	5.77306e-05	0.00075064
AT5G27540_1	22.2103	9.87941	2.24814	0.000282899	0.0028194
AT5G27760_1	12.0359	4.79329	2.51099	0.0001629	0.00180526
AT5G28500_1	5.67424	3.63215	1.56222	8.31393e-09	2.65845e-07
AT5G28750_1	8.03709	5.3422	1.50445	6.60043e-07	1.47382e-05
AT5G32450_1	9.72554	4.87134	1.99648	0.0011247	0.00882419
AT5G33320_1	4.73082	2.72135	1.73841	2.2176e-06	4.40358e-05
AT5G33320_2	11.6539	7.0238	1.65921	5.02308e-06	8.98045e-05
AT5G34850_1	16.8524	9.52383	1.7695	2.12675e-05	0.000316589
AT5G35100_2	6.70968	3.47042	1.93339	4.06891e-09	1.41515e-07
AT5G35200_1	7.19098	3.26949	2.19942	0.000414993	0.00385627
AT5G35220_1	6.40161	4.02447	1.59067	0.000372775	0.00353001
AT5G35330_1	7.20977	3.16075	2.28103	0.00630128	0.0348986
AT5G35530_1	13.9477	7.20971	1.93457	1.53488e-07	3.93346e-06
AT5G35590_1	10.4729	6.0894	1.71985	4.09725e-06	7.54179e-05
AT5G35670_1	20.0011	7.76913	2.57443	0.00116166	0.00900732
AT5G36160_1	10.7559	4.94675	2.17435	3.85946e-05	0.000525721
AT5G36210_2	6.92259	2.84515	2.43312	0.00121382	0.00932979
AT5G36250_1	8.29128	3.20581	2.58633	0.00528597	0.0305219
AT5G36290_1	8.88418	4.10464	2.16442	0.0066899	0.0366111
AT5G36880_1	11.7205	6.7665	1.73214	1.93917e-05	0.000291951
AT5G37020_1	23.0066	8.96993	2.56485	0.00180753	0.0128741
AT5G37130_1	6.36105	3.40256	1.86949	1.90262e-05	0.000288088
AT5G37350_1	4.9244	2.15914	2.28072	0.00642647	0.0354813
AT5G37780_1	9.72955	6.11523	1.59104	0.000176049	0.0019249
AT5G37850_1	19.4308	11.0013	1.76623	0.00589874	0.0332263
AT5G38470_1	9.993	6.4517	1.54889	0.00224932	0.0153
AT5G38510_1	11.1376	6.54511	1.70167	0.00616409	0.0342651
AT5G38560_1	7.71481	4.2343	1.82198	0.00350369	0.0219167
AT5G39040_1	25.9434	8.90232	2.91422	0.00609031	0.0338857
AT5G39510_1	10.9338	4.72444	2.31432	2.82559e-09	1.01376e-07
AT5G39570_2	15.4088	7.6956	2.00229	0.000194058	0.00208731
AT5G39590_1	9.08691	5.99425	1.51594	0.000398802	0.00373345
AT5G39760_1	4.78563	2.86071	1.67288	0.00115911	0.00900137
AT5G40370_1	13.1618	3.15578	4.1707	5.26543e-39	2.18414e-36
AT5G40650_1	12.3911	5.80794	2.13347	0.00732629	0.0395659
AT5G40770_1	12.8328	8.32645	1.54121	0.00736869	0.0397504
AT5G40780_1	5.85655	2.39668	2.44362	0.00436643	0.0260216
AT5G40810_1	12.2013	7.43635	1.64077	0.00543793	0.031246
AT5G40850_1	3.39608	1.63365	2.07883	0.000486239	0.00439484
AT5G40930_1	13.9151	5.26381	2.64355	0.00126253	0.00959958
AT5G41340_1	9.71185	5.77936	1.68044	0.00469128	0.0276616
AT5G41685_1	4.12332	2.09172	1.97126	0.000362962	0.00345778
AT5G41700_1	4.39836	2.55867	1.719	3.03528e-09	1.07443e-07
AT5G41960_1	11.1741	5.32073	2.1001	0.005657	0.0321383
AT5G41970_1	14.9863	8.05683	1.86007	0.00933766	0.0476058
AT5G42070_1	5.80541	3.20345	1.81223	7.28415e-05	0.000908073
AT5G42080_1	9.35521	5.65052	1.65564	9.16289e-06	0.000152965
AT5G42090_1	4.27511	2.08742	2.04803	0.00930493	0.0474848
AT5G42130_2	5.46778	3.51491	1.55559	0.00252892	0.0168023
AT5G42270_1	6.11731	2.75206	2.22281	5.4852e-23	8.47839e-21
AT5G42270_2	8.46641	4.95654	1.70813	6.81419e-07	1.51198e-05
AT5G42300_1	13.8628	7.47513	1.85452	3.45117e-13	1.99602e-11
AT5G42310_2	13.4262	7.73182	1.73649	0.00813202	0.042906
AT5G42390_1	12.4917	4.68993	2.66352	9.07085e-22	1.20007e-19
AT5G42620_1	9.08582	4.17617	2.17563	0.00147002	0.0109569
AT5G42740_1	14.4748	7.81511	1.85216	1.13548e-08	3.55559e-07
AT5G42765_2	5.96763	3.77209	1.58205	0.00130863	0.0098862
AT5G42900_1	4.25394	2.31947	1.83401	7.57134e-06	0.000129459
AT5G42980_2	8.99214	3.64599	2.46631	5.14336e-30	1.43256e-27
AT5G43460_1	12.1113	5.43239	2.22947	5.99786e-05	0.000774163
AT5G43745_1	19.8463	9.02072	2.20007	0.00412719	0.024947
AT5G43750_1	10.7505	4.76899	2.25426	1.51439e-08	4.64587e-07
AT5G43760_1	9.17748	4.18819	2.19128	1.08512e-13	6.79581e-12
AT5G43940_1	10.6336	7.01831	1.51513	1.61124e-06	3.32425e-05
AT5G43970_1	6.55029	2.81375	2.32796	1.56201e-05	0.000243839
AT5G44520_1	7.58107	3.01681	2.51294	4.12502e-05	0.000559017
AT5G44680_2	2.96824	1.64617	1.80311	7.01721e-05	0.000881022
AT5G44785_1	11.8991	6.10979	1.94754	0.00308369	0.0197331
AT5G45030_1	8.3445	3.69331	2.25935	3.48702e-05	0.000485613
AT5G45390_1	6.8784	3.25795	2.11127	3.95682e-18	3.77288e-16
AT5G46160_1	12.0516	5.36619	2.24585	0.00573672	0.0324172
AT5G46290_2	6.11638	2.73533	2.23607	5.24859e-10	2.08839e-08
AT5G46420_1	20.5561	10.0192	2.05167	0.00556291	0.03174
AT5G47030_1	9.86661	4.85099	2.03394	3.52899e-08	1.01222e-06
AT5G47040_1	18.22	10.0948	1.8049	0.00544834	0.0312831
AT5G47180_1	11.2232	5.56248	2.01766	0.00109615	0.00863858
AT5G47200_1	16.1208	6.7832	2.37657	6.79168e-07	1.51015e-05
AT5G47570_1	26.9424	16.1948	1.66365	0.000216027	0.00225709
AT5G47780_1	15.5763	6.37576	2.44306	2.78706e-06	5.34388e-05
AT5G47840_1	19.2378	9.02629	2.13131	2.76932e-12	1.42978e-10
AT5G47890_1	21.1695	11.806	1.79312	9.43875e-05	0.00114827
AT5G48150_1	6.80431	2.13103	3.19297	0.00231805	0.0156768
AT5G48220_2	16.3071	7.30931	2.23101	6.21099e-07	1.40765e-05
AT5G48230_1	27.2163	9.52161	2.85837	4.91422e-08	1.36157e-06
AT5G48250_1	7.75373	3.02811	2.56058	0.000150919	0.00169928
AT5G48385_2	12.3229	7.28855	1.69073	0.00298367	0.0192408
AT5G48545_1	11.8859	5.91157	2.01063	0.000615853	0.00541377
AT5G48760_1	4.50472	2.48029	1.81621	0.000127687	0.0014786
AT5G48790_1	9.71368	5.59773	1.73529	0.00203033	0.0140912
AT5G48810_1	13.1063	8.63094	1.51852	0.000727259	0.00620702
AT5G49020_1	25.6484	9.98621	2.56838	0.00119354	0.00921401
AT5G49510_1	16.4448	9.58589	1.71552	0.0058423	0.032961
AT5G49720_1	4.12708	2.51665	1.63991	0.00259961	0.017175
AT5G49890_1	13.2678	6.30911	2.10295	0.000247843	0.00253201
AT5G49910_1	3.95464	2.27236	1.74033	4.06064e-12	2.05636e-10
AT5G49970_1	5.04198	2.11801	2.38053	0.00154702	0.0114171
AT5G50100_1	10.5992	4.86101	2.18046	0.00521721	0.0301908
AT5G50240_1	17.2831	8.35944	2.06749	0.00599333	0.0335937
AT5G50250_2	3.58383	1.68807	2.12303	1.63549e-05	0.000253441
AT5G50740_2	2.76504	5.20216	0.531517	0.00254399	0.0168812
AT5G50810_1	9.00935	4.65403	1.93582	6.4663e-05	0.000823578
AT5G50850_1	15.6187	8.26343	1.8901	1.94943e-06	3.91513e-05
AT5G51010_1	13.8069	7.09777	1.94525	5.56325e-10	2.1615e-08
AT5G51020_1	14.0087	7.16137	1.95615	4.83262e-10	1.94481e-08
AT5G51040_1	14.5089	7.67348	1.89078	0.00403559	0.0245899
AT5G51120_2	15.4591	7.86043	1.9667	0.00643553	0.0354943
AT5G51180_1	14.7035	5.32429	2.7616	0.000402327	0.00375836
AT5G51545_1	4.979	2.92747	1.70079	0.00492139	0.0286986
AT5G51720_1	1.7424	2.66134	0.654707	1.42435e-06	2.96758e-05
AT5G52100_1	17.7942	6.95297	2.55922	0.000108543	0.00129318
AT5G52200_1	7.3714	4.5541	1.61863	0.00422216	0.025405
AT5G52240_1	8.5434	5.48231	1.55836	0.00564853	0.0321247
AT5G52310_3	3.4171	5.45398	0.626534	1.02518e-08	3.23902e-07
AT5G52420_1	4.88799	2.79216	1.75061	0.00183281	0.0130016
AT5G52440_1	3.62587	2.04259	1.77513	0.000575074	0.00510619
AT5G52470_1	1.80135	2.89386	0.622472	1.58845e-07	4.04138e-06
AT5G52470_2	6.12095	3.12913	1.95612	6.72409e-09	2.20334e-07
AT5G52520_1	11.3475	4.99732	2.27072	0.000135319	0.00155002
AT5G52780_2	3.21199	2.02901	1.58304	0.00982207	0.0496925
AT5G52840_1	15.1732	8.18988	1.85268	3.06304e-05	0.000435743
AT5G53000_1	8.10816	4.71256	1.72054	0.00548554	0.0314512
AT5G53120_1	8.96668	3.76261	2.3831	0.000622292	0.00545678
AT5G53140_1	16.4541	10.8789	1.51248	0.000459115	0.00421446
AT5G53300_1	8.67851	4.70534	1.84439	1.69417e-23	2.80174e-21
AT5G53400_1	3.33943	5.20263	0.641874	0.00910933	0.0467118
AT5G53440_4	11.6119	7.06186	1.64431	0.00421609	0.0253829
AT5G53490_1	11.6623	6.22938	1.87214	8.65134e-26	1.72766e-23
AT5G53580_1	6.51693	4.10394	1.58797	0.00122759	0.0094083
AT5G53850_1	5.84851	3.73521	1.56578	0.00127704	0.00968211
AT5G54290_1	10.4789	6.86357	1.52675	0.00906044	0.0464836
AT5G54310_1	7.95161	4.1201	1.92995	3.64149e-05	0.00049989
AT5G54430_2	7.59631	3.76153	2.01947	0.0073861	0.0397887
AT5G54680_1	20.1318	7.92629	2.53987	0.00021034	0.00221666
AT5G54760_1	20.7142	6.63006	3.12428	2.15699e-11	1.01016e-09
AT5G55070_1	22.0059	10.7715	2.04297	0.000157852	0.00175679
AT5G55140_1	26.4173	7.3554	3.59155	0.000529268	0.00474726
AT5G55160_1	12.9204	6.50334	1.98674	2.413e-08	7.13386e-07
AT5G55280_1	9.06633	3.48794	2.59933	7.7204e-07	1.6848e-05
AT5G55290_1	14.4334	7.54036	1.91415	0.00520609	0.0301594
AT5G55730_1	5.26473	2.78751	1.88869	2.56288e-06	4.94992e-05
AT5G55850_2	5.6368	3.32476	1.6954	2.29906e-05	0.000337492
AT5G55960_1	7.26133	4.19877	1.72939	0.00649017	0.0357027
AT5G56150_1	10.4759	4.6675	2.24444	0.00244871	0.0164057
AT5G56280_1	4.74179	2.25156	2.106	0.000231229	0.00239934
AT5G56350_1	31.8905	10.7785	2.95872	0.0044518	0.0264856
AT5G56360_1	17.2655	10.073	1.71403	0.00804904	0.0426351
AT5G56860_2	1.2108	2.58919	0.467637	0.00255869	0.0169469
AT5G56860_4	4.21477	2.02557	2.08078	0.00955447	0.0485243
AT5G56890_2	7.3065	3.58733	2.03675	0.000108987	0.00129318
AT5G57030_1	21.2666	12.6106	1.68641	0.00261041	0.0172355
AT5G57035_1	22.4088	11.3509	1.97419	2.83216e-05	0.000406724
AT5G57040_1	14.0825	8.71555	1.61579	7.52407e-05	0.000933585
AT5G57110_1	24.0203	12.9642	1.85281	0.00158323	0.0116075
AT5G57180_2	5.51328	3.08263	1.7885	0.000154858	0.00172892
AT5G57180_3	1.50548	2.85683	0.526975	0.00385159	0.0237283
AT5G57290_1	1.6473	3.13024	0.526256	7.25996e-19	8.00411e-17
AT5G57330_1	16.0459	9.18418	1.74713	0.000280629	0.0028047
AT5G57345_1	9.82533	4.01751	2.44563	1.89296e-12	1.01187e-10
AT5G57345_2	4.4188	1.89672	2.3297	3.97734e-05	0.000539694
AT5G57370_3	17.3716	8.60469	2.01886	0.00960778	0.0487015
AT5G57580_1	13.5442	8.0285	1.68701	0.00473471	0.0278866
AT5G58030_1	26.4372	11.1063	2.38037	1.47807e-05	0.000232795
AT5G58060_1	13.4064	8.09547	1.65603	0.00219806	0.0149995
AT5G58070_1	14.9881	8.43356	1.7772	0.00081161	0.00680559
AT5G58200_1	10.3901	6.85708	1.51524	0.000164261	0.00181475
AT5G58230_1	11.4401	5.61812	2.03628	0.00273306	0.0179002
AT5G58260_1	4.81297	2.5064	1.92027	0.0022218	0.015142
AT5G58330_2	3.1152	1.81909	1.7125	3.7788e-06	7.05376e-05
AT5G58560_1	6.20594	3.02232	2.05337	1.67672e-05	0.000258318
AT5G58570_1	9.04445	4.37062	2.06938	0.00103638	0.00826604
AT5G58640_2	11.7337	5.18859	2.26144	0.00307561	0.0197286
AT5G58740_1	22.9859	8.94844	2.56871	3.24913e-05	0.00045669
AT5G58930_1	1.72204	3.26472	0.527469	0.00600566	0.0336005
AT5G59160_1	11.2514	5.3031	2.12166	0.00061747	0.00542349
AT5G59850_1	5.44954	3.39413	1.60558	0.000126539	0.00147175
AT5G59890_1	5.11794	3.41115	1.50035	0.000865233	0.00714508
AT5G59910_1	1.8864	3.56995	0.52841	5.94848e-27	1.33955e-24
AT5G59960_1	16.8732	6.63049	2.54479	0.000590846	0.00522432
AT5G60360_1	13.0306	8.62077	1.51154	4.2653e-10	1.74301e-08
AT5G60640_1	9.23466	5.61606	1.64433	8.17782e-05	0.00100411
AT5G60980_1	2.19992	3.75978	0.58512	8.10546e-05	0.000999862
AT5G61020_1	11.0832	6.18586	1.7917	0.00653326	0.0358883
AT5G61170_1	8.56922	4.39225	1.95099	6.39805e-12	3.14963e-10
AT5G61380_2	4.66678	2.23702	2.08616	0.00143101	0.0106962
AT5G61770_1	15.0713	6.29624	2.3937	0.000135812	0.00155399
AT5G61960_1	12.1819	6.39916	1.90367	0.00115919	0.00900137
AT5G62220_2	5.82182	3.2827	1.77349	0.000106874	0.00127814
AT5G62350_1	6.6639	3.48486	1.91224	2.70023e-13	1.5966e-11
AT5G62440_2	3.58868	6.71208	0.53466	0.000107557	0.00128485
AT5G62540_1	8.46135	4.15524	2.03631	0.000257913	0.00261253
AT5G62790_1	12.5801	8.24811	1.52521	5.61097e-05	0.000730462
AT5G62840_1	13.022	5.8608	2.22188	9.46632e-05	0.0011503
AT5G62890_1	9.86974	5.98613	1.64877	0.000188085	0.00203339
AT5G63400_1	10.3294	5.25612	1.96521	1.81651e-12	9.75934e-11
AT5G63510_1	13.4501	6.5512	2.05308	0.00181969	0.0129346
AT5G63860_1	20.9065	10.8657	1.92409	8.40653e-05	0.00103099
AT5G64050_1	16.9688	8.89355	1.90799	3.63491e-05	0.000499634
AT5G64290_2	4.49885	2.65764	1.6928	7.43141e-14	4.79598e-12
AT5G64300_1	4.91383	2.55707	1.92166	0.00896775	0.0461343
AT5G64300_2	3.68243	1.7768	2.0725	8.79371e-05	0.00107474
AT5G64350_1	12.1365	5.74792	2.11146	2.3828e-18	2.37921e-16
AT5G64370_1	19.6747	8.31736	2.3655	0.00189525	0.0133729
AT5G64620_1	7.48257	3.83219	1.95256	1.07335e-08	3.38104e-07
AT5G65000_1	11.4324	3.61297	3.16426	0.00123615	0.00946698
AT5G65010_1	7.07614	3.65307	1.93704	9.64849e-05	0.00116961
AT5G65050_1	12.7157	6.19225	2.05349	0.00223368	0.0152034
AT5G65060_1	20.1906	8.19685	2.46321	0.00547544	0.0314103
AT5G65260_1	32.7938	12.7775	2.56653	0.000864993	0.00714508
AT5G65430_1	5.86978	3.75567	1.56291	4.87167e-05	0.000646948
AT5G65660_1	2.04312	1.29814	1.57389	0.006066	0.0338442
AT5G65760_1	7.92201	2.49801	3.17133	0.00328369	0.0207862
AT5G65780_7	11.6065	5.86117	1.98023	0.00157209	0.011579
AT5G65810_1	8.10561	4.17531	1.94132	0.00197513	0.0137986
AT5G65840_1	12.7021	6.1799	2.05538	2.65843e-05	0.000385896
AT5G65880_1	9.68562	1.9448	4.98026	0.000593742	0.00524117
AT5G66240_1	10.165	5.91957	1.71718	0.00795319	0.0422785
AT5G66380_1	25.7257	4.85167	5.30244	8.43479e-09	2.68897e-07
AT5G66680_1	18.708	9.82901	1.90335	6.42851e-06	0.00011154
AT5G66760_1	8.51259	5.60704	1.51819	5.62337e-06	9.85461e-05
AT5G67070_1	6.67516	2.42926	2.74781	3.48377e-10	1.44597e-08
AT5G67130_1	7.57614	3.73648	2.02762	0.0054503	0.0312831
AT5G67260_1	12.5076	4.52649	2.7632	0.00823867	0.0432745
AT5G67560_1	14.6028	8.76337	1.66635	0.00212958	0.0145981
AT5G67590_1	15.426	7.24142	2.13024	0.000127198	0.00147454

## Sheet: Col-0 vs F1CL
Peak	Enrichment		Ratio	pvalue	padj
	Col-0	F1CL
AT1G01080_2	2.7753	1.55001	1.7905	1.10313e-05	0.000567073
AT1G01080_3	9.06889	4.85181	1.86918	0.000938492	0.0244098
AT1G01610_1	5.49221	3.23304	1.69878	0.00100508	0.0257309
AT1G02475_2	6.38456	3.38743	1.88478	0.000444581	0.0135336
AT1G04790_2	3.63819	7.03172	0.517397	4.12705e-48	3.45974e-45
AT1G04800_1	3.64135	6.82546	0.533495	4.49014e-49	4.07779e-46
AT1G05140_1	5.09599	2.70784	1.88194	6.25832e-05	0.00262825
AT1G06950_3	4.00959	2.07005	1.93695	4.1566e-05	0.00181423
AT1G07110_1	11.7389	7.71545	1.52147	0.00227194	0.0491262
AT1G08200_1	12.6289	7.8514	1.60849	3.00746e-07	2.12827e-05
AT1G09750_1	4.7501	3.16011	1.50315	2.29937e-07	1.71634e-05
AT1G09750_2	3.39363	2.09709	1.61825	1.13027e-08	1.0805e-06
AT1G10950_1	2.67401	1.76764	1.51276	0.00084756	0.0225836
AT1G11310_2	3.57953	2.28759	1.56476	0.000551196	0.016034
AT1G14345_1	7.65107	4.64161	1.64836	8.55668e-08	6.95901e-06
AT1G15140_2	4.67956	3.08041	1.51913	9.72029e-07	6.30546e-05
AT1G16320_1	3.68152	1.89222	1.94561	0.00153836	0.0360539
AT1G16410_1	2.68609	1.76795	1.51933	0.00127176	0.0313567
AT1G16880_1	10.8879	5.31532	2.04841	6.21961e-19	1.50625e-16
AT1G16890_1	17.573	10.6707	1.64686	9.91848e-06	0.000519671
AT1G17290_1	4.22204	2.39602	1.76211	0.00157562	0.0365343
AT1G17440_3	6.55321	3.44256	1.90358	0.000700914	0.019625
AT1G18500_1	7.42334	3.81224	1.94724	0.000122081	0.00455628
AT1G19350_1	4.17549	1.81942	2.29496	2.54355e-10	3.07996e-08
AT1G19740_1	5.64901	3.46449	1.63055	3.1134e-06	0.000181443
AT1G19770_1	6.28064	3.68883	1.70261	0.000120127	0.00449876
AT1G19920_2	6.09598	2.91195	2.09343	2.26165e-06	0.000135426
AT1G20110_1	4.3676	2.65631	1.64423	0.00165888	0.0376635
AT1G20340_1	6.15365	3.50387	1.75624	1.33887e-160	7.29549e-157
AT1G20696_1	3.79681	2.15627	1.76082	5.98853e-05	0.00253941
AT1G21310_1	7.84078	4.88363	1.60552	1.38952e-06	8.60226e-05
AT1G21310_2	9.06787	5.05431	1.79409	4.10675e-07	2.8148e-05
AT1G22850_2	5.55915	2.71464	2.04784	2.96011e-07	2.11755e-05
AT1G23080_2	2.78858	1.44101	1.93516	0.000926933	0.0242247
AT1G23205_1	5.47114	2.88109	1.89898	0.000141742	0.00511493
AT1G26150_2	10.0478	5.34156	1.88106	1.19225e-05	0.000607157
AT1G26150_3	7.88289	4.1243	1.91133	0.00195596	0.0434135
AT1G26850_2	4.0894	1.94157	2.10623	8.36121e-06	0.00044887
AT1G28400_1	5.2299	3.34875	1.56175	0.000133864	0.00487911
AT1G31130_1	5.54178	2.85319	1.94231	3.03656e-05	0.00137885
AT1G31330_1	4.68687	2.55516	1.83427	2.19045e-98	4.77431e-95
AT1G32060_1	5.83152	3.47435	1.67845	2.30472e-43	1.67446e-40
AT1G32990_1	4.92803	2.43149	2.02676	3.69101e-18	8.38013e-16
AT1G35340_1	3.18764	1.69526	1.88033	0.00161398	0.0371531
AT1G42960_1	3.69236	2.23791	1.64991	5.80294e-08	4.86465e-06
AT1G44920_2	4.90237	2.94231	1.66616	0.000528998	0.0155391
AT1G49750_1	7.29287	4.45649	1.63646	1.02549e-26	4.06711e-24
AT1G51680_1	4.57801	2.88107	1.589	0.000632366	0.018088
AT1G54780_1	4.29938	2.59803	1.65486	1.35829e-15	2.64333e-13
AT1G54990_1	3.81096	1.87414	2.03345	0.00136778	0.0328545
AT1G55670_1	3.37288	2.14404	1.57314	2.00217e-122	7.27323e-119
AT1G55840_1	8.46342	4.72953	1.78949	0.00219493	0.0477452
AT1G56190_1	3.22205	1.83922	1.75186	1.86619e-08	1.69481e-06
AT1G57860_1	4.18687	2.25546	1.85633	0.00133406	0.032521
AT1G60870_1	3.21306	1.58065	2.03274	0.00158147	0.0365921
AT1G61740_1	5.15471	3.03604	1.69784	1.71124e-06	0.000103606
AT1G65290_1	13.2125	8.40848	1.57133	1.60123e-05	0.000782518
AT1G65720_2	3.08767	1.7993	1.71604	4.08819e-07	2.8148e-05
AT1G66430_1	4.36118	2.33341	1.86901	0.000504476	0.0149803
AT1G66430_2	13.5935	7.18149	1.89286	9.91201e-07	6.39178e-05
AT1G66970_1	9.30809	5.89986	1.57768	1.92552e-12	3.13199e-10
AT1G67730_1	6.15957	2.43616	2.5284	1.25747e-05	0.000631518
AT1G67740_1	4.8987	3.04607	1.60821	4.64636e-86	8.43934e-83
AT1G68590_1	5.80229	3.18982	1.819	9.86618e-33	5.12008e-30
AT1G69690_2	4.28109	1.93694	2.21023	0.000372236	0.0115574
AT1G74070_3	2.21119	1.39302	1.58733	0.00119127	0.0295728
AT1G75460_1	3.08537	2.01987	1.52751	1.35435e-08	1.27238e-06
AT1G75690_2	2.8443	1.80611	1.57482	9.64773e-06	0.000507927
AT1G76080_1	5.21357	3.14324	1.65866	2.97288e-07	2.11755e-05
AT1G76100_1	4.11896	2.62248	1.57063	0.000160143	0.00564801
AT1G76450_1	7.49609	4.49973	1.6659	0.000669349	0.0190459
AT1G76490_1	2.55448	1.58458	1.61209	0.000101909	0.00393192
AT1G76880_1	8.65649	3.85363	2.24632	0.00100581	0.0257309
AT1G76930_1	8.45683	4.33338	1.95155	4.69704e-05	0.00203129
AT1G77490_1	4.43764	2.5217	1.75978	1.5775e-07	1.19386e-05
AT1G79830_3	4.09537	2.43339	1.68299	6.34151e-06	0.00034904
AT2G02390_2	27.9147	12.8728	2.1685	0.00230473	0.0494488
AT2G04360_1	16.3759	9.29798	1.76123	0.000759962	0.0208616
AT2G05710_1	3.35613	2.02399	1.65817	1.07744e-06	6.82671e-05
AT2G05920_1	8.73654	4.94065	1.7683	2.81148e-05	0.00128737
AT2G11890_1	6.99974	4.104	1.70559	0.000106535	0.00407374
AT2G15290_2	4.97734	2.87692	1.73009	3.96634e-05	0.00175
AT2G17230_1	4.68821	2.374	1.97482	2.75468e-05	0.00126669
AT2G18510_1	9.78457	6.24638	1.56644	0.00127111	0.0313567
AT2G18960_1	7.28614	4.76624	1.5287	2.32093e-15	4.43746e-13
AT2G20860_1	21.0688	11.2413	1.87422	0.0016286	0.0372085
AT2G21140_1	4.60219	2.5499	1.80485	2.12655e-08	1.9153e-06
AT2G22230_1	6.10817	2.86014	2.13562	1.31814e-05	0.000658948
AT2G23090_1	12.2133	8.13826	1.50073	0.000126749	0.004655
AT2G23350_1	4.14292	2.0163	2.05471	3.26606e-07	2.29636e-05
AT2G23810_2	8.478	2.3513	3.60566	0.000312348	0.0099241
AT2G24090_1	2.03788	1.35499	1.50398	2.85644e-09	2.93674e-07
AT2G25830_2	6.26486	3.25451	1.92498	0.000890807	0.0236205
AT2G25970_2	3.85571	2.02938	1.89994	0.0015249	0.0358927
AT2G26110_1	5.60839	3.17325	1.7674	6.49306e-05	0.00270081
AT2G26540_2	4.17556	2.0426	2.04424	0.000725854	0.02004
AT2G28840_1	6.78792	4.3241	1.56979	0.000162787	0.00572274
AT2G30200_2	6.66421	3.51361	1.89668	0.000815394	0.0218363
AT2G30570_1	2.06509	1.28192	1.61093	1.52491e-26	5.53949e-24
AT2G31400_1	9.44673	5.49651	1.71868	1.02197e-05	0.000530356
AT2G31400_2	5.54031	3.3983	1.63032	1.02714e-08	9.90598e-07
AT2G31490_1	13.7898	8.1742	1.68699	0.000362223	0.0112786
AT2G31670_1	5.76229	2.9134	1.97786	2.45387e-07	1.81921e-05
AT2G31790_1	5.19362	3.17897	1.63375	0.000726353	0.02004
AT2G32480_2	5.04078	2.66012	1.89494	4.16183e-05	0.00181423
AT2G32690_1	2.2808	4.25037	0.536612	6.29396e-39	3.61008e-36
AT2G33800_3	6.92763	3.73356	1.8555	3.88226e-23	1.28209e-20
AT2G35860_1	4.02198	2.29934	1.74919	0.00164234	0.037444
AT2G35860_2	4.20194	2.15392	1.95083	1.39714e-06	8.60226e-05
AT2G35960_1	3.14397	1.89367	1.66025	0.00070937	0.0197212
AT2G36000_1	5.14361	3.00813	1.7099	6.18803e-06	0.000342321
AT2G36120_1	3.73714	5.78807	0.645662	9.44166e-06	0.000499491
AT2G37220_2	7.0541	3.92459	1.79741	4.10599e-39	2.48595e-36
AT2G38140_1	3.0064	1.78225	1.68685	3.7709e-16	7.75383e-14
AT2G38330_1	5.70068	9.12075	0.625023	0.00146212	0.0346395
AT2G39140_1	7.24436	4.42392	1.63754	0.00185152	0.041433
AT2G41410_1	5.48399	3.40547	1.61034	0.00229153	0.0494488
AT2G42610_1	7.33114	3.22729	2.27161	0.000904938	0.0237581
AT2G43090_1	4.36316	2.29966	1.89731	1.51262e-08	1.40893e-06
AT2G43100_1	4.89076	3.17522	1.54029	1.28771e-07	1.0096e-05
AT2G43150_1	7.49809	3.88099	1.93201	1.58972e-13	2.84013e-11
AT2G43800_1	7.15437	4.45851	1.60465	0.00106357	0.0270181
AT2G43970_2	3.51913	1.97459	1.78221	5.46439e-25	1.86097e-22
AT2G45470_1	4.72154	2.73388	1.72705	9.07101e-27	3.80215e-24
AT2G46505_1	4.53544	2.5186	1.80078	0.000186089	0.00629812
AT2G47590_1	4.46863	2.95391	1.51278	8.90473e-08	7.18843e-06
AT2G47730_1	3.80727	1.9393	1.96322	1.50584e-10	1.95365e-08
AT3G01500_1	3.00131	1.68221	1.78414	1.54203e-109	4.20126e-106
AT3G01500_2	7.83715	4.26282	1.83849	5.44572e-235	5.93475e-231
AT3G04550_1	4.56752	2.55115	1.79038	1.14834e-17	2.50291e-15
AT3G04560_1	11.652	5.22831	2.22864	0.000335077	0.0106153
AT3G04650_1	8.64878	3.27929	2.63739	6.82139e-05	0.00280526
AT3G04760_1	5.6413	2.94844	1.91332	0.000172368	0.00598684
AT3G05060_1	21.0207	13.9336	1.50864	9.56703e-05	0.00372362
AT3G06550_2	3.83737	1.65099	2.32429	4.77044e-07	3.22908e-05
AT3G07430_1	3.88656	2.53396	1.53379	2.48217e-05	0.00116097
AT3G08680_2	3.88913	1.97122	1.97296	0.00139663	0.0332325
AT3G10525_1	3.50654	2.19593	1.59684	8.90681e-05	0.0034916
AT3G11660_1	6.18231	3.44747	1.79329	1.1467e-07	9.05564e-06
AT3G14067_1	5.32618	3.30464	1.61173	2.31823e-08	2.05399e-06
AT3G14240_1	6.75179	3.40542	1.98266	3.25811e-05	0.00146119
AT3G14650_1	5.94869	3.31884	1.7924	0.000102659	0.00393935
AT3G15520_2	5.73314	2.6071	2.19905	0.000360472	0.0112562
AT3G15840_1	6.46175	3.8534	1.6769	1.07842e-07	8.57859e-06
AT3G16670_1	3.46725	2.21697	1.56396	8.7404e-05	0.00345119
AT3G17210_1	7.78933	4.74302	1.64227	0.000813131	0.0218363
AT3G17640_1	5.03345	3.15296	1.59642	0.00131759	0.0322058
AT3G18035_2	5.36537	2.68742	1.99647	0.000176938	0.00610211
AT3G18490_1	6.71856	3.16473	2.12295	8.5113e-18	1.89298e-15
AT3G19170_2	2.60357	1.46596	1.77602	8.54327e-05	0.00341042
AT3G20470_1	2.69511	6.42712	0.419333	5.46615e-10	6.33724e-08
AT3G20680_1	5.65113	3.17583	1.77942	0.000185896	0.00629812
AT3G20810_1	6.0574	3.64956	1.65976	0.000141047	0.00510674
AT3G22120_1	9.73842	6.11173	1.5934	1.10854e-36	6.04042e-34
AT3G22890_1	2.17497	1.44701	1.50308	0.000155183	0.00554486
AT3G22960_1	6.44304	3.38902	1.90115	1.93486e-07	1.45421e-05
AT3G23400_2	4.76456	3.05835	1.55788	3.10424e-05	0.00139793
AT3G23450_1	4.95669	9.19994	0.538774	4.31057e-66	5.21962e-63
AT3G23700_2	6.20377	3.72023	1.66758	4.59271e-06	0.000259333
AT3G24480_2	5.33618	2.67542	1.99452	1.02839e-09	1.14361e-07
AT3G24760_1	10.3611	5.02727	2.06097	0.00137607	0.0329592
AT3G25410_2	6.29614	2.64399	2.38131	0.000262488	0.00843833
AT3G25480_2	11.0511	4.75132	2.3259	2.58988e-05	0.00120104
AT3G25660_2	3.58184	2.00401	1.78733	3.00522e-06	0.00017608
AT3G25770_1	2.89651	1.70887	1.69499	7.14173e-23	2.28914e-20
AT3G26060_1	4.73446	2.50182	1.8924	5.07515e-43	3.45681e-40
AT3G26740_1	5.00072	3.02249	1.6545	2.9402e-75	4.00528e-72
AT3G27830_1	4.46008	2.72978	1.63386	3.8687e-31	1.83309e-28
AT3G27850_1	4.23632	2.66633	1.58883	1.94335e-31	9.62663e-29
AT3G27925_2	4.78519	2.3642	2.02402	1.36165e-07	1.05995e-05
AT3G28040_1	6.00696	2.87115	2.09218	1.01993e-05	0.000530356
AT3G28040_2	3.86417	1.96535	1.96615	0.00162178	0.0371679
AT3G28200_1	6.48848	3.63113	1.7869	0.00229882	0.0494488
AT3G28920_1	4.31198	2.62606	1.642	0.000787424	0.0214534
AT3G29075_1	17.7308	9.80211	1.80887	1.507e-05	0.000743133
AT3G29320_1	16.1359	8.7361	1.84703	3.03423e-08	2.62436e-06
AT3G46740_3	5.22358	2.71174	1.92629	4.67813e-07	3.18639e-05
AT3G46970_1	5.52121	3.6235	1.52372	0.0016481	0.0374968
AT3G47520_1	3.56589	2.32077	1.53651	3.85061e-05	0.0017188
AT3G47670_1	5.73712	2.62688	2.18401	0.00071999	0.0199655
AT3G48560_2	8.1796	5.13853	1.59182	2.4147e-10	2.95678e-08
AT3G50370_2	4.50575	2.12071	2.12464	0.000388164	0.0119836
AT3G51510_1	8.77141	5.33234	1.64494	7.80844e-05	0.00316343
AT3G51820_2	3.2417	1.79937	1.80158	0.000452386	0.0136947
AT3G51950_1	9.8494	5.59252	1.76117	7.1003e-08	5.81797e-06
AT3G52060_1	5.75163	3.5767	1.60808	0.000217704	0.0071678
AT3G52230_1	3.18205	1.97293	1.61285	1.49075e-07	1.1441e-05
AT3G52370_1	5.55394	2.54787	2.17984	0.000204753	0.00683743
AT3G52470_1	4.81482	2.87203	1.67645	0.00135201	0.0327427
AT3G52960_1	7.2836	4.47581	1.62733	1.67557e-13	2.89846e-11
AT3G53130_1	4.21833	1.96235	2.14963	0.00193248	0.0430679
AT3G53560_2	3.91012	2.2663	1.72533	7.07392e-05	0.00288732
AT3G53890_1	4.96923	7.99602	0.621464	0.00136869	0.0328545
AT3G54640_2	4.32755	2.52895	1.7112	0.00177681	0.0400076
AT3G54660_2	4.81194	2.7664	1.73942	0.000193344	0.00652341
AT3G54690_1	4.61455	2.13181	2.16462	0.000743041	0.0204486
AT3G54910_1	6.8495	3.50543	1.95397	1.58057e-05	0.000775903
AT3G54920_1	4.79795	3.12255	1.53655	0.000463498	0.0139536
AT3G54920_2	4.01759	1.93873	2.07228	0.000349992	0.0110237
AT3G55250_1	3.60878	2.10117	1.71751	0.000224032	0.00735273
AT3G55800_1	2.94672	1.65237	1.78333	2.43387e-65	2.65244e-62
AT3G55800_2	5.31768	2.71938	1.95548	7.96708e-31	3.47301e-28
AT3G56590_1	8.11103	4.45175	1.82199	0.000109575	0.00414636
AT3G56900_1	5.87361	3.29841	1.78074	1.52827e-08	1.41145e-06
AT3G57560_2	4.71243	2.45783	1.91731	0.000957768	0.0247928
AT3G58120_2	4.66729	2.68403	1.73891	0.00118684	0.02953
AT3G58610_1	2.7922	1.50644	1.85351	2.48318e-07	1.82849e-05
AT3G58990_1	4.58948	2.61166	1.7573	5.57697e-06	0.000311681
AT3G59410_1	5.89117	3.52182	1.67276	3.16425e-06	0.000183425
AT3G62840_1	6.79061	4.2689	1.59072	0.00107784	0.0272537
AT3G63460_2	4.75466	2.34966	2.02355	1.68863e-09	1.80418e-07
AT4G00330_1	6.08035	3.38013	1.79885	0.00231588	0.0495844
AT4G00430_1	4.61399	3.04966	1.51295	0.00230501	0.0494488
AT4G00585_1	13.5735	9.00378	1.50753	0.00069689	0.019574
AT4G00895_1	6.92802	3.8548	1.79725	1.41007e-10	1.85143e-08
AT4G01070_2	2.5096	1.40528	1.78585	0.000551728	0.016034
AT4G01150_1	4.24986	2.58333	1.64511	1.04495e-26	4.06711e-24
AT4G01883_1	13.7456	7.09033	1.93864	0.00103854	0.026506
AT4G01900_1	6.644	4.23262	1.56972	7.17638e-06	0.000393006
AT4G04020_1	6.58193	4.01513	1.63928	0.00131802	0.0322058
AT4G04770_1	3.83121	2.1548	1.77799	0.000122632	0.00456125
AT4G09010_1	8.8803	5.50352	1.61357	2.14525e-11	3.07617e-09
AT4G09040_2	6.3995	2.76638	2.31331	2.21351e-08	1.97728e-06
AT4G09670_1	13.7532	7.16888	1.91845	0.00162341	0.0371679
AT4G11010_1	17.2273	11.1688	1.54244	1.3897e-07	1.07411e-05
AT4G12290_1	4.4913	2.76866	1.62219	0.0015504	0.0361032
AT4G12730_2	4.07359	2.44997	1.66271	3.99669e-08	3.40281e-06
AT4G12830_1	12.5671	8.10722	1.55011	0.000791394	0.0215077
AT4G13340_2	8.81688	5.78181	1.52493	8.31476e-07	5.52526e-05
AT4G13830_1	8.15932	4.13686	1.97235	0.000264434	0.00847588
AT4G13840_1	2.18581	3.27598	0.667224	2.06455e-12	3.30875e-10
AT4G16140_1	4.63291	2.50363	1.85048	0.00109832	0.0275795
AT4G18670_1	7.44056	4.43608	1.67728	3.73475e-09	3.80387e-07
AT4G18760_2	10.1641	5.08729	1.99794	3.86408e-05	0.0017188
AT4G19120_1	2.75609	1.82913	1.50677	0.0022057	0.0478838
AT4G19170_1	4.91962	2.75185	1.78775	0.000258605	0.00836285
AT4G20360_1	6.27667	3.50357	1.7915	4.48117e-52	4.43962e-49
AT4G24620_2	5.2101	2.79182	1.86621	0.000183282	0.00624191
AT4G24930_2	4.44093	2.58888	1.71539	5.07217e-09	5.07124e-07
AT4G25130_2	6.32723	3.58097	1.76691	6.74337e-13	1.1306e-10
AT4G26670_1	9.12225	6.07087	1.50263	0.00168209	0.0380229
AT4G26710_1	25.1792	16.7685	1.50157	0.000457896	0.0138231
AT4G27520_1	4.84458	2.89952	1.67082	2.28297e-20	5.92376e-18
AT4G30920_3	3.77028	1.8204	2.07112	4.00561e-05	0.00176021
AT4G30993_1	6.00286	3.81297	1.57433	0.000960128	0.024795
AT4G32260_2	4.29204	2.33357	1.83926	5.55003e-83	8.64061e-80
AT4G33480_2	4.9653	2.35327	2.10996	0.00199831	0.0439952
AT4G35630_1	5.59455	2.9823	1.87592	0.000547558	0.0159981
AT4G35800_2	6.55577	3.35275	1.95534	2.28869e-10	2.83434e-08
AT4G38680_2	2.30057	4.34307	0.52971	1.23372e-20	3.36128e-18
AT4G38920_1	19.6604	12.759	1.5409	3.77941e-10	4.42882e-08
AT4G39710_2	3.5511	2.122	1.67347	0.00139653	0.0332325
AT4G39840_1	6.16353	3.60953	1.70757	1.68472e-08	1.54286e-06
AT5G03660_2	3.21679	2.11964	1.51762	9.41983e-06	0.000499491
AT5G04160_2	3.18862	1.29418	2.4638	0.00210512	0.0460674
AT5G05190_1	38.9502	19.9714	1.9503	0.0010762	0.0272537
AT5G05200_1	17.3808	9.97012	1.74329	1.65127e-06	0.000100534
AT5G06290_1	4.47391	2.19247	2.04058	6.96177e-20	1.7644e-17
AT5G06600_2	3.443	2.17066	1.58615	0.000411995	0.012618
AT5G06700_1	4.85348	2.93151	1.65562	2.74435e-06	0.000162543
AT5G08050_1	2.85772	1.81021	1.57867	0.000179578	0.00617364
AT5G08280_2	3.78584	2.40048	1.57712	2.71603e-08	2.36795e-06
AT5G08420_1	9.34105	6.02632	1.55004	4.02531e-07	2.79413e-05
AT5G09330_1	7.14219	4.11746	1.73461	8.72896e-05	0.00345119
AT5G11770_2	4.86706	3.13465	1.55266	0.000165891	0.00581311
AT5G12860_2	4.68336	2.88645	1.62253	5.70612e-16	1.15158e-13
AT5G14370_1	8.87081	5.72815	1.54863	0.000526844	0.0155177
AT5G14740_2	5.95176	3.38583	1.75784	8.22929e-19	1.94963e-16
AT5G14920_1	5.03272	3.0046	1.67501	2.48983e-18	5.77323e-16
AT5G15780_1	7.4793	4.72745	1.5821	2.22676e-10	2.78934e-08
AT5G16030_1	14.3859	9.25984	1.55358	0.000224671	0.00735273
AT5G16390_2	3.46443	1.87109	1.85155	0.000108988	0.00413852
AT5G18660_3	3.70038	2.17218	1.70354	5.55224e-05	0.0023636
AT5G19240_1	4.00111	2.30812	1.73349	1.01301e-06	6.49399e-05
AT5G19250_1	4.32446	2.58554	1.67256	1.20451e-21	3.54776e-19
AT5G19590_2	3.01387	1.85405	1.62556	8.51416e-05	0.00341042
AT5G20650_1	2.96162	1.61349	1.83553	1.09797e-05	0.000567073
AT5G21430_2	10.8094	6.64477	1.62676	0.00189381	0.0422925
AT5G27120_1	7.86558	4.86631	1.61633	2.31399e-05	0.00108698
AT5G27470_1	7.67464	14.6555	0.523668	0.00121999	0.0302169
AT5G28500_1	5.67424	3.30383	1.71747	4.90825e-12	7.13201e-10
AT5G28750_2	2.64674	1.74782	1.51431	0.00155017	0.0361032
AT5G33320_1	4.73082	2.91441	1.62325	1.33144e-05	0.000662561
AT5G35100_2	6.71656	3.98996	1.68336	8.23473e-06	0.000444268
AT5G38560_1	7.71481	4.12808	1.86886	0.00168518	0.0380229
AT5G38720_1	10.2495	1.81027	5.66186	1.11857e-06	7.04633e-05
AT5G38865_1	12.29	5.12275	2.39911	0.0015542	0.0361144
AT5G40370_1	13.2518	8.19947	1.61617	1.37252e-06	8.54727e-05
AT5G42130_2	7.02529	3.59523	1.95406	6.46028e-05	0.00269748
AT5G42270_1	6.11731	3.16233	1.93443	1.59316e-16	3.3389e-14
AT5G42765_2	5.96763	3.74459	1.59367	0.000659775	0.0188226
AT5G43750_1	10.7505	6.85611	1.56802	0.000297747	0.00948784
AT5G43760_1	9.17748	4.68661	1.95823	2.612e-10	3.12809e-08
AT5G44680_2	2.96824	1.55561	1.90808	6.27037e-05	0.00262825
AT5G45390_1	6.88582	4.10381	1.67791	2.85548e-09	2.93674e-07
AT5G45550_1	4.03501	1.62949	2.47625	5.82094e-09	5.76696e-07
AT5G46290_2	6.11638	3.37856	1.81035	2.4769e-06	0.000147504
AT5G47030_1	14.2394	9.34991	1.52294	0.00133689	0.032521
AT5G48760_1	11.3879	5.5304	2.05915	0.000359471	0.0112562
AT5G49910_1	3.95464	2.19902	1.79837	6.52665e-14	1.20555e-11
AT5G50250_2	5.13838	2.80315	1.83308	0.00218217	0.0476579
AT5G52420_1	6.12004	3.02328	2.02431	6.54963e-05	0.00271399
AT5G52780_2	3.21199	1.88997	1.69949	0.00116188	0.0290417
AT5G55730_1	5.26473	2.90928	1.80963	9.5765e-07	6.24938e-05
AT5G57180_2	6.86297	3.32418	2.06456	9.26918e-05	0.00362063
AT5G58250_1	3.96073	2.15786	1.83549	9.30637e-14	1.69035e-11
AT5G58330_2	3.1152	1.90363	1.63645	2.54722e-05	0.00118631
AT5G62220_2	5.82182	3.64972	1.59514	0.00134512	0.0326484
AT5G62350_1	6.56075	3.52483	1.86129	2.53338e-11	3.58556e-09
AT5G64280_2	4.18996	2.58816	1.6189	0.00207888	0.0455848
AT5G64290_2	5.38238	3.17388	1.69583	2.37741e-12	3.75492e-10
AT5G64620_1	7.48257	4.06437	1.84102	5.42425e-07	3.64898e-05
AT5G66380_1	25.7257	8.9824	2.86401	0.00130732	0.0320881
AT5G66760_1	9.40098	6.20152	1.51591	3.37748e-06	0.00019475
AT5G67070_1	6.67516	3.1226	2.13769	3.94323e-07	2.7547e-05

## Sheet: Col-0 vs F1LC
Peak	Enrichment		Ratio	pvalue	padj
	Col-0	F1LC
AT1G01080_2	2.7753	1.3199	2.10267	3.7518e-08	2.28578e-06
AT1G01610_1	5.49221	2.6392	2.08101	1.90144e-06	8.60138e-05
AT1G02475_2	6.38456	2.97805	2.14387	1.77121e-05	0.000632322
AT1G03130_1	5.02179	3.10291	1.61841	5.17881e-13	5.5136e-11
AT1G03600_1	5.14992	2.715	1.89684	9.51202e-24	2.33155e-21
AT1G04300_2	6.54863	2.58151	2.53674	0.00287579	0.0457177
AT1G04790_2	3.63819	6.51133	0.558748	5.98976e-44	3.00629e-41
AT1G04800_1	3.64135	6.21429	0.585963	8.81028e-42	4.03741e-39
AT1G05140_1	5.09599	2.66867	1.90956	4.6637e-05	0.00148506
AT1G06000_1	4.6083	2.85304	1.61523	3.62843e-05	0.00118401
AT1G06950_3	4.00959	2.05227	1.95373	2.3094e-05	0.000800693
AT1G07110_1	11.7389	7.75974	1.51279	0.00208484	0.0356724
AT1G07310_2	5.32779	1.95604	2.72377	0.000702402	0.0149865
AT1G08580_1	6.2372	3.87332	1.6103	0.0003396	0.00822846
AT1G09750_1	4.7501	2.41641	1.96577	3.028e-15	4.31285e-13
AT1G09750_2	3.39363	1.4331	2.36803	1.06298e-20	2.11392e-18
AT1G10830_2	3.92658	2.07202	1.89505	0.00125477	0.0232021
AT1G10960_1	3.8037	2.26459	1.67964	8.12842e-33	2.6773e-30
AT1G12330_1	4.19261	2.59884	1.61326	0.00293977	0.0463157
AT1G12650_1	8.59457	4.55605	1.88641	4.28272e-06	0.000184244
AT1G13060_1	10.9224	16.8694	0.647467	0.000554676	0.0123862
AT1G13270_1	16.0555	9.12549	1.75941	0.00029369	0.00735271
AT1G14345_1	7.65107	4.37888	1.74727	2.67441e-09	1.9307e-07
AT1G14710_2	3.85806	2.012	1.91753	0.00262457	0.0422981
AT1G14810_2	3.902	2.32096	1.6812	0.000973885	0.0192584
AT1G15130_2	4.5145	2.01965	2.23529	0.00253645	0.0413282
AT1G15140_2	4.67956	2.81913	1.65993	1.20623e-08	7.94607e-07
AT1G15710_2	3.21021	1.4287	2.24694	0.00236433	0.0392943
AT1G15810_3	3.29537	2.18732	1.50658	4.76392e-06	0.000200047
AT1G16410_1	2.68609	1.54666	1.73671	1.55429e-05	0.000568826
AT1G17290_2	7.57465	4.76253	1.59047	0.00298503	0.0468188
AT1G17440_2	6.64894	2.61174	2.54579	3.8222e-05	0.00123957
AT1G17440_3	6.90441	3.17473	2.1748	3.49642e-05	0.00114805
AT1G18500_1	7.42334	4.0055	1.85329	0.00056095	0.0124998
AT1G18720_2	2.9456	1.70589	1.72672	0.00230877	0.0386875
AT1G19350_1	4.17549	1.57694	2.64784	3.88371e-13	4.26399e-11
AT1G19740_1	5.64901	3.37501	1.67377	8.732e-07	4.32091e-05
AT1G19770_1	6.28064	3.23043	1.94421	1.45348e-06	6.86981e-05
AT1G19920_2	6.09598	2.93241	2.07883	2.33876e-06	0.000103574
AT1G19950_1	4.89552	2.52871	1.93597	0.000365474	0.00873491
AT1G20110_1	5.54795	2.63344	2.10673	6.38229e-05	0.00194984
AT1G20340_1	6.15365	3.24866	1.89421	9.42499e-203	4.96697e-199
AT1G20696_1	3.79681	2.34775	1.61721	0.00106982	0.0205493
AT1G21310_1	7.84078	4.31013	1.81915	3.14577e-07	1.67456e-05
AT1G21310_2	9.06787	4.08987	2.21715	2.54814e-09	1.8651e-07
AT1G21880_2	3.83851	1.62475	2.36252	0.000247695	0.00636758
AT1G22530_2	3.44068	2.21578	1.55281	0.000332788	0.00810843
AT1G22850_2	5.55915	2.71977	2.04398	1.15771e-06	5.54647e-05
AT1G23205_1	5.47114	2.82725	1.93514	5.31345e-05	0.00165716
AT1G24100_2	3.60229	1.8065	1.99407	0.00010837	0.00310386
AT1G26150_2	10.0478	5.05773	1.98662	3.29494e-06	0.000143507
AT1G26150_3	7.88289	4.04876	1.94699	0.00214661	0.0363751
AT1G26630_1	6.2564	3.88846	1.60897	2.53202e-17	4.2361e-15
AT1G26850_2	4.0894	1.90637	2.14513	5.04276e-06	0.000210915
AT1G28280_3	3.78338	1.96877	1.9217	0.000100241	0.0029267
AT1G28290_1	5.26684	3.37745	1.55941	0.00101186	0.0198604
AT1G28290_2	6.08246	3.57808	1.69993	4.89475e-07	2.54141e-05
AT1G28400_1	5.74482	3.13808	1.83068	8.59501e-07	4.27318e-05
AT1G29070_1	10.1636	6.73333	1.50945	6.04748e-09	4.16604e-07
AT1G29880_2	3.7191	1.99768	1.86171	0.000810966	0.0165011
AT1G29900_1	4.18129	2.27886	1.83482	0.00263308	0.0423705
AT1G30210_2	4.18375	1.88141	2.22373	0.00313913	0.0488721
AT1G30530_1	2.77796	1.65182	1.68176	0.00258677	0.0419454
AT1G31130_1	5.54178	2.69396	2.05711	4.54974e-06	0.000193145
AT1G31330_1	4.68687	2.17058	2.15927	5.8191e-140	1.53333e-136
AT1G32060_1	5.83152	3.13567	1.85974	1.21032e-63	9.112e-61
AT1G32700_2	9.15095	3.66908	2.49407	0.00298353	0.0468188
AT1G32990_1	4.92803	2.32571	2.11893	4.82498e-20	9.41764e-18
AT1G33240_2	3.12785	1.80579	1.73212	0.00251429	0.0410862
AT1G33240_4	4.84478	2.40804	2.01192	0.000421133	0.00984199
AT1G41880_2	2.21827	1.46062	1.51872	2.39297e-09	1.78879e-07
AT1G44920_2	4.90237	2.3337	2.10069	4.93438e-07	2.54943e-05
AT1G47200_2	6.29202	3.07806	2.04415	0.000306551	0.00761328
AT1G48210_1	18.9897	9.02717	2.10362	0.00104165	0.0202565
AT1G48620_2	7.09427	3.21226	2.2085	6.8611e-05	0.00207804
AT1G49600_2	4.47731	2.36603	1.89233	4.86467e-08	2.91327e-06
AT1G49750_1	7.29287	3.83333	1.90249	1.63421e-44	8.61231e-42
AT1G51680_1	4.57801	2.06258	2.21956	3.16262e-10	2.46918e-08
AT1G53230_3	2.26341	1.43143	1.58122	0.00106183	0.0205353
AT1G53240_1	12.8933	8.34078	1.54582	6.74157e-08	3.96962e-06
AT1G53510_1	8.49006	5.14945	1.64873	8.67657e-05	0.00257609
AT1G54410_1	8.07699	5.32034	1.51813	8.20324e-139	1.72924e-135
AT1G54500_1	4.6452	2.21164	2.10034	2.5271e-17	4.2361e-15
AT1G54780_1	5.19867	2.64157	1.96803	1.4869e-22	3.19835e-20
AT1G54990_1	3.81096	1.80368	2.11288	0.000982182	0.0193499
AT1G55110_2	9.1385	3.02399	3.022	0.00228473	0.0383456
AT1G55670_1	3.37288	1.91927	1.75738	5.0498e-174	1.77416e-170
AT1G56330_1	12.8846	8.33814	1.54526	2.88777e-05	0.000969334
AT1G57860_1	4.18687	2.26998	1.84445	0.00125428	0.0232021
AT1G58080_3	5.24172	2.28781	2.29115	1.10769e-05	0.000421481
AT1G59960_2	4.46436	1.52363	2.93009	1.71588e-06	7.9322e-05
AT1G60590_1	3.97726	1.89514	2.09866	0.00169836	0.0302259
AT1G60640_1	10.2626	6.44104	1.59331	7.20589e-07	3.63397e-05
AT1G60870_1	3.21306	1.37471	2.33727	0.000419275	0.00983672
AT1G60900_1	6.695	4.21951	1.58668	0.00226149	0.038016
AT1G61740_1	7.23011	3.57079	2.02479	4.37845e-08	2.65223e-06
AT1G62500_1	4.17813	2.37709	1.75767	0.00202103	0.0347498
AT1G62850_1	4.34844	2.20041	1.97619	0.00140318	0.0255436
AT1G63970_1	2.9413	1.93684	1.51861	0.000272079	0.00689355
AT1G65060_2	3.94068	1.68369	2.3405	0.000352022	0.00845927
AT1G65060_3	4.94921	2.14239	2.31014	0.000738951	0.0156119
AT1G65720_2	4.11779	1.99762	2.06135	4.01421e-09	2.82065e-07
AT1G66430_1	4.28368	2.09048	2.04913	7.64526e-05	0.00229575
AT1G66430_2	13.5935	7.60987	1.7863	1.17556e-05	0.000444102
AT1G67730_1	4.038	1.96027	2.05992	2.75945e-05	0.000935196
AT1G67740_1	5.27062	2.84676	1.85145	1.11669e-130	1.96166e-127
AT1G67840_2	2.37231	1.44281	1.64423	0.002339	0.0390076
AT1G68590_1	5.80229	2.83996	2.04309	1.46067e-46	8.55303e-44
AT1G68830_2	3.06069	1.61035	1.90064	6.13925e-06	0.000250805
AT1G69690_2	4.77561	2.00929	2.37677	0.000682766	0.0146864
AT1G71050_1	5.93325	2.48163	2.39087	0.00108943	0.0208395
AT1G71980_1	3.84961	1.76377	2.18261	0.000161309	0.00434833
AT1G72020_1	7.11249	10.6988	0.664794	2.67233e-05	0.000911532
AT1G72750_1	5.11266	2.52357	2.02597	0.00103205	0.0201069
AT1G73840_2	3.77898	1.86285	2.0286	0.000803085	0.0164966
AT1G75080_1	5.14193	1.88564	2.72689	0.000697164	0.0149049
AT1G75330_2	4.03648	2.57691	1.5664	0.000148085	0.00407132
AT1G75340_2	5.26706	2.07927	2.53313	0.00222346	0.0374365
AT1G75460_1	3.62854	2.06879	1.75395	5.26948e-12	4.95896e-10
AT1G75690_2	4.57665	1.9827	2.30829	5.85048e-11	5.01333e-09
AT1G76080_1	5.21357	2.99355	1.7416	1.12556e-07	6.44751e-06
AT1G76100_1	4.11896	2.20695	1.86636	2.15823e-07	1.17256e-05
AT1G76450_1	7.49609	4.47909	1.67357	0.000635782	0.0138453
AT1G76880_1	7.52685	3.40887	2.20802	0.00123762	0.0230469
AT1G76930_1	8.45683	4.0526	2.08677	2.45201e-05	0.00084183
AT1G76930_2	6.47287	3.00788	2.15197	0.00105572	0.0204753
AT1G77490_1	4.43764	2.31995	1.91282	1.705e-09	1.29285e-07
AT1G78020_2	3.44794	2.27665	1.51448	0.000295792	0.00738779
AT2G01100_1	4.68051	3.06001	1.52957	0.000172678	0.00461935
AT2G01290_2	5.8675	2.15806	2.71888	0.000966309	0.0191806
AT2G01680_2	10.895	4.36138	2.49806	0.000148329	0.00407132
AT2G02070_1	5.67922	2.72098	2.0872	0.00047483	0.010786
AT2G03440_1	2.99862	1.67456	1.79069	8.07428e-08	4.65043e-06
AT2G04360_1	16.3759	9.40587	1.74103	0.00149983	0.0271618
AT2G05710_1	3.90289	2.03166	1.92103	5.39049e-09	3.73788e-07
AT2G05710_2	12.0227	7.62297	1.57716	0.000938682	0.0187736
AT2G05810_2	6.75351	4.1644	1.62173	0.0015514	0.0279996
AT2G05920_1	8.73654	4.08644	2.13793	1.80459e-08	1.13894e-06
AT2G11890_1	6.99974	3.42911	2.04127	6.65894e-07	3.37429e-05
AT2G14880_2	3.54308	5.32271	0.665653	0.00021742	0.00564434
AT2G14890_1	5.80047	3.53527	1.64074	3.71615e-17	6.02589e-15
AT2G15290_2	4.97734	2.72006	1.82987	9.93098e-06	0.000384826
AT2G17230_1	6.43602	2.68652	2.39567	2.74743e-05	0.000934128
AT2G18960_1	14.6235	9.68205	1.51037	1.35015e-06	6.41018e-05
AT2G20760_2	2.69294	1.77046	1.52103	0.000105065	0.00304227
AT2G21140_1	4.60219	1.97076	2.33524	5.98061e-15	8.29416e-13
AT2G22230_1	6.10817	3.00605	2.03196	4.65271e-05	0.00148506
AT2G23090_1	12.2133	7.63812	1.59899	8.41533e-06	0.000334708
AT2G23130_1	4.38846	1.82768	2.40111	0.00237108	0.0392943
AT2G23350_1	4.14292	1.87109	2.21418	5.22396e-08	3.11077e-06
AT2G23760_2	9.26638	5.15338	1.79812	0.00074231	0.0156167
AT2G24090_1	2.03788	1.222	1.66766	2.33844e-13	2.62204e-11
AT2G24820_1	3.36684	1.82867	1.84114	1.68542e-05	0.000613261
AT2G25110_1	2.4493	1.31602	1.86115	0.000590582	0.0130772
AT2G25760_2	3.47254	1.59131	2.1822	0.00186499	0.0327616
AT2G25970_2	3.09608	1.65244	1.87364	0.00101748	0.0199336
AT2G26080_1	11.8781	6.87346	1.72811	2.15912e-08	1.35459e-06
AT2G26110_1	5.32894	2.83085	1.88246	5.23761e-06	0.000218199
AT2G28720_1	12.732	8.33213	1.52806	5.49296e-06	0.00022723
AT2G28840_1	6.78792	4.09792	1.65643	8.56749e-05	0.00255811
AT2G29210_1	6.96371	3.58081	1.94473	0.000303142	0.00755347
AT2G30200_2	6.66421	3.26979	2.03811	0.000159741	0.0043171
AT2G31400_1	9.44673	5.53128	1.70788	7.20018e-05	0.00216828
AT2G31400_2	5.54031	2.75733	2.00931	2.89025e-15	4.17305e-13
AT2G31490_1	13.7898	8.02124	1.71916	0.000349215	0.00844202
AT2G31670_1	5.76229	2.59337	2.22193	2.3845e-09	1.78879e-07
AT2G31790_1	5.19362	2.48961	2.08612	1.9344e-07	1.07308e-05
AT2G32480_2	5.04078	2.79845	1.80128	0.00018492	0.00488486
AT2G33800_3	6.6854	3.53964	1.88872	1.25778e-26	3.31424e-24
AT2G35860_1	4.02198	1.86807	2.15301	1.93215e-05	0.0006811
AT2G35860_2	4.20194	2.02213	2.07797	1.33591e-07	7.56934e-06
AT2G35960_1	3.14397	1.5579	2.01807	3.66019e-06	0.000158108
AT2G36000_1	6.71827	3.02493	2.22097	3.82915e-09	2.70867e-07
AT2G36120_1	3.54832	5.41808	0.654903	2.94584e-05	0.000985688
AT2G36160_1	9.45622	5.38992	1.75443	1.08401e-05	0.000413967
AT2G36570_1	5.81109	2.56686	2.26389	0.00246706	0.040566
AT2G37220_2	7.0541	3.99641	1.76511	9.87264e-37	3.46859e-34
AT2G37470_1	2.83296	1.68628	1.68	0.000488957	0.0110356
AT2G38140_1	3.0064	1.51842	1.97995	7.5123e-26	1.88523e-23
AT2G38330_1	5.70068	9.12721	0.624581	0.00109505	0.0209091
AT2G39020_1	5.57901	3.12617	1.78461	0.00165848	0.0296278
AT2G39140_1	7.24436	3.97464	1.82264	0.000616523	0.0135378
AT2G40060_1	3.49157	2.17295	1.60683	7.4286e-14	9.05861e-12
AT2G40060_2	9.35115	6.10202	1.53247	0.00152979	0.0276569
AT2G40070_2	4.40717	1.84526	2.38838	0.000707744	0.0150565
AT2G40660_1	3.11533	1.90521	1.63517	0.000151002	0.00413393
AT2G41410_1	5.48399	3.12717	1.75366	0.00021808	0.00564758
AT2G41680_2	5.15823	2.44283	2.11158	4.76203e-06	0.000200047
AT2G42610_1	7.33114	3.19118	2.29731	0.00158453	0.0285
AT2G42880_2	5.0189	2.86805	1.74994	2.44334e-05	0.000841596
AT2G42975_1	3.94478	1.6388	2.40711	0.000147535	0.00407074
AT2G43090_1	4.36316	2.06405	2.11388	3.42842e-11	3.0366e-09
AT2G43100_1	5.4594	2.77743	1.96563	2.62755e-16	4.0727e-14
AT2G43150_1	7.49809	3.98363	1.88223	7.87594e-11	6.64099e-09
AT2G43160_1	3.55714	2.19495	1.6206	1.97077e-05	0.000692396
AT2G43970_2	4.15302	1.94856	2.13132	2.14125e-34	7.28026e-32
AT2G45470_1	4.72154	2.34383	2.01446	1.93858e-41	8.17307e-39
AT2G46505_1	4.53544	2.13274	2.12658	4.5629e-06	0.000193145
AT2G47590_1	4.46863	2.62212	1.70421	8.39465e-12	7.69388e-10
AT2G47710_1	11.3292	6.65276	1.70294	0.000692232	0.0148597
AT2G47730_1	3.80727	1.76059	2.1625	6.13623e-14	7.6995e-12
AT3G01500_1	3.91516	2.12477	1.84262	9.0377e-78	9.52573e-75
AT3G01500_2	7.83715	4.33381	1.80837	8.34424e-227	8.79483e-223
AT3G01560_1	8.75444	3.30221	2.65108	0.000419974	0.00983672
AT3G02180_1	2.18987	1.42287	1.53906	0.000115934	0.00330255
AT3G02640_1	6.85015	2.80036	2.44617	9.74312e-05	0.00285487
AT3G04550_1	4.56752	2.36429	1.93188	6.06868e-22	1.25419e-19
AT3G04760_1	5.6413	2.87682	1.96095	4.00444e-05	0.00129469
AT3G06035_1	3.51493	2.184	1.6094	0.000548907	0.0122834
AT3G06400_2	3.84311	2.45739	1.5639	0.000999711	0.0196585
AT3G06550_2	3.83737	1.49121	2.57333	4.63875e-09	3.23791e-07
AT3G07100_2	3.28492	1.36124	2.41318	0.000173335	0.0046252
AT3G07430_1	4.94528	2.58924	1.90993	2.74501e-08	1.70191e-06
AT3G10525_1	3.50654	1.97485	1.7756	1.69324e-06	7.862e-05
AT3G10670_2	5.12451	2.81504	1.82041	0.000810906	0.0165011
AT3G10720_2	5.43823	3.07522	1.7684	0.00320379	0.0497675
AT3G11660_1	6.18231	2.77635	2.22677	3.37632e-12	3.26481e-10
AT3G11830_1	5.4706	9.07075	0.603103	0.00256434	0.04171
AT3G12780_2	3.23659	1.9365	1.67136	5.22225e-38	2.03861e-35
AT3G13110_1	5.12451	2.79519	1.83333	0.000739121	0.0156119
AT3G13460_2	2.3117	1.52777	1.51312	1.37118e-07	7.68737e-06
AT3G14067_1	5.32618	2.70854	1.96644	3.78668e-14	4.98895e-12
AT3G14240_1	6.75179	3.26305	2.06917	2.77244e-05	0.000936588
AT3G15520_2	5.73314	2.41796	2.37106	6.18643e-05	0.00190658
AT3G15840_1	6.46175	4.22285	1.53019	3.07724e-05	0.00101674
AT3G16140_1	9.84966	6.51762	1.51124	2.24698e-14	3.0363e-12
AT3G16520_2	4.60999	2.57373	1.79117	0.000835954	0.0169442
AT3G17210_1	7.78933	4.50491	1.72907	0.000207485	0.0054131
AT3G17640_1	5.03345	3.03198	1.66012	0.000941551	0.0187954
AT3G18035_2	5.36537	2.18086	2.46021	1.199e-06	5.71832e-05
AT3G18050_1	3.25496	1.83603	1.77282	9.75096e-05	0.00285487
AT3G18490_1	6.71856	2.90644	2.31161	1.89746e-22	3.99985e-20
AT3G18680_1	2.96931	1.68964	1.75736	0.000463076	0.0105417
AT3G19170_2	2.60357	1.3324	1.95404	1.10404e-06	5.33789e-05
AT3G19860_1	2.61616	1.39139	1.88024	0.00125111	0.0232021
AT3G20470_1	2.1704	3.76306	0.576765	2.10685e-07	1.15058e-05
AT3G20680_1	5.65113	2.79222	2.02388	8.59731e-06	0.000339385
AT3G20810_1	6.0574	3.03152	1.99814	8.09679e-07	4.04456e-05
AT3G21055_1	3.31777	2.20163	1.50696	3.2356e-32	1.03343e-29
AT3G21690_1	3.77656	1.774	2.12885	0.000172016	0.00461335
AT3G22110_1	5.64727	3.76167	1.50127	0.00170057	0.0302259
AT3G22120_1	9.73842	5.46728	1.78122	2.04756e-46	1.13585e-43
AT3G22960_1	6.44304	3.25112	1.98179	7.77718e-08	4.50393e-06
AT3G23400_2	4.76456	2.78321	1.71189	3.13021e-07	1.67456e-05
AT3G23450_1	4.95669	7.988	0.620518	1.90429e-50	1.18066e-47
AT3G23700_2	6.20377	3.38651	1.8319	7.12786e-08	4.17376e-06
AT3G23940_1	8.13984	4.61996	1.76189	0.00155922	0.0280926
AT3G24480_2	7.27369	2.98841	2.43397	9.16182e-11	7.60359e-09
AT3G24770_1	3.17938	1.63039	1.95007	0.00114443	0.0217732
AT3G25410_2	6.29614	2.53721	2.48152	0.000129535	0.00364079
AT3G25480_2	11.0511	4.318	2.55931	2.19601e-06	9.78765e-05
AT3G25660_2	4.36111	2.01298	2.1665	1.59439e-08	1.03098e-06
AT3G25770_1	2.89651	1.47581	1.96266	1.93798e-37	7.04356e-35
AT3G26060_1	4.73446	2.5267	1.87377	2.78905e-42	1.33621e-39
AT3G26740_1	5.00072	2.70963	1.84553	1.79691e-97	2.70564e-94
AT3G27830_1	5.97288	2.59598	2.30082	2.78523e-67	2.44636e-64
AT3G27850_1	4.23888	2.19368	1.93232	9.1096e-63	6.40101e-60
AT3G27925_2	3.83124	2.25652	1.69786	1.74064e-05	0.000626154
AT3G28200_1	6.48848	3.30793	1.96149	0.000455094	0.0104276
AT3G28720_1	9.54535	4.3511	2.19378	0.00127044	0.0234099
AT3G29075_1	17.7308	9.41454	1.88334	1.15378e-06	5.54647e-05
AT3G29320_1	16.1359	10.4475	1.54447	7.88244e-05	0.00236025
AT3G43590_2	9.34099	3.95768	2.36022	0.000780925	0.0162027
AT3G44620_1	3.05947	1.52407	2.00744	0.000515948	0.0116079
AT3G44880_1	4.60935	2.09084	2.20455	0.0025742	0.041806
AT3G45160_1	2.54233	1.3277	1.91484	5.34284e-05	0.00166117
AT3G46550_1	2.91526	1.52692	1.90925	0.000152791	0.00417207
AT3G46550_2	6.49932	4.05988	1.60087	0.00138717	0.0253833
AT3G46970_1	5.52121	3.46275	1.59446	0.000830946	0.0168751
AT3G47520_1	3.56589	1.93793	1.84005	3.39379e-10	2.63019e-08
AT3G48460_1	8.51541	2.70348	3.14979	0.000978838	0.0193201
AT3G48560_2	8.1796	4.25677	1.92155	6.39515e-18	1.16215e-15
AT3G49220_1	4.00464	2.26136	1.7709	0.000106271	0.00306874
AT3G49720_1	5.5839	3.52433	1.58439	0.000352336	0.00845927
AT3G50370_2	4.50575	1.70188	2.64751	1.7102e-05	0.000619434
AT3G51510_1	8.77141	5.67339	1.54606	0.00079248	0.0163681
AT3G51670_1	6.51305	3.3916	1.92035	0.00237824	0.0393511
AT3G51820_2	3.2417	1.58902	2.04007	2.2283e-05	0.000775123
AT3G52060_1	6.31232	3.46387	1.82233	5.21071e-05	0.00163455
AT3G52150_1	6.12358	3.85576	1.58816	0.00232262	0.0387963
AT3G52230_1	3.18205	1.94017	1.64009	5.69919e-08	3.37469e-06
AT3G52380_1	3.6221	2.3958	1.51186	4.79462e-15	6.73804e-13
AT3G52470_1	5.22021	2.57835	2.02464	1.73714e-05	0.000626154
AT3G52500_1	6.01036	3.89253	1.54407	8.75932e-06	0.000343209
AT3G52960_1	7.2836	3.75873	1.93778	9.6763e-23	2.14654e-20
AT3G53460_2	5.52167	2.9483	1.87283	3.96132e-29	1.15979e-26
AT3G53560_2	3.91012	2.12057	1.8439	1.43536e-05	0.000527394
AT3G54640_2	4.32755	2.51868	1.71818	0.00217579	0.0368102
AT3G54660_2	4.81194	2.73315	1.76058	0.000133306	0.00372691
AT3G54690_1	4.61455	1.91464	2.41014	0.000107926	0.00309958
AT3G54910_1	7.03285	3.21048	2.19059	2.19365e-06	9.78765e-05
AT3G54920_1	4.79795	2.74277	1.74931	1.19737e-05	0.000449121
AT3G54920_2	4.01759	1.41347	2.84237	1.07037e-06	5.19896e-05
AT3G56040_3	5.24337	2.29088	2.2888	0.000917472	0.0183945
AT3G56590_1	8.62501	4.01323	2.14914	3.35569e-06	0.000145551
AT3G56900_1	5.92102	3.66829	1.61411	7.42995e-06	0.000300045
AT3G57560_2	4.95976	2.09128	2.37164	2.31915e-05	0.000801437
AT3G58120_2	4.66729	1.8454	2.52915	4.00817e-07	2.11231e-05
AT3G58990_1	4.58948	1.92209	2.38775	1.24669e-12	1.25144e-10
AT3G59410_1	7.41336	3.74305	1.98057	6.44904e-09	4.41382e-07
AT3G59540_1	8.22698	12.5203	0.657092	0.00015764	0.00428228
AT3G60630_1	4.56631	2.04433	2.23365	0.00107036	0.0205493
AT3G61240_1	14.2019	24.5243	0.579096	0.000946127	0.018851
AT3G61770_1	5.25728	2.06788	2.54235	0.000624209	0.0136215
AT3G61820_1	3.97928	2.3247	1.71174	3.03636e-05	0.00100639
AT3G61870_1	4.33909	2.50072	1.73513	2.84605e-18	5.2627e-16
AT3G62120_2	5.80294	3.68213	1.57597	0.000807547	0.0164966
AT3G62700_3	5.35988	2.79852	1.91526	0.00253694	0.0413282
AT4G00895_1	6.92802	3.61892	1.91439	3.17925e-13	3.52729e-11
AT4G01883_1	13.7456	7.12559	1.92905	0.000807615	0.0164966
AT4G02770_1	3.60564	2.19494	1.64271	1.96713e-76	1.88487e-73
AT4G04020_1	6.58193	4.01291	1.64019	0.00140563	0.0255436
AT4G05160_2	17.7709	8.0046	2.22009	0.00259724	0.0420506
AT4G08950_1	4.61439	2.16713	2.12926	0.00197676	0.0342681
AT4G09040_2	6.3995	2.75394	2.32376	3.24053e-08	1.98577e-06
AT4G09730_1	7.45673	2.67659	2.7859	0.000479486	0.010845
AT4G09730_2	3.37376	2.17941	1.54802	0.000574337	0.0127711
AT4G10840_1	6.12465	3.61571	1.6939	0.000423272	0.0098701
AT4G11010_1	17.2273	10.1237	1.70168	5.82106e-11	5.01333e-09
AT4G12310_2	4.29819	2.14257	2.00609	0.000256472	0.00654532
AT4G13340_2	8.39058	4.54945	1.84431	9.29626e-13	9.60614e-11
AT4G13830_1	8.15402	4.24148	1.92245	0.00126527	0.0233554
AT4G14220_2	3.06028	1.4841	2.06205	0.000763095	0.0159584
AT4G14510_2	4.10534	1.78327	2.30214	0.000179677	0.00477028
AT4G16380_2	3.09516	1.79319	1.72607	9.0878e-05	0.00268306
AT4G17100_2	3.00568	1.91151	1.57241	1.52782e-06	7.18895e-05
AT4G17870_1	3.84833	2.05026	1.87699	0.00115583	0.0218403
AT4G18670_1	7.44056	3.76368	1.97694	6.68482e-13	6.97604e-11
AT4G18760_1	5.22176	2.40333	2.17272	0.00306435	0.0478493
AT4G18760_2	10.1641	4.5817	2.21842	3.1753e-06	0.00013887
AT4G19110_1	14.5081	9.57276	1.51556	0.00191397	0.0334855
AT4G19170_1	5.69223	3.30199	1.72388	0.00271293	0.0435888
AT4G20360_1	6.27667	3.43268	1.8285	1.58418e-58	1.04358e-55
AT4G20830_1	6.26136	3.07766	2.03446	0.000100601	0.00292911
AT4G23170_1	3.27798	2.09449	1.56505	0.00277772	0.0444942
AT4G23600_1	3.07831	1.4838	2.07461	6.34377e-13	6.68633e-11
AT4G23670_1	2.33416	1.53446	1.52116	2.00151e-30	6.04421e-28
AT4G23800_2	4.90718	3.18102	1.54264	5.72501e-06	0.00023571
AT4G24620_2	5.2101	2.4967	2.08679	9.42441e-06	0.000366543
AT4G24930_2	4.44093	2.3778	1.86766	2.14555e-12	2.13341e-10
AT4G25100_1	5.39896	3.1745	1.70073	5.0282e-13	5.40788e-11
AT4G25130_2	6.32723	3.60433	1.75545	4.0464e-12	3.84226e-10
AT4G25890_1	4.87988	3.02538	1.61298	0.00209798	0.0358391
AT4G27520_1	4.47671	2.21451	2.02154	4.17441e-41	1.69224e-38
AT4G27990_1	4.37382	2.73413	1.59971	0.0023685	0.0392943
AT4G28300_1	4.72987	2.47308	1.91254	3.29641e-05	0.00108576
AT4G29670_1	15.331	9.6619	1.58674	0.000804929	0.0164966
AT4G29670_2	2.04583	1.33115	1.53689	0.000747246	0.0156892
AT4G30920_3	3.77028	2.09846	1.79669	0.00137163	0.0251425
AT4G30993_1	6.00286	3.67285	1.63439	0.000260816	0.00663401
AT4G32260_2	3.9374	2.09039	1.88357	3.16524e-96	3.70685e-93
AT4G32530_2	3.22431	2.02371	1.59327	0.00165055	0.0295362
AT4G32551_1	5.93557	2.6923	2.20465	0.000184017	0.00487321
AT4G32760_1	4.0981	1.93509	2.11778	3.35478e-07	1.77685e-05
AT4G33480_2	4.9653	2.07516	2.39273	0.000372606	0.00886517
AT4G33865_1	4.40971	6.74542	0.653734	1.77837e-05	0.000632322
AT4G33980_1	9.19838	6.0099	1.53054	0.000717312	0.0152122
AT4G34150_1	6.20704	3.59749	1.72538	0.000107555	0.00309735
AT4G34200_2	3.81848	2.06416	1.8499	0.00147624	0.0267807
AT4G34950_1	3.05013	1.74493	1.748	3.37225e-09	2.40159e-07
AT4G35800_2	7.31492	3.15281	2.32012	1.11281e-12	1.13874e-10
AT4G36130_1	3.87933	7.29248	0.531963	4.08481e-05	0.00131262
AT4G36140_1	4.60397	8.64503	0.532557	0.000159601	0.0043171
AT4G36220_1	3.71659	1.85347	2.00521	0.00193947	0.0337884
AT4G36390_2	3.48883	1.89593	1.84017	0.00128723	0.0236778
AT4G36870_2	4.81601	2.20496	2.18417	0.00305154	0.0477908
AT4G37450_1	3.09017	1.94596	1.58799	0.000436964	0.01007
AT4G37820_2	5.91838	3.8294	1.54551	0.0013925	0.0254366
AT4G38550_1	4.29872	2.29344	1.87435	3.13774e-10	2.46804e-08
AT4G39680_2	4.36692	2.27983	1.91546	0.00213244	0.0362565
AT4G39710_2	3.5511	1.90785	1.86131	0.00012606	0.00356214
AT4G39840_1	6.16353	3.2029	1.92436	1.2336e-12	1.25021e-10
AT4G39960_1	3.0482	1.86014	1.63869	3.0138e-05	0.00100206
AT5G01750_1	5.86194	3.87076	1.51442	1.19074e-05	0.000448229
AT5G01750_2	6.44462	3.66672	1.7576	0.000460448	0.0105046
AT5G02130_1	9.74552	5.66793	1.71942	0.00122236	0.0228434
AT5G03660_2	3.21679	1.80435	1.7828	3.11061e-09	2.23033e-07
AT5G05200_1	17.3808	9.88744	1.75787	2.20083e-06	9.78765e-05
AT5G06290_1	4.47391	1.98673	2.2519	1.17896e-23	2.82414e-21
AT5G06600_2	3.71717	2.00219	1.85656	1.98969e-06	8.96212e-05
AT5G06700_1	5.54281	2.64117	2.09862	2.4627e-11	2.19974e-09
AT5G08280_2	3.78584	1.94769	1.94375	9.55522e-16	1.43874e-13
AT5G08410_1	2.64326	4.97712	0.531082	5.58608e-07	2.85812e-05
AT5G08420_1	9.36077	5.61251	1.66784	2.49336e-09	1.85071e-07
AT5G08540_1	4.93967	1.93477	2.5531	7.08524e-06	0.000287225
AT5G09590_2	4.93572	2.3929	2.06265	0.000375957	0.00892475
AT5G09620_1	3.33181	1.37718	2.41929	6.11984e-06	0.000250805
AT5G09620_2	3.94407	1.96677	2.00536	8.32686e-06	0.000332444
AT5G10430_1	4.79508	2.70618	1.7719	0.00033868	0.00822509
AT5G11060_1	4.66257	2.6568	1.75496	1.86069e-06	8.45331e-05
AT5G11770_2	4.86706	2.22279	2.18962	1.84183e-10	1.4933e-08
AT5G11840_2	4.37389	1.88193	2.32415	0.0006088	0.0134242
AT5G11880_2	4.47429	2.1387	2.09206	0.000174143	0.00463502
AT5G12230_2	11.864	6.14018	1.93219	0.000772743	0.0160645
AT5G12860_2	4.68336	2.78906	1.67919	9.67544e-17	1.54514e-14
AT5G13120_2	3.72654	2.05237	1.81572	5.49749e-06	0.00022723
AT5G13510_1	3.47929	1.89204	1.83891	7.67994e-18	1.37198e-15
AT5G14040_2	3.35906	1.63704	2.0519	1.27159e-13	1.5059e-11
AT5G14370_1	8.87081	5.09784	1.74011	8.71527e-06	0.000342757
AT5G14540_2	6.23367	3.20789	1.94323	2.823e-05	0.000950619
AT5G14740_2	5.95176	3.13875	1.89622	1.32636e-23	3.10663e-21
AT5G14920_1	5.03272	2.50653	2.00785	1.42548e-27	3.85245e-25
AT5G15780_1	7.4793	4.44679	1.68196	3.0311e-12	2.95813e-10
AT5G16220_2	4.85798	2.11631	2.2955	0.00122807	0.0229094
AT5G16390_2	3.46443	1.54229	2.24629	1.06771e-06	5.19896e-05
AT5G18660_3	3.70038	1.97802	1.87075	5.26115e-07	2.705e-05
AT5G19090_2	3.81238	2.17397	1.75365	0.000238227	0.00613915
AT5G19240_1	4.00111	2.0212	1.97958	8.52689e-11	7.13281e-09
AT5G19250_1	4.03877	2.04822	1.97185	1.19409e-37	4.49488e-35
AT5G19590_2	3.96047	2.00879	1.97157	1.76949e-06	8.10887e-05
AT5G20070_1	4.64373	2.24947	2.06436	0.00119686	0.0224464
AT5G21430_2	10.8094	6.11541	1.76757	0.000141556	0.00393342
AT5G23070_1	5.30004	2.6113	2.02966	0.00115107	0.0218207
AT5G23760_1	7.55492	11.3994	0.662745	0.000111789	0.0031931
AT5G25060_1	9.96032	5.93776	1.67746	0.000425332	0.00989624
AT5G25220_1	5.91863	3.39831	1.74164	0.000883774	0.0177767
AT5G25220_2	3.45706	2.13218	1.62137	2.14768e-05	0.000749553
AT5G26742_3	3.45374	1.98264	1.74199	6.75407e-10	5.15854e-08
AT5G27120_1	7.86558	5.16687	1.52231	5.31422e-05	0.00165716
AT5G27470_1	7.67464	15.3115	0.501235	0.000223082	0.00576295
AT5G27700_1	11.4071	17.3247	0.658433	1.48656e-08	9.73191e-07
AT5G27770_1	7.92488	12.1215	0.653786	7.74899e-06	0.000311734
AT5G28300_3	6.59013	4.35036	1.51485	0.00168983	0.0301367
AT5G28500_1	5.67424	2.93939	1.93041	1.03954e-17	1.82613e-15
AT5G33320_1	4.73082	2.55653	1.85048	3.17989e-08	1.96e-06
AT5G35100_2	6.71656	3.45557	1.94369	1.55565e-08	1.01213e-06
AT5G36120_1	3.16018	1.92055	1.64546	0.000659518	0.0142445
AT5G36790_1	20.9594	1.78961	11.7117	8.68709e-15	1.18912e-12
AT5G38560_1	7.71481	3.69609	2.08729	0.000433952	0.0100304
AT5G39760_1	6.77363	3.40483	1.98942	0.00243348	0.0401391
AT5G41685_1	4.12332	2.16418	1.90526	0.000596443	0.0131793
AT5G42050_1	6.13044	3.98643	1.53783	0.0028244	0.0450472
AT5G42070_1	5.80541	3.40832	1.70331	0.000350348	0.00845005
AT5G42100_2	4.08006	1.6791	2.42991	6.57219e-12	6.07639e-10
AT5G42100_3	4.85875	2.6684	1.82085	0.000123522	0.00349979
AT5G42130_2	7.01559	3.44342	2.03739	1.68734e-05	0.000613261
AT5G42270_1	6.11731	2.95646	2.06913	4.74255e-19	8.92616e-17
AT5G42750_1	6.02832	3.36846	1.78964	0.000917978	0.0183945
AT5G42765_2	5.96763	3.63872	1.64003	0.00051652	0.0116079
AT5G43280_1	5.26252	2.09854	2.50771	0.00289107	0.045758
AT5G43750_1	10.7505	6.58916	1.63155	4.02835e-05	0.00129844
AT5G43760_1	9.17748	4.43504	2.06931	2.91699e-12	2.87337e-10
AT5G44130_1	4.29395	2.33515	1.83883	3.75432e-12	3.59732e-10
AT5G45390_1	8.25543	4.13246	1.9977	6.82203e-14	8.45932e-12
AT5G45550_1	4.03501	1.93567	2.08456	8.4825e-06	0.000336111
AT5G46290_2	6.11638	3.10574	1.96938	1.20032e-07	6.83857e-06
AT5G47210_3	4.06545	2.21831	1.83268	3.52799e-10	2.71423e-08
AT5G48385_1	3.6817	1.94384	1.89403	0.00199551	0.0344234
AT5G49910_1	3.95464	1.90478	2.07617	1.11664e-21	2.26334e-19
AT5G49910_2	3.38762	1.96085	1.72763	1.30948e-41	5.75078e-39
AT5G50250_2	5.13838	2.58312	1.98922	0.000431059	0.00998542
AT5G50915_2	4.20644	2.40315	1.75039	8.25957e-06	0.000331011
AT5G52420_1	6.12004	2.68511	2.27925	3.04229e-06	0.000133607
AT5G52440_1	3.62587	2.0478	1.77062	0.00105679	0.0204753
AT5G52780_2	3.21199	1.74714	1.83842	0.000369106	0.00880176
AT5G52810_1	3.48188	1.45063	2.40026	0.00116693	0.0219633
AT5G54310_1	7.95161	4.90858	1.61994	0.0029452	0.046332
AT5G54630_2	6.37702	2.92452	2.18054	0.00178138	0.0314502
AT5G55730_1	5.26473	2.58457	2.03699	2.5113e-09	1.85098e-07
AT5G56280_1	4.74179	2.38061	1.99184	0.000655913	0.0141957
AT5G56890_2	7.3065	3.22525	2.26541	1.82625e-06	8.33275e-05
AT5G56890_3	5.11342	1.99126	2.56793	0.000141812	0.00393342
AT5G57180_2	6.86297	3.20421	2.14186	5.0863e-05	0.0016099
AT5G57345_2	4.4188	1.78457	2.47611	0.000254246	0.00650426
AT5G58250_1	3.96073	1.76516	2.24383	8.39822e-23	1.92429e-20
AT5G58310_1	8.70189	4.77204	1.82352	0.000769145	0.0160213
AT5G58330_2	3.1152	1.77562	1.75443	1.76032e-06	8.10207e-05
AT5G61770_1	15.4364	8.06667	1.9136	0.00282506	0.0450472
AT5G62140_2	5.96145	3.0966	1.92516	1.21043e-05	0.000452408
AT5G62220_2	5.77268	3.0477	1.89411	1.00244e-05	0.000387021
AT5G62350_1	6.56075	3.13221	2.09461	2.50718e-14	3.34502e-12
AT5G64280_2	4.91291	2.32514	2.11296	6.21585e-05	0.00191006
AT5G64290_2	5.38238	2.97233	1.81083	6.06306e-14	7.69936e-12
AT5G64620_1	7.48257	3.84552	1.94579	1.66612e-08	1.0643e-06
AT5G65930_3	3.44683	1.71059	2.01499	0.00305686	0.0478031
AT5G66120_2	5.30545	2.96074	1.79194	0.00113873	0.0217038
AT5G66380_1	25.7257	9.45973	2.7195	0.00275011	0.0441189
AT5G67070_1	6.67516	3.14125	2.125	7.65738e-07	3.84328e-05
AT5G67385_1	4.49527	2.56314	1.75382	3.12833e-07	1.67456e-05

## Sheet: Ler vs F1CL
Peak	Enrichment		Ratio	pvalue	padj
	Ler	F1CL
AT1G01080_2	3.09141	1.55001	1.99444	1.3287e-07	1.01241e-05
AT1G01820_1	6.47571	13.9767	0.463322	0.0011473	0.0202937
AT1G02130_1	6.09342	10.8932	0.559376	0.00121288	0.0211787
AT1G04270_1	7.98488	12.8738	0.620243	9.62098e-08	7.7652e-06
AT1G04410_1	5.02655	8.00442	0.627972	8.87216e-17	3.86684e-14
AT1G04750_1	11.2949	19.6177	0.575748	8.2837e-05	0.00257884
AT1G04940_1	3.31934	5.40527	0.614093	0.00324117	0.0447602
AT1G06430_1	5.29604	9.55555	0.554237	0.00100734	0.0182629
AT1G06950_1	8.00491	12.0171	0.666129	0.00171994	0.0275425
AT1G07110_1	4.93405	7.71545	0.639503	0.000416358	0.00937321
AT1G07140_2	4.92258	3.27007	1.50535	2.56997e-12	6.66725e-10
AT1G07420_1	9.00152	15.482	0.581419	0.0029132	0.0412236
AT1G07770_1	3.99193	6.53589	0.61077	4.4432e-11	8.20561e-09
AT1G07890_1	3.42124	5.85415	0.584413	2.78776e-17	1.3807e-14
AT1G08200_1	4.5686	7.8514	0.581883	9.31682e-08	7.63279e-06
AT1G08360_1	5.77703	10.081	0.573058	1.50473e-14	5.65365e-12
AT1G08370_2	3.55867	7.08891	0.502005	0.00323147	0.0447373
AT1G09640_1	3.03955	5.8695	0.517855	1.08928e-07	8.53869e-06
AT1G09690_1	3.22876	5.33244	0.605494	6.80533e-11	1.15861e-08
AT1G10290_3	8.69652	16.7586	0.51893	0.000956196	0.0174518
AT1G10470_1	2.72333	4.64925	0.585757	0.00070766	0.0139939
AT1G10590_1	4.82213	7.68271	0.62766	0.00361338	0.0483866
AT1G10630_1	6.54018	10.0567	0.650331	0.00281014	0.0400252
AT1G11650_1	8.66191	16.2658	0.532522	1.12229e-11	2.40939e-09
AT1G11890_1	6.57054	12.8925	0.509639	0.000723159	0.014248
AT1G12840_2	9.87396	15.0945	0.654142	2.6051e-05	0.000985597
AT1G13060_1	8.13061	12.5783	0.6464	0.000380971	0.00873906
AT1G13270_1	7.4259	12.2104	0.608164	0.00121825	0.0212384
AT1G14400_1	5.27687	11.5248	0.457871	8.49195e-12	2.01148e-09
AT1G15140_1	5.56778	9.35776	0.594991	1.96084e-06	0.000109566
AT1G16180_1	3.21301	4.92136	0.65287	0.000521267	0.0111367
AT1G16210_2	3.30068	2.02042	1.63366	0.000624451	0.0128373
AT1G16720_2	4.2008	6.65004	0.631695	0.0021547	0.0328818
AT1G16880_1	3.55503	5.31532	0.668827	1.0006e-06	6.19465e-05
AT1G16890_1	6.29506	10.4472	0.602557	0.000191789	0.00506177
AT1G17290_2	2.45928	4.87837	0.50412	3.23695e-07	2.24649e-05
AT1G18080_1	4.74604	7.14334	0.664401	1.2876e-06	7.62483e-05
AT1G19910_1	3.73946	6.27966	0.595487	0.000245172	0.00614113
AT1G21350_1	2.21189	3.88023	0.570041	3.49677e-05	0.00126162
AT1G22530_1	2.19099	3.9554	0.553924	0.00256242	0.0373263
AT1G22840_1	8.94592	15.2112	0.588115	3.38199e-05	0.00122834
AT1G27090_1	2.60153	4.57447	0.568707	0.00258444	0.0375724
AT1G27530_1	10.0243	17.7589	0.564466	0.0020272	0.0312866
AT1G28140_1	5.68319	9.06289	0.627083	8.90958e-06	0.000391447
AT1G30630_1	4.41269	6.63957	0.664605	0.00166737	0.0268356
AT1G31810_2	21.5473	4.29843	5.01283	1.10015e-15	4.61048e-13
AT1G32200_2	3.47838	6.93855	0.501313	6.2789e-05	0.0020545
AT1G32210_1	7.26327	13.7906	0.526684	4.63613e-05	0.0015904
AT1G32500_1	8.09287	12.7658	0.633952	0.0028893	0.0409387
AT1G33120_1	7.61314	11.5587	0.65865	4.01511e-09	4.65412e-07
AT1G34430_1	8.83213	17.6226	0.501181	0.000137989	0.00389514
AT1G35160_1	7.45124	13.7727	0.541014	1.22637e-06	7.34204e-05
AT1G36980_1	7.21967	13.206	0.546698	5.83981e-07	3.92781e-05
AT1G45474_1	5.62197	8.59959	0.653749	7.24837e-06	0.00032236
AT1G48210_1	5.06077	9.85143	0.51371	0.00172393	0.0275425
AT1G48830_1	4.87729	7.39236	0.659774	0.000216992	0.0055371
AT1G49140_1	2.61043	4.36281	0.598336	0.00038299	0.00876693
AT1G49300_1	8.01998	15.1047	0.530958	0.000477155	0.0103982
AT1G50200_1	4.17634	7.2816	0.573547	1.24328e-05	0.000521031
AT1G50320_1	4.99102	8.07247	0.618277	8.68797e-07	5.50373e-05
AT1G50430_1	13.0442	20.2723	0.643451	0.00221625	0.0336327
AT1G51390_1	2.58275	5.80428	0.444973	0.0020688	0.0317936
AT1G51610_2	3.62484	6.39149	0.567136	0.000290025	0.00699139
AT1G51730_2	3.73734	2.36794	1.57831	0.000811426	0.0155218
AT1G51980_1	7.77386	12.7484	0.609791	1.62327e-05	0.00065508
AT1G52510_1	7.18515	11.5615	0.621472	0.000390624	0.00892294
AT1G52590_1	4.61769	8.27966	0.557715	5.96039e-05	0.001974
AT1G52740_1	8.73082	14.1425	0.617345	0.000193341	0.00507626
AT1G54080_1	4.68116	7.7108	0.607092	9.4363e-05	0.00287438
AT1G54580_1	6.87442	10.3649	0.663243	8.8998e-06	0.000391447
AT1G54630_1	5.54991	8.30321	0.668406	1.99621e-06	0.000110973
AT1G56050_1	8.26128	17.4371	0.473776	0.00264986	0.038293
AT1G56070_1	4.87396	8.33552	0.584722	1.46509e-20	1.77374e-17
AT1G56300_2	3.01312	4.91252	0.613356	0.000632871	0.0129134
AT1G56450_1	7.80184	12.8574	0.606797	0.00136972	0.0231746
AT1G56500_1	4.09505	9.37781	0.436674	3.27717e-05	0.00119825
AT1G57870_1	2.54656	6.24159	0.407999	5.93794e-06	0.000273468
AT1G58080_1	4.67726	8.84714	0.528675	0.000121585	0.00352337
AT1G59610_2	6.88362	15.0156	0.458432	0.000147242	0.00409273
AT1G61790_1	2.42299	7.2793	0.33286	0.000168406	0.00462357
AT1G63610_1	7.17441	11.8786	0.603978	0.0027325	0.0393307
AT1G63770_1	10.0036	17.3852	0.575408	1.39938e-06	8.06754e-05
AT1G64850_1	5.58882	11.596	0.481961	0.000320446	0.00757598
AT1G65430_1	8.13753	19.2963	0.421715	0.00365863	0.0487937
AT1G66670_1	7.09504	11.9796	0.592258	2.6217e-08	2.55054e-06
AT1G69740_1	8.35712	12.5454	0.666151	4.2229e-08	3.85966e-06
AT1G69830_1	12.2138	20.8232	0.586551	0.000177594	0.0048136
AT1G70410_1	5.38701	9.49119	0.56758	4.64883e-08	4.15194e-06
AT1G70490_1	6.72845	12.2724	0.548259	1.07373e-10	1.74617e-08
AT1G70600_1	3.62201	5.71138	0.634174	0.000206419	0.00534237
AT1G72370_1	5.92972	8.96735	0.661256	2.41971e-13	6.7603e-11
AT1G73060_1	8.95155	14.7553	0.606667	7.81114e-08	6.49696e-06
AT1G73530_1	9.75877	17.0875	0.571106	0.000356013	0.00825343
AT1G74900_1	9.77622	16.8614	0.5798	0.00175176	0.0279461
AT1G74910_1	5.33176	8.83457	0.603511	3.94819e-05	0.00140129
AT1G75380_1	2.47444	4.31946	0.572858	1.5003e-05	0.000609973
AT1G75690_1	5.02835	7.97396	0.630596	1.35117e-06	7.8729e-05
AT1G77940_1	2.97434	4.98862	0.596226	8.54473e-07	5.44464e-05
AT1G78140_1	3.95683	7.98879	0.495298	0.00129803	0.022273
AT1G78915_1	9.95655	14.9838	0.664489	0.00317342	0.0440479
AT1G79530_1	4.5443	16.0311	0.283468	0.000740731	0.0145162
AT1G79600_1	8.94907	14.4903	0.61759	0.00048011	0.0104417
AT1G79750_1	6.71168	10.9196	0.614645	3.77625e-06	0.000192271
AT1G80480_1	9.46238	14.2721	0.662997	1.48368e-05	0.000605474
AT1G80560_1	6.18987	10.0416	0.616425	0.00230982	0.0346663
AT2G01110_1	7.816	13.2006	0.592093	8.72454e-08	7.20171e-06
AT2G02760_1	5.01101	8.1144	0.617546	2.06258e-08	2.06183e-06
AT2G05220_1	2.97916	5.51245	0.540441	1.24931e-13	3.78125e-11
AT2G05380_1	4.44688	2.53194	1.75631	4.63295e-06	0.000221406
AT2G14045_1	3.22016	8.55772	0.376287	6.68552e-05	0.00215519
AT2G14910_1	5.65876	8.76787	0.645398	5.48556e-05	0.00185049
AT2G15290_1	10.8473	16.9423	0.640251	0.00250233	0.0366963
AT2G17560_1	4.43435	6.79898	0.652207	3.00152e-05	0.0011124
AT2G18040_2	9.1314	13.8303	0.660246	0.00142507	0.0238519
AT2G19520_2	10.372	16.5231	0.627727	0.00305524	0.0428379
AT2G19680_1	4.57105	7.64039	0.598274	0.00273919	0.039375
AT2G20230_1	12.3169	20.3468	0.605346	0.000437491	0.00973732
AT2G20360_1	8.81076	13.3795	0.658526	0.00370072	0.0491745
AT2G20420_1	4.78245	7.4555	0.641466	2.97429e-06	0.000155807
AT2G20570_1	4.90239	9.64309	0.508384	0.000117427	0.00343948
AT2G20690_2	4.69709	7.54655	0.622415	0.00312582	0.0436011
AT2G20860_1	6.68888	11.2413	0.595025	0.0030346	0.0426095
AT2G21250_1	4.60689	6.99742	0.658369	0.000946768	0.0173566
AT2G21580_1	3.30539	5.12037	0.645537	0.000188002	0.00502077
AT2G21960_1	6.97663	10.5172	0.663352	0.00138173	0.0233055
AT2G22230_2	5.86596	11.2013	0.523687	6.1469e-05	0.00202346
AT2G23080_1	7.81441	15.0309	0.519889	4.42533e-05	0.00153562
AT2G23090_1	5.25054	8.13826	0.645167	4.28485e-06	0.000207742
AT2G23930_1	14.5011	22.1668	0.654178	0.00118627	0.0208814
AT2G25080_1	6.11233	9.17588	0.66613	0.000864399	0.016295
AT2G25910_1	6.41112	10.7575	0.595968	0.000212489	0.00546055
AT2G27350_1	5.52244	12.0995	0.456418	0.000784254	0.0151511
AT2G27530_1	4.57886	7.5796	0.604103	1.00607e-11	2.30626e-09
AT2G27600_1	4.0558	6.22613	0.651417	0.000458646	0.0101004
AT2G27680_1	5.80838	8.96781	0.647692	0.000100535	0.0030177
AT2G28000_1	4.90052	7.34786	0.666931	1.86127e-06	0.000104538
AT2G29360_1	2.15716	4.1488	0.519949	0.00164512	0.0267142
AT2G29390_1	5.08586	8.03713	0.632795	0.00305873	0.0428379
AT2G29650_1	5.63962	10.027	0.56244	0.000858945	0.0162202
AT2G31560_1	3.96025	2.17705	1.81909	1.07424e-05	0.000460823
AT2G31610_1	6.106	9.63988	0.63341	1.03396e-10	1.73323e-08
AT2G33040_1	8.73787	15.2591	0.572634	3.46144e-14	1.21664e-11
AT2G33150_1	3.53345	6.10222	0.579044	4.28801e-11	8.05554e-09
AT2G33220_1	4.3251	9.44886	0.457737	1.2184e-09	1.63898e-07
AT2G34860_1	8.22583	12.8247	0.641404	8.48294e-06	0.000375732
AT2G35050_1	9.43984	15.1106	0.624718	0.00262017	0.037961
AT2G35635_2	3.83408	8.66148	0.442658	4.27124e-06	0.000207742
AT2G36250_1	7.07839	10.9723	0.645116	0.00104363	0.0188268
AT2G36390_1	6.28377	9.4878	0.6623	0.00185459	0.0291497
AT2G36530_1	7.3953	12.2106	0.605648	1.03321e-11	2.30626e-09
AT2G37270_1	6.72255	11.1634	0.602198	0.000525909	0.0112139
AT2G37470_1	3.18746	2.03461	1.56662	0.000280837	0.00685004
AT2G37500_1	8.04146	14.5802	0.551533	0.00328906	0.0451925
AT2G37540_1	3.64998	7.05763	0.517168	0.000468404	0.0102484
AT2G39190_1	8.80349	13.9275	0.632096	0.00187993	0.0294729
AT2G39900_1	5.79463	11.1289	0.520685	0.000146601	0.00409273
AT2G40840_1	3.53086	7.13441	0.494905	5.78323e-10	8.18365e-08
AT2G41420_1	4.90421	7.82931	0.626391	0.000460664	0.0101197
AT2G41840_1	4.98691	7.50577	0.664411	1.18381e-09	1.61235e-07
AT2G42130_1	6.65917	10.6858	0.623177	0.00197664	0.0306365
AT2G42220_1	2.48981	3.778	0.659031	3.68919e-08	3.49542e-06
AT2G42590_1	9.55954	14.6963	0.650471	1.99611e-07	1.44037e-05
AT2G43160_2	9.8442	16.2297	0.606555	0.000226087	0.0057423
AT2G43460_1	4.42959	7.55246	0.586509	1.5571e-07	1.17008e-05
AT2G43560_1	4.88804	7.5426	0.648057	2.84169e-06	0.00014958
AT2G43810_1	5.23189	9.80619	0.533529	0.00213386	0.0326094
AT2G43945_1	6.6156	14.0433	0.471085	0.000190572	0.00505224
AT2G44100_1	12.378	22.3797	0.553092	6.2431e-06	0.000284622
AT2G44610_1	8.63018	15.3153	0.5635	1.32689e-05	0.000547642
AT2G44620_1	7.7103	13.2788	0.580647	7.45624e-05	0.0023686
AT2G45660_1	7.64387	12.9182	0.591715	0.000199707	0.00520575
AT2G46100_1	3.98154	6.31987	0.630004	0.000376974	0.00866564
AT2G46170_1	4.90448	8.33814	0.588198	0.00162924	0.0264959
AT2G46280_1	5.34728	9.32245	0.573592	0.000126097	0.00360332
AT2G46540_1	6.1454	9.41056	0.653032	0.00213322	0.0326094
AT2G47170_1	5.01118	9.95913	0.503174	2.54118e-20	2.32177e-17
AT2G47210_1	6.26369	12.1993	0.513446	0.00181301	0.0286714
AT2G47510_1	4.99516	8.5016	0.587556	0.000404743	0.0091306
AT3G01130_1	5.46535	9.30015	0.587662	5.41644e-05	0.00183284
AT3G01510_1	3.55246	5.42741	0.65454	0.000604752	0.0125512
AT3G01910_1	8.10495	14.1805	0.571557	0.000102503	0.00306832
AT3G02080_1	6.36457	9.8518	0.646031	2.63068e-05	0.00099183
AT3G02090_1	5.69449	10.1622	0.560361	9.59871e-08	7.7652e-06
AT3G02900_1	5.72074	13.4605	0.425003	0.000668768	0.013395
AT3G03070_1	7.20435	12.8762	0.55951	2.87074e-05	0.00107122
AT3G04240_1	9.94349	17.8683	0.556489	0.00021184	0.00545689
AT3G04400_1	3.47268	5.95911	0.582751	4.34128e-20	3.63866e-17
AT3G04560_1	2.97105	5.22831	0.568262	0.00330441	0.0452933
AT3G04840_1	9.99291	16.1624	0.618281	9.24691e-09	1.0281e-06
AT3G05560_1	3.84716	6.42348	0.598921	0.000189589	0.00503845
AT3G06483_1	5.09563	10.6482	0.478544	2.79981e-12	7.09458e-10
AT3G07480_1	5.84295	10.3154	0.566428	3.01717e-06	0.000157297
AT3G08530_1	7.37373	14.0201	0.525938	0.00129498	0.0222556
AT3G08610_1	7.36306	11.3705	0.647559	9.5996e-09	1.04597e-06
AT3G08650_1	7.33334	11.9271	0.614846	0.00226975	0.0342063
AT3G09740_1	12.6935	21.735	0.58401	8.38211e-05	0.00259572
AT3G09860_1	8.40827	14.4869	0.580405	8.38559e-05	0.00259572
AT3G10130_3	6.02117	12.1841	0.49418	0.000682252	0.0135902
AT3G11510_1	3.57256	5.67209	0.62985	3.59812e-09	4.2156e-07
AT3G11780_1	7.21154	13.403	0.538055	0.00119837	0.0210264
AT3G12260_1	7.81151	12.7514	0.612601	4.15874e-05	0.00145236
AT3G12290_1	4.17326	8.61161	0.484608	4.30048e-05	0.00149706
AT3G13410_1	8.3557	14.2028	0.588312	1.04522e-08	1.1276e-06
AT3G13920_1	4.46257	7.08996	0.629421	2.34086e-10	3.49397e-08
AT3G13930_1	9.8615	14.8582	0.66371	0.00229983	0.0345641
AT3G14600_1	5.44361	8.44585	0.644531	0.00200673	0.0310586
AT3G15580_1	6.31121	10.7459	0.587314	0.00147379	0.024432
AT3G15730_1	6.86669	10.2775	0.668128	6.12871e-05	0.00202346
AT3G16140_1	3.7453	6.78819	0.551737	2.02797e-39	1.10484e-35
AT3G16270_1	3.52172	7.39906	0.475969	0.00143161	0.0239245
AT3G16640_1	3.49146	5.25758	0.664081	7.92131e-19	5.39441e-16
AT3G17410_1	7.48346	14.1762	0.527888	0.000855875	0.0162185
AT3G18740_1	4.24591	6.75701	0.628371	1.28187e-09	1.70332e-07
AT3G20800_1	5.405	10.7571	0.502459	0.00361478	0.0483866
AT3G21865_1	8.74185	16.602	0.526554	0.000632872	0.0129134
AT3G23400_1	3.80566	6.5609	0.580051	1.27061e-07	9.81887e-06
AT3G23700_1	7.30991	12.6757	0.576688	2.00633e-10	3.07901e-08
AT3G24430_1	3.71468	5.60684	0.662526	1.1037e-05	0.000471604
AT3G25040_1	9.62474	17.2764	0.557104	0.000490312	0.0105686
AT3G27430_1	8.13191	12.4065	0.655458	0.000560386	0.0118104
AT3G27740_1	7.18258	12.136	0.591839	5.72855e-06	0.00026789
AT3G28710_1	7.93826	14.288	0.555589	1.531e-06	8.77988e-05
AT3G28900_1	4.05901	6.80421	0.596544	3.70749e-06	0.000189656
AT3G28950_1	2.53706	6.44406	0.393705	1.37921e-06	7.99356e-05
AT3G29320_1	5.19582	8.7361	0.594753	4.11014e-08	3.8277e-06
AT3G42050_1	13.3756	21.1226	0.633236	3.44854e-09	4.08427e-07
AT3G43810_2	6.02287	9.23396	0.652252	5.52659e-05	0.00185857
AT3G44010_1	1.61409	3.97647	0.40591	4.83787e-11	8.78557e-09
AT3G44340_1	5.5716	15.1617	0.367479	0.000287038	0.00695015
AT3G44750_1	4.10839	8.18144	0.50216	0.0006168	0.0127045
AT3G46430_2	4.13144	6.67586	0.618862	0.000173827	0.00473505
AT3G46630_1	6.62837	11.6817	0.567417	0.000458856	0.0101004
AT3G47810_1	2.96394	5.43534	0.545309	0.00259192	0.0376053
AT3G48000_1	6.16421	10.4004	0.592688	0.00148604	0.024432
AT3G48140_1	7.8353	11.7101	0.669109	1.18271e-08	1.26341e-06
AT3G49430_1	10.1793	18.7298	0.543481	0.000513226	0.011
AT3G49870_1	3.21848	5.90882	0.54469	0.00244558	0.0361561
AT3G51370_1	2.69584	1.74316	1.54653	4.49833e-05	0.00155107
AT3G51870_1	7.38654	12.8671	0.574062	0.000301043	0.00720915
AT3G52090_1	5.78858	9.50034	0.609302	0.00178429	0.028382
AT3G52730_1	6.96317	10.4737	0.664827	0.000395286	0.00899172
AT3G52750_1	5.08891	8.94358	0.569002	0.00201463	0.0311367
AT3G52990_1	6.77186	12.4998	0.541757	2.23185e-07	1.58943e-05
AT3G53020_1	4.73819	8.60082	0.5509	6.44676e-07	4.28317e-05
AT3G53430_1	4.27467	6.81483	0.62726	0.000717179	0.0141565
AT3G53500_1	11.7807	18.499	0.636828	0.00197308	0.0306249
AT3G53580_1	11.4509	19.4101	0.589947	6.81714e-05	0.00217845
AT3G53740_1	3.80795	5.83954	0.652097	8.3516e-18	4.78942e-15
AT3G53870_1	8.62132	13.1278	0.656723	2.74298e-06	0.000145793
AT3G55330_1	3.63802	5.68875	0.639511	2.10452e-06	0.000115808
AT3G55460_1	10.9343	18.8822	0.579078	0.000188534	0.00502266
AT3G55750_2	4.65723	8.72519	0.533768	1.06749e-06	6.53448e-05
AT3G56090_1	5.32661	12.5634	0.423979	7.4937e-08	6.32957e-06
AT3G56190_1	9.48067	14.8333	0.639146	8.88962e-05	0.00272849
AT3G57290_1	8.13773	12.59	0.646364	0.00296926	0.0419598
AT3G58500_1	7.63283	13.9405	0.54753	1.2768e-05	0.000530994
AT3G59300_2	8.43324	12.7502	0.661421	0.00242709	0.0359315
AT3G59310_1	6.59159	9.84306	0.669669	0.00130661	0.0223148
AT3G59540_1	5.73232	10.8524	0.528206	4.65454e-09	5.33851e-07
AT3G59820_3	4.86152	2.47058	1.96776	0.00298208	0.0420346
AT3G60600_1	4.07909	7.81027	0.522273	0.000422024	0.00946167
AT3G60770_1	6.66939	10.4544	0.637952	1.40425e-09	1.82152e-07
AT3G60810_1	16.7134	28.8491	0.579339	0.00152237	0.024832
AT3G60820_1	13.5736	23.2759	0.583162	0.000284484	0.00690365
AT3G61240_2	9.50746	18.7118	0.508099	3.97187e-05	0.00140512
AT3G61470_1	5.12259	7.91514	0.647188	6.31034e-25	1.71894e-21
AT3G61870_2	7.08682	11.2837	0.628057	1.69535e-05	0.000679136
AT3G62030_1	7.76189	12.3666	0.627651	4.66018e-39	1.69258e-35
AT3G62790_1	6.96023	12.5966	0.55255	0.000156649	0.0043321
AT3G63520_1	8.57309	13.9826	0.613123	1.34631e-06	7.8729e-05
AT3G63540_2	3.0162	1.85439	1.62652	3.91296e-10	5.60995e-08
AT4G00585_1	4.91515	8.75621	0.561334	8.20961e-05	0.00256309
AT4G00810_1	4.96932	7.48542	0.663867	0.000661965	0.0133077
AT4G00860_1	5.14111	8.02272	0.640819	4.92192e-08	4.32494e-06
AT4G01100_1	7.83572	14.7322	0.531878	0.00108665	0.0194739
AT4G01690_1	5.55961	9.43438	0.589293	2.74085e-06	0.000145793
AT4G02080_1	8.11119	14.6283	0.554488	0.00210998	0.0323352
AT4G02260_2	7.68438	14.6623	0.524092	0.00314383	0.0436981
AT4G02570_1	8.05938	13.7481	0.586216	0.000889081	0.0166451
AT4G02580_1	10.2879	16.2758	0.632101	0.000250101	0.00625023
AT4G02610_1	10.3799	20.8049	0.498914	0.00223805	0.0338691
AT4G02620_1	3.99269	6.52059	0.612321	7.78397e-07	5.07869e-05
AT4G03520_1	4.45929	6.69998	0.665568	2.30854e-17	1.1978e-14
AT4G04320_1	5.62431	12.0704	0.465959	9.55124e-09	1.04597e-06
AT4G04330_1	5.29109	11.5928	0.45641	1.67091e-09	2.14192e-07
AT4G04340_1	4.32329	8.97469	0.48172	3.55293e-06	0.000182607
AT4G04470_1	7.20937	13.277	0.542995	0.00239203	0.0355806
AT4G05090_1	3.80669	7.13318	0.53366	0.00241376	0.0357827
AT4G08520_1	8.71155	14.5158	0.600144	4.46328e-05	0.00154387
AT4G09000_1	4.8421	8.5153	0.568635	1.50099e-24	3.27095e-21
AT4G09010_1	3.21321	5.50352	0.583846	5.86542e-17	2.6629e-14
AT4G09020_1	5.0576	8.76265	0.577177	9.4441e-05	0.00287438
AT4G10080_1	4.93293	7.46645	0.66068	0.000746432	0.0145755
AT4G10920_1	5.1185	8.88096	0.576345	0.00019186	0.00506177
AT4G11010_1	4.27329	11.1688	0.382608	7.38743e-23	1.34156e-19
AT4G11150_2	8.63568	14.984	0.576328	1.11493e-06	6.78673e-05
AT4G11600_1	4.42081	8.59642	0.514262	1.06881e-10	1.74617e-08
AT4G12600_1	7.0742	10.6449	0.664561	0.00164877	0.0267336
AT4G12720_1	3.4719	8.54026	0.406533	5.89099e-05	0.00196226
AT4G12790_1	3.67608	6.63491	0.554052	0.000493298	0.0106015
AT4G13590_1	9.65573	15.4179	0.626266	0.000858021	0.0162202
AT4G14210_1	7.43734	12.6116	0.589721	0.000139485	0.00391708
AT4G14710_1	6.75732	10.383	0.650803	0.00280813	0.0400252
AT4G16390_2	3.51236	6.74362	0.520843	0.00282827	0.0402309
AT4G16720_1	4.18016	7.37149	0.567072	2.55702e-20	2.32177e-17
AT4G16830_2	3.59624	9.74855	0.3689	2.5418e-06	0.000137106
AT4G17270_1	6.64436	13.561	0.489959	0.00271058	0.0390668
AT4G17370_1	4.23879	7.64437	0.554498	0.000538696	0.0114195
AT4G21110_1	9.32706	20.11	0.463803	0.000276141	0.00676141
AT4G21150_1	10.3226	21.8258	0.472954	0.0019277	0.0300489
AT4G21210_1	4.37021	6.60258	0.661894	1.96344e-05	0.000764057
AT4G21790_1	6.02832	9.37078	0.64331	0.00150464	0.0246288
AT4G23470_1	4.87463	8.87527	0.549237	2.76645e-08	2.66755e-06
AT4G24750_1	7.59756	11.4318	0.664597	0.0014812	0.024432
AT4G25050_1	4.38785	7.18281	0.610882	1.11776e-21	1.52238e-18
AT4G25080_3	3.3832	5.94825	0.568773	1.37522e-07	1.04059e-05
AT4G25100_1	2.06009	3.62006	0.569078	1.67718e-10	2.61065e-08
AT4G25570_1	4.67448	7.70722	0.606506	0.000168462	0.00462357
AT4G25740_1	3.0508	4.64839	0.656313	3.08653e-05	0.00113235
AT4G26300_1	11.3287	22.8277	0.49627	0.00133744	0.0227175
AT4G26370_1	4.09012	7.01438	0.583105	2.43616e-05	0.00092489
AT4G26510_3	8.98003	17.379	0.516718	0.00239359	0.0355806
AT4G26555_1	5.34372	8.61118	0.620556	3.87677e-05	0.00138043
AT4G26670_1	3.34236	6.07087	0.550557	7.10768e-08	6.05041e-06
AT4G26710_1	9.56839	16.7666	0.570682	5.54558e-08	4.79561e-06
AT4G26870_1	5.47809	9.85936	0.555623	0.00195144	0.0303755
AT4G27000_1	7.849	12.3131	0.63745	0.000326299	0.00766682
AT4G27130_1	7.64978	12.6374	0.605328	2.27033e-05	0.000867983
AT4G27500_4	7.57466	11.7472	0.644805	0.00179025	0.0283939
AT4G27800_1	11.2589	19.5346	0.576355	2.1997e-06	0.00011984
AT4G27820_1	8.84776	17.2536	0.512806	0.000830288	0.0158161
AT4G28030_1	4.2081	6.6032	0.637282	0.0034995	0.0470748
AT4G28060_1	4.06765	6.08202	0.668799	0.000267897	0.00658918
AT4G29350_2	4.91679	7.65467	0.642325	9.69529e-08	7.76764e-06
AT4G29900_1	10.9531	19.4219	0.563952	0.00335012	0.0458004
AT4G30210_3	4.05882	6.82074	0.595071	0.000881013	0.0165224
AT4G30310_1	5.78145	11.3615	0.508864	0.00249426	0.0366273
AT4G30600_1	6.14449	12.0791	0.508688	0.00237619	0.0355196
AT4G30950_1	7.52706	12.7977	0.58816	3.47665e-11	6.76456e-09
AT4G31040_1	7.16836	11.5216	0.62217	0.0012593	0.0217591
AT4G31990_1	7.68005	13.2165	0.581095	4.62615e-08	4.15194e-06
AT4G32520_1	7.92009	12.8841	0.614716	0.00245754	0.0362091
AT4G32530_1	6.01681	9.52679	0.631567	0.00012533	0.00359368
AT4G33090_1	7.61504	12.5828	0.605194	0.000726872	0.0142703
AT4G33250_1	8.37522	12.6092	0.664212	0.00108958	0.0194944
AT4G33520_1	8.75376	15.2346	0.574597	0.00130414	0.0223076
AT4G34090_1	6.82082	10.9838	0.620991	0.00208831	0.0320482
AT4G34350_1	5.03148	8.42588	0.597146	0.00216093	0.0329308
AT4G34450_2	5.26713	9.14812	0.575761	4.30889e-06	0.000207742
AT4G35250_1	9.3364	14.7121	0.634608	0.00335811	0.0458521
AT4G35360_1	3.65631	7.66501	0.477012	0.000588611	0.0122461
AT4G35790_1	7.03222	12.3221	0.570701	0.00103389	0.0186821
AT4G35830_1	6.92526	11.4987	0.602264	3.41978e-10	4.96826e-08
AT4G36760_1	6.53724	12.8541	0.508571	0.000446756	0.00989402
AT4G36800_1	6.96966	10.8655	0.641448	0.000230274	0.00582149
AT4G38510_1	7.35615	14.6856	0.500908	3.43763e-05	0.0012444
AT4G38790_1	5.93337	13.9589	0.425059	0.00136494	0.0231297
AT4G38920_1	7.84169	12.759	0.614599	9.24429e-15	3.59735e-12
AT4G39080_1	11.9041	17.9646	0.662643	1.75269e-05	0.000694448
AT4G39710_1	5.37706	8.23236	0.653162	0.000894482	0.0167175
AT5G01350_1	6.22671	11.8433	0.525758	5.78939e-06	0.000269578
AT5G01750_3	2.30878	4.00188	0.576923	4.08528e-05	0.00143491
AT5G02500_1	2.57697	1.42085	1.81368	2.02308e-84	2.20434e-80
AT5G02610_1	2.55874	4.33799	0.589844	0.00140602	0.023642
AT5G02770_1	3.4617	6.83919	0.506156	0.000847773	0.0160929
AT5G02790_1	9.63898	14.7263	0.654544	0.000123037	0.00355601
AT5G03300_1	6.85214	10.5673	0.648428	0.00013262	0.00376311
AT5G03460_1	9.52278	15.2341	0.625095	0.00169669	0.027227
AT5G03880_1	10.1455	17.5607	0.57774	2.07145e-10	3.13479e-08
AT5G04740_1	6.05201	11.0771	0.546353	4.04844e-06	0.000201597
AT5G04920_1	4.5531	8.89239	0.512022	0.0015054	0.0246288
AT5G05010_1	10.2484	15.5748	0.658015	0.000121087	0.0035183
AT5G05190_1	9.29058	19.9714	0.465193	1.63915e-05	0.000659049
AT5G05200_1	6.15828	9.97012	0.617674	6.72386e-06	0.000303997
AT5G05740_1	5.07312	8.18236	0.620007	0.000579029	0.0121563
AT5G05780_1	4.33188	14.6245	0.296207	1.76338e-06	0.000100072
AT5G08060_1	7.34251	11.8357	0.620367	0.000111683	0.00331579
AT5G08180_1	6.88954	12.0939	0.569671	0.00147543	0.024432
AT5G08270_1	6.6655	12.4141	0.536928	8.99374e-06	0.000393558
AT5G08530_1	5.02362	7.83773	0.640953	0.00113665	0.0201381
AT5G10360_1	5.26326	8.35408	0.630022	2.64873e-09	3.24276e-07
AT5G10780_1	8.2738	13.2249	0.625624	0.000214279	0.00549362
AT5G11170_1	6.36162	11.3193	0.562013	2.02983e-05	0.000787083
AT5G11200_1	7.63232	14.9155	0.511702	8.75822e-07	5.51616e-05
AT5G11330_1	4.12364	7.50672	0.549326	0.00348501	0.0469958
AT5G11520_1	3.84702	5.85321	0.657251	0.00283421	0.0402627
AT5G11880_1	7.57994	14.212	0.53335	0.000112955	0.00333538
AT5G12140_1	5.04024	7.72491	0.652466	7.11789e-05	0.00226774
AT5G12370_1	2.89235	4.90148	0.590098	0.000103088	0.0030774
AT5G12470_1	11.6593	20.7303	0.562429	0.000630644	0.0129134
AT5G13030_3	8.06008	13.8234	0.583077	0.00343651	0.0466886
AT5G13560_3	3.90363	1.78863	2.18248	5.23886e-05	0.00177827
AT5G13630_1	3.49298	6.28958	0.55536	7.20016e-19	5.2302e-16
AT5G14040_1	3.34728	5.23011	0.640002	3.26048e-06	0.00016837
AT5G14060_1	3.2643	6.87672	0.474689	0.00347017	0.0469702
AT5G14270_1	8.25332	14.9841	0.550807	0.000437894	0.00973732
AT5G15320_1	9.86017	16.4017	0.601166	0.000744196	0.0145579
AT5G15650_1	3.5941	5.70653	0.629822	0.00203221	0.0313013
AT5G16400_1	6.29328	10.3177	0.609952	0.00051386	0.011
AT5G16440_1	9.41985	15.0013	0.627936	0.00367612	0.0489072
AT5G17020_1	6.68952	12.4084	0.539113	0.0026234	0.037961
AT5G17560_1	6.50442	11.5678	0.562287	2.70451e-05	0.00101615
AT5G19140_1	3.59925	5.91063	0.608945	5.47855e-12	1.35669e-09
AT5G19370_1	3.44508	6.33006	0.544241	0.00112244	0.0199839
AT5G19940_1	2.49821	3.84676	0.649431	0.00113465	0.0201354
AT5G20140_1	7.74178	13.0957	0.59117	0.00144182	0.0240583
AT5G20280_1	7.86344	13.7318	0.572643	1.23544e-06	7.35595e-05
AT5G20570_1	6.41982	12.5402	0.511941	0.000125329	0.00359368
AT5G20920_2	2.39203	1.56707	1.52644	3.83283e-05	0.00136926
AT5G21090_1	7.87254	15.0777	0.52213	1.39461e-10	2.23466e-08
AT5G21430_2	4.04798	6.63604	0.609999	0.000949331	0.0173566
AT5G22830_2	8.9357	14.2895	0.625335	0.00297292	0.0419598
AT5G22840_1	10.6202	16.9969	0.624832	0.00326814	0.0450185
AT5G23040_1	7.46865	12.8635	0.580607	0.000324986	0.0076646
AT5G23540_1	8.14206	14.0423	0.579822	0.00112945	0.0200758
AT5G24490_2	6.73305	11.179	0.602296	2.58662e-07	1.83012e-05
AT5G25080_1	6.77038	12.5638	0.53888	0.00333694	0.0456775
AT5G26360_1	10.1491	16.4455	0.617135	0.00105328	0.0189694
AT5G26570_3	4.62904	8.14942	0.56802	0.000255048	0.00634475
AT5G26830_1	4.58436	8.12368	0.564321	0.00347559	0.0469852
AT5G27290_1	5.28846	10.1444	0.521319	0.00130203	0.0223065
AT5G27430_1	6.73057	13.7385	0.489907	0.00115893	0.0204332
AT5G27770_1	5.53221	8.97276	0.616556	1.69498e-07	1.26497e-05
AT5G33320_2	7.0238	11.1083	0.632303	1.27408e-05	0.000530994
AT5G35220_1	4.02447	6.01595	0.668967	0.00127678	0.0220124
AT5G35360_1	12.2986	20.4359	0.601816	0.00145069	0.0241693
AT5G35530_1	7.20971	11.1177	0.64849	0.000146924	0.00409273
AT5G35590_1	6.0894	9.15188	0.665372	0.000326487	0.00766682
AT5G36230_1	5.18997	8.27711	0.627027	0.000488712	0.0105686
AT5G36940_1	5.31274	15.9956	0.332137	0.000902937	0.0168295
AT5G38720_1	8.5522	1.81027	4.72426	4.26504e-06	0.000207742
AT5G39510_1	6.12476	10.207	0.600057	0.000787678	0.0151903
AT5G39570_2	7.6956	13.7407	0.560058	0.00148888	0.024432
AT5G40370_1	3.15578	8.1557	0.386942	2.5937e-18	1.57005e-15
AT5G42270_2	3.0639	4.69935	0.651985	6.16049e-08	5.28541e-06
AT5G42390_1	4.68993	9.0117	0.520427	4.11001e-11	7.85661e-09
AT5G42900_1	2.31947	3.8521	0.602131	4.0956e-05	0.00143491
AT5G42980_2	3.64599	6.9974	0.52105	4.93458e-17	2.3377e-14
AT5G43460_1	5.40712	9.95351	0.543237	0.00227434	0.0342282
AT5G45030_2	3.69331	6.93731	0.532384	0.000275183	0.00675315
AT5G47180_1	5.56248	10.1655	0.547194	0.00251002	0.0367596
AT5G47200_1	6.7832	12.6983	0.534181	7.90579e-05	0.00248964
AT5G47570_1	9.85142	15.1296	0.651136	2.74867e-05	0.00102919
AT5G47780_1	6.37576	10.8837	0.585809	0.00237971	0.0355196
AT5G47840_1	9.02629	14.2928	0.631526	4.14333e-06	0.000205208
AT5G47930_1	10.3973	17.4376	0.59626	2.09739e-05	0.000807531
AT5G48220_2	7.30931	12.9059	0.566353	0.000214852	0.00549538
AT5G48230_1	9.52161	17.2451	0.552135	0.000613277	0.0126802
AT5G48880_1	6.06237	9.56616	0.633731	0.00237904	0.0355196
AT5G49030_1	6.7997	11.3587	0.598635	1.20318e-05	0.000506171
AT5G52470_2	3.12913	5.93627	0.527121	2.42518e-08	2.40225e-06
AT5G52840_1	8.18988	14.6029	0.560839	6.406e-05	0.00207757
AT5G53140_1	10.8789	17.3004	0.628821	6.59261e-05	0.00213155
AT5G53850_1	3.73521	5.92174	0.630763	0.000470261	0.0102685
AT5G54760_1	6.63006	13.4357	0.493466	4.04694e-06	0.000201597
AT5G57035_2	11.3509	18.7913	0.604052	0.000691791	0.013755
AT5G57110_1	8.67894	13.9784	0.620883	0.000260359	0.00643283
AT5G57345_1	4.01751	6.81371	0.589622	2.10077e-06	0.000115808
AT5G58030_1	11.1063	19.6566	0.565018	0.00224209	0.0338832
AT5G58060_1	8.09547	13.4985	0.59973	0.00132827	0.0226139
AT5G58070_1	8.43356	14.3454	0.587893	0.00125538	0.0217466
AT5G59850_1	3.39413	5.27946	0.642893	0.000232005	0.00585169
AT5G59910_1	3.56995	2.3098	1.54557	6.70849e-13	1.82739e-10
AT5G61020_1	4.43206	7.96256	0.556613	0.000484865	0.0105241
AT5G61790_2	2.73769	1.60794	1.70261	1.1527e-13	3.58852e-11
AT5G62440_2	6.71208	3.26117	2.05818	5.65494e-06	0.000265587
AT5G62840_1	8.18603	15.6466	0.523182	0.00325687	0.04492
AT5G63310_1	7.39483	11.1723	0.661888	6.92165e-07	4.54327e-05
AT5G63400_1	5.25612	8.34541	0.629822	1.98957e-07	1.44037e-05
AT5G63860_1	10.8657	21.3581	0.508736	1.80507e-05	0.000710037
AT5G64050_1	8.89355	14.3943	0.617851	0.0011027	0.0196968
AT5G64350_1	5.74792	9.5769	0.600186	3.38316e-11	6.70234e-09
AT5G65050_2	6.19966	11.9816	0.517432	0.00323541	0.0447373
AT5G66120_1	8.89734	16.4837	0.539765	0.000839809	0.0159696
AT5G66380_1	4.85167	8.9824	0.540131	0.000677423	0.0135435
AT5G67560_1	8.76337	14.4987	0.604423	0.00245589	0.0362091
AT5G67590_1	7.24142	13.2253	0.547542	0.00156994	0.0255696

## Sheet: Ler vs F1LC
Peak	Enrichment		Ratio	pvalue	padj
	Ler	F1LC
AT1G01080_2	3.09141	1.3199	2.34216	1.59958e-10	9.22983e-09
AT1G01100_1	5.56295	8.42176	0.660545	5.9658e-17	8.53517e-15
AT1G01540_1	4.4166	7.31675	0.603628	0.00204712	0.0179484
AT1G01650_1	7.57838	15.4306	0.491126	0.00327894	0.0255944
AT1G01820_1	6.47571	17.4203	0.371733	1.744e-05	0.000374781
AT1G02130_1	6.09342	11.8343	0.514896	0.000281403	0.00363285
AT1G02560_1	6.90876	10.6038	0.651536	7.49379e-11	4.57691e-09
AT1G02840_1	11.0035	21.2492	0.517832	0.000349212	0.00431618
AT1G04140_1	5.63515	8.83271	0.637986	0.00478447	0.0342958
AT1G04170_1	9.70396	17.0976	0.567564	0.000766486	0.00826982
AT1G04410_1	5.02655	9.63753	0.52156	2.71974e-31	1.67088e-28
AT1G04510_1	11.0911	26.1102	0.424781	0.000127613	0.00188514
AT1G04530_1	3.9017	7.20232	0.541728	0.00362232	0.0277816
AT1G04620_1	4.03504	7.18053	0.561941	0.00117306	0.0115799
AT1G04690_1	3.2968	5.59609	0.589126	0.000758804	0.00820388
AT1G04750_1	11.2949	26.0352	0.433831	4.83021e-09	2.18384e-07
AT1G04850_1	12.5173	26.948	0.464496	0.000398839	0.00483233
AT1G05350_1	8.09199	14.408	0.56163	0.00607966	0.0409387
AT1G05850_1	5.32171	8.78774	0.605583	7.59959e-19	1.34526e-16
AT1G06200_1	11.7253	20.2069	0.580262	0.00271273	0.0221515
AT1G06290_1	3.51666	6.95026	0.505975	0.00441088	0.0323403
AT1G06390_1	6.70473	11.4989	0.583077	0.00393821	0.0296117
AT1G06430_1	5.29604	11.5378	0.459019	1.10865e-05	0.000251165
AT1G06650_1	7.55204	14.4356	0.523152	0.000538106	0.0061894
AT1G06760_1	3.6056	1.69803	2.1234	1.92518e-18	3.243e-16
AT1G07070_1	4.21167	7.03301	0.598843	0.00662499	0.0437367
AT1G07110_1	4.93405	7.75974	0.635853	0.000256409	0.00338979
AT1G07140_2	5.77963	3.59207	1.609	3.38779e-14	3.43515e-12
AT1G07420_1	9.00152	19.0169	0.473343	7.0117e-05	0.00114961
AT1G07770_1	3.99193	6.73511	0.592704	8.46741e-12	6.18417e-10
AT1G07890_1	3.42124	6.14578	0.556682	1.9183e-21	4.1739e-19
AT1G07920_1	2.09685	3.39017	0.61851	4.70525e-09	2.13659e-07
AT1G07940_1	5.66819	10.8635	0.521763	2.85349e-14	3.01028e-12
AT1G08110_1	8.68205	13.3185	0.651877	0.00309318	0.0243629
AT1G08200_1	6.01789	11.8505	0.507819	8.22468e-09	3.62441e-07
AT1G08360_1	5.77703	13.5468	0.426449	9.19132e-33	6.85672e-30
AT1G08420_1	2.31653	3.56996	0.648896	0.00478279	0.0342958
AT1G08820_1	8.8814	18.4698	0.48086	0.00272887	0.0222432
AT1G08930_2	4.04282	9.43384	0.428545	0.000894336	0.00929397
AT1G09130_1	9.79515	15.3927	0.63635	0.00115116	0.0114284
AT1G09270_2	5.82527	11.0466	0.527337	0.00275896	0.0224063
AT1G09430_1	8.13386	15.9245	0.510775	0.00115034	0.0114284
AT1G09640_1	3.03955	6.04917	0.502474	1.79084e-08	7.34502e-07
AT1G09690_1	3.22876	5.74741	0.561776	4.96325e-14	4.79964e-12
AT1G09760_1	9.06288	18.392	0.492762	0.000974849	0.00999149
AT1G09770_1	3.53825	2.20874	1.60193	0.00485521	0.0346839
AT1G09770_3	1.80314	3.39222	0.531552	9.51413e-05	0.00147208
AT1G09850_1	5.3865	11.0138	0.48907	0.00193395	0.0171899
AT1G09970_2	5.20021	3.39834	1.53022	0.000577587	0.0065855
AT1G10290_3	8.69652	18.4185	0.472161	0.000122443	0.00182164
AT1G10470_1	2.72333	4.73954	0.574598	0.000397916	0.00482675
AT1G10522_1	8.68995	14.0883	0.616821	0.00262138	0.0215402
AT1G10590_1	4.82213	8.64408	0.557854	0.000225517	0.00307079
AT1G10630_1	6.54018	10.2023	0.641047	0.0012696	0.0123346
AT1G11650_1	12.5066	28.1402	0.444439	7.32107e-13	6.16623e-11
AT1G11890_1	8.51018	17.0501	0.499127	0.0021714	0.01882
AT1G12000_1	5.46206	11.1221	0.4911	0.000463735	0.00550369
AT1G12250_1	6.88308	13.9843	0.4922	4.90437e-06	0.000125235
AT1G12360_1	9.04627	18.7107	0.48348	0.00538384	0.0372623
AT1G12470_1	4.81003	12.1022	0.397452	0.000878031	0.00918113
AT1G12810_1	4.40263	8.35296	0.527074	0.000666049	0.00742392
AT1G12840_2	9.87396	15.7784	0.625789	2.75592e-06	7.43742e-05
AT1G13060_1	8.13061	16.8694	0.481973	3.75217e-09	1.74167e-07
AT1G13190_1	5.73108	3.13356	1.82894	0.00792187	0.049781
AT1G13320_1	9.2023	16.461	0.559038	0.000295787	0.00376732
AT1G13820_1	7.29117	12.4582	0.585252	0.000524963	0.00607167
AT1G14200_1	4.64309	1.84418	2.5177	0.0003106	0.00391929
AT1G14320_1	3.8334	5.86527	0.653575	7.31896e-11	4.49643e-09
AT1G14400_1	5.27687	11.7369	0.449598	5.57639e-12	4.18992e-10
AT1G15120_1	10.8205	17.0948	0.632968	3.90201e-08	1.49277e-06
AT1G15140_1	5.56778	9.46398	0.588312	5.82619e-06	0.00014592
AT1G15860_1	5.73572	11.0211	0.520431	0.00577485	0.0392149
AT1G15930_1	6.29382	9.52813	0.660551	4.31891e-07	1.39649e-05
AT1G16210_1	7.26244	15.3741	0.47238	0.000158286	0.00225531
AT1G16210_2	3.82239	1.89012	2.0223	7.47493e-06	0.000179182
AT1G16460_1	8.24449	19.293	0.42733	2.71096e-06	7.33505e-05
AT1G16740_2	4.56059	9.37567	0.486428	0.0040129	0.030022
AT1G16890_1	6.29506	10.7561	0.585254	7.15693e-05	0.00117158
AT1G17290_2	2.45928	4.76253	0.516382	2.55759e-06	6.97427e-05
AT1G17490_1	3.43101	2.02107	1.69762	0.00351569	0.0271413
AT1G18060_1	9.75374	16.8046	0.580419	7.11838e-07	2.17381e-05
AT1G18070_1	9.13384	16.9194	0.539844	1.46025e-06	4.16691e-05
AT1G18080_1	4.74604	7.29497	0.650592	4.30799e-07	1.39649e-05
AT1G18500_2	11.6619	21.8882	0.532791	0.000869977	0.00912253
AT1G18640_1	10.653	19.709	0.540513	0.00278172	0.0225288
AT1G19660_1	4.23957	7.38653	0.573959	7.82335e-05	0.00125318
AT1G19910_1	3.73946	5.98689	0.624607	0.000664143	0.0074138
AT1G19920_1	4.94237	8.34687	0.592123	0.00171525	0.0157141
AT1G20090_1	3.61736	6.3494	0.569717	8.21747e-06	0.000193296
AT1G20225_1	4.33096	7.28917	0.594163	0.00228969	0.0196012
AT1G20260_1	15.2837	22.8472	0.668953	6.31682e-05	0.00105557
AT1G20440_2	3.96653	2.57948	1.53772	2.29574e-15	2.66408e-13
AT1G20450_1	5.11106	3.23836	1.57828	1.45887e-15	1.73142e-13
AT1G20630_1	8.31933	15.8454	0.525033	0.00175387	0.01597
AT1G20770_1	6.79949	16.0667	0.423203	0.00261002	0.0215015
AT1G20810_1	7.80629	12.6778	0.615743	0.00012016	0.00179535
AT1G20960_3	4.12445	2.39147	1.72465	0.000154462	0.00221402
AT1G21350_1	3.28373	6.61586	0.496342	0.000669696	0.00744978
AT1G21640_1	8.19022	19.0048	0.430956	0.00261248	0.0215015
AT1G22200_1	14.8651	29.5389	0.503238	0.00527522	0.0366897
AT1G22300_1	5.67347	8.57851	0.661359	1.74975e-08	7.25174e-07
AT1G22430_1	5.00216	9.19635	0.543929	0.00638315	0.0425126
AT1G22530_1	2.19099	4.05709	0.54004	0.000487972	0.00573917
AT1G22530_2	3.37102	2.21578	1.52137	8.37575e-06	0.000196576
AT1G22530_3	5.05661	3.09123	1.63579	6.90325e-07	2.12052e-05
AT1G23400_1	4.94359	9.70613	0.509327	1.0445e-05	0.000238704
AT1G23820_1	7.51123	12.2422	0.61355	0.000283443	0.00365467
AT1G23900_1	8.83808	16.5727	0.533293	0.00602184	0.0406554
AT1G23950_1	6.43903	13.6747	0.470871	0.00475325	0.0342129
AT1G23960_1	5.0167	10.1736	0.49311	0.00114024	0.0113632
AT1G24050_1	14.0207	22.8863	0.612624	0.0073173	0.0470578
AT1G24267_1	7.18893	14.6308	0.491357	0.00459391	0.0333965
AT1G24350_2	4.65108	10.7439	0.432906	0.00587325	0.0398232
AT1G24490_2	3.03709	1.82317	1.66583	0.00620559	0.041599
AT1G25260_1	7.57793	13.8908	0.545537	0.000585561	0.00666914
AT1G26550_1	13.1475	21.7771	0.603731	9.25751e-06	0.000213906
AT1G26670_1	6.6037	14.3421	0.460442	0.00202518	0.0177889
AT1G26880_1	6.46344	10.9059	0.592657	2.56444e-09	1.23015e-07
AT1G27000_1	14.2479	30.2715	0.47067	2.07709e-05	0.000429012
AT1G27320_2	6.12488	10.1347	0.604346	0.000859016	0.00902571
AT1G27530_1	10.0243	19.7206	0.508314	0.000324884	0.00406358
AT1G27580_1	5.87056	9.26566	0.633583	0.00053407	0.00614975
AT1G28140_1	5.68319	9.04978	0.627992	6.61855e-06	0.000162594
AT1G28610_1	5.95669	10.839	0.549562	0.0038556	0.0290953
AT1G29250_1	4.32887	7.43752	0.582031	0.00044788	0.00535201
AT1G29390_1	7.29506	14.3283	0.509138	3.1863e-05	0.000606151
AT1G29395_1	1.68778	2.85789	0.59057	0.000414155	0.00499473
AT1G29530_2	3.19236	1.97974	1.61251	0.00489198	0.0349227
AT1G29700_1	12.0668	24.5819	0.490884	6.68725e-05	0.00110334
AT1G29850_3	8.39786	13.1432	0.638952	0.00246157	0.020592
AT1G29880_1	8.61139	15.2102	0.566157	0.00077191	0.00831974
AT1G29900_2	3.35933	6.91928	0.485502	0.000827683	0.00878488
AT1G30630_1	4.41269	7.44073	0.593045	5.5624e-05	0.000952356
AT1G30680_1	7.5012	17.1229	0.438079	0.000739624	0.00805048
AT1G30880_1	5.48722	8.74797	0.627257	0.00308625	0.0243266
AT1G31180_1	3.01227	4.87731	0.61761	0.00713228	0.0463244
AT1G31190_1	6.99683	10.9553	0.638673	0.00444614	0.0324951
AT1G31810_2	21.5473	3.807	5.65992	4.0359e-14	3.97814e-12
AT1G31812_1	3.44836	6.50526	0.530089	2.84729e-26	1.10137e-23
AT1G32050_1	15.811	25.8639	0.611317	0.00657575	0.043494
AT1G32200_2	3.47838	6.89406	0.504548	0.000103672	0.00158995
AT1G32210_1	7.26327	15.7119	0.46228	1.75337e-06	4.94149e-05
AT1G32500_1	8.09287	13.2192	0.612206	0.000856212	0.00900532
AT1G32580_2	5.7974	8.80647	0.658312	0.00508483	0.035834
AT1G33050_1	7.76955	19.5133	0.398167	0.00669972	0.0440629
AT1G33120_1	7.60982	14.3572	0.530036	5.28853e-19	9.86311e-17
AT1G33140_1	5.336	8.36071	0.638224	3.42063e-16	4.52216e-14
AT1G33240_2	2.72498	1.80579	1.50902	0.00714504	0.0463783
AT1G33680_3	5.30588	12.1804	0.435609	0.00339989	0.0264004
AT1G33810_1	8.45172	13.1526	0.642591	6.15508e-05	0.00103516
AT1G33970_1	3.40726	2.0781	1.6396	0.00643112	0.0427269
AT1G34030_1	5.10915	9.58931	0.532796	2.27158e-11	1.53061e-09
AT1G34130_1	6.82745	13.482	0.506412	0.000292962	0.00374131
AT1G34430_1	8.83213	17.4651	0.505703	0.000189189	0.00264865
AT1G35160_1	7.45124	13.6637	0.545329	9.25734e-07	2.77827e-05
AT1G35580_1	6.01046	10.0102	0.600436	0.00598135	0.0404594
AT1G35680_2	5.18082	7.74283	0.669112	3.22628e-14	3.33617e-12
AT1G36320_1	8.24502	13.2004	0.624602	0.00143526	0.01359
AT1G36980_1	7.21967	17.2054	0.419616	1.10591e-11	7.96557e-10
AT1G42430_1	3.35522	2.19198	1.53068	0.000111593	0.00169155
AT1G43190_1	6.31503	12.0302	0.524932	0.000948705	0.00976185
AT1G45230_1	6.59148	11.3112	0.582737	3.06383e-05	0.000590381
AT1G45474_1	5.62197	9.0006	0.624622	1.75535e-06	4.94149e-05
AT1G47830_1	8.0076	15.3307	0.522326	0.0010206	0.010389
AT1G48210_1	5.06077	9.02717	0.560616	0.00463366	0.0336303
AT1G48350_1	3.85355	6.25243	0.616329	2.93126e-16	3.92488e-14
AT1G48440_1	5.47019	10.7529	0.508716	0.000418648	0.00504309
AT1G48450_1	6.53064	9.78067	0.667709	0.00258946	0.0213789
AT1G48830_1	4.87729	8.49879	0.57388	4.49552e-07	1.44465e-05
AT1G49140_1	2.61043	4.74795	0.549801	3.81489e-05	0.000692916
AT1G49300_1	8.01998	16.4969	0.486151	3.23016e-05	0.000611156
AT1G49380_1	9.83418	18.032	0.545375	0.000262316	0.00345477
AT1G49410_1	9.76543	16.7151	0.584229	0.00141651	0.0134247
AT1G49600_1	12.0847	19.6603	0.614676	0.00177946	0.0161325
AT1G49720_1	7.11946	16.2145	0.439079	1.16358e-05	0.000261342
AT1G49760_1	4.60531	8.1848	0.562666	0.000937796	0.0096782
AT1G50200_1	4.17634	7.9834	0.523128	2.82554e-07	9.36825e-06
AT1G50320_1	4.99102	8.5069	0.586703	8.38363e-08	3.06261e-06
AT1G50430_1	13.0442	22.6078	0.576979	9.4373e-05	0.00146236
AT1G51070_2	4.36189	8.32597	0.52389	0.000263636	0.00345907
AT1G51110_1	6.42365	10.287	0.624443	0.000272292	0.00353708
AT1G51200_1	3.61514	5.6023	0.645297	1.87191e-07	6.43098e-06
AT1G51610_2	4.87825	8.99218	0.542499	0.0019235	0.0171116
AT1G51650_1	5.44389	8.67697	0.627396	9.15829e-06	0.000212368
AT1G51730_1	6.16262	12.5285	0.49189	3.94832e-05	0.000708526
AT1G51730_2	3.73734	2.00751	1.86167	3.10536e-06	8.21072e-05
AT1G51940_1	8.69195	17.3527	0.500898	0.00229338	0.0196168
AT1G51980_1	7.77386	13.9875	0.555771	1.02358e-06	3.03701e-05
AT1G52510_1	7.18515	12.4434	0.577426	1.55096e-05	0.000338167
AT1G52590_1	4.61769	10.2211	0.451781	5.108e-08	1.92592e-06
AT1G52670_1	7.55279	12.6798	0.595655	0.00392841	0.0295593
AT1G52730_1	10.0689	18.5439	0.542975	0.00650885	0.0431883
AT1G52740_1	8.73082	15.1605	0.575892	3.38784e-05	0.000632962
AT1G53560_1	5.83923	9.91061	0.58919	0.00616663	0.0413643
AT1G53670_1	6.09295	13.246	0.459985	2.27542e-05	0.000460254
AT1G54080_1	4.68116	7.82379	0.598324	7.89682e-05	0.00126301
AT1G54310_1	9.9363	20.2168	0.491487	0.00568188	0.0387347
AT1G54360_1	9.18451	18.2463	0.503364	0.000723402	0.00791951
AT1G54520_1	9.6036	15.807	0.607553	7.46315e-06	0.000179182
AT1G54580_1	6.87442	11.2371	0.611759	1.73551e-07	5.98208e-06
AT1G54630_1	5.54991	9.11289	0.609018	9.70267e-09	4.18738e-07
AT1G55000_1	6.13419	12.9489	0.473722	0.00123373	0.0120324
AT1G55090_1	7.60888	25.8954	0.293831	0.000269851	0.00352367
AT1G55490_1	7.58032	12.139	0.624459	1.1826e-29	6.17556e-27
AT1G56050_1	8.26128	17.2432	0.479102	0.00121462	0.0119128
AT1G56070_1	4.87396	10.1237	0.481439	8.03633e-38	6.99429e-35
AT1G56300_2	3.01312	4.75181	0.634099	0.00512913	0.0359762
AT1G56450_1	7.80184	15.1064	0.51646	2.18331e-05	0.000447987
AT1G56500_1	4.09505	12.8376	0.318988	2.17409e-08	8.76688e-07
AT1G57870_1	4.33484	11.1831	0.387625	0.000483042	0.00568758
AT1G58080_1	4.67726	9.9472	0.470209	6.56308e-06	0.000161702
AT1G59610_2	8.48832	18.2903	0.464087	0.000499328	0.00584639
AT1G60070_1	6.98313	11.6623	0.598779	3.45861e-05	0.000640457
AT1G60780_1	7.98086	13.8787	0.575046	0.00012155	0.00181095
AT1G60870_2	3.44072	2.24667	1.53148	7.59797e-05	0.0012227
AT1G61780_1	4.33613	7.81614	0.554766	0.00636083	0.0424624
AT1G61790_1	2.42299	7.97269	0.303911	2.2326e-05	0.000453111
AT1G63610_1	7.17441	14.2258	0.504323	7.23088e-05	0.00117631
AT1G63660_1	6.43882	14.5004	0.444043	0.000979227	0.0100069
AT1G63770_1	10.0036	19.9895	0.500442	1.36287e-09	6.81045e-08
AT1G64370_2	3.02496	2.00247	1.51061	6.4557e-10	3.37117e-08
AT1G64520_1	11.3798	23.0385	0.493949	6.63205e-06	0.000162594
AT1G64550_1	11.4413	20.084	0.569675	0.00178737	0.0161672
AT1G64650_1	8.46124	17.1649	0.492938	1.08278e-05	0.000245837
AT1G64680_1	2.48982	1.59912	1.557	5.2231e-05	0.000899723
AT1G64790_1	9.63665	20.494	0.470218	0.00668749	0.044052
AT1G64850_1	5.58882	11.6048	0.481597	0.000190632	0.00266171
AT1G65260_1	12.2524	21.3955	0.57266	1.98936e-08	8.08439e-07
AT1G65270_2	5.55437	12.2216	0.454473	0.000380157	0.00464369
AT1G65430_1	8.13753	19.8951	0.409022	0.00145351	0.013738
AT1G66070_1	9.78143	19.5131	0.501275	4.39043e-05	0.00077718
AT1G66190_1	4.16785	1.804	2.31033	0.00363683	0.0278264
AT1G66330_1	5.45751	11.2197	0.486423	0.00174319	0.0159142
AT1G66670_1	7.09504	12.8161	0.553602	4.68794e-11	3.00374e-09
AT1G67230_2	3.31801	1.96599	1.6877	0.00517239	0.0361825
AT1G67350_1	8.81089	15.8289	0.556633	5.65425e-06	0.000141954
AT1G67870_1	10.1469	6.61563	1.53378	5.01974e-15	5.68305e-13
AT1G68260_1	5.67782	11.764	0.482644	0.00248403	0.0207048
AT1G68370_2	3.31399	1.8214	1.81947	0.00336198	0.0261643
AT1G68660_1	7.10472	11.9373	0.595171	0.00156863	0.0145763
AT1G68830_2	2.55665	1.61035	1.58764	0.000696601	0.00770688
AT1G69460_1	11.3403	17.9452	0.631942	0.0029362	0.0233377
AT1G69620_1	3.89158	6.30739	0.616987	5.78781e-13	4.99569e-11
AT1G69740_1	8.35712	16.0865	0.51951	1.99866e-17	3.06971e-15
AT1G69830_1	12.2138	21.1722	0.57688	0.000181928	0.00256072
AT1G70060_1	10.1408	22.9293	0.442262	0.00767601	0.0484693
AT1G70160_2	4.48959	9.70179	0.462759	0.00105765	0.0107036
AT1G70410_1	5.38701	9.83099	0.547962	1.15725e-08	4.89326e-07
AT1G70490_1	6.72845	14.1168	0.476629	9.39955e-16	1.1415e-13
AT1G70600_1	3.62201	5.72624	0.632528	0.000135188	0.00197468
AT1G70600_2	4.2984	2.54392	1.68968	2.58472e-17	3.91229e-15
AT1G71180_2	4.60439	9.11955	0.504893	0.00441257	0.0323403
AT1G71220_1	10.0913	16.7887	0.601077	0.00492137	0.0350367
AT1G71260_1	8.6336	15.1406	0.570228	0.00229755	0.0196363
AT1G71810_1	13.4184	24.8714	0.539511	0.00734763	0.0471658
AT1G71820_1	9.54645	16.0739	0.59391	0.00114007	0.0113632
AT1G72020_1	5.53933	10.6988	0.517753	1.27402e-11	9.05159e-10
AT1G72370_1	5.92972	10.1299	0.585366	1.18112e-21	2.6246e-19
AT1G72550_1	11.3264	26.1151	0.433711	4.66746e-05	0.000819277
AT1G72710_1	12.184	20.2124	0.602798	0.000125509	0.00185931
AT1G73060_1	8.95155	15.3872	0.581754	5.07212e-09	2.28333e-07
AT1G73110_1	6.54514	11.6432	0.562144	0.00160747	0.0148965
AT1G73530_1	9.75877	17.7932	0.548454	0.00013591	0.00198246
AT1G74070_2	4.6096	2.91441	1.58166	1.15083e-09	5.77852e-08
AT1G74270_1	3.84578	6.12241	0.628149	2.03643e-05	0.000425369
AT1G74340_1	10.3212	17.983	0.573946	0.00127403	0.0123465
AT1G74690_1	4.52204	7.71071	0.586462	0.00385063	0.0290788
AT1G74910_1	5.33176	9.02984	0.59046	2.72555e-05	0.000536076
AT1G74920_1	6.87021	11.1077	0.618508	0.00252147	0.0209813
AT1G75330_1	11.0078	20.9864	0.524521	0.000119174	0.00178353
AT1G75510_1	4.87046	9.05222	0.53804	0.00243427	0.0204684
AT1G75630_1	6.52484	13.7086	0.475966	0.000240012	0.00320549
AT1G75690_1	5.03214	10.1303	0.49674	7.55414e-13	6.31163e-11
AT1G75840_1	5.87773	9.60082	0.612211	0.00234388	0.0198858
AT1G75850_1	5.75049	15.3175	0.37542	0.00271196	0.0221515
AT1G76010_1	6.01039	10.582	0.567984	7.9417e-07	2.3972e-05
AT1G76010_2	5.9619	3.91621	1.52237	5.22793e-10	2.80003e-08
AT1G76150_1	9.38512	15.2518	0.615347	0.0026414	0.0216569
AT1G76180_1	3.81882	2.48465	1.53697	2.5665e-21	5.42348e-19
AT1G76200_1	14.253	24.3364	0.585667	3.04083e-07	9.95561e-06
AT1G77090_1	8.53887	13.4835	0.633285	0.00132831	0.0127508
AT1G77350_1	7.45313	13.9823	0.533041	0.00275657	0.0224044
AT1G77710_1	5.89234	11.3365	0.519768	3.44867e-08	1.32908e-06
AT1G77840_1	2.78323	1.83098	1.52008	0.00175778	0.0159915
AT1G77940_1	2.97434	4.88518	0.60885	5.85524e-07	1.84063e-05
AT1G78130_1	8.63469	23.9075	0.36117	0.00602292	0.0406554
AT1G78140_1	3.95683	8.90501	0.444338	0.000309058	0.00390775
AT1G78620_1	11.1627	19.2601	0.579577	0.000835686	0.00884392
AT1G78680_1	5.02532	7.52391	0.667914	0.00276589	0.0224277
AT1G78890_2	2.75787	4.62695	0.596044	0.00515886	0.036112
AT1G78900_1	4.87109	7.31785	0.665646	1.5953e-10	9.22983e-09
AT1G78915_1	9.95655	16.7215	0.595436	0.000175242	0.00247663
AT1G79010_1	12.3178	20.1672	0.610785	4.82425e-05	0.000839741
AT1G79210_1	11.2566	24.178	0.46557	3.83464e-05	0.000695005
AT1G79500_1	8.87664	14.8084	0.599434	0.00467379	0.0338041
AT1G79530_1	4.5443	16.5571	0.274463	0.00030756	0.00389824
AT1G79550_1	3.58517	5.90633	0.607005	0.000189722	0.00265255
AT1G79600_1	8.94907	13.586	0.658698	0.00543341	0.0374071
AT1G79650_1	13.788	29.6753	0.464627	0.00400475	0.0299977
AT1G79750_1	6.71168	13.6168	0.492895	2.41717e-10	1.37201e-08
AT1G79810_2	8.54981	17.5297	0.487732	0.00524016	0.0365156
AT1G80030_1	8.64183	13.9106	0.62124	0.000843471	0.00890719
AT1G80070_1	10.1295	20.9888	0.482616	8.91015e-05	0.00140514
AT1G80180_1	3.23924	2.13329	1.51843	0.00351069	0.0271413
AT1G80230_1	8.00568	15.2312	0.525612	0.000716836	0.0078731
AT1G80480_1	9.46238	15.9453	0.593429	3.99565e-08	1.52301e-06
AT1G80560_1	9.45111	17.2722	0.547185	0.00473823	0.0341283
AT1G80600_1	5.58917	9.32592	0.599315	7.91087e-06	0.000187349
AT1G80790_4	6.85092	4.54982	1.50575	0.00144232	0.0136446
AT2G01110_1	7.816	14.7556	0.529695	5.94792e-10	3.13737e-08
AT2G01220_1	13.5058	26.7371	0.505132	0.00215577	0.0187001
AT2G01320_1	10.4957	25.3	0.41485	1.58015e-05	0.000343814
AT2G01340_1	12.249	21.1633	0.578784	0.00696673	0.0454885
AT2G01350_1	9.03632	16.2206	0.557089	0.00118082	0.0116454
AT2G01470_1	7.119	13.8592	0.513665	0.0055629	0.0381226
AT2G01720_1	9.22622	17.1306	0.538582	0.00236351	0.0200036
AT2G02470_1	3.42346	1.81201	1.88932	0.00473615	0.0341283
AT2G02760_1	5.01101	9.57531	0.523326	1.29239e-13	1.17371e-11
AT2G03640_1	4.09461	6.51691	0.628306	0.005517	0.0379076
AT2G03690_1	7.85073	13.5893	0.577715	0.00471227	0.0340473
AT2G04630_1	12.2891	18.955	0.648328	0.00199572	0.0175744
AT2G04900_1	6.56163	10.55	0.621953	0.0026995	0.022078
AT2G05220_1	2.97916	6.24619	0.476956	1.91989e-18	3.243e-16
AT2G05380_1	4.74362	1.77913	2.66627	6.90326e-15	7.66997e-13
AT2G05520_1	3.38527	1.89674	1.78479	1.18278e-101	6.17649e-98
AT2G06530_2	2.78157	1.65203	1.68373	0.0056667	0.0386565
AT2G11000_1	7.56122	17.623	0.429054	0.00592488	0.0401293
AT2G11520_1	5.06974	11.1393	0.45512	0.00694003	0.0453862
AT2G14045_1	3.22016	10.2025	0.315624	3.92245e-06	0.000102065
AT2G14720_1	12.1404	20.9667	0.579031	0.00177334	0.016091
AT2G14890_2	3.7262	6.08569	0.612288	6.14038e-06	0.000152328
AT2G14910_1	5.65876	10.5622	0.535758	2.53015e-08	9.97165e-07
AT2G15280_1	5.56527	10.9781	0.506942	0.00442951	0.0324189
AT2G15290_1	10.8473	19.6257	0.552709	4.98712e-05	0.000863427
AT2G16710_1	8.06118	18.0636	0.446267	0.000917209	0.00948449
AT2G17190_1	7.8895	12.1116	0.651398	0.00664458	0.0438383
AT2G17340_1	6.82901	13.054	0.523137	0.0030319	0.0239344
AT2G17840_1	5.91154	12.2702	0.481781	0.000661786	0.00740803
AT2G17870_2	3.37191	1.91028	1.76514	6.42521e-05	0.00106855
AT2G17972_1	7.03401	4.51485	1.55797	3.09733e-06	8.21029e-05
AT2G17972_2	2.69384	4.88626	0.551308	0.00416652	0.0308837
AT2G18040_2	11.1248	17.4028	0.639249	0.00235985	0.0199889
AT2G18710_1	5.10493	9.3466	0.54618	5.57651e-06	0.00014034
AT2G18740_1	12.9394	22.2082	0.58264	0.00191283	0.0170702
AT2G18790_2	8.90223	18.367	0.484686	0.000596476	0.0067713
AT2G19520_2	10.372	19.5694	0.530012	9.28778e-05	0.00144133
AT2G19680_1	4.57105	7.85134	0.5822	0.00127674	0.0123465
AT2G20060_1	8.32919	20.7968	0.400504	0.00073999	0.00805048
AT2G20230_1	12.3169	18.6353	0.660943	0.00369788	0.0281903
AT2G20270_1	9.0484	14.7375	0.613971	0.000298468	0.00379684
AT2G20360_1	6.43734	10.8995	0.590609	2.606e-05	0.000515475
AT2G20570_1	4.90239	10.3566	0.473359	5.27622e-05	0.000905717
AT2G20690_2	4.69709	8.5778	0.547586	0.000150289	0.00217099
AT2G20725_1	7.70422	12.4035	0.621131	0.00194911	0.0172221
AT2G20760_2	2.81312	1.77046	1.58892	3.088e-05	0.000593942
AT2G20840_1	7.05428	15.4819	0.455647	0.00319752	0.0250525
AT2G20860_1	6.41947	13.4439	0.477501	4.61278e-05	0.000811041
AT2G21170_1	8.34549	14.3858	0.580121	1.50413e-23	4.48834e-21
AT2G21240_1	3.34674	12.6028	0.265555	0.000523053	0.00605628
AT2G21250_1	4.60689	7.48076	0.615832	0.000151832	0.00219025
AT2G21330_1	3.55024	2.27882	1.55793	2.52647e-25	9.09876e-23
AT2G21340_1	8.64469	16.2435	0.532194	0.0023046	0.0196484
AT2G21390_1	5.39243	3.1738	1.69904	3.53134e-05	0.000649319
AT2G21580_1	3.30539	5.34652	0.618231	6.13552e-05	0.00103516
AT2G21960_1	9.53652	15.354	0.621108	0.00227217	0.0194832
AT2G22230_2	5.86596	10.3068	0.569135	0.000326898	0.004079
AT2G22450_1	5.88298	13.1759	0.446494	6.15031e-05	0.00103516
AT2G22980_1	4.125	8.51615	0.484374	3.1599e-05	0.000603064
AT2G23080_1	7.81441	13.9102	0.561774	0.000252975	0.00334863
AT2G23810_1	4.51725	9.65469	0.467882	0.00473257	0.0341283
AT2G23930_1	14.5011	25.3806	0.571344	2.68056e-05	0.000528222
AT2G24120_1	4.74381	8.39872	0.564825	0.00427542	0.0316012
AT2G24270_1	9.67954	17.8392	0.542601	5.75581e-05	0.000980647
AT2G25080_1	6.11233	10.7699	0.567536	4.5027e-06	0.000115828
AT2G25430_3	3.48061	7.1301	0.488158	0.00207923	0.018172
AT2G25610_1	6.0271	10.2809	0.586241	0.00379278	0.0287458
AT2G25730_1	9.66704	15.7321	0.614478	0.00257794	0.0213175
AT2G25870_1	4.96499	7.85399	0.632161	0.0061385	0.0412219
AT2G25910_1	6.41112	9.61635	0.666689	0.00371788	0.0283014
AT2G25950_1	5.11415	11.3208	0.451749	0.00231019	0.0196639
AT2G26330_1	6.64985	12.5556	0.529632	0.00294646	0.0233836
AT2G26510_1	7.31822	14.0482	0.520937	0.00288114	0.0230933
AT2G26540_1	8.17642	15.5225	0.526746	0.00244812	0.0205202
AT2G26770_1	8.5189	21.7293	0.392047	0.000434215	0.0052067
AT2G26900_1	5.83026	8.77632	0.664317	6.46485e-06	0.000159997
AT2G26920_2	15.2608	43.5443	0.350466	0.000892608	0.00928526
AT2G26930_1	11.9051	25.918	0.459337	0.000221218	0.00302013
AT2G26980_1	8.2624	20.7443	0.398297	2.07484e-06	5.74791e-05
AT2G26990_1	9.84993	20.8015	0.473521	0.00764171	0.048316
AT2G27020_1	12.2539	22.1286	0.55376	6.2186e-10	3.26367e-08
AT2G27350_1	5.52244	12.3289	0.447928	0.000237652	0.0031821
AT2G27530_1	4.57886	7.66079	0.597701	2.58884e-12	2.03292e-10
AT2G27600_1	4.0558	6.63676	0.611112	7.7328e-05	0.00124248
AT2G27680_1	5.80838	10.966	0.529674	2.89223e-08	1.13558e-06
AT2G27960_1	4.3419	7.91191	0.54878	0.00110228	0.0110623
AT2G28000_1	4.90052	7.96237	0.61546	1.08315e-08	4.61731e-07
AT2G28190_2	4.80134	7.93065	0.605416	1.36989e-13	1.23337e-11
AT2G29360_1	2.15716	3.93576	0.548093	0.00371539	0.0283014
AT2G29390_1	5.08586	8.9268	0.569729	0.00052878	0.00609556
AT2G29530_1	7.53285	11.7111	0.643221	0.00127206	0.0123465
AT2G29650_1	5.63962	12.826	0.439704	1.14314e-05	0.00025786
AT2G29690_1	6.69428	13.8287	0.484085	0.0025564	0.0211897
AT2G30110_1	9.82295	16.4289	0.597906	0.00138317	0.0131805
AT2G30200_1	4.35042	6.57627	0.661532	9.12804e-05	0.0014194
AT2G30740_1	7.33376	14.498	0.505846	0.00124086	0.0120892
AT2G30970_1	12.856	19.2869	0.666565	0.0012182	0.011924
AT2G31060_1	7.16332	13.5262	0.529587	0.000347657	0.00430205
AT2G31440_1	10.126	19.4689	0.520109	0.00130018	0.0125234
AT2G31560_1	4.32019	1.93514	2.2325	2.59514e-09	1.23761e-07
AT2G31610_1	6.106	10.8655	0.561961	6.20769e-16	7.71823e-14
AT2G31660_3	8.33475	13.7824	0.604737	0.00606185	0.0408451
AT2G31955_1	8.29223	17.4542	0.475084	0.00660275	0.043645
AT2G32080_1	2.98404	4.90817	0.607973	0.00241726	0.020376
AT2G32160_2	3.3425	5.13751	0.650607	0.000146201	0.00211778
AT2G32520_1	9.70698	14.965	0.648645	0.007476	0.0477022
AT2G32690_1	4.87758	3.05725	1.59541	6.53999e-29	3.10471e-26
AT2G32950_1	7.34439	16.5879	0.442756	0.00210347	0.0183072
AT2G33040_1	8.73787	16.2981	0.536127	4.24391e-17	6.24273e-15
AT2G33120_1	6.98541	15.6893	0.445234	0.000205859	0.00284767
AT2G33150_1	3.53345	7.00157	0.504666	3.86779e-16	5.0494e-14
AT2G33220_1	5.65226	11.4313	0.494456	2.32372e-06	6.36979e-05
AT2G33330_1	4.95869	10.6806	0.464272	0.00185299	0.0166546
AT2G33340_1	10.8783	18.189	0.598072	0.0022742	0.0194846
AT2G34310_1	8.19058	15.5832	0.525601	0.00193633	0.0171964
AT2G34480_1	6.24091	9.39156	0.664523	4.57181e-12	3.53689e-10
AT2G34560_1	3.96648	7.6839	0.516207	0.00107105	0.0108078
AT2G34590_1	3.5133	5.46628	0.642722	0.0067563	0.044407
AT2G34640_1	7.44809	12.5846	0.591841	0.00165557	0.0152611
AT2G34860_1	8.22583	16.4554	0.499886	1.21197e-12	9.96677e-11
AT2G35040_1	7.44432	11.8563	0.627878	3.43456e-05	0.000639403
AT2G35050_1	9.43984	16.5044	0.571958	0.00030566	0.00387887
AT2G35635_2	3.83408	7.24784	0.528996	0.000226475	0.00307982
AT2G35790_1	9.80491	23.3008	0.420798	0.00273461	0.0222432
AT2G35860_1	3.03289	1.86807	1.62354	0.00747687	0.0477022
AT2G36250_1	7.07839	10.6776	0.66292	0.00224687	0.0193456
AT2G36390_1	6.28377	9.86064	0.637258	0.0010936	0.0109974
AT2G36530_1	7.3953	13.0499	0.566694	1.36041e-14	1.44981e-12
AT2G37050_2	5.48284	12.0196	0.456158	0.00572267	0.0389365
AT2G37250_1	12.662	22.2343	0.569478	0.00243606	0.0204684
AT2G37270_1	6.72255	11.7057	0.574295	8.68426e-05	0.00137422
AT2G37470_1	3.52504	1.68628	2.09042	6.27199e-08	2.32286e-06
AT2G37500_1	8.04146	15.9356	0.504622	0.000720695	0.00789815
AT2G37540_1	3.64998	6.45909	0.565093	0.00225614	0.0193775
AT2G37630_3	5.70416	3.76374	1.51556	4.54469e-05	0.000801769
AT2G38020_1	10.1159	21.2316	0.476454	0.00653245	0.0432899
AT2G38140_2	2.34565	1.52081	1.54237	1.47962e-13	1.32078e-11
AT2G38230_1	2.68905	1.52008	1.76902	5.30716e-22	1.31971e-19
AT2G38700_1	10.048	17.0277	0.590101	0.00255851	0.0211904
AT2G38710_1	8.06349	18.9998	0.424398	0.000568127	0.00649892
AT2G39080_1	9.42924	17.0331	0.553584	0.00380058	0.0287841
AT2G39190_1	8.80349	13.3816	0.65788	0.0039492	0.029673
AT2G39900_1	5.79463	12.7364	0.454964	8.94209e-06	0.000208929
AT2G39930_3	8.46362	15.1196	0.559779	0.00151184	0.0141866
AT2G40300_1	4.19398	11.0706	0.378838	0.00037219	0.00457312
AT2G40510_1	2.96917	1.68487	1.76226	8.31936e-15	9.05077e-13
AT2G40590_1	1.15608	2.27721	0.507674	0.0022364	0.0192873
AT2G40660_1	3.21136	1.90521	1.68557	3.54946e-05	0.00065036
AT2G40840_1	3.53086	8.17483	0.431918	1.08246e-13	9.91686e-12
AT2G41420_1	4.90421	8.47763	0.578488	2.82007e-05	0.000549492
AT2G41840_1	4.98691	7.98242	0.624737	2.4031e-12	1.90136e-10
AT2G42130_1	6.65917	11.4185	0.58319	0.000368734	0.00454134
AT2G42220_1	2.48981	4.17251	0.596718	2.18742e-11	1.48347e-09
AT2G42230_1	3.75222	8.39951	0.446718	0.000130299	0.00191938
AT2G42310_1	6.22722	10.8604	0.573385	0.000875758	0.00917394
AT2G42390_1	8.74484	18.5286	0.471964	0.00196208	0.017322
AT2G42580_2	4.29915	7.65317	0.561748	0.00762588	0.0482988
AT2G42590_1	9.55954	16.4438	0.581345	5.2993e-11	3.37475e-09
AT2G43020_1	5.59602	11.944	0.468522	0.0033656	0.026173
AT2G43070_1	7.47209	11.6619	0.640726	0.00176084	0.0159915
AT2G43090_2	4.53276	7.84371	0.577884	0.000247716	0.00328736
AT2G43160_1	3.23042	2.01551	1.60278	2.0353e-06	5.66598e-05
AT2G43160_2	9.8442	15.2628	0.644981	0.00130821	0.0125694
AT2G43750_1	4.17669	7.32047	0.570549	3.93524e-09	1.81857e-07
AT2G43790_1	6.72879	11.2806	0.596493	0.00482602	0.0345462
AT2G43945_1	6.6156	16.8382	0.392892	3.47249e-06	9.13519e-05
AT2G44040_1	7.55958	13.4325	0.56278	0.00689981	0.0451514
AT2G44100_1	12.378	26.5652	0.46595	1.06087e-08	4.54085e-07
AT2G44530_1	10.3972	21.8212	0.476472	0.000977604	0.0100069
AT2G44610_1	8.63018	15.5015	0.556731	5.10642e-06	0.000129445
AT2G44620_1	7.7103	13.1144	0.587926	7.43879e-05	0.00120264
AT2G45660_1	7.64387	14.6998	0.519997	2.48776e-05	0.000495843
AT2G46170_1	4.90448	9.8223	0.499321	2.61508e-05	0.000516294
AT2G46280_1	5.34728	8.35994	0.639632	0.00252723	0.0209813
AT2G46540_1	6.1454	11.3761	0.540204	2.21378e-05	0.000451576
AT2G46910_1	11.4688	24.8834	0.460901	0.00151498	0.0142032
AT2G47070_2	9.22223	19.5483	0.471767	0.00787454	0.0495809
AT2G47170_1	5.01118	10.4096	0.4814	1.46337e-22	3.91882e-20
AT2G47210_1	7.95339	21.1197	0.376586	8.10324e-05	0.00129233
AT2G47510_1	4.99516	9.9347	0.5028	4.96374e-06	0.000126134
AT2G47610_1	10.4057	17.458	0.596044	1.04713e-11	7.59457e-10
AT2G47940_1	6.4362	9.64504	0.667307	0.000351609	0.00434067
AT2G48060_1	13.9506	32.7334	0.426188	0.00301259	0.0237999
AT2G48070_1	8.30781	13.7288	0.605136	0.000884746	0.00923106
AT2G48120_1	6.32337	3.59437	1.75924	0.00129729	0.0125105
AT3G01130_1	5.46535	11.4894	0.475685	4.05415e-08	1.53969e-06
AT3G01150_1	6.95212	17.0577	0.407566	0.00724409	0.046725
AT3G01310_1	4.69571	9.81381	0.47848	0.0021395	0.0186053
AT3G01370_1	3.34742	2.2087	1.51556	0.0075953	0.048184
AT3G01510_1	4.76574	7.4224	0.642075	0.00322697	0.0252264
AT3G01520_1	3.69054	6.14099	0.600968	0.00433906	0.0319958
AT3G01910_1	8.10495	17.7256	0.457245	2.11068e-07	7.11094e-06
AT3G02080_1	6.36457	11.1504	0.570792	9.76907e-08	3.49412e-06
AT3G02090_1	5.69449	11.5486	0.49309	3.30808e-10	1.83774e-08
AT3G02180_1	2.18757	1.42287	1.53744	0.000124868	0.00185508
AT3G02540_1	6.35549	13.4964	0.470904	0.000752169	0.00814057
AT3G02600_1	6.8162	11.3009	0.603155	0.00697311	0.0454885
AT3G02720_1	7.57633	12.7615	0.593687	0.00180843	0.0162962
AT3G02900_1	5.72074	14.8617	0.384932	0.000106439	0.00162284
AT3G03070_1	7.20435	12.6517	0.569438	3.37756e-05	0.000632962
AT3G03920_1	5.0964	7.74709	0.657847	0.0032982	0.0257062
AT3G04240_1	10.9499	24.8867	0.439991	4.48467e-06	0.000115649
AT3G04400_1	3.47268	6.76829	0.51308	4.12803e-31	2.39518e-28
AT3G04560_1	2.97105	7.1096	0.417892	0.000230724	0.00312135
AT3G04780_1	6.97132	15.1348	0.460616	0.00484024	0.0346243
AT3G04830_1	7.84255	16.5663	0.473404	0.000231738	0.00312697
AT3G04840_1	5.58106	11.0416	0.505459	2.4444e-27	1.06372e-24
AT3G04870_1	7.98279	12.8163	0.622862	0.00746606	0.0476915
AT3G05000_1	4.90262	10.1949	0.480888	0.00130333	0.0125341
AT3G05410_1	8.90225	20.194	0.440836	0.000782518	0.0084167
AT3G05520_1	6.85896	14.6002	0.469785	0.00103151	0.0104694
AT3G05560_1	3.84716	6.55222	0.587153	6.1955e-05	0.00103862
AT3G05840_2	5.00123	9.99941	0.500152	0.000134368	0.00196546
AT3G05970_1	5.03375	9.65512	0.521356	0.00242173	0.0203972
AT3G06310_1	9.70083	17.3083	0.560472	0.000390881	0.00475667
AT3G06350_1	4.37756	8.45144	0.517966	0.000794225	0.00849016
AT3G06400_2	3.81092	2.45739	1.5508	0.00207218	0.0181255
AT3G06483_1	7.4018	17.2532	0.42901	7.02209e-11	4.3654e-09
AT3G06580_1	5.45206	9.26971	0.588159	0.00509781	0.0358529
AT3G06610_1	7.6552	13.8073	0.554433	0.000498884	0.00584639
AT3G06720_2	5.66279	10.4657	0.54108	0.000395571	0.00480389
AT3G06930_1	3.68924	5.78446	0.637783	0.00442799	0.0324189
AT3G07100_2	2.56437	1.36124	1.88385	0.00477439	0.0342942
AT3G07160_1	10.2736	21.1322	0.48616	0.000115869	0.00174622
AT3G07170_1	12.8407	26.2501	0.489168	0.00787579	0.0495809
AT3G07480_1	9.11023	14.3958	0.632839	0.00221865	0.0191504
AT3G07568_1	17.0441	31.0603	0.548742	0.00466009	0.0337283
AT3G07680_1	6.45433	10.8076	0.597204	0.000432846	0.00520212
AT3G08510_1	8.16581	14.9283	0.547004	7.8605e-10	4.02427e-08
AT3G08530_1	7.37373	15.3828	0.479348	0.00019135	0.00266817
AT3G08580_1	5.77004	9.83962	0.586408	3.48929e-24	1.07183e-21
AT3G08590_1	6.77663	10.4715	0.647149	0.00347133	0.0268951
AT3G08610_1	7.36306	12.2229	0.6024	6.06392e-11	3.79231e-09
AT3G08690_1	8.26014	14.801	0.558081	0.00116293	0.0115125
AT3G08930_2	8.3812	19.158	0.437477	0.00110813	0.0110855
AT3G09200_1	8.07827	14.9169	0.541552	6.59942e-18	1.06037e-15
AT3G09410_1	6.10085	10.2406	0.595753	0.00587587	0.0398232
AT3G09440_1	2.9473	1.93743	1.52125	4.20241e-22	1.07049e-19
AT3G09740_1	9.53712	17.9605	0.531006	9.23234e-08	3.33642e-06
AT3G09860_1	8.40827	15.503	0.542363	2.23432e-05	0.000453111
AT3G09900_1	7.80101	18.2675	0.427044	0.00171845	0.0157296
AT3G10060_1	5.08197	8.5082	0.597302	2.28876e-05	0.000461464
AT3G10070_1	8.89255	14.3762	0.618562	0.00548751	0.0377298
AT3G10130_3	6.02117	13.2174	0.455549	8.93837e-05	0.00140514
AT3G10220_1	5.94602	13.3423	0.445651	9.73088e-05	0.00150117
AT3G10230_1	5.20944	11.11	0.468895	6.80108e-05	0.00111859
AT3G10350_1	8.42065	15.7299	0.535327	0.0001064	0.00162284
AT3G10410_1	10.0708	15.192	0.662901	0.000206617	0.00285437
AT3G10850_1	7.67256	12.9394	0.592961	8.99172e-08	3.27211e-06
AT3G10970_1	6.78967	12.9289	0.525154	1.11562e-05	0.000252198
AT3G11500_1	6.71211	17.987	0.373164	2.20464e-05	0.000451476
AT3G11510_1	3.57256	5.94965	0.600466	6.90597e-12	5.15185e-10
AT3G11630_2	4.80902	7.59628	0.633076	1.65057e-23	4.65906e-21
AT3G11710_2	4.72004	2.9575	1.59596	1.14461e-06	3.3674e-05
AT3G11780_1	7.21154	16.6932	0.432004	3.33267e-05	0.000626777
AT3G11830_1	4.99657	9.07075	0.550844	0.000724804	0.00792655
AT3G11910_1	7.59657	11.8025	0.64364	0.00188952	0.0168957
AT3G12080_1	4.93478	7.38336	0.668366	0.00168806	0.0155194
AT3G12140_1	6.41741	14.558	0.440817	0.000220955	0.00302013
AT3G12260_1	7.81151	16.2806	0.479804	9.47073e-09	4.13859e-07
AT3G12290_1	4.17326	9.54027	0.437436	3.05887e-06	8.14971e-05
AT3G12800_1	9.31788	15.2753	0.609998	0.000131789	0.0019386
AT3G13180_1	7.72454	14.7093	0.525146	0.000717204	0.0078731
AT3G13410_1	8.3557	16.815	0.496919	4.63322e-14	4.52237e-12
AT3G13870_1	7.5551	12.8898	0.586129	3.38584e-05	0.000632962
AT3G13930_1	9.8615	17.9355	0.549832	7.85487e-06	0.000186446
AT3G14180_2	4.09372	1.47773	2.77027	0.00316481	0.0248521
AT3G14390_2	6.56682	12.2214	0.53732	0.00376457	0.0285735
AT3G14660_1	3.33836	5.68257	0.587475	0.00542089	0.0373948
AT3G15190_1	7.65136	11.5776	0.660875	4.95466e-06	0.000126134
AT3G15520_1	8.26176	12.5422	0.658717	0.0035687	0.0274864
AT3G15580_1	6.31121	11.6423	0.542093	0.000250991	0.00332658
AT3G15640_1	10.3394	19.3548	0.534201	9.02727e-05	0.00140928
AT3G15710_1	5.88702	11.2005	0.525603	0.00533463	0.0369707
AT3G15730_1	6.86669	11.1977	0.613221	1.34628e-06	3.89489e-05
AT3G15880_1	7.54521	14.544	0.518785	0.00281233	0.0226986
AT3G16110_1	8.13847	17.0148	0.478316	0.00278787	0.0225376
AT3G16140_1	3.7453	6.52603	0.573902	5.53655e-34	4.44798e-31
AT3G16270_1	3.51575	7.27432	0.48331	0.00107865	0.0108739
AT3G16640_1	3.49146	6.00673	0.581258	3.41645e-32	2.23009e-29
AT3G17410_1	7.48346	13.5254	0.553289	0.00149573	0.014086
AT3G17440_1	6.21282	13.0465	0.476206	0.000263375	0.00345907
AT3G17780_1	7.56045	12.5365	0.603074	0.00367489	0.0280355
AT3G18035_1	5.69008	3.70249	1.53683	0.00010538	0.00161151
AT3G18165_2	7.73349	13.4537	0.574821	0.00576996	0.0392072
AT3G18410_2	8.67477	15.9404	0.544201	1.16072e-05	0.000261262
AT3G18500_2	7.90265	13.9877	0.564971	0.000463702	0.00550369
AT3G18600_1	5.16037	11.6185	0.444152	0.000424487	0.00510754
AT3G18740_1	4.24591	7.36223	0.576715	7.72742e-13	6.40517e-11
AT3G19420_1	8.59587	15.3036	0.561688	0.00317785	0.0249358
AT3G19760_1	14.3877	22.5081	0.639223	1.85681e-05	0.000392562
AT3G20050_1	8.78396	14.3025	0.614157	0.000476826	0.00563984
AT3G20060_1	3.23847	4.92791	0.657169	0.00391665	0.029492
AT3G20290_1	11.5278	25.4485	0.452984	6.46934e-05	0.00107418
AT3G20330_1	8.37843	17.6687	0.474196	0.00178792	0.0161672
AT3G20510_1	7.15346	13.0103	0.549832	0.00258256	0.0213388
AT3G20790_1	8.76872	16.1616	0.542565	0.000325931	0.0040718
AT3G20810_2	4.87595	7.89003	0.617989	0.00541198	0.0373904
AT3G21215_2	5.77028	12.2276	0.471908	0.00352938	0.0272035
AT3G21865_1	10.0226	24.8958	0.402584	6.56469e-06	0.000161702
AT3G22231_1	19.7575	6.37178	3.10077	0.00399929	0.0299847
AT3G23080_1	7.4934	18.7426	0.399807	8.5678e-06	0.000200632
AT3G23310_2	4.01045	6.96806	0.575547	0.00029027	0.00371974
AT3G23400_1	3.80566	6.53857	0.582032	2.8566e-07	9.44126e-06
AT3G23530_1	9.00617	19.7185	0.456738	8.62391e-05	0.00136674
AT3G23620_1	3.42065	5.66632	0.603681	0.000134343	0.00196546
AT3G23660_1	5.51735	13.5769	0.406378	0.00621608	0.0416426
AT3G23700_1	7.30991	11.4551	0.638136	6.66135e-07	2.05832e-05
AT3G23940_2	5.66802	8.82412	0.642333	2.95839e-07	9.74682e-06
AT3G23990_1	2.04646	1.33369	1.53443	7.5904e-07	2.30448e-05
AT3G24170_1	9.63423	18.0767	0.532963	0.00300536	0.0237607
AT3G24180_1	8.11446	15.4397	0.525557	0.00739173	0.0473906
AT3G24430_1	6.63303	11.5082	0.576375	7.20098e-05	0.00117328
AT3G25040_1	9.62474	19.2625	0.499662	2.40345e-05	0.000482723
AT3G25220_1	8.54884	14.7569	0.579313	0.000787969	0.00844923
AT3G25230_4	8.01713	12.5058	0.641071	0.00127594	0.0123465
AT3G25470_1	10.0685	19.7356	0.510169	0.000133233	0.00195433
AT3G25480_1	4.71492	8.68174	0.543085	0.00119403	0.0117424
AT3G25530_1	7.45494	12.1615	0.612993	9.43547e-06	0.000217537
AT3G25660_1	6.80668	11.2015	0.607658	0.00139593	0.0132537
AT3G26060_2	7.02482	12.293	0.571449	7.98356e-15	8.77687e-13
AT3G26360_1	3.91674	6.91933	0.566058	0.00602497	0.0406554
AT3G27090_1	9.50507	15.1061	0.629219	2.8152e-05	0.000549492
AT3G27380_2	7.05919	11.3463	0.622158	0.00109406	0.0109974
AT3G27430_1	8.13191	12.4324	0.654091	0.000618951	0.0070036
AT3G27740_1	7.18258	13.7091	0.523929	5.15051e-08	1.93496e-06
AT3G27750_1	6.10868	9.79348	0.62375	0.00669384	0.044052
AT3G27890_1	6.96138	12.6314	0.551116	0.00230237	0.0196454
AT3G28710_1	7.93826	16.6681	0.476254	4.76566e-10	2.57889e-08
AT3G28715_1	8.52158	14.4756	0.588687	0.000569751	0.00651037
AT3G28900_1	5.64503	9.16753	0.615763	0.000391227	0.00475667
AT3G28950_1	4.15781	13.8691	0.29979	3.1643e-05	0.000603064
AT3G29320_1	5.19582	10.4475	0.497325	3.89465e-14	3.91112e-12
AT3G42050_1	13.3756	22.6637	0.590179	1.45235e-11	1.02489e-09
AT3G42170_1	4.08197	10.1856	0.400761	0.0068122	0.0447182
AT3G42790_2	2.24573	1.42806	1.57258	0.00741977	0.0475412
AT3G43800_1	4.89454	3.15791	1.54993	0.000494182	0.00580567
AT3G43810_2	6.83633	12.8266	0.532983	2.38503e-08	9.48705e-07
AT3G44010_1	1.61409	3.83581	0.420794	2.10544e-10	1.2016e-08
AT3G44330_1	7.36642	12.4238	0.592927	0.00689503	0.0451514
AT3G44340_1	5.5716	19.3922	0.287311	1.60506e-05	0.000348508
AT3G44750_1	4.10839	8.29014	0.495575	0.000285948	0.00367788
AT3G45050_1	8.6055	16.1412	0.533139	0.00293561	0.0233377
AT3G45160_1	2.16277	1.3277	1.62897	0.00435315	0.0320622
AT3G45310_1	6.25941	10.1316	0.617809	0.0052935	0.0367589
AT3G45980_1	5.97657	3.71692	1.60794	6.02762e-13	5.16004e-11
AT3G46000_1	4.26774	6.76069	0.631258	8.46746e-05	0.00134603
AT3G46010_1	4.97732	8.72883	0.570217	2.96918e-07	9.75161e-06
AT3G46030_1	2.7451	1.8152	1.51228	2.91655e-06	7.83044e-05
AT3G46430_2	4.13144	7.6323	0.541309	3.34739e-06	8.82831e-05
AT3G46630_1	6.62837	11.6139	0.570728	0.00135574	0.01297
AT3G47810_1	2.96394	5.5898	0.530241	0.0018262	0.0164421
AT3G48140_1	7.8353	11.9603	0.655108	3.10264e-09	1.46484e-07
AT3G48890_1	6.24529	10.4676	0.59663	0.00154752	0.0144049
AT3G48930_1	4.56694	6.90863	0.661049	6.01117e-07	1.87966e-05
AT3G49080_1	5.88793	11.4041	0.516298	0.00496062	0.0352441
AT3G49430_1	10.1793	21.5268	0.472866	3.5418e-05	0.000650098
AT3G49600_1	6.05419	14.0377	0.431282	0.000369854	0.00454977
AT3G49870_1	3.21848	6.14801	0.523499	0.00122865	0.012015
AT3G50530_1	9.28315	19.1123	0.485715	0.00135612	0.01297
AT3G50790_1	8.04091	15.4963	0.518891	0.00718053	0.0464987
AT3G50830_1	3.81692	6.2582	0.609908	0.00286827	0.023061
AT3G51130_1	5.35695	12.3814	0.432662	0.00108047	0.0108818
AT3G51370_2	8.33148	16.7059	0.498714	0.000289595	0.00371564
AT3G51460_1	10.6518	23.871	0.446221	0.00029464	0.00375729
AT3G51820_1	6.69717	10.1742	0.658249	9.8402e-08	3.50754e-06
AT3G51830_1	8.50019	18.9621	0.448272	0.00523726	0.0365156
AT3G51870_1	7.38654	12.9608	0.569916	0.00020996	0.00289291
AT3G52090_1	5.78858	10.131	0.571373	0.000595264	0.0067649
AT3G52120_1	8.75178	20.2424	0.432348	0.00367021	0.0280202
AT3G52180_1	7.99995	13.7166	0.583233	2.29574e-06	6.30967e-05
AT3G52580_1	8.6715	17.3857	0.498771	0.0021738	0.0188252
AT3G52640_1	5.20231	12.1637	0.427691	0.00102634	0.0104272
AT3G52730_1	6.96317	11.4277	0.609324	5.81275e-05	0.000987128
AT3G52750_1	6.71696	13.5591	0.495384	0.000783591	0.00841957
AT3G52860_1	6.68174	14.9856	0.445878	0.00559317	0.0383049
AT3G52880_1	9.60898	14.866	0.646374	6.35511e-08	2.34533e-06
AT3G52990_1	6.77186	10.7927	0.627449	4.83572e-05	0.000840337
AT3G53020_1	4.73819	7.41521	0.638982	8.79257e-05	0.00138925
AT3G53180_1	7.91395	17.3252	0.456789	0.000270247	0.00352367
AT3G53430_1	4.27467	6.50053	0.657588	0.00185497	0.0166581
AT3G53460_1	1.54598	4.23499	0.365049	5.00503e-114	5.22726e-110
AT3G53500_1	11.7807	22.136	0.532196	1.47673e-05	0.000324013
AT3G53580_1	11.4509	22.9951	0.497971	2.03537e-07	6.92423e-06
AT3G53740_1	5.55356	11.3669	0.488572	3.26841e-27	1.36541e-24
AT3G53870_1	8.62132	15.411	0.559427	1.98843e-10	1.14105e-08
AT3G53920_1	5.11615	8.68348	0.589181	0.00716813	0.0464705
AT3G54080_3	4.45465	10.5406	0.422617	0.00139535	0.0132537
AT3G54110_1	7.80552	11.8355	0.659501	0.00512357	0.0359614
AT3G54470_1	7.30827	14.4473	0.505856	5.91833e-06	0.000147873
AT3G54620_1	6.40921	15.484	0.413926	0.00116101	0.0115043
AT3G55010_1	2.16517	4.32902	0.500152	0.00276255	0.0224181
AT3G55170_1	2.38334	5.11053	0.466359	0.00171419	0.0157141
AT3G55330_1	5.16282	9.29788	0.555268	5.54057e-07	1.74821e-05
AT3G55410_1	10.6977	17.4932	0.611532	0.00110448	0.0110623
AT3G55460_1	10.9343	24.3908	0.448295	1.0093e-07	3.5854e-06
AT3G55620_1	8.3421	13.7049	0.608695	0.00565301	0.0385882
AT3G55750_2	4.65723	9.27096	0.502346	9.0645e-08	3.28714e-06
AT3G55760_3	3.70956	2.16421	1.71405	2.58058e-05	0.000511416
AT3G55770_2	5.77292	8.87825	0.650232	0.00153505	0.0143312
AT3G56040_1	4.18912	8.34517	0.501981	0.00062186	0.0070218
AT3G56090_1	5.32661	16.6956	0.319044	4.79372e-13	4.20719e-11
AT3G56190_1	9.48067	16.8802	0.561645	2.11019e-07	7.11094e-06
AT3G56310_1	8.13788	17.2029	0.473052	0.000229276	0.00310578
AT3G56360_1	5.28834	3.2021	1.65152	1.13657e-11	8.13037e-10
AT3G56490_2	7.57122	13.2831	0.56999	0.00719352	0.0465484
AT3G56680_1	5.55226	11.2805	0.492201	0.000497322	0.00583598
AT3G57290_1	8.13773	14.1681	0.574369	7.76006e-05	0.00124495
AT3G57785_1	5.54038	8.59567	0.644555	0.00328907	0.0256542
AT3G57870_1	4.76137	8.13528	0.585274	8.96715e-05	0.0014062
AT3G58010_1	13.5065	27.4849	0.491415	0.00544987	0.0374957
AT3G58120_1	2.89454	1.8454	1.56851	0.000909089	0.00941918
AT3G58130_1	13.978	24.0366	0.581529	0.00135193	0.0129569
AT3G58500_1	7.63283	16.9481	0.450365	1.15498e-08	4.89326e-07
AT3G58560_1	4.11508	8.49898	0.484185	0.00191721	0.0170702
AT3G58610_1	4.9345	7.51428	0.656683	3.12654e-11	2.06669e-09
AT3G58680_1	6.0173	9.32911	0.645003	0.000271169	0.00353129
AT3G58730_1	12.4949	21.5025	0.581089	0.00528896	0.0367517
AT3G58760_1	10.5286	34.5548	0.304692	0.0072048	0.0465738
AT3G59300_2	8.43324	15.6692	0.538205	7.17521e-06	0.000174113
AT3G59310_1	6.59159	12.0058	0.549033	1.13021e-06	3.33444e-05
AT3G59540_1	5.73232	12.4771	0.459428	4.71341e-13	4.17177e-11
AT3G59600_1	3.45091	6.18339	0.558094	0.00459506	0.0333965
AT3G59780_1	4.70907	7.2519	0.649356	0.000544236	0.00625302
AT3G59810_1	4.735	10.2412	0.462349	0.00104489	0.0105847
AT3G59820_3	5.13031	2.38054	2.15511	0.00106087	0.0107257
AT3G59920_1	21.5748	39.5702	0.545229	0.00611648	0.0411601
AT3G60190_1	7.81586	13.4103	0.582825	0.00125417	0.0122074
AT3G60370_1	7.87443	12.7905	0.615645	0.00504132	0.035696
AT3G60440_1	6.51057	15.0977	0.431229	0.00262529	0.0215554
AT3G60770_1	6.66939	12.2858	0.542853	6.09093e-17	8.59645e-15
AT3G60810_1	16.7134	34.8512	0.479565	3.39482e-05	0.000633134
AT3G60820_1	13.5736	25.0252	0.542398	4.76576e-05	0.000832462
AT3G61080_1	6.82944	12.4302	0.549423	0.00372802	0.0283373
AT3G61240_2	9.50746	24.5243	0.387675	9.66736e-09	4.18738e-07
AT3G61420_1	8.48599	18.7513	0.452556	0.00465417	0.0337102
AT3G61470_1	5.12259	7.72936	0.662744	8.06632e-22	1.8721e-19
AT3G61870_2	7.08682	11.894	0.595833	1.1479e-06	3.36759e-05
AT3G62030_1	7.76189	14.7154	0.527467	2.27817e-74	3.96553e-71
AT3G62400_1	8.03039	12.4827	0.64332	0.0021846	0.0189031
AT3G62530_1	7.36408	12.1966	0.603784	4.716e-07	1.50623e-05
AT3G62560_1	5.2244	13.3353	0.391772	2.22457e-05	0.000452893
AT3G62750_1	4.29521	8.29484	0.517818	0.00464157	0.0336642
AT3G62790_1	6.96023	14.214	0.489676	1.00435e-05	0.00023003
AT3G62840_1	2.92305	4.9579	0.589574	0.000136415	0.00198705
AT3G62910_1	6.62946	11.01	0.602132	0.000352364	0.00434485
AT3G63400_2	8.18206	16.1395	0.506959	0.00028439	0.00366236
AT3G63420_1	6.65615	12.4959	0.532668	0.0026146	0.0215015
AT3G63490_1	5.84601	9.13288	0.640105	2.65494e-18	4.4013e-16
AT3G63520_1	8.57309	13.3538	0.641995	8.13793e-06	0.000191857
AT3G63540_2	3.53575	2.27455	1.55448	7.63964e-06	0.000182125
AT4G00100_1	7.70795	12.8742	0.598712	1.86863e-11	1.29245e-09
AT4G00370_1	7.16645	11.9273	0.600844	3.8807e-05	0.0007
AT4G00570_1	5.56871	9.02292	0.617174	0.00396164	0.029745
AT4G00585_1	4.91515	10.4534	0.470196	4.86574e-07	1.54932e-05
AT4G00860_1	5.11912	9.5818	0.534255	4.03756e-14	3.97814e-12
AT4G01100_1	7.83572	17.4532	0.448955	3.71965e-05	0.000676794
AT4G01330_1	2.67753	1.70307	1.57218	0.00689757	0.0451514
AT4G01560_1	6.19549	16.9511	0.365491	0.00501606	0.0355653
AT4G01690_1	5.55961	9.39623	0.591685	1.79426e-05	0.000382433
AT4G01810_1	4.33618	11.9304	0.363457	0.00178316	0.0161521
AT4G02080_1	8.11119	16.9518	0.478485	8.94693e-05	0.00140514
AT4G02120_1	8.03182	17.6946	0.453914	0.00579411	0.0393201
AT4G02220_2	6.9277	22.3523	0.309932	0.00119259	0.0117424
AT4G02260_2	7.68438	15.6673	0.490474	0.000717655	0.0078731
AT4G02570_1	8.05938	16.4807	0.48902	7.65537e-06	0.000182125
AT4G02580_1	10.2879	18.1809	0.565865	3.77953e-06	9.89309e-05
AT4G02600_1	7.45053	16.4132	0.453936	0.00752423	0.0478873
AT4G02610_1	10.3799	26.1786	0.396502	7.56818e-05	0.00121978
AT4G02620_1	3.99269	7.4346	0.537042	7.55824e-10	3.88858e-08
AT4G02790_1	7.59912	14.1789	0.535947	0.000316804	0.00397681
AT4G03520_1	8.32687	12.8312	0.648954	3.74373e-11	2.45909e-09
AT4G04320_1	5.62431	14.1748	0.396784	8.27358e-12	6.08516e-10
AT4G04330_1	5.29109	13.7162	0.385754	1.79423e-12	1.45263e-10
AT4G04340_1	4.32329	12.3392	0.350369	3.04472e-11	2.02542e-09
AT4G04470_1	7.20937	15.5002	0.465116	0.000228756	0.00310578
AT4G04720_1	9.97328	27.5349	0.362205	0.000308847	0.00390775
AT4G04890_1	5.38428	13.0278	0.41329	6.6034e-05	0.00109296
AT4G04910_1	10.5758	25.2884	0.418209	9.0116e-05	0.00140928
AT4G05090_1	3.80669	6.66369	0.571259	0.00455093	0.0331681
AT4G08280_2	10.9844	23.0085	0.477405	0.000961585	0.00988464
AT4G08390_2	7.83271	12.1137	0.646599	5.17675e-05	0.000893652
AT4G08520_1	8.71155	17.4563	0.49905	2.08505e-08	8.4404e-07
AT4G09000_1	4.8421	9.93111	0.487569	4.847e-38	4.60201e-35
AT4G09010_1	2.76426	5.2635	0.525174	3.19493e-24	1.01115e-21
AT4G09020_1	5.0576	9.83656	0.514164	3.09191e-06	8.21029e-05
AT4G09730_3	3.40945	2.17941	1.56439	9.61063e-05	0.00148481
AT4G09730_4	4.7293	7.52507	0.628472	0.00153872	0.0143486
AT4G09750_1	4.5495	12.7997	0.355437	0.00139969	0.0132774
AT4G09800_1	7.92046	12.2046	0.648975	5.57229e-10	2.96923e-08
AT4G10080_1	5.76686	8.96474	0.643283	0.000968872	0.00993998
AT4G10300_1	7.89933	13.4193	0.588653	3.34298e-12	2.60553e-10
AT4G10610_1	6.62616	11.5748	0.572463	0.00715304	0.0464015
AT4G10790_2	4.22498	2.63083	1.60595	0.000302301	0.00384091
AT4G10920_1	5.1185	10.3284	0.495577	3.95507e-06	0.000102498
AT4G11010_1	4.27329	10.1237	0.422107	5.77878e-19	1.05883e-16
AT4G11150_2	8.63568	13.7507	0.628018	1.77646e-05	0.000380191
AT4G11380_1	5.50201	10.1838	0.540269	0.00505067	0.0357086
AT4G11420_1	5.17524	8.78634	0.58901	0.00220845	0.0190936
AT4G11600_1	4.42081	10.9268	0.404585	2.81984e-18	4.60163e-16
AT4G11740_2	3.88819	1.69363	2.29578	0.00553741	0.0379979
AT4G12060_1	4.25374	8.05366	0.528175	0.00309636	0.0243695
AT4G12230_1	4.33827	8.32729	0.520971	0.0043617	0.0321026
AT4G12590_1	8.61225	12.8791	0.6687	0.00563158	0.0384923
AT4G12600_1	7.0742	11.8699	0.595979	4.20254e-05	0.000748998
AT4G12720_1	3.4719	10.5222	0.32996	1.40733e-06	4.03795e-05
AT4G12790_1	3.67608	6.40874	0.573604	0.000810999	0.00864293
AT4G12830_1	5.68229	9.87541	0.575398	0.000114515	0.00173081
AT4G13010_1	8.58024	16.7775	0.511412	0.00194805	0.0172221
AT4G13170_3	3.2031	5.46851	0.585735	0.00240047	0.0202672
AT4G13200_1	5.59124	8.97611	0.622903	0.00119376	0.0117424
AT4G13360_1	7.62162	15.5159	0.491214	0.00348214	0.0269588
AT4G13520_1	4.81304	8.67656	0.554718	0.0022436	0.0193335
AT4G13530_2	5.58428	10.142	0.550612	0.00185906	0.0166804
AT4G13590_1	9.65573	16.0322	0.602272	0.000234551	0.0031527
AT4G14160_1	8.59949	16.3159	0.527062	0.000553289	0.00633613
AT4G14210_1	7.43734	13.5881	0.547342	4.09161e-05	0.000730475
AT4G14240_2	3.17044	7.24728	0.437466	0.00167093	0.015389
AT4G14320_1	5.47477	9.04492	0.605287	4.0004e-09	1.84054e-07
AT4G14615_1	10.6819	19.7388	0.541165	0.00010935	0.00166238
AT4G14710_1	6.75732	12.2441	0.551886	4.69222e-05	0.000822241
AT4G14716_1	6.67212	12.2554	0.544422	3.1403e-05	0.000600683
AT4G14800_1	5.89729	10.5378	0.559631	0.00732458	0.0470756
AT4G14870_1	5.71935	3.7407	1.52895	4.58709e-07	1.46956e-05
AT4G15000_1	5.71134	9.5562	0.597658	1.71375e-06	4.85052e-05
AT4G15560_1	4.36289	7.4752	0.583648	4.65316e-09	2.12217e-07
AT4G15802_1	9.78185	45.6924	0.214081	0.00764248	0.048316
AT4G15930_2	5.77538	11.9222	0.484421	3.86743e-05	0.000698813
AT4G15940_1	10.4695	23.6369	0.44293	0.00722159	0.0466433
AT4G16146_1	4.82351	7.27518	0.663009	0.00682503	0.0447743
AT4G16390_2	3.51236	8.36709	0.419783	9.01967e-05	0.00140928
AT4G16450_1	6.65224	11.5891	0.57401	2.03984e-06	5.66598e-05
AT4G16720_1	4.18016	6.65409	0.62821	3.30303e-14	3.38204e-12
AT4G16830_2	3.59624	9.27368	0.38779	9.17064e-06	0.000212368
AT4G17100_2	3.57269	1.91151	1.86905	5.42835e-13	4.72448e-11
AT4G17270_1	6.64436	13.7396	0.483594	0.00269015	0.0220188
AT4G17370_1	4.23879	6.85371	0.618467	0.00400677	0.0299977
AT4G17560_1	7.86834	11.913	0.660484	6.64788e-05	0.00109858
AT4G17830_1	9.60088	16.266	0.590243	0.00293858	0.0233388
AT4G18810_1	8.55421	15.5425	0.550376	0.000105387	0.00161151
AT4G19110_1	6.14547	9.57276	0.641975	0.000979173	0.0100069
AT4G19160_1	8.06388	15.7446	0.51217	0.00613199	0.0412114
AT4G19350_1	4.97436	8.27818	0.6009	0.00180216	0.0162537
AT4G19640_1	6.6015	11.4429	0.576908	0.000708693	0.00780758
AT4G19830_1	3.91685	7.6441	0.512402	0.00238042	0.0201305
AT4G20150_1	6.72501	11.477	0.585955	1.0024e-09	5.05753e-08
AT4G20260_1	3.41921	2.2407	1.52595	1.48525e-25	5.53997e-23
AT4G20410_1	7.5082	13.6954	0.548228	0.00199966	0.0175943
AT4G20850_1	3.81786	6.11157	0.624694	0.00680732	0.0447143
AT4G21105_1	7.6538	12.2272	0.625967	3.71919e-08	1.42806e-06
AT4G21110_1	9.32706	26.9391	0.346228	1.61357e-06	4.57937e-05
AT4G21150_1	10.3226	21.7554	0.474485	0.00151931	0.0142311
AT4G21210_1	4.37021	8.05379	0.542628	8.0539e-10	4.10317e-08
AT4G21790_1	6.02832	9.95267	0.605698	0.000235289	0.00315855
AT4G21860_1	5.51763	11.2976	0.488391	2.41585e-05	0.000484283
AT4G22220_1	8.0934	13.4447	0.601976	2.65531e-09	1.26055e-07
AT4G22260_1	8.21418	15.5998	0.526558	0.00705181	0.0459446
AT4G22670_3	8.23358	13.2475	0.621521	8.10489e-05	0.00129233
AT4G22740_2	5.8033	3.83376	1.51374	0.00433244	0.0319774
AT4G22930_1	14.2964	28.4979	0.501664	0.00116734	0.0115451
AT4G23460_1	6.83507	15.2109	0.449355	0.00758011	0.0481257
AT4G23470_1	5.66947	9.91724	0.571678	4.67381e-06	0.00011964
AT4G23570_1	3.43916	2.26379	1.5192	0.00383262	0.0289637
AT4G23620_1	3.95388	11.0056	0.35926	0.00478047	0.0342958
AT4G23710_1	7.30471	12.413	0.58847	4.46622e-05	0.000789258
AT4G23800_2	5.41737	3.18102	1.70303	1.80039e-08	7.34502e-07
AT4G24460_1	5.54304	9.67422	0.572971	0.00411405	0.0305816
AT4G24750_1	13.2921	21.2559	0.625338	0.00661128	0.0436737
AT4G25050_1	4.38785	9.04793	0.484956	5.58216e-45	6.47778e-42
AT4G25080_3	3.3832	6.39282	0.529218	3.1434e-09	1.47218e-07
AT4G25100_1	2.06009	3.12556	0.659111	1.9435e-07	6.65504e-06
AT4G25370_1	7.82771	12.9449	0.604696	1.17865e-10	6.99422e-09
AT4G25570_1	4.67448	7.53867	0.620067	0.000218133	0.0029976
AT4G25660_2	5.26807	9.09821	0.579023	0.00507571	0.0357938
AT4G25970_1	10.5856	19.3865	0.54603	0.0057576	0.0391487
AT4G26130_1	6.06464	3.82866	1.58401	4.99339e-05	0.000863427
AT4G26230_1	4.02606	2.55184	1.5777	4.71405e-19	8.95155e-17
AT4G26230_2	3.111	4.8841	0.636966	0.000272641	0.00353722
AT4G26300_1	11.3287	29.3577	0.385886	1.63154e-05	0.000353522
AT4G26370_1	4.09012	7.99275	0.511729	1.30406e-06	3.78323e-05
AT4G26555_1	5.34372	10.9158	0.48954	2.12932e-09	1.04393e-07
AT4G26670_1	3.34236	7.29703	0.458043	4.23151e-11	2.72802e-09
AT4G26710_1	9.56839	20.5526	0.465557	2.3589e-12	1.88064e-10
AT4G26870_1	5.47809	11.0602	0.495299	0.000152669	0.00219625
AT4G27130_1	7.64978	13.3275	0.573986	3.85382e-06	0.000100623
AT4G27500_4	7.57466	12.1489	0.623488	0.00077403	0.00833399
AT4G27800_1	11.2589	23.6348	0.476369	3.1504e-10	1.77853e-08
AT4G27820_1	8.84776	24.4205	0.362309	7.73815e-07	2.34253e-05
AT4G27960_1	2.7059	4.29234	0.630401	0.00123389	0.0120324
AT4G28030_1	4.2081	6.8229	0.616761	0.00225216	0.0193593
AT4G29010_1	5.68304	9.61564	0.59102	0.00754824	0.0479817
AT4G29040_1	6.85553	3.77916	1.81404	7.39374e-09	3.28596e-07
AT4G29040_2	7.36596	11.5348	0.638588	0.00527652	0.0366897
AT4G29350_1	4.32027	2.64562	1.63299	4.18632e-11	2.71565e-09
AT4G29350_2	4.91679	7.68889	0.639466	9.32017e-08	3.35119e-06
AT4G29380_2	2.89631	4.95464	0.584565	1.36987e-07	4.73741e-06
AT4G29390_1	2.84652	4.82255	0.590253	2.10561e-07	7.11094e-06
AT4G29410_1	6.9261	12.302	0.563005	1.80256e-09	8.96471e-08
AT4G29590_1	8.1248	13.0921	0.620588	0.000942447	0.00970702
AT4G29900_1	10.9531	19.5816	0.559355	0.00214311	0.0186211
AT4G30210_3	4.0865	8.13453	0.502365	1.78154e-05	0.0003805
AT4G30220_1	4.21346	6.96908	0.604593	9.08916e-05	0.00141682
AT4G30530_1	2.56699	3.86148	0.66477	0.0055331	0.0379933
AT4G30600_1	6.14449	13.9913	0.439165	0.000166256	0.00235601
AT4G30950_1	7.52706	12.9534	0.581088	1.99646e-11	1.36281e-09
AT4G31040_1	7.16836	12.9577	0.553211	9.75128e-05	0.0015021
AT4G31300_1	11.5687	18.0834	0.639742	0.00509355	0.0358471
AT4G31390_1	8.97459	17.7049	0.506898	0.00502796	0.0356255
AT4G31720_1	7.97738	15.382	0.518618	0.000760681	0.00821567
AT4G31820_2	3.30908	1.58953	2.08179	0.000117928	0.0017696
AT4G31990_1	8.58237	14.3411	0.598446	7.06903e-07	2.16507e-05
AT4G32060_1	3.88558	6.78512	0.572662	0.00123315	0.0120324
AT4G32130_1	13.7754	27.6926	0.497439	0.0015003	0.0141163
AT4G32150_1	4.61463	7.08401	0.651416	0.00727083	0.0468064
AT4G32180_1	7.26603	14.8036	0.490829	0.00779213	0.0491728
AT4G32260_1	4.81838	2.38027	2.0243	3.49899e-79	7.30869e-76
AT4G32340_1	5.34917	11.9066	0.449262	5.28455e-16	6.8138e-14
AT4G32340_2	2.2993	1.47549	1.55833	4.9453e-10	2.6623e-08
AT4G32470_1	7.27303	11.2596	0.645939	2.90334e-08	1.13568e-06
AT4G32520_1	7.92009	13.3996	0.591071	0.000878202	0.00918113
AT4G32530_1	6.01681	9.69976	0.620305	6.37777e-05	0.00106235
AT4G32915_1	10.2719	17.3788	0.591059	0.00157751	0.0146449
AT4G33090_1	7.61504	13.4793	0.564945	0.00025981	0.00343042
AT4G33360_1	3.50708	9.30671	0.376834	0.000749315	0.00811809
AT4G33380_1	10.9212	24.3595	0.448334	8.59703e-05	0.00136455
AT4G33510_2	4.45285	8.60378	0.517546	1.90519e-11	1.30906e-09
AT4G33520_1	8.75376	16.3215	0.536332	0.000528366	0.00609556
AT4G33540_1	10.1736	17.9628	0.566371	0.00341296	0.0264821
AT4G33625_1	5.31269	9.48741	0.559973	2.68741e-06	7.29022e-05
AT4G33650_2	7.23204	13.0847	0.552708	0.00154343	0.0143797
AT4G34090_1	6.82082	11.9198	0.572228	0.000269611	0.00352367
AT4G34180_1	8.22938	16.9947	0.484232	0.000324081	0.0040584
AT4G34270_1	7.89711	14.7455	0.535561	0.00593595	0.0401783
AT4G34290_1	3.91008	6.53897	0.597965	1.795e-08	7.34502e-07
AT4G34350_1	5.03148	9.6233	0.522843	6.21487e-05	0.00104019
AT4G34450_2	7.46574	14.9073	0.500811	1.37238e-06	3.94854e-05
AT4G34555_1	7.03025	16.8898	0.416242	0.00234302	0.0198858
AT4G34620_1	4.02149	6.53229	0.615632	8.44084e-15	9.08826e-13
AT4G34640_1	9.45848	15.6714	0.603552	0.00706885	0.0459982
AT4G34720_1	5.21409	8.43994	0.617787	7.84848e-09	3.47329e-07
AT4G35230_1	13.8736	22.3485	0.620784	0.00292082	0.0232863
AT4G35250_1	9.3364	16.5025	0.565757	0.0002371	0.00317879
AT4G35360_1	3.65631	7.35886	0.496857	0.00102348	0.0104082
AT4G35450_1	3.96567	6.5939	0.601415	1.72255e-08	7.16745e-07
AT4G35790_1	7.03222	19.0629	0.368896	2.39145e-08	9.48705e-07
AT4G35830_1	6.92526	14.9416	0.46349	1.18243e-18	2.05822e-16
AT4G35850_1	6.97211	14.3094	0.487241	0.00121433	0.0119128
AT4G35860_1	7.12791	14.164	0.503242	0.00283343	0.0228513
AT4G35880_1	4.29253	9.21881	0.465627	0.00763883	0.048316
AT4G35890_1	8.52301	15.5	0.549872	0.00266712	0.0218474
AT4G36195_1	15.493	29.4619	0.525864	0.00471394	0.0340473
AT4G36210_1	7.91974	13.3816	0.59184	0.000468612	0.00555526
AT4G36530_1	4.53123	7.8363	0.578235	0.00246508	0.020592
AT4G36720_1	10.8251	18.7619	0.576975	0.00365185	0.0279167
AT4G36730_1	10.1416	16.8193	0.602972	0.0051994	0.0363228
AT4G36760_1	6.53724	15.4658	0.422689	1.82449e-05	0.000388086
AT4G36910_1	7.06034	16.1641	0.436791	5.78023e-05	0.000983204
AT4G36960_2	6.67844	16.2473	0.411049	0.000835786	0.00884392
AT4G37280_2	2.81856	1.69253	1.6653	0.000512298	0.00595818
AT4G37450_1	3.30581	1.94596	1.6988	3.44193e-05	0.000639635
AT4G38510_1	7.35615	16.921	0.434735	9.62373e-07	2.87172e-05
AT4G38550_1	3.13007	2.0787	1.50578	9.33738e-08	3.35119e-06
AT4G38680_1	2.88917	4.69363	0.615552	3.48857e-05	0.000643722
AT4G38680_2	4.96831	2.91078	1.70686	1.07773e-15	1.29377e-13
AT4G38790_1	5.93337	15.5833	0.380752	0.000159108	0.00226393
AT4G38920_1	7.84169	13.1341	0.597048	6.28269e-16	7.71958e-14
AT4G39080_1	11.9041	27.1248	0.438863	6.07888e-16	7.64914e-14
AT4G39260_1	2.92842	1.87542	1.56147	3.65283e-22	9.53754e-20
AT4G39710_1	5.37706	9.19627	0.584701	3.64536e-05	0.000666762
AT4G39850_1	8.62452	17.9974	0.479209	0.00252647	0.0209813
AT5G01350_1	6.22671	10.9723	0.567494	6.93761e-05	0.00113925
AT5G01750_3	2.30878	3.66672	0.629658	0.000683844	0.00758181
AT5G01800_1	6.94629	12.9793	0.535183	0.000795163	0.00849149
AT5G02450_2	8.78224	13.2237	0.664129	1.18853e-05	0.000266374
AT5G02610_1	2.55874	6.09998	0.419466	2.65249e-07	8.8225e-06
AT5G02770_1	3.4617	7.71342	0.448789	2.79338e-05	0.000547356
AT5G02790_1	9.63898	17.1027	0.563593	2.56636e-07	8.59072e-06
AT5G02870_2	3.54468	6.6701	0.531428	1.83848e-17	2.86584e-15
AT5G03380_2	6.1574	3.85528	1.59713	0.00379164	0.0287458
AT5G03460_1	9.52278	17.4467	0.545822	5.94777e-05	0.00100678
AT5G03520_1	6.94191	13.9719	0.496849	0.00127925	0.0123594
AT5G03650_1	12.4052	19.9749	0.621041	0.00560168	0.0383381
AT5G03850_1	5.95592	9.40365	0.633363	1.18275e-06	3.46012e-05
AT5G03880_1	7.98159	18.4263	0.433162	1.06825e-26	4.29109e-24
AT5G04250_1	6.66702	11.9784	0.556586	0.00536728	0.0371723
AT5G04430_1	9.37805	18.7624	0.499833	6.04727e-05	0.00102197
AT5G04740_1	6.05201	13.6003	0.444991	3.24395e-10	1.8215e-08
AT5G05010_1	10.2484	15.829	0.647446	7.31751e-05	0.00118671
AT5G05190_1	9.29058	21.8919	0.424384	7.11589e-06	0.000173236
AT5G05200_1	6.15828	9.88744	0.622839	2.03137e-05	0.000425163
AT5G05690_1	4.16103	9.53072	0.436592	3.33673e-05	0.000626777
AT5G05740_1	5.07312	7.858	0.645599	0.0014665	0.0138232
AT5G05780_1	4.33188	13.0942	0.330824	7.34756e-06	0.000177224
AT5G06060_1	8.90108	19.1034	0.465941	0.00137307	0.0131082
AT5G06110_1	5.54729	10.4951	0.528557	0.000913567	0.00945619
AT5G06600_1	9.09304	14.9164	0.609601	0.000321025	0.00402495
AT5G08060_1	7.34251	12.3805	0.593068	4.60604e-05	0.000811041
AT5G08100_1	5.30464	11.9927	0.44232	0.00204849	0.0179484
AT5G08180_1	6.88954	11.829	0.58243	0.000733885	0.00801746
AT5G08270_1	6.6655	14.8639	0.448436	1.60722e-08	6.71432e-07
AT5G08380_1	7.78637	14.6604	0.531115	0.000518675	0.00601225
AT5G08410_1	3.11324	4.97103	0.626276	0.000481708	0.00567829
AT5G08530_1	6.87946	13.7119	0.501714	3.21047e-05	0.00060964
AT5G08690_1	13.5984	21.2657	0.639452	2.9306e-08	1.14206e-06
AT5G09330_1	3.10691	4.90707	0.63315	0.000379428	0.00464021
AT5G09900_1	7.02264	12.9055	0.544159	0.0032148	0.0251501
AT5G10360_1	5.26326	8.53349	0.616777	3.78889e-10	2.07179e-08
AT5G10450_1	10.0591	15.9571	0.630381	1.04313e-21	2.36836e-19
AT5G10470_1	7.15372	12.0263	0.594839	0.0023284	0.0197866
AT5G10550_2	2.88365	1.75537	1.64276	0.000480443	0.00566977
AT5G10780_1	8.2738	14.6919	0.563154	1.28396e-05	0.000284103
AT5G11150_1	7.7644	21.2807	0.364856	0.000310721	0.00391929
AT5G11170_1	6.36162	10.4042	0.611449	0.000280168	0.00362138
AT5G11200_1	7.63232	17.3641	0.439547	3.68365e-10	2.02484e-08
AT5G11260_2	4.7227	2.07384	2.27727	0.00224927	0.0193504
AT5G11480_1	7.94525	12.7613	0.622604	3.66797e-05	0.000669725
AT5G11520_1	3.84702	6.26498	0.614052	0.000650377	0.00729596
AT5G11550_1	4.78479	2.4604	1.94472	0.000332055	0.00413347
AT5G11880_1	7.57994	15.6764	0.483525	1.30346e-05	0.000287809
AT5G11910_1	4.22165	8.74666	0.482659	0.000337233	0.00418795
AT5G12130_1	9.02055	16.7328	0.539095	3.33387e-05	0.000626777
AT5G12140_1	5.04024	8.61995	0.584718	1.78047e-06	4.98532e-05
AT5G12150_1	12.9144	26.2955	0.491125	3.0024e-06	8.01972e-05
AT5G12240_1	6.45341	12.6572	0.509862	0.000812912	0.00865449
AT5G12370_1	5.13065	10.6777	0.480503	0.000546585	0.00627311
AT5G13020_1	6.93707	10.7939	0.642687	0.00070026	0.00773917
AT5G13030_3	8.06008	15.8203	0.509478	0.000203632	0.00282108
AT5G13190_1	6.69463	15.4814	0.432431	0.00110277	0.0110623
AT5G13240_1	8.19852	20.8997	0.392279	0.000611817	0.00693791
AT5G13280_1	10.9019	21.6127	0.504419	0.00206533	0.0180807
AT5G13410_1	8.54513	15.2162	0.56158	0.000447786	0.00535201
AT5G13510_2	3.5336	5.6699	0.623221	2.0033e-07	6.8374e-06
AT5G13520_1	4.52409	7.80001	0.58001	5.49185e-07	1.74337e-05
AT5G13630_1	3.49298	7.56783	0.461556	1.89821e-28	8.61952e-26
AT5G13850_2	2.71476	4.52787	0.599567	0.000242995	0.00323704
AT5G14060_1	3.2643	9.79002	0.333432	1.83763e-05	0.000390085
AT5G14270_1	8.25332	17.3027	0.476997	1.20619e-05	0.000269177
AT5G14320_2	4.41694	7.97095	0.55413	8.06939e-14	7.45811e-12
AT5G14520_2	2.50216	1.52648	1.63917	0.000663623	0.0074138
AT5G14640_1	6.85354	20.1347	0.340384	0.00711774	0.0462587
AT5G14780_2	3.93583	7.54984	0.521313	0.000129732	0.00191373
AT5G15320_1	9.86017	17.0803	0.577285	0.000479944	0.00566977
AT5G15610_1	9.42212	17.4482	0.540004	0.00457707	0.0333354
AT5G15650_1	3.5941	6.28692	0.571679	0.00015454	0.00221402
AT5G15750_1	12.8486	25.1429	0.511025	0.0044366	0.0324481
AT5G16050_1	8.49232	16.8494	0.504014	1.03172e-07	3.65264e-06
AT5G16390_1	6.08261	9.96518	0.610387	6.54623e-07	2.02875e-05
AT5G16620_2	8.41072	16.3577	0.514175	3.67137e-06	9.63412e-05
AT5G16715_1	12.334	28.2324	0.436876	2.07851e-05	0.000429012
AT5G16840_1	9.61084	20.0163	0.48015	0.00554191	0.0380038
AT5G16970_1	5.65112	9.33247	0.605533	0.00287426	0.0230736
AT5G17020_1	6.68952	13.0825	0.511333	0.000408036	0.00492662
AT5G17440_1	6.29159	3.90829	1.6098	0.000627359	0.00706811
AT5G17530_1	9.97796	17.1511	0.581766	0.00409027	0.0304482
AT5G17560_1	6.50442	11.4826	0.566459	3.49618e-05	0.000643987
AT5G17770_1	8.38732	13.1977	0.635515	0.000575872	0.00657312
AT5G17840_1	6.35002	14.9129	0.425808	0.000329847	0.00411088
AT5G17920_1	3.66449	6.13695	0.59712	1.60033e-23	4.64272e-21
AT5G18190_1	6.85661	12.3845	0.553646	0.00530037	0.0367821
AT5G18400_1	5.7847	13.4652	0.429603	0.000617248	0.00699191
AT5G18500_1	5.0565	10.3165	0.490138	3.47841e-05	0.000642982
AT5G18940_1	9.20673	17.6249	0.522371	0.00287979	0.0230933
AT5G19000_2	5.71961	9.31795	0.613827	0.00412412	0.0306128
AT5G19010_1	4.12428	10.3715	0.397656	3.90004e-05	0.000702277
AT5G19090_2	4.54317	2.99147	1.51871	0.000650173	0.00729596
AT5G19140_1	3.59925	6.72977	0.534824	4.16386e-17	6.21247e-15
AT5G19500_1	5.7983	8.99148	0.644867	3.4516e-09	1.60931e-07
AT5G19510_1	4.97197	7.51526	0.661583	2.56773e-09	1.23015e-07
AT5G19855_1	5.11885	9.47781	0.540088	0.000435919	0.00522103
AT5G20020_1	7.11563	10.8964	0.653028	0.00110475	0.0110623
AT5G20080_1	15.3295	26.16	0.585988	3.8397e-05	0.000695005
AT5G20140_1	7.74178	12.8641	0.601814	0.00208985	0.018219
AT5G20280_1	8.98538	15.6715	0.573357	6.92091e-06	0.000168883
AT5G20500_1	6.44303	12	0.536919	1.24498e-07	4.33418e-06
AT5G20510_1	3.78307	14.6915	0.2575	0.00231007	0.0196639
AT5G20570_1	6.41982	13.1472	0.488304	2.99174e-05	0.000580776
AT5G20730_1	7.33822	21.7208	0.337842	0.00569497	0.0387986
AT5G21090_1	7.87254	15.6364	0.503476	5.40372e-12	4.11945e-10
AT5G21274_1	11.2193	17.6972	0.633957	0.000434224	0.0052067
AT5G21326_1	12.305	27.8813	0.441334	0.00402296	0.0300542
AT5G21430_2	4.04798	6.11741	0.661715	0.00541309	0.0373904
AT5G22000_2	6.87245	12.2768	0.559791	0.00189523	0.0169322
AT5G22280_1	6.06492	14.4404	0.419996	0.0027219	0.022209
AT5G22340_1	3.44018	5.14875	0.668159	0.00625519	0.0418509
AT5G22640_2	5.06251	8.57454	0.590413	0.00115507	0.0114563
AT5G22830_2	8.9357	17.2873	0.516894	4.32126e-05	0.000766606
AT5G22840_1	10.6202	18.3577	0.578517	0.000679658	0.0075434
AT5G22880_1	5.44327	3.61998	1.50367	7.36469e-07	2.24247e-05
AT5G23040_1	7.46865	11.4283	0.65352	0.00273219	0.0222432
AT5G23290_1	11.9705	24.8757	0.481213	0.00330277	0.0257227
AT5G23450_1	5.90515	10.1087	0.584164	0.00150283	0.0141274
AT5G23540_1	8.14206	16.1256	0.504914	4.23076e-05	0.000752744
AT5G23890_2	3.98383	2.57129	1.54935	0.000155148	0.00221968
AT5G24300_1	6.90814	11.4029	0.605821	6.56197e-05	0.00108783
AT5G24490_2	6.73305	13.5696	0.496185	7.54854e-11	4.58354e-09
AT5G24500_1	8.9988	20.0011	0.449916	0.000526975	0.00608819
AT5G24620_2	6.96609	14.0829	0.49465	0.00745881	0.0476915
AT5G24650_1	4.47345	7.08453	0.631439	0.000406061	0.00490845
AT5G24660_1	4.65376	3.01989	1.54104	0.000510752	0.00594682
AT5G25080_1	6.77038	13.2791	0.509851	0.000501882	0.00586545
AT5G25757_1	5.52409	8.78512	0.6288	0.00636753	0.0424665
AT5G26360_1	14.1896	26.4853	0.535755	0.000203666	0.00282108
AT5G26570_3	4.62904	8.61628	0.537243	3.22636e-05	0.000611156
AT5G26667_2	2.92925	4.80185	0.610025	0.00667208	0.0439919
AT5G26742_2	2.79942	1.68384	1.66252	3.55354e-25	1.23711e-22
AT5G26830_1	4.58436	9.64073	0.47552	8.39713e-05	0.00133688
AT5G27290_1	5.28846	10.6617	0.496022	0.000404938	0.00490054
AT5G27390_1	4.25051	7.90668	0.537585	0.00543242	0.0374071
AT5G27430_1	6.73057	13.8136	0.487243	0.000664431	0.0074138
AT5G27470_1	8.75829	15.3115	0.572008	0.00543174	0.0374071
AT5G27540_1	9.87941	17.8661	0.552969	0.00505531	0.0357086
AT5G27700_1	10.1743	17.3247	0.58727	2.96964e-14	3.10149e-12
AT5G27730_1	7.34276	20.4371	0.359286	0.00463008	0.0336276
AT5G27760_1	4.172	8.25179	0.505587	0.00186873	0.0167384
AT5G27770_1	5.53221	12.1215	0.456397	9.25777e-18	1.46497e-15
AT5G28750_1	5.3422	8.11622	0.658213	1.08068e-07	3.77478e-06
AT5G33320_2	8.65691	14.3728	0.602311	2.04052e-05	0.000425372
AT5G34850_1	9.52383	16.5449	0.575636	1.92169e-05	0.000405457
AT5G35220_1	4.02447	6.3005	0.638754	0.000221538	0.00302056
AT5G35530_1	7.20971	12.4866	0.577398	9.34599e-07	2.79683e-05
AT5G35590_1	6.0894	10.5362	0.577951	6.43613e-07	2.00056e-05
AT5G36160_1	4.94675	9.03696	0.54739	0.00070303	0.00776157
AT5G36230_1	5.18997	9.6438	0.538167	4.64111e-06	0.000119095
AT5G36940_1	6.6002	17.0424	0.387281	0.00638618	0.0425126
AT5G37475_1	9.58712	18.1811	0.527312	0.00408977	0.0304482
AT5G38470_1	6.4517	11.046	0.584077	0.000192957	0.00268699
AT5G38480_1	6.96707	10.8663	0.641165	5.34729e-08	2.00169e-06
AT5G39510_1	6.12476	13.4308	0.456023	1.3619e-07	4.72548e-06
AT5G39570_2	7.6956	12.7861	0.601871	0.00319031	0.0250147
AT5G39590_1	8.02897	12.2887	0.653364	0.00246034	0.020592
AT5G40080_1	3.23944	5.38719	0.601322	0.00418633	0.0310085
AT5G40370_1	3.15578	9.10494	0.346601	5.57167e-22	1.35327e-19
AT5G40670_1	5.73223	10.7709	0.532197	0.00505076	0.0357086
AT5G40770_1	8.32645	13.0119	0.639908	0.00704001	0.0458963
AT5G40810_1	7.43635	14.7573	0.503909	0.000147844	0.00213862
AT5G40870_1	5.93802	13.9289	0.426309	0.00514518	0.0360646
AT5G41010_1	9.33556	16.8694	0.553401	0.00524098	0.0365156
AT5G41340_1	5.77936	10.0988	0.572281	0.00167242	0.0153892
AT5G41520_1	5.66082	8.62136	0.656604	0.000714061	0.00785844
AT5G41700_1	2.55867	4.82439	0.530361	6.75333e-14	6.41198e-12
AT5G41970_1	6.02762	10.1719	0.592576	0.00652787	0.043287
AT5G41990_1	2.1356	5.99231	0.35639	0.00194512	0.017216
AT5G42080_1	5.65052	9.56972	0.590458	9.99055e-07	2.97269e-05
AT5G42190_1	6.31595	11.2592	0.560962	0.000791398	0.00847729
AT5G42390_1	4.68993	10.1045	0.464142	5.65716e-14	5.42049e-12
AT5G42740_1	7.81511	12.1567	0.642867	1.06221e-05	0.00024222
AT5G42900_1	2.31947	3.96201	0.585429	0.000197189	0.00274226
AT5G42980_2	3.64599	7.7409	0.471004	6.04377e-25	1.97253e-22
AT5G43130_2	7.05093	4.37921	1.61009	0.00164971	0.0152205
AT5G43330_1	2.26349	4.17048	0.54274	0.00511734	0.0359419
AT5G43460_1	5.40712	9.53044	0.567352	0.00475895	0.0342303
AT5G43830_1	7.58087	13.8431	0.547627	1.05239e-07	3.70072e-06
AT5G43970_1	2.81375	4.95993	0.567296	0.00121754	0.011924
AT5G44340_1	5.17756	9.64977	0.536548	3.96846e-06	0.00010259
AT5G45030_2	3.69331	8.2068	0.450031	1.1934e-05	0.000266892
AT5G45130_1	8.15167	14.6661	0.555818	0.00465435	0.0337102
AT5G45400_1	7.85478	14.0704	0.55825	0.00137088	0.0130993
AT5G45410_1	6.96533	11.0965	0.627704	0.00453857	0.0331012
AT5G46420_1	10.0192	22.6556	0.442239	0.0013763	0.013127
AT5G46570_1	6.83016	16.6509	0.410199	0.00791108	0.0497731
AT5G47120_1	9.51551	16.8043	0.566253	0.0012665	0.012316
AT5G47180_1	5.56248	9.6195	0.57825	0.00359586	0.0276344
AT5G47200_1	6.7832	10.6801	0.635124	0.00404234	0.0301774
AT5G47210_2	3.35519	2.0929	1.60313	1.6755e-32	1.16659e-29
AT5G47240_1	2.9733	10.1295	0.29353	0.00289369	0.0231364
AT5G47770_2	4.96679	10.1891	0.48746	0.000116354	0.00175101
AT5G47780_1	6.37576	13.4875	0.472716	1.93631e-05	0.000406081
AT5G47840_1	9.02629	17.5644	0.513896	2.67435e-11	1.79044e-09
AT5G47930_1	10.3973	16.4891	0.630559	0.000126174	0.00186652
AT5G48150_1	2.13103	6.3066	0.337904	0.00639585	0.0425196
AT5G48220_2	7.30931	14.2498	0.512943	1.68235e-05	0.000363777
AT5G48230_1	9.52161	20.3651	0.467545	1.243e-05	0.000276799
AT5G48250_1	3.02811	7.49876	0.403815	0.000152652	0.00219625
AT5G48760_1	2.48029	4.51228	0.549675	9.13289e-05	0.0014194
AT5G48790_1	5.59773	10.2302	0.547177	0.000290797	0.00372191
AT5G49030_1	7.58138	12.7785	0.59329	2.37936e-05	0.000478806
AT5G49510_1	9.58589	19.2072	0.499077	0.000275784	0.00357356
AT5G49760_2	4.527	8.62879	0.524639	0.00013967	0.00203163
AT5G49810_1	6.13958	12.8553	0.47759	0.000786945	0.00844692
AT5G50810_1	4.65403	7.58237	0.613797	0.00100508	0.010251
AT5G50850_1	8.26343	13.1945	0.626279	0.000242806	0.00323704
AT5G51010_1	7.09777	12.7257	0.557751	1.1761e-08	4.95289e-07
AT5G51020_1	7.54325	12.209	0.617843	2.81031e-06	7.56467e-05
AT5G51120_1	7.11545	4.52649	1.57196	2.51406e-05	0.00050013
AT5G51200_1	6.51798	14.8512	0.438885	0.00499875	0.0354666
AT5G51820_1	4.40074	6.707	0.656141	0.000120832	0.00180282
AT5G52310_3	5.45398	3.61959	1.50679	5.95927e-06	0.000148541
AT5G52470_1	2.89386	1.67383	1.72889	6.88221e-10	3.57601e-08
AT5G52470_2	3.12913	6.66349	0.469593	5.40257e-11	3.41966e-09
AT5G52520_1	4.99732	9.3167	0.536383	0.00299854	0.0237248
AT5G52840_1	8.18988	13.3031	0.615638	0.000453606	0.00540806
AT5G53140_1	10.8789	16.3233	0.666463	0.000244479	0.00325266
AT5G53300_1	4.70534	7.16969	0.656283	1.32451e-12	1.08072e-10
AT5G53340_1	7.71096	16.9448	0.455064	0.00639073	0.0425126
AT5G53490_1	6.22938	10.3022	0.604663	7.56523e-19	1.34526e-16
AT5G53560_1	9.11453	15.0174	0.606933	1.25587e-05	0.000279069
AT5G53850_1	3.73521	6.21758	0.60075	0.000132731	0.00194971
AT5G54290_1	6.86357	10.8347	0.633482	0.00284828	0.0229356
AT5G54430_1	8.1632	14.8791	0.548634	0.000102549	0.00157503
AT5G54540_1	5.82523	8.91702	0.65327	0.00425162	0.0314475
AT5G54760_1	6.63006	12.2149	0.542783	3.10123e-05	0.00059539
AT5G54900_1	5.47901	11.3514	0.482671	0.00412139	0.0306128
AT5G55070_1	10.7715	18.4456	0.583962	0.00244401	0.0205022
AT5G55160_1	6.50334	10.7883	0.602815	7.33047e-06	0.000177221
AT5G55190_1	8.40756	13.1065	0.641481	0.00101964	0.010389
AT5G55220_1	7.09097	12.4632	0.568954	3.30283e-10	1.83774e-08
AT5G55280_1	3.48794	6.51805	0.535121	0.000338689	0.00420085
AT5G55290_1	7.54036	13.0929	0.575913	0.00746183	0.0476915
AT5G55660_2	10.1793	17.3062	0.588189	0.0022653	0.0194403
AT5G55670_2	3.16902	1.566	2.02363	0.000312911	0.0039374
AT5G55850_1	3.32476	5.0872	0.653555	0.00024597	0.00326833
AT5G56010_1	11.6686	7.63206	1.52889	3.51122e-10	1.94028e-08
AT5G56360_1	10.073	17.7277	0.568209	0.00194319	0.0172134
AT5G56680_1	3.55839	7.25275	0.490626	0.00290357	0.0231842
AT5G56940_1	4.62268	8.85829	0.521848	0.00115107	0.0114284
AT5G57030_1	12.6106	22.089	0.570897	0.000851989	0.00898805
AT5G57035_2	12.2144	20.4831	0.596314	0.00114453	0.0113951
AT5G57040_1	8.71555	13.8176	0.630759	0.000109085	0.00166076
AT5G57110_1	8.67894	15.2421	0.569405	1.77042e-05	0.000379677
AT5G57290_1	2.68976	1.51377	1.77686	9.0906e-20	1.75819e-17
AT5G57345_1	4.01751	7.69743	0.521929	2.27827e-08	9.15163e-07
AT5G57870_1	4.98721	7.74907	0.643588	0.000458236	0.00545082
AT5G57930_1	4.71116	7.94558	0.592929	0.000162058	0.00230277
AT5G58030_1	11.1063	23.8133	0.466392	3.71095e-05	0.000676391
AT5G58060_1	8.09547	13.2141	0.612639	0.00194232	0.0172134
AT5G58070_1	8.43356	13.6424	0.618186	0.00261452	0.0215015
AT5G58070_2	4.13262	2.60357	1.58729	0.00273388	0.0222432
AT5G58375_1	3.19437	6.23207	0.51257	0.00638711	0.0425126
AT5G58490_2	8.63399	16.2765	0.530456	0.00515051	0.0360778
AT5G58710_1	13.8652	22.9329	0.604599	0.000704929	0.00777432
AT5G58740_1	8.94844	18.5479	0.482451	0.000515967	0.00599417
AT5G58970_1	5.62884	16.1351	0.348858	0.00280847	0.022685
AT5G59160_1	5.3031	9.81614	0.540242	0.00314842	0.024742
AT5G59850_1	3.39413	6.06198	0.559904	8.66711e-07	2.60862e-05
AT5G59910_1	3.56995	2.07156	1.72332	1.53748e-20	3.08798e-18
AT5G60410_1	4.90846	8.01285	0.612573	0.00727339	0.0468064
AT5G60640_1	5.61606	9.11541	0.616106	7.19833e-05	0.00117328
AT5G61020_1	4.43206	7.13851	0.620867	0.0023271	0.0197866
AT5G61170_1	3.82475	6.62792	0.577067	1.06279e-10	6.37919e-09
AT5G61790_2	2.73769	1.54119	1.77635	1.06437e-16	1.44368e-14
AT5G62190_2	3.58638	2.33801	1.53394	0.000454998	0.00541847
AT5G62440_2	6.71208	3.11705	2.15334	1.2051e-06	3.51565e-05
AT5G62540_1	4.15524	8.88471	0.467685	2.42219e-05	0.000484624
AT5G62840_1	8.18603	15.6089	0.524446	0.00428031	0.031615
AT5G63400_1	5.25612	8.0405	0.653706	2.16233e-06	5.97443e-05
AT5G63420_3	10.2877	19.2435	0.534607	0.00221869	0.0191504
AT5G63510_1	6.5512	12.6565	0.517617	0.00191622	0.0170702
AT5G63860_1	10.8657	26.2384	0.414113	1.06699e-07	3.73948e-06
AT5G64050_1	8.89355	16.8526	0.527725	2.04771e-05	0.000426022
AT5G64350_1	5.74792	12.987	0.442589	4.76934e-25	1.60681e-22
AT5G65010_1	3.65307	5.678	0.643373	0.00520593	0.0363441
AT5G65050_2	6.19225	13.0861	0.473195	0.000854996	0.00900159
AT5G65060_1	8.19685	18.0923	0.453059	0.00538798	0.0372662
AT5G65260_1	12.7775	32.4824	0.393366	0.000158039	0.00225486
AT5G65430_1	3.75567	6.00989	0.624915	7.48022e-06	0.000179182
AT5G65780_7	5.86117	10.8125	0.542073	0.00493952	0.035118
AT5G65810_1	4.17531	7.12852	0.585718	0.00696888	0.0454885
AT5G65840_1	6.1799	10.9394	0.564922	0.000735823	0.0080263
AT5G66120_1	8.89734	18.9674	0.469087	3.11437e-05	0.000596816
AT5G66240_1	5.91957	11.7774	0.50262	0.000645641	0.00725842
AT5G66380_1	4.85167	9.45973	0.512876	0.000229002	0.00310578
AT5G66680_1	9.82901	16.049	0.612439	0.000277201	0.00358747
AT5G67560_1	8.76337	15.9821	0.548323	0.000154118	0.00221402
AT5G67590_1	7.24142	15.6775	0.461898	0.000116825	0.00175557

## Sheet: F1CL vs F1LC
Peak	Enrichment		Ratio	pvalue	padj
	F1CL	F1LC
AT2G47110_1	3.47528	5.62217	0.618138	1.26747e-05	0.00439653
AT5G38720_1	1.84012	17.0255	0.10808	6.33145e-10	6.38901e-07
