# Supplementary material for: Transcriptome-Wide Analysis of RNA m6A Methylation and Gene Expression Changes Among Two Arabidopsis Ecotypes and Their Reciprocal Hybrids
Source: Front Plant Sci. 2021 Jun 10;12:685189. doi: 10.3389/fpls.2021.685189 (PMC8222996; doi:10.3389/fpls.2021.685189)
Supplement: Supplementary Table 3 — List of non-additive and additive expressed genes and m6A peaks in hybrids. [file Table_3.XLSX]

## Sheet: F1CL_additive_genes
Gene	Expression (FPKM)		Ratio	pvalue	padj
	MPV	F1CL
AT1G01010	1.55734	1.61768	0.962701	0.902545	0.968772
AT1G01020	3.19491	3.65239	0.874746	0.535498	0.786575
AT1G01030	1.058	1.13777	0.929883	0.950225	0.984836
AT1G01040	4.2852	4.52306	0.947412	0.987152	0.996162
AT1G01050	42.6408	49.1114	0.868246	0.0396558	0.163221
AT1G01070	1.8575	1.88398	0.985946	0.859156	0.950427
AT1G01080	43.7994	47.0534	0.930846	0.66253	0.858047
AT1G01090	95.3854	107.832	0.884576	0.0134428	0.072354
AT1G01100	240.358	223.107	1.07732	0.0120723	0.0667973
AT1G01110	0.983439	1.51191	0.650462	0.0307241	0.135915
AT1G01140	19.0159	18.9864	1.00155	0.198241	0.467893
AT1G01160	10.3506	12.8975	0.802529	0.0327185	0.141938
AT1G01170	48.6739	55.6089	0.87529	0.163878	0.419572
AT1G01180	4.49579	4.5013	0.998774	0.723249	0.888355
AT1G01190	4.16188	4.02231	1.0347	0.548696	0.794729
AT1G01200	1.05249	1.06277	0.990328	0.817582	0.933709
AT1G01210	7.0848	6.38725	1.10921	0.18674	0.451538
AT1G01220	8.29397	7.80675	1.06241	0.0368786	0.154525
AT1G01225	1.56545	1.78024	0.87935	0.71279	0.883191
AT1G01230	16.9986	15.1458	1.12233	0.0397279	0.163411
AT1G01250	3.34545	4.34879	0.769281	0.210875	0.485097
AT1G01260	4.21471	3.71793	1.13362	0.0742719	0.252558
AT1G01290	3.56234	4.08407	0.872251	0.415181	0.699171
AT1G01320	71.8451	75.9095	0.946458	0.969672	0.990746
AT1G01340	1.23628	1.33543	0.925756	0.966926	0.990278
AT1G01350	6.69239	7.28633	0.918485	0.662073	0.857952
AT1G01360	5.76529	6.10778	0.943926	0.995869	0.998846
AT1G01370	1.95651	2.30016	0.850599	0.487037	0.755931
AT1G01420	2.74017	3.15567	0.868331	0.473432	0.74574
AT1G01430	13.4197	14.5132	0.924656	0.58614	0.818208
AT1G01440	4.83025	5.23083	0.923419	0.662714	0.858047
AT1G01450	2.1019	2.47736	0.848441	0.510838	0.770981
AT1G01470	34.3955	37.133	0.926278	0.626784	0.840935
AT1G01490	14.0997	14.2566	0.988991	0.405583	0.690324
AT1G01510	9.43987	10.6485	0.886496	0.233648	0.513251
AT1G01540	30.6313	32.9338	0.930087	0.525452	0.780701
AT1G01550	35.1247	37.7584	0.930249	0.536928	0.787054
AT1G01560	2.44327	1.78485	1.3689	0.013986	0.0745847
AT1G01600	5.87437	6.219	0.944585	0.978206	0.994112
AT1G01610	26.4808	29.7468	0.890209	0.14447	0.388609
AT1G01620	165.355	174.517	0.947505	0.541116	0.789758
AT1G01630	21.3953	21.6711	0.987274	0.538731	0.788196
AT1G01640	0.882504	0.939325	0.939509	0.89994	0.96775
AT1G01650	9.98534	10.6775	0.935172	0.842008	0.942365
AT1G01670	1.18345	1.62966	0.726192	0.14881	0.396494
AT1G01690	2.23914	2.08336	1.07477	0.423014	0.706898
AT1G01710	11.3177	12.5879	0.899088	0.397627	0.683175
AT1G01715	1.25664	1.61694	0.77717	0.413156	0.697551
AT1G01720	5.11368	4.89828	1.04397	0.236147	0.516625
AT1G01725	4.02893	5.09844	0.790228	0.329509	0.620756
AT1G01730	9.13361	9.3119	0.980853	0.698761	0.877258
AT1G01740	1.4414	1.40131	1.02861	0.619751	0.837018
AT1G01760	1.35752	1.29374	1.0493	0.623636	0.838757
AT1G01770	5.93205	5.7625	1.02942	0.344763	0.63565
AT1G01780	4.96302	5.38931	0.920901	0.789533	0.922295
AT1G01790	43.654	45.1544	0.966771	0.357737	0.64659
AT1G01800	41.8002	46.2821	0.903161	0.257197	0.541951
AT1G01820	29.9089	29.1523	1.02595	0.135307	0.372922
AT1G01830	6.44549	6.10953	1.05499	0.128422	0.361177
AT1G01840	1.78273	1.78623	0.998037	0.809031	0.930409
AT1G01860	5.48654	5.20442	1.05421	0.343694	0.634665
AT1G01900	3.85026	5.03204	0.76515	0.0153486	0.0803427
AT1G01910	19.4136	18.9586	1.024	0.188248	0.45329
AT1G01920	4.3414	4.79189	0.905989	0.629745	0.842721
AT1G01930	4.4273	4.21925	1.04931	0.289497	0.578753
AT1G01940	9.19862	10.8261	0.849674	0.254285	0.538506
AT1G01950	4.47912	5.62203	0.796709	0.0245663	0.115443
AT1G01960	17.367	16.742	1.03733	0.0189854	0.0947465
AT1G01970	18.9147	21.5693	0.876928	0.1398	0.380783
AT1G01990	8.36923	9.25545	0.904249	0.522177	0.779047
AT1G02000	3.80175	4.49975	0.84488	0.215917	0.491231
AT1G02010	2.17174	2.49258	0.871284	0.457389	0.735018
AT1G02020	6.3739	7.5227	0.847289	0.127779	0.360395
AT1G02050	2.22727	3.17504	0.701493	0.0406439	0.166107
AT1G02060	1.78798	2.01681	0.886536	0.634949	0.84548
AT1G02065	1.10669	1.75343	0.631156	0.0157834	0.0822627
AT1G02080	12.0656	13.0761	0.922718	0.306603	0.597307
AT1G02090	12.272	12.7758	0.960569	0.88965	0.964362
AT1G02100	11.8437	13.2038	0.896996	0.396301	0.681931
AT1G02110	8.73657	10.0424	0.869965	0.185192	0.44957
AT1G02120	25.1703	25.4631	0.988498	0.293754	0.583719
AT1G02130	19.426	19.7637	0.982915	0.74214	0.899224
AT1G02140	66.5233	76.4856	0.869749	0.0382837	0.159055
AT1G02145	6.98978	8.19781	0.85264	0.166029	0.422124
AT1G02160	17.6603	17.344	1.01824	0.459456	0.736511
AT1G02170	13.4404	14.0342	0.957688	0.875854	0.957911
AT1G02180	4.7273	4.77616	0.989771	0.746559	0.902064
AT1G02190	0.743932	1.28372	0.579514	0.00842731	0.0508333
AT1G02260	6.17516	5.84846	1.05586	0.18127	0.444019
AT1G02270	10.3278	9.67117	1.06789	0.196843	0.466165
AT1G02290	3.04163	3.63134	0.837604	0.280241	0.568437
AT1G02335	6.42361	7.74914	0.828946	0.209778	0.483502
AT1G02350	1.24175	1.57325	0.789286	0.597054	0.824124
AT1G02370	3.40019	2.89147	1.17594	0.0878355	0.284095
AT1G02380	1.40027	1.28434	1.09026	0.624601	0.839479
AT1G02390	0.667974	0.799318	0.83568	0.562585	0.801684
AT1G02410	7.88041	8.51849	0.925094	0.710319	0.88237
AT1G02420	2.19695	1.6223	1.35422	0.0311092	0.137117
AT1G02430	0.788182	0.749871	1.05109	0.783996	0.919396
AT1G02450	7.66205	6.33089	1.21026	0.0969765	0.303151
AT1G02475	33.9651	38.1548	0.890191	0.137864	0.376998
AT1G02560	171.492	189.033	0.907206	0.0824169	0.271858
AT1G02640	3.35344	3.48415	0.962483	0.944502	0.983639
AT1G02680	5.64682	5.98779	0.943055	0.99265	0.997785
AT1G02690	4.60549	5.1341	0.89704	0.492362	0.759805
AT1G02700	1.21011	1.16608	1.03775	0.770343	0.913942
AT1G02720	3.7614	4.45484	0.84434	0.170985	0.429347
AT1G02730	15.8728	16.1514	0.982751	0.599932	0.826266
AT1G02740	3.02559	2.99877	1.00894	0.661443	0.857532
AT1G02750	4.42103	4.52571	0.97687	0.841308	0.942234
AT1G02770	0.900023	0.912915	0.985878	0.984918	0.995438
AT1G02800	2.62246	3.74467	0.700319	0.00911795	0.0539028
AT1G02816	3.1439	4.49535	0.699369	0.00822827	0.0500642
AT1G02820	1.31868	1.62784	0.810082	0.54394	0.791953
AT1G02840	26.657	26.8909	0.991302	0.277575	0.565352
AT1G02850	1.18781	1.00623	1.18045	0.155671	0.405914
AT1G02860	2.3666	2.67284	0.885425	0.553838	0.798198
AT1G02870	14.3296	13.7233	1.04418	0.316188	0.607384
AT1G02890	13.296	14.0231	0.948152	0.945672	0.984135
AT1G02900	0.7758	1.10705	0.700781	0.328446	0.620008
AT1G02910	32.9979	35.2025	0.937375	0.824084	0.935615
AT1G02950	3.22335	3.49868	0.921304	0.872592	0.956941
AT1G02960	3.40207	3.27535	1.03869	0.414475	0.698543
AT1G02970	2.02442	2.424	0.835156	0.403773	0.688897
AT1G02990	2.57464	2.32973	1.10512	0.0684907	0.239219
AT1G03000	6.30762	6.52459	0.966745	0.843333	0.942882
AT1G03020	0.821538	1.62362	0.505992	0.0517354	0.196737
AT1G03030	6.57062	7.50352	0.875671	0.382307	0.667923
AT1G03040	16.3987	17.7493	0.923906	0.602355	0.826783
AT1G03060	4.44137	4.56018	0.973946	0.483663	0.753375
AT1G03080	5.3179	5.39233	0.986198	0.281167	0.569688
AT1G03090	4.35305	4.41072	0.986925	0.664687	0.858959
AT1G03100	1.18319	0.849505	1.3928	0.0218805	0.105769
AT1G03110	5.56433	5.43617	1.02357	0.465877	0.741139
AT1G03140	16.1753	15.5135	1.04266	0.168104	0.425339
AT1G03150	9.38133	9.72521	0.964641	0.995619	0.998846
AT1G03160	24.7168	28.1165	0.879084	0.0650952	0.231158
AT1G03165	1.16274	1.16119	1.00133	0.935941	0.981494
AT1G03190	2.56801	2.95559	0.868865	0.405693	0.690324
AT1G03210	10.7	9.78674	1.09332	0.0639886	0.228436
AT1G03220	14.811	15.1298	0.978928	0.558788	0.800845
AT1G03230	9.14703	8.64523	1.05804	0.11374	0.334157
AT1G03250	11.3429	12.1433	0.934087	0.753109	0.905486
AT1G03260	4.65461	4.61097	1.00946	0.571219	0.807544
AT1G03270	1.79582	2.31658	0.775203	0.190086	0.456251
AT1G03280	10.3475	11.3407	0.91242	0.556576	0.799172
AT1G03290	6.49485	6.40573	1.01391	0.169747	0.427371
AT1G03330	17.4491	17.7661	0.982158	0.656291	0.85521
AT1G03340	1.17984	1.26126	0.935451	0.952571	0.985675
AT1G03350	16.4704	15.4823	1.06383	0.0526979	0.199135
AT1G03360	4.87866	4.53031	1.07689	0.290689	0.580238
AT1G03365	3.87492	4.13382	0.937371	0.810867	0.93088
AT1G03370	8.26509	7.65614	1.07954	0.0121274	0.0670799
AT1G03380	5.3746	6.40687	0.83888	0.0498037	0.191561
AT1G03400	18.2994	18.8711	0.969707	0.704432	0.879585
AT1G03410	8.15285	9.89026	0.824331	0.0393094	0.162192
AT1G03430	9.823	11.4492	0.857962	0.181397	0.444019
AT1G03440	7.84269	8.19344	0.957192	0.986768	0.99615
AT1G03457	1.93675	2.51474	0.770158	0.0933577	0.295859
AT1G03470	2.58303	3.00705	0.858993	0.497781	0.763959
AT1G03495	1.79134	2.56986	0.697055	0.0821299	0.271177
AT1G03510	1.03033	0.852877	1.20806	0.284841	0.573239
AT1G03520	2.91936	3.17903	0.918316	0.72209	0.887667
AT1G03530	4.49728	4.61423	0.974656	0.741988	0.899224
AT1G03550	2.12364	2.16748	0.979772	0.811733	0.931012
AT1G03560	2.86364	2.92578	0.978761	0.757877	0.907259
AT1G03610	4.67136	4.48368	1.04186	0.372482	0.659749
AT1G03630	136.81	137.636	0.994004	0.112357	0.3316
AT1G03650	2.78468	3.07382	0.905936	0.753433	0.905554
AT1G03680	313.688	338.023	0.928008	0.31265	0.603626
AT1G03687	6.02333	6.36466	0.946371	0.942017	0.983468
AT1G03730	3.85322	2.90884	1.32466	0.0205505	0.100937
AT1G03750	1.24099	1.18803	1.04458	0.528139	0.782466
AT1G03760	3.56826	3.22314	1.10707	0.24108	0.522989
AT1G03770	0.890007	0.933341	0.953571	0.946278	0.984218
AT1G03780	3.37654	2.88961	1.16851	0.0460958	0.181444
AT1G03830	2.37402	2.26684	1.04728	0.357033	0.646227
AT1G03860	29.175	33.1923	0.878968	0.0851861	0.278364
AT1G03870	41.349	43.0521	0.96044	0.565724	0.803589
AT1G03900	45.0364	49.184	0.915671	0.508452	0.770352
AT1G03910	13.5548	12.8956	1.05112	0.0360557	0.151788
AT1G03930	12.3971	13.1	0.946342	0.95487	0.986596
AT1G03950	8.70872	9.82307	0.886558	0.471165	0.744615
AT1G03960	2.69559	2.9853	0.902955	0.571983	0.808051
AT1G03970	13.391	12.4423	1.07625	0.121478	0.348514
AT1G04000	6.22444	7.95598	0.78236	0.0469156	0.183645
AT1G04010	3.07681	3.90737	0.787438	0.0623373	0.224401
AT1G04020	4.6179	5.34532	0.863915	0.277684	0.565436
AT1G04030	1.42269	1.51271	0.94049	0.939127	0.982495
AT1G04040	68.3843	67.941	1.00652	0.299918	0.590772
AT1G04050	1.18566	1.45619	0.814223	0.246176	0.529259
AT1G04070	4.49184	5.34964	0.839653	0.411101	0.695438
AT1G04080	19.0908	19.6365	0.972206	0.577618	0.812186
AT1G04100	1.10598	1.11601	0.991009	0.865651	0.953281
AT1G04110	3.97741	3.3486	1.18778	0.044744	0.178222
AT1G04120	8.44031	9.92776	0.850173	0.0112941	0.0634746
AT1G04130	4.54242	5.18379	0.876274	0.465849	0.741139
AT1G04140	22.6926	25.4683	0.891011	0.0858874	0.280114
AT1G04160	1.98021	1.93527	1.02322	0.362989	0.651308
AT1G04170	40.2654	39.5678	1.01763	0.0991337	0.306995
AT1G04190	13.4457	13.7196	0.980032	0.65721	0.855744
AT1G04200	5.83072	6.13643	0.950182	0.978976	0.994385
AT1G04210	8.79586	8.40486	1.04652	0.0644538	0.229533
AT1G04220	1.05236	1.65539	0.63572	0.0145917	0.0772222
AT1G04230	2.96162	2.85026	1.03907	0.431023	0.71319
AT1G04240	8.26765	8.51056	0.971458	0.980931	0.994673
AT1G04250	10.8797	11.6928	0.930458	0.623599	0.838757
AT1G04260	4.61512	4.43226	1.04126	0.485762	0.754965
AT1G04270	231.021	227.571	1.01516	0.0204628	0.100625
AT1G04290	9.72173	11.353	0.856313	0.249502	0.532794
AT1G04300	8.02944	7.94082	1.01116	0.256292	0.540897
AT1G04310	1.85603	2.2558	0.822781	0.306335	0.597162
AT1G04340	9.66596	12.3316	0.783838	0.0206119	0.101191
AT1G04390	1.7541	1.93625	0.905925	0.637723	0.84665
AT1G04430	34.0275	33.4685	1.0167	0.038043	0.158211
AT1G04440	14.3794	15.6314	0.919906	0.518016	0.776001
AT1G04510	19.3828	19.5767	0.990093	0.482542	0.752957
AT1G04530	24.4415	22.6672	1.07828	0.0119828	0.0664114
AT1G04550	11.3023	13.322	0.848395	0.0975769	0.304235
AT1G04555	3.63314	3.59618	1.01028	0.772812	0.915171
AT1G04570	0.902125	0.881195	1.02375	0.627283	0.841237
AT1G04590	9.96579	10.2487	0.972392	0.768704	0.912867
AT1G04620	22.845	26.2353	0.870774	0.0607767	0.220481
AT1G04630	28.9567	28.5532	1.01413	0.286967	0.575682
AT1G04635	1.98866	2.07443	0.958655	0.963667	0.989293
AT1G04640	21.5438	23.0551	0.934446	0.765499	0.911544
AT1G04660	1.65845	2.35816	0.703282	0.130256	0.364989
AT1G04710	12.8995	15.9011	0.811233	0.014237	0.0756826
AT1G04730	1.79895	1.73133	1.03906	0.462577	0.738901
AT1G04750	32.8785	34.1624	0.962419	0.815197	0.932666
AT1G04760	1.30492	1.75037	0.745511	0.178884	0.440662
AT1G04770	7.23482	6.4874	1.11521	0.0614013	0.222079
AT1G04780	9.08098	8.72685	1.04058	0.155834	0.406096
AT1G04790	4.90573	6.19031	0.792486	0.0178367	0.0904111
AT1G04810	12.9691	14.5039	0.894183	0.146124	0.391366
AT1G04830	4.0715	4.11958	0.98833	0.673966	0.863304
AT1G04850	29.504	29.7306	0.992377	0.212902	0.487426
AT1G04860	8.46161	8.09044	1.04588	0.134184	0.371141
AT1G04870	14.0262	12.963	1.08202	0.0424577	0.17138
AT1G04900	4.12244	4.06405	1.01437	0.539257	0.788333
AT1G04910	9.7912	10.6632	0.918227	0.554536	0.798574
AT1G04930	1.60754	1.91892	0.837734	0.453767	0.732139
AT1G04940	1.62485	1.83513	0.885414	0.716878	0.884796
AT1G04945	1.67798	1.73184	0.968902	0.952505	0.985675
AT1G04950	5.97111	6.52776	0.914726	0.612138	0.832156
AT1G04960	7.3031	7.42487	0.983599	0.710481	0.88237
AT1G04970	6.14311	7.43422	0.826329	0.0818482	0.270407
AT1G04985	9.65843	10.5211	0.918008	0.605559	0.827997
AT1G04990	8.117	9.16351	0.885795	0.354855	0.644298
AT1G05030	3.34607	3.62022	0.924273	0.991185	0.997243
AT1G05055	6.03131	6.80884	0.885806	0.419587	0.703205
AT1G05060	8.84771	10.1636	0.870527	0.364607	0.652846
AT1G05065	1.73879	2.09387	0.830418	0.553451	0.797936
AT1G05070	11.427	13.0085	0.878428	0.372952	0.660021
AT1G05087	0.907716	0.566689	1.60179	0.0957645	0.300481
AT1G05120	4.6239	4.77537	0.96828	0.793062	0.924066
AT1G05136	0.361665	1.09565	0.330093	0.237245	0.518053
AT1G05140	40.6408	45.2742	0.89766	0.193273	0.461092
AT1G05150	11.531	10.9765	1.05052	0.0728146	0.249648
AT1G05160	2.89768	3.30478	0.876815	0.504308	0.768563
AT1G05170	5.10788	5.96177	0.856772	0.224274	0.502232
AT1G05180	11.3525	11.6595	0.973669	0.668142	0.860613
AT1G05190	417.199	440.107	0.94795	0.921754	0.976286
AT1G05200	5.49015	6.54455	0.838889	0.136884	0.375541
AT1G05205	16.7305	18.5108	0.903825	0.614181	0.833047
AT1G05210	5.52631	5.5218	1.00082	0.709727	0.88226
AT1G05230	6.18682	7.01613	0.881799	0.169267	0.426929
AT1G05300	1.48614	1.24585	1.19287	0.224109	0.502114
AT1G05310	1.68565	1.73975	0.9689	0.933317	0.980703
AT1G05350	12.1073	11.4749	1.05511	0.102171	0.312298
AT1G05360	3.30741	3.22504	1.02554	0.472243	0.744952
AT1G05370	1.1324	1.48103	0.7646	0.240367	0.522116
AT1G05380	6.92933	7.73664	0.895651	0.260251	0.545278
AT1G05385	18.7883	16.8938	1.11215	0.0361899	0.152162
AT1G05410	4.61189	4.79837	0.961137	0.925328	0.977932
AT1G05420	0.740323	0.982692	0.753361	0.36439	0.652846
AT1G05430	13.255	13.5086	0.981228	0.657195	0.855744
AT1G05440	1.04536	1.23725	0.844912	0.54458	0.792318
AT1G05460	3.92044	3.82289	1.02552	0.325788	0.617062
AT1G05470	2.39474	2.71762	0.881191	0.392993	0.678615
AT1G05500	12.7141	12.1711	1.04461	0.111521	0.330143
AT1G05520	11.1827	11.7502	0.951704	0.882181	0.960294
AT1G05560	19.0432	21.7094	0.877189	0.165763	0.421895
AT1G05575	0.940087	0.522581	1.79893	0.17079	0.429124
AT1G05590	6.01686	6.20101	0.970304	0.906369	0.970278
AT1G05600	2.59444	2.4177	1.0731	0.399092	0.684299
AT1G05620	6.5291	7.54797	0.865014	0.244265	0.527377
AT1G05630	8.42966	7.72751	1.09086	0.00941833	0.0551664
AT1G05640	1.67639	1.63303	1.02655	0.560418	0.801332
AT1G05670	1.3877	1.50369	0.922862	0.842566	0.942513
AT1G05680	0.690426	0.734706	0.93973	0.785488	0.919901
AT1G05690	1.14988	1.52039	0.756305	0.220829	0.496879
AT1G05720	10.0722	10.0745	0.999777	0.613496	0.83252
AT1G05750	1.76575	1.73529	1.01756	0.600097	0.826268
AT1G05780	1.70469	2.35355	0.724306	0.231102	0.510174
AT1G05785	1.50637	1.92189	0.783794	0.212533	0.487112
AT1G05790	5.45896	5.66337	0.963908	0.841362	0.942234
AT1G05810	6.41025	6.66959	0.961116	0.960658	0.988325
AT1G05830	4.18727	4.34739	0.963169	0.771481	0.914418
AT1G05835	4.85546	5.98493	0.811281	0.438301	0.719279
AT1G05840	5.56954	6.17604	0.901797	0.610034	0.830891
AT1G05850	228.288	249.103	0.916441	0.107135	0.3215
AT1G05860	2.72712	3.57163	0.76355	0.0513858	0.195718
AT1G05870	7.70752	9.31829	0.827139	0.0970954	0.303353
AT1G05890	11.1621	11.207	0.99599	0.399168	0.684299
AT1G05900	4.64459	5.9189	0.784705	0.0494775	0.190558
AT1G05910	6.75134	7.45231	0.90594	0.432043	0.713712
AT1G05940	12.3309	14.5977	0.844717	0.0222997	0.10727
AT1G05950	1.40376	1.4511	0.96738	0.856275	0.9492
AT1G05960	10.6625	11.3595	0.938642	0.72866	0.89154
AT1G05970	2.82427	2.95881	0.954531	0.942209	0.983468
AT1G06000	41.0929	48.3233	0.850373	0.024242	0.114398
AT1G06010	5.45027	5.86329	0.929559	0.892643	0.964928
AT1G06050	2.18906	2.10872	1.0381	0.65854	0.856351
AT1G06060	7.01842	7.58657	0.925112	0.754858	0.906291
AT1G06070	5.31162	5.70165	0.931594	0.809568	0.930469
AT1G06080	2.64969	3.86417	0.685709	0.0151537	0.0795236
AT1G06100	4.21067	4.62421	0.910571	0.780621	0.917545
AT1G06110	6.69517	7.54009	0.887943	0.381237	0.666705
AT1G06130	11.2601	13.0021	0.866022	0.165007	0.421235
AT1G06143	1.56918	1.71676	0.914036	0.799507	0.926847
AT1G06150	8.49431	9.70927	0.874866	0.197558	0.467265
AT1G06160	1.60108	1.58426	1.01062	0.760193	0.908801
AT1G06180	1.99548	2.60277	0.766673	0.262268	0.547182
AT1G06200	19.701	19.8048	0.994762	0.508419	0.770352
AT1G06210	8.88832	8.39633	1.0586	0.10727	0.321618
AT1G06220	16.4962	18.0419	0.914332	0.315882	0.607143
AT1G06230	9.87101	10.0925	0.978057	0.6449	0.849633
AT1G06240	9.23814	11.7074	0.789086	0.0107497	0.0611931
AT1G06250	0.716454	0.91209	0.785508	0.417913	0.701428
AT1G06260	1.00298	1.39893	0.716963	0.267601	0.553535
AT1G06270	2.0705	1.99288	1.03895	0.54449	0.792318
AT1G06290	19.4579	19.9452	0.975568	0.640135	0.84735
AT1G06380	4.97193	4.77456	1.04134	0.509619	0.770839
AT1G06390	15.926	17.8647	0.891477	0.275563	0.562822
AT1G06400	16.2896	16.087	1.0126	0.348084	0.638697
AT1G06420	2.05107	2.02717	1.01179	0.762558	0.910834
AT1G06440	1.00704	1.28998	0.78066	0.298999	0.589537
AT1G06470	8.7537	8.44402	1.03667	0.213735	0.488733
AT1G06500	7.0848	7.6032	0.931819	0.920336	0.975669
AT1G06510	15.1685	15.2155	0.996914	0.486877	0.75586
AT1G06515	9.53677	10.0897	0.945202	0.866566	0.953621
AT1G06550	13.4453	15.2674	0.880655	0.319083	0.610153
AT1G06560	5.14582	5.3827	0.955993	0.982887	0.994926
AT1G06570	5.79502	5.69469	1.01762	0.480878	0.751821
AT1G06590	2.16068	2.26472	0.954061	0.979574	0.994608
AT1G06620	1.27037	1.25893	1.00909	0.773176	0.915361
AT1G06630	2.63188	2.89597	0.908805	0.661752	0.857796
AT1G06650	29.2885	29.9952	0.976439	0.618649	0.836
AT1G06660	1.15634	1.10756	1.04404	0.69081	0.872459
AT1G06670	6.50189	6.46123	1.00629	0.282001	0.570197
AT1G06700	18.8633	20.6015	0.915628	0.37803	0.663765
AT1G06710	0.866794	0.852389	1.0169	0.639529	0.847029
AT1G06730	6.28104	6.55186	0.958664	0.902735	0.96883
AT1G06740	1.01965	1.15282	0.884484	0.673062	0.862699
AT1G06760	124.377	130.597	0.952377	0.901508	0.968339
AT1G06770	1.70597	2.07427	0.822446	0.257211	0.541951
AT1G06780	3.60251	4.23738	0.850174	0.194893	0.463383
AT1G06790	3.98567	4.06019	0.981647	0.776134	0.915775
AT1G06800	3.00143	3.34061	0.898467	0.646616	0.850179
AT1G06820	14.2372	16.5711	0.859162	0.0294858	0.132116
AT1G06840	3.27798	3.42571	0.956875	0.933511	0.980758
AT1G06850	3.63412	5.01404	0.724788	0.0299085	0.133401
AT1G06870	7.44515	8.28448	0.898687	0.481573	0.752425
AT1G06890	27.4559	28.8585	0.951397	0.997712	0.999404
AT1G06900	10.942	11.4871	0.952542	0.97592	0.993482
AT1G06910	2.2396	2.21946	1.00907	0.664363	0.858732
AT1G06960	7.46777	6.85922	1.08872	0.130929	0.365866
AT1G06980	2.18311	2.74505	0.795287	0.302699	0.593696
AT1G07000	8.26042	7.11299	1.16132	0.00843375	0.0508539
AT1G07020	10.0057	10.2861	0.972733	0.91069	0.971986
AT1G07030	9.83903	9.93106	0.990734	0.541473	0.790078
AT1G07040	9.91478	9.24669	1.07225	0.103181	0.314248
AT1G07070	25.6702	24.5976	1.0436	0.244482	0.527419
AT1G07080	35.1006	36.5891	0.95932	0.995907	0.998846
AT1G07090	9.54002	10.8085	0.882643	0.458827	0.73599
AT1G07110	51.7731	51.1259	1.01266	0.0330632	0.142916
AT1G07120	1.03347	1.06571	0.969752	0.997767	0.999404
AT1G07130	2.9952	3.24796	0.922178	0.800751	0.927286
AT1G07140	114.522	114.544	0.999809	0.0715835	0.246641
AT1G07170	5.21595	5.28063	0.987752	0.801043	0.927335
AT1G07200	6.88794	7.91041	0.870743	0.200956	0.47094
AT1G07210	16.766	18.0544	0.928639	0.722175	0.88768
AT1G07220	6.28656	7.78149	0.807887	0.0371161	0.155202
AT1G07230	10.737	12.3783	0.867406	0.111469	0.33014
AT1G07240	7.57825	6.37797	1.18819	0.00847629	0.0510112
AT1G07250	14.82	15.2534	0.971583	0.66374	0.858592
AT1G07270	0.73628	0.733455	1.00385	0.807359	0.929711
AT1G07300	1.51479	2.07147	0.731264	0.126477	0.358286
AT1G07310	11.5355	12.0758	0.955257	0.980038	0.99465
AT1G07320	256.982	256.984	0.999994	0.0348209	0.147887
AT1G07350	11.3795	12.4394	0.914793	0.675694	0.864432
AT1G07360	15.4934	16.4741	0.940471	0.717177	0.88481
AT1G07370	14.5849	12.9028	1.13036	0.0265424	0.122217
AT1G07380	1.97673	2.06897	0.955419	0.973324	0.992375
AT1G07400	0.962333	1.0811	0.890145	0.893507	0.965241
AT1G07410	1.68994	1.74139	0.970454	0.982378	0.994867
AT1G07420	13.8526	12.4199	1.11536	0.0254768	0.118743
AT1G07430	0.84398	0.551785	1.52955	0.0258062	0.119879
AT1G07470	6.34608	6.48924	0.977939	0.780506	0.917475
AT1G07480	4.21134	4.73227	0.88992	0.525379	0.780701
AT1G07510	3.83181	4.25752	0.900009	0.364619	0.652846
AT1G07530	7.4373	7.80851	0.95246	0.982269	0.994867
AT1G07570	3.01012	2.94329	1.02271	0.515474	0.773689
AT1G07590	21.5996	23.3506	0.925013	0.639411	0.847029
AT1G07610	13.4022	14.8277	0.903863	0.559263	0.800992
AT1G07615	4.1956	3.80638	1.10225	0.169566	0.427172
AT1G07620	0.679328	0.632265	1.07444	0.549221	0.794874
AT1G07630	5.04862	5.00328	1.00906	0.469266	0.742779
AT1G07650	10.4149	10.354	1.00589	0.25079	0.534388
AT1G07660	15.1523	18.5562	0.816563	0.0692206	0.241066
AT1G07670	10.8726	11.5967	0.937553	0.980519	0.99465
AT1G07700	19.6355	17.8347	1.10097	0.00891798	0.052956
AT1G07705	7.76694	7.88173	0.985436	0.653639	0.853889
AT1G07725	3.19282	3.47681	0.918319	0.798839	0.926601
AT1G07740	0.947584	1.11501	0.849841	0.522259	0.779047
AT1G07745	1.79379	2.26743	0.791112	0.220327	0.496474
AT1G07750	8.26934	6.9494	1.18994	0.00834963	0.0505827
AT1G07770	82.0165	85.0623	0.964193	0.782043	0.918124
AT1G07780	3.26999	3.86283	0.846526	0.176941	0.438062
AT1G07790	46.0139	45.8279	1.00406	0.309591	0.600064
AT1G07810	7.62647	8.38804	0.909208	0.413538	0.697681
AT1G07820	55.7437	60.1377	0.926934	0.554277	0.798419
AT1G07830	9.69329	10.1682	0.953291	0.982414	0.994867
AT1G07840	8.64868	9.6648	0.894863	0.418142	0.701625
AT1G07870	1.95116	2.32626	0.838751	0.321846	0.612715
AT1G07880	1.64194	1.88242	0.872251	0.605928	0.82814
AT1G07900	0.223079	0.355914	0.62678	0.334019	0.625146
AT1G07901	0.742219	1.01406	0.731931	0.679997	0.867317
AT1G07902	1.42207	1.45827	0.975177	0.955395	0.9867
AT1G07910	4.05705	3.92972	1.0324	0.270917	0.55788
AT1G07930	137.669	145.398	0.946844	0.876675	0.958072
AT1G07940	55.4433	57.7817	0.959531	0.924785	0.977708
AT1G07950	8.25686	8.99975	0.917454	0.781759	0.918048
AT1G07960	8.70469	10.3069	0.844551	0.15778	0.409141
AT1G07970	4.31468	4.52616	0.953276	0.942829	0.983473
AT1G07980	5.45465	6.71863	0.81187	0.101008	0.310025
AT1G07990	8.57534	8.38907	1.0222	0.218353	0.494378
AT1G08000	3.42687	4.24521	0.807233	0.0960273	0.30108
AT1G08030	4.20771	4.47444	0.940388	0.988413	0.996504
AT1G08040	12.2472	14.2318	0.860551	0.121375	0.348514
AT1G08050	2.04981	1.66566	1.23063	0.0634699	0.227163
AT1G08060	2.38045	2.52505	0.942733	0.857936	0.950093
AT1G08110	34.5123	40.5277	0.851572	0.00821585	0.0500068
AT1G08125	7.06893	7.76237	0.910666	0.679122	0.867022
AT1G08130	9.66099	9.73445	0.992453	0.492039	0.759794
AT1G08160	4.12509	5.72309	0.72078	0.0343272	0.146597
AT1G08165	1.16691	1.37999	0.845598	0.653725	0.853889
AT1G08180	2.12678	2.36659	0.898672	0.791479	0.923328
AT1G08210	4.86276	5.32692	0.912864	0.641009	0.847863
AT1G08220	2.51316	2.69646	0.93202	0.884818	0.961731
AT1G08260	1.48817	1.36466	1.09051	0.0781151	0.261873
AT1G08280	2.8123	3.49832	0.8039	0.129207	0.362839
AT1G08315	3.96745	4.50151	0.88136	0.495139	0.761993
AT1G08350	2.38026	2.80223	0.849418	0.309381	0.59994
AT1G08360	154.268	152.548	1.01128	0.0562352	0.208698
AT1G08370	8.55168	9.97616	0.857211	0.152217	0.40053
AT1G08390	2.26828	2.05258	1.10509	0.499728	0.765688
AT1G08400	1.52836	1.41066	1.08344	0.395819	0.681323
AT1G08410	5.50962	5.21503	1.05649	0.210065	0.4839
AT1G08420	15.9721	16.9226	0.943831	0.82316	0.935404
AT1G08460	5.90108	5.9636	0.989515	0.505819	0.769125
AT1G08465	9.11657	10.9437	0.833045	0.0870379	0.282745
AT1G08470	11.501	12.1355	0.947716	0.969513	0.990746
AT1G08480	33.3521	36.1247	0.923249	0.626091	0.840443
AT1G08490	22.2064	23.3361	0.951589	0.919984	0.975669
AT1G08500	1.67605	1.34304	1.24795	0.270833	0.557776
AT1G08510	42.3533	42.0743	1.00663	0.373521	0.660129
AT1G08520	100.945	101.449	0.995031	0.103556	0.314753
AT1G08530	7.54514	8.62237	0.875066	0.35142	0.641526
AT1G08540	61.3327	60.9376	1.00648	0.113317	0.333281
AT1G08570	24.0995	23.6852	1.01749	0.0934656	0.295947
AT1G08580	24.3669	22.7437	1.07137	0.108546	0.324028
AT1G08590	0.955168	1.37371	0.695321	0.0246213	0.115558
AT1G08600	3.05318	3.32668	0.917788	0.65822	0.856351
AT1G08620	4.22603	4.47279	0.944832	0.954758	0.986596
AT1G08650	13.025	11.4379	1.13876	0.00943185	0.0552263
AT1G08660	10.4855	10.7169	0.978408	0.761085	0.909423
AT1G08680	6.92358	8.23473	0.840779	0.0428525	0.172654
AT1G08700	8.99453	10.1518	0.886004	0.32456	0.61583
AT1G08710	3.16581	3.12506	1.01304	0.672605	0.862668
AT1G08720	4.42045	4.21684	1.04828	0.166948	0.423434
AT1G08750	4.71068	5.17808	0.909734	0.606355	0.828251
AT1G08760	4.26956	5.11316	0.835015	0.0870499	0.282745
AT1G08770	7.85088	8.89727	0.882392	0.381684	0.667182
AT1G08780	14.3074	13.1833	1.08526	0.136	0.37404
AT1G08800	1.94446	2.03873	0.953763	0.980236	0.99465
AT1G08810	5.63704	5.32231	1.05913	0.353975	0.643938
AT1G08820	7.45184	8.10079	0.91989	0.610952	0.831622
AT1G08830	180.405	205.27	0.878865	0.0122433	0.0676097
AT1G08840	1.109	1.04241	1.06389	0.377842	0.663643
AT1G08845	2.93387	3.01959	0.971612	0.925618	0.977932
AT1G08880	57.6562	61.3609	0.939624	0.730215	0.892272
AT1G08900	6.43901	5.99795	1.07353	0.16596	0.422076
AT1G08910	3.72123	4.3049	0.864416	0.292723	0.58236
AT1G08920	3.33023	3.30894	1.00643	0.603754	0.827432
AT1G08940	2.13315	2.46722	0.864594	0.562416	0.801684
AT1G08960	3.65178	4.31067	0.847151	0.177136	0.438324
AT1G08970	12.4389	11.9543	1.04054	0.182216	0.445211
AT1G09000	1.45969	1.75712	0.830727	0.36265	0.651126
AT1G09010	16.5103	16.1488	1.02239	0.129609	0.363662
AT1G09020	18.5619	21.3219	0.870553	0.0573681	0.211547
AT1G09040	1.14974	1.02799	1.11844	0.333729	0.625146
AT1G09050	1.02723	0.853155	1.20404	0.130939	0.365866
AT1G09060	7.91241	8.68255	0.9113	0.483989	0.753398
AT1G09070	28.8168	31.9919	0.900752	0.18753	0.452331
AT1G09100	9.8437	11.1712	0.881169	0.308479	0.599155
AT1G09130	86.2679	93.5236	0.922418	0.303108	0.594216
AT1G09140	13.101	15.453	0.8478	0.0384746	0.15965
AT1G09150	15.3038	17.2738	0.885956	0.262688	0.547853
AT1G09180	0.915098	1.11168	0.823167	0.563965	0.802374
AT1G09190	2.21446	2.61633	0.8464	0.427873	0.71047
AT1G09195	1.88907	1.65434	1.14189	0.108812	0.324562
AT1G09230	3.99849	3.56911	1.12031	0.182104	0.445007
AT1G09250	11.1105	11.6356	0.954871	0.931234	0.979875
AT1G09270	19.8557	20.7264	0.957993	0.81237	0.931323
AT1G09280	4.55892	4.32102	1.05506	0.302665	0.593696
AT1G09290	5.30079	5.2664	1.00653	0.673106	0.862699
AT1G09300	2.63504	2.83114	0.930736	0.781603	0.918048
AT1G09310	478.391	520.358	0.919349	0.218568	0.494584
AT1G09320	3.25299	2.98049	1.09143	0.245386	0.528372
AT1G09330	12.5789	12.4419	1.01101	0.325467	0.616672
AT1G09340	369.747	413.043	0.895177	0.00929397	0.0546476
AT1G09390	3.40948	3.63907	0.93691	0.970361	0.991016
AT1G09415	15.9166	16.0194	0.993584	0.63745	0.846544
AT1G09420	7.69436	7.95749	0.966933	0.653103	0.853722
AT1G09440	3.06237	2.92696	1.04626	0.366304	0.654468
AT1G09450	1.24144	1.40459	0.883842	0.665403	0.859283
AT1G09460	0.813839	0.571042	1.42518	0.190759	0.457109
AT1G09470	2.25585	1.58954	1.41919	0.011005	0.0620782
AT1G09480	0.802528	0.66669	1.20375	0.446256	0.726653
AT1G09500	1.5395	1.82199	0.844956	0.515639	0.773689
AT1G09520	6.54325	5.94531	1.10057	0.197873	0.467682
AT1G09530	2.71821	3.05294	0.89036	0.511916	0.771688
AT1G09560	16.0245	19.449	0.823924	0.0285614	0.129246
AT1G09580	7.22813	7.26537	0.994875	0.72843	0.891528
AT1G09590	115.046	118.332	0.972233	0.551697	0.796273
AT1G09620	32.4019	31.5653	1.0265	0.0551701	0.206066
AT1G09630	13.4795	13.438	1.00308	0.479709	0.750667
AT1G09645	9.7861	9.64966	1.01414	0.591201	0.821375
AT1G09660	18.8896	21.2185	0.89024	0.18363	0.447338
AT1G09690	194.618	189.65	1.0262	0.0102553	0.0587972
AT1G09700	4.2579	4.77466	0.891769	0.512783	0.772372
AT1G09710	1.9688	2.59386	0.759024	0.0664415	0.234058
AT1G09730	6.19229	6.01615	1.02928	0.256021	0.540597
AT1G09740	5.62522	5.05225	1.11341	0.202458	0.473442
AT1G09750	141.286	139.989	1.00927	0.491665	0.759625
AT1G09760	20.6569	21.6605	0.953668	0.922579	0.976851
AT1G09770	23.9168	24.7063	0.968047	0.706178	0.880611
AT1G09794	2.48845	3.025	0.822627	0.477557	0.749116
AT1G09800	3.03671	3.59259	0.845271	0.408285	0.692698
AT1G09810	3.3231	3.6962	0.899059	0.529954	0.783532
AT1G09812	1.02192	1.48486	0.688224	0.159742	0.412399
AT1G09815	17.9084	18.3705	0.974848	0.750344	0.904193
AT1G09820	1.61006	1.67254	0.962643	0.972886	0.992267
AT1G09830	18.6387	17.8157	1.04619	0.0509772	0.194559
AT1G09840	9.28379	10.5953	0.876216	0.200648	0.470615
AT1G09850	17.0862	17.8513	0.957142	0.754364	0.905895
AT1G09870	8.39549	8.15894	1.02899	0.302466	0.593696
AT1G09910	2.55842	2.6019	0.983286	0.58394	0.816291
AT1G09920	15.4306	17.6463	0.874437	0.287967	0.576655
AT1G09940	7.82011	8.10434	0.964929	0.840649	0.94214
AT1G09960	1.50526	1.86987	0.805007	0.277208	0.564878
AT1G09980	5.728	5.90084	0.970709	0.750755	0.904193
AT1G09995	0.760674	0.922094	0.824942	0.732092	0.893201
AT1G10030	6.36545	7.55874	0.842132	0.261324	0.546764
AT1G10040	1.16269	1.16235	1.00029	0.822412	0.935404
AT1G10050	3.13533	2.87538	1.0904	0.133664	0.370338
AT1G10090	10.1124	9.59188	1.05426	0.0711864	0.245671
AT1G10095	1.25597	1.21705	1.03198	0.602358	0.826783
AT1G10110	3.08445	2.96874	1.03897	0.828325	0.937715
AT1G10120	5.83473	6.44972	0.904649	0.466212	0.741392
AT1G10130	8.85344	8.98661	0.985181	0.543653	0.791741
AT1G10140	1.27132	1.03837	1.22435	0.345939	0.636921
AT1G10170	8.5234	9.36958	0.909689	0.397713	0.683252
AT1G10180	5.43041	5.94873	0.912869	0.593018	0.821914
AT1G10200	59.9607	60.8759	0.984967	0.453382	0.731927
AT1G10210	2.76505	3.25685	0.848993	0.344644	0.635512
AT1G10230	13.6764	13.0396	1.04884	0.419131	0.702792
AT1G10240	2.1206	2.15166	0.985562	0.802037	0.927881
AT1G10270	4.58838	4.88868	0.938574	0.781156	0.917918
AT1G10280	2.27569	2.76554	0.822872	0.260405	0.545327
AT1G10290	25.894	28.1196	0.920853	0.334026	0.625146
AT1G10310	15.6852	16.6762	0.940574	0.888314	0.963782
AT1G10320	3.85133	3.34369	1.15182	0.044838	0.178327
AT1G10350	6.89788	6.42722	1.07323	0.123772	0.353548
AT1G10370	10.1777	11.5372	0.882162	0.286175	0.574642
AT1G10380	4.72718	5.01975	0.941717	0.683823	0.869017
AT1G10390	14.9088	17.1494	0.869352	0.0220924	0.106547
AT1G10410	6.9658	7.62885	0.913086	0.544851	0.792382
AT1G10430	13.5414	15.7396	0.86034	0.126263	0.357909
AT1G10460	1.02572	1.09955	0.932859	0.950241	0.984836
AT1G10490	7.21054	7.28177	0.990219	0.631663	0.84395
AT1G10500	35.8333	41.2646	0.868379	0.12605	0.357559
AT1G10510	23.3758	25.1963	0.927747	0.575025	0.810183
AT1G10522	23.7206	26.1737	0.906277	0.335206	0.626711
AT1G10570	4.31993	3.99904	1.08024	0.13624	0.374203
AT1G10580	16.928	17.9128	0.945025	0.930125	0.979224
AT1G10600	7.48585	7.47049	1.00206	0.607413	0.82885
AT1G10630	29.0916	28.0677	1.03648	0.0772396	0.25978
AT1G10650	5.2906	6.98432	0.757497	0.00885708	0.0526502
AT1G10657	6.16256	6.38048	0.965845	0.880453	0.959665
AT1G10660	9.10706	11.2849	0.807016	0.0153407	0.0803296
AT1G10670	64.8667	67.1503	0.965992	0.510074	0.770977
AT1G10690	1.65709	1.28703	1.28753	0.26123	0.546755
AT1G10700	9.58768	9.16829	1.04574	0.201269	0.471294
AT1G10720	8.00098	7.76735	1.03008	0.313739	0.604962
AT1G10730	2.0205	2.14891	0.940241	0.901664	0.968383
AT1G10740	7.43232	8.81041	0.843584	0.0930497	0.295273
AT1G10780	2.40745	3.10667	0.77493	0.0951891	0.299066
AT1G10820	6.42819	8.29098	0.775323	0.0161458	0.0838134
AT1G10830	14.2953	16.2776	0.878217	0.136285	0.374265
AT1G10840	40.3764	41.0469	0.983663	0.466772	0.741791
AT1G10850	6.27339	7.41746	0.84576	0.0882441	0.285087
AT1G10865	8.07742	8.39772	0.961859	0.937094	0.981841
AT1G10870	5.78298	5.62467	1.02815	0.310478	0.60131
AT1G10890	12.261	13.6292	0.899613	0.300614	0.59161
AT1G10900	3.74383	3.29418	1.1365	0.0316374	0.138854
AT1G10910	11.9942	13.4352	0.892745	0.229705	0.508361
AT1G10920	2.6017	2.66035	0.977954	0.829988	0.93803
AT1G10930	5.93835	6.16905	0.962603	0.881456	0.959879
AT1G10940	23.4939	23.0593	1.01885	0.123112	0.35208
AT1G10950	41.8069	45.4584	0.919673	0.301559	0.592707
AT1G10970	2.47489	2.56108	0.966347	0.902276	0.968607
AT1G10990	2.08979	2.69511	0.775403	0.252121	0.535593
AT1G11000	1.79786	2.1828	0.823647	0.294534	0.584646
AT1G11020	5.19516	5.15283	1.00821	0.550337	0.79549
AT1G11050	3.75722	3.30222	1.13779	0.0831178	0.273632
AT1G11060	3.17953	3.2803	0.969282	0.886017	0.962723
AT1G11080	1.0167	0.805489	1.26221	0.20105	0.47095
AT1G11090	7.13821	8.00148	0.892111	0.522445	0.779047
AT1G11120	1.69621	2.18789	0.775275	0.321756	0.612614
AT1G11180	7.12726	7.26454	0.981102	0.700327	0.877656
AT1G11190	1.3068	1.86978	0.698906	0.127779	0.360395
AT1G11200	7.18729	8.00147	0.898246	0.555146	0.798727
AT1G11220	1.93186	1.91938	1.0065	0.756902	0.906749
AT1G11240	8.49457	7.4892	1.13424	0.0116345	0.0649465
AT1G11270	1.00075	1.0885	0.919384	0.817466	0.933709
AT1G11280	5.02709	5.12065	0.981728	0.723945	0.88889
AT1G11290	2.27699	2.31834	0.982165	0.807505	0.929711
AT1G11303	2.41908	2.29858	1.05242	0.381445	0.666834
AT1G11310	42.6775	43.7544	0.975388	0.341164	0.632401
AT1G11320	2.12621	2.20893	0.962553	0.947828	0.984231
AT1G11360	10.7249	10.5712	1.01454	0.360334	0.649068
AT1G11380	5.15121	5.61777	0.916949	0.631883	0.844103
AT1G11390	4.72729	5.02382	0.940976	0.864036	0.952535
AT1G11400	4.15805	4.42234	0.940238	0.933978	0.980818
AT1G11410	4.86623	4.44207	1.09549	0.0362184	0.152206
AT1G11420	1.31673	1.45517	0.904866	0.767656	0.911944
AT1G11430	99.6304	103.232	0.965113	0.735093	0.895237
AT1G11440	7.07537	7.5961	0.931448	0.846801	0.944559
AT1G11475	22.9587	27.4085	0.837649	0.083255	0.273815
AT1G11480	12.3028	12.2116	1.00747	0.295518	0.58559
AT1G11530	22.0026	21.4903	1.02384	0.393913	0.679639
AT1G11545	23.622	23.2729	1.015	0.425057	0.708484
AT1G11591	2.99315	3.30619	0.905317	0.816962	0.933408
AT1G11600	6.88889	7.49301	0.919376	0.723103	0.888355
AT1G11630	3.34797	3.30646	1.01255	0.600534	0.826339
AT1G11650	102.34	112.224	0.911922	0.171259	0.429502
AT1G11660	8.05636	8.12441	0.991624	0.445749	0.72632
AT1G11670	2.76609	3.55632	0.777797	0.0611066	0.221204
AT1G11680	29.1431	31.5736	0.923022	0.412976	0.697415
AT1G11710	0.820276	0.798954	1.02669	0.654472	0.854212
AT1G11730	0.937127	1.16072	0.807367	0.455585	0.733622
AT1G11750	66.7278	68.3056	0.9769	0.397885	0.683338
AT1G11755	4.75432	5.27842	0.90071	0.580371	0.814144
AT1G11760	3.85126	4.27272	0.90136	0.731267	0.892519
AT1G11780	4.8638	5.08077	0.957296	0.972053	0.991747
AT1G11790	15.0139	17.488	0.858527	0.0994595	0.307628
AT1G11800	4.23241	4.47729	0.945306	0.953276	0.986101
AT1G11840	93.4655	103.382	0.904076	0.156297	0.406614
AT1G11870	12.9608	13.6263	0.951165	0.935505	0.981322
AT1G11880	2.54539	2.83172	0.898885	0.629724	0.842721
AT1G11890	24.6575	24.2896	1.01514	0.257287	0.542043
AT1G11900	1.56144	1.32316	1.18009	0.328374	0.619959
AT1G11905	6.17365	6.41145	0.96291	0.906883	0.970278
AT1G11910	97.7094	97.5105	1.00204	0.0421316	0.170363
AT1G11940	2.24367	2.33588	0.960524	0.966711	0.990239
AT1G11960	3.65029	4.11647	0.886754	0.385658	0.6708
AT1G12000	29.073	30.8085	0.943668	0.828616	0.937745
AT1G12010	0.704853	0.849606	0.829623	0.794302	0.924502
AT1G12020	3.46492	3.39854	1.01953	0.582896	0.81558
AT1G12050	16.6972	17.0591	0.97879	0.643265	0.848975
AT1G12060	5.76922	5.91822	0.974823	0.829896	0.93803
AT1G12100	1.09193	0.744814	1.46604	0.38799	0.673369
AT1G12120	17.321	18.2639	0.948374	0.811438	0.930898
AT1G12140	15.0259	16.4339	0.91432	0.390216	0.675444
AT1G12200	1.8821	2.53285	0.743075	0.0832204	0.273755
AT1G12220	1.56236	1.27497	1.22541	0.0223272	0.107371
AT1G12244	8.18497	8.21671	0.996137	0.663794	0.858592
AT1G12250	43.3642	50.2995	0.86212	0.0189965	0.0947738
AT1G12270	17.6355	16.4669	1.07096	0.023984	0.113614
AT1G12280	4.48501	4.27823	1.04833	0.239437	0.520634
AT1G12320	2.72746	2.38338	1.14436	0.0935467	0.296063
AT1G12330	17.8658	19.3859	0.921586	0.320672	0.611372
AT1G12340	2.73448	2.92947	0.933437	0.679929	0.867317
AT1G12350	15.292	15.0663	1.01498	0.57552	0.810662
AT1G12360	10.2397	9.94575	1.02955	0.154599	0.404271
AT1G12370	1.81015	2.19406	0.825022	0.349745	0.63965
AT1G12390	2.49595	2.8404	0.878731	0.84549	0.943974
AT1G12400	2.98402	4.63671	0.643565	0.0171317	0.0878183
AT1G12410	104.277	104.696	0.996002	0.138528	0.378382
AT1G12420	4.09853	3.57822	1.14541	0.0814855	0.269473
AT1G12430	8.59013	8.71129	0.986091	0.570964	0.807368
AT1G12440	20.6797	21.816	0.947915	0.880852	0.959719
AT1G12450	3.65406	3.84517	0.950299	0.922131	0.976556
AT1G12460	5.02822	4.71186	1.06714	0.135018	0.372554
AT1G12470	7.64989	8.11664	0.942495	0.906744	0.970278
AT1G12480	2.67598	2.61872	1.02187	0.634209	0.84526
AT1G12500	18.9416	21.8386	0.867345	0.0401307	0.16461
AT1G12530	7.05434	9.60177	0.734691	0.0213574	0.103747
AT1G12550	4.18944	4.69059	0.893157	0.55501	0.798727
AT1G12570	4.91146	6.09946	0.805229	0.0334294	0.14399
AT1G12580	7.5099	7.63721	0.983331	0.6727	0.862668
AT1G12620	1.4634	1.2241	1.19549	0.121223	0.348221
AT1G12640	10.4938	10.8235	0.96954	0.767483	0.911944
AT1G12680	6.52148	6.32106	1.03171	0.302369	0.593696
AT1G12700	0.797002	0.766993	1.03913	0.583853	0.816291
AT1G12730	2.58245	3.03011	0.852264	0.432309	0.713772
AT1G12750	3.05787	4.20308	0.727531	0.0176216	0.0896184
AT1G12760	18.7052	18.1014	1.03336	0.105172	0.318054
AT1G12775	1.13867	0.932162	1.22153	0.198079	0.467708
AT1G12780	11.8416	11.0904	1.06773	0.125921	0.357497
AT1G12790	1.26835	1.28755	0.985087	0.955256	0.9867
AT1G12810	12.8815	13.8677	0.928887	0.736325	0.89599
AT1G12820	15.7208	17.5654	0.894986	0.291839	0.581214
AT1G12840	51.594	53.209	0.96965	0.478547	0.750165
AT1G12845	11.9537	10.6825	1.119	0.176427	0.437434
AT1G12850	14.7656	16.2904	0.906398	0.487103	0.755931
AT1G12860	14.2425	13.8922	1.02521	0.251217	0.534756
AT1G12880	2.54259	2.63673	0.964298	0.862157	0.95191
AT1G12910	8.48113	8.90167	0.952758	0.959932	0.98807
AT1G12930	4.54097	4.85822	0.934699	0.842182	0.942365
AT1G12970	2.69262	3.16071	0.851902	0.392255	0.677802
AT1G12990	12.5491	12.9911	0.965984	0.955343	0.9867
AT1G13030	3.66748	3.29683	1.11243	0.153615	0.402818
AT1G13040	1.19168	1.17686	1.01259	0.710467	0.88237
AT1G13050	1.33539	1.47153	0.907482	0.759947	0.908801
AT1G13060	40.2431	42.1739	0.954217	0.895234	0.965583
AT1G13080	4.32326	4.05848	1.06524	0.262846	0.548034
AT1G13090	24.725	26.8621	0.920441	0.498385	0.764276
AT1G13100	2.53611	3.03164	0.836548	0.337224	0.628757
AT1G13120	5.29126	4.82648	1.0963	0.0694199	0.241438
AT1G13170	7.47255	7.80334	0.95761	0.753161	0.905486
AT1G13180	3.64863	3.72913	0.978413	0.830341	0.938154
AT1G13195	2.19605	2.57275	0.853579	0.453505	0.731927
AT1G13245	6.67108	5.51868	1.20882	0.0902501	0.289397
AT1G13250	11.9271	13.5381	0.881001	0.183755	0.447347
AT1G13270	53.7465	55.8298	0.962685	0.734334	0.894636
AT1G13280	21.8921	24.6963	0.886454	0.171659	0.430122
AT1G13320	20.2533	19.9858	1.01338	0.151305	0.399443
AT1G13330	1.24989	1.17482	1.06391	0.685306	0.869736
AT1G13350	7.94752	8.63916	0.919941	0.59444	0.822751
AT1G13360	21.572	21.6508	0.996358	0.340767	0.63232
AT1G13380	14.1182	15.9836	0.883296	0.276638	0.564401
AT1G13390	5.84532	7.19416	0.81251	0.0668995	0.235134
AT1G13410	1.09545	1.00625	1.08865	0.481566	0.752425
AT1G13440	426.074	434.931	0.979634	0.0811216	0.268693
AT1G13450	4.28274	4.77963	0.89604	0.53204	0.784627
AT1G13460	4.93388	4.4356	1.11234	0.0604057	0.219708
AT1G13560	21.6543	23.4905	0.921834	0.465657	0.741139
AT1G13570	2.58951	2.55643	1.01294	0.59214	0.821667
AT1G13580	3.07227	3.47291	0.884639	0.454864	0.733109
AT1G13609	1.1591	2.13349	0.543287	0.108023	0.323068
AT1G13640	16.3451	16.0884	1.01596	0.0728797	0.249769
AT1G13650	7.449	6.80334	1.0949	0.120663	0.347154
AT1G13690	14.6223	14.1421	1.03396	0.347124	0.637772
AT1G13700	1.11282	0.608186	1.82973	0.0387692	0.160515
AT1G13710	3.25777	3.81971	0.852884	0.255641	0.539996
AT1G13730	10.745	11.1343	0.965039	0.894159	0.965431
AT1G13740	5.06264	4.45066	1.1375	0.0710533	0.24542
AT1G13770	3.9125	4.39569	0.890075	0.545549	0.792762
AT1G13780	1.6351	1.61282	1.01381	0.713921	0.883921
AT1G13790	1.60079	1.77725	0.900711	0.636841	0.84626
AT1G13810	2.76398	2.63932	1.04723	0.535191	0.786551
AT1G13820	33.5783	31.6689	1.06029	0.0262771	0.121295
AT1G13860	5.25015	5.57436	0.94184	0.900664	0.967826
AT1G13870	7.91749	8.38542	0.944197	0.888369	0.963782
AT1G13880	7.20972	8.09587	0.890543	0.328644	0.620176
AT1G13900	9.49461	9.37028	1.01327	0.370458	0.658387
AT1G13910	1.95829	2.23157	0.877541	0.633722	0.844946
AT1G13920	2.71426	2.16463	1.25391	0.0823072	0.27162
AT1G13940	2.4842	2.48922	0.997981	0.631638	0.84395
AT1G13950	3.72525	5.38411	0.691898	0.0323327	0.140966
AT1G13960	4.58424	4.39679	1.04263	0.309165	0.599784
AT1G13980	6.22452	6.43796	0.966846	0.755057	0.906291
AT1G14000	24.0634	25.0504	0.9606	0.814628	0.932666
AT1G14010	16.7924	19.0755	0.88031	0.375667	0.661971
AT1G14020	7.76158	7.60876	1.02008	0.388521	0.673942
AT1G14030	21.5774	20.334	1.06115	0.0322204	0.140686
AT1G14040	1.33598	1.88038	0.710485	0.0207117	0.101436
AT1G14060	7.11131	6.30019	1.12875	0.0698938	0.242573
AT1G14130	2.82102	3.33969	0.844695	0.343153	0.634155
AT1G14140	8.24714	8.63586	0.954987	0.908382	0.971003
AT1G14180	2.85499	3.48133	0.820086	0.21279	0.487368
AT1G14190	0.728536	1.07844	0.675547	0.135773	0.373775
AT1G14205	5.66219	4.34271	1.30384	0.093888	0.296867
AT1G14210	7.18946	7.39483	0.972227	0.860101	0.951128
AT1G14230	6.05312	6.33281	0.955835	0.976807	0.993634
AT1G14270	28.7257	29.9877	0.957918	0.659523	0.856476
AT1G14280	7.16263	6.38634	1.12156	0.0556794	0.207384
AT1G14290	6.03975	6.64556	0.90884	0.458779	0.735984
AT1G14300	5.11324	4.47142	1.14354	0.0832824	0.273852
AT1G14310	8.31878	8.92421	0.932159	0.920014	0.975669
AT1G14330	3.89604	3.40832	1.1431	0.105808	0.319168
AT1G14340	8.29416	8.52581	0.97283	0.828047	0.937463
AT1G14370	2.9812	2.73327	1.09071	0.317334	0.608749
AT1G14380	7.84178	7.18613	1.09124	0.0321954	0.140613
AT1G14400	39.7689	39.9293	0.995984	0.283952	0.572395
AT1G14410	20.2483	23.0645	0.877902	0.144537	0.388626
AT1G14430	2.21335	3.11556	0.710417	0.0287618	0.129769
AT1G14440	6.03538	5.55359	1.08675	0.184293	0.448198
AT1G14450	5.81592	5.97306	0.973692	0.909317	0.971562
AT1G14510	15.1971	14.2531	1.06623	0.0593605	0.216878
AT1G14520	2.77218	2.22159	1.24783	0.0803481	0.267017
AT1G14530	2.37192	3.08021	0.770051	0.115633	0.337712
AT1G14560	4.35698	4.3772	0.995382	0.620125	0.837265
AT1G14570	16.1389	18.9797	0.850325	0.0332254	0.143322
AT1G14580	5.56635	4.71884	1.1796	0.0154877	0.0809223
AT1G14590	5.1031	6.87463	0.742309	0.012299	0.0678059
AT1G14600	1.2979	1.72761	0.75127	0.277253	0.5649
AT1G14610	22.7657	22.59	1.00778	0.118837	0.344014
AT1G14620	9.40956	9.66795	0.973273	0.76745	0.911944
AT1G14630	1.81669	1.88163	0.965483	0.969672	0.990746
AT1G14640	0.982496	0.918447	1.06974	0.56291	0.801684
AT1G14642	1.15248	0.705229	1.63419	0.500318	0.766242
AT1G14650	12.5424	13.204	0.949893	0.890997	0.964702
AT1G14660	1.46427	1.49349	0.980434	0.896185	0.966069
AT1G14670	45.4272	45.5316	0.997707	0.304018	0.595101
AT1G14680	0.993329	0.909302	1.09241	0.594861	0.822917
AT1G14685	10.6332	9.85668	1.07879	0.0565788	0.209733
AT1G14687	1.99726	2.01531	0.991046	0.873067	0.957074
AT1G14690	8.08373	7.40782	1.09124	0.0369481	0.15473
AT1G14710	20.1891	20.7171	0.974515	0.604166	0.827684
AT1G14720	25.5969	26.1835	0.977596	0.749017	0.903609
AT1G14730	1.00646	1.32044	0.762218	0.34428	0.63512
AT1G14740	16.0968	15.1223	1.06444	0.0304339	0.134991
AT1G14770	1.83729	2.17809	0.843531	0.332375	0.62357
AT1G14790	4.38307	4.42923	0.989578	0.514737	0.773234
AT1G14810	56.9079	55.726	1.02121	0.037241	0.155608
AT1G14820	8.5751	8.77376	0.977357	0.721231	0.887104
AT1G14830	22.5366	24.6089	0.915791	0.374283	0.660492
AT1G14840	8.43056	8.03995	1.04858	0.0656534	0.232129
AT1G14850	5.73791	6.21244	0.923615	0.587365	0.818951
AT1G14880	263.958	270.354	0.976342	0.655306	0.854529
AT1G14890	7.29173	8.04693	0.90615	0.723953	0.88889
AT1G14910	12.4212	13.3122	0.933074	0.681686	0.868028
AT1G14920	21.572	19.6962	1.09524	0.0134279	0.0723435
AT1G14970	1.92035	2.20235	0.871953	0.523863	0.779344
AT1G14980	48.4936	51.6721	0.938486	0.958047	0.98742
AT1G14990	6.52897	7.35835	0.887288	0.571648	0.807986
AT1G15000	11.0393	13.3403	0.82752	0.0398994	0.163902
AT1G15020	3.92886	3.7433	1.04957	0.348213	0.638697
AT1G15030	11.8453	12.2956	0.963376	0.825457	0.936235
AT1G15060	7.04908	7.85586	0.897302	0.43518	0.71661
AT1G15080	2.12917	2.16226	0.984698	0.886941	0.963231
AT1G15085	5.1183	5.31824	0.962406	0.959632	0.98807
AT1G15100	7.95687	9.50747	0.836907	0.304198	0.595246
AT1G15110	1.33626	1.64023	0.814677	0.32886	0.620372
AT1G15120	47.7766	55.6683	0.858237	0.0108744	0.061646
AT1G15130	14.4671	14.934	0.968731	0.699214	0.877428
AT1G15160	1.97912	2.55182	0.775573	0.179852	0.442268
AT1G15165	3.90586	5.0516	0.773192	0.149604	0.397641
AT1G15170	3.00128	3.18629	0.941936	0.903624	0.968949
AT1G15180	7.62477	9.17681	0.830874	0.108119	0.323298
AT1G15200	23.1842	22.4276	1.03374	0.0978277	0.304736
AT1G15215	3.08587	3.905	0.790237	0.167431	0.424094
AT1G15220	2.77125	3.14311	0.88169	0.60468	0.827997
AT1G15230	11.7208	11.8738	0.987113	0.542069	0.790618
AT1G15240	5.35259	5.14206	1.04094	0.154413	0.404029
AT1G15250	15.2734	14.1441	1.07984	0.155904	0.406096
AT1G15260	23.5147	28.4669	0.826035	0.0206141	0.101191
AT1G15280	14.2621	16.7555	0.851191	0.0391681	0.161722
AT1G15290	17.8906	19.0886	0.937236	0.850604	0.946349
AT1G15310	1.1745	1.50048	0.782746	0.265456	0.550754
AT1G15340	47.0722	46.0069	1.02315	0.0308523	0.136235
AT1G15350	3.46927	3.909	0.887509	0.574713	0.81
AT1G15370	16.8048	18.6431	0.901396	0.492297	0.759794
AT1G15390	21.0834	19.8481	1.06224	0.0862507	0.280855
AT1G15400	13.9077	15.7102	0.885269	0.358983	0.647797
AT1G15410	3.79466	4.12391	0.920161	0.955584	0.9867
AT1G15420	8.94649	9.01096	0.992845	0.644568	0.849462
AT1G15430	2.30935	2.2865	1.01	0.695779	0.875157
AT1G15440	7.54864	6.79323	1.1112	0.0260481	0.120669
AT1G15470	9.57822	9.85348	0.972064	0.689895	0.872047
AT1G15480	4.24699	3.82435	1.11051	0.139836	0.380783
AT1G15490	3.0318	3.30605	0.917044	0.77214	0.914877
AT1G15510	4.44274	3.62318	1.2262	0.00881729	0.052488
AT1G15520	1.06832	0.895791	1.1926	0.171945	0.430517
AT1G15530	5.79031	6.42693	0.900944	0.510026	0.770977
AT1G15550	2.36003	2.19707	1.07417	0.527184	0.781929
AT1G15570	4.51471	5.00855	0.9014	0.549486	0.794874
AT1G15580	1.14465	0.774334	1.47824	0.178564	0.440295
AT1G15660	5.30049	5.66396	0.935827	0.71893	0.885831
AT1G15690	424.806	446.304	0.951831	0.988728	0.996504
AT1G15700	1.74261	1.56392	1.11426	0.4187	0.70221
AT1G15710	8.99447	10.8243	0.830954	0.0734569	0.250826
AT1G15720	0.917554	1.10685	0.828978	0.621376	0.837864
AT1G15740	10.2688	9.20969	1.115	0.0152403	0.0799033
AT1G15760	0.978982	1.90211	0.514682	0.00954588	0.0556998
AT1G15790	1.77187	1.79109	0.989268	0.800699	0.927286
AT1G15800	2.35118	1.8748	1.2541	0.146433	0.392131
AT1G15810	10.5962	11.4073	0.928895	0.728174	0.891465
AT1G15860	14.7588	16.9016	0.873217	0.148996	0.396654
AT1G15870	2.44347	2.49892	0.977809	0.959211	0.987998
AT1G15880	7.77131	8.50114	0.914149	0.848734	0.945584
AT1G15885	2.96369	3.4594	0.856706	0.817706	0.933709
AT1G15910	7.74086	7.89861	0.980029	0.783347	0.91882
AT1G15920	3.95291	4.25743	0.928473	0.762448	0.91079
AT1G15940	4.35811	4.28823	1.0163	0.28419	0.572436
AT1G15950	15.8503	15.6032	1.01583	0.170758	0.429124
AT1G15960	1.10081	1.0877	1.01206	0.700323	0.877656
AT1G15970	8.26357	8.39521	0.984321	0.698014	0.876851
AT1G16000	21.7289	20.983	1.03555	0.326937	0.618549
AT1G16010	13.3976	14.1148	0.949191	0.94264	0.983468
AT1G16020	7.4727	8.78512	0.850609	0.0875594	0.283749
AT1G16030	1.52239	1.54288	0.98672	0.750708	0.904193
AT1G16040	3.27321	3.41289	0.959073	0.915367	0.973698
AT1G16080	118.851	122.781	0.967995	0.573064	0.808695
AT1G16090	1.57237	2.12025	0.741598	0.165942	0.422076
AT1G16110	2.04404	1.77454	1.15187	0.17142	0.429776
AT1G16170	6.28301	6.82176	0.921026	0.688836	0.871578
AT1G16180	39.3926	38.2843	1.02895	0.0474338	0.18503
AT1G16190	7.36791	9.25277	0.796293	0.0200186	0.0987869
AT1G16210	28.8944	28.6169	1.0097	0.160208	0.413157
AT1G16220	1.85467	1.82319	1.01727	0.621312	0.837864
AT1G16240	18.9587	19.8368	0.955736	0.993031	0.997785
AT1G16250	2.31442	2.29727	1.00746	0.655212	0.854529
AT1G16260	5.35037	5.33898	1.00213	0.299577	0.590399
AT1G16270	3.92255	4.26742	0.919185	0.683085	0.868849
AT1G16280	3.92771	3.58045	1.09699	0.162326	0.41692
AT1G16300	1.80619	2.09677	0.861415	0.548405	0.794729
AT1G16310	1.20922	1.67181	0.723298	0.103594	0.314754
AT1G16330	1.03978	1.35772	0.765824	0.241814	0.523971
AT1G16340	8.3946	9.40095	0.892952	0.427696	0.710364
AT1G16350	22.5375	20.8011	1.08347	0.00854102	0.0512614
AT1G16390	1.84536	2.33519	0.790243	0.178065	0.439484
AT1G16400	2.51619	1.95937	1.28418	0.0271722	0.124164
AT1G16430	4.79529	5.12612	0.935462	0.980538	0.99465
AT1G16445	2.97881	2.71917	1.09549	0.452255	0.731429
AT1G16460	24.9954	26.1676	0.955205	0.923445	0.977355
AT1G16470	31.4915	33.9801	0.926764	0.606925	0.828626
AT1G16490	1.15828	1.38224	0.837969	0.547246	0.794178
AT1G16500	6.43159	7.55371	0.851448	0.255128	0.539321
AT1G16510	2.23445	1.97458	1.1316	0.402711	0.687897
AT1G16515	1.38501	1.84715	0.749808	0.340071	0.631634
AT1G16520	9.85316	12.6326	0.779979	0.0102322	0.0587251
AT1G16530	1.45168	1.73486	0.836769	0.664827	0.858959
AT1G16540	1.41518	1.51288	0.935423	0.948754	0.984395
AT1G16560	18.0311	19.3429	0.93218	0.679192	0.867022
AT1G16570	4.44847	4.84905	0.917389	0.752492	0.905154
AT1G16590	2.91011	3.31178	0.878714	0.467992	0.742195
AT1G16610	16.4969	18.1781	0.907513	0.40686	0.691119
AT1G16640	1.23832	1.44426	0.85741	0.725063	0.889667
AT1G16650	1.90891	1.7577	1.08603	0.369896	0.657682
AT1G16670	5.7536	5.45835	1.05409	0.248787	0.531876
AT1G16680	6.44725	5.9129	1.09037	0.0523141	0.198265
AT1G16690	3.29971	3.36199	0.981474	0.798231	0.926523
AT1G16700	28.2541	29.6157	0.954025	0.898738	0.967407
AT1G16720	48.8832	49.2785	0.991977	0.220343	0.496474
AT1G16730	1.43554	1.15816	1.23951	0.276321	0.563959
AT1G16740	21.8419	22.3715	0.976324	0.73992	0.89831
AT1G16750	4.66093	5.60706	0.831261	0.149249	0.39699
AT1G16780	5.64833	5.94728	0.949733	0.954267	0.986436
AT1G16800	0.982155	0.912052	1.07686	0.247092	0.530443
AT1G16810	35.5453	38.3239	0.927496	0.623962	0.838994
AT1G16820	1.58534	2.32159	0.682868	0.0338738	0.145039
AT1G16825	2.33435	2.3093	1.01085	0.700302	0.877656
AT1G16830	0.844862	0.796313	1.06097	0.67266	0.862668
AT1G16840	19.4899	17.4954	1.114	0.0140573	0.074846
AT1G16850	8.10909	7.91966	1.02392	0.514067	0.77308
AT1G16860	21.6719	21.9759	0.986165	0.485341	0.754591
AT1G16870	12.6596	12.2265	1.03542	0.200428	0.470609
AT1G16890	33.7461	37.4589	0.900883	0.190293	0.456489
AT1G16900	5.85812	6.67235	0.87797	0.28561	0.573894
AT1G16916	4.7126	4.72845	0.996648	0.756357	0.906707
AT1G16920	20.3595	20.8257	0.977614	0.637624	0.846586
AT1G16930	1.70207	1.62168	1.04957	0.572787	0.808507
AT1G16960	7.57935	7.90729	0.958527	0.992442	0.997785
AT1G16970	4.32338	3.63552	1.1892	0.0163889	0.0848396
AT1G17040	1.55384	1.69128	0.918738	0.764587	0.911321
AT1G17050	11.435	13.3277	0.857981	0.138905	0.379165
AT1G17070	5.33621	4.83783	1.10302	0.053661	0.201866
AT1G17080	20.2412	19.8966	1.01732	0.316158	0.607384
AT1G17090	2.14449	3.05983	0.700851	0.0452092	0.179225
AT1G17120	8.98382	9.04688	0.99303	0.559312	0.800992
AT1G17130	15.506	15.6002	0.99396	0.532638	0.784819
AT1G17140	21.1887	20.0207	1.05834	0.0257333	0.119673
AT1G17145	4.10739	4.55192	0.902341	0.609002	0.830112
AT1G17160	10.3098	9.07038	1.13665	0.0101841	0.0585108
AT1G17170	0.945431	0.874582	1.08101	0.716391	0.884709
AT1G17190	3.37718	2.60239	1.29772	0.032415	0.141148
AT1G17200	29.9239	33.757	0.886451	0.227272	0.505976
AT1G17210	12.0022	12.5181	0.958787	0.756028	0.906707
AT1G17220	124.085	127.127	0.97607	0.156441	0.40686
AT1G17230	2.50645	2.46479	1.0169	0.51085	0.770981
AT1G17250	1.14984	1.38466	0.830413	0.470895	0.744437
AT1G17270	2.13628	1.98605	1.07564	0.323004	0.614293
AT1G17280	6.66197	8.02732	0.829912	0.0836402	0.274706
AT1G17330	6.81613	7.55592	0.902092	0.765837	0.911544
AT1G17340	4.67613	4.62109	1.01191	0.406481	0.690824
AT1G17350	3.06601	2.82382	1.08577	0.285018	0.573359
AT1G17370	23.2651	26.0263	0.893905	0.215481	0.49043
AT1G17410	2.38286	2.41676	0.985973	0.820035	0.934631
AT1G17420	6.43268	6.3929	1.00622	0.370799	0.658574
AT1G17430	8.26581	8.37859	0.98654	0.675704	0.864432
AT1G17450	2.38602	2.40581	0.991772	0.560104	0.801208
AT1G17455	5.60113	5.24866	1.06715	0.435166	0.71661
AT1G17460	1.77733	1.72962	1.02758	0.594499	0.822765
AT1G17470	36.2749	40.3546	0.898903	0.170333	0.428391
AT1G17480	2.16232	2.21535	0.976061	0.886944	0.963231
AT1G17490	13.2695	13.62	0.974265	0.804187	0.929179
AT1G17510	8.53009	7.86718	1.08426	0.271134	0.558054
AT1G17520	4.55557	5.17241	0.880744	0.448702	0.728962
AT1G17530	9.65609	9.47624	1.01898	0.380556	0.666154
AT1G17550	15.8941	16.4463	0.966428	0.560173	0.801208
AT1G17560	7.33158	8.65571	0.847022	0.154148	0.403523
AT1G17580	4.70063	5.02299	0.935823	0.708799	0.881954
AT1G17590	1.59861	1.94843	0.820459	0.292794	0.582432
AT1G17600	1.01565	0.993085	1.02273	0.556984	0.799371
AT1G17620	16.5905	18.1024	0.916484	0.412391	0.696778
AT1G17630	1.046	1.11857	0.935118	0.893786	0.965355
AT1G17640	1.71299	1.65191	1.03698	0.638699	0.847029
AT1G17650	32.2092	30.1051	1.06989	0.00941805	0.0551664
AT1G17665	11.9558	10.5752	1.13055	0.0433649	0.174217
AT1G17680	4.73196	4.60866	1.02676	0.282303	0.570427
AT1G17690	5.52261	4.98668	1.10747	0.04718	0.184512
AT1G17700	2.23099	2.80733	0.794703	0.304322	0.595373
AT1G17720	19.406	21.9747	0.883104	0.0779826	0.261651
AT1G17730	14.7474	14.0611	1.04881	0.17358	0.433204
AT1G17760	4.10104	4.65338	0.881303	0.453679	0.732069
AT1G17780	3.1381	4.13483	0.758944	0.0746582	0.253382
AT1G17790	2.39907	2.58498	0.928081	0.786032	0.920362
AT1G17820	4.59529	4.70977	0.975692	0.7643	0.911321
AT1G17840	27.0147	26.1899	1.03149	0.0580052	0.213474
AT1G17850	5.27617	6.27149	0.841294	0.152029	0.400159
AT1G17860	5.0336	5.09993	0.986992	0.866034	0.953348
AT1G17870	1.01731	0.645642	1.57565	0.0186262	0.0933978
AT1G17880	129.434	129.825	0.996985	0.248382	0.531483
AT1G17920	1.87873	1.93166	0.972596	0.90596	0.970205
AT1G17930	2.73797	2.74684	0.996771	0.721716	0.887506
AT1G17940	3.37617	3.46146	0.97536	0.858638	0.950251
AT1G17970	5.75002	5.6575	1.01635	0.514383	0.77308
AT1G17980	6.52298	7.03852	0.926754	0.630096	0.84299
AT1G18030	3.21438	3.43217	0.936544	0.925725	0.977932
AT1G18040	3.188	4.33586	0.735264	0.0250487	0.117105
AT1G18060	53.6377	52.0699	1.03011	0.0726779	0.249281
AT1G18070	37.3471	40.0678	0.932098	0.537981	0.787648
AT1G18090	2.22462	2.2245	1.00005	0.769006	0.913002
AT1G18150	21.8153	20.1731	1.0814	0.011493	0.0643125
AT1G18160	7.66942	7.31178	1.04891	0.0920022	0.293112
AT1G18180	1.54783	1.4215	1.08887	0.483176	0.753178
AT1G18190	3.64576	3.41901	1.06632	0.205733	0.478382
AT1G18260	15.0338	14.1029	1.06601	0.016735	0.0861265
AT1G18265	6.50366	5.64496	1.15212	0.103414	0.314607
AT1G18270	5.70984	5.87813	0.97137	0.730031	0.892272
AT1G18300	2.22464	2.04054	1.09022	0.46751	0.741911
AT1G18335	2.49599	2.60006	0.959972	0.998547	0.999797
AT1G18340	4.39562	4.21089	1.04387	0.45977	0.736672
AT1G18360	12.6225	11.3482	1.11229	0.0232645	0.110863
AT1G18370	3.76451	3.47363	1.08374	0.0915985	0.29227
AT1G18390	0.944231	0.734095	1.28625	0.10935	0.325531
AT1G18400	3.82879	3.41031	1.12271	0.220611	0.496702
AT1G18420	2.17554	2.39771	0.907341	0.817541	0.933709
AT1G18440	8.60851	9.60469	0.896283	0.465868	0.741139
AT1G18450	13.9888	14.5852	0.959111	0.932008	0.980438
AT1G18460	4.5325	4.66026	0.972585	0.871738	0.956602
AT1G18470	8.66	7.70591	1.12381	0.0177583	0.0901769
AT1G18480	7.82853	7.59686	1.0305	0.363023	0.651308
AT1G18485	5.46269	5.14585	1.06157	0.0917782	0.292676
AT1G18490	6.07101	6.15718	0.986004	0.637387	0.846544
AT1G18500	21.5471	23.1532	0.930632	0.605558	0.827997
AT1G18550	1.79078	1.87436	0.955409	0.986191	0.996037
AT1G18560	1.68039	1.62216	1.0359	0.604152	0.827684
AT1G18570	2.42209	1.964	1.23325	0.0842391	0.27578
AT1G18580	6.04681	6.81344	0.887483	0.373428	0.660102
AT1G18600	8.90255	10.2072	0.872181	0.269835	0.556539
AT1G18610	2.34958	3.19806	0.734688	0.0230537	0.110108
AT1G18630	8.14835	10.1051	0.806361	0.102324	0.31252
AT1G18640	12.4413	13.985	0.889622	0.326036	0.617403
AT1G18660	13.0804	14.6365	0.893684	0.266269	0.551759
AT1G18670	2.84835	3.15553	0.902654	0.508461	0.770352
AT1G18680	4.09611	4.4817	0.913963	0.800354	0.927112
AT1G18690	1.32905	1.6579	0.801649	0.119949	0.345922
AT1G18700	7.19103	7.94977	0.904558	0.406812	0.691119
AT1G18710	3.03288	3.44477	0.880433	0.628393	0.842053
AT1G18730	68.6865	77.4054	0.887361	0.0547215	0.2048
AT1G18740	9.76755	10.1609	0.961288	0.959926	0.98807
AT1G18750	0.95711	1.58104	0.605367	0.0123121	0.0678561
AT1G18773	1.47767	1.56147	0.946332	0.97056	0.991158
AT1G18800	19.6359	18.694	1.05038	0.107909	0.3229
AT1G18840	6.28758	6.5329	0.962449	0.819642	0.934395
AT1G18870	1.0846	1.1946	0.907918	0.689093	0.871578
AT1G18880	0.694644	0.785543	0.884285	0.714395	0.88407
AT1G18890	6.85444	7.03116	0.974866	0.727018	0.890765
AT1G18900	3.39698	3.81176	0.891184	0.396744	0.682251
AT1G18910	1.16801	1.02069	1.14434	0.150293	0.398488
AT1G18950	7.12535	7.49731	0.950388	0.972133	0.991747
AT1G19000	62.29	65.7523	0.947344	0.995931	0.998846
AT1G19010	1.807	2.02243	0.89348	0.741245	0.898973
AT1G19020	2.20877	2.00408	1.10214	0.484035	0.753398
AT1G19050	22.7569	23.0821	0.985913	0.556083	0.79908
AT1G19070	0.632981	0.736176	0.859824	0.840166	0.941912
AT1G19080	2.73501	3.47951	0.786032	0.207827	0.480655
AT1G19100	3.35423	3.45745	0.970148	0.912932	0.972982
AT1G19110	10.7677	11.6969	0.920564	0.491967	0.759794
AT1G19120	15.0466	13.2999	1.13133	0.0456214	0.180247
AT1G19130	22.3179	24.1396	0.924534	0.73824	0.896987
AT1G19140	8.4799	10.7591	0.788159	0.0262106	0.121155
AT1G19170	5.5687	5.55377	1.00269	0.562109	0.801684
AT1G19180	3.26944	2.71882	1.20252	0.0770593	0.259278
AT1G19220	1.56515	1.80652	0.866387	0.340636	0.632251
AT1G19240	6.39832	6.44279	0.993098	0.72902	0.891655
AT1G19270	3.81168	3.10333	1.22825	0.0146217	0.0772874
AT1G19290	1.80785	1.96256	0.921168	0.793352	0.924066
AT1G19300	7.7363	9.88666	0.782499	0.0132772	0.071711
AT1G19310	7.91482	6.46897	1.22351	0.020461	0.100625
AT1G19330	6.91746	8.35824	0.827622	0.124246	0.354417
AT1G19340	1.88828	1.89311	0.99745	0.76522	0.911544
AT1G19360	6.0962	5.54266	1.09987	0.0938303	0.296741
AT1G19380	2.59282	2.93883	0.882263	0.665274	0.859248
AT1G19400	9.68129	10.4025	0.930667	0.757827	0.907259
AT1G19430	7.32795	6.85526	1.06895	0.0809122	0.268211
AT1G19440	12.4311	13.2753	0.936411	0.539507	0.788333
AT1G19480	2.12686	2.69263	0.789881	0.130161	0.364784
AT1G19485	2.51686	3.07537	0.818392	0.206312	0.478568
AT1G19510	1.73876	2.92674	0.594095	0.0476447	0.185594
AT1G19520	9.39008	9.06978	1.03532	0.180633	0.443346
AT1G19540	1.04702	1.20566	0.868423	0.609795	0.830811
AT1G19580	15.6772	16.5165	0.949184	0.955506	0.9867
AT1G19600	16.4858	15.9252	1.0352	0.15413	0.403523
AT1G19640	1.01132	1.18097	0.856345	0.7344	0.894652
AT1G19650	4.80031	5.25285	0.913847	0.675609	0.864432
AT1G19670	55.8939	62.114	0.89986	0.32812	0.619847
AT1G19680	6.45232	7.72473	0.835281	0.175923	0.436895
AT1G19690	8.6656	9.52682	0.9096	0.561774	0.801684
AT1G19700	4.36868	4.83645	0.903282	0.643842	0.84926
AT1G19710	5.35852	4.7375	1.13109	0.0607086	0.220381
AT1G19730	7.71635	7.89076	0.977897	0.838536	0.941692
AT1G19770	20.6141	19.4702	1.05875	0.112408	0.331671
AT1G19800	16.3953	18.4657	0.88788	0.211884	0.48629
AT1G19830	1.02982	1.60438	0.641882	0.162101	0.416731
AT1G19835	11.7591	11.289	1.04165	0.0780347	0.261721
AT1G19840	2.26449	2.15602	1.05031	0.603883	0.827432
AT1G19850	3.10052	3.67968	0.842606	0.126154	0.357736
AT1G19860	6.0815	6.68619	0.909562	0.510785	0.770981
AT1G19870	12.4532	12.1184	1.02763	0.0951407	0.298998
AT1G19880	14.1068	13.6337	1.0347	0.142085	0.384743
AT1G19940	2.3344	2.04541	1.14129	0.195051	0.463687
AT1G19950	5.99867	7.2881	0.823078	0.151705	0.399828
AT1G19960	94.2215	97.042	0.970935	0.216557	0.491904
AT1G19970	3.96893	4.69711	0.844973	0.348228	0.638697
AT1G19980	2.21501	1.83785	1.20521	0.14138	0.383926
AT1G19990	6.79062	7.13769	0.951375	0.998147	0.999596
AT1G20030	3.55748	2.78671	1.27658	0.0323506	0.140967
AT1G20050	26.9125	27.3548	0.983832	0.429345	0.711753
AT1G20060	0.780249	0.930374	0.83864	0.472939	0.745286
AT1G20070	7.32532	7.51897	0.974245	0.782442	0.918326
AT1G20090	26.7954	29.7451	0.900835	0.170917	0.429286
AT1G20100	20.7588	21.0481	0.986258	0.554575	0.798574
AT1G20110	16.8769	16.815	1.00368	0.360307	0.649068
AT1G20140	4.23165	4.86209	0.870335	0.465451	0.741139
AT1G20160	0.981901	1.03593	0.947848	0.944122	0.983606
AT1G20190	25.7942	24.0244	1.07367	0.0160416	0.0833498
AT1G20200	30.5245	31.8415	0.958641	0.936322	0.981624
AT1G20220	32.2697	34.1646	0.944536	0.950466	0.984836
AT1G20230	1.17844	1.19513	0.986037	0.858744	0.950306
AT1G20270	4.95601	5.67822	0.872811	0.404364	0.689233
AT1G20300	4.18757	4.6637	0.897906	0.512468	0.772242
AT1G20330	67.5631	68.7289	0.983038	0.540403	0.788992
AT1G20340	1961.14	2083.62	0.941216	0.477954	0.749629
AT1G20350	0.983335	0.418022	2.35235	0.0176287	0.0896274
AT1G20370	6.17846	5.41783	1.1404	0.0312278	0.137439
AT1G20380	2.45164	2.04208	1.20056	0.0568793	0.210344
AT1G20410	5.66152	6.47024	0.875009	0.347967	0.638624
AT1G20430	11.1171	12.2152	0.910106	0.666286	0.860026
AT1G20450	72.8569	73.1803	0.995581	0.188948	0.454519
AT1G20460	3.52845	3.40549	1.03611	0.483998	0.753398
AT1G20490	1.09307	1.1497	0.950747	0.749551	0.903945
AT1G20510	12.8378	12.1104	1.06006	0.0528324	0.199598
AT1G20540	8.08065	9.5215	0.848674	0.179729	0.442096
AT1G20550	1.74281	1.46694	1.18806	0.127358	0.359719
AT1G20575	7.70294	7.87979	0.977556	0.821218	0.934963
AT1G20580	45.1445	45.9139	0.983242	0.429211	0.711753
AT1G20610	3.42153	3.50525	0.976116	0.937423	0.981869
AT1G20650	6.00509	5.79469	1.03631	0.307458	0.598001
AT1G20670	4.95148	5.33193	0.928646	0.725447	0.889715
AT1G20696	80.95	83.8549	0.965357	0.772724	0.915171
AT1G20720	1.27927	1.14377	1.11847	0.201414	0.471474
AT1G20760	12.0669	13.2983	0.907398	0.300923	0.591872
AT1G20770	14.6478	14.0301	1.04402	0.142791	0.385841
AT1G20780	8.00507	7.27521	1.10032	0.022251	0.107128
AT1G20810	42.498	43.5336	0.976213	0.572772	0.808507
AT1G20816	7.57223	7.45397	1.01587	0.607084	0.828707
AT1G20830	10.492	11.9319	0.879329	0.288595	0.577706
AT1G20840	31.7279	35.7661	0.887094	0.0524893	0.19866
AT1G20850	13.6417	14.5113	0.940075	0.731538	0.89272
AT1G20870	1.28579	1.58819	0.80959	0.375929	0.662053
AT1G20880	2.08138	2.60033	0.80043	0.154848	0.404663
AT1G20890	2.46132	2.68478	0.916768	0.788275	0.921447
AT1G20910	6.12212	6.28574	0.973969	0.807982	0.929819
AT1G20920	10.9096	10.731	1.01664	0.132087	0.367788
AT1G20930	4.97922	6.18693	0.804797	0.0939136	0.296892
AT1G20950	22.5564	25.9522	0.869152	0.034288	0.146476
AT1G20960	23.5822	24.4529	0.964391	0.55535	0.798731
AT1G20980	17.5484	16.969	1.03414	0.0522	0.197922
AT1G21000	4.89053	4.66144	1.04915	0.263352	0.548285
AT1G21010	3.34039	2.99906	1.11381	0.305788	0.59683
AT1G21050	2.02595	2.22688	0.909771	0.810131	0.93065
AT1G21060	4.49541	4.63437	0.970014	0.811265	0.93088
AT1G21065	75.6481	73.9271	1.02328	0.097173	0.303482
AT1G21070	4.95784	5.32409	0.931208	0.811742	0.931012
AT1G21080	13.7171	15.8671	0.864497	0.0627973	0.225622
AT1G21090	2.90828	3.6038	0.807002	0.180763	0.443535
AT1G21150	1.63072	1.97548	0.82548	0.402431	0.68763
AT1G21160	3.56299	3.30218	1.07898	0.0501482	0.192665
AT1G21170	3.88188	3.88824	0.998367	0.527772	0.782268
AT1G21190	20.2936	21.003	0.966222	0.745967	0.901744
AT1G21200	3.01182	2.49416	1.20755	0.0332194	0.143322
AT1G21310	18.5506	26.6026	0.697322	0.0109013	0.0616679
AT1G21350	21.7041	24.0424	0.90274	0.291544	0.580959
AT1G21370	4.96063	4.83041	1.02696	0.449767	0.729673
AT1G21380	15.8639	15.4539	1.02653	0.241649	0.523749
AT1G21390	2.12168	2.49445	0.850562	0.518053	0.776001
AT1G21400	5.12853	5.49092	0.934003	0.940805	0.983316
AT1G21410	3.88736	4.22348	0.920415	0.828687	0.937745
AT1G21440	46.6208	44.7259	1.04237	0.040362	0.165357
AT1G21450	3.71292	3.72203	0.997554	0.565114	0.803214
AT1G21480	5.08814	5.35203	0.950693	0.96396	0.989413
AT1G21520	6.62571	5.52208	1.19986	0.0843215	0.275918
AT1G21540	2.20245	2.07808	1.05985	0.505255	0.768922
AT1G21550	4.69806	4.23834	1.10847	0.336504	0.628018
AT1G21560	6.62554	6.28247	1.05461	0.195706	0.464668
AT1G21580	5.42043	5.17567	1.04729	0.0231515	0.110513
AT1G21600	79.4702	86.4223	0.919557	0.228221	0.507
AT1G21610	5.34233	5.4968	0.971898	0.751039	0.904274
AT1G21650	3.44553	3.83634	0.898128	0.466562	0.741645
AT1G21660	14.0361	15.1131	0.928741	0.659091	0.856351
AT1G21670	12.6776	12.134	1.0448	0.153753	0.403056
AT1G21690	8.64782	10.0977	0.856413	0.179345	0.4416
AT1G21700	6.9435	6.72929	1.03183	0.209676	0.483418
AT1G21710	6.02307	7.16412	0.840727	0.209222	0.482702
AT1G21720	38.8941	39.1424	0.993657	0.324912	0.616054
AT1G21730	3.20799	3.10092	1.03453	0.354863	0.644298
AT1G21740	1.61062	1.85298	0.869205	0.432897	0.714601
AT1G21760	6.57013	7.6065	0.863752	0.311183	0.60197
AT1G21780	9.13761	10.2358	0.892711	0.394434	0.679933
AT1G21790	4.35184	4.64551	0.936783	0.894738	0.965433
AT1G21830	4.20831	5.47266	0.76897	0.0694186	0.241438
AT1G21840	1.827	1.96294	0.930748	0.916981	0.974365
AT1G21900	20.5664	21.4736	0.957752	0.82308	0.935404
AT1G21910	1.27858	0.772519	1.65509	0.0458322	0.180725
AT1G21920	6.64868	6.11426	1.08741	0.109256	0.325307
AT1G21930	11.6721	14.0383	0.831448	0.177277	0.43839
AT1G21980	6.84408	6.67525	1.02529	0.189365	0.455328
AT1G22020	5.98249	6.71218	0.891289	0.323835	0.615041
AT1G22030	2.62987	3.76314	0.69885	0.00839172	0.050719
AT1G22040	4.43547	5.02108	0.88337	0.441038	0.721668
AT1G22050	3.47965	4.02665	0.864155	0.510194	0.770977
AT1G22070	14.8417	14.2398	1.04226	0.16793	0.425089
AT1G22140	11.3562	13.6392	0.832613	0.150948	0.398972
AT1G22170	2.66263	3.0843	0.863287	0.509128	0.770668
AT1G22180	2.61034	2.86618	0.91074	0.674601	0.863787
AT1G22190	5.61895	7.5889	0.740417	0.00954079	0.0556894
AT1G22200	15.0032	16.2238	0.924764	0.643243	0.848975
AT1G22250	2.92383	3.83622	0.762165	0.235456	0.51592
AT1G22270	22.4955	20.5984	1.0921	0.0598569	0.21809
AT1G22280	17.0302	17.2769	0.98572	0.56045	0.801332
AT1G22300	81.3178	85.4517	0.951623	0.947858	0.984231
AT1G22310	3.10016	2.69056	1.15224	0.113466	0.333417
AT1G22330	8.76775	8.7964	0.996743	0.773074	0.915361
AT1G22370	4.31417	4.53206	0.951921	0.925812	0.977932
AT1G22380	0.956709	1.11155	0.860697	0.588612	0.819479
AT1G22400	4.22114	4.27357	0.987732	0.645832	0.84981
AT1G22410	56.8114	57.915	0.980944	0.254284	0.538506
AT1G22430	18.5193	20.4512	0.905534	0.287778	0.576551
AT1G22450	41.8109	39.5996	1.05584	0.0191236	0.0951817
AT1G22470	0.688489	0.502315	1.37063	0.440285	0.721127
AT1G22490	1.1964	1.68585	0.709675	0.0876722	0.283955
AT1G22500	1.46484	1.55951	0.939293	0.906739	0.970278
AT1G22510	3.04716	2.77792	1.09692	0.411612	0.695953
AT1G22520	14.674	16.1046	0.911172	0.640167	0.84735
AT1G22540	5.31804	5.12894	1.03687	0.317729	0.609021
AT1G22550	3.5834	3.19272	1.12236	0.272656	0.55952
AT1G22590	8.66505	9.32164	0.929563	0.650494	0.852723
AT1G22620	3.71471	3.90597	0.951033	0.927405	0.97828
AT1G22640	2.82784	2.13053	1.32729	0.0307947	0.136071
AT1G22650	3.66506	3.90799	0.937838	0.994974	0.99884
AT1G22660	3.27217	3.29494	0.99309	0.677374	0.865687
AT1G22690	24.7588	22.7678	1.08745	0.10584	0.319168
AT1G22700	60.0154	57.7525	1.03918	0.0241243	0.11399
AT1G22750	19.3943	18.991	1.02123	0.290801	0.580289
AT1G22790	9.0246	11.4	0.791634	0.0240416	0.113727
AT1G22800	5.07449	5.41766	0.936657	0.912234	0.972816
AT1G22830	0.862405	1.13132	0.7623	0.190756	0.457109
AT1G22840	84.7373	89.9487	0.942062	0.795569	0.925199
AT1G22850	57.2507	64.1373	0.892629	0.0729763	0.249947
AT1G22860	3.06394	3.38209	0.905929	0.526759	0.781575
AT1G22870	2.58757	3.15149	0.821061	0.125132	0.356128
AT1G22880	2.79906	3.19189	0.876927	0.537146	0.787054
AT1G22882	9.13288	9.11236	1.00225	0.506055	0.769274
AT1G22885	7.43635	9.5311	0.78022	0.0788111	0.263366
AT1G22890	4.50772	6.44291	0.69964	0.0323603	0.140967
AT1G22900	2.41212	2.19916	1.09684	0.542087	0.790618
AT1G22920	14.0191	13.6266	1.02881	0.237008	0.517834
AT1G22930	14.3515	13.9151	1.03136	0.0123718	0.068051
AT1G22940	11.7012	11.8667	0.986058	0.554623	0.798575
AT1G22950	7.75024	8.62291	0.898796	0.482465	0.752957
AT1G22960	2.2058	2.28109	0.966996	0.945783	0.984135
AT1G22970	5.63608	5.40113	1.0435	0.308691	0.599389
AT1G22985	1.58245	1.32817	1.19145	0.38029	0.665919
AT1G23000	2.29092	2.36457	0.968852	0.903696	0.968949
AT1G23030	10.3169	12.2315	0.843475	0.0160526	0.0833812
AT1G23040	1.1025	0.937961	1.17542	0.360371	0.649068
AT1G23050	0.725527	0.846678	0.856911	0.72243	0.887864
AT1G23080	26.9225	28.3795	0.948659	0.654786	0.85432
AT1G23090	13.3523	13.3122	1.00301	0.322544	0.613564
AT1G23100	6.61241	6.50634	1.0163	0.703064	0.878922
AT1G23140	2.15649	2.02529	1.06478	0.563776	0.802194
AT1G23150	0.909187	1.08779	0.835809	0.700761	0.877807
AT1G23170	4.91089	4.73339	1.0375	0.293929	0.583999
AT1G23190	40.2377	42.0732	0.956372	0.773522	0.915416
AT1G23200	0.707582	0.769529	0.919501	0.794067	0.924429
AT1G23220	12.0792	12.7906	0.944383	0.984166	0.995223
AT1G23230	5.98271	6.69355	0.893802	0.24481	0.527739
AT1G23260	16.5582	20.0106	0.827472	0.0476821	0.185654
AT1G23280	20.2861	18.6287	1.08897	0.0358498	0.151073
AT1G23310	362.805	392.668	0.92395	0.357169	0.646227
AT1G23330	3.29827	3.22224	1.02359	0.424327	0.707791
AT1G23360	12.4484	12.7876	0.973477	0.670476	0.861611
AT1G23380	1.56043	2.26125	0.690074	0.0581491	0.213582
AT1G23400	17.0904	19.0765	0.895886	0.208682	0.481851
AT1G23440	5.49604	5.22696	1.05148	0.185743	0.450229
AT1G23460	2.76353	2.63688	1.04803	0.427765	0.710389
AT1G23480	6.19397	5.329	1.16232	0.0171548	0.0879097
AT1G23530	2.72106	3.27727	0.830282	0.366599	0.654595
AT1G23710	4.2146	4.91078	0.858235	0.411099	0.695438
AT1G23750	6.54454	6.76036	0.968075	0.927596	0.97828
AT1G23780	11.074	11.4552	0.966723	0.809766	0.93063
AT1G23790	2.44828	2.34827	1.04259	0.548636	0.794729
AT1G23800	3.63776	4.12747	0.881352	0.488468	0.757385
AT1G23830	1.51284	1.78297	0.848494	0.581401	0.81471
AT1G23840	1.70676	1.09539	1.55812	0.0287696	0.129769
AT1G23860	7.50282	7.99729	0.938171	0.810275	0.93065
AT1G23870	2.58884	2.22136	1.16543	0.0946616	0.298102
AT1G23880	1.47315	1.50135	0.981219	0.852212	0.946821
AT1G23890	2.76705	3.22157	0.858913	0.401747	0.68667
AT1G23900	8.88515	8.93191	0.994764	0.389364	0.674631
AT1G23935	1.73532	1.66736	1.04076	0.557617	0.799937
AT1G23950	13.5001	16.0012	0.843695	0.0721217	0.24788
AT1G23960	14.0495	16.0209	0.87695	0.170164	0.428035
AT1G24040	7.76655	9.26395	0.838363	0.132998	0.369401
AT1G24050	32.799	33.7147	0.972837	0.558668	0.800828
AT1G24070	1.75962	2.50482	0.702494	0.0223904	0.107552
AT1G24090	1.36424	1.21897	1.11918	0.432061	0.713712
AT1G24095	1.16076	1.78278	0.651097	0.127594	0.360114
AT1G24100	41.9489	41.7442	1.0049	0.214231	0.489333
AT1G24120	22.1194	20.8561	1.06058	0.03731	0.15578
AT1G24145	0.711185	0.967153	0.735339	0.50396	0.768385
AT1G24147	42.7308	38.9602	1.09678	0.0109164	0.0617029
AT1G24148	7.19683	9.04489	0.795679	0.0568771	0.210344
AT1G24150	4.34562	3.85544	1.12714	0.0732877	0.250665
AT1G24160	14.6783	14.0869	1.04198	0.0737999	0.25169
AT1G24210	1.01662	1.40906	0.721484	0.341877	0.632981
AT1G24240	5.84898	6.1561	0.950111	0.911724	0.972656
AT1G24260	1.01745	1.72301	0.590505	0.0257985	0.119879
AT1G24267	14.2285	15.9778	0.890519	0.251962	0.535587
AT1G24280	4.89831	5.61328	0.872629	0.289427	0.578751
AT1G24290	2.50546	2.5854	0.969079	0.924917	0.977787
AT1G24300	7.07208	8.20847	0.861559	0.0525606	0.198797
AT1G24310	8.5618	9.31811	0.918835	0.62982	0.842755
AT1G24330	0.861991	1.10433	0.780557	0.237964	0.518854
AT1G24340	3.00892	3.17431	0.947897	0.997681	0.999404
AT1G24350	3.76181	4.63383	0.811815	0.204516	0.476714
AT1G24360	68.2212	68.8545	0.990803	0.207737	0.48058
AT1G24388	7.58171	8.35794	0.907127	0.504233	0.768563
AT1G24400	3.2958	3.17267	1.03881	0.501332	0.766533
AT1G24440	3.00378	2.86631	1.04796	0.514824	0.773252
AT1G24450	5.74214	5.79488	0.990898	0.774218	0.915712
AT1G24470	0.825759	0.945644	0.873224	0.796227	0.925563
AT1G24490	12.7858	15.106	0.846405	0.0382985	0.159077
AT1G24560	8.87792	8.43882	1.05203	0.0981965	0.305204
AT1G24575	9.88597	11.7467	0.841598	0.170699	0.429124
AT1G24577	2.06278	2.26577	0.910414	0.838926	0.941692
AT1G24580	0.427205	0.811101	0.526698	0.144167	0.388168
AT1G24600	0.983773	1.65615	0.594012	0.231977	0.5113
AT1G24610	15.3168	16.3944	0.934271	0.647469	0.850601
AT1G24625	10.1856	12.6655	0.804201	0.0483764	0.187574
AT1G24706	5.64241	5.24906	1.07494	0.0132142	0.0715365
AT1G24764	11.1623	12.2117	0.914073	0.456115	0.734024
AT1G24880	1.14655	1.65316	0.693554	0.194636	0.463094
AT1G25211	0.586924	0.667119	0.879789	0.918711	0.975144
AT1G25220	12.4422	14.6203	0.851021	0.094462	0.297868
AT1G25230	11.1148	10.5151	1.05703	0.335649	0.627119
AT1G25250	3.26815	4.2551	0.768056	0.0333425	0.14368
AT1G25277	1.00319	1.17	0.857432	0.750141	0.904121
AT1G25280	10.1961	10.9135	0.934269	0.699465	0.877528
AT1G25290	7.1385	8.02933	0.889054	0.436563	0.717791
AT1G25320	3.17868	2.85532	1.11324	0.178285	0.439833
AT1G25350	15.4701	16.9005	0.915362	0.407534	0.691827
AT1G25360	0.96457	0.823514	1.17129	0.252112	0.535593
AT1G25370	1.91761	2.80645	0.683286	0.044953	0.178505
AT1G25375	3.92809	3.79383	1.03539	0.385785	0.670929
AT1G25380	7.92672	9.38369	0.844733	0.0998709	0.308076
AT1G25390	5.10014	5.85931	0.870434	0.240568	0.522261
AT1G25400	1.69328	2.06512	0.819942	0.324211	0.615334
AT1G25420	8.701	9.50636	0.915282	0.617853	0.835529
AT1G25425	1.56434	2.42982	0.643806	0.0211078	0.102952
AT1G25450	14.8141	17.6342	0.840082	0.0153528	0.0803427
AT1G25470	3.92889	3.96008	0.992125	0.767208	0.911944
AT1G25480	2.69425	3.04599	0.884522	0.481389	0.752277
AT1G25490	34.0189	35.1699	0.967274	0.664324	0.858732
AT1G25500	1.9689	1.84219	1.06879	0.440333	0.721135
AT1G25530	2.04639	2.54871	0.802909	0.220263	0.496474
AT1G25540	4.452	5.12711	0.868326	0.241306	0.523142
AT1G25550	17.4221	17.3907	1.00181	0.461369	0.738093
AT1G25570	9.42879	11.406	0.826653	0.0209779	0.102467
AT1G25580	5.16926	5.06698	1.02019	0.355904	0.645522
AT1G25682	7.80959	7.41462	1.05327	0.309577	0.600064
AT1G26090	7.8885	7.86646	1.0028	0.562098	0.801684
AT1G26100	5.52636	6.42079	0.860698	0.474469	0.746885
AT1G26120	5.05908	5.22662	0.967946	0.824271	0.935615
AT1G26130	3.10092	2.77824	1.11615	0.0351857	0.149098
AT1G26160	13.7725	14.8425	0.927911	0.786444	0.920552
AT1G26170	5.31317	5.91497	0.898258	0.358593	0.647488
AT1G26180	10.2472	11.4651	0.893767	0.355335	0.644748
AT1G26190	4.18412	4.34062	0.963944	0.984303	0.995223
AT1G26210	16.0115	16.1047	0.99421	0.703888	0.879297
AT1G26230	12.1613	14.6701	0.828984	0.0131165	0.0711219
AT1G26260	1.8929	1.92122	0.98526	0.799151	0.926741
AT1G26300	2.73237	2.72194	1.00383	0.547448	0.794178
AT1G26330	0.84376	0.903313	0.934072	0.874489	0.957637
AT1G26340	8.45223	9.72117	0.869466	0.362107	0.650603
AT1G26370	5.057	5.10982	0.989663	0.718075	0.885362
AT1G26390	1.10901	0.901942	1.22958	0.288651	0.577749
AT1G26440	3.98859	3.69258	1.08016	0.227629	0.506462
AT1G26450	1.79234	2.04566	0.876167	0.66239	0.858047
AT1G26460	13.153	13.3672	0.983979	0.548655	0.794729
AT1G26470	12.206	11.9534	1.02113	0.435715	0.717279
AT1G26500	0.79992	1.17298	0.681958	0.150661	0.398873
AT1G26520	2.79664	2.9971	0.933114	0.866647	0.953621
AT1G26540	1.06425	1.42187	0.748484	0.136138	0.374061
AT1G26550	79.1485	89.6163	0.883193	0.0600879	0.218789
AT1G26570	5.66861	6.02527	0.940806	0.82966	0.93803
AT1G26580	13.9123	14.6797	0.947727	0.880729	0.959715
AT1G26600	1.44612	1.72884	0.836472	0.471931	0.744773
AT1G26620	2.8503	2.73574	1.04188	0.441535	0.722188
AT1G26640	9.73157	10.0096	0.972225	0.701023	0.877973
AT1G26650	11.3679	11.9859	0.948436	0.92779	0.97828
AT1G26660	3.14998	3.08287	1.02177	0.646573	0.850179
AT1G26665	14.9111	15.3943	0.96861	0.775143	0.915712
AT1G26670	22.7351	26.7963	0.848442	0.053589	0.201776
AT1G26690	8.38075	9.55685	0.876937	0.475353	0.747551
AT1G26730	1.03231	1.05607	0.977503	0.90097	0.968009
AT1G26740	14.4444	13.9782	1.03335	0.318911	0.610031
AT1G26750	20.0808	22.3991	0.8965	0.399129	0.684299
AT1G26760	1.98968	1.87012	1.06393	0.483862	0.753398
AT1G26761	11.8087	11.427	1.0334	0.214674	0.489812
AT1G26770	27.6137	26.3781	1.04684	0.0132806	0.071711
AT1G26810	1.75231	1.7597	0.995798	0.709292	0.881961
AT1G26820	3.47404	3.86662	0.898468	0.698808	0.877258
AT1G26830	13.9801	13.4274	1.04116	0.127319	0.359702
AT1G26840	3.68773	3.79455	0.97185	0.835719	0.940753
AT1G26850	61.3862	64.4514	0.95244	0.917541	0.974756
AT1G26880	54.3328	59.2514	0.916988	0.24437	0.527384
AT1G26900	1.26545	1.4779	0.856251	0.611645	0.831825
AT1G26910	9.00234	9.51289	0.946331	0.985125	0.995516
AT1G26930	0.838851	0.66481	1.26179	0.214785	0.489933
AT1G26940	7.6035	6.57051	1.15722	0.0713888	0.246216
AT1G26945	5.10587	5.29666	0.963979	0.96619	0.989887
AT1G26960	2.66551	3.45097	0.772393	0.136465	0.3747
AT1G27000	26.4661	24.7391	1.06981	0.0182911	0.0920476
AT1G27030	7.94507	8.64848	0.918666	0.636263	0.846005
AT1G27050	9.01229	7.97035	1.13073	0.0921186	0.293292
AT1G27060	2.82792	2.51471	1.12455	0.292632	0.582293
AT1G27070	3.47478	3.8461	0.903456	0.613639	0.83258
AT1G27100	15.9552	15.0453	1.06048	0.0488368	0.18875
AT1G27120	5.15836	6.39992	0.806004	0.0453589	0.179564
AT1G27130	27.411	28.2977	0.968663	0.592645	0.821914
AT1G27150	5.8902	5.70153	1.03309	0.308867	0.599423
AT1G27190	13.7404	14.0305	0.979322	0.456763	0.734644
AT1G27200	4.15323	4.63341	0.896366	0.575674	0.810742
AT1G27210	8.50379	7.51375	1.13176	0.0119729	0.0664114
AT1G27290	13.572	13.3097	1.01971	0.489466	0.757951
AT1G27300	5.63238	5.39072	1.04483	0.476682	0.748683
AT1G27310	47.9269	51.6045	0.928736	0.638546	0.847007
AT1G27320	14.4803	14.5968	0.992018	0.251692	0.535292
AT1G27330	30.8649	32.8053	0.94085	0.88217	0.960294
AT1G27340	16.5102	18.1957	0.90737	0.383222	0.668827
AT1G27385	18.0448	20.1075	0.897417	0.401803	0.686697
AT1G27390	17.8725	18.338	0.974612	0.775552	0.915712
AT1G27400	96.5377	106.115	0.909749	0.189578	0.455674
AT1G27410	2.50962	2.92405	0.858267	0.454308	0.73252
AT1G27420	1.04923	1.19901	0.87508	0.757007	0.9068
AT1G27430	7.10649	7.76183	0.915568	0.520745	0.777835
AT1G27435	20.4551	22.2988	0.91732	0.648263	0.851089
AT1G27440	2.68834	3.18921	0.842949	0.350471	0.640351
AT1G27450	81.0441	84.7564	0.9562	0.917995	0.974766
AT1G27470	6.75882	6.44592	1.04854	0.200257	0.470445
AT1G27500	1.94898	1.70615	1.14233	0.170801	0.429124
AT1G27510	16.6724	17.9307	0.929826	0.643725	0.84926
AT1G27520	5.46692	5.91416	0.924378	0.891709	0.964784
AT1G27530	28.6681	30.5525	0.938323	0.92842	0.978489
AT1G27540	22.5565	18.168	1.24155	0.070786	0.244691
AT1G27570	1.63675	1.70979	0.957284	0.736948	0.89626
AT1G27580	9.96156	8.3562	1.19212	0.323889	0.615041
AT1G27595	4.4526	4.77789	0.931919	0.709278	0.881961
AT1G27600	11.4621	10.9265	1.04901	0.144368	0.388521
AT1G27630	10.7567	10.2053	1.05403	0.105472	0.318674
AT1G27650	21.5496	23.9268	0.900646	0.324905	0.616054
AT1G27660	2.50218	3.27611	0.763766	0.0698824	0.242573
AT1G27690	4.68825	5.60233	0.836839	0.147667	0.394302
AT1G27695	3.91497	2.89822	1.35082	0.0767819	0.258552
AT1G27700	6.44801	7.08592	0.909975	0.6685	0.860701
AT1G27730	1.79451	1.28241	1.39933	0.0726659	0.249281
AT1G27750	4.33663	5.19788	0.834309	0.07484	0.253897
AT1G27752	7.81396	7.83431	0.997403	0.428311	0.710734
AT1G27760	15.8064	17.7623	0.889886	0.208619	0.481824
AT1G27770	14.1341	13.149	1.07492	0.0107049	0.0610517
AT1G27840	5.60264	6.22459	0.900081	0.523619	0.779289
AT1G27850	6.29771	6.79219	0.927199	0.667458	0.860464
AT1G27880	1.34525	1.72024	0.782014	0.141271	0.38372
AT1G27900	5.37373	5.39932	0.995262	0.545029	0.792382
AT1G27910	3.61487	3.57912	1.00999	0.582216	0.81523
AT1G27920	2.76629	3.58065	0.772565	0.0730911	0.250136
AT1G27940	1.04493	1.07353	0.973364	0.740367	0.898467
AT1G27950	94.7638	96.44	0.982618	0.366773	0.654595
AT1G27960	1.33085	1.72978	0.769379	0.139777	0.380783
AT1G27970	32.6757	39.1137	0.835403	0.00976744	0.0566775
AT1G27980	3.83195	3.6763	1.04234	0.439525	0.720514
AT1G28010	0.927167	0.753564	1.23038	0.0890752	0.286779
AT1G28060	9.19451	8.94395	1.02801	0.155281	0.405267
AT1G28070	2.95641	2.67144	1.10667	0.432472	0.713971
AT1G28090	5.93002	6.27232	0.945427	0.917703	0.974766
AT1G28100	2.98065	2.76664	1.07735	0.327235	0.618905
AT1G28110	6.12702	6.68237	0.916894	0.596762	0.823908
AT1G28120	12.364	13.0245	0.949281	0.964823	0.989443
AT1G28135	10.895	7.84304	1.38913	0.0181848	0.0917324
AT1G28140	40.1266	38.7622	1.0352	0.0358197	0.151027
AT1G28150	16.3872	16.114	1.01695	0.306008	0.596942
AT1G28190	1.4787	1.20288	1.2293	0.24573	0.528637
AT1G28200	10.025	11.4653	0.874375	0.303652	0.5948
AT1G28210	2.00724	2.06007	0.974356	0.900598	0.967826
AT1G28230	5.95784	7.10486	0.838558	0.219049	0.495086
AT1G28240	9.0972	10.679	0.851881	0.0652436	0.231293
AT1G28250	8.41304	9.76118	0.861888	0.343073	0.634077
AT1G28310	3.83508	4.51732	0.848972	0.252674	0.536429
AT1G28320	7.95465	8.05795	0.98718	0.564681	0.802942
AT1G28330	21.2895	19.342	1.10069	0.0197575	0.0977317
AT1G28340	12.9991	14.1829	0.916531	0.637491	0.846544
AT1G28350	8.27214	8.30213	0.996388	0.415566	0.699329
AT1G28370	0.787183	0.746645	1.05429	0.801499	0.92744
AT1G28380	12.7516	14.7131	0.866684	0.0832192	0.273755
AT1G28390	2.06513	2.40532	0.858569	0.453834	0.732178
AT1G28395	9.0077	8.75589	1.02876	0.417119	0.700678
AT1G28410	3.87652	4.41851	0.877337	0.436832	0.717991
AT1G28440	20.4271	20.2486	1.00882	0.242888	0.52569
AT1G28480	1.42723	1.32043	1.08088	0.640936	0.847863
AT1G28490	10.2781	9.68356	1.0614	0.189646	0.455676
AT1G28510	16.2987	17.6141	0.925319	0.695104	0.874797
AT1G28520	7.56661	7.90531	0.957155	0.961269	0.988388
AT1G28530	4.33655	4.47786	0.968444	0.871517	0.956489
AT1G28540	2.90851	2.89805	1.00361	0.74521	0.901272
AT1G28560	2.33361	2.69378	0.866294	0.487365	0.756197
AT1G28580	11.12	12.464	0.892171	0.361802	0.650369
AT1G28600	29.0404	32.9432	0.88153	0.0549496	0.205471
AT1G28680	10.291	12.8608	0.800187	0.0129422	0.0703815
AT1G28710	2.59877	3.0942	0.839886	0.253098	0.536718
AT1G28760	1.88928	2.18386	0.865111	0.55301	0.797552
AT1G28765	1.06222	1.36974	0.775489	0.364556	0.652846
AT1G28815	0.989976	1.5166	0.652761	0.228999	0.507907
AT1G28960	5.92752	6.51677	0.909579	0.638346	0.846943
AT1G29030	4.07434	4.36167	0.934124	0.86668	0.953621
AT1G29040	8.86357	9.28026	0.9551	0.933063	0.980703
AT1G29060	4.02307	4.47842	0.898324	0.648662	0.851414
AT1G29070	270.722	271.057	0.998766	0.119454	0.345146
AT1G29150	34.7288	32.9868	1.05281	0.00992894	0.0574162
AT1G29160	3.5676	3.38219	1.05482	0.482096	0.752821
AT1G29170	2.798	3.36672	0.831076	0.12941	0.363225
AT1G29195	0.944383	1.10791	0.852401	0.675644	0.864432
AT1G29220	9.22823	9.81979	0.939759	0.943928	0.983606
AT1G29240	4.95751	6.20991	0.798323	0.0297513	0.132911
AT1G29250	37.2934	36.659	1.0173	0.269108	0.555313
AT1G29260	9.94611	10.5047	0.946824	0.982485	0.994867
AT1G29270	0.551684	1.00354	0.549739	0.0877961	0.284049
AT1G29300	2.61672	3.70521	0.706227	0.00920807	0.0542681
AT1G29310	15.5177	14.3384	1.08225	0.0197882	0.0978514
AT1G29320	7.19078	6.6229	1.08574	0.114533	0.335722
AT1G29330	2.12063	2.745	0.772541	0.154805	0.404613
AT1G29340	17.9328	17.8294	1.0058	0.224603	0.502621
AT1G29350	5.10816	5.57516	0.916235	0.526986	0.781774
AT1G29355	4.26858	3.97915	1.07274	0.316368	0.607589
AT1G29370	5.21142	5.46709	0.953234	0.912315	0.972816
AT1G29395	78.7827	78.5768	1.00262	0.168833	0.426539
AT1G29410	1.77284	2.12544	0.834102	0.399862	0.684842
AT1G29418	11.8987	14.9174	0.797638	0.160352	0.413236
AT1G29430	3.26701	2.36698	1.38024	0.0739411	0.252012
AT1G29440	1.63973	1.80407	0.908904	0.820531	0.934757
AT1G29450	2.20344	2.0402	1.08001	0.476589	0.748683
AT1G29460	1.88425	1.27984	1.47226	0.0790292	0.263792
AT1G29465	2.85477	3.37792	0.845126	0.515946	0.77392
AT1G29470	60.9637	60.0154	1.0158	0.0199363	0.0984678
AT1G29500	2.29906	2.72887	0.842497	0.453123	0.731927
AT1G29510	2.56251	3.03031	0.845626	0.489498	0.757951
AT1G29520	8.87245	11.6407	0.762191	0.0183117	0.0921236
AT1G29530	16.9968	17.9414	0.947351	0.990252	0.99707
AT1G29550	5.82468	5.23303	1.11306	0.200655	0.470615
AT1G29560	1.06091	0.712327	1.48936	0.0206238	0.101199
AT1G29590	0.757933	0.61233	1.23779	0.320813	0.611372
AT1G29600	1.14184	1.3607	0.839156	0.702134	0.878478
AT1G29630	1.33799	1.45376	0.920367	0.815428	0.932777
AT1G29640	0.600188	1.05944	0.566517	0.127845	0.36052
AT1G29670	112.216	117.415	0.955719	0.775364	0.915712
AT1G29690	4.6395	5.09424	0.910735	0.544133	0.792085
AT1G29700	20.4437	21.6111	0.945979	0.77749	0.916173
AT1G29710	2.39844	2.36345	1.01481	0.638459	0.846958
AT1G29720	6.59485	6.20276	1.06321	0.0152856	0.0800852
AT1G29750	3.80119	3.56661	1.06577	0.136701	0.375163
AT1G29760	3.22104	3.47226	0.927649	0.809819	0.93063
AT1G29790	7.41509	8.06486	0.919432	0.651487	0.853387
AT1G29800	3.57289	3.43586	1.03988	0.368033	0.655715
AT1G29810	4.29344	4.95998	0.865615	0.54985	0.795152
AT1G29820	4.66808	3.87132	1.20581	0.0162725	0.084317
AT1G29840	3.54943	3.62341	0.979584	0.818373	0.933814
AT1G29850	29.1741	28.5891	1.02046	0.144771	0.388752
AT1G29880	41.6111	43.0122	0.967424	0.558661	0.800828
AT1G29890	7.65516	8.11159	0.943731	0.941931	0.983468
AT1G29900	32.828	34.4651	0.952502	0.969111	0.990746
AT1G29940	6.74532	6.88687	0.979448	0.733307	0.893709
AT1G29960	2.98032	2.6812	1.11156	0.318085	0.609335
AT1G29970	5.01819	4.8363	1.03761	0.371523	0.659442
AT1G29980	9.74931	11.3848	0.856347	0.128153	0.360616
AT1G29990	20.4911	20.3243	1.00821	0.39166	0.677106
AT1G30000	6.6359	6.52204	1.01746	0.356265	0.645845
AT1G30010	1.48436	1.7029	0.871669	0.500692	0.766468
AT1G30040	2.41069	2.11339	1.14067	0.199307	0.469107
AT1G30070	7.23119	7.63745	0.946807	0.969468	0.990746
AT1G30090	7.63639	7.12011	1.07251	0.134774	0.372248
AT1G30110	2.6938	2.98831	0.901447	0.746351	0.901973
AT1G30120	50.4933	54.6821	0.923397	0.414996	0.69907
AT1G30200	13.3654	13.985	0.95569	0.952219	0.985554
AT1G30210	19.3939	18.621	1.04151	0.114278	0.335322
AT1G30230	155.232	157.075	0.988266	0.265815	0.551157
AT1G30240	2.87507	2.95979	0.971376	0.938366	0.982201
AT1G30250	15.6519	17.8568	0.876522	0.219094	0.495122
AT1G30270	4.43719	4.16313	1.06583	0.221621	0.498151
AT1G30280	12.0611	10.7461	1.12237	0.0179104	0.0907222
AT1G30290	1.99228	1.53475	1.29812	0.0142292	0.0756651
AT1G30300	3.01657	3.49829	0.862299	0.494927	0.761828
AT1G30320	3.78663	3.64478	1.03892	0.279516	0.56765
AT1G30360	92.1036	95.8941	0.960471	0.897587	0.966787
AT1G30440	19.6454	18.4572	1.06438	0.0122165	0.0675283
AT1G30450	6.52687	6.81497	0.957726	0.988489	0.996504
AT1G30460	4.70149	5.51424	0.852609	0.159203	0.411563
AT1G30470	14.7217	15.0977	0.975098	0.685592	0.869835
AT1G30480	5.89975	6.22077	0.948395	0.976668	0.993634
AT1G30490	7.54497	8.82014	0.855425	0.0756136	0.255797
AT1G30500	3.25452	4.15156	0.783927	0.21279	0.487368
AT1G30510	8.796	10.0027	0.879363	0.248158	0.531393
AT1G30515	1.15569	1.31773	0.877032	0.817913	0.933709
AT1G30520	9.87709	10.6662	0.926014	0.70693	0.880739
AT1G30540	5.10157	4.78462	1.06624	0.182883	0.44613
AT1G30545	1.69978	1.96069	0.866932	0.542934	0.790968
AT1G30570	6.13765	6.51227	0.942475	0.760448	0.908975
AT1G30580	71.624	70.281	1.01911	0.0475176	0.185314
AT1G30590	8.22207	8.90172	0.923649	0.638879	0.847029
AT1G30600	3.82846	4.93664	0.775519	0.0213835	0.103844
AT1G30620	4.01664	4.2133	0.953323	0.911468	0.972656
AT1G30630	46.7764	49.8594	0.938166	0.777403	0.916156
AT1G30640	2.01035	1.97241	1.01924	0.606093	0.82818
AT1G30650	0.690652	1.08733	0.63518	0.0705548	0.244244
AT1G30680	13.2854	14.0675	0.944403	0.892584	0.964926
AT1G30690	31.3521	30.9106	1.01428	0.0989511	0.306641
AT1G30755	1.39657	1.36969	1.01963	0.603231	0.827011
AT1G30810	4.64015	4.67298	0.992975	0.539104	0.788333
AT1G30820	5.54896	5.61353	0.988498	0.668146	0.860613
AT1G30825	5.34776	5.55437	0.962802	0.950257	0.984836
AT1G30845	2.22184	2.1797	1.01934	0.742485	0.899347
AT1G30860	2.09241	1.76571	1.18503	0.103184	0.314248
AT1G30880	25.5774	24.2182	1.05613	0.129272	0.36296
AT1G30890	9.47509	9.96203	0.95112	0.912337	0.972816
AT1G30910	13.4818	15.5828	0.865168	0.219747	0.495947
AT1G30960	2.11039	1.51718	1.391	0.0200757	0.0990397
AT1G30970	7.83186	9.08509	0.862057	0.156128	0.406433
AT1G31010	2.9166	2.7551	1.05862	0.477384	0.749015
AT1G31020	4.95875	6.35143	0.780731	0.18705	0.451828
AT1G31070	9.91511	11.059	0.896561	0.351534	0.641558
AT1G31120	2.65538	2.7592	0.962372	0.879776	0.959363
AT1G31130	16.423	19.1865	0.855968	0.0581857	0.213623
AT1G31150	2.89225	2.81723	1.02663	0.454556	0.732778
AT1G31160	18.7582	19.3585	0.968989	0.760154	0.908801
AT1G31170	13.5667	16.7225	0.811281	0.016649	0.085763
AT1G31175	2.32974	2.59093	0.89919	0.651337	0.853324
AT1G31200	3.80256	3.63119	1.04719	0.658716	0.856351
AT1G31220	6.73146	7.47646	0.900354	0.570414	0.806854
AT1G31230	28.1763	27.684	1.01779	0.0410356	0.167341
AT1G31300	10.386	12.8566	0.807835	0.0133512	0.0719996
AT1G31310	1.12242	1.84593	0.608049	0.0275165	0.125566
AT1G31320	1.47962	1.89834	0.77943	0.3804	0.665977
AT1G31335	4.23404	4.19603	1.00906	0.663699	0.858592
AT1G31340	34.2391	35.2302	0.971868	0.704155	0.879328
AT1G31360	1.84173	1.90733	0.965606	0.824922	0.935881
AT1G31410	13.3342	14.298	0.932592	0.731183	0.8925
AT1G31430	0.727984	0.739199	0.984829	0.809997	0.930643
AT1G31440	8.7083	8.71885	0.99879	0.313136	0.604257
AT1G31460	1.2812	1.463	0.875741	0.641726	0.847969
AT1G31470	1.12601	1.71647	0.656004	0.0391571	0.161722
AT1G31480	2.37118	2.18249	1.08646	0.217615	0.493571
AT1G31500	9.00617	9.88643	0.910963	0.571979	0.808051
AT1G31540	5.01936	5.27847	0.950912	0.856786	0.949578
AT1G31550	12.6497	15.1526	0.834822	0.0906664	0.290299
AT1G31600	3.21218	4.43211	0.724751	0.0171648	0.0879344
AT1G31650	9.87717	10.8511	0.910242	0.47967	0.750667
AT1G31730	15.302	15.5341	0.985054	0.372441	0.659749
AT1G31750	1.30076	2.20717	0.589335	0.0353944	0.149685
AT1G31760	1.48164	1.24354	1.19147	0.261853	0.546996
AT1G31770	2.39382	3.04388	0.786438	0.0589658	0.215921
AT1G31780	14.83	15.2475	0.972617	0.86264	0.95191
AT1G31790	1.72063	1.67509	1.02719	0.730428	0.892337
AT1G31810	5.77331	6.33337	0.911571	0.401141	0.685914
AT1G31812	234.473	257.803	0.909506	0.118339	0.343106
AT1G31814	1.29116	1.47523	0.875231	0.590338	0.820862
AT1G31817	13.8146	14.662	0.942204	0.941359	0.983468
AT1G31820	1.35513	1.5168	0.893413	0.80228	0.927999
AT1G31830	6.27637	6.78237	0.925394	0.738703	0.89729
AT1G31835	3.85463	4.76682	0.808636	0.572891	0.808587
AT1G31850	24.0274	25.7499	0.933109	0.597385	0.824313
AT1G31860	12.6354	13.2684	0.952296	0.901443	0.968339
AT1G31870	5.38006	5.70138	0.943641	0.960111	0.98807
AT1G31910	18.9786	20.288	0.935461	0.835085	0.940297
AT1G31930	6.56545	6.8084	0.964317	0.864434	0.952535
AT1G31940	10.8524	11.6409	0.932267	0.77647	0.915872
AT1G31970	38.7623	38.7826	0.999478	0.294799	0.585035
AT1G32050	51.4393	57.4098	0.896003	0.142139	0.384743
AT1G32070	36.2471	39.3727	0.920617	0.556219	0.799092
AT1G32080	189.968	211.397	0.89863	0.0310342	0.136858
AT1G32090	9.15811	9.14649	1.00127	0.530302	0.783715
AT1G32120	1.58492	2.2234	0.712838	0.00966169	0.0561803
AT1G32127	1.82139	1.74007	1.04674	0.633167	0.844632
AT1G32150	3.49072	4.12156	0.846942	0.317023	0.60843
AT1G32160	38.0296	39.0385	0.974157	0.778734	0.916828
AT1G32170	1.33702	1.59299	0.839314	0.44075	0.721537
AT1G32190	2.57455	2.86994	0.897072	0.572493	0.808432
AT1G32210	14.5049	14.6285	0.991546	0.502123	0.766977
AT1G32230	25.7118	27.6105	0.931233	0.60606	0.82818
AT1G32260	5.83248	6.12859	0.951683	0.95362	0.986214
AT1G32310	5.93052	6.36632	0.931546	0.944419	0.983639
AT1G32330	4.57203	5.30416	0.861971	0.258787	0.543655
AT1G32340	4.19418	3.94073	1.06432	0.218919	0.494926
AT1G32360	11.1451	10.2355	1.08886	0.0451079	0.178889
AT1G32370	3.226	3.25095	0.992322	0.717579	0.885076
AT1G32380	3.86312	4.47956	0.862387	0.391283	0.676706
AT1G32400	28.354	28.7026	0.987853	0.487088	0.755931
AT1G32410	13.8257	15.2072	0.909149	0.510557	0.770977
AT1G32415	0.902677	1.09386	0.825225	0.405905	0.690467
AT1G32440	15.2881	16.991	0.899776	0.367216	0.654829
AT1G32450	2.75165	2.81781	0.976523	0.73925	0.897631
AT1G32460	13.171	11.527	1.14262	0.10378	0.31515
AT1G32490	6.19113	6.42838	0.963093	0.820944	0.934786
AT1G32500	43.5761	44.9292	0.969884	0.574942	0.810183
AT1G32550	37.2509	40.4977	0.919828	0.505374	0.768936
AT1G32580	21.7218	25.3845	0.855713	0.0557212	0.207386
AT1G32610	0.947201	1.09407	0.865762	0.628112	0.841805
AT1G32690	0.925227	0.926927	0.998166	0.836314	0.940998
AT1G32700	7.23762	6.70272	1.0798	0.146574	0.392383
AT1G32730	2.99236	3.00981	0.994202	0.787541	0.920973
AT1G32740	0.75996	0.979969	0.775494	0.429251	0.711753
AT1G32750	6.04306	5.74493	1.05189	0.0344342	0.146765
AT1G32760	1.57872	1.66026	0.950891	0.990184	0.99707
AT1G32790	27.2357	26.4306	1.03046	0.0483474	0.187505
AT1G32810	5.60067	5.50486	1.0174	0.302051	0.593325
AT1G32860	4.36397	4.45929	0.978624	0.939368	0.98267
AT1G32870	3.415	4.18403	0.816198	0.166424	0.422679
AT1G32900	1.30569	1.64506	0.793704	0.227725	0.506462
AT1G32920	5.42058	5.92849	0.914327	0.655762	0.854853
AT1G32928	1.03583	1.06664	0.971115	0.949286	0.984704
AT1G32930	1.80805	2.12957	0.849024	0.442831	0.723227
AT1G32940	1.8841	1.89095	0.99638	0.657301	0.855796
AT1G32990	221.73	234.632	0.945014	0.697306	0.876355
AT1G33050	6.78823	6.59408	1.02944	0.260121	0.54518
AT1G33060	3.0466	3.12041	0.976345	0.764318	0.911321
AT1G33080	2.54885	2.28534	1.11531	0.233471	0.513042
AT1G33120	77.9557	74.0112	1.0533	0.0161588	0.0838549
AT1G33140	109.068	115.509	0.94424	0.704996	0.879906
AT1G33170	11.6335	11.1785	1.0407	0.134487	0.371821
AT1G33230	7.51524	7.8298	0.959826	0.884274	0.961513
AT1G33240	20.8699	19.4436	1.07336	0.0199148	0.0984195
AT1G33250	5.85109	5.99703	0.975666	0.899492	0.967619
AT1G33260	1.88525	1.91365	0.985155	0.813586	0.932167
AT1G33265	12.4394	12.3098	1.01053	0.53692	0.787054
AT1G33270	7.58057	8.94102	0.847842	0.139447	0.380214
AT1G33290	19.1992	20.362	0.942894	0.930427	0.979456
AT1G33330	10.4716	11.9093	0.879277	0.320172	0.610983
AT1G33340	1.65666	1.50304	1.10221	0.415941	0.69968
AT1G33360	3.80637	4.18843	0.908781	0.666567	0.860124
AT1G33390	3.2581	2.94173	1.10754	0.0584773	0.214553
AT1G33400	3.09043	3.30133	0.936116	0.901916	0.968512
AT1G33410	7.11244	7.22653	0.984212	0.505815	0.769125
AT1G33420	4.42649	3.87456	1.14245	0.0458182	0.180725
AT1G33430	0.583818	1.06446	0.548463	0.0279435	0.127066
AT1G33440	2.44528	2.55798	0.955945	0.876574	0.958072
AT1G33480	3.33588	3.72747	0.894945	0.756595	0.906707
AT1G33490	7.74784	9.41198	0.823189	0.144785	0.388752
AT1G33520	12.5652	13.2603	0.947581	0.887991	0.963782
AT1G33560	2.58088	2.39222	1.07886	0.198202	0.467866
AT1G33590	34.5005	32.7705	1.05279	0.203243	0.474626
AT1G33600	12.6763	11.6959	1.08383	0.0893929	0.287471
AT1G33610	2.72679	2.54095	1.07314	0.449682	0.729673
AT1G33680	12.7255	14.3786	0.885031	0.164934	0.421235
AT1G33780	7.60803	8.43899	0.901533	0.633895	0.845043
AT1G33800	1.21582	1.52511	0.797199	0.366939	0.654626
AT1G33810	54.7125	50.9892	1.07302	0.020463	0.100625
AT1G33930	3.6119	2.61606	1.38066	0.0175193	0.0892602
AT1G33980	8.97326	10.0033	0.897033	0.385889	0.67104
AT1G33990	17.3575	16.7163	1.03836	0.0909388	0.290828
AT1G34000	85.4879	92.5137	0.924057	0.399355	0.684299
AT1G34010	8.66305	11.0499	0.783995	0.0298636	0.133307
AT1G34020	5.44712	5.86513	0.928731	0.732659	0.893439
AT1G34030	108.75	108.308	1.00408	0.165364	0.421646
AT1G34060	0.699527	1.02523	0.682314	0.14846	0.395855
AT1G34065	3.64984	3.89606	0.936804	0.905358	0.969994
AT1G34110	2.36913	2.36986	0.999691	0.572264	0.80838
AT1G34120	2.71598	2.66532	1.01901	0.573749	0.809253
AT1G34130	18.2662	18.0926	1.0096	0.255534	0.539907
AT1G34150	3.32218	3.65184	0.909726	0.702108	0.878478
AT1G34160	1.57199	1.55107	1.01348	0.641746	0.847969
AT1G34190	14.2287	13.8034	1.03082	0.187075	0.451828
AT1G34200	3.5806	3.72688	0.96075	0.793438	0.924066
AT1G34210	4.77143	5.82014	0.819813	0.0884329	0.285423
AT1G34220	7.66764	7.97163	0.961866	0.992701	0.997785
AT1G34245	3.14085	2.92714	1.07301	0.568867	0.80585
AT1G34260	3.99657	3.74388	1.06749	0.141919	0.384519
AT1G34270	3.2391	2.97096	1.09025	0.306234	0.597162
AT1G34300	4.59786	4.78902	0.960084	0.95623	0.987022
AT1G34315	0.831393	1.36477	0.609181	0.173107	0.432399
AT1G34320	9.85293	10.6343	0.926521	0.648873	0.85162
AT1G34340	5.16549	5.86525	0.880694	0.446995	0.727505
AT1G34350	6.32997	6.29574	1.00544	0.630053	0.84299
AT1G34360	3.69107	4.08013	0.904645	0.500596	0.766458
AT1G34370	14.3617	15.5419	0.924064	0.565421	0.803446
AT1G34380	7.93176	9.02366	0.878997	0.34547	0.636266
AT1G34420	1.15756	0.871823	1.32775	0.0686542	0.23964
AT1G34430	51.5759	53.1104	0.971106	0.488277	0.757332
AT1G34470	5.04685	5.22801	0.965349	0.843468	0.942945
AT1G34550	9.98534	10.5543	0.94609	0.889397	0.964313
AT1G34570	15.3464	15.0784	1.01778	0.374127	0.660492
AT1G34630	3.00039	2.63815	1.13731	0.189885	0.456055
AT1G34640	5.52773	5.85757	0.94369	0.982899	0.994926
AT1G34750	9.83148	9.38693	1.04736	0.156168	0.406469
AT1G34770	2.43262	2.72762	0.891848	0.58234	0.81523
AT1G34780	6.58653	7.6813	0.857476	0.245	0.528082
AT1G35180	2.16335	2.27152	0.95238	0.986068	0.995973
AT1G35190	4.40946	4.61333	0.955809	0.980672	0.99465
AT1G35210	1.03784	0.735032	1.41196	0.200791	0.470867
AT1G35220	4.47428	5.06506	0.883362	0.258227	0.543204
AT1G35230	1.32724	1.05456	1.25857	0.329334	0.620708
AT1G35260	2.77723	3.86402	0.71874	0.0910822	0.29112
AT1G35290	0.544893	1.33387	0.408505	0.00832604	0.0504945
AT1G35310	0.839565	1.01848	0.824335	0.700408	0.877671
AT1G35320	0.719738	0.997489	0.72155	0.26801	0.553908
AT1G35350	2.07838	1.66327	1.24958	0.0303993	0.134873
AT1G35430	2.16657	2.38974	0.906612	0.818628	0.933851
AT1G35460	4.9602	5.14311	0.964436	0.787484	0.920973
AT1G35470	5.44392	5.34308	1.01887	0.44936	0.729303
AT1G35516	11.5659	13.8672	0.834047	0.159795	0.412399
AT1G35560	4.60338	5.43765	0.846575	0.475449	0.747585
AT1G35660	1.28661	1.09099	1.1793	0.0580327	0.213503
AT1G35680	380.983	382.408	0.996273	0.065659	0.232129
AT1G35780	7.02784	8.1349	0.863912	0.0694192	0.241438
AT1G35830	0.847435	1.10587	0.76631	0.366594	0.654595
AT1G35910	0.765635	0.758719	1.00912	0.869873	0.955832
AT1G36050	11.5742	11.9542	0.968212	0.828811	0.937759
AT1G36070	2.37359	2.52957	0.938338	0.926501	0.97828
AT1G36160	17.9665	20.3206	0.884154	0.0608175	0.220537
AT1G36180	1.01918	0.879575	1.15871	0.0621216	0.223816
AT1G36280	7.4255	7.02736	1.05666	0.171659	0.430122
AT1G36310	17.369	16.8049	1.03357	0.169888	0.427597
AT1G36370	10.3588	11.6309	0.89063	0.397473	0.68298
AT1G36380	4.33403	5.11698	0.84699	0.463424	0.73962
AT1G36390	27.1213	28.3393	0.957018	0.914779	0.97331
AT1G36730	52.9954	57.7233	0.918095	0.248681	0.531852
AT1G36940	1.38518	1.21487	1.14019	0.552225	0.796762
AT1G36980	31.8294	32.3431	0.98412	0.633472	0.844895
AT1G36990	6.42923	6.81811	0.942964	0.876604	0.958072
AT1G38131	2.26112	2.9835	0.757877	0.0414401	0.168459
AT1G41880	77.6713	85.0671	0.91306	0.243308	0.52619
AT1G42430	10.4687	12.1492	0.861677	0.151289	0.399443
AT1G42440	11.369	10.4726	1.0856	0.0193476	0.0961539
AT1G42470	4.07585	4.55755	0.894306	0.290622	0.580203
AT1G42480	11.6188	12.9617	0.896398	0.443724	0.723825
AT1G42540	5.04933	4.51709	1.11783	0.0434639	0.174448
AT1G42550	42.2422	45.3599	0.931267	0.893993	0.965355
AT1G42990	15.4188	15.3255	1.00609	0.348622	0.638849
AT1G43130	7.8128	8.25464	0.946473	0.853196	0.947227
AT1G43190	23.1951	25.2997	0.916814	0.354919	0.644298
AT1G43245	1.01007	1.35372	0.746147	0.150929	0.398972
AT1G43560	73.1355	79.6718	0.91796	0.288742	0.577863
AT1G43580	9.38687	10.8609	0.864279	0.199514	0.469223
AT1G43605	1.79196	2.17112	0.825363	0.475721	0.747664
AT1G43620	10.2985	9.5102	1.08289	0.0329817	0.142638
AT1G43650	0.79146	0.84137	0.94068	0.945981	0.984193
AT1G43690	17.1553	17.5381	0.978175	0.532191	0.784726
AT1G43700	11.0886	11.7965	0.939994	0.933885	0.980788
AT1G43710	36.3433	37.8999	0.958928	0.805013	0.929186
AT1G43770	0.945467	0.874324	1.08137	0.432288	0.713772
AT1G43790	7.92879	9.57585	0.827998	0.224192	0.502114
AT1G43850	7.49512	8.79477	0.852224	0.0562254	0.208698
AT1G43860	3.80608	3.31863	1.14688	0.0273358	0.124844
AT1G43890	25.8429	26.5875	0.971994	0.797933	0.926311
AT1G43900	14.5092	16.6876	0.86946	0.193544	0.461534
AT1G44100	9.41247	10.8712	0.865818	0.0970671	0.303353
AT1G44110	5.61848	5.54821	1.01267	0.580695	0.814262
AT1G44120	0.778434	0.739673	1.0524	0.38866	0.674045
AT1G44170	16.9672	19.2332	0.882182	0.0987885	0.30625
AT1G44350	3.47995	3.27715	1.06189	0.374681	0.660787
AT1G44575	710.714	787.988	0.901934	0.0186466	0.0934446
AT1G44750	6.44464	6.73899	0.956321	0.937853	0.982064
AT1G44760	10.2795	13.2128	0.777996	0.0194922	0.0966438
AT1G44770	11.3476	10.7497	1.05562	0.13493	0.372434
AT1G44780	3.37934	2.58914	1.3052	0.013528	0.0727195
AT1G44790	15.3923	19.2455	0.799789	0.0309067	0.136371
AT1G44800	6.24249	7.38551	0.845235	0.110548	0.328281
AT1G44810	11.2714	12.3897	0.90974	0.592997	0.821914
AT1G44820	6.87666	7.94012	0.866065	0.186711	0.451538
AT1G44835	12.7336	12.945	0.983674	0.654775	0.85432
AT1G44890	1.91805	1.69609	1.13087	0.388954	0.674276
AT1G44900	7.1847	6.43995	1.11564	0.0181016	0.09145
AT1G44910	7.37236	7.36845	1.00053	0.454892	0.733109
AT1G44920	49.8639	57.0624	0.873848	0.128158	0.360616
AT1G44940	1.79091	1.6619	1.07762	0.910321	0.971886
AT1G44941	1.71497	1.1942	1.43608	0.536266	0.786714
AT1G44960	7.38768	7.98018	0.925753	0.789974	0.92247
AT1G44970	0.852665	1.18823	0.717592	0.214953	0.489983
AT1G45000	45.6062	47.141	0.967441	0.653775	0.853889
AT1G45050	4.52788	5.63585	0.803407	0.119909	0.345865
AT1G45110	2.5984	2.64039	0.984097	0.810981	0.93088
AT1G45130	9.62388	10.1374	0.949344	0.950092	0.984836
AT1G45145	15.6672	14.4382	1.08512	0.106614	0.320337
AT1G45150	3.22651	3.40758	0.946863	0.97852	0.994213
AT1G45160	8.73545	9.79651	0.89169	0.165071	0.421283
AT1G45170	6.69974	6.71864	0.997186	0.711185	0.882569
AT1G45180	2.46812	2.37954	1.03723	0.493485	0.760842
AT1G45207	5.4343	6.42509	0.845794	0.167436	0.424094
AT1G45229	0.943664	1.19917	0.786928	0.466968	0.741872
AT1G45230	40.8911	45.062	0.90744	0.263666	0.548667
AT1G45231	2.89785	3.14128	0.922508	0.886384	0.962859
AT1G45233	3.50847	3.31759	1.05754	0.361592	0.650234
AT1G45248	1.74656	1.50223	1.16264	0.322124	0.613105
AT1G45249	7.64513	8.90046	0.858959	0.219126	0.495127
AT1G45332	4.98211	5.17206	0.963274	0.879983	0.959456
AT1G45474	116.947	117.211	0.997745	0.158911	0.410996
AT1G45976	7.82835	8.13955	0.961766	0.912508	0.972877
AT1G46264	2.88385	3.95213	0.729695	0.0324186	0.141148
AT1G46480	1.75641	2.33886	0.75097	0.132811	0.369267
AT1G46768	0.97148	0.85312	1.13874	0.435914	0.717395
AT1G47056	4.16787	4.04892	1.02938	0.465239	0.741139
AT1G47128	178.003	196.59	0.905453	0.0683578	0.238934
AT1G47200	22.1309	25.2922	0.875008	0.150333	0.398488
AT1G47210	9.3464	11.4781	0.814279	0.02514	0.117366
AT1G47230	5.40823	5.95638	0.907973	0.635587	0.8456
AT1G47240	5.86761	7.00083	0.838131	0.133877	0.370683
AT1G47250	4.7997	4.53171	1.05914	0.412137	0.696419
AT1G47260	29.7266	28.4509	1.04484	0.014414	0.0765755
AT1G47270	4.26347	4.52318	0.942583	0.87404	0.957328
AT1G47271	0.594707	0.797428	0.745782	0.445291	0.725927
AT1G47278	8.8916	10.0949	0.880802	0.424003	0.707688
AT1G47290	7.53069	8.34404	0.902524	0.440435	0.72116
AT1G47310	6.18544	6.4087	0.965163	0.824422	0.935615
AT1G47330	4.61059	4.83159	0.95426	0.973358	0.992375
AT1G47340	1.7293	1.7956	0.963075	0.960167	0.98807
AT1G47370	1.63723	2.1596	0.758117	0.262639	0.547821
AT1G47380	5.35508	5.96418	0.897875	0.491632	0.759625
AT1G47395	1.57499	2.69551	0.584301	0.0300888	0.133956
AT1G47410	2.54136	2.81466	0.902901	0.690589	0.872435
AT1G47420	69.5848	68.2215	1.01998	0.0311717	0.137321
AT1G47480	0.744092	1.22103	0.609396	0.0860684	0.280487
AT1G47485	0.407251	1.03878	0.392045	0.0335633	0.144275
AT1G47490	21.4195	24.3678	0.879007	0.0870373	0.282745
AT1G47500	12.649	13.4408	0.941093	0.699493	0.877528
AT1G47530	23.9788	25.1031	0.955213	0.930836	0.979726
AT1G47550	10.8068	10.1135	1.06855	0.0098478	0.0570298
AT1G47570	4.24873	4.42703	0.959725	0.90037	0.967798
AT1G47580	13.6505	16.4341	0.83062	0.112741	0.332149
AT1G47640	19.6638	19.6033	1.00309	0.460855	0.737638
AT1G47655	0.882524	1.14019	0.774015	0.457955	0.735364
AT1G47710	17.7437	17.6173	1.00717	0.406843	0.691119
AT1G47720	2.46787	2.63723	0.935779	0.964354	0.989443
AT1G47740	9.61531	10.6536	0.902542	0.393612	0.679405
AT1G47750	7.04069	6.74235	1.04425	0.438951	0.719994
AT1G47820	3.30371	3.69588	0.893888	0.742169	0.899224
AT1G47830	17.6823	18.0994	0.976956	0.718414	0.885573
AT1G47840	0.951099	1.19973	0.792764	0.434946	0.716504
AT1G47870	4.05659	4.79372	0.846231	0.291457	0.580873
AT1G47960	3.45776	4.32224	0.799992	0.0994759	0.307628
AT1G47970	53.6865	53.4836	1.00379	0.150629	0.398861
AT1G48040	3.94761	4.9489	0.797674	0.0764609	0.257894
AT1G48050	5.41461	5.40156	1.00241	0.503531	0.76808
AT1G48090	5.92762	5.7857	1.02453	0.104256	0.316137
[truncated: 12,037 more rows]

## Sheet: F1CL_nonadditive_genes
Gene	Expression (FPKM)		Ratio	pvalue	padj
	MPV	F1CL
AT1G01120	24.2132	30.6301	0.790505	1.90757e-07	4.51181e-06
AT1G01130	3.46376	6.65138	0.520757	0.00334184	0.0243786
AT1G01240	38.5107	49.9741	0.770614	5.68985e-10	2.10462e-08
AT1G01300	2.62161	4.08465	0.64182	0.000789105	0.00736601
AT1G01390	22.7211	32.7728	0.693292	6.74405e-22	8.71176e-20
AT1G01500	102.371	125.127	0.818133	6.63922e-07	1.40419e-05
AT1G02150	5.17075	7.09687	0.728596	0.00153542	0.0128152
AT1G02205	1.94543	3.39425	0.573157	0.00148098	0.0124413
AT1G02280	1.00578	2.25417	0.446188	0.00117138	0.0102028
AT1G02300	158.078	185.804	0.85078	4.94583e-06	8.59786e-05
AT1G02305	5.08625	7.50431	0.677777	0.00267216	0.0203971
AT1G02330	2.25164	3.32309	0.677573	0.00653447	0.0417078
AT1G02500	13.5743	17.4793	0.776594	0.000144271	0.00170977
AT1G02610	7.37368	9.67717	0.761966	0.00624971	0.0404189
AT1G02660	43.7644	54.4973	0.803057	8.07263e-07	1.67156e-05
AT1G02780	171.896	206.543	0.832252	9.84433e-09	3.01709e-07
AT1G02880	122.495	143.247	0.855129	0.00141562	0.011964
AT1G02920	3.19534	5.89028	0.542477	1.22821e-06	2.42367e-05
AT1G02930	1.9033	2.80354	0.67889	0.00721148	0.0451033
AT1G03055	0.713923	1.6617	0.429633	0.0026557	0.0202899
AT1G03106	11.8831	16.1356	0.736449	3.28483e-05	0.00046708
AT1G03130	6.84105	9.37512	0.729702	0.00180158	0.0146793
AT1G03310	15.5558	21.7984	0.713624	1.20904e-07	2.96832e-06
AT1G03475	35.1827	40.3053	0.872905	0.00523416	0.0350302
AT1G03590	38.3067	48.2959	0.793166	5.5089e-05	0.000734798
AT1G03600	6.10931	7.79219	0.784031	0.00131867	0.0112809
AT1G03740	19.1072	23.841	0.801443	8.91586e-05	0.0011317
AT1G03820	83.0586	94.9121	0.875111	0.00448733	0.0309724
AT1G03940	6.94079	9.59225	0.723583	0.000800128	0.00745647
AT1G04280	28.3491	34.0316	0.833025	0.000249713	0.00276248
AT1G04350	93.2363	109.277	0.853213	0.000225513	0.00251463
AT1G04400	1.44264	2.2668	0.636422	0.00103337	0.00924036
AT1G04410	36.5252	43.914	0.831744	0.00166317	0.0137044
AT1G04420	9.87909	12.1565	0.812657	0.00709388	0.0444672
AT1G04480	110.783	131.773	0.840713	0.000355957	0.00375477
AT1G04520	13.6166	17.4516	0.780248	0.0011577	0.0101012
AT1G04680	66.2846	78.5953	0.843366	0.000834504	0.00770837
AT1G04690	11.8402	15.3023	0.773753	7.21101e-05	0.00093654
AT1G04800	34.485	41.6388	0.828193	0.00360499	0.0259934
AT1G04820	7.6138	11.4798	0.663235	6.70141e-08	1.75088e-06
AT1G04980	295.979	369.924	0.800108	1.26004e-10	5.18624e-09
AT1G05010	6.12714	8.6705	0.706666	2.83898e-06	5.19901e-05
AT1G05270	16.2917	19.7191	0.826189	0.00481572	0.0329143
AT1G05320	20.2302	25.7403	0.785933	0.00348284	0.0252754
AT1G05540	20.9194	25.8389	0.80961	0.000292848	0.0031646
AT1G05570	639.559	728.856	0.877484	0.000255673	0.00281727
AT1G05710	35.4234	61.9838	0.571494	1.61598e-26	2.68684e-24
AT1G05805	34.5526	45.1122	0.765926	3.4214e-08	9.46549e-07
AT1G06040	33.8762	40.7581	0.831151	0.000201223	0.00227318
AT1G06190	46.8881	58.2167	0.805407	1.05086e-06	2.11595e-05
AT1G06350	3.81421	5.50769	0.692525	6.41901e-05	0.000841487
AT1G06360	52.5124	62.0845	0.845822	0.000695331	0.00663071
AT1G06410	69.4166	97.7868	0.709877	1.24496e-14	8.49865e-13
AT1G06430	3.76492	6.92137	0.543956	2.09462e-08	6.02312e-07
AT1G06450	89.2034	112.654	0.791837	9.39888e-08	2.35927e-06
AT1G06460	5.05809	6.51592	0.776267	0.00606393	0.039439
AT1G06640	9.96786	12.8134	0.777924	0.000773718	0.00725868
AT1G06645	9.78615	14.6327	0.668786	2.75989e-06	5.06524e-05
AT1G06680	82.7744	97.5654	0.848399	0.00125936	0.0108507
AT1G06690	144.792	168.103	0.861324	0.0070521	0.0442548
AT1G06720	22.1945	28.7329	0.772443	7.72405e-10	2.78946e-08
AT1G06830	5.45509	6.88401	0.792428	0.00203549	0.0162307
AT1G06950	124.098	145.99	0.850047	2.67431e-05	0.000387153
AT1G07010	25.651	32.2699	0.794887	0.000553778	0.00550272
AT1G07050	246.488	295.408	0.834399	3.59332e-05	0.000504147
AT1G07135	99.0203	128.793	0.768831	1.92047e-09	6.52842e-08
AT1G07180	10.8386	14.0258	0.772762	3.86274e-05	0.00053609
AT1G07280	10.9239	15.1418	0.72144	3.71797e-07	8.26966e-06
AT1G07440	39.3212	47.8264	0.822165	0.00171586	0.0140833
AT1G07640	14.2376	20.3072	0.701114	5.97027e-06	0.000102409
AT1G07720	10.6578	14.2629	0.747241	0.000266763	0.00291082
AT1G07890	40.0789	51.5712	0.777157	6.86628e-08	1.78491e-06
AT1G07920	124.076	146.634	0.846161	0.000291763	0.00315694
AT1G08010	28.4931	39.9636	0.712976	1.20193e-15	9.09193e-14
AT1G08190	115.409	145.083	0.795472	1.45647e-07	3.50409e-06
AT1G08200	44.1463	52.3439	0.843389	0.00187381	0.0151501
AT1G08230	43.7458	59.1116	0.740055	5.36822e-12	2.72352e-10
AT1G08380	20.8937	25.9788	0.804259	0.00397564	0.0280871
AT1G08450	2.35629	5.63899	0.417856	4.87083e-05	0.000658454
AT1G08550	8.79629	11.0279	0.79764	0.00531577	0.0354518
AT1G08560	7.54088	10.7262	0.703032	0.00206706	0.0163814
AT1G08610	17.0395	19.8685	0.857614	0.00421817	0.0294291
AT1G08640	16.0194	20.3971	0.785377	0.000109811	0.00135892
AT1G08890	6.73304	12.5546	0.5363	1.11131e-07	2.75255e-06
AT1G08930	58.4357	79.7168	0.733041	6.1422e-09	1.94983e-07
AT1G08980	7.07639	10.305	0.686696	1.81824e-06	3.47368e-05
AT1G09160	2.54703	3.73256	0.682382	0.00349733	0.0253477
AT1G09200	335.442	434.376	0.772238	4.28394e-13	2.4637e-11
AT1G09210	18.4554	28.7004	0.643038	4.79653e-11	2.09761e-09
AT1G09240	0.998566	1.6727	0.59698	0.00527601	0.0352512
AT1G09430	62.2916	75.9342	0.820337	4.01582e-05	0.000555499
AT1G09490	4.84158	6.83032	0.708837	0.0044052	0.0304555
AT1G09570	63.3071	81.6899	0.774968	1.55478e-06	3.00109e-05
AT1G09640	30.2549	36.2931	0.833625	0.000379512	0.00397824
AT1G09780	2.72169	4.35423	0.625068	8.13315e-05	0.00104021
AT1G09795	46.0496	56.3438	0.817297	6.25705e-06	0.000106783
AT1G09900	12.0604	14.9077	0.809002	0.000266714	0.00291082
AT1G09932	24.2723	30.987	0.783305	0.00431358	0.0299454
AT1G09970	7.65985	9.95217	0.769666	0.00197874	0.015846
AT1G10020	376.073	427.263	0.88019	0.000831868	0.00769249
AT1G10060	21.8316	27.6423	0.789789	0.00656179	0.0418186
AT1G10340	3.80464	5.13599	0.740781	0.00534167	0.0355963
AT1G10360	1.81991	2.64745	0.68742	0.00591738	0.0386656
AT1G10450	33.7705	41.4162	0.815394	0.000179594	0.00206854
AT1G10470	8.78399	11.4459	0.767433	0.000472559	0.0048095
AT1G10550	62.1821	89.2448	0.696759	2.1728e-06	4.08597e-05
AT1G10590	13.7317	18.7413	0.732698	1.63614e-05	0.000248424
AT1G10610	3.01475	4.63802	0.650009	0.00150167	0.0125523
AT1G10640	5.95546	10.2633	0.580269	7.24743e-10	2.64005e-08
AT1G10760	7.7238	13.7342	0.562379	1.68473e-12	8.95307e-11
AT1G10960	7.26327	9.81105	0.740315	0.00337976	0.0246021
AT1G11130	10.5491	13.0168	0.810421	0.00675059	0.0426978
AT1G11210	38.4418	47.0073	0.817785	0.00120323	0.0104369
AT1G11260	19.0436	22.6272	0.841625	0.00424343	0.0295439
AT1G11330	110.598	125.489	0.881336	0.00099595	0.00896301
AT1G11350	11.3366	15.3045	0.74074	1.49873e-05	0.000230685
AT1G11580	5.32071	7.33438	0.725448	0.00058817	0.00573585
AT1G11700	15.1475	20.7189	0.731092	0.000249714	0.00276248
AT1G11720	14.1468	18.5649	0.762016	1.15169e-08	3.47847e-07
AT1G11740	41.0767	50.8782	0.807353	5.7755e-05	0.000765493
AT1G11820	7.08699	9.5644	0.740976	0.00160273	0.0132912
AT1G11850	37.6136	45.047	0.834986	0.000113167	0.00139633
AT1G11860	796.439	1039.85	0.765918	1.07957e-13	6.73948e-12
AT1G11930	64.9895	87.1759	0.745499	3.8361e-16	2.99974e-14
AT1G11950	6.816	10.4396	0.652901	1.35897e-08	4.03914e-07
AT1G12080	63.7418	73.4242	0.868131	0.00601049	0.0391673
AT1G12090	568.254	707.389	0.803312	2.79399e-15	2.03114e-13
AT1G12110	2.93512	4.40543	0.666251	0.00607532	0.0394978
AT1G12230	1.59108	2.71775	0.58544	4.25479e-05	0.000584225
AT1G12240	427.739	483.763	0.884193	0.00672787	0.0426123
AT1G12380	9.28662	14.4063	0.644622	3.0691e-05	0.000439007
AT1G12520	5.63581	8.66473	0.650432	1.43064e-06	2.78063e-05
AT1G12650	22.1031	29.7479	0.743016	7.95134e-09	2.48653e-07
AT1G12710	28.8426	35.7862	0.805971	7.42092e-05	0.000960829
AT1G12770	19.8599	25.6739	0.773543	9.43755e-05	0.00119161
AT1G12800	6.94016	9.04945	0.766915	0.00203116	0.0162116
AT1G12900	101.335	165.811	0.611151	2.8514e-71	2.08189e-68
AT1G12920	45.13	54.6206	0.826245	1.67866e-05	0.000253278
AT1G13000	87.5689	111.73	0.783756	1.24787e-07	3.05029e-06
AT1G13020	1145.87	1313.14	0.872616	0.00049345	0.00500091
AT1G13110	7.00639	11.5932	0.604356	3.457e-08	9.51695e-07
AT1G13160	34.216	42.7297	0.800753	0.00122176	0.0105812
AT1G13190	7.29763	9.58124	0.761658	0.00206592	0.01638
AT1G13210	4.7257	6.58784	0.717338	0.000591358	0.00576359
AT1G13220	44.6963	75.0509	0.595546	3.50091e-52	1.54712e-49
AT1G13260	33.2843	40.611	0.81959	0.000171854	0.00198893
AT1G13470	1.15501	2.74679	0.420494	0.000863504	0.00793696
AT1G13750	4.70308	6.4089	0.733837	0.00185857	0.0150559
AT1G13930	176.914	216.714	0.816347	2.48966e-11	1.12088e-09
AT1G13990	126.296	151.085	0.835922	5.17285e-05	0.000694941
AT1G14150	14.775	19.8274	0.745183	0.000668185	0.00641557
AT1G14170	0.423745	0.963303	0.439887	0.000733305	0.00692988
AT1G14200	9.97983	12.9728	0.769288	0.00128572	0.0110553
AT1G14250	219.213	300.666	0.729091	1.49948e-21	1.87916e-19
AT1G14320	35.1217	42.8083	0.82044	0.0062362	0.0403718
AT1G14345	3.83661	5.84962	0.655873	0.000594157	0.00578417
AT1G14350	18.2687	26.1588	0.698376	2.34627e-07	5.47234e-06
AT1G14360	7.2263	9.0023	0.802718	0.00492793	0.0334498
AT1G14460	12.3593	16.1613	0.764749	0.000570259	0.00561202
AT1G14700	22.888	32.016	0.714893	4.46896e-09	1.45723e-07
AT1G14900	69.0788	89.8042	0.769216	2.61257e-10	1.02268e-08
AT1G15125	23.5142	30.8413	0.762423	3.37445e-08	9.36648e-07
AT1G15140	10.2943	13.488	0.763218	0.00334652	0.0243915
AT1G15270	2.22376	5.00696	0.444134	1.97677e-15	1.48196e-13
AT1G15500	11.2786	16.9358	0.665963	1.03688e-09	3.68126e-08
AT1G15670	7.83991	10.8035	0.725681	2.26202e-07	5.29793e-06
AT1G15730	34.7735	40.7598	0.853133	0.000812158	0.00754576
AT1G15750	4.92313	8.80821	0.558926	4.68442e-08	1.25865e-06
AT1G15780	76.213	120.293	0.633563	3.48948e-48	1.36276e-45
AT1G15820	72.8466	89.8778	0.810506	3.58152e-07	8.02998e-06
AT1G15830	6.09936	9.62456	0.633729	5.20178e-06	9.00551e-05
AT1G15930	0.568904	1.17962	0.482279	0.00641692	0.0412168
AT1G15980	15.2588	18.3759	0.830368	0.00176051	0.0143865
AT1G16320	15.6383	20.6332	0.757919	3.27986e-07	7.40306e-06
AT1G16410	1.56109	2.64238	0.590791	0.0011089	0.00976496
AT1G16630	0.450393	1.20322	0.374322	0.00139001	0.011795
AT1G16710	541.211	723.803	0.747733	3.16016e-39	1.02055e-36
AT1G16880	40.4246	47.5539	0.85008	0.00202671	0.0161838
AT1G17100	1.90736	3.08669	0.617932	0.000945364	0.00858135
AT1G17110	1.06542	1.71235	0.622196	0.00680562	0.0429811
AT1G17290	35.9237	49.0219	0.732809	1.22701e-12	6.62547e-11
AT1G17360	15.7701	20.7286	0.760791	2.47873e-06	4.61478e-05
AT1G17440	11.8665	13.9912	0.848138	0.000770153	0.00723621
AT1G17500	169.447	196.314	0.863143	0.000794623	0.00740928
AT1G17745	84.4892	107.537	0.785676	1.53006e-09	5.29779e-08
AT1G17890	0.285732	1.66653	0.171453	9.15289e-11	3.8235e-09
AT1G18080	11.1397	13.8849	0.80229	0.00529736	0.0353568
AT1G18170	18.9484	22.5614	0.839861	0.00277145	0.0210117
AT1G18210	8.26594	11.1697	0.740031	5.1501e-08	1.37279e-06
AT1G18250	1.23928	2.11372	0.586302	7.18308e-05	0.000933634
AT1G18330	28.8773	37.459	0.770903	0.000101964	0.00127561
AT1G18540	2.9456	4.95855	0.594044	2.56565e-05	0.000373031
AT1G18590	11.0491	15.2035	0.726746	0.00021208	0.00238225
AT1G18620	4.85717	8.96669	0.541691	3.03639e-13	1.81459e-11
AT1G18650	2.42942	3.8992	0.623057	0.000106846	0.00132712
AT1G18720	12.2401	19.0878	0.641254	2.00998e-13	1.23189e-11
AT1G18810	27.0284	32.5941	0.829242	0.00522481	0.0349981
AT1G18850	8.9228	11.6265	0.767453	0.000535726	0.00535502
AT1G19150	7.21795	10.3783	0.695485	1.22994e-06	2.42421e-05
AT1G19350	2.958	4.95004	0.597571	9.39385e-05	0.00118788
AT1G19370	135.678	221.957	0.611279	2.24831e-35	6.1895e-33
AT1G19450	21.5278	36.5863	0.588412	2.00305e-24	3.03038e-22
AT1G19570	1.52531	2.48892	0.612841	0.00401097	0.0283009
AT1G19660	6.36519	9.31768	0.683131	1.18361e-09	4.15823e-08
AT1G19715	2.75326	4.23376	0.65031	7.84652e-05	0.00100662
AT1G19720	9.94737	12.6757	0.784758	0.00294197	0.0220457
AT1G19740	1.64901	3.08155	0.535125	0.00688478	0.0433506
AT1G19910	8.26732	11.9644	0.690992	0.00532785	0.0355183
AT1G19920	2.61759	4.41417	0.592996	8.70753e-07	1.79198e-05
AT1G20010	5.28392	7.49963	0.704558	0.00496465	0.0336718
AT1G20020	16.95	21.0066	0.806887	0.00591339	0.0386656
AT1G20225	10.9261	16.3792	0.667076	0.000307848	0.00330966
AT1G20260	118.829	145.051	0.819225	2.42435e-07	5.61547e-06
AT1G20440	5.09882	8.1087	0.628809	6.59635e-07	1.39688e-05
AT1G20470	48.9125	58.5291	0.835695	9.31041e-05	0.00117822
AT1G20560	20.9212	25.0168	0.836287	0.00434424	0.030096
AT1G20620	11.1327	19.0257	0.58514	9.29612e-14	5.86879e-12
AT1G20630	2.75381	5.50131	0.500573	5.09775e-10	1.91086e-08
AT1G20640	8.60599	11.7438	0.73281	0.00057813	0.00566426
AT1G20693	15.2435	20.5789	0.740733	3.21176e-06	5.79946e-05
AT1G20823	9.24321	13.1977	0.700367	2.50622e-06	4.65563e-05
AT1G20970	57.9849	74.2106	0.781356	2.65918e-07	6.1005e-06
AT1G21120	11.2336	14.4424	0.777823	0.00515846	0.0346365
AT1G21130	0.592184	2.65575	0.222982	1.09391e-08	3.32189e-07
AT1G21250	9.88897	17.9589	0.550643	7.64518e-10	2.76693e-08
AT1G21270	132.024	163.406	0.807953	2.41321e-09	8.10502e-08
AT1G21460	17.4857	23.8794	0.732251	6.38013e-08	1.67671e-06
AT1G21500	45.0001	52.1693	0.862578	0.0050664	0.0341714
AT1G21590	13.9561	18.401	0.758442	0.000181071	0.00208126
AT1G21630	12.185	15.3512	0.793749	0.00509135	0.0342544
AT1G21640	18.5916	22.6519	0.820755	0.00213736	0.0168511
AT1G21680	106.046	167.134	0.634494	1.65567e-35	4.79373e-33
AT1G21750	311.762	401.755	0.776001	1.30982e-19	1.38339e-17
AT1G21810	4.73447	6.40983	0.738627	0.00267807	0.0204326
AT1G21880	6.18019	10.7532	0.574728	3.07873e-11	1.37138e-09
AT1G22060	19.6475	23.4946	0.836254	0.00482492	0.0329504
AT1G22120	228.837	266.809	0.857681	4.36956e-05	0.00059754
AT1G22160	34.0875	46.1848	0.738067	5.41024e-10	2.00614e-08
AT1G22360	54.2894	73.6156	0.737472	4.93848e-09	1.59792e-07
AT1G22530	15.2145	21.5976	0.704456	6.31428e-09	2.00067e-07
AT1G22570	1.17774	1.98698	0.59273	0.00432006	0.029978
AT1G22630	21.168	25.5763	0.827642	0.000373598	0.00392514
AT1G22710	26.293	32.4726	0.809699	0.00129934	0.0111383
AT1G22730	10.1554	14.3929	0.705583	5.85286e-07	1.25366e-05
AT1G22740	12.9329	17.8512	0.724484	0.000402526	0.00418035
AT1G22770	7.01906	9.41402	0.745596	0.00186861	0.0151227
AT1G22780	33.4313	38.5483	0.867258	0.0038592	0.0273796
AT1G22910	15.2374	19.7847	0.770164	0.00112146	0.00986004
AT1G23020	2.98371	5.8661	0.508636	5.29793e-09	1.70111e-07
AT1G23130	2.38465	3.60121	0.662179	0.000435545	0.00448443
AT1G23180	1.1094	2.20987	0.502019	0.000351429	0.00371411
AT1G23205	65.7348	77.6675	0.846361	2.95912e-05	0.000425086
AT1G23340	19.1813	26.6873	0.718744	2.62978e-08	7.43467e-07
AT1G23390	10.2277	15.1433	0.675393	1.1223e-08	3.39582e-07
AT1G23490	77.6555	90.3734	0.859274	0.00368306	0.0264315
AT1G23740	80.2175	108.967	0.736166	7.42136e-11	3.13922e-09
AT1G23820	59.6107	73.0667	0.815839	0.000118326	0.00144618
AT1G23970	77.8147	114.942	0.676989	5.66327e-29	1.09314e-26
AT1G24020	47.2381	77.356	0.610658	5.88847e-27	1.00903e-24
AT1G24140	11.1721	14.4205	0.774733	0.00555834	0.036792
AT1G24170	24.8549	33.5264	0.741352	4.32284e-11	1.90035e-09
AT1G24180	73.3741	90.1675	0.813754	9.93203e-06	0.000160459
AT1G24190	14.0873	17.3976	0.809729	0.00122097	0.0105798
AT1G24460	32.2198	46.4655	0.693414	3.80132e-09	1.26407e-07
AT1G24510	6.75445	10.3336	0.65364	7.04333e-08	1.82247e-06
AT1G24530	4.65333	8.40306	0.553766	1.86059e-06	3.55056e-05
AT1G25260	0.38194	2.35882	0.16192	1.30594e-08	3.89531e-07
AT1G25275	26.3167	34.427	0.76442	2.09077e-06	3.94942e-05
AT1G25440	28.0622	35.4894	0.790718	1.11482e-05	0.000177958
AT1G25510	12.2839	17.1125	0.717831	0.00034996	0.00370314
AT1G25520	6.75559	8.69905	0.776589	0.00148244	0.0124444
AT1G25560	83.4453	96.7135	0.862809	0.00488786	0.0332762
AT1G26110	2.14623	6.29913	0.340719	4.72293e-11	2.07082e-09
AT1G26150	1.99952	5.92886	0.337252	1.00339e-12	5.50652e-11
AT1G26220	5.1444	7.25753	0.708836	0.000155526	0.00182639
AT1G26270	109.128	159.225	0.685368	3.11765e-38	9.87825e-36
AT1G26560	225.921	262.205	0.861618	0.00110215	0.00973611
AT1G26630	10.7917	13.8065	0.781642	0.00336269	0.0244988
AT1G26800	49.7403	60.21	0.826114	0.000389976	0.00407522
AT1G26920	9.23239	12.722	0.725704	0.000212013	0.00238225
AT1G27020	11.2551	15.4774	0.727197	0.00118544	0.0103039
AT1G27090	78.6278	107.887	0.728794	2.94653e-12	1.52249e-10
AT1G27350	54.704	70.6963	0.773789	1.84916e-11	8.60193e-10
AT1G27360	45.6654	55.0089	0.830145	4.47525e-05	0.000609513
AT1G27370	20.7128	25.2229	0.82119	0.00169868	0.0139696
AT1G27460	4.93143	6.85162	0.719746	0.000681742	0.00651964
AT1G27480	8.44437	11.6242	0.726445	4.52636e-05	0.000615635
AT1G27680	39.4113	45.9126	0.858398	0.00331007	0.0241889
AT1G27930	19.3806	23.4179	0.8276	0.00316199	0.0233442
AT1G28050	11.2526	13.8476	0.812604	0.00427461	0.0297241
AT1G28260	14.1975	17.5588	0.80857	0.006555	0.0418179
AT1G28280	5.76962	8.26551	0.698036	2.2311e-05	0.000328369
AT1G28290	180.512	314.787	0.573442	1.70134e-68	1.19044e-65
AT1G28400	6.72268	9.80845	0.685396	1.46603e-06	2.84284e-05
AT1G28420	20.3456	25.5227	0.797159	0.00577056	0.037982
AT1G28570	8.07875	10.1264	0.797788	0.00135443	0.0115515
AT1G28610	13.8497	19.0733	0.726131	1.54156e-05	0.000235554
AT1G28660	44.3383	55.2748	0.802142	2.74687e-05	0.000396425
AT1G28670	13.1934	16.2117	0.813825	0.0039024	0.0276744
AT1G29050	3.66595	5.61303	0.653115	3.69017e-06	6.55758e-05
AT1G29120	23.9642	30.0749	0.796816	0.000902592	0.00823315
AT1G29390	51.8431	59.807	0.86684	0.00268879	0.0204867
AT1G29400	11.8354	15.9247	0.743213	0.000891116	0.00815511
AT1G29660	14.7362	19.5448	0.753969	6.42379e-07	1.36378e-05
AT1G29910	16.4426	20.505	0.801883	0.000271096	0.00295235
AT1G29920	0.647667	1.78515	0.362808	1.72234e-05	0.000259635
AT1G29930	84.845	97.0913	0.873868	0.00197781	0.015846
AT1G29950	10.9792	13.7977	0.795726	0.000100191	0.00125747
AT1G30130	6.41963	8.70826	0.737189	0.00501964	0.0339624
AT1G30260	5.72448	8.24082	0.694649	0.00381032	0.027159
AT1G30330	25.3126	31.5761	0.801637	0.00049099	0.00497898
AT1G30380	28.8839	35.0612	0.823814	0.00261592	0.0200407
AT1G30400	4.61632	6.78632	0.680239	0.00655669	0.0418179
AT1G30410	25.5082	30.6944	0.831037	0.00253592	0.0195258
AT1G30420	97.3395	123.081	0.790855	3.80699e-07	8.44528e-06
AT1G30530	6.42343	8.08868	0.794125	0.00367178	0.0263731
AT1G30610	36.2915	43.4117	0.835983	0.00416641	0.0291406
AT1G30900	7.30552	9.10085	0.802729	0.00681666	0.043008
AT1G31180	29.3415	37.9215	0.773744	6.44846e-07	1.36729e-05
AT1G31190	7.37988	10.2401	0.720684	0.00372189	0.0266568
AT1G31280	62.8822	81.6664	0.769989	1.33066e-08	3.96201e-07
AT1G31330	55.451	67.6561	0.8196	0.000187028	0.00214094
AT1G31350	2.72472	4.55478	0.598211	0.00163768	0.0135409
AT1G31420	31.6386	45.3795	0.6972	3.84055e-16	2.99974e-14
AT1G31580	42.521	52.1154	0.815901	1.34553e-07	3.26313e-06
AT1G31660	723.969	932.096	0.776711	9.09317e-19	9.0356e-17
AT1G31690	28.0802	35.2258	0.797147	0.0007346	0.00693821
AT1G31710	4.79424	7.64193	0.62736	0.000702783	0.00668659
AT1G31800	0.630144	1.9722	0.319513	2.7478e-05	0.000396425
AT1G32060	56.6304	79.2461	0.714614	3.31573e-16	2.66416e-14
AT1G32100	5.79628	8.86064	0.654161	0.00637067	0.0410524
AT1G32130	1.91528	3.60426	0.531394	2.89303e-07	6.59195e-06
AT1G32200	9.10016	13.7568	0.661501	4.74573e-08	1.27308e-06
AT1G32220	23.9862	30.0309	0.798715	0.000348092	0.00369034
AT1G32240	32.0232	36.7055	0.872437	0.00583207	0.038257
AT1G32470	80.0109	105.696	0.756993	6.04065e-09	1.92122e-07
AT1G32520	4.18712	6.60157	0.634261	0.000306943	0.00330205
AT1G32530	6.44247	9.79604	0.65766	9.90546e-05	0.00124508
AT1G32540	2.73456	4.38188	0.624061	0.000437521	0.00450202
AT1G33040	40.206	57.0823	0.704351	2.40808e-13	1.45464e-11
AT1G33110	29.1724	46.4122	0.62855	8.21931e-15	5.70359e-13
AT1G33470	12.0906	15.0959	0.800918	0.00542598	0.0360201
AT1G33720	15.2327	19.6423	0.775504	0.00014688	0.00173255
AT1G33811	179.368	234.792	0.763943	7.65612e-25	1.19046e-22
AT1G33960	4.42626	7.00829	0.631575	0.00123586	0.0106813
AT1G33970	1.68806	2.77297	0.608757	0.000567255	0.00560018
AT1G34180	0.627443	1.09068	0.575277	0.00577509	0.037982
AT1G34760	7.81019	14.2248	0.549054	3.75621e-08	1.029e-06
AT1G35160	344.058	398.611	0.863144	1.24492e-05	0.000196669
AT1G35340	7.95773	10.7353	0.741269	0.000337353	0.00359465
AT1G35420	30.8571	39.7208	0.776851	3.26889e-05	0.000465602
AT1G35510	9.85348	12.785	0.770706	0.00809337	0.0493866
AT1G35580	530.067	602.484	0.879803	0.00189582	0.0153134
AT1G35620	130.058	153.132	0.849322	0.00057368	0.00563381
AT1G35670	93.968	124.574	0.754314	4.10986e-09	1.35416e-07
AT1G35710	6.47108	9.10153	0.710989	2.00312e-05	0.000297421
AT1G35720	8.00614	13.1316	0.609687	3.83783e-11	1.69157e-09
AT1G36320	2.77035	3.88642	0.712829	0.00578226	0.0380045
AT1G37130	2.30696	3.585	0.643503	0.00208007	0.0164767
AT1G41830	14.2681	25.5874	0.557624	3.4514e-19	3.51269e-17
AT1G42960	13.5869	19.6049	0.693035	3.48161e-06	6.21325e-05
AT1G42970	24.2941	29.2717	0.82995	0.00374243	0.0267522
AT1G43170	2.0664	3.51983	0.587074	0.00650466	0.0415808
AT1G43670	29.9273	36.474	0.82051	0.00181612	0.0147834
AT1G43800	17.2377	24.5461	0.702259	6.41521e-16	4.96455e-14
AT1G43910	14.3583	20.044	0.716338	6.04969e-05	0.000798055
AT1G44000	28.9866	36.0555	0.803943	0.00612013	0.0397584
AT1G44446	584.475	698.305	0.836991	0.00328813	0.0240704
AT1G45010	33.7846	42.0353	0.803718	3.0478e-05	0.000436331
AT1G45191	98.5062	145.68	0.676184	1.69276e-49	7.10664e-47
AT1G45201	11.6554	14.7132	0.792173	0.00527729	0.0352512
AT1G45688	681.941	795.478	0.857272	6.40061e-06	0.000108901
AT1G47400	20.1987	24.924	0.810413	8.23929e-05	0.00105299
AT1G47670	1.45419	2.68739	0.541116	0.00752453	0.0466513
AT1G47900	12.9207	15.3561	0.841405	0.00600324	0.0391352
AT1G48030	1.47469	4.1274	0.357292	2.55468e-11	1.14708e-09
AT1G48120	2.11014	3.5677	0.591456	0.00368048	0.0264242
AT1G48300	375.306	413.772	0.907036	0.0059793	0.0390095
AT1G48350	3.42484	4.86871	0.703438	0.000770461	0.00723621
AT1G48520	8.3169	11.334	0.733803	0.00441657	0.0305216
AT1G48630	31.8642	43.9965	0.724244	8.22812e-08	2.09039e-06
AT1G48830	23.8729	38.7611	0.615897	1.08051e-17	9.80815e-16
AT1G48840	7.73042	9.96448	0.775797	0.00567789	0.0374946
AT1G48920	64.922	83.1429	0.780848	1.57402e-08	4.64544e-07
AT1G49010	333.945	377.326	0.885032	0.000133805	0.0016096
AT1G49130	11.224	14.0538	0.798644	0.00646864	0.0414294
AT1G49320	3.1805	6.22248	0.51113	3.18824e-09	1.06442e-07
AT1G49450	105.252	124.212	0.847362	6.05572e-05	0.000798224
AT1G49500	12.934	15.8985	0.813536	0.00495295	0.033606
AT1G49560	4.69492	6.5098	0.721207	0.00013928	0.00166085
AT1G49720	24.3769	31.0285	0.785628	0.000135362	0.00162367
AT1G49740	58.6171	68.7297	0.852865	0.00190836	0.0153817
AT1G49750	1.65713	2.86943	0.577513	0.00307406	0.0228318
AT1G49760	37.0868	44.4772	0.833838	0.00538346	0.0358179
AT1G50020	3.0691	5.03826	0.609159	5.32808e-07	1.14711e-05
AT1G50040	6.56131	9.43716	0.695264	4.28658e-06	7.55346e-05
AT1G50110	5.5069	7.31936	0.752375	0.00114215	0.0100001
AT1G50290	3.76277	5.39086	0.69799	0.00358359	0.0258724
AT1G50460	13.7325	16.8936	0.812882	0.00148873	0.0124767
AT1G50640	7.3865	11.5296	0.640655	3.78371e-08	1.03485e-06
AT1G50920	18.8491	23.987	0.785804	0.00671206	0.0425503
AT1G51080	16.6664	21.0254	0.792678	1.23901e-06	2.43639e-05
AT1G51110	10.2791	15.8389	0.648976	6.44781e-06	0.000109593
AT1G51140	37.6886	54.2203	0.6951	4.66494e-12	2.38836e-10
AT1G51200	28.6	37.635	0.759932	0.000226453	0.00252177
AT1G51510	27.1413	34.8052	0.779805	1.6516e-05	0.000250136
AT1G51610	24.9029	31.5887	0.788348	0.000398615	0.00414742
AT1G51680	8.44176	10.6754	0.790769	4.17811e-05	0.000575578
AT1G51700	7.23643	9.20401	0.786226	0.00337995	0.0246021
AT1G51940	5.99214	10.3937	0.576516	1.6102e-11	7.51114e-10
AT1G52030	457.613	570.218	0.802523	9.10963e-13	5.01567e-11
AT1G52040	19.7871	24.1092	0.820728	0.0026337	0.0201493
AT1G52150	91.7498	106.961	0.857785	0.00564985	0.0373388
AT1G52190	26.8027	32.1437	0.833841	0.00714158	0.0446994
AT1G52230	52.8083	68.3427	0.772699	7.85307e-05	0.00100669
AT1G52342	29.6578	45.045	0.658403	3.25603e-18	3.07183e-16
AT1G52360	22.6178	27.9949	0.807925	0.000140564	0.00167174
AT1G52400	30.1733	42.7969	0.705034	1.58262e-10	6.35812e-09
AT1G52410	21.9054	26.1985	0.836134	0.00463023	0.0317894
AT1G52510	20.7119	31.1779	0.664311	7.12365e-09	2.25287e-07
AT1G52780	13.9199	17.4014	0.799926	0.00215639	0.0169631
AT1G52870	9.33433	13.7868	0.677049	5.06465e-07	1.09601e-05
AT1G52930	1.17545	2.87375	0.409031	1.06606e-09	3.77687e-08
AT1G53070	3.36504	4.93716	0.681573	0.00260697	0.0199868
AT1G53180	428.571	581.42	0.737112	6.09667e-30	1.24855e-27
AT1G53210	153.234	173.47	0.883349	0.0071022	0.0444861
AT1G53300	13.9912	17.9193	0.780789	0.00146348	0.0123189
AT1G53440	30.0676	38.8717	0.773508	7.89641e-05	0.00101148
AT1G53510	23.5107	28.0745	0.83744	0.00723595	0.0452059
AT1G53590	3.67952	6.43484	0.571812	1.26704e-06	2.48277e-05
AT1G53670	1.92792	2.85278	0.675805	0.0065341	0.0417078
AT1G54000	25.5572	33.8625	0.754735	1.40751e-10	5.75092e-09
AT1G54020	4.93331	8.16598	0.60413	9.97892e-05	0.00125337
AT1G54040	10.4911	13.3343	0.786777	0.00747414	0.0464176
AT1G54080	10.5965	14.2675	0.742703	0.000565679	0.00558791
AT1G54200	6.35866	7.8116	0.814002	0.00483578	0.0329977
AT1G54410	1.84281	3.12208	0.590249	0.000133513	0.00160723
AT1G54780	4.59598	12.7468	0.36056	3.84445e-38	1.19555e-35
AT1G54960	161.561	199.061	0.811618	1.02751e-06	2.0789e-05
AT1G55360	12.2132	15.5594	0.784942	0.00141721	0.0119714
AT1G55450	20.1403	25.4605	0.791041	0.000669592	0.00642383
AT1G55460	2367.19	2675.12	0.884889	0.00027246	0.00296527
AT1G55490	54.7688	65.7836	0.83256	0.000941801	0.00855363
AT1G55850	6.77112	11.5006	0.588762	5.85769e-15	4.20727e-13
AT1G56050	10.223	14.1547	0.722235	2.34269e-06	4.38582e-05
AT1G56070	6.02645	7.48671	0.804953	0.00621115	0.0402407
AT1G56110	61.2477	72.595	0.84369	0.00280399	0.0212297
AT1G56120	8.52906	10.6651	0.799714	0.00257589	0.0197881
AT1G56190	121.366	142.234	0.853287	0.00585687	0.0383703
AT1G56220	5.67503	8.412	0.674635	1.26484e-06	2.48135e-05
AT1G56280	4.50557	6.55472	0.687378	0.000233712	0.00259572
AT1G56300	1.78171	3.02726	0.588555	0.000583259	0.00570232
AT1G56340	1.71224	2.89546	0.591355	0.00550935	0.0365109
AT1G56510	6.95506	8.67868	0.801396	0.000380892	0.00399022
AT1G56660	23.3627	30.9415	0.755059	0.00012021	0.00146494
AT1G56690	13.1727	17.9451	0.734059	0.000175326	0.00202493
AT1G57660	59.0239	70.5844	0.836218	0.000424513	0.00438968
AT1G57750	25.2272	32.3658	0.779441	0.000199765	0.00226666
AT1G57770	5.55794	7.91031	0.70262	0.000431363	0.00444683
AT1G57820	7.92115	12.1905	0.64978	1.28345e-09	4.49019e-08
AT1G57990	41.857	51.3077	0.815804	0.000314659	0.00337856
AT1G58030	2.44953	5.31133	0.46119	6.68735e-13	3.73092e-11
AT1G58225	82.9294	99.5588	0.832969	2.26396e-05	0.000332622
AT1G58250	4.80802	8.05867	0.596626	0.000116658	0.00142786
AT1G58290	6.76067	9.93916	0.680205	0.00224099	0.0175609
AT1G58380	0.488605	1.26206	0.38715	0.00108413	0.00960224
AT1G58520	5.58801	8.03359	0.69558	0.000768984	0.00723043
AT1G58602	16.3079	25.4261	0.641385	1.08394e-09	3.83211e-08
AT1G59590	151.793	193.991	0.782473	8.09858e-05	0.00103658
AT1G59660	185.014	238.532	0.775633	1.58485e-06	3.04861e-05
AT1G59760	20.9046	24.5009	0.853218	0.00423563	0.0295018
AT1G59870	54.5058	69.0769	0.78906	1.30167e-07	3.16798e-06
AT1G59900	8.23907	12.0176	0.685584	1.55484e-09	5.36148e-08
AT1G60010	222.44	276.978	0.803098	6.89819e-12	3.43743e-10
AT1G60060	50.0121	58.5681	0.853913	0.00105661	0.00939809
AT1G60140	7.15476	11.1556	0.641363	2.87609e-05	0.000414221
AT1G60160	54.1229	77.6984	0.696576	6.54003e-15	4.63404e-13
AT1G60260	3.7134	4.81618	0.771027	0.00762373	0.0471201
AT1G60270	13.5013	18.0056	0.749836	2.12534e-06	4.00571e-05
AT1G60390	29.6539	36.1152	0.821092	0.000983625	0.00886635
AT1G60590	156.08	220.29	0.708523	1.0382e-25	1.64476e-23
AT1G60640	21.1219	26.0433	0.811029	0.000198985	0.00226086
AT1G60770	5.60583	9.2943	0.603148	6.98473e-08	1.8101e-06
AT1G60870	91.8961	118.599	0.77485	1.58016e-11	7.43296e-10
AT1G60950	269.07	324.911	0.828136	2.33347e-09	7.85291e-08
AT1G61190	5.07001	7.19522	0.704635	4.95791e-06	8.60995e-05
AT1G61240	6.82144	8.89641	0.766763	0.00244764	0.0189739
AT1G61250	3.34178	5.36859	0.622469	1.30064e-05	0.00020451
AT1G61520	7.36906	10.4841	0.702881	1.48907e-05	0.00022974
AT1G61570	27.506	32.7113	0.840872	0.000646345	0.00622723
AT1G61690	8.26336	10.4067	0.794043	0.000660821	0.00635941
AT1G61890	33.8648	43.105	0.785635	3.91529e-09	1.29683e-07
AT1G61990	118.283	139.202	0.849718	5.678e-05	0.000754492
AT1G62250	4.94921	6.96044	0.711048	0.002154	0.0169583
AT1G62310	13.0424	19.4393	0.670929	2.0744e-16	1.71603e-14
AT1G62360	9.21404	11.6583	0.790345	0.00155934	0.0129773
AT1G62390	14.0185	17.5533	0.798629	0.00158327	0.0131428
AT1G62480	106.711	129.502	0.824007	1.04196e-07	2.59225e-06
AT1G62500	4.17381	6.0982	0.684434	0.00678807	0.0428864
AT1G62540	60.3671	78.775	0.766322	9.35928e-08	2.35285e-06
AT1G62630	13.0408	16.3348	0.798345	0.00639465	0.0411123
AT1G62660	989.547	1326.82	0.745804	2.11545e-32	4.80065e-30
AT1G62750	12.4909	16.0321	0.779121	0.00394103	0.027866
AT1G62790	14.3974	18.0917	0.795801	0.000116261	0.00142531
AT1G62810	15.8161	20.7861	0.760898	1.16465e-05	0.000185032
AT1G62870	45.4894	66.9891	0.679056	7.03541e-20	7.67179e-18
AT1G62960	105.611	121.784	0.867201	0.00422753	0.0294747
AT1G63295	2.76533	4.35149	0.63549	7.70336e-05	0.000991284
AT1G63300	6.36205	8.97113	0.70917	0.000161714	0.00189113
AT1G63360	1.47846	2.54556	0.580799	0.00244842	0.0189739
AT1G63390	15.2776	21.311	0.716887	1.82073e-10	7.24539e-09
AT1G63540	5.45793	7.13296	0.76517	0.00321868	0.0236652
AT1G63670	24.22	28.9665	0.836136	0.00242345	0.0188064
AT1G63680	41.1134	47.7671	0.860707	0.00638071	0.0410723
AT1G63690	7.22921	9.86724	0.732647	0.00241703	0.0187687
AT1G63940	2.00785	2.949	0.680858	0.0031218	0.023125
AT1G64200	11.3529	15.2001	0.746893	0.00798165	0.0488113
AT1G64355	37.7805	49.0034	0.770978	5.12711e-09	1.65258e-07
AT1G64360	3.74713	6.01787	0.622667	7.03607e-06	0.000118157
AT1G64370	18.4968	24.0966	0.767611	0.000251423	0.00277955
AT1G64380	16.03	19.8873	0.806045	0.00206157	0.016361
AT1G64390	0.917396	1.49082	0.615362	0.00343886	0.0249778
AT1G64430	9.79565	12.4448	0.787128	0.00235526	0.018362
AT1G64500	41.382	48.0378	0.861446	0.00412712	0.0289502
AT1G64780	23.9283	31.4443	0.760977	4.11256e-09	1.35416e-07
AT1G64900	37.1047	44.0542	0.842251	0.000373745	0.00392514
AT1G64970	18.8302	27.029	0.696668	6.33492e-06	0.000107893
AT1G64980	21.7484	26.2723	0.827806	5.90362e-05	0.000781241
AT1G65010	27.3729	33.8733	0.808095	1.06231e-05	0.000170548
AT1G65060	41.9804	51.5735	0.813991	6.48545e-06	0.00011001
AT1G65230	8.3682	10.733	0.779668	0.0043911	0.0303956
AT1G65295	7.21274	9.51654	0.757916	0.000611475	0.00593555
AT1G65480	16.6184	20.1745	0.823734	0.00102102	0.00915919
AT1G65490	12.3736	15.5677	0.794821	0.00682969	0.0430683
AT1G65540	58.8473	77.893	0.755489	6.32102e-07	1.34366e-05
AT1G65790	6.783	8.46184	0.801598	0.00739942	0.0460558
AT1G65800	10.9167	13.5904	0.803265	0.00746978	0.0464077
AT1G65860	0.725496	1.19401	0.607613	0.0047927	0.0327703
AT1G65960	10.4143	13.7036	0.75997	0.000344228	0.00366094
AT1G66150	117.287	136.012	0.862329	0.000287654	0.00311449
AT1G66200	11.6762	15.4803	0.754262	0.00233931	0.0182462
AT1G66350	1.1661	3.03099	0.384726	2.34979e-07	5.47296e-06
AT1G66410	4.15872	10.9626	0.379355	1.53457e-09	5.30248e-08
AT1G66430	4.01091	6.7868	0.590987	3.76254e-07	8.35772e-06
AT1G66580	5.6998	7.29876	0.780928	0.00626045	0.0404664
AT1G66880	9.17356	11.834	0.775188	0.000298179	0.00321807
AT1G67090	5.48634	7.95421	0.689741	0.000521018	0.0052392
AT1G67120	32.8599	42.8492	0.766874	7.54434e-06	0.000125733
AT1G67230	142.41	182.279	0.781274	2.73701e-16	2.22042e-14
AT1G67360	22.1526	30.4255	0.728092	1.05948e-06	2.12567e-05
AT1G67700	44.3929	54.87	0.809057	5.8881e-08	1.56207e-06
AT1G67740	121.805	143.008	0.85173	4.87381e-05	0.000658454
AT1G67750	16.5372	33.8125	0.489086	2.12679e-35	5.95252e-33
AT1G67830	12.0124	15.3788	0.781104	0.000620532	0.00599574
AT1G67840	29.2576	35.8791	0.81545	0.000645714	0.00622472
AT1G67865	147.92	173.293	0.853579	6.35405e-05	0.000833622
AT1G67900	6.61465	9.81132	0.674186	0.00490577	0.0333607
AT1G67970	12.7278	16.5076	0.771023	0.000217665	0.00243846
AT1G68010	44.5903	53.5607	0.832519	0.00659461	0.0419482
AT1G68020	3.7423	5.68263	0.65855	0.00191728	0.0154354
AT1G68050	91.7175	120.339	0.762157	2.16621e-15	1.61677e-13
AT1G68060	45.6405	60.645	0.752585	6.67459e-10	2.4473e-08
AT1G68130	372.833	455.236	0.818989	5.76056e-06	9.92176e-05
AT1G68440	2.59	5.84424	0.443171	4.01216e-05	0.00055545
AT1G68520	579.458	738.162	0.785002	1.36927e-11	6.49554e-10
AT1G68570	12.0655	16.102	0.749316	4.61442e-06	8.07187e-05
AT1G68580	648.559	926.14	0.700282	3.05261e-43	1.04617e-40
AT1G68590	25.5681	30.2428	0.845427	0.00501527	0.0339466
AT1G68600	0.561759	1.57694	0.356234	0.00010479	0.00130544
AT1G68650	373.546	414.922	0.900279	0.00315447	0.0233156
AT1G68660	127.954	159.992	0.79975	1.16819e-05	0.00018542
AT1G68790	21.5958	28.6335	0.754215	3.73859e-08	1.02585e-06
AT1G68840	463.386	563.054	0.822986	6.80988e-10	2.48605e-08
AT1G69070	8.09864	11.0031	0.736032	0.00766557	0.0472917
AT1G69160	57.8681	82.8419	0.698537	1.29497e-10	5.317e-09
AT1G69295	38.3049	44.0036	0.870496	0.00779857	0.0479361
AT1G69310	40.5872	53.3968	0.760105	5.19074e-11	2.25824e-09
AT1G69420	7.92965	12.0413	0.658539	2.38826e-07	5.54717e-06
AT1G69510	12.55	15.5465	0.807259	0.00177511	0.0144988
AT1G69530	4.42583	7.13971	0.619889	6.02836e-06	0.0001033
AT1G69670	21.0218	26.2539	0.800711	0.000119344	0.0014565
AT1G69690	4.3182	5.76801	0.748647	0.00657964	0.0419006
AT1G69700	16.2454	22.8248	0.711744	1.57815e-14	1.06862e-12
AT1G69780	10.6651	14.3738	0.741983	0.000462458	0.00471814
AT1G69830	15.4444	21.532	0.717278	0.00314215	0.0232552
AT1G69840	14.8984	17.9028	0.832184	0.00789667	0.048415
AT1G69870	5.53097	7.33505	0.754046	0.00599062	0.0390682
AT1G69890	28.9164	37.2935	0.775373	9.58633e-07	1.95605e-05
AT1G69935	39.3382	48.5056	0.811003	0.000923685	0.0084071
AT1G70000	2.10149	2.92845	0.71761	0.00130057	0.0111431
AT1G70060	10.861	15.4127	0.704676	1.53584e-07	3.68448e-06
AT1G70070	128.584	148.768	0.864331	0.00110668	0.00976077
AT1G70200	43.5191	66.0643	0.658738	9.38343e-25	1.44565e-22
AT1G70250	43.4627	52.2992	0.83104	0.0008232	0.00761653
AT1G70260	17.6449	22.1146	0.797884	0.000952747	0.00862971
AT1G70290	6.3316	8.87353	0.713537	7.4482e-05	0.000963617
AT1G70310	17.0257	21.6651	0.785857	0.00017329	0.00200279
AT1G70370	15.8133	26.2292	0.602887	1.01801e-22	1.40127e-20
AT1G70420	15.796	20.2967	0.778254	0.000178123	0.00205441
AT1G70490	32.0286	38.5977	0.829807	0.00433483	0.0300551
AT1G70520	44.3598	51.8604	0.85537	0.00749716	0.0465262
AT1G70530	6.21698	8.09629	0.76788	0.00574391	0.0378562
AT1G70700	6.39627	8.12178	0.787545	0.00106021	0.00942518
AT1G70710	33.8705	41.7374	0.811513	2.34834e-08	6.684e-07
AT1G70730	1.43395	2.32067	0.617904	0.00154376	0.0128721
AT1G70760	8.78211	14.5673	0.602865	6.98958e-12	3.46874e-10
AT1G70770	37.1986	44.1967	0.84166	0.0020007	0.0159989
AT1G70780	7.37794	10.9302	0.675005	1.91143e-05	0.000284563
AT1G70810	118.739	141.288	0.840404	8.87435e-06	0.000145962
AT1G70820	23.2897	33.9237	0.686534	1.49953e-06	2.90445e-05
AT1G70830	22.86	28.6492	0.797927	1.83026e-05	0.000274179
AT1G70890	12.8647	22.7514	0.565448	6.47896e-26	1.0362e-23
AT1G70900	58.3183	75.8392	0.768974	1.33993e-11	6.37436e-10
AT1G70940	15.824	20.1435	0.785565	2.40483e-05	0.00035178
AT1G71000	6.11242	8.17186	0.747984	0.00421352	0.0294291
AT1G71030	13.4125	16.3423	0.820722	0.000570794	0.00561202
AT1G71695	4.1747	5.82905	0.716188	0.00372029	0.0266568
AT1G71697	9.44295	12.5673	0.751393	0.00219261	0.0172058
AT1G71810	148.507	172.847	0.85918	0.000169616	0.00196574
AT1G71820	78.2141	94.2634	0.82974	0.000102941	0.00128622
AT1G71880	57.9937	75.6082	0.76703	1.04804e-12	5.7142e-11
AT1G72030	7.27776	10.2096	0.712833	2.24983e-05	0.000330835
AT1G72130	10.63	13.4789	0.788639	0.00458275	0.0315273
AT1G72150	14.3156	17.2636	0.829237	0.00170716	0.0140325
AT1G72180	458.868	569.411	0.805864	2.51309e-12	1.31063e-10
AT1G72230	15.7433	18.6418	0.844516	0.00722931	0.045198
AT1G72260	2.01607	2.87838	0.700417	0.00617667	0.0400636
AT1G72370	8.64621	11.7863	0.733581	0.00202445	0.0161735
AT1G72430	10.0886	14.8851	0.677764	4.57641e-08	1.23449e-06
AT1G72440	7.98413	11.4448	0.697624	2.18112e-07	5.1299e-06
AT1G72510	2.05237	3.09203	0.663762	0.00370407	0.0265709
AT1G72645	12.1103	14.8136	0.817509	0.0064438	0.0413018
AT1G72680	2.87294	5.12274	0.560822	0.000281463	0.00305336
AT1G72700	6.36714	8.37751	0.760027	0.00252669	0.0194833
AT1G72810	29.8561	36.3236	0.821948	0.000738918	0.00697115
AT1G72820	79.3774	98.3315	0.807244	3.85785e-06	6.82665e-05
AT1G72900	36.8093	47.7492	0.770888	7.35859e-06	0.00012308
AT1G72910	6.46387	7.9962	0.808368	0.00770464	0.0474804
AT1G73060	75.9135	90.8338	0.835741	0.0045376	0.0312808
AT1G73325	18.3994	23.9234	0.769098	0.0028672	0.0216302
AT1G73330	21.7505	28.5611	0.761545	0.00050547	0.00510731
AT1G73370	175.736	220.48	0.797059	3.66422e-08	1.00709e-06
AT1G73480	16.817	21.8042	0.771271	0.00298044	0.0222645
AT1G73590	30.7159	37.9683	0.808989	0.00270298	0.0205669
AT1G73600	23.1077	29.2575	0.789804	0.0028167	0.0213163
AT1G73655	218.921	317.831	0.688796	1.27435e-42	4.28003e-40
AT1G73805	24.5188	37.9819	0.645538	2.54537e-08	7.20816e-07
AT1G73810	16.082	19.8087	0.811863	0.00383237	0.0272583
AT1G73840	9.34135	12.1237	0.770504	0.00685596	0.0432178
AT1G73920	4.76211	8.39573	0.567207	3.32557e-08	9.24606e-07
AT1G74070	17.9093	25.6311	0.698733	7.33318e-10	2.65974e-08
AT1G74210	2.95309	5.4395	0.542898	0.000674205	0.00645492
AT1G74250	310.439	364.247	0.852275	3.64448e-05	0.000509589
AT1G74260	2.01781	2.86534	0.704215	0.00523586	0.0350302
AT1G74340	27.6947	36.4237	0.760349	0.000374818	0.00393149
AT1G74470	3.83435	5.96957	0.642316	0.000834127	0.00770837
AT1G74640	11.0215	13.9259	0.791436	0.00114143	0.00999896
AT1G74670	2.49646	3.96322	0.629908	0.000684231	0.00653972
AT1G74710	11.1703	13.9364	0.801522	0.00311737	0.0231126
AT1G74880	8.91958	11.8284	0.754083	0.00184501	0.0149823
AT1G74910	24.5427	31.6734	0.774867	3.47589e-10	1.34185e-08
AT1G74960	63.1251	72.9301	0.865556	0.00790871	0.0484373
AT1G75040	1.35783	2.45741	0.552546	0.00357966	0.0258552
AT1G75140	3.80311	5.63371	0.675064	0.00347032	0.0251955
AT1G75180	8.00546	11.1707	0.716646	8.36011e-05	0.00106599
AT1G75190	9.62426	14.8075	0.649959	2.66836e-08	7.50582e-07
AT1G75220	10.7667	13.4863	0.798346	0.00331969	0.024238
AT1G75310	7.39943	10.0363	0.737268	1.24023e-05	0.000196298
AT1G75350	3.99397	7.60512	0.525169	9.85153e-14	6.17301e-12
AT1G75370	38.3711	46.3585	0.827703	2.7898e-06	5.11454e-05
AT1G75500	17.4108	23.4344	0.742958	6.07237e-06	0.000103843
AT1G75690	74.6609	94.4915	0.790133	1.03336e-06	2.08573e-05
AT1G75750	5.85585	10.2292	0.572467	3.30716e-06	5.92505e-05
AT1G75800	7.88034	11.5723	0.680965	7.26727e-06	0.000121674
AT1G75820	20.9998	27.1323	0.773978	0.000778244	0.00728893
AT1G75880	54.4487	62.4572	0.871776	0.00262387	0.0200924
AT1G75900	1.75548	3.09279	0.567606	0.00148738	0.0124763
AT1G76030	7.22048	12.5929	0.573375	7.63363e-18	7.08241e-16
AT1G76090	24.6204	29.0864	0.846458	0.00356573	0.0257767
AT1G76100	171.986	208.457	0.825045	3.02337e-06	5.5007e-05
AT1G76110	4.25081	6.21248	0.684238	0.000346563	0.00367878
AT1G76130	17.3977	24.4617	0.711222	4.37373e-09	1.43174e-07
AT1G76140	182.692	254.253	0.718545	1.89972e-31	4.14311e-29
AT1G76180	17.3073	22.123	0.782321	3.8029e-05	0.000528223
AT1G76490	2.48802	4.33658	0.573727	0.00241748	0.0187687
AT1G76580	9.00314	13.6194	0.661053	9.05068e-11	3.7997e-09
AT1G76620	4.45764	7.84974	0.56787	1.59872e-07	3.82439e-06
AT1G76670	22.9597	27.9723	0.820803	0.000114848	0.00141293
AT1G76790	4.02122	5.50366	0.730646	0.00322153	0.0236758
AT1G76810	7.34665	10.9402	0.671527	0.000152623	0.00179528
AT1G76880	11.3917	14.727	0.773522	0.000257542	0.00283229
AT1G77210	3.00497	4.46938	0.672347	0.00215663	0.0169631
AT1G77260	501.309	604.196	0.829712	1.56968e-10	6.32126e-09
AT1G77300	12.3054	14.9709	0.82195	0.00218245	0.0171559
AT1G77510	17.3202	21.5719	0.802906	0.00046642	0.00475279
AT1G77580	14.9491	22.0291	0.678607	3.63443e-07	8.10531e-06
AT1G77670	78.4569	100.156	0.783349	5.75029e-06	9.91423e-05
AT1G77990	22.9781	27.394	0.8388	0.000455693	0.00466044
AT1G78020	13.8557	17.0523	0.812544	0.00559558	0.0370093
AT1G78140	13.0669	18.4972	0.706425	1.09893e-05	0.000175756
AT1G78230	12.8141	16.1623	0.79284	0.00263759	0.0201607
AT1G78370	2.73619	4.58855	0.596307	0.000134976	0.00162135
AT1G78380	5.58504	7.00468	0.797329	0.0051716	0.0347055
AT1G78450	16.3576	20.1318	0.812525	0.000917998	0.00836459
AT1G78490	9.89318	12.6016	0.785074	0.00372282	0.0266568
AT1G78600	1.38688	2.49166	0.55661	0.00596579	0.0389365
AT1G78630	5.91163	8.11269	0.72869	0.00306477	0.0227829
AT1G78670	972.655	1117.86	0.870102	2.5527e-05	0.000371792
AT1G78680	20.1945	27.7511	0.727701	3.60575e-06	6.42795e-05
AT1G78830	5.55366	7.2903	0.761787	0.00382211	0.0271969
AT1G78850	3.40734	5.4128	0.629496	6.05598e-06	0.000103668
AT1G78880	4.6618	6.3025	0.739675	0.00077927	0.00729041
AT1G78970	137.518	157.159	0.875025	0.000920029	0.00837855
AT1G79150	4.02284	6.92387	0.581011	0.0001965	0.00223565
AT1G79340	2.42552	4.26807	0.568293	2.09743e-06	3.95754e-05
AT1G79440	231.005	272.132	0.848871	1.42955e-05	0.000222076
AT1G79510	25.3509	30.887	0.820763	0.0031188	0.023113
AT1G79550	8.91561	12.3718	0.720639	5.12523e-05	0.000689095
AT1G79750	5.97686	7.91266	0.755355	0.00429895	0.0298686
AT1G79790	3.19751	4.4386	0.720387	0.00278032	0.0210695
AT1G79920	38.6043	45.5218	0.848041	0.00030322	0.00326617
AT1G79970	5.28488	8.35619	0.632451	4.29575e-06	7.5617e-05
AT1G79990	8.46605	12.574	0.673296	2.45384e-08	6.9607e-07
AT1G80080	48.922	56.319	0.868658	0.0073231	0.0456484
AT1G80280	93.6657	109.169	0.857989	8.34275e-05	0.0010654
AT1G80300	25.2819	31.9573	0.791113	4.83272e-05	0.000653955
AT1G80340	17.6857	21.8567	0.809164	0.000519595	0.00522802
AT1G80380	2.32402	3.47395	0.668985	0.00244008	0.0189267
AT1G80440	1.4385	2.81605	0.510822	9.20685e-05	0.00116687
AT1G80460	3.97715	5.29122	0.751651	0.00213996	0.0168636
AT1G80490	46.6044	68.5985	0.67938	3.77833e-24	5.46978e-22
AT1G80830	14.2926	24.0138	0.595183	7.28578e-17	6.11751e-15
AT1G80850	15.4733	20.3202	0.761476	0.00035276	0.00372338
AT1G80920	19.1573	22.7139	0.843416	0.00700258	0.0439934
AT1G80930	7.42329	9.77006	0.759799	0.000736907	0.00695609
AT2G01150	8.03274	13.8932	0.578179	1.09015e-15	8.28363e-14
AT2G01170	1.80238	2.9571	0.609509	0.000252483	0.0027876
AT2G01250	76.0372	93.2371	0.815526	0.000213094	0.00239204
AT2G01290	17.1119	21.1778	0.808011	0.00174807	0.0143127
AT2G01590	13.8296	16.9843	0.814256	0.00285165	0.021542
AT2G01610	13.8202	17.1339	0.806598	0.000745296	0.00702737
AT2G01720	226.537	271.379	0.834763	6.25448e-08	1.64885e-06
AT2G01750	7.65681	10.3415	0.740399	0.000517698	0.00521205
AT2G01830	172.159	203.563	0.845725	5.18529e-05	0.000696056
AT2G01860	5.30097	7.95388	0.666464	0.00137539	0.0117006
AT2G02130	1.91931	4.23767	0.452917	5.06257e-10	1.90192e-08
AT2G02160	40.0074	53.2538	0.751258	1.99281e-05	0.000296152
AT2G02570	10.8242	14.1138	0.766922	0.005353	0.0356577
AT2G02710	25.771	30.9658	0.832239	0.00651281	0.041617
AT2G02810	21.1703	27.4451	0.771369	0.000688197	0.00657015
AT2G02950	12.9526	18.6404	0.694871	0.000395024	0.00411772
AT2G03340	6.73606	9.73418	0.692	0.00303672	0.0226145
AT2G03390	24.3888	33.8539	0.720413	9.87177e-19	9.75157e-17
AT2G03440	4.10878	7.64855	0.537197	0.00102594	0.0091788
AT2G03480	107.532	138.661	0.775504	1.75337e-08	5.12075e-07
AT2G03510	12.83	23.6186	0.543215	1.54821e-08	4.57731e-07
AT2G03550	10.6538	13.6154	0.782482	0.000218138	0.00244213
AT2G03760	14.6263	18.7193	0.781351	0.000540978	0.00539789
AT2G03820	3.26936	5.51457	0.592857	2.56902e-06	4.76177e-05
AT2G03890	62.2779	79.9161	0.779291	1.54251e-10	6.25364e-09
AT2G04160	41.5241	53.0771	0.782335	1.95917e-06	3.72175e-05
AT2G04450	34.6778	50.2526	0.690069	2.34184e-11	1.06002e-09
AT2G04495	8.98126	13.9589	0.643405	3.29697e-06	5.9215e-05
AT2G04520	14.7677	18.0045	0.82022	0.0016837	0.0138532
AT2G04780	19.824	24.9451	0.794705	5.63602e-06	9.7272e-05
AT2G04790	53.712	72.8734	0.737059	4.67458e-07	1.01553e-05
AT2G04865	0.342692	1.03458	0.331237	0.000409209	0.00424473
AT2G05070	0.664235	1.75798	0.377841	0.000548597	0.0054577
AT2G05100	0.111463	1.02294	0.108963	1.30205e-12	7.0081e-11
AT2G05310	1.77026	7.44057	0.237919	3.05164e-44	1.11405e-41
AT2G05380	12.5102	24.3727	0.513285	1.42235e-28	2.68377e-26
AT2G05440	9.97517	15.9415	0.625736	2.90314e-20	3.29409e-18
AT2G05520	9.13425	11.9091	0.767	0.000817176	0.00757104
AT2G05620	113.348	143.001	0.792634	3.43202e-11	1.52069e-09
AT2G05632	3.92531	5.6741	0.691795	0.00440119	0.0304404
AT2G05790	1.71235	2.99362	0.571998	0.000262987	0.00287897
AT2G05920	20.5743	27.2899	0.753916	5.18471e-06	8.98523e-05
AT2G06925	45.689	55.7517	0.819509	0.00155131	0.0129286
AT2G07050	6.50783	13.6718	0.476003	6.09742e-15	4.35719e-13
AT2G07738	11.0293	12.8856	0.85594	0.00492369	0.0334345
AT2G10940	53.0845	71.5823	0.741588	2.94876e-14	1.91191e-12
AT2G11225	3.889	6.42576	0.605219	0.00205577	0.0163227
AT2G11890	0.967726	3.22977	0.299627	4.1676e-13	2.40504e-11
AT2G12462	8.53108	13.8908	0.614154	4.72608e-10	1.78349e-08
AT2G12905	3.09425	3.76664	0.821487	0.00415092	0.0290514
AT2G14247	9.52359	13.2776	0.717268	0.00172135	0.0141145
AT2G14890	37.5886	56.553	0.664662	7.02824e-17	5.93092e-15
AT2G14900	2.388	3.83158	0.623241	0.000635778	0.00613599
AT2G15020	8.77554	11.4015	0.76968	0.00210322	0.0166256
AT2G15090	16.7108	21.4533	0.778939	9.50529e-06	0.000154805
AT2G15320	11.3017	17.093	0.66119	7.92978e-10	2.85761e-08
AT2G15390	32.7506	41.7839	0.78381	8.18527e-08	2.08595e-06
AT2G15580	48.7675	56.5387	0.862551	0.00731171	0.0455943
AT2G15890	19.782	23.3935	0.845618	0.00542011	0.0360047
AT2G15970	3.5706	6.59391	0.5415	9.80027e-05	0.0012337
AT2G16270	11.4226	15.813	0.722355	1.01931e-06	2.06689e-05
AT2G16340	60.6465	71.2695	0.850947	0.00245945	0.0190418
AT2G16365	11.5906	15.1593	0.764586	0.000188064	0.00215134
AT2G16400	6.59015	11.4203	0.577054	7.3166e-12	3.61376e-10
AT2G16430	2.69736	3.8565	0.699432	0.00070961	0.00673248
AT2G16485	32.4166	44.0344	0.736167	1.17177e-06	2.32595e-05
AT2G16600	6.12709	12.1642	0.503698	7.76905e-18	7.16844e-16
AT2G16660	722.426	830.21	0.870172	0.00024729	0.00273928
AT2G16700	24.9571	30.6075	0.81539	0.000145609	0.00172044
AT2G17040	3.40958	4.78916	0.711936	0.000486461	0.00493603
AT2G17130	78.5423	92.0784	0.852994	0.000510118	0.005145
AT2G17230	30.4359	44.7755	0.679744	2.90968e-12	1.50809e-10
AT2G17240	6.95673	9.75889	0.712861	0.00122934	0.0106414
AT2G17280	8.65785	10.9032	0.794067	0.00186677	0.0151151
AT2G17300	47.2463	74.0436	0.638088	3.36224e-37	1.00825e-34
AT2G17360	1.12478	3.62905	0.309937	3.71629e-07	8.26966e-06
AT2G17450	15.3736	18.8207	0.816848	0.00745576	0.0463378
AT2G17500	14.5953	21.527	0.678002	1.23516e-06	2.43166e-05
AT2G17550	42.9765	51.7525	0.830423	0.00326381	0.0239237
AT2G17720	17.7255	26.3083	0.673758	1.98363e-08	5.74329e-07
AT2G17820	19.2316	26.4781	0.72632	2.45868e-07	5.68714e-06
AT2G17840	45.4522	56.7415	0.80104	0.000229893	0.002555
AT2G18020	92.0371	124.992	0.736346	1.64582e-19	1.71666e-17
AT2G18160	10.6115	16.9106	0.627505	1.62351e-08	4.78308e-07
AT2G18220	142.807	174.16	0.81998	7.86857e-09	2.46524e-07
AT2G18230	10.864	15.1125	0.718874	3.73805e-05	0.000521804
AT2G18290	36.1028	43.8193	0.823903	0.0028539	0.0215492
AT2G18300	108.098	128.946	0.838321	1.18099e-06	2.33872e-05
AT2G18510	10.6953	15.8818	0.673431	3.19056e-07	7.22089e-06
AT2G18660	11.1583	15.3535	0.726761	1.84336e-05	0.000275897
AT2G18690	13.8022	19.2257	0.717905	5.11531e-05	0.000688313
AT2G18700	14.3546	17.697	0.811129	0.00181832	0.0147941
AT2G18750	4.86067	6.13678	0.792055	0.00372398	0.0266568
AT2G18950	14.4201	20.1021	0.717342	1.00658e-05	0.000162378
AT2G18960	5.52969	7.32805	0.754592	0.00298973	0.0223239
AT2G19130	50.6957	60.2066	0.842029	0.000732263	0.00692393
AT2G19460	3.52425	5.08664	0.692845	0.00479183	0.0327703
AT2G19650	28.485	33.1978	0.858038	0.00365921	0.0263053
AT2G19910	10.562	12.84	0.822583	0.00110814	0.00976336
AT2G20140	65.4382	75.2635	0.869455	0.000854634	0.00787699
AT2G20142	8.98774	12.3992	0.724865	8.35928e-05	0.00106599
AT2G20180	3.85673	5.19845	0.7419	0.00165598	0.0136586
AT2G20260	18.0088	23.541	0.764995	0.00213407	0.016833
AT2G20420	8.17625	10.3325	0.791316	0.00385528	0.0273796
AT2G20670	14.5476	21.8069	0.667111	1.95444e-11	9.04157e-10
AT2G20690	26.5664	33.0996	0.802621	0.00515669	0.0346365
AT2G20870	39.2262	47.0949	0.832919	4.97128e-05	0.000670544
AT2G20890	6.02672	8.71222	0.691755	0.00778024	0.0478566
AT2G20990	10.8245	13.4385	0.805486	0.00399531	0.0282023
AT2G21050	4.3484	5.96489	0.728999	0.000812406	0.00754576
AT2G21060	5.29495	7.04176	0.751936	0.00034774	0.00368895
AT2G21130	3.81678	4.97089	0.767826	0.000982568	0.00886158
AT2G21140	8.31435	10.2829	0.808558	0.00485231	0.033097
AT2G21210	582.662	884.295	0.6589	3.39706e-64	2.11285e-61
AT2G21280	8.97676	13.2588	0.677042	8.91454e-06	0.000146361
AT2G21330	83.112	95.4587	0.870659	0.0015526	0.012933
AT2G21380	4.89233	6.87282	0.711836	0.00391697	0.0277543
AT2G21390	20.5267	26.5721	0.772492	6.57002e-05	0.00085927
AT2G21440	76.1702	93.8388	0.811713	1.60977e-07	3.83989e-06
AT2G21520	8.49792	11.0834	0.766727	0.00118165	0.0102815
AT2G21530	2.44778	4.03665	0.606389	0.000296946	0.00320683
AT2G21620	15.9807	22.1344	0.721986	2.44898e-06	4.56445e-05
AT2G21660	6.80894	8.52571	0.798636	0.00774977	0.047706
AT2G21860	63.2724	73.8494	0.856776	0.00658609	0.0419129
AT2G21870	62.5751	90.0419	0.694955	7.19726e-30	1.42192e-27
AT2G21970	13.281	18.3974	0.721898	0.00012798	0.00155174
AT2G22240	40.8908	55.4309	0.73769	4.50379e-10	1.70476e-08
AT2G22300	14.1425	16.7572	0.843966	0.0034845	0.0252765
AT2G22330	7.22427	9.72541	0.742825	9.55794e-06	0.000155379
AT2G22400	9.93249	14.4957	0.685204	1.1331e-05	0.000180705
AT2G22430	16.9998	20.834	0.815964	0.00143054	0.0120719
AT2G22795	26.8975	41.0823	0.654722	2.91838e-14	1.89955e-12
AT2G22810	0.893359	1.78805	0.499628	0.00455078	0.0313459
AT2G22970	8.64539	11.1139	0.77789	0.00791885	0.0484802
AT2G22980	4.79157	6.67991	0.71731	0.000563619	0.00557741
AT2G23000	70.7655	99.2471	0.713023	5.30666e-19	5.33622e-17
AT2G23010	50.9323	59.7604	0.852274	0.00165936	0.0136797
AT2G23130	79.5951	105.133	0.75709	1.72651e-10	6.91963e-09
AT2G23340	41.5107	57.0664	0.727409	2.0945e-12	1.09573e-10
AT2G23390	2.54876	4.04102	0.630722	0.00782305	0.0480514
AT2G23590	55.4607	65.6819	0.844383	0.00325832	0.0238939
AT2G23600	55.5026	64.6798	0.858114	0.000950721	0.00861601
AT2G24120	34.1431	43.9638	0.776617	1.06293e-07	2.64051e-06
AT2G24200	13.0923	16.6227	0.787617	0.000872533	0.00801118
AT2G24280	211.885	244.335	0.86719	0.000260802	0.00286065
AT2G24500	80.1762	91.159	0.87952	0.00639374	0.0411123
AT2G24550	86.9658	127.214	0.68362	1.85146e-29	3.6153e-27
AT2G24762	20.3055	29.5219	0.687812	1.93008e-14	1.2811e-12
AT2G25080	9.0769	11.379	0.79769	0.0063325	0.0408849
AT2G25170	89.2972	104.581	0.853854	0.000508841	0.0051352
AT2G25450	25.9426	33.4932	0.774562	2.19704e-06	4.12695e-05
AT2G25490	22.1472	26.3749	0.839709	0.00350622	0.0254012
AT2G25510	6.28578	9.08058	0.692223	0.000771136	0.00723851
AT2G25660	5.71651	8.02924	0.711962	1.0919e-06	2.1803e-05
AT2G25670	6.03152	7.80134	0.77314	0.00577657	0.037982
AT2G25830	7.31028	12.1204	0.603138	1.12875e-12	6.13432e-11
AT2G25900	20.6438	25.662	0.804449	3.55982e-05	0.000500671
AT2G26010	8.65633	11.5329	0.750578	0.00028732	0.00311288
AT2G26020	35.9837	41.9368	0.858046	0.000522202	0.00524482
AT2G26080	10.7815	15.9885	0.674329	3.42425e-07	7.69791e-06
AT2G26110	2.11375	3.56028	0.593702	6.47487e-05	0.000848147
AT2G26150	24.6297	31.7191	0.776492	0.000800962	0.0074601
AT2G26190	2.28751	3.42158	0.668555	0.00677443	0.0428324
AT2G26200	4.5561	6.57307	0.693147	0.000208121	0.00234719
AT2G26240	8.19811	10.6775	0.767793	0.00383889	0.0272816
AT2G26440	23.8241	30.7588	0.774547	5.42924e-07	1.1659e-05
AT2G26500	0.404075	1.44107	0.280399	0.000817382	0.00757104
AT2G26560	23.1575	29.8718	0.775229	1.07001e-05	0.00017162
AT2G26570	26.6996	32.2375	0.828217	0.00144511	0.0121704
AT2G26670	17.869	25.8248	0.691932	3.32085e-07	7.48551e-06
AT2G26690	39.4892	55.5979	0.710264	2.21494e-15	1.64582e-13
AT2G26695	2.89208	5.50577	0.525282	3.01527e-05	0.000432412
AT2G26910	31.1485	38.9883	0.798918	3.94383e-05	0.000546893
AT2G26990	185.488	219.124	0.846496	1.53428e-05	0.000234656
AT2G27040	25.6857	31.2589	0.82171	0.000313192	0.00336496
AT2G27050	15.3916	21.045	0.731366	4.54467e-12	2.34106e-10
AT2G27150	39.3411	56.3934	0.697618	5.14223e-18	4.79741e-16
AT2G27170	7.68948	9.17025	0.838524	0.00392222	0.0277733
AT2G27420	2.54283	3.8613	0.658543	0.00108046	0.00957985
AT2G27530	11.7885	17.2453	0.683578	2.66073e-06	4.90955e-05
AT2G27660	39.682	54.2805	0.731054	2.60963e-05	0.000378442
AT2G27710	3.62609	5.34063	0.678963	0.000802225	0.00746772
AT2G27720	23.0553	30.0086	0.76829	2.00028e-08	5.78152e-07
AT2G28000	8.93279	12.0325	0.74239	0.000139369	0.00166085
AT2G28140	48.3146	60.1443	0.803312	7.1661e-09	2.26204e-07
AT2G28190	7.96862	10.0838	0.79024	0.000268317	0.00292588
AT2G28350	7.77237	9.9231	0.783261	0.00500823	0.0339126
AT2G28410	10.8777	14.2269	0.764583	4.52753e-05	0.000615635
AT2G28605	11.3849	15.0252	0.757717	0.00180545	0.0147036
AT2G28620	2.63322	3.78336	0.695999	0.00819439	0.0498943
AT2G28630	23.2437	30.407	0.764419	2.24045e-08	6.39861e-07
AT2G28720	6.33957	8.57342	0.739445	7.3413e-05	0.000951253
AT2G28790	6.6284	9.97178	0.664716	1.1752e-06	2.33e-05
AT2G28800	207.125	239.969	0.863133	2.21066e-05	0.000325931
AT2G28810	18.5189	21.63	0.85617	0.00291545	0.0218861
AT2G28950	40.2399	49.7755	0.808427	0.000103186	0.00128833
AT2G29080	4.53429	6.26471	0.723783	0.00258377	0.0198215
AT2G29200	6.49025	8.98507	0.722336	0.000108292	0.0013425
AT2G29630	251.865	292.201	0.861957	1.14916e-05	0.000183092
AT2G29650	10.1598	13.2341	0.767704	0.000617591	0.00597665
AT2G30150	86.7268	113.24	0.765866	6.10827e-11	2.61674e-09
AT2G30250	1.5493	2.41868	0.640555	0.00315206	0.0233081
AT2G30440	72.5757	84.5997	0.857872	0.00539359	0.0358673
AT2G30570	5.63158	7.31823	0.769527	0.000666535	0.00640705
AT2G30600	0.84137	2.25809	0.372603	1.89267e-06	3.60358e-05
AT2G30766	12.0035	15.6988	0.76461	3.62024e-05	0.000507045
AT2G30860	11.69	14.6341	0.798817	0.0060844	0.0395415
AT2G30870	3.817	5.20152	0.733823	0.00148891	0.0124767
AT2G30930	25.4593	31.324	0.812773	5.12703e-06	8.89445e-05
AT2G30950	15.3605	19.2191	0.799232	0.00648545	0.0414738
AT2G30990	166.465	198.62	0.838109	1.04571e-05	0.000168366
AT2G31040	13.906	18.7947	0.739891	3.9849e-07	8.79348e-06
AT2G31070	12.8748	16.1015	0.799602	0.00490542	0.0333607
AT2G31280	31.6478	44.8944	0.704938	4.37302e-13	2.48936e-11
AT2G31360	6.0762	8.68237	0.699832	4.07668e-06	7.20628e-05
AT2G31670	6.11053	8.16812	0.748095	0.000982567	0.00886158
AT2G31840	5.48817	7.79541	0.704026	0.00593251	0.0387493
AT2G31880	6.29934	9.4046	0.669815	0.00250954	0.0193938
AT2G32060	27.0639	35.4034	0.764443	1.28694e-08	3.85234e-07
AT2G32100	22.7476	28.9541	0.785643	4.23822e-05	0.000582426
AT2G32150	7.83759	10.4701	0.748571	0.00193472	0.0155528
AT2G32240	3.22732	5.31782	0.606887	6.24854e-07	1.33162e-05
AT2G32480	8.88604	11.92	0.74547	0.00248729	0.0192395
AT2G32487	20.3318	27.8558	0.729896	2.8497e-07	6.50205e-06
AT2G32500	27.7136	33.4105	0.829486	0.00177942	0.0145198
AT2G32530	6.13018	8.69768	0.704806	0.00116394	0.0101485
AT2G32540	6.61486	8.83061	0.749084	0.00225879	0.0176839
AT2G32680	0.614096	1.32145	0.464713	0.00551652	0.0365439
AT2G32720	228.825	299.849	0.763135	9.07648e-18	8.28377e-16
AT2G32840	9.99047	15.463	0.646087	7.4571e-07	1.55949e-05
AT2G32860	67.5756	84.844	0.796468	3.34237e-05	0.000474057
AT2G32880	20.3761	30.1833	0.67508	5.86257e-15	4.20727e-13
AT2G32920	9.48561	11.712	0.809904	0.00203986	0.0162429
AT2G32990	84.4143	100.662	0.838589	0.000345533	0.00367016
AT2G33255	5.88862	11.7121	0.502783	1.18181e-09	4.15823e-08
AT2G33370	2.63244	6.01571	0.437594	1.58577e-11	7.43851e-10
AT2G33435	46.6466	66.5376	0.701057	9.60929e-11	4.00419e-09
AT2G33770	13.5761	16.7302	0.811473	0.00184018	0.0149502
AT2G33800	8.76247	10.9642	0.799191	0.00447601	0.0309197
AT2G33810	154.526	179.581	0.860486	0.000200838	0.00227116
AT2G33830	148.539	178.575	0.831802	7.83802e-08	2.00952e-06
AT2G33850	17.1339	21.1933	0.808457	0.000542251	0.00540737
AT2G33855	6.33368	8.79242	0.720357	0.00467807	0.0320779
AT2G34200	30.4569	44.8169	0.679585	5.78956e-12	2.90428e-10
AT2G34250	41.3098	56.0955	0.736419	1.1631e-08	3.50662e-07
AT2G34420	30.4409	41.3351	0.736442	4.5073e-10	1.70476e-08
AT2G34430	7.18534	9.68011	0.742279	0.0012534	0.0108051
AT2G34460	5.10122	7.91265	0.644692	0.00296238	0.022169
AT2G34480	11.6996	20.0427	0.583736	3.54048e-17	3.08058e-15
AT2G34510	9.22049	13.0182	0.708274	5.98699e-05	0.000791027
AT2G34560	63.4628	79.4419	0.798858	7.91959e-06	0.000131287
AT2G34620	21.9241	26.4887	0.827678	0.00342653	0.0249098
AT2G34660	14.564	20.4856	0.710941	0.0036262	0.0261005
AT2G34710	4.78488	7.45328	0.641983	1.86328e-05	0.000278187
AT2G34730	4.45032	6.64779	0.669443	1.48422e-05	0.000229507
AT2G34780	4.38417	8.75296	0.500879	4.05398e-10	1.54724e-08
AT2G34810	11.1495	41.8592	0.266357	1.20899e-101	1.3535e-98
AT2G34970	3.80026	7.0601	0.538273	2.92814e-08	8.20906e-07
AT2G35040	6.70733	8.44179	0.794539	0.0069271	0.0435681
AT2G35060	22.4804	27.9762	0.803552	0.000178626	0.0020588
AT2G35260	25.9876	31.8742	0.815317	9.88927e-05	0.00124397
AT2G35370	4.78763	7.75822	0.617104	4.11873e-05	0.000567864
AT2G35390	51.5956	62.9172	0.820056	7.86507e-06	0.000130512
AT2G35410	16.3593	22.4152	0.729829	4.54523e-07	9.89988e-06
AT2G35810	41.6829	51.3947	0.811034	9.40168e-06	0.000153433
AT2G35830	878.114	1028.84	0.8535	1.68822e-07	4.00994e-06
AT2G35860	9.19756	13.2768	0.692754	1.1452e-10	4.73677e-09
AT2G35940	34.7418	57.6805	0.602314	5.70683e-22	7.42905e-20
AT2G35960	1.3483	3.24337	0.415711	6.59014e-11	2.80173e-09
AT2G36000	5.85168	8.67654	0.674425	6.97951e-06	0.000117324
AT2G36120	0.0670018	1.7404	0.0384979	9.38942e-12	4.55712e-10
AT2G36160	3323.87	4031.58	0.824458	5.92839e-11	2.55927e-09
AT2G36170	2694.84	4069.86	0.662147	5.53886e-49	2.21462e-46
AT2G36430	989.484	1181.17	0.837713	8.0987e-08	2.07004e-06
AT2G36460	8.74256	11.0843	0.788731	0.00148977	0.0124776
AT2G36570	2.87439	4.13398	0.695307	0.00644679	0.0413052
AT2G36590	3.86172	7.74955	0.498316	4.31677e-07	9.43788e-06
AT2G36620	169.198	214.378	0.789252	9.22469e-09	2.83718e-07
AT2G36790	7.79009	9.8133	0.79383	0.00258086	0.019811
AT2G36830	6.08067	8.5994	0.707103	1.43427e-06	2.78447e-05
AT2G36880	10.7767	14.2113	0.758316	0.000351439	0.00371411
AT2G36895	9.8969	14.5432	0.680516	6.15915e-05	0.000810585
AT2G37110	8.62672	12.5851	0.685472	4.69197e-07	1.01799e-05
AT2G37170	68.8535	85.3373	0.806839	2.14122e-07	5.04313e-06
AT2G37190	5.25197	7.35214	0.714346	0.00016345	0.00190745
AT2G37220	21.8164	28.6587	0.761248	2.41499e-05	0.000352958
AT2G37230	39.8687	55.6203	0.716801	8.28331e-19	8.27986e-17
AT2G37340	873.946	1084.06	0.806182	7.72193e-09	2.42836e-07
AT2G37540	5.48293	8.64959	0.633895	3.91329e-07	8.65821e-06
AT2G37710	1.64616	3.01986	0.54511	0.000205046	0.00231407
AT2G37760	5.43367	7.55856	0.718876	0.0028236	0.0213589
AT2G38040	5.04407	7.498	0.672723	2.86822e-06	5.24684e-05
AT2G38080	91.9318	110.272	0.833683	0.000320813	0.00343585
AT2G38120	40.5036	54.9077	0.737666	2.31048e-15	1.70175e-13
AT2G38170	18.688	24.4822	0.763329	0.00196224	0.0157514
AT2G38210	55.2671	66.6906	0.828709	4.82181e-05	0.000653006
AT2G38360	32.6572	50.4017	0.647939	5.41167e-10	2.00614e-08
AT2G38400	1.75678	3.00474	0.584669	2.5348e-05	0.000369504
AT2G38470	3.67334	4.77168	0.76982	0.00688997	0.043367
AT2G38530	30.8295	37.855	0.81441	1.27968e-05	0.000201402
AT2G38670	17.2769	22.3691	0.772357	5.38243e-05	0.000720216
AT2G38710	40.1911	46.9847	0.855408	0.00323443	0.0237498
AT2G38780	1.35564	2.28669	0.592837	0.00803604	0.0490903
AT2G38800	7.67259	10.3333	0.742513	0.00056826	0.00560681
AT2G38820	45.2358	54.7781	0.825801	0.00109308	0.00967128
AT2G38860	20.8371	24.3509	0.855703	0.00366631	0.026345
AT2G38995	25.1846	30.1022	0.836635	0.0050499	0.0341259
AT2G39260	27.9469	33.9416	0.823381	0.00813251	0.0495714
AT2G39330	9.33781	12.2511	0.762204	4.37595e-05	0.000597928
AT2G39390	50.9913	62.597	0.814597	0.000874876	0.00802831
AT2G39470	16.8583	20.6868	0.814931	0.000559486	0.00554304
AT2G39570	8.69005	13.0678	0.664997	2.88764e-10	1.1225e-08
AT2G39700	9.02822	13.0308	0.692836	0.00021894	0.00244947
AT2G39730	8.82781	13.0957	0.674098	6.05511e-08	1.5988e-06
AT2G39770	15.5016	18.6796	0.829868	0.00461647	0.0317203
AT2G39800	9.3121	11.3485	0.820557	0.00150148	0.0125523
AT2G39850	3.06514	4.96606	0.617219	0.000603678	0.00586664
AT2G39870	6.30763	8.69721	0.725247	0.00129134	0.0110856
AT2G39950	7.29026	11.5818	0.629457	3.07165e-06	5.57646e-05
AT2G40000	14.8983	19.6071	0.759842	1.05391e-06	2.11956e-05
AT2G40060	50.8239	63.0141	0.806547	0.000274506	0.00298368
AT2G40070	25.6441	31.0683	0.825408	0.00103445	0.00924509
AT2G40080	2.61786	5.19802	0.503627	6.71565e-12	3.35643e-10
AT2G40100	8.71646	11.0228	0.790765	0.00406617	0.0285823
AT2G40140	0.431626	1.08287	0.398595	0.00588449	0.0384956
AT2G40290	19.6162	25.3805	0.772885	0.000724832	0.00686138
AT2G40300	68.5036	79.3301	0.863525	0.00401741	0.0283345
AT2G40340	7.3279	10.1425	0.722495	0.000374521	0.00393084
AT2G40360	1.46295	2.60171	0.562302	0.000258545	0.00283774
AT2G40400	47.6195	55.6647	0.855471	0.000507711	0.00512687
AT2G40430	1.56308	3.225	0.484677	0.00070592	0.00671206
AT2G40460	123.521	145.004	0.851847	0.000119013	0.00145352
AT2G40490	41.0914	51.1661	0.803099	7.70779e-07	1.59996e-05
AT2G40520	31.9551	39.5513	0.807941	1.59758e-05	0.000243228
AT2G40610	11.5162	15.9502	0.722013	1.80406e-06	3.45051e-05
AT2G40670	18.8575	28.324	0.665779	1.15184e-14	7.92737e-13
AT2G40750	70.3045	83.6925	0.840033	0.00338928	0.0246497
AT2G40765	1.87484	3.03431	0.617883	0.0030451	0.0226668
AT2G40780	84.44	105.708	0.798802	4.93368e-06	8.58563e-05
AT2G40840	23.4886	30.993	0.757868	0.00219002	0.0172016
AT2G40900	3.00548	4.88425	0.615342	1.80838e-05	0.000271208
AT2G41010	21.5572	27.585	0.781482	9.00218e-07	1.85035e-05
AT2G41100	21.9203	28.075	0.780777	0.000121164	0.00147443
AT2G41220	56.7764	69.7722	0.81374	1.15515e-05	0.000183871
AT2G41410	15.0633	18.9712	0.794007	0.00147684	0.0124127
AT2G41420	50.7852	61.8966	0.820484	0.0010068	0.00904608
AT2G41430	12.0918	16.472	0.73408	8.86638e-08	2.23228e-06
AT2G41475	29.5231	42.4884	0.694852	6.66954e-15	4.70595e-13
AT2G41530	13.0095	16.7502	0.77668	7.67483e-07	1.59509e-05
AT2G41560	7.87073	10.0984	0.779406	0.00439485	0.030409
AT2G41680	4.91644	7.33297	0.670457	0.00329832	0.024124
AT2G41840	16.5433	22.1094	0.748247	4.81764e-06	8.4011e-05
AT2G41870	8.75588	11.2567	0.777838	2.95617e-05	0.000425026
AT2G41940	21.5491	26.2323	0.82147	0.00290035	0.0218019
AT2G41950	4.3115	7.1029	0.607006	7.55078e-05	0.000975386
AT2G42040	26.8776	33.5572	0.800951	9.84385e-10	3.50228e-08
AT2G42200	2.10258	2.82924	0.743162	0.00638109	0.0410723
AT2G42220	48.9594	67.4569	0.725788	2.5647e-11	1.14851e-09
AT2G42270	56.161	71.0989	0.789899	1.78271e-05	0.000268012
AT2G42320	12.4119	17.774	0.698316	0.000101517	0.00127222
AT2G42380	1.89378	2.73534	0.692336	0.00197108	0.0157997
AT2G42530	16.5606	25.9706	0.637667	1.88424e-14	1.25972e-12
AT2G42540	2.79075	3.81203	0.732089	0.00461547	0.0317203
AT2G42590	9.91534	13.3105	0.744925	0.00381559	0.0271735
AT2G42600	3.22551	4.81461	0.669942	0.000134633	0.00161839
AT2G42610	2.10311	3.78223	0.556049	0.000754922	0.00711414
AT2G42790	7.97786	10.1612	0.785129	0.000360192	0.00379705
AT2G42800	2.76547	5.30251	0.521539	3.11292e-06	5.64528e-05
AT2G42840	33.3591	46.146	0.722902	8.68405e-09	2.68566e-07
AT2G42870	22.8116	27.6383	0.82536	0.00306895	0.0228039
AT2G42900	6.41548	9.2515	0.693452	0.000211911	0.00238225
AT2G42975	35.0356	41.3122	0.848068	0.00112748	0.00989742
AT2G42990	7.62369	9.70657	0.785415	0.000552996	0.0054982
AT2G43010	16.6209	20.4042	0.814585	0.00141547	0.011964
AT2G43020	21.5772	30.7053	0.702717	1.12002e-06	2.23379e-05
AT2G43030	0.617176	1.23805	0.498506	0.00634685	0.0409304
AT2G43100	8.24321	11.154	0.739037	0.00320831	0.0236096
AT2G43120	18.5548	22.8789	0.811	0.000979193	0.00884527
AT2G43290	3.2082	6.17549	0.519505	1.77176e-10	7.08409e-09
AT2G43530	85.382	105.321	0.810685	1.00377e-08	3.05923e-07
AT2G43550	3.08256	4.59166	0.671339	0.000103522	0.00129156
AT2G43590	41.8292	48.8955	0.855481	0.00635644	0.0409765
AT2G43630	18.8005	25.1206	0.74841	0.000167764	0.00194831
AT2G43650	10.0386	13.4023	0.74902	0.000861688	0.00792587
AT2G43680	45.2021	54.5211	0.829077	0.000865391	0.00794995
AT2G43710	13.754	18.6248	0.73848	3.27529e-06	5.88886e-05
AT2G43750	75.1653	85.8139	0.875911	0.00392296	0.0277733
AT2G43800	19.0576	24.0371	0.792843	0.00352268	0.0255094
AT2G43820	16.2362	20.6437	0.786495	0.000269006	0.00293148
AT2G43970	39.255	46.0492	0.852459	0.00175251	0.0143351
AT2G44040	45.8244	52.9587	0.865286	0.00708959	0.0444569
AT2G44060	119.602	138.491	0.86361	0.00648199	0.0414738
AT2G44120	9.97202	12.7859	0.779923	0.00634552	0.0409304
AT2G44160	5.71751	7.67885	0.744578	0.00626504	0.0404805
AT2G44300	84.6818	101.155	0.837146	9.97297e-07	2.03248e-05
AT2G44490	9.72377	13.145	0.739732	4.60797e-06	8.06899e-05
AT2G44500	25.5913	30.8759	0.828843	4.57143e-05	0.000621101
AT2G44650	20.398	25.5294	0.799001	0.00104726	0.00934462
AT2G44670	71.9103	97.1594	0.740127	2.75973e-10	1.07527e-08
AT2G44740	13.197	21.5448	0.612537	1.67466e-06	3.21033e-05
AT2G44760	835.821	966.276	0.864992	7.09791e-06	0.000118957
AT2G45180	6.13339	8.19628	0.748314	0.000557851	0.00553664
AT2G45290	10.19	12.5357	0.812885	0.00579018	0.0380416
AT2G45340	7.16132	9.36622	0.76459	0.00162911	0.01349
AT2G45440	51.2043	64.5395	0.79338	1.02033e-06	2.06689e-05
AT2G45470	2.0288	3.29473	0.615771	0.00158139	0.0131337
AT2G45560	33.3659	47.2449	0.706233	7.68214e-12	3.77211e-10
AT2G45670	18.9059	22.6191	0.835838	0.00163284	0.0135087
AT2G45680	7.76859	10.0813	0.770592	0.00041467	0.00429584
AT2G45720	51.1964	60.5756	0.845166	0.000712425	0.00675536
AT2G45740	4.29214	2.54477	1.68665	1.93306e-06	3.67631e-05
AT2G45960	8.97813	6.2029	1.44741	7.48492e-07	1.56142e-05
AT2G46170	61.3567	56.0366	1.09494	2.59455e-05	0.000376905
AT2G46180	51.1196	42.6565	1.1984	2.56531e-07	5.90937e-06
AT2G46330	18.9952	12.2211	1.55429	8.87421e-12	4.31955e-10
AT2G46400	39.1624	36.0596	1.08604	0.00185594	0.0150492
AT2G46450	9.37917	7.85164	1.19455	0.00648096	0.0414738
AT2G46550	0.819052	0.264451	3.09718	0.00205184	0.0163069
AT2G46600	1.88792	0.89414	2.11144	4.19295e-07	9.19762e-06
AT2G46630	405.497	391.231	1.03646	7.58523e-05	0.000977581
AT2G46780	9.66132	4.49847	2.14769	6.97753e-15	4.90266e-13
AT2G46820	18.2543	10.9538	1.66648	4.80597e-12	2.44565e-10
AT2G47060	443.83	271.144	1.63688	1.61744e-19	1.6976e-17
AT2G47070	25.866	24.4795	1.05664	0.00455964	0.0313941
AT2G47110	5.13058	4.17842	1.22788	0.00648529	0.0414738
AT2G47130	186.278	168.386	1.10625	3.2328e-06	5.83119e-05
AT2G47160	6.47836	5.15659	1.25633	0.00020839	0.00234866
AT2G47170	3.29541	2.51615	1.30971	0.00463031	0.0317894
AT2G47250	43.2533	38.9551	1.11034	9.78556e-06	0.000158466
AT2G47400	384.737	330.721	1.16333	6.8056e-17	5.77205e-15
AT2G47440	101.359	95.7796	1.05825	0.000574586	0.0056394
AT2G47450	101.08	93.2413	1.08407	0.000568806	0.0056089
AT2G47470	45.1333	40.3226	1.1193	0.000169011	0.00196144
AT2G47590	61.6477	57.1508	1.07869	0.00485562	0.0331062
AT2G47610	15.1829	13.8844	1.09353	0.00466809	0.0320226
AT2G47630	13.4229	11.933	1.12485	0.00729503	0.0455241
AT2G47730	5.90837	4.40225	1.34213	2.34613e-07	5.47234e-06
AT2G47800	7.59494	6.54322	1.16074	2.581e-06	4.77868e-05
AT2G47850	16.8147	12.9936	1.29408	2.95145e-06	5.38736e-05
AT2G47890	34.4715	22.3594	1.5417	4.69965e-17	4.0681e-15
AT2G47960	38.2604	34.9479	1.09479	0.000569396	0.00561142
AT2G47990	42.6067	35.5199	1.19952	6.28344e-07	1.33736e-05
AT2G48020	26.2462	20.8863	1.25662	6.18855e-14	3.9515e-12
AT2G48060	22.6076	20.4112	1.10761	0.00017762	0.00205001
AT3G01060	4.22692	2.50834	1.68514	0.000243873	0.0027032
AT3G01120	137.59	119.024	1.15599	1.77892e-08	5.17737e-07
AT3G01160	2313.36	1903.42	1.21537	7.6033e-34	1.96434e-31
AT3G01290	27.4372	24.4907	1.12031	0.000461207	0.00470824
AT3G01310	5.65896	4.78523	1.18259	0.000511165	0.00515246
AT3G01320	19.2486	15.1308	1.27215	0.00415194	0.0290514
AT3G01340	67.696	64.5315	1.04904	0.000340905	0.00363019
AT3G01435	47.3312	41.2108	1.14852	1.09272e-05	0.000174928
AT3G01440	10.5485	7.40188	1.42511	0.000485909	0.00493603
AT3G01470	3.66156	1.32317	2.76727	2.26568e-15	1.6761e-13
AT3G01480	256.037	237.735	1.07698	2.72076e-08	7.64043e-07
AT3G01490	1361.14	966.589	1.40819	1.22763e-59	6.87188e-57
AT3G01500	55.3674	48.5514	1.14039	7.41853e-08	1.91357e-06
AT3G01660	42.1212	37.8147	1.11388	3.18211e-06	5.75831e-05
AT3G02020	13.2049	9.27345	1.42394	8.32974e-08	2.11301e-06
AT3G02050	2.82955	2.05488	1.37699	0.00364328	0.026202
AT3G02080	7.88772	5.53394	1.42534	9.51339e-06	0.000154805
AT3G02110	33.8212	20.4165	1.65656	4.59195e-33	1.13401e-30
AT3G02470	45.1141	40.3889	1.11699	0.000129039	0.0015612
AT3G02490	67.3329	59.8043	1.12589	4.3308e-08	1.17302e-06
AT3G02560	4.61784	3.18619	1.44933	0.00196148	0.0157514
AT3G02630	25.5749	22.7843	1.12248	0.000558218	0.00553701
AT3G02650	7.86898	7.0842	1.11078	0.00220705	0.0173111
AT3G02760	85.087	82.1934	1.0352	0.00672465	0.0426123
AT3G02830	58.056	48.6287	1.19386	2.00774e-11	9.26264e-10
AT3G03150	11.3476	9.82533	1.15494	0.00374322	0.0267522
AT3G03450	2.47052	0.697725	3.54081	2.24443e-09	7.56842e-08
AT3G03470	20.7265	16.2787	1.27323	7.00234e-12	3.46874e-10
AT3G03480	7.11559	5.45783	1.30374	0.000108506	0.00134376
AT3G03560	1.70135	0.975746	1.74364	0.00170886	0.0140396
AT3G03640	3.68997	3.1591	1.16804	0.00633853	0.0409081
AT3G03770	49.5881	47.5397	1.04309	0.00496996	0.0336942
AT3G03780	2.82255	1.245	2.2671	0.000129651	0.00156636
AT3G03920	66.6568	62.2826	1.07023	0.00450038	0.0310497
AT3G03990	2.27459	1.61078	1.41211	0.00613903	0.0398349
AT3G04120	102.366	78.3851	1.30594	9.3278e-31	1.95802e-28
AT3G04140	8.55986	5.34275	1.60214	1.13059e-06	2.25218e-05
AT3G04210	35.2335	23.4881	1.50006	1.08395e-27	1.89612e-25
AT3G04260	12.4071	11.0307	1.12478	7.22939e-05	0.000937476
AT3G04340	10.0456	8.93079	1.12483	0.00330502	0.0241625
AT3G04550	12.2077	11.1605	1.09382	0.00160743	0.013317
AT3G04580	1.38202	0.741268	1.86439	0.00138233	0.0117423
AT3G04720	76.6048	58.6571	1.30598	0.000585197	0.00571682
AT3G04730	36.4403	32.2218	1.13092	0.000575923	0.00564922
AT3G04840	1.81862	1.29632	1.40291	0.00204341	0.016263
AT3G04870	515.257	395.657	1.30228	2.81275e-21	3.39816e-19
AT3G05130	8.42715	6.63878	1.26938	0.00114752	0.0100418
AT3G05180	10.2132	7.19705	1.41909	3.15071e-05	0.000450296
AT3G05320	23.4396	20.4461	1.14641	2.22491e-05	0.000327744
AT3G05345	78.2035	62.8435	1.24442	8.92602e-22	1.13557e-19
AT3G05560	1074.99	1061.5	1.01271	0.00174743	0.0143127
AT3G05800	40.8216	35.1989	1.15974	6.00014e-07	1.28357e-05
AT3G05840	5.96603	4.93359	1.20927	0.00637663	0.0410723
AT3G05900	16.6761	15.2781	1.0915	0.00434916	0.0301177
AT3G05910	36.5991	33.4648	1.09366	0.00151051	0.0126199
AT3G05990	8.63618	7.55932	1.14246	0.0060551	0.0393968
AT3G06035	13.1572	11.7232	1.12231	0.00503789	0.0340585
AT3G06130	17.215	12.1692	1.41464	1.28692e-20	1.51128e-18
AT3G06370	3.69209	2.97806	1.23976	0.000384051	0.0040208
AT3G06400	12.8246	8.56371	1.49755	4.29151e-09	1.40756e-07
AT3G06410	39.8637	27.3963	1.45508	1.56367e-16	1.29994e-14
AT3G06430	7.53453	5.56843	1.35308	3.79145e-06	6.72332e-05
AT3G06483	812.338	599.831	1.35428	1.91526e-35	5.45136e-33
AT3G06500	13.279	11.1018	1.19611	0.00373886	0.0267519
AT3G06510	9.04508	5.61514	1.61084	3.21914e-11	1.43013e-09
AT3G06530	6.63718	4.21071	1.57626	1.5889e-05	0.000242127
AT3G06550	276.726	230.866	1.19864	1.17277e-19	1.25442e-17
AT3G06650	16.9177	13.7547	1.22996	8.60055e-06	0.000142003
AT3G06750	3.59065	2.95973	1.21317	0.00106932	0.00949609
AT3G06980	5.15193	3.80493	1.35401	0.0057222	0.0377724
AT3G07050	60.1731	56.1899	1.07089	0.00138126	0.0117423
AT3G07100	3.60315	1.97374	1.82555	5.94652e-06	0.000102144
AT3G07110	23.1545	19.9469	1.16081	0.000200319	0.00226926
AT3G07195	1988.9	1041.24	1.91012	5.09688e-20	5.63104e-18
AT3G07310	2.22096	0.974282	2.27958	4.98266e-08	1.33239e-06
AT3G07470	112.506	103.057	1.09169	8.38347e-05	0.00106816
AT3G07780	48.8388	41.2399	1.18426	9.08121e-10	3.2447e-08
AT3G08510	2.91389	2.16248	1.34748	0.00101723	0.00913004
AT3G08530	3.71466	3.32107	1.11851	0.00783708	0.0481199
AT3G08590	7.537	6.75696	1.11544	0.00539729	0.0358673
AT3G08600	59.4542	42.443	1.4008	2.94164e-24	4.29556e-22
AT3G08640	5.86487	5.17209	1.13394	0.00214758	0.0169157
AT3G08670	3.94595	3.32915	1.18527	0.00287169	0.0216446
AT3G08680	16.0095	14.2265	1.12533	0.00287154	0.0216446
AT3G08690	225.655	201.965	1.1173	4.29769e-10	1.63653e-08
AT3G08770	27.2861	24.5572	1.11112	0.00482827	0.0329598
AT3G08920	1.91654	0.666735	2.87452	8.46035e-08	2.14291e-06
AT3G08940	159.477	145.418	1.09668	1.36406e-07	3.29591e-06
AT3G08970	24.0929	19.8165	1.2158	2.05864e-06	3.8931e-05
AT3G09070	8.58662	7.26455	1.18199	0.000225445	0.00251463
AT3G09200	3.50243	2.47047	1.41772	0.00118439	0.0103001
AT3G09210	5.11504	3.72864	1.37182	0.00115295	0.0100684
AT3G09410	10.993	8.13514	1.35129	3.15174e-07	7.14267e-06
AT3G09440	13.3565	9.75044	1.36983	5.71849e-09	1.82916e-07
AT3G09530	14.5218	12.4791	1.16369	0.000163011	0.00190365
AT3G09630	11.7059	10.1284	1.15576	8.8219e-05	0.00112062
AT3G09770	72.3024	65.6029	1.10212	0.00015774	0.00184981
AT3G09820	57.5898	53.4868	1.07671	0.000428335	0.00442376
AT3G09840	119.836	100.736	1.1896	5.60013e-13	3.14525e-11
AT3G09850	656.243	602.866	1.08854	4.55774e-08	1.2325e-06
AT3G10020	78.8588	77.071	1.0232	0.00766914	0.0472963
AT3G10080	86.5971	71.9676	1.20328	2.71692e-14	1.78777e-12
AT3G10150	876.422	714.637	1.22639	1.20658e-08	3.61822e-07
AT3G10185	23.5667	15.5251	1.51797	3.74537e-19	3.78892e-17
AT3G10450	4.00792	3.20986	1.24862	0.00129134	0.0110856
AT3G10490	163.007	151.138	1.07852	9.43084e-05	0.00119161
AT3G10520	8.46841	6.51959	1.29892	3.86541e-09	1.28284e-07
AT3G10680	4.1604	2.42333	1.71681	5.29203e-05	0.000709817
AT3G10840	42.4149	30.1139	1.40848	4.46827e-18	4.19193e-16
AT3G10870	76.5219	61.4283	1.24571	4.56066e-22	5.98338e-20
AT3G10940	29.0979	25.9995	1.11917	2.40319e-05	0.00035178
AT3G11010	18.0141	13.3335	1.35104	2.3692e-07	5.51053e-06
AT3G11070	165.97	123.104	1.34821	1.62215e-21	2.01784e-19
AT3G11170	19.2325	16.7922	1.14533	7.48026e-07	1.56142e-05
AT3G11400	14.307	12.6449	1.13144	0.000159812	0.0018702
AT3G11410	72.0673	60.9838	1.18175	0.00778279	0.0478566
AT3G11450	65.1821	57.3686	1.1362	7.66055e-08	1.96703e-06
AT3G11510	1.10602	0.7123	1.55275	0.0077774	0.0478566
AT3G11660	5.41155	4.1538	1.3028	1.14382e-09	4.03531e-08
AT3G11700	0.529067	0.106176	4.98293	0.00102224	0.00916036
AT3G11710	17.5024	13.8403	1.26459	1.01312e-06	2.05973e-05
AT3G11820	39.8727	36.9438	1.07928	0.00402624	0.0283848
AT3G11900	4.86102	1.58871	3.05973	1.53564e-18	1.48207e-16
AT3G11964	55.2256	46.4536	1.18883	1.18781e-08	3.57472e-07
AT3G12020	11.0758	9.38806	1.17977	0.000782715	0.0073163
AT3G12050	14.8023	9.41128	1.57283	2.0307e-08	5.84931e-07
AT3G12120	16.2775	5.17707	3.14416	3.22232e-31	6.9375e-29
AT3G12145	132.637	118.924	1.11531	1.49379e-05	0.000230139
AT3G12490	12.5093	11.5035	1.08743	0.00815952	0.049718
AT3G12810	34.5293	16.202	2.13118	1.02717e-58	5.56425e-56
AT3G12930	142.073	133.312	1.06572	0.000128448	0.00155517
AT3G13040	75.3887	72.466	1.04033	0.00674294	0.0426655
AT3G13080	1.63676	0.998829	1.63868	0.00560464	0.0370546
AT3G13110	25.2359	22.9398	1.10009	0.00316487	0.0233514
AT3G13120	5.06982	4.2006	1.20693	0.00012007	0.0014643
AT3G13175	5.86506	4.5711	1.28307	4.18682e-08	1.13954e-06
AT3G13230	57.2217	48.6158	1.17702	3.71351e-10	1.42702e-08
AT3G13330	5.4446	2.2766	2.39154	9.11387e-11	3.81669e-09
AT3G13380	23.5228	21.1456	1.11242	0.00378761	0.0270201
AT3G13410	69.0222	64.907	1.0634	0.00602071	0.0392187
AT3G13510	138.678	120.778	1.14821	4.1068e-13	2.37812e-11
AT3G13520	8.45572	6.52698	1.2955	0.003761	0.0268531
AT3G13690	12.5973	9.49326	1.32697	2.01108e-05	0.000298339
AT3G13750	16.5379	15.2427	1.08497	0.00257046	0.0197554
AT3G13790	3.27614	1.91614	1.70976	0.000210146	0.00236686
AT3G13920	17.7059	13.4471	1.3167	3.38108e-05	0.000478739
AT3G13980	5.56221	3.90645	1.42385	0.00080858	0.0075227
AT3G14067	60.1462	54.6976	1.09961	0.000164622	0.00191979
AT3G14100	9.60722	6.81983	1.40872	5.99106e-09	1.9127e-07
AT3G14200	11.2229	9.47326	1.18469	0.000899428	0.00820875
AT3G14210	19.9802	16.2544	1.22922	2.48164e-06	4.61508e-05
AT3G14395	16.473	13.5934	1.21184	1.90162e-05	0.000283353
AT3G14420	2.75935	2.15099	1.28283	0.00613075	0.0397966
AT3G14440	6.08941	5.49037	1.10911	0.00240522	0.0186995
AT3G14620	17.2769	13.0945	1.3194	2.94704e-07	6.70591e-06
AT3G14690	3162.34	1039.85	3.04115	2.62836e-67	1.76552e-64
AT3G14720	1969.74	274.544	7.17461	0	0
AT3G14900	9833.75	6116.28	1.6078	1.35938e-88	1.26823e-85
AT3G14930	1495.61	1290.07	1.15933	1.96332e-14	1.29804e-12
AT3G15190	15.7155	15.0287	1.0457	0.00459616	0.0316066
AT3G15353	4.94455	4.05927	1.21809	4.3201e-05	0.000591742
AT3G15356	1.35534	0.961362	1.40982	0.000349869	0.00370314
AT3G15360	6.76204	4.84728	1.39502	3.43093e-08	9.47625e-07
AT3G15450	4.40416	3.47726	1.26656	0.00102364	0.00916799
AT3G15690	40.1475	36.5692	1.09785	0.000460833	0.00470728
AT3G15730	41.2387	37.9809	1.08578	0.00456609	0.0314255
AT3G15750	4.92114	4.09838	1.20075	0.000401096	0.00417063
AT3G15770	1516.34	1301.05	1.16547	2.47316e-21	3.00955e-19
AT3G15850	14.7622	12.5996	1.17164	0.000793456	0.0074025
AT3G15920	25.8869	22.7877	1.13601	5.50692e-05	0.000734798
AT3G16000	32.6552	29.539	1.10549	0.000521389	0.00523979
AT3G16080	43.0609	35.7816	1.20344	1.28013e-07	3.12007e-06
AT3G16150	8.23651	7.10611	1.15908	0.00296888	0.0221979
AT3G16240	5.24383	3.68046	1.42477	2.63441e-05	0.000381706
AT3G16250	55.437	42.3401	1.30933	5.55081e-12	2.80767e-10
AT3G16370	2.03045	1.40597	1.44416	0.00141806	0.0119726
AT3G16470	2.13913	0.366523	5.83628	9.0827e-13	5.01567e-11
AT3G16530	20.7745	14.5737	1.42547	8.59338e-12	4.19502e-10
AT3G16640	0.901784	0.423414	2.12979	0.00209866	0.0166005
AT3G16660	3.81811	2.57711	1.48154	0.00253901	0.0195406
AT3G16670	53.9019	50.0373	1.07723	0.00102492	0.00917461
AT3G16780	35.1782	31.7932	1.10647	0.00360253	0.0259868
AT3G16800	22.7848	21.0183	1.08404	0.00109795	0.00970415
AT3G16850	19.389	16.6019	1.16788	0.00038718	0.00404851
AT3G16910	4.26421	2.86054	1.4907	4.45768e-05	0.000607612
AT3G16990	14.4372	10.0949	1.43015	1.06829e-22	1.45852e-20
AT3G17020	161.551	156.166	1.03448	0.0004862	0.00493603
AT3G17170	40.9192	33.3295	1.22772	3.19896e-08	8.93845e-07
AT3G17390	286.036	264.99	1.07942	1.55971e-06	3.00715e-05
AT3G17640	142.327	129.513	1.09894	5.42286e-07	1.1659e-05
AT3G17650	5.30066	3.45809	1.53283	6.85508e-05	0.000894463
AT3G17750	22.1971	15.9211	1.3942	7.43899e-15	5.18352e-13
AT3G17790	7.44744	6.08747	1.2234	4.42932e-05	0.000604728
AT3G17840	2.7364	2.20139	1.24304	0.00300859	0.0224249
AT3G18060	180.542	158.962	1.13576	2.71525e-07	6.20369e-06
AT3G18080	26.7665	24.8933	1.07525	0.00280189	0.0212234
AT3G18130	61.2811	54.1096	1.13254	2.74462e-06	5.04272e-05
AT3G18190	71.7958	65.9603	1.08847	0.000349423	0.00370212
AT3G18215	3.64122	2.45564	1.4828	4.20907e-05	0.000579369
AT3G18290	223.345	165.744	1.34753	1.12876e-45	4.2123e-43
AT3G18370	3.89139	2.01596	1.93029	1.73736e-08	5.09399e-07
AT3G18390	3.35327	2.14383	1.56415	0.00297345	0.0222222
AT3G19000	6.28541	3.88916	1.61614	9.87848e-06	0.000159816
AT3G19010	9.648	8.19167	1.17778	0.00768549	0.0473797
AT3G19030	13.3578	10.7492	1.24268	0.000224577	0.00250753
AT3G19100	54.3126	48.6454	1.1165	4.1842e-07	9.19701e-06
AT3G19120	4.12018	2.33033	1.76807	1.36445e-05	0.000213543
AT3G19170	35.5437	31.2654	1.13684	3.76065e-06	6.67575e-05
AT3G19190	11.9728	8.85488	1.35211	0.000182923	0.00209681
AT3G19350	53.7771	50.076	1.07391	0.000891123	0.00815511
AT3G19450	49.4969	46.0299	1.07532	0.00619181	0.0401309
AT3G19510	21.2533	14.5035	1.46539	2.34358e-15	1.71859e-13
AT3G19553	17.1466	14.2927	1.19968	7.74589e-05	0.000995994
AT3G19680	546.33	474.336	1.15178	1.25875e-11	6.02227e-10
AT3G19710	17.685	16.4433	1.07552	0.000876388	0.00803339
AT3G19800	9.5677	8.54359	1.11987	0.00107999	0.00957985
AT3G19930	50.2888	46.2939	1.08629	0.00042007	0.00434642
AT3G20080	9.84789	8.38317	1.17472	0.000331255	0.00353416
AT3G20100	15.2952	12.795	1.19541	0.00183621	0.0149252
AT3G20390	84.1856	81.3731	1.03456	0.00328087	0.0240368
AT3G20410	8.72019	7.46627	1.16794	0.000847066	0.00781152
AT3G20440	4.49237	3.36138	1.33647	2.6035e-05	0.000377878
AT3G20540	49.3133	44.9299	1.09756	0.00643005	0.0412338
AT3G20770	955.959	893.184	1.07028	1.36663e-05	0.000213654
AT3G20810	287.542	273.109	1.05285	0.000133493	0.00160723
AT3G20820	25.3582	22.7319	1.11554	0.00100676	0.00904608
AT3G21055	13.9392	11.8067	1.18062	0.000323648	0.003464
AT3G21190	241.261	233.198	1.03457	0.000138467	0.00165382
AT3G21215	45.5253	38.8429	1.17204	1.2239e-06	2.418e-05
AT3G21560	307.422	283.413	1.08472	2.14828e-10	8.5085e-09
AT3G21670	62.6993	56.6673	1.10645	4.76145e-06	8.32039e-05
AT3G21690	71.9706	57.014	1.26233	3.41451e-17	3.00209e-15
AT3G21750	25.0124	15.4673	1.61712	9.79421e-20	1.05432e-17
AT3G21760	113.986	106.402	1.07128	1.06373e-06	2.13165e-05
AT3G21950	6.06575	4.65392	1.30336	2.00864e-06	3.80283e-05
AT3G22060	5.55082	4.70097	1.18078	0.00205137	0.0163069
AT3G22104	1.37824	0.916686	1.5035	0.00505941	0.0341568
AT3G22230	111.349	100.427	1.10876	1.86364e-05	0.000278187
AT3G22231	22.069	18.8724	1.16938	6.4742e-06	0.000109931
AT3G22235	6.69118	4.48148	1.49307	1.2431e-05	0.000196566
AT3G22270	2.66448	0.859431	3.10029	1.52637e-05	0.000233713
AT3G22310	4.65515	4.27806	1.08815	0.00405231	0.0285207
AT3G22330	66.0769	48.9129	1.35091	9.24028e-29	1.76332e-26
AT3G22380	41.0484	36.0891	1.13742	0.00061899	0.00598428
AT3G22400	18.0821	16.2927	1.10983	8.17158e-09	2.55066e-07
AT3G22550	1.60612	0.792221	2.02737	0.00378038	0.02698
AT3G22660	8.49128	7.0867	1.1982	0.00012821	0.00155341
AT3G22740	149.634	103.606	1.44425	3.7736e-44	1.3483e-41
AT3G22970	52.7553	48.6478	1.08443	0.000329019	0.00351477
AT3G23050	3.50571	2.43813	1.43787	1.04927e-05	0.000168778
AT3G23070	10.1123	8.71633	1.16016	0.00255637	0.0196562
AT3G23080	8.60442	7.02539	1.22476	0.00227813	0.0178186
AT3G23280	14.7861	12.5829	1.17509	0.00149276	0.0124902
AT3G23290	1484.03	1362.2	1.08943	3.32878e-06	5.95317e-05
AT3G23410	10.8974	9.63694	1.13079	5.90465e-06	0.000101595
AT3G23530	4.12867	3.20992	1.28622	0.00143304	0.0120869
AT3G23820	31.582	28.8634	1.09419	0.0026604	0.0203166
AT3G23890	1559.84	996.014	1.56608	5.77632e-130	1.0778e-126
AT3G23990	29.1084	22.816	1.27579	1.52442e-05	0.000233713
AT3G24080	5.81524	4.91593	1.18294	0.000316864	0.00339789
AT3G24100	5.7392	4.75056	1.20811	0.00498151	0.0337453
AT3G24190	2.20976	1.87346	1.17951	0.00759449	0.0469773
AT3G24420	50.1734	43.5252	1.15274	1.41101e-10	5.75124e-09
AT3G24480	5.06548	4.27871	1.18388	0.00185329	0.0150422
AT3G24550	217.614	213.549	1.01903	0.000429169	0.00442965
AT3G24760	18.4397	15.3807	1.19888	0.0066231	0.0420816
AT3G24830	5.77658	4.48405	1.28825	0.000449183	0.00459947
AT3G25230	2.4128	1.58775	1.51964	1.55322e-05	0.00023712
AT3G25500	8.08506	6.85135	1.18007	0.000150324	0.0017715
AT3G25520	4.39118	3.72221	1.17972	0.00736627	0.0458664
AT3G25570	21.0331	17.7705	1.1836	2.12575e-07	5.01371e-06
AT3G25690	18.0005	16.2668	1.10658	0.0030143	0.0224575
AT3G25760	53.2964	50.3802	1.05788	0.000989082	0.00891076
AT3G25770	24.2303	22.1199	1.09541	0.00573176	0.0378206
AT3G25882	18.5562	15.5295	1.1949	6.78293e-10	2.48161e-08
AT3G26020	14.8458	13.7275	1.08146	0.00282676	0.0213635
AT3G26070	6.88328	4.16421	1.65296	1.39677e-11	6.58876e-10
AT3G26210	15.282	13.2646	1.15209	1.393e-06	2.71061e-05
AT3G26280	18.5729	15.8188	1.1741	0.000124227	0.0015106
AT3G26520	56.5086	48.8981	1.15564	9.7585e-16	7.44884e-14
AT3G26570	24.1017	21.4215	1.12512	0.00111784	0.00983339
AT3G26590	55.8074	50.7268	1.10016	3.7567e-05	0.000523538
AT3G26600	95.4222	89.2047	1.0697	0.00209553	0.0165835
AT3G26618	5.54816	4.38672	1.26476	3.26165e-06	5.87062e-05
AT3G26630	10510.2	9997.3	1.05131	0.000158387	0.0018561
AT3G26730	1.939	1.75738	1.10334	0.00406297	0.0285718
AT3G26740	13.8348	11.5528	1.19753	1.00111e-08	3.05667e-07
AT3G26744	17.2938	13.8363	1.24988	2.53743e-06	4.70841e-05
AT3G26810	246.405	236.927	1.04	0.000478027	0.00485927
AT3G26910	676.97	655.776	1.03232	0.00200204	0.016002
AT3G26960	5.09122	4.00438	1.27141	6.24915e-06	0.000106757
AT3G27300	12.7058	7.76314	1.63668	5.24292e-13	2.96446e-11
AT3G27570	4.59809	3.63193	1.26602	0.000438978	0.00451148
AT3G27690	27.7208	17.2526	1.60676	2.29771e-22	3.06233e-20
AT3G27770	20.1236	18.5556	1.0845	0.00236619	0.0184301
AT3G28070	82.1773	71.8682	1.14344	1.04614e-08	3.18259e-07
AT3G28080	9.10831	7.09828	1.28317	1.65188e-05	0.000250136
AT3G28100	8.2136	6.18228	1.32857	0.00454914	0.0313459
AT3G28180	7.9728	7.10662	1.12188	0.000579597	0.00567201
AT3G28200	2.20989	1.30596	1.69216	0.00109649	0.00969633
AT3G28220	8.75911	7.18651	1.21883	5.68351e-05	0.000754492
AT3G28320	4.25615	3.12838	1.3605	0.00423465	0.0295018
AT3G28370	60.4281	49.1329	1.22989	5.36253e-14	3.43714e-12
AT3G28460	3.66158	2.89464	1.26495	0.00310545	0.0230446
AT3G28500	99.9885	90.2808	1.10753	7.42259e-07	1.55421e-05
AT3G28540	16.5152	10.8543	1.52153	1.17226e-14	8.03499e-13
AT3G28910	5.61364	4.29821	1.30604	0.00642021	0.0412168
AT3G28920	4.83989	4.15958	1.16355	0.00139949	0.0118534
AT3G28930	18.6031	16.1844	1.14945	4.76709e-06	8.32159e-05
AT3G28940	36.8094	26.8006	1.37346	1.0756e-18	1.05015e-16
AT3G29030	10.1619	5.62553	1.80639	1.83903e-22	2.47063e-20
AT3G29290	45.9433	41.907	1.09632	0.00060986	0.0059233
AT3G29320	5.77477	2.98464	1.93483	1.31613e-07	3.19851e-06
AT3G29390	75.9007	73.3164	1.03525	0.00751604	0.0466261
AT3G29760	11.5435	10.1856	1.13332	0.00586076	0.0383703
AT3G29810	4.22153	3.10927	1.35773	0.000194716	0.00221686
AT3G30390	36.0491	32.7149	1.10192	1.65898e-05	0.000250758
AT3G43340	11.3622	8.6896	1.30756	0.000368278	0.0038747
AT3G44010	63.801	57.4662	1.11024	2.00194e-06	3.79442e-05
AT3G44020	0.892647	0.337292	2.64651	0.00681756	0.043008
AT3G44100	5.49521	2.02847	2.70904	7.53271e-12	3.70958e-10
AT3G44310	3.24505	2.37563	1.36597	0.00271789	0.0206676
AT3G44590	17.8607	15.1963	1.17534	4.65937e-07	1.01353e-05
AT3G44735	27.5091	24.6529	1.11586	0.000728216	0.00688954
AT3G44750	151.612	125.973	1.20353	9.04782e-18	8.28377e-16
AT3G44860	18.8539	15.1858	1.24154	1.60509e-07	3.83419e-06
AT3G44990	275.966	247.117	1.11674	1.59391e-09	5.46255e-08
AT3G45030	11.7033	9.7199	1.20406	4.27169e-06	7.53514e-05
AT3G45050	7.88278	5.80377	1.35822	0.000146915	0.00173255
AT3G45140	5.35011	4.41274	1.21243	7.82147e-05	0.00100417
AT3G45160	7.8274	6.23032	1.25634	0.000856306	0.00788806
AT3G45310	5.55453	2.70301	2.05494	1.75229e-09	5.98094e-08
AT3G45620	18.5557	15.5647	1.19216	7.5678e-05	0.000976119
AT3G45640	1.42301	0.97977	1.45239	0.00210381	0.0166256
AT3G45780	3.19383	1.16909	2.73189	6.96828e-13	3.87478e-11
AT3G45830	5.59697	3.18813	1.75557	6.08435e-11	2.61316e-09
AT3G45850	0.994566	0.296871	3.35016	0.000141524	0.00168196
AT3G45970	10.0431	8.73092	1.15029	0.00151971	0.0126904
AT3G46010	12.557	11.1965	1.12151	0.00375619	0.0268302
AT3G46090	20.4284	19.2436	1.06157	0.000885522	0.0081127
AT3G46100	427.918	320.241	1.33623	4.25825e-54	2.04311e-51
AT3G46290	31.0117	24.9639	1.24226	1.23728e-07	3.02882e-06
AT3G46460	64.4334	40.1473	1.60492	4.63382e-24	6.59456e-22
AT3G46490	3.72397	2.26016	1.64766	6.59268e-06	0.000111604
AT3G46530	41.9927	38.3656	1.09454	0.000319705	0.00342617
AT3G46550	41.1039	38.7739	1.06009	0.00133425	0.0114026
AT3G46600	36.8121	24.089	1.52817	1.15194e-17	1.04003e-15
AT3G46630	7.77506	6.31944	1.23034	0.000708574	0.00672645
AT3G46640	5.67369	4.14185	1.36985	0.000114847	0.00141293
AT3G46780	9.45951	6.69353	1.41323	0.00018828	0.00215234
AT3G46900	15.1758	12.0518	1.25921	1.20409e-06	2.38166e-05
AT3G46970	3.15524	2.67247	1.18065	0.0036157	0.0260483
AT3G47000	280.385	252.492	1.11047	3.21738e-08	8.975e-07
AT3G47070	19.5354	15.9016	1.22852	7.13598e-07	1.49981e-05
AT3G47090	88.3919	74.5911	1.18502	1.51997e-09	5.27373e-08
AT3G47160	154.974	126.612	1.22401	3.6452e-06	6.49139e-05
AT3G47420	15.337	13.9715	1.09773	0.00724794	0.0452514
AT3G47430	2.90605	2.00008	1.45297	0.00798777	0.048831
AT3G47470	13.5564	11.6802	1.16063	0.00229082	0.0179095
AT3G47500	69.7188	63.223	1.10275	2.90694e-06	5.31188e-05
AT3G47620	18.2822	11.5434	1.58378	4.3946e-13	2.4932e-11
AT3G47640	104.975	99.8351	1.05148	0.00408025	0.0286573
AT3G47800	21.1297	19.0101	1.1115	0.000333042	0.00355097
AT3G47860	215.982	198.727	1.08683	1.35552e-06	2.64075e-05
AT3G47930	74.7008	69.0667	1.08158	0.000811288	0.00754372
AT3G48000	4.7485	3.97051	1.19594	0.00331514	0.0242154
AT3G48090	14.307	8.17599	1.74989	3.3554e-13	1.98406e-11
AT3G48170	27.5233	26.1591	1.05215	0.00185485	0.0150476
AT3G48280	2.48424	1.71564	1.44799	0.00196889	0.0157897
AT3G48310	5.36292	4.85755	1.10404	0.0053787	0.0358004
AT3G48460	26.6943	23.3228	1.14456	8.03831e-06	0.000132993
AT3G48500	3.18031	2.62466	1.2117	0.00508406	0.0342337
AT3G48640	27.1725	24.1872	1.12343	0.00286529	0.0216256
AT3G48720	419.91	356.245	1.17871	3.33118e-14	2.15156e-12
AT3G48730	226.134	208.925	1.08237	6.55004e-05	0.000857326
AT3G49010	11.4609	7.26234	1.57813	5.35634e-10	1.99887e-08
AT3G49110	339.983	298.016	1.14082	3.14774e-13	1.87447e-11
AT3G49140	33.8273	21.1499	1.59941	6.13969e-11	2.62351e-09
AT3G49160	50.3164	37.6683	1.33578	4.78842e-15	3.46603e-13
AT3G49220	6.28841	4.65865	1.34983	2.69483e-06	4.95666e-05
AT3G49390	52.1215	47.7263	1.09209	3.59354e-05	0.000504147
AT3G49601	69.5879	62.0528	1.12143	1.8934e-07	4.4846e-06
AT3G49720	127.257	118.006	1.0784	3.32761e-07	7.4907e-06
AT3G49750	22.3763	18.1811	1.23075	0.000316302	0.00339403
AT3G49790	65.6636	63.8597	1.02825	0.00554128	0.0366935
AT3G49910	24.783	23.1246	1.07171	0.00166857	0.0137354
AT3G49990	18.5638	11.1482	1.66518	3.3814e-19	3.46243e-17
AT3G50240	5.24553	2.03765	2.57431	1.19433e-12	6.46981e-11
AT3G50270	22.5969	20.3302	1.1115	0.00125998	0.0108507
AT3G50380	8.79989	7.5942	1.15876	0.00317453	0.023402
AT3G50480	24.4024	17.9694	1.358	1.36058e-07	3.29225e-06
AT3G50500	16.8245	15.4635	1.08801	0.000895105	0.00817818
AT3G50685	11.651	9.69487	1.20177	0.00163299	0.0135087
AT3G50740	227.068	184.403	1.23137	1.65489e-21	2.04343e-19
AT3G50770	2.42101	1.88292	1.28577	0.00549839	0.0364526
AT3G50820	6.20739	5.34617	1.16109	0.000219103	0.00244967
AT3G50840	2.807	1.90484	1.47362	0.00123081	0.0106486
AT3G50890	32.2399	28.6353	1.12588	1.3677e-05	0.000213654
AT3G50910	22.42	18.8706	1.18809	6.16762e-05	0.000811064
AT3G50930	6.8568	4.86947	1.40812	1.34442e-05	0.000210998
AT3G50950	10.475	8.85966	1.18232	0.00305129	0.0226928
AT3G50970	5.77681	4.31265	1.3395	7.52335e-05	0.000972592
AT3G51240	12.9092	11.5654	1.11619	0.00656177	0.0418186
AT3G51550	24.7135	22.7979	1.08403	0.0013613	0.0116042
AT3G51600	70.4984	62.9572	1.11978	0.00111722	0.00983302
AT3G51630	19.4616	15.4156	1.26246	1.14045e-06	2.26914e-05
AT3G51660	13.1426	10.793	1.2177	0.00314783	0.023287
AT3G51740	24.1937	20.6723	1.17034	1.89784e-05	0.000283042
AT3G51800	21.5408	20.0949	1.07195	0.000967252	0.00875165
AT3G51860	13.7956	6.24581	2.20878	3.32009e-22	4.39009e-20
AT3G51895	1.20366	0.488148	2.46577	0.00506057	0.0341568
AT3G51950	68.9308	60.7598	1.13448	1.57292e-05	0.000239909
AT3G51980	6.43389	5.54023	1.1613	0.00481819	0.0329178
AT3G52060	283.008	51.3178	5.51481	0	0
AT3G52150	228.098	50.1467	4.54862	5.16076e-102	6.19033e-99
AT3G52230	43.6247	28.1111	1.55187	4.91958e-21	5.90103e-19
AT3G52360	11.0294	5.84649	1.8865	4.43389e-10	1.68458e-08
AT3G52370	865.116	799.715	1.08178	0.00324784	0.0238274
AT3G52400	24.9618	21.8901	1.14033	0.00813178	0.0495714
AT3G52430	26.6494	25.2698	1.05459	0.0074536	0.0463378
AT3G52470	9.86736	5.33012	1.85125	0.000624352	0.00602918
AT3G52480	18.1142	16.3909	1.10514	0.00293552	0.0220073
AT3G52500	12.0261	1.8268	6.58315	0.000255932	0.00281827
AT3G52520	31.4406	24.1695	1.30084	0.000198961	0.00226086
AT3G52720	3.37785	1.88469	1.79226	1.08523e-06	2.16955e-05
AT3G52750	91.9262	49.1579	1.87002	2.68745e-64	1.73578e-61
AT3G52840	156.469	130.904	1.1953	2.15002e-11	9.83793e-10
AT3G52850	3.10151	2.42217	1.28047	0.00719647	0.0450262
AT3G52870	1.40563	0.106547	13.1926	0.00474048	0.0324528
AT3G52880	7.7046	6.16359	1.25002	3.01059e-06	5.48339e-05
AT3G52930	12.1036	10.7795	1.12283	0.00506791	0.0341714
AT3G52960	19.0812	16.3678	1.16577	0.000438675	0.00451113
AT3G52990	7.32911	6.67638	1.09777	0.00174959	0.0143182
AT3G53100	426.972	390.418	1.09363	1.43486e-09	4.98874e-08
AT3G53190	56.0659	48.5926	1.15379	4.90767e-09	1.59101e-07
AT3G53420	28.5449	18.0507	1.58138	1.67723e-17	1.49025e-15
AT3G53430	9.24311	7.24628	1.27557	0.00123944	0.0107012
AT3G53460	18.2749	14.9288	1.22414	1.73864e-05	0.000261622
AT3G53670	132.456	122.639	1.08005	0.000145022	0.00171745
AT3G53700	13.1953	11.0358	1.19568	0.0016413	0.0135642
AT3G53800	5.03787	4.21921	1.19403	0.00789497	0.048415
AT3G53870	12.8136	10.5801	1.2111	0.00159108	0.0132011
AT3G53920	4.32292	3.61863	1.19463	0.000525903	0.00527568
AT3G53990	35.2177	27.9156	1.26157	2.72029e-10	1.06237e-08
AT3G54050	373.727	333.372	1.12105	1.21533e-11	5.83115e-10
AT3G54120	8.18958	6.29337	1.3013	4.34902e-06	7.63944e-05
AT3G54220	9.23514	6.4904	1.42289	0.000143891	0.00170647
AT3G54390	24.7549	17.7684	1.3932	1.47544e-12	7.86572e-11
AT3G54500	1.87548	0.764913	2.45189	1.01727e-06	2.06565e-05
AT3G54540	1.30047	0.344144	3.77884	7.42958e-08	1.91357e-06
AT3G54660	4.93843	2.44448	2.02024	9.65192e-14	6.07059e-12
AT3G54670	14.7757	13.0923	1.12858	0.000189419	0.00216241
AT3G54790	5.4714	4.15496	1.31683	6.82479e-05	0.000891203
AT3G54810	24.3592	21.4802	1.13403	0.000225691	0.00251495
AT3G54890	3.45966	1.12723	3.06919	3.30361e-08	9.20026e-07
AT3G54900	4.57701	3.33458	1.37259	0.000182124	0.00209051
AT3G54960	666.326	647.711	1.02874	0.00666528	0.0423016
AT3G55110	62.1933	55.1448	1.12782	3.59623e-07	8.03078e-06
AT3G55160	3.60198	1.44454	2.49351	8.49492e-09	2.64176e-07
AT3G55240	56.6628	54.1057	1.04726	0.0078605	0.0482461
AT3G55280	71.2201	65.8358	1.08178	2.70966e-05	0.000391931
AT3G55340	22.2796	19.2294	1.15863	0.00241528	0.0187687
AT3G55420	32.0128	26.4893	1.20852	4.3071e-05	0.000590442
AT3G55430	57.2163	54.1339	1.05694	0.00476662	0.0326185
AT3G55440	14.9137	12.2555	1.2169	8.52475e-08	2.14949e-06
AT3G55480	40.2831	37.573	1.07213	0.000217521	0.00243846
AT3G55510	11.0098	9.65515	1.1403	0.000838812	0.00774391
AT3G55660	22.9764	19.8063	1.16005	1.25239e-05	0.000197664
AT3G55710	54.7049	47.3322	1.15577	2.39169e-06	4.46262e-05
AT3G55760	1966.04	1249.27	1.57375	1.55556e-10	6.27945e-09
AT3G55800	24.1189	22.3028	1.08143	0.000387082	0.00404851
AT3G56090	157.315	152.133	1.03406	0.00134879	0.0115137
AT3G56140	6.5706	5.15185	1.27539	1.06871e-06	2.13907e-05
AT3G56150	15.2033	12.8021	1.18756	3.30222e-06	5.9246e-05
AT3G56160	19.7669	16.5484	1.19449	1.54689e-06	2.98929e-05
AT3G56290	105.163	92.7935	1.1333	4.41061e-09	1.441e-07
AT3G56360	25.0276	23.2542	1.07626	0.000537152	0.00536289
AT3G56370	1.94827	1.14626	1.69968	0.00488849	0.0332762
AT3G56400	17.4664	14.8479	1.17635	0.00258122	0.019811
AT3G56410	13.1945	11.2256	1.1754	6.26741e-06	0.000106851
AT3G56710	91.0593	86.2159	1.05618	0.000135241	0.00162338
AT3G56880	14.7674	12.8735	1.14712	0.00232458	0.0181481
AT3G56910	3.51163	2.35436	1.49155	0.00333205	0.0243177
AT3G56940	142.421	111.198	1.28079	4.0154e-20	4.52555e-18
AT3G56950	11.0981	9.68026	1.14647	9.06127e-06	0.00014831
AT3G57150	61.4319	61.8819	0.992728	0.0032821	0.0240368
AT3G57180	5.38717	4.87457	1.10516	0.00246668	0.0190889
AT3G57240	42.5553	39.9453	1.06534	0.00179828	0.0146595
AT3G57260	10.5692	5.60455	1.88583	1.86848e-14	1.25509e-12
AT3G57330	8.84193	3.52574	2.50782	7.79734e-11	3.28172e-09
AT3G57400	4.39143	2.09996	2.0912	0.00129279	0.0110877
AT3G57430	1.14788	0.379725	3.02293	2.54037e-07	5.85996e-06
AT3G57540	12.426	9.63734	1.28936	4.16248e-07	9.16127e-06
AT3G57630	7.34014	6.18134	1.18747	0.00733672	0.0457163
AT3G57800	17.7235	14.4733	1.22457	0.000571569	0.00561636
AT3G58050	21.15	15.8652	1.33311	3.21546e-09	1.07138e-07
AT3G58140	30.9851	10.836	2.85945	1.33527e-73	1.06777e-70
AT3G58610	13.7464	12.0403	1.14169	0.000136028	0.00162933
AT3G58660	53.6672	50.5524	1.06162	0.00585249	0.0383703
AT3G58680	26.3176	24.7642	1.06273	0.00105248	0.00937653
AT3G58840	14.7495	10.6012	1.39131	8.31471e-10	2.97716e-08
AT3G58990	22.96	20.4847	1.12084	0.000139451	0.00166085
AT3G59040	3.0486	2.57435	1.18422	0.00323349	0.0237498
AT3G59050	6.36867	5.23512	1.21653	9.66764e-06	0.000156859
AT3G59060	194.84	187.342	1.04002	0.00354363	0.025628
AT3G59350	1.09212	0.604491	1.80667	0.00360684	0.0259956
AT3G59540	237.099	209.138	1.1337	1.64051e-07	3.90213e-06
AT3G59680	137.639	120.916	1.1383	7.50241e-09	2.36375e-07
AT3G59820	357.456	345.208	1.03548	3.4721e-05	0.000489974
AT3G59940	3.18495	2.50123	1.27335	0.000930108	0.008452
AT3G59980	7.57311	6.07877	1.24583	0.0041374	0.0290101
AT3G60080	39.8937	32.4381	1.22984	1.58071e-06	3.04413e-05
AT3G60190	145.728	140.002	1.0409	0.00052417	0.00526144
AT3G60245	32.0433	28.33	1.13107	2.05495e-05	0.000304579
AT3G60415	4.47523	3.74422	1.19524	0.00211632	0.0167087
AT3G60440	31.6379	17.7379	1.78363	5.77295e-42	1.90088e-39
AT3G60750	5.48558	4.35569	1.25941	0.00673645	0.0426405
AT3G60860	32.8014	30.9659	1.05928	0.00508431	0.0342337
AT3G61050	1398.52	1109.06	1.26099	4.39366e-33	1.10123e-30
AT3G61220	8.71185	4.63514	1.87952	4.71758e-20	5.28149e-18
AT3G61260	620.524	500.052	1.24092	9.32028e-33	2.23593e-30
AT3G61280	148.995	123.902	1.20252	3.7697e-16	2.97204e-14
AT3G61320	28.2945	23.2904	1.21486	0.000253014	0.00279164
AT3G61470	302.298	266.651	1.13368	3.56429e-16	2.85024e-14
AT3G61490	6.495	5.14309	1.26286	0.000180311	0.00207537
AT3G61580	87.9972	70.9247	1.24071	1.44998e-13	8.98504e-12
AT3G61830	30.1727	26.3297	1.14596	0.000565441	0.00558791
AT3G61870	27.8159	21.2412	1.30953	1.07591e-11	5.17699e-10
AT3G61920	83.0836	71.0081	1.17006	1.45912e-08	4.32152e-07
AT3G61950	5.53503	3.49249	1.58484	0.000285952	0.00310006
AT3G62010	5.8383	4.3627	1.33823	0.00139612	0.011835
AT3G62030	12.3116	11.3909	1.08083	0.000678055	0.00648808
AT3G62150	4.61915	1.83405	2.51855	1.18985e-19	1.26463e-17
AT3G62250	7.07582	4.93309	1.43436	4.60067e-05	0.000624569
AT3G62530	28.446	24.9672	1.13933	3.49788e-05	0.000493198
AT3G62550	52.1839	49.0843	1.06315	0.00806263	0.0492169
AT3G62600	3.23651	2.75747	1.17372	0.00693136	0.0435786
AT3G62650	298.084	289.496	1.02966	0.00324123	0.0237893
AT3G62660	121.378	57.5434	2.10933	1.16002e-93	1.1459e-90
AT3G62780	4.2362	3.12387	1.35607	0.00753776	0.0467091
AT3G62820	97.0738	91.5749	1.06005	3.35937e-05	0.000476066
AT3G62950	3309.05	1170.56	2.8269	1.181e-52	5.36016e-50
AT3G63120	758.189	174.577	4.34301	2.92184e-130	6.1333e-127
AT3G63160	39.6021	35.8173	1.10567	0.00190221	0.0153502
AT3G63210	237.109	217.538	1.08997	0.000120695	0.00146979
AT3G63450	18.37	16.4133	1.11921	0.000998991	0.00898557
AT3G63460	2.73447	1.7882	1.52918	1.80881e-05	0.000271208
AT3G63540	3.57391	3.02294	1.18226	0.00378962	0.027023
AT4G00050	9.32665	7.06824	1.31951	2.22605e-07	5.22096e-06
AT4G00150	48.6174	44.815	1.08485	0.000432181	0.00445253
AT4G00300	6.71603	5.19053	1.2939	1.17902e-05	0.000186962
AT4G00360	75.4588	71.8411	1.05036	0.00763106	0.0471307
AT4G00370	146.113	137.968	1.05903	0.00311498	0.0231051
AT4G00430	89.5016	83.1419	1.07649	0.00579486	0.0380575
AT4G00490	67.9078	58.0779	1.16925	2.59015e-11	1.15682e-09
AT4G00720	157.058	147.083	1.06782	5.41535e-05	0.000724044
AT4G00810	34.3462	30.2256	1.13633	0.000583374	0.00570232
AT4G00820	120.135	101.152	1.18766	3.48493e-10	1.34226e-08
AT4G00870	902.287	871.777	1.035	0.000124927	0.00151801
AT4G00970	8.10478	7.0713	1.14615	0.00760599	0.0470278
AT4G01037	23.889	20.4324	1.16918	0.0009633	0.00872059
AT4G01050	37.7192	34.7037	1.08689	0.000614947	0.00595892
AT4G01070	70.5419	65.2543	1.08103	1.16343e-06	2.31213e-05
AT4G01080	159.911	135.095	1.18369	8.69677e-17	7.26591e-15
AT4G01480	5.55797	4.23478	1.31246	0.000892054	0.00815919
AT4G01690	6.39768	4.9978	1.2801	0.00141258	0.0119504
AT4G01800	4.69942	2.51156	1.87112	3.87962e-07	8.59505e-06
AT4G01870	32.5555	29.657	1.09774	0.00143901	0.0121251
AT4G01950	12.5143	11.1715	1.1202	0.00421736	0.0294291
AT4G02010	3.13073	1.9343	1.61854	0.000274367	0.00298368
AT4G02260	13.6714	11.2985	1.21002	3.46357e-05	0.000489182
AT4G02290	7.8268	6.91444	1.13195	0.00133878	0.0114355
AT4G02350	54.5214	50.1059	1.08812	0.00641043	0.041198
AT4G02380	22.2501	19.8293	1.12208	2.08573e-05	0.000308869
AT4G02540	7.24321	5.87578	1.23272	0.00358898	0.0259002
AT4G02620	81.7885	62.6815	1.30483	4.75974e-09	1.54604e-07
AT4G02630	9.03136	7.21327	1.25205	3.30659e-05	0.000469777
AT4G02770	45.5578	43.1015	1.05699	0.00804376	0.0491196
AT4G02850	32.5093	25.213	1.28939	7.20876e-08	1.86241e-06
AT4G02920	1.18556	0.504418	2.35036	0.000117306	0.00143475
AT4G02940	19.5062	16.824	1.15943	6.97778e-05	0.000909037
AT4G02970	16.2047	11.7243	1.38214	4.60052e-12	2.36258e-10
AT4G03110	19.6605	17.9332	1.09632	0.00537783	0.0358004
AT4G03420	144.661	124.345	1.16339	1.95363e-11	9.04157e-10
AT4G03430	3.26621	2.46627	1.32435	0.00055909	0.00554239
AT4G03450	29.7789	23.2988	1.27813	1.21159e-07	2.97025e-06
AT4G03520	30.0405	25.3533	1.18488	6.13571e-05	0.000808133
AT4G03560	56.7536	47.9089	1.18462	0.000236306	0.00262279
AT4G04210	3.02664	1.96448	1.54068	0.0034938	0.025333
AT4G04330	61.5944	54.2739	1.13488	8.22489e-08	2.09039e-06
AT4G04340	9.17593	5.57945	1.64459	1.89037e-14	1.25972e-12
AT4G04450	51.1026	41.1574	1.24164	1.36905e-09	4.76979e-08
AT4G04610	185.363	166.059	1.11625	5.06728e-09	1.63644e-07
AT4G04695	27.6126	23.0274	1.19912	4.82045e-11	2.10259e-09
AT4G04750	106.526	103.281	1.03141	0.00526144	0.0351873
AT4G04770	284.029	252.06	1.12683	2.23501e-11	1.01714e-09
AT4G04910	7.62509	5.41469	1.40822	8.95328e-06	0.000146829
AT4G04940	19.8051	16.5659	1.19554	0.00110753	0.0097631
AT4G05050	7.24147	5.47649	1.32228	0.00106685	0.00947918
AT4G05070	230.978	152.661	1.51302	2.54129e-49	1.04088e-46
AT4G05180	3.14253	2.54726	1.23369	1.2629e-05	0.000199135
AT4G05320	8.70894	6.62542	1.31447	5.637e-07	1.20897e-05
AT4G05410	104.039	53.2572	1.95353	9.13526e-82	7.67042e-79
AT4G05631	109.902	79.8605	1.37618	2.78923e-33	7.09691e-31
AT4G07825	118.756	112.991	1.05103	0.00143597	0.0121056
AT4G08150	141.237	134.729	1.0483	0.000182428	0.00209256
AT4G08300	15.0121	13.3284	1.12632	0.00514286	0.0345594
AT4G08350	4.61497	2.61725	1.76329	0.000141718	0.00168307
AT4G08470	13.547	6.01288	2.253	4.81324e-35	1.283e-32
AT4G08685	25.7883	17.1978	1.49951	1.76265e-20	2.05557e-18
AT4G08950	366.785	350.775	1.04564	0.000116274	0.00142531
AT4G09010	90.2362	75.2907	1.1985	7.9503e-10	2.85887e-08
AT4G09180	16.0634	9.86043	1.62907	2.18322e-09	7.37684e-08
AT4G09320	30.644	28.0069	1.09416	0.00523555	0.0350302
AT4G09670	10.5173	8.02959	1.30981	7.35584e-07	1.54215e-05
AT4G09730	92.9731	78.9844	1.17711	1.52877e-10	6.21612e-09
AT4G09830	3.12667	2.19299	1.42576	0.00573654	0.0378224
AT4G09890	21.6205	19.2036	1.12586	0.00511854	0.0344098
AT4G09970	97.6728	91.5836	1.06649	7.56808e-05	0.000976119
AT4G10080	76.7328	67.3634	1.13909	8.87785e-09	2.74055e-07
AT4G10120	57.1283	43.7838	1.30478	1.2885e-18	1.25073e-16
AT4G10270	5.95404	4.48322	1.32807	0.000426007	0.00440242
AT4G10300	81.7569	76.1293	1.07392	0.00103967	0.00928681
AT4G10320	8.48427	6.16563	1.37606	0.00124669	0.0107528
AT4G10340	19.6506	17.7758	1.10547	0.0041018	0.0287966
AT4G10450	440.534	290.74	1.51521	8.42981e-07	1.73695e-05
AT4G10480	18.5815	15.1578	1.22587	1.33359e-06	2.60105e-05
AT4G10500	3.80611	3.06491	1.24184	0.0041512	0.0290514
AT4G10610	25.7205	21.1366	1.21687	1.03285e-06	2.08573e-05
AT4G10840	5.35747	4.36935	1.22615	0.0019973	0.0159807
AT4G10920	41.3239	37.0173	1.11634	0.00665276	0.0422381
AT4G11000	2.41557	0.754801	3.20027	1.29307e-08	3.86379e-07
AT4G11211	20.5022	16.0577	1.27678	1.00908e-07	2.51791e-06
AT4G11290	85.826	68.2478	1.25756	4.32463e-08	1.17302e-06
AT4G11320	634.276	621.88	1.01993	0.00225327	0.0176489
AT4G11330	197.759	177.265	1.11561	2.0977e-07	4.95453e-06
AT4G11420	7.40862	5.57129	1.32979	0.000441569	0.00452979
AT4G11600	99.1667	90.7208	1.0931	8.53868e-06	0.000141132
AT4G11660	19.2913	17.4497	1.10554	0.000928255	0.00843973
AT4G11840	884.609	748.602	1.18168	3.18204e-25	4.99402e-23
AT4G11850	170.863	156.337	1.09292	1.47528e-07	3.54426e-06
AT4G11890	77.4027	75.7126	1.02232	0.00353347	0.0255765
AT4G11960	183.281	178.158	1.02876	0.00398217	0.0281213
AT4G12390	75.4316	65.7071	1.148	2.41327e-11	1.08941e-09
AT4G12470	8.31648	6.70142	1.241	0.00099431	0.00895305
AT4G12610	11.6633	9.09655	1.28217	5.42012e-05	0.000724106
AT4G12720	7.24931	6.21214	1.16696	0.00752565	0.0466513
AT4G12730	5.16265	4.36134	1.18373	9.48703e-06	0.000154675
AT4G12800	20.9776	14.6194	1.43492	1.78636e-12	9.43343e-11
AT4G12830	8.65882	7.00412	1.23625	5.102e-05	0.000687072
AT4G12880	41.8842	20.6953	2.02385	3.57215e-56	1.81779e-53
AT4G12900	23.8933	19.5806	1.22025	2.24978e-10	8.88954e-09
AT4G12970	4.33243	3.56152	1.21645	7.16375e-05	0.000931843
AT4G13010	30.7695	28.2593	1.08883	0.00787364	0.0483091
AT4G13020	168.528	164.199	1.02636	0.00210809	0.0166515
AT4G13250	8.04425	6.7501	1.19172	0.00642318	0.0412168
AT4G13350	20.965	20.0357	1.04639	0.00287831	0.0216751
AT4G13430	128.119	114.109	1.12278	3.60912e-05	0.000505909
AT4G13500	277.934	251.412	1.10549	1.87056e-06	3.56553e-05
AT4G13615	3.4535	2.65027	1.30308	0.00410775	0.0288264
AT4G13850	77.8428	66.3382	1.17342	7.83992e-09	2.46086e-07
AT4G13940	29.6811	26.9676	1.10062	0.00447843	0.0309236
AT4G14080	10.0529	8.40286	1.19636	0.0006731	0.00644802
AT4G14230	16.2148	13.2469	1.22405	1.41672e-08	4.20336e-07
AT4G14270	12.035	10.3414	1.16377	0.00112715	0.00989742
AT4G14365	8.50822	7.0985	1.19859	0.00320277	0.0235792
AT4G14400	97.6945	93.5175	1.04467	0.000395708	0.00411973
AT4G14510	66.6021	61.2922	1.08663	0.00226385	0.0177152
AT4G14560	26.6511	24.2245	1.10017	0.0013824	0.0117423
AT4G14710	263.797	234.818	1.12341	1.90701e-12	1.00299e-10
AT4G14760	47.2353	44.061	1.07204	0.00639311	0.0411123
AT4G14870	30.7664	25.7997	1.19251	3.82068e-10	1.46152e-08
AT4G14880	24.9722	23.2761	1.07287	0.000112644	0.00139091
AT4G15000	231.115	220.659	1.04739	0.000861826	0.00792587
AT4G15130	4.80981	4.15757	1.15688	0.0072354	0.0452059
AT4G15160	31.7825	26.1186	1.21686	1.52673e-05	0.000233713
AT4G15200	266.966	259.114	1.0303	0.00136233	0.0116071
AT4G15210	6.25667	4.38752	1.42602	3.66849e-06	6.52596e-05
AT4G15440	125.866	103.126	1.22051	9.02571e-14	5.71958e-12
AT4G15530	14.698	9.99714	1.47022	9.70358e-08	2.42488e-06
AT4G15540	12.611	8.10755	1.55547	7.33297e-15	5.13094e-13
AT4G15545	21.8201	18.1473	1.20239	1.65812e-06	3.18226e-05
AT4G15550	16.516	14.6985	1.12366	3.7835e-05	0.000525963
AT4G15560	17.984	14.3274	1.25521	9.56603e-07	1.95429e-05
AT4G15765	49.6981	46.2354	1.07489	0.0012417	0.0107152
AT4G15800	10.2587	8.11964	1.26345	9.62417e-06	0.000156304
AT4G15802	6.98983	5.56215	1.25668	4.25819e-09	1.39937e-07
AT4G15830	38.9759	36.5406	1.06665	0.000501081	0.00506907
AT4G16140	22.9361	20.2868	1.13059	0.000155865	0.0018291
AT4G16310	122.623	116.375	1.05369	0.00300743	0.0224249
AT4G16340	2.48413	1.59194	1.56044	0.00686642	0.0432512
AT4G16370	27.7819	26.0633	1.06594	0.00790455	0.0484373
AT4G16390	15.9357	13.9416	1.14304	0.00043065	0.00444221
AT4G16447	66.7793	57.4872	1.16164	8.61594e-09	2.67445e-07
AT4G16563	40.9328	39.7473	1.02983	0.00759086	0.0469773
AT4G16590	33.776	28.9092	1.16835	7.54711e-06	0.000125733
AT4G16660	38.4571	34.7513	1.10664	0.00182879	0.0148721
AT4G16690	352.055	182.258	1.93163	1.35387e-134	3.24795e-131
AT4G16720	1.19019	0.707237	1.68287	0.00237439	0.0184855
AT4G16830	320.185	300.638	1.06502	1.64083e-05	0.000248911
AT4G16890	46.5609	42.6178	1.09252	0.000813853	0.00754752
AT4G16920	174.339	126.53	1.37785	5.80505e-61	3.36153e-58
AT4G16990	178.622	168.9	1.05756	3.62487e-05	0.000507271
AT4G17030	146.67	140.387	1.04475	9.0052e-06	0.000147536
AT4G17100	14.1239	12.5275	1.12743	0.000441083	0.00452757
AT4G17140	35.0629	22.7611	1.54047	1.33542e-15	1.00564e-13
AT4G17230	62.1337	55.84	1.11271	0.000467974	0.00476573
AT4G17245	1.54758	0.853978	1.8122	0.00263032	0.0201326
AT4G17340	6.36841	5.03156	1.26569	6.87562e-06	0.00011581
AT4G17390	13.5453	12.2781	1.1032	0.0073032	0.0455582
AT4G17520	58.0173	54.9256	1.05629	0.00492016	0.033424
AT4G17680	29.6659	27.3569	1.0844	0.00123876	0.0107009
AT4G17880	14.6415	12.4187	1.17898	6.95516e-05	0.000906817
AT4G18010	234.784	208.695	1.12501	5.18296e-09	1.66739e-07
AT4G18030	41.125	35.9625	1.14355	1.41103e-07	3.39964e-06
AT4G18100	20.4381	17.8377	1.14578	0.000638039	0.00615427
AT4G18140	3.44089	2.43864	1.41099	0.00253458	0.0195244
AT4G18240	7.29209	6.31818	1.15414	0.000108324	0.0013425
AT4G18250	4.56959	3.91876	1.16608	0.00166743	0.0137328
AT4G18253	29.9356	27.2695	1.09777	0.000713898	0.00676551
AT4G18280	81.7642	67.881	1.20452	1.65337e-08	4.86253e-07
AT4G18390	3.31352	2.54906	1.2999	8.3929e-07	1.73147e-05
AT4G18480	38.0367	34.5283	1.10161	0.00295696	0.0221383
AT4G18520	4.73014	4.08861	1.15691	0.00153699	0.012822
AT4G18670	11.9732	9.6813	1.23674	0.0017577	0.0143705
AT4G18730	10.6405	9.68468	1.0987	0.000535579	0.00535502
AT4G18760	2.60258	2.01967	1.28862	0.00160633	0.0133144
AT4G18810	74.7537	68.5118	1.09111	0.00157142	0.0130638
AT4G18880	10.8731	8.87805	1.22472	2.65899e-06	4.90955e-05
AT4G19110	87.3632	82.3824	1.06046	0.000201287	0.00227318
AT4G19120	4.489	3.68588	1.21789	0.00165385	0.0136521
AT4G19160	161.243	150.628	1.07047	3.69824e-05	0.000516677
AT4G19170	8.96573	6.49554	1.38029	3.20895e-05	0.00045823
AT4G19190	1.33668	0.823208	1.62374	0.00206512	0.01638
AT4G19240	29.3684	22.1193	1.32773	3.44052e-17	3.0092e-15
AT4G19410	24.4226	22.37	1.09176	0.00577087	0.037982
AT4G19430	11.1027	9.44123	1.17598	0.000896708	0.00818837
AT4G19450	106.032	88.5498	1.19742	9.8298e-15	6.79308e-13
AT4G19520	305.143	283.572	1.07607	9.50666e-07	1.94452e-05
AT4G19710	10.762	5.92601	1.81606	1.77984e-10	7.09947e-09
AT4G19840	284.11	274.564	1.03477	0.0027007	0.0205589
AT4G19985	17.07	8.14989	2.09451	1.57446e-17	1.40638e-15
AT4G20170	102.575	99.5805	1.03007	0.00329612	0.0241184
AT4G20260	5.99822	2.35052	2.55187	2.39213e-10	9.42983e-09
AT4G20320	5.36587	3.71491	1.44442	0.00591518	0.0386656
AT4G20890	84.3569	78.3745	1.07633	0.000181826	0.00208852
AT4G20980	2.84499	2.29736	1.23837	0.000537148	0.00536289
AT4G21180	63.1481	42.7509	1.47712	1.9264e-47	7.35229e-45
AT4G21280	66.4242	62.4645	1.06339	0.00542672	0.0360201
AT4G21380	148.855	136.231	1.09267	2.67021e-07	6.11744e-06
AT4G21445	5.03109	3.65164	1.37776	0.00291059	0.0218691
AT4G21650	57.7209	54.4492	1.06009	0.00711017	0.0445194
AT4G21960	1.82829	1.18504	1.54281	0.00585964	0.0383703
AT4G22010	4.32359	3.36996	1.28298	0.00385862	0.0273796
AT4G22120	80.4302	74.4792	1.0799	0.0011511	0.0100626
AT4G22240	90.4461	77.5435	1.16639	2.63585e-08	7.4393e-07
AT4G22570	302.362	290.031	1.04252	0.000394986	0.00411772
AT4G22670	5.9506	5.30266	1.12219	0.00622876	0.0403392
AT4G22690	39.25	36.8463	1.06523	0.00127694	0.0109911
AT4G22880	121.558	78.2621	1.55321	2.23727e-55	1.10502e-52
AT4G22990	47.3776	40.6248	1.16622	9.11689e-07	1.86935e-05
AT4G23140	33.6747	31.4402	1.07107	0.00271868	0.0206676
AT4G23150	11.9325	10.2432	1.16492	2.19e-05	0.000323454
AT4G23160	62.6843	56.7181	1.10519	5.19489e-07	1.12131e-05
AT4G23170	17.8855	14.193	1.26016	7.36923e-06	0.000123136
AT4G23220	88.0848	78.94	1.11584	1.54544e-10	6.25364e-09
AT4G23270	3.94488	3.52527	1.11903	0.00709852	0.0444796
AT4G23290	1.64556	0.305448	5.38735	0.000395523	0.00411973
AT4G23570	2.89306	2.13441	1.35544	0.000529194	0.0052992
AT4G23600	13.3366	9.90348	1.34666	4.53777e-07	9.89647e-06
AT4G23680	30.8929	27.3249	1.13058	0.00404009	0.0284585
AT4G23850	97.0426	78.5943	1.23473	2.76829e-16	2.235e-14
AT4G24040	12.7714	10.3815	1.23021	4.26515e-05	0.000585169
AT4G24120	8.42637	7.27784	1.15781	0.00300684	0.0224249
AT4G24190	5.47304	3.63775	1.50451	3.44015e-08	9.48612e-07
AT4G24220	7.88633	6.7741	1.16419	0.00059841	0.00581882
AT4G24460	35.2762	31.2286	1.12961	2.86343e-05	0.000412751
AT4G24540	1238.86	1179.77	1.05009	1.44168e-05	0.000223341
AT4G24770	5.46591	2.95396	1.85037	1.15647e-05	0.000183907
AT4G24780	5.26022	4.3943	1.19705	0.00316251	0.0233442
AT4G24800	105.394	101.145	1.04201	0.00612483	0.0397735
AT4G24820	300.181	298.615	1.00524	8.67184e-05	0.00110239
AT4G24930	218.857	115.727	1.89116	4.3559e-34	1.14295e-31
AT4G24960	13.0548	11.0457	1.18188	0.000236601	0.00262433
AT4G25000	20.7124	19.0541	1.08703	0.00292396	0.0219401
AT4G25030	23.5846	20.4727	1.152	0.00119311	0.0103544
AT4G25050	7.49202	4.52533	1.65558	2.61222e-07	6.00096e-06
AT4G25080	47.4357	43.996	1.07818	4.44747e-05	0.000606713
AT4G25100	10.9465	9.4796	1.15474	5.32113e-05	0.00071315
AT4G25110	12.0819	9.00714	1.34136	3.19812e-06	5.78105e-05
AT4G25210	42.1033	38.8185	1.08462	0.000504031	0.00509584
AT4G25480	8.4256	7.35945	1.14487	0.00300166	0.022403
AT4G25500	21.0371	19.405	1.08411	0.00149147	0.0124856
AT4G25630	6.51481	5.82312	1.11878	0.00414591	0.0290514
AT4G25700	50.5943	48.8027	1.03671	0.00618166	0.0400805
AT4G25730	19.9779	15.427	1.29499	1.04635e-10	4.33861e-09
AT4G25900	232.43	218.478	1.06386	5.8947e-05	0.000780675
AT4G25940	35.58	32.1585	1.10639	1.40196e-05	0.000218397
AT4G26080	278.204	246.698	1.12771	3.64948e-13	2.14286e-11
AT4G26090	72.4186	65.0068	1.11402	4.80044e-12	2.44565e-10
AT4G26130	12.2538	9.25661	1.32379	0.00385692	0.0273796
AT4G26190	6.83734	5.48844	1.24577	0.000264762	0.00289651
AT4G26370	4.23178	2.3709	1.78488	7.98127e-08	2.04313e-06
AT4G26510	4.96597	3.19924	1.55224	2.37674e-05	0.000348278
AT4G26530	711.923	663.259	1.07337	0.000105105	0.00130743
AT4G26600	11.8309	9.27449	1.27564	1.61106e-06	3.09549e-05
AT4G26630	10.2949	8.97695	1.14681	0.00502415	0.0339793
AT4G26660	21.5175	18.2207	1.18094	6.76321e-06	0.000114031
AT4G26670	20.4646	17.4736	1.17118	1.48983e-05	0.00022974
AT4G26690	20.2957	18.0455	1.12469	0.000784346	0.00732566
AT4G26700	97.5663	13.864	7.03739	5.87606e-129	9.86767e-126
AT4G26710	21.598	18.4561	1.17024	0.000591981	0.00576632
AT4G26850	33.8967	31.4076	1.07925	0.00294571	0.022064
AT4G26910	8.94155	7.51264	1.1902	0.00624375	0.0404051
AT4G27030	1.78109	0.370919	4.80182	1.42005e-05	0.000220805
AT4G27090	2.95445	2.0213	1.46166	0.00140864	0.011923
AT4G27120	15.4205	13.2363	1.16502	0.0007575	0.00713044
AT4G27280	7.80411	4.52538	1.72452	2.83372e-13	1.69952e-11
AT4G27310	23.9206	19.3625	1.23541	7.44125e-06	0.000124216
[truncated: 760 more rows]

## Sheet: F1CL_additive_peaks
Peak	Enrichment		Ratio	pvalue	padj
	MPV	F1CL
AT1G01020_1	8.19636	8.43452	0.971763	1	1
AT1G01040_1	4.71291	4.88732	0.964313	1	1
AT1G01040_2	3.48718	3.5052	0.99486	1	1
AT1G01050_1	4.92771	5.28523	0.932354	0.679623	1
AT1G01080_1	5.53003	6.07143	0.910828	0.444924	1
AT1G01080_3	5.53908	4.85181	1.14165	0.486772	1
AT1G01090_2	1.98474	1.89323	1.04833	0.694051	1
AT1G01140_1	5.99717	5.86341	1.02281	0.901872	1
AT1G01140_2	1.16956	1.46951	0.795886	0.296911	1
AT1G01160_1	7.86852	7.92541	0.992822	0.920644	1
AT1G01210_1	5.47409	6.60152	0.829217	0.684376	1
AT1G01220_1	8.4684	8.62825	0.981474	1	1
AT1G01230_1	4.4032	4.91585	0.895715	0.703745	1
AT1G01240_1	3.13656	2.52595	1.24174	0.579243	1
AT1G01260_1	1.64452	2.03567	0.80785	0.795523	1
AT1G01260_2	2.07495	2.11341	0.9818	1	1
AT1G01390_1	3.92017	3.51786	1.11436	0.84902	1
AT1G01420_1	2.67412	2.69694	0.991537	1	1
AT1G01430_1	1.94203	1.70017	1.14226	0.59804	1
AT1G01440_1	5.54409	5.15385	1.07572	1	1
AT1G01470_1	3.3206	3.03483	1.09416	0.632153	1
AT1G01490_1	7.83326	8.08156	0.969275	0.740793	1
AT1G01510_1	8.66917	10.9612	0.790897	0.506649	1
AT1G01540_1	5.12736	6.42164	0.798449	0.153443	0.928985
AT1G01610_1	3.17715	3.23304	0.982714	1	1
AT1G01650_1	9.64872	12.6919	0.760226	0.225772	1
AT1G01690_1	1.24819	1.4325	0.871331	1	1
AT1G01710_1	19.1391	21.1978	0.90288	0.69799	1
AT1G01725_1	5.45427	5.09157	1.07124	1	1
AT1G01730_1	3.25596	3.53367	0.921411	0.737621	1
AT1G01780_1	7.49464	9.23642	0.811423	0.613253	1
AT1G01790_1	17.9891	19.6852	0.913838	0.756604	1
AT1G01820_1	8.797	13.9767	0.629405	0.0499304	0.498588
AT1G01830_1	2.74823	3.06174	0.897604	0.721762	1
AT1G01840_1	3.5555	4.69347	0.757543	0.383693	1
AT1G01860_1	3.43922	5.9574	0.577302	0.0946822	0.723473
AT1G01910_1	4.36933	5.02474	0.869562	0.509999	1
AT1G01920_1	8.84779	8.01761	1.10354	0.869266	1
AT1G01930_1	5.32537	4.34084	1.22681	0.307238	1
AT1G01940_1	10.3965	12.2409	0.849323	0.486374	1
AT1G01960_1	10.9655	13.6287	0.804588	0.429879	1
AT1G01970_1	5.18209	6.35545	0.815378	0.56189	1
AT1G01990_1	3.04314	3.02694	1.00535	1	1
AT1G01990_2	4.2994	2.90989	1.47751	0.240101	1
AT1G02020_1	5.45256	7.33423	0.74344	0.49979	1
AT1G02020_2	4.55885	3.93222	1.15936	0.674363	1
AT1G02020_3	2.15748	2.48927	0.866715	1	1
AT1G02090_1	8.63103	9.4945	0.909056	0.510014	1
AT1G02110_1	2.58224	2.24674	1.14933	0.551737	1
AT1G02110_3	2.69352	2.14003	1.25863	0.460993	1
AT1G02110_4	5.83443	7.24475	0.805332	0.515999	1
AT1G02120_1	5.83489	6.24346	0.934559	0.402829	1
AT1G02130_1	8.68438	10.8932	0.797226	0.261718	1
AT1G02140_1	18.2618	20.2559	0.901555	0.498455	1
AT1G02145_1	14.322	16.4243	0.871999	0.736707	1
AT1G02150_1	4.57751	4.85323	0.943189	0.723452	1
AT1G02160_1	5.03305	5.13835	0.979508	0.9117	1
AT1G02170_1	2.25452	2.04732	1.1012	0.734483	1
AT1G02170_2	4.04899	4.54747	0.890383	0.570549	1
AT1G02180_1	4.07125	6.75012	0.603137	0.296905	1
AT1G02260_1	3.13494	3.1568	0.993073	1	1
AT1G02270_1	6.32712	7.7619	0.815151	0.380645	1
AT1G02280_1	9.43648	15.8637	0.594847	0.0747078	0.631646
AT1G02300_1	4.26496	5.37994	0.792751	0.503041	1
AT1G02330_1	5.39199	4.3558	1.23789	0.587236	1
AT1G02330_2	1.83389	1.71296	1.0706	0.828194	1
AT1G02330_3	2.16204	2.39704	0.901964	0.783946	1
AT1G02370_1	5.05016	4.08014	1.23774	0.784634	1
AT1G02410_1	11.5243	13.7412	0.838663	0.56455	1
AT1G02450_1	3.35104	3.03095	1.10561	0.86149	1
AT1G02475_1	5.54666	6.20032	0.894577	0.566754	1
AT1G02475_2	3.40092	2.98461	1.13949	0.431303	1
AT1G02500_1	2.72646	2.69266	1.01255	0.95019	1
AT1G02680_1	7.55093	8.54126	0.884053	0.861806	1
AT1G02720_1	2.15585	2.06427	1.04436	1	1
AT1G02720_2	5.05352	4.85285	1.04135	1	1
AT1G02750_1	3.50725	3.53271	0.992793	1	1
AT1G02840_1	14.6315	17.2196	0.849701	0.375779	1
AT1G02860_1	2.53424	3.2743	0.773978	0.682085	1
AT1G02880_1	6.13415	5.39752	1.13647	0.700292	1
AT1G02910_1	15.2998	8.60584	1.77784	0.00716497	0.127719
AT1G02960_1	8.41277	10.1835	0.82612	0.5384	1
AT1G02990_2	2.79282	1.92081	1.45398	0.617601	1
AT1G03000_1	9.91116	13.628	0.727264	0.345476	1
AT1G03030_1	8.39229	7.53344	1.114	0.869942	1
AT1G03040_1	5.6401	5.95788	0.946662	0.745924	1
AT1G03040_2	2.43865	2.03019	1.20119	0.502432	1
AT1G03055_1	7.60819	5.62016	1.35373	0.628189	1
AT1G03060_2	1.85977	1.77341	1.0487	1	1
AT1G03080_1	4.43871	4.05255	1.09529	0.732958	1
AT1G03090_1	10.3775	11.4474	0.90654	0.852531	1
AT1G03110_1	4.16743	4.13239	1.00848	1	1
AT1G03140_1	5.43186	4.95417	1.09642	0.547022	1
AT1G03150_1	5.102	5.89242	0.865858	0.507281	1
AT1G03210_1	4.65952	5.02611	0.927064	0.867737	1
AT1G03220_1	3.4134	3.38229	1.0092	1	1
AT1G03230_1	3.80933	3.89946	0.976886	1	1
AT1G03250_1	7.45385	8.5378	0.873041	0.589681	1
AT1G03260_1	8.11456	10.5885	0.766359	0.430806	1
AT1G03280_1	11.5066	12.6916	0.906629	0.688362	1
AT1G03290_1	2.45102	2.2727	1.07846	0.608087	1
AT1G03290_2	10.8347	13.0299	0.831525	0.641832	1
AT1G03310_1	2.94923	2.60192	1.13348	0.610526	1
AT1G03330_1	10.0084	13.3182	0.751479	0.0823561	0.669253
AT1G03350_1	3.19016	2.83369	1.1258	0.493855	1
AT1G03365_1	2.247	2.16272	1.03897	1	1
AT1G03365_2	3.05504	2.75622	1.10842	0.719948	1
AT1G03370_1	1.6811	2.17894	0.771523	0.595084	1
AT1G03370_2	2.16956	1.98553	1.09268	0.792649	1
AT1G03370_3	1.92612	1.77514	1.08505	1	1
AT1G03370_4	5.75039	8.37717	0.686436	0.466797	1
AT1G03380_1	8.60253	7.44534	1.15542	0.605334	1
AT1G03400_1	6.86217	7.12664	0.96289	0.821858	1
AT1G03440_1	2.0304	1.8702	1.08566	0.821403	1
AT1G03440_2	2.06334	2.31431	0.89156	0.685771	1
AT1G03470_1	4.83576	3.95355	1.22315	0.617314	1
AT1G03520_1	3.05186	4.20347	0.726033	0.777546	1
AT1G03530_3	3.18563	2.66379	1.1959	0.699439	1
AT1G03530_4	7.5898	7.38735	1.0274	1	1
AT1G03530_2	4.41887	2.30124	1.92021	0.179483	0.988889
AT1G03590_1	3.63827	3.88319	0.936929	0.883668	1
AT1G03610_1	2.18731	2.03942	1.07252	1	1
AT1G03680_1	6.55778	6.45477	1.01596	0.771355	1
AT1G03687_1	6.91556	7.66169	0.902616	0.75138	1
AT1G03730_1	1.85622	2.20146	0.843175	0.711126	1
AT1G03740_1	1.70951	1.68667	1.01354	1	1
AT1G03740_2	5.82099	9.15171	0.636055	0.307281	1
AT1G03760_2	1.73957	2.09789	0.829197	0.799421	1
AT1G03780_1	3.5892	3.63822	0.986525	1	1
AT1G03820_1	4.14607	4.47093	0.927341	0.900314	1
AT1G03860_1	14.5968	15.7341	0.92772	0.747604	1
AT1G03870_1	2.21331	2.09	1.059	0.62047	1
AT1G03910_1	3.94363	3.77566	1.04449	0.793497	1
AT1G03910_2	14.4953	18.4119	0.787277	0.392823	1
AT1G03930_1	9.14086	8.92778	1.02387	1	1
AT1G03950_1	5.5261	6.82303	0.809918	0.334108	1
AT1G03960_1	1.77282	1.99606	0.888159	1	1
AT1G03970_1	3.21065	2.76132	1.16272	0.404571	1
AT1G04020_1	2.88198	2.95451	0.975453	1	1
AT1G04080_1	12.7138	17.8512	0.712209	0.152258	0.926724
AT1G04120_1	8.87829	7.33485	1.21043	0.423185	1
AT1G04140_1	7.55623	8.77366	0.861241	0.352426	1
AT1G04170_1	11.4798	14.575	0.787634	0.18675	1
AT1G04190_1	10.5217	10.9991	0.956596	0.881469	1
AT1G04200_1	5.72705	9.61056	0.595912	0.10939	0.792115
AT1G04270_1	9.82267	12.8738	0.762997	0.00242157	0.0537013
AT1G04280_2	2.48236	2.91771	0.850791	0.61993	1
AT1G04290_1	3.3255	3.77343	0.881293	0.747256	1
AT1G04290_2	3.18399	2.65434	1.19954	0.581944	1
AT1G04300_2	2.89791	2.78409	1.04088	0.896199	1
AT1G04300_1	3.99443	4.36294	0.915536	1	1
AT1G04340_1	9.38542	7.76105	1.2093	0.724457	1
AT1G04350_1	4.73642	4.76006	0.995033	1	1
AT1G04410_1	6.72571	8.00442	0.84025	0.00287701	0.061562
AT1G04430_1	2.60057	2.48677	1.04576	0.79476	1
AT1G04480_1	8.36413	11.344	0.737316	0.00652537	0.118934
AT1G04510_1	18.6196	19.1594	0.971825	0.90824	1
AT1G04520_1	4.76417	3.78611	1.25833	0.525442	1
AT1G04520_2	2.0929	5.23793	0.399566	0.0448603	0.469335
AT1G04530_1	5.46152	6.35936	0.858815	0.509525	1
AT1G04530_2	2.90085	2.90081	1.00001	1	1
AT1G04550_1	2.31551	2.60255	0.88971	0.614878	1
AT1G04550_2	2.19007	3.04983	0.718094	0.439844	1
AT1G04590_1	11.6444	13.716	0.848959	0.508489	1
AT1G04620_1	6.29187	6.35997	0.989293	1	1
AT1G04630_1	6.92587	8.16321	0.848424	0.409579	1
AT1G04660_2	2.37414	2.14171	1.10853	1	1
AT1G04690_1	4.07058	4.62311	0.880485	0.482362	1
AT1G04710_1	10.0125	12.4999	0.801001	0.321018	1
AT1G04750_1	16.6065	19.6177	0.846502	0.253413	1
AT1G04770_1	2.16735	1.73742	1.24746	0.523745	1
AT1G04790_1	11.7032	12.4169	0.942516	1	1
AT1G04810_1	6.99459	8.11341	0.862103	0.596472	1
AT1G04820_1	4.36353	4.13185	1.05607	0.348262	1
AT1G04850_1	13.3116	19.0801	0.697668	0.0608263	0.559905
AT1G04850_2	3.5681	3.56229	1.00163	0.973341	1
AT1G04870_1	6.82466	8.59131	0.794367	0.489221	1
AT1G04910_1	11.254	14.7535	0.762805	0.78952	1
AT1G04940_1	4.53528	5.40527	0.839047	0.311179	1
AT1G04950_1	12.4368	10.8142	1.15004	1	1
AT1G04960_1	7.2064	9.80361	0.735076	0.234895	1
AT1G04970_1	8.71697	19.9494	0.436954	0.0902721	0.705748
AT1G04980_1	3.69271	5.01195	0.736781	0.197518	1
AT1G04985_1	3.18974	2.98323	1.06922	0.630122	1
AT1G05030_1	20.197	14.0301	1.43955	0.527355	1
AT1G05055_2	5.07193	3.86145	1.31348	0.530397	1
AT1G05070_1	8.16555	8.29386	0.984529	1	1
AT1G05120_1	7.4507	9.96265	0.747864	0.318553	1
AT1G05140_1	3.48326	2.70784	1.28636	0.112207	0.802518
AT1G05140_2	4.02523	4.45769	0.902985	0.606051	1
AT1G05170_1	5.2145	5.47018	0.953258	1	1
AT1G05180_1	14.4745	18.0056	0.80389	0.534446	1
AT1G05200_1	5.70251	4.49385	1.26896	0.385787	1
AT1G05205_1	3.95802	4.75435	0.832503	0.445031	1
AT1G05270_1	5.10726	5.14926	0.991844	1	1
AT1G05320_1	3.03424	2.32805	1.30334	0.44219	1
AT1G05350_1	10.8269	12.4591	0.86899	0.537812	1
AT1G05380_1	2.25316	2.23827	1.00665	1	1
AT1G05380_2	2.28991	1.99497	1.14784	0.680726	1
AT1G05380_3	6.62179	5.61256	1.17982	0.630863	1
AT1G05410_1	5.44298	6.78005	0.802793	0.675898	1
AT1G05430_1	3.72976	3.33656	1.11785	0.766304	1
AT1G05460_1	7.00061	7.63394	0.917037	0.80807	1
AT1G05470_1	2.63203	1.92967	1.36398	0.520516	1
AT1G05500_1	19.6238	19.3904	1.01204	1	1
AT1G05520_1	9.95578	11.9428	0.833623	0.621094	1
AT1G05560_1	3.87644	3.72889	1.03957	0.756657	1
AT1G05570_1	7.45341	7.79713	0.955917	1	1
AT1G05590_2	2.20491	2.38381	0.924955	0.879159	1
AT1G05590_1	1.72779	1.92589	0.897135	0.845573	1
AT1G05620_1	2.79107	3.54955	0.786317	0.786958	1
AT1G05630_2	10.897	9.15327	1.1905	0.694489	1
AT1G05710_1	5.1195	5.58627	0.916443	0.840098	1
AT1G05720_1	7.06834	7.20128	0.98154	1	1
AT1G05785_1	7.54203	6.69295	1.12686	1	1
AT1G05790_2	5.22328	4.3733	1.19436	0.743176	1
AT1G05790_1	1.33218	1.58297	0.841568	0.717296	1
AT1G05810_1	2.91326	3.12832	0.931251	1	1
AT1G05830_1	2.96703	3.18498	0.931568	0.861165	1
AT1G05830_2	7.89662	8.6739	0.910388	0.828937	1
AT1G05840_1	8.75539	9.43722	0.927751	0.881089	1
AT1G05850_1	5.23737	5.81708	0.900345	0.0370827	0.415875
AT1G05870_2	2.0824	3.55383	0.58596	0.139716	0.889746
AT1G05890_1	8.35077	10.2801	0.812326	0.451991	1
AT1G05900_1	12.3051	8.27364	1.48727	0.421431	1
AT1G05910_1	7.11999	7.92925	0.897941	0.675191	1
AT1G05940_1	10.1183	11.9324	0.84797	0.544198	1
AT1G05960_1	8.91503	14.4382	0.617461	0.00890288	0.149816
AT1G05970_1	7.24261	7.0673	1.02481	1	1
AT1G06000_1	3.81936	3.30071	1.15713	0.237327	1
AT1G06010_1	9.70839	10.325	0.940278	0.857762	1
AT1G06040_1	4.48823	4.65801	0.963551	0.930719	1
AT1G06060_1	1.65059	1.67736	0.98404	1	1
AT1G06060_2	2.70359	4.78035	0.565564	0.334951	1
AT1G06070_1	5.00027	6.19811	0.806741	0.431996	1
AT1G06110_1	7.08136	7.7118	0.91825	1	1
AT1G06130_1	10.2861	10.4328	0.985942	0.908931	1
AT1G06150_1	13.4393	11.999	1.12003	0.855103	1
AT1G06200_1	12.2783	19.868	0.617994	0.0116379	0.183504
AT1G06210_1	2.9005	2.06486	1.40469	0.22399	1
AT1G06210_2	4.53542	4.25117	1.06686	0.893292	1
AT1G06220_1	12.6528	12.7847	0.989685	1	1
AT1G06230_1	1.64144	1.67978	0.977178	1	1
AT1G06230_2	2.52717	2.20272	1.1473	0.544894	1
AT1G06230_3	7.71165	8.05551	0.957314	0.857312	1
AT1G06240_1	3.63262	2.76237	1.31504	0.230462	1
AT1G06240_2	6.38026	8.31164	0.76763	0.364944	1
AT1G06290_1	5.65507	7.68519	0.73584	0.244999	1
AT1G06390_1	9.62375	9.82289	0.979727	0.925558	1
AT1G06400_2	5.49921	7.65421	0.718456	0.0572598	0.545538
AT1G06400_1	34.3308	32.4902	1.05665	1	1
AT1G06410_1	5.68327	5.33703	1.06488	0.705132	1
AT1G06430_1	6.57197	9.55555	0.687765	0.0307471	0.365032
AT1G06450_1	3.58361	4.13264	0.867147	0.451173	1
AT1G06460_1	2.72994	3.26541	0.83602	0.145218	0.909071
AT1G06470_1	14.0887	17.084	0.824675	0.402631	1
AT1G06500_1	2.52745	2.33605	1.08194	0.88712	1
AT1G06500_2	13.9865	15.4001	0.908205	0.860756	1
AT1G06510_1	4.84964	4.75419	1.02008	1	1
AT1G06515_1	7.72187	9.49852	0.812956	0.347598	1
AT1G06550_1	5.75133	6.58691	0.873145	0.424701	1
AT1G06640_1	4.03513	6.18813	0.652075	0.3535	1
AT1G06645_1	5.83359	3.52005	1.65724	0.235339	1
AT1G06650_1	8.10606	8.56482	0.946437	0.755916	1
AT1G06660_1	16.1727	16.0541	1.00739	1	1
AT1G06670_1	3.63982	4.26163	0.854091	0.663595	1
AT1G06690_1	3.91268	4.46678	0.87595	0.444575	1
AT1G06700_1	11.4293	13.2856	0.860276	0.440314	1
AT1G06720_1	6.57409	5.66516	1.16044	0.542764	1
AT1G06720_2	2.69048	2.5153	1.06965	0.756727	1
AT1G06730_1	2.30419	1.7696	1.3021	0.652482	1
AT1G06730_2	8.49658	9.8372	0.86372	0.649474	1
AT1G06790_1	9.33249	13.712	0.680605	0.275736	1
AT1G06800_1	16.7151	9.2037	1.81613	0.400059	1
AT1G06800_2	1.59194	1.51726	1.04922	1	1
AT1G06850_1	4.32062	3.61283	1.19591	0.638399	1
AT1G06870_1	7.89248	12.1589	0.64911	0.28469	1
AT1G06890_1	4.92933	5.96158	0.826849	0.271625	1
AT1G06900_1	4.33345	4.79724	0.903322	0.743916	1
AT1G06900_2	5.7467	5.57034	1.03166	0.917716	1
AT1G06950_1	9.62174	12.0408	0.799094	0.0895334	0.701788
AT1G06950_2	2.80598	2.07005	1.35551	0.0519268	0.512269
AT1G06960_2	13.7552	16.236	0.847202	0.67176	1
AT1G06960_1	1.63792	1.63893	0.999378	1	1
AT1G07010_1	8.33016	7.46802	1.11544	0.675149	1
AT1G07030_1	4.81226	6.19622	0.776644	0.587029	1
AT1G07040_1	5.04575	5.14215	0.981254	0.889458	1
AT1G07040_2	2.99225	2.39064	1.25165	0.514575	1
AT1G07070_1	6.18218	7.15447	0.864101	0.480437	1
AT1G07080_1	8.47584	8.4782	0.999722	1	1
AT1G07090_1	2.9389	2.33904	1.25646	0.709697	1
AT1G07110_1	7.69717	7.72194	0.996792	1	1
AT1G07140_1	4.88504	4.88566	0.999872	1	1
AT1G07170_1	5.65774	7.3058	0.774418	0.520186	1
AT1G07210_1	10.3022	12.2221	0.842916	0.502762	1
AT1G07220_2	1.95139	1.6074	1.214	0.515723	1
AT1G07220_1	8.62214	6.7006	1.28677	0.564374	1
AT1G07230_1	4.86428	6.19368	0.785362	0.328938	1
AT1G07310_1	2.87873	3.51671	0.818587	0.686892	1
AT1G07310_2	2.73973	2.38609	1.14821	0.598072	1
AT1G07320_1	4.85229	5.64034	0.860283	0.0634899	0.569629
AT1G07350_1	3.25052	3.91547	0.830175	0.35981	1
AT1G07360_1	4.44429	7.26982	0.611334	0.158097	0.941688
AT1G07360_2	2.04222	1.74154	1.17265	0.574699	1
AT1G07420_1	11.0891	15.482	0.716257	0.0941952	0.721116
AT1G07440_1	4.9244	4.53319	1.0863	0.599676	1
AT1G07470_1	10.8377	17.1738	0.631061	0.0800335	0.656491
AT1G07480_1	11.7459	11.2117	1.04764	0.883232	1
AT1G07510_1	2.73224	2.84159	0.96152	0.875344	1
AT1G07530_1	2.85922	2.71903	1.05156	0.896751	1
AT1G07590_1	1.67382	1.54479	1.08353	0.407029	1
AT1G07610_1	2.90793	2.39235	1.21551	0.350612	1
AT1G07615_1	4.30377	4.81696	0.893461	0.859739	1
AT1G07650_1	7.9183	6.45333	1.22701	0.565334	1
AT1G07700_1	9.1971	9.37639	0.980878	1	1
AT1G07705_1	9.19537	12.9767	0.708606	0.374395	1
AT1G07750_1	5.9923	12.4085	0.482921	0.17819	0.987634
AT1G07780_1	4.89083	5.13628	0.952213	1	1
AT1G07790_1	2.08654	2.20956	0.944324	0.628731	1
AT1G07810_1	6.52648	7.99826	0.815988	0.7032	1
AT1G07830_1	4.25513	4.94715	0.860118	0.688269	1
AT1G07840_1	2.98434	3.02635	0.986116	1	1
AT1G07840_2	7.87046	8.59894	0.915283	0.792947	1
AT1G07930_1	3.02184	2.91162	1.03786	0.689892	1
AT1G07940_1	6.48262	7.89952	0.820635	0.0207733	0.281226
AT1G07950_1	3.17086	2.57262	1.23254	0.604497	1
AT1G07960_1	9.23461	11.2558	0.820429	0.325611	1
AT1G07980_2	2.76175	1.90952	1.44631	0.123064	0.838618
AT1G07990_1	2.18825	2.12295	1.03076	0.92048	1
AT1G07990_2	9.58196	10.8463	0.88343	0.576902	1
AT1G08000_1	2.83248	2.3201	1.22084	0.586327	1
AT1G08010_1	3.0449	2.55494	1.19177	0.622861	1
AT1G08030_1	5.09563	13.1567	0.387303	0.0119233	0.186553
AT1G08030_2	2.68602	2.48067	1.08278	1	1
AT1G08060_3	2.64258	2.55714	1.03341	1	1
AT1G08110_1	11.5253	11.0388	1.04408	0.828167	1
AT1G08125_1	5.98032	5.91852	1.01044	1	1
AT1G08130_1	9.72163	10.6588	0.912075	0.881645	1
AT1G08130_2	1.44687	1.62181	0.892132	0.827685	1
AT1G08160_1	2.02237	1.57667	1.28268	0.684297	1
AT1G08180_1	2.36946	2.21395	1.07024	1	1
AT1G08190_1	4.13869	3.76175	1.1002	0.536003	1
AT1G08190_2	10.3218	11.3851	0.90661	0.627923	1
AT1G08200_1	8.88252	7.8514	1.13133	0.218982	1
AT1G08210_1	3.05753	3.74791	0.815795	0.680514	1
AT1G08370_1	2.61009	2.45918	1.06137	0.899959	1
AT1G08370_2	4.4278	7.08891	0.624609	0.0415057	0.445353
AT1G08410_1	2.03054	1.55959	1.30197	0.652571	1
AT1G08420_1	3.09263	3.65707	0.845657	0.28035	1
AT1G08450_1	4.00879	4.35104	0.921341	0.18897	1
AT1G08460_1	2.90953	6.24914	0.465589	0.0132811	0.203347
AT1G08465_1	5.78241	5.81944	0.993637	1	1
AT1G08470_1	2.9564	3.62284	0.816046	0.402628	1
AT1G08470_2	2.11311	1.72384	1.22582	0.591219	1
AT1G08480_1	8.75658	9.33036	0.938504	0.648987	1
AT1G08490_1	9.72236	9.12054	1.06598	0.737425	1
AT1G08510_1	4.51635	5.0817	0.888749	0.230264	1
AT1G08530_1	6.88632	5.87843	1.17146	0.492423	1
AT1G08540_1	11.1189	11.4692	0.969458	0.766998	1
AT1G08550_1	6.31083	6.15395	1.02549	0.730711	1
AT1G08560_1	1.93532	1.96119	0.986806	1	1
AT1G08580_1	4.04052	3.84847	1.0499	0.680857	1
AT1G08580_2	2.16495	2.89752	0.747175	0.152481	0.926724
AT1G08600_1	8.39962	5.75244	1.46018	0.419799	1
AT1G08640_1	10.3874	12.9939	0.799407	0.0460542	0.478122
AT1G08650_1	2.7264	2.24069	1.21677	0.310346	1
AT1G08660_1	3.35571	3.96324	0.846709	0.421541	1
AT1G08660_2	2.59422	1.84852	1.40341	0.317435	1
AT1G08680_1	9.03974	11.404	0.792684	0.53053	1
AT1G08710_1	1.98634	1.63983	1.21131	0.680722	1
AT1G08750_1	6.30927	8.11468	0.777513	0.680137	1
AT1G08780_1	3.19037	3.23342	0.986687	1	1
AT1G08800_2	2.19847	1.8659	1.17824	0.729909	1
AT1G08820_1	10.7649	15.2549	0.705667	0.160094	0.94433
AT1G08830_1	10.5757	11.2672	0.93862	0.426864	1
AT1G08900_1	6.98478	6.90813	1.0111	1	1
AT1G08910_1	2.99139	3.36429	0.889158	0.850205	1
AT1G08930_1	4.67231	8.75015	0.533969	0.0407616	0.441657
AT1G08940_1	3.10013	3.88002	0.798997	0.643849	1
AT1G08960_1	2.87395	2.13339	1.34713	0.47157	1
AT1G08970_1	3.26915	2.53918	1.28748	0.409957	1
AT1G08970_2	6.20522	7.15203	0.867617	1	1
AT1G08970_3	11.0016	12.3951	0.887575	0.869541	1
AT1G09020_1	6.62455	9.83051	0.673876	0.209837	1
AT1G09020_2	2.53831	2.24951	1.12839	0.691682	1
AT1G09060_1	8.53413	5.98059	1.42697	0.40683	1
AT1G09100_1	9.28974	10.1517	0.915093	0.850154	1
AT1G09130_1	11.122	13.3592	0.832532	0.154887	0.933477
AT1G09140_1	13.855	18.671	0.742056	0.315759	1
AT1G09150_1	9.80701	11.4734	0.854762	0.39966	1
AT1G09160_1	7.58233	6.64002	1.14191	0.646286	1
AT1G09190_2	2.44604	1.59617	1.53245	0.450419	1
AT1G09230_2	3.12818	2.49625	1.25315	0.600089	1
AT1G09270_1	3.84989	2.91832	1.31922	0.0928473	0.716229
AT1G09280_1	6.94558	8.22303	0.84465	0.817441	1
AT1G09290_1	7.6646	11.239	0.681964	0.408669	1
AT1G09290_2	3.09134	3.49195	0.885275	0.846516	1
AT1G09300_1	4.09526	3.9399	1.03943	1	1
AT1G09310_1	3.0278	3.01675	1.00366	0.933564	1
AT1G09320_2	1.77011	2.2001	0.804559	0.816131	1
AT1G09330_1	6.06885	7.08037	0.857137	0.442668	1
AT1G09415_1	4.97706	4.18797	1.18842	0.339707	1
AT1G09420_1	4.87944	7.66713	0.636411	0.164987	0.961371
AT1G09430_1	10.9029	11.761	0.927035	0.761205	1
AT1G09470_3	2.03725	2.27552	0.895286	1	1
AT1G09470_2	1.50622	1.40262	1.07386	1	1
AT1G09490_1	5.18193	5.32628	0.9729	1	1
AT1G09530_1	5.57372	6.34393	0.878591	0.821243	1
AT1G09570_1	6.16174	8.84554	0.696593	0.411422	1
AT1G09590_1	3.64294	3.99156	0.912661	0.156598	0.938741
AT1G09620_1	4.33909	4.36553	0.993944	1	1
AT1G09630_1	5.14698	5.31238	0.968866	1	1
AT1G09640_1	5.06853	5.89579	0.859686	0.254433	1
AT1G09645_1	5.84482	6.13197	0.953171	1	1
AT1G09660_1	9.24017	11.8211	0.781667	0.247209	1
AT1G09690_1	4.45368	5.33533	0.834751	0.0209231	0.282083
AT1G09700_1	4.7199	4.34554	1.08615	0.78794	1
AT1G09730_1	4.8025	4.4667	1.07518	0.803176	1
AT1G09740_1	13.1877	14.7034	0.896916	1	1
AT1G09750_1	3.58355	3.16011	1.134	0.0669253	0.587021
AT1G09750_2	2.42309	2.09709	1.15545	0.0541521	0.524553
AT1G09760_1	12.6898	15.8096	0.802665	0.312174	1
AT1G09770_1	3.16495	2.31406	1.36771	0.0639763	0.572303
AT1G09770_3	6.24082	5.49297	1.13615	0.16178	0.949208
AT1G09770_4	2.33809	2.49117	0.938553	0.687589	1
AT1G09770_2	2.2824	1.82267	1.25223	0.269481	1
AT1G09794_1	2.54517	2.87237	0.886087	1	1
AT1G09794_2	6.29821	8.25699	0.762773	0.640788	1
AT1G09795_1	11.8288	11.6981	1.01117	1	1
AT1G09810_1	4.34776	4.48273	0.969891	1	1
AT1G09830_1	5.88151	5.34237	1.10092	0.736236	1
AT1G09830_2	3.05833	2.2938	1.3333	0.273005	1
AT1G09840_1	5.42066	7.21737	0.751057	0.138093	0.887238
AT1G09850_1	8.00488	7.72231	1.03659	0.916433	1
AT1G09870_1	6.04985	8.79493	0.687879	0.24871	1
AT1G09920_1	5.43021	5.88346	0.922963	0.572304	1
AT1G09940_1	4.67771	4.55755	1.02636	1	1
AT1G09940_2	1.55879	1.80713	0.862579	0.671151	1
AT1G09970_1	3.59807	3.04665	1.18099	0.59014	1
AT1G09970_2	5.00646	3.96817	1.26166	0.0772881	0.645421
AT1G09970_3	1.31408	1.23285	1.06589	0.838226	1
AT1G09980_1	10.0712	11.1366	0.904329	0.739293	1
AT1G10060_1	1.71309	1.67687	1.0216	1	1
AT1G10090_1	10.4572	11.2359	0.930692	0.895388	1
AT1G10120_1	2.43597	4.49042	0.542481	0.0761369	0.639224
AT1G10120_2	2.9336	2.40443	1.22008	0.516941	1
AT1G10130_1	17.6494	18.0611	0.977205	1	1
AT1G10140_1	2.80897	2.0267	1.38598	0.589001	1
AT1G10170_1	2.44422	3.45792	0.706848	0.310961	1
AT1G10170_2	2.15134	2.2904	0.939288	0.894836	1
AT1G10270_1	2.84592	2.9095	0.978146	1	1
AT1G10290_1	11.7223	16.7263	0.70083	0.0832774	0.671701
AT1G10310_1	12.5574	12.8287	0.978855	0.909916	1
AT1G10320_2	12.2569	11.8783	1.03188	1	1
AT1G10350_1	3.01373	2.94761	1.02243	1	1
AT1G10360_1	3.8503	3.51946	1.094	0.683825	1
AT1G10390_1	3.53993	3.86068	0.91692	0.478976	1
AT1G10410_1	7.79922	12.9211	0.603603	0.161002	0.946942
AT1G10430_1	5.63123	6.63058	0.849282	0.514343	1
AT1G10450_1	1.72874	1.8613	0.92878	1	1
AT1G10470_1	3.83696	4.64925	0.825286	0.238143	1
AT1G10490_1	9.82985	9.25204	1.06245	0.798421	1
AT1G10510_1	11.4148	12.2134	0.934609	0.83249	1
AT1G10522_1	7.5031	8.99165	0.834453	0.202302	1
AT1G10580_1	8.03085	14.8096	0.542272	0.0139993	0.212207
AT1G10580_2	6.63069	5.75872	1.15142	0.348386	1
AT1G10590_1	6.74768	7.68271	0.878295	0.456962	1
AT1G10600_1	6.64092	9.65048	0.688143	0.150309	0.924888
AT1G10630_1	8.42876	10.1465	0.830709	0.222081	1
AT1G10660_1	5.20586	4.57552	1.13776	0.75733	1
AT1G10670_1	7.66036	8.47167	0.904233	0.281026	1
AT1G10700_1	6.47418	7.28821	0.888309	0.848582	1
AT1G10720_1	3.10246	3.49373	0.88801	0.762558	1
AT1G10720_2	4.18887	4.24374	0.987069	1	1
AT1G10740_1	8.73276	9.79076	0.891939	0.691839	1
AT1G10820_1	4.65403	5.57839	0.834297	0.635397	1
AT1G10830_1	6.96834	6.28955	1.10792	0.868907	1
AT1G10830_2	3.12491	2.52523	1.23748	0.327743	1
AT1G10840_1	7.9735	7.94441	1.00366	1	1
AT1G10850_1	2.83196	3.37477	0.839154	0.479304	1
AT1G10850_2	8.20157	11.2096	0.731655	0.426124	1
AT1G10865_1	5.34608	6.01774	0.888387	0.774309	1
AT1G10870_1	12.5304	14.0537	0.891609	0.7038	1
AT1G10890_1	7.83032	6.3016	1.24259	0.0302245	0.362168
AT1G10910_1	6.76453	16.7736	0.403283	0.0226455	0.296342
AT1G10930_1	3.37191	4.38349	0.769229	0.320725	1
AT1G10940_1	8.42859	10.3721	0.812624	0.11926	0.825626
AT1G10950_1	2.29675	1.76764	1.29933	0.0304587	0.363382
AT1G10950_2	5.64097	5.78376	0.975313	0.935128	1
AT1G11020_1	5.01008	4.47928	1.1185	0.824805	1
AT1G11050_2	3.37505	2.57907	1.30863	0.791347	1
AT1G11130_1	2.26218	2.04178	1.10794	0.852549	1
AT1G11180_1	3.40156	5.04103	0.674774	0.287135	1
AT1G11200_1	8.00601	8.05206	0.994281	1	1
AT1G11240_1	4.95229	5.31505	0.931747	0.776733	1
AT1G11240_2	2.86008	2.46078	1.16227	0.257849	1
AT1G11260_1	1.7224	1.9354	0.889948	0.473721	1
AT1G11280_1	3.38888	4.57886	0.740115	0.475698	1
AT1G11303_1	6.90403	10.1864	0.677773	0.480107	1
AT1G11310_1	2.79405	2.8183	0.991396	1	1
AT1G11330_1	6.42941	6.55737	0.980487	1	1
AT1G11360_1	6.85023	8.39154	0.816325	0.582655	1
AT1G11360_2	1.91051	1.57188	1.21543	0.474306	1
AT1G11360_3	1.60249	1.45126	1.1042	0.798268	1
AT1G11380_1	1.84416	1.80645	1.02087	1	1
AT1G11380_2	6.50191	6.3858	1.01818	1	1
AT1G11400_2	13.9033	7.49052	1.85613	0.0717552	0.616922
AT1G11400_1	1.83818	2.43425	0.755131	0.487845	1
AT1G11430_1	6.08395	7.63816	0.79652	0.00550932	0.104001
AT1G11440_1	8.17119	8.0696	1.01259	1	1
AT1G11475_1	14.4715	16.723	0.865362	0.464516	1
AT1G11480_1	8.28431	9.82409	0.843265	0.575801	1
AT1G11480_2	2.36168	2.43159	0.971246	1	1
AT1G11530_1	5.14505	4.97775	1.03361	0.927316	1
AT1G11630_2	1.45476	1.81807	0.800167	0.787081	1
AT1G11720_1	1.71982	1.92358	0.894074	0.712515	1
AT1G11720_2	3.21999	2.75621	1.16827	0.549832	1
AT1G11720_3	9.43211	10.3537	0.910992	0.749088	1
AT1G11750_1	5.69779	5.56406	1.02404	0.898227	1
AT1G11755_1	7.74396	6.96021	1.1126	0.857391	1
AT1G11780_1	8.29207	9.26724	0.894772	0.854094	1
AT1G11790_1	7.91159	10.205	0.775266	0.441118	1
AT1G11850_1	1.7226	1.80184	0.956019	0.698596	1
AT1G11870_1	1.52452	1.67153	0.912048	0.714519	1
AT1G11870_2	6.10882	9.16391	0.666617	0.186962	1
AT1G11890_1	10.1084	12.8925	0.784052	0.223901	1
AT1G11910_1	4.68549	5.38686	0.869799	0.0772998	0.645421
AT1G11960_1	6.28842	6.06135	1.03746	1	1
AT1G11960_2	2.04375	1.95455	1.04564	0.895188	1
AT1G12000_1	9.18321	8.96285	1.02459	0.918684	1
AT1G12050_1	10.1135	10.2136	0.990197	1	1
AT1G12080_1	6.49404	5.51877	1.17672	0.0613808	0.561337
AT1G12110_1	6.00489	5.10401	1.17651	0.614348	1
AT1G12120_1	2.9257	3.1045	0.942406	0.789154	1
AT1G12230_1	9.85425	10.9553	0.899499	0.386368	1
AT1G12244_1	10.453	9.28585	1.12569	1	1
AT1G12250_1	9.25531	9.4755	0.976762	0.828355	1
AT1G12330_1	3.56369	2.94098	1.21174	0.144234	0.906175
AT1G12330_2	1.75188	2.1576	0.811956	0.497094	1
AT1G12360_1	11.8024	16.6005	0.710968	0.21454	1
AT1G12410_1	5.40081	6.96222	0.775731	0.0645722	0.572578
AT1G12430_1	3.61048	6.82739	0.528823	0.00375512	0.0768438
AT1G12430_2	1.96461	1.85981	1.05635	0.831209	1
AT1G12440_1	1.81471	2.34073	0.775275	0.328469	1
AT1G12470_1	7.04067	10.9868	0.64083	0.17265	0.97566
AT1G12480_1	10.8714	14.4212	0.753848	0.604652	1
AT1G12500_1	3.72683	3.41717	1.09062	0.707596	1
AT1G12500_2	2.01652	2.07769	0.970561	0.922371	1
AT1G12520_1	4.38818	4.11919	1.0653	0.43601	1
AT1G12530_1	8.19034	8.4276	0.971847	1	1
AT1G12550_1	1.78095	1.25606	1.41789	0.470791	1
AT1G12550_2	1.79745	1.47289	1.22036	0.817608	1
AT1G12580_1	5.30526	5.83295	0.909533	0.733765	1
AT1G12640_1	7.34422	5.12158	1.43398	0.764611	1
AT1G12650_1	6.14589	5.61721	1.09412	0.501151	1
AT1G12680_1	5.24509	6.74085	0.778105	0.59013	1
AT1G12730_1	9.98864	12.4776	0.800523	0.444754	1
AT1G12750_1	4.59234	7.41431	0.619389	0.267525	1
AT1G12750_2	1.82855	1.71211	1.06801	1	1
AT1G12770_1	4.87181	5.57786	0.873419	0.579316	1
AT1G12780_1	2.35269	2.65511	0.886098	0.498017	1
AT1G12810_1	5.43269	7.08073	0.767251	0.177791	0.987146
AT1G12820_1	1.57458	2.20484	0.714145	0.148347	0.918665
AT1G12840_1	7.4666	7.06216	1.05727	0.84638	1
AT1G12850_1	4.00836	3.58752	1.11731	0.771774	1
AT1G12880_1	3.40928	3.83702	0.888525	0.683467	1
AT1G12930_1	8.30603	11.5777	0.717414	0.303102	1
AT1G12930_2	2.2813	1.5249	1.49604	0.412826	1
AT1G12930_3	3.03095	2.57695	1.17618	0.750228	1
AT1G12970_1	2.24943	2.3068	0.975128	1	1
AT1G12990_1	3.39204	4.24161	0.799706	0.610159	1
AT1G13000_1	5.00904	9.51956	0.526183	0.00753598	0.132297
AT1G13030_2	2.75397	2.74433	1.00351	1	1
AT1G13060_1	9.46408	12.5783	0.752414	0.0249729	0.317568
AT1G13120_1	8.72431	10.1937	0.855854	0.842931	1
AT1G13120_2	3.55935	3.37171	1.05565	1	1
AT1G13120_3	2.52222	2.19612	1.14849	0.68652	1
AT1G13160_1	3.33189	2.62266	1.27043	0.422429	1
AT1G13160_2	4.30226	3.9689	1.08399	0.879378	1
AT1G13170_1	3.10923	3.55939	0.873529	0.47013	1
AT1G13170_2	1.62113	1.58496	1.02282	1	1
AT1G13190_1	4.93611	4.60919	1.07093	0.813317	1
AT1G13190_2	2.20217	1.90787	1.15426	0.605859	1
AT1G13220_1	2.78689	3.40305	0.818939	0.625047	1
AT1G13220_3	2.73386	2.82907	0.966345	1	1
AT1G13250_1	3.07796	2.12797	1.44643	0.176318	0.982352
AT1G13250_2	2.01296	1.81334	1.11008	0.859082	1
AT1G13320_1	11.6717	13.6907	0.852524	0.400055	1
AT1G13330_1	4.25784	2.81822	1.51083	0.470852	1
AT1G13350_3	7.50703	8.8324	0.849942	0.36419	1
AT1G13350_1	7.44105	7.56765	0.983271	1	1
AT1G13350_2	2.40117	2.53452	0.947387	0.883883	1
AT1G13380_1	3.84297	4.2305	0.908397	0.776077	1
AT1G13390_1	3.21578	2.70831	1.18737	0.441299	1
AT1G13450_2	1.99165	1.83254	1.08683	0.851785	1
AT1G13450_3	2.19236	1.47571	1.48563	0.385875	1
AT1G13450_1	4.4814	5.25058	0.853505	0.68016	1
AT1G13460_1	4.67665	5.85152	0.79922	0.791264	1
AT1G13460_2	4.84871	4.06444	1.19296	0.818307	1
AT1G13470_1	5.55471	5.20414	1.06736	0.52443	1
AT1G13650_1	2.07737	2.35421	0.882404	0.658474	1
AT1G13690_1	4.92812	4.76065	1.03518	0.928131	1
AT1G13730_1	2.40516	1.93595	1.24237	0.496413	1
AT1G13730_2	4.51964	4.94439	0.914095	0.715761	1
AT1G13740_1	2.85217	2.55252	1.11739	0.857376	1
AT1G13740_2	4.36378	3.17364	1.37501	0.2462	1
AT1G13750_1	5.71611	5.33106	1.07223	1	1
AT1G13770_1	6.20493	4.9882	1.24392	1	1
AT1G13790_1	3.80413	2.64058	1.44064	0.376213	1
AT1G13820_1	8.87871	10.5052	0.845172	0.283224	1
AT1G13860_1	4.70303	5.13979	0.915024	0.802088	1
AT1G13870_1	7.94043	12.0485	0.659041	0.329643	1
AT1G13950_1	6.81832	8.14428	0.837191	0.801231	1
AT1G13960_1	1.70707	2.08921	0.817089	0.666385	1
AT1G13960_2	3.5921	2.65486	1.35303	0.253119	1
AT1G14000_1	8.72294	8.02718	1.08668	0.693932	1
AT1G14010_1	14.2666	14.1939	1.00512	1	1
AT1G14020_1	2.0007	2.08689	0.958699	0.872955	1
AT1G14020_2	9.77884	10.3821	0.941891	0.837122	1
AT1G14030_1	8.17848	8.87448	0.921573	0.660251	1
AT1G14060_1	3.43338	3.71717	0.923654	0.881686	1
AT1G14060_2	2.46962	1.92385	1.28369	0.432738	1
AT1G14170_1	5.25846	3.09424	1.69944	0.314362	1
AT1G14200_1	3.0541	1.97197	1.54875	0.110489	0.795772
AT1G14210_1	1.99425	2.24097	0.889901	0.694063	1
AT1G14210_2	2.54713	2.40285	1.06005	0.88321	1
AT1G14230_1	6.93901	8.73359	0.794519	0.63568	1
AT1G14270_1	14.8769	14.2541	1.04369	0.909242	1
AT1G14290_1	7.23266	8.6207	0.838988	0.566023	1
AT1G14310_1	6.32585	7.32169	0.863987	0.615631	1
AT1G14320_1	4.69774	5.52561	0.850177	0.0191635	0.266337
AT1G14340_1	10.3887	14.6778	0.70778	0.337541	1
AT1G14345_1	4.66878	4.64161	1.00585	0.965732	1
AT1G14350_1	6.13771	5.26136	1.16656	0.534518	1
AT1G14360_1	3.75403	8.62229	0.435386	0.011838	0.185457
AT1G14410_1	4.82902	4.50437	1.07207	0.761822	1
AT1G14440_1	1.84498	1.9704	0.936347	0.874504	1
AT1G14440_2	2.00195	1.63348	1.22557	0.480633	1
AT1G14450_1	6.51984	7.70614	0.846058	0.165032	0.961371
AT1G14460_2	2.84075	3.24035	0.87668	1	1
AT1G14510_1	2.19827	2.15079	1.02208	0.878445	1
AT1G14560_1	4.13649	6.31938	0.654572	0.364744	1
AT1G14580_1	1.81745	2.28311	0.796039	0.52993	1
AT1G14580_2	1.80754	1.98336	0.911353	0.875431	1
AT1G14590_1	6.37349	7.86381	0.810484	0.648841	1
AT1G14610_1	4.44195	4.42324	1.00423	1	1
AT1G14610_2	3.75671	2.91485	1.28882	0.129033	0.85532
AT1G14620_1	12.522	15.1007	0.829233	0.525985	1
AT1G14650_1	3.34738	3.16535	1.05751	0.685955	1
AT1G14650_2	4.73723	8.34202	0.567876	0.00963138	0.160176
AT1G14687_1	4.30834	3.93091	1.09602	1	1
AT1G14690_1	5.899	6.63795	0.888679	0.76982	1
AT1G14690_2	2.86899	2.54744	1.12622	0.619966	1
AT1G14700_1	2.95452	3.84027	0.769351	0.343473	1
AT1G14710_1	6.16937	6.22943	0.990358	0.949452	1
AT1G14710_2	2.65997	2.66716	0.997303	1	1
AT1G14710_3	2.92045	3.29412	0.886565	0.348406	1
AT1G14710_4	3.38475	2.37271	1.42653	0.613855	1
AT1G14720_1	4.14835	7.42213	0.558916	0.002995	0.0636542
AT1G14740_1	5.04262	4.26463	1.18243	0.247885	1
AT1G14810_1	9.87651	11.8448	0.833828	0.247581	1
AT1G14810_2	2.62936	2.16269	1.21578	0.155902	0.937303
AT1G14820_1	6.95832	11.6598	0.596781	0.0172997	0.246557
AT1G14830_1	8.37007	9.18374	0.911401	0.664983	1
AT1G14840_1	4.13598	5.00646	0.826128	0.527256	1
AT1G14840_2	2.15058	1.94873	1.10358	0.679669	1
AT1G14840_3	1.4539	1.44097	1.00897	1	1
AT1G14910_1	6.04149	6.71668	0.899475	0.860204	1
AT1G14980_1	4.47503	4.80259	0.931796	0.482147	1
AT1G14990_1	9.7686	12.0202	0.812682	0.514043	1
AT1G15000_1	2.01587	2.13064	0.946132	1	1
AT1G15000_2	1.65761	1.75349	0.945317	0.901102	1
AT1G15030_1	10.5364	9.24871	1.13923	0.750809	1
AT1G15060_1	4.9647	6.02765	0.823653	0.649489	1
AT1G15060_2	1.95908	2.2451	0.872604	0.730643	1
AT1G15120_1	14.2075	13.9311	1.01984	0.839246	1
AT1G15125_1	2.33082	2.91424	0.799801	0.596195	1
AT1G15125_2	1.45476	2.05749	0.707055	0.644721	1
AT1G15130_1	9.01922	9.98256	0.903498	0.799177	1
AT1G15130_2	3.42448	2.5309	1.35307	0.206873	1
AT1G15140_1	8.18285	9.35776	0.874445	0.236187	1
AT1G15140_2	3.74916	3.08041	1.2171	0.0189349	0.264588
AT1G15180_1	4.56158	5.81623	0.784285	0.494891	1
AT1G15200_1	7.98026	7.33537	1.08792	0.331824	1
AT1G15230_1	4.33252	5.0428	0.85915	0.390914	1
AT1G15240_1	1.80913	2.0343	0.889312	0.856159	1
AT1G15240_2	8.62406	11.3305	0.761134	0.45694	1
AT1G15250_1	2.18179	2.92502	0.745908	0.674945	1
AT1G15260_1	1.9345	1.76406	1.09662	0.538596	1
AT1G15280_1	3.37445	4.13966	0.81515	0.104863	0.774968
AT1G15280_2	10.6899	11.4814	0.93107	0.782213	1
AT1G15290_1	4.53478	4.15777	1.09067	0.58722	1
AT1G15290_2	2.04271	2.06772	0.987907	1	1
AT1G15340_1	7.39137	7.26258	1.01773	0.757451	1
AT1G15370_1	5.72832	9.86725	0.580538	0.0500171	0.498817
AT1G15390_1	10.1386	8.46936	1.19709	0.678584	1
AT1G15410_1	7.82134	6.56616	1.19116	0.846022	1
AT1G15420_1	5.61055	5.56895	1.00747	1	1
AT1G15440_2	2.69273	3.01767	0.892321	0.756728	1
AT1G15440_1	6.2812	6.77138	0.92761	1	1
AT1G15470_1	5.72512	5.9426	0.963403	1	1
AT1G15490_1	6.93928	8.3089	0.835163	1	1
AT1G15500_1	4.01595	4.31005	0.931764	0.577619	1
AT1G15530_1	3.97636	5.15892	0.770775	0.461205	1
AT1G15530_2	3.11247	2.10438	1.47905	0.234424	1
AT1G15550_1	2.02298	1.79044	1.12988	1	1
AT1G15660_1	2.6213	2.8118	0.932251	0.878236	1
AT1G15660_2	5.43398	4.12245	1.31814	0.385751	1
AT1G15690_1	2.58566	2.51933	1.02633	0.685555	1
AT1G15710_1	2.78947	2.27244	1.22752	0.413111	1
AT1G15710_2	2.37402	1.90293	1.24756	0.435743	1
AT1G15730_1	9.6108	9.2825	1.03537	0.855564	1
AT1G15740_1	11.8599	13.7275	0.863954	0.567356	1
AT1G15750_1	5.86203	6.92605	0.846375	0.560432	1
AT1G15810_2	2.64675	2.75404	0.961043	0.918229	1
AT1G15810_1	2.13837	2.12147	1.00796	1	1
AT1G15860_1	5.86155	7.25025	0.808462	0.345761	1
AT1G15880_1	7.92814	8.46111	0.937009	0.732693	1
AT1G15910_1	4.08567	3.73798	1.09301	0.696129	1
AT1G15910_2	5.47952	5.02792	1.08982	0.673276	1
AT1G15930_1	8.71868	8.82001	0.988512	0.898198	1
AT1G15940_1	5.28024	5.10177	1.03498	0.925821	1
AT1G15950_1	4.36008	4.37384	0.996855	1	1
AT1G15960_1	4.15009	4.82495	0.860132	0.335655	1
AT1G15970_1	8.39127	9.84528	0.852314	0.484547	1
AT1G15980_1	5.5675	4.55282	1.22287	0.0480745	0.487241
AT1G16000_1	4.49427	6.36536	0.706051	0.199627	1
AT1G16010_1	5.01513	7.24387	0.692328	0.325585	1
AT1G16020_1	16.9155	16.3619	1.03384	1	1
AT1G16040_1	7.40486	6.79893	1.08912	0.865823	1
AT1G16080_1	7.2068	6.95853	1.03568	0.779048	1
AT1G16170_1	4.22457	3.24173	1.30318	0.40667	1
AT1G16180_1	3.68846	4.92136	0.74948	0.0225636	0.295906
AT1G16190_1	8.79743	10.7523	0.818193	0.560402	1
AT1G16210_2	1.92747	2.02042	0.953995	0.74178	1
AT1G16240_1	9.29561	12.3977	0.749784	0.419415	1
AT1G16270_1	1.94348	2.13494	0.910319	0.862431	1
AT1G16280_1	3.41182	4.79082	0.712158	0.168019	0.969437
AT1G16320_1	2.09024	1.89222	1.10465	0.63876	1
AT1G16340_1	4.77391	5.44404	0.876905	0.850966	1
AT1G16350_1	2.86224	2.89997	0.98699	0.943854	1
AT1G16350_2	4.51813	4.97085	0.908925	0.853583	1
AT1G16410_1	2.23661	1.76795	1.26509	0.0625369	0.56483
AT1G16430_1	1.75743	2.60244	0.6753	0.460061	1
AT1G16460_1	11.6133	14.0384	0.827258	0.3565	1
AT1G16470_1	4.26953	4.6571	0.916778	0.4425	1
AT1G16520_1	6.68564	5.28244	1.26564	0.439889	1
AT1G16560_1	7.79309	5.58517	1.39532	0.104653	0.774825
AT1G16570_1	13.3571	19.332	0.690934	0.411906	1
AT1G16610_1	13.3139	16.6251	0.800833	0.262642	1
AT1G16630_2	2.81166	2.16641	1.29785	0.750228	1
AT1G16680_1	6.69211	6.6857	1.00096	1	1
AT1G16700_1	12.2709	13.0595	0.939611	0.730453	1
AT1G16720_1	5.69702	6.65659	0.855847	0.320462	1
AT1G16740_1	4.98805	4.75238	1.04959	0.749851	1
AT1G16740_2	7.188	7.36821	0.975542	0.900643	1
AT1G16750_1	3.6853	4.57372	0.805757	0.801323	1
AT1G16810_1	5.9368	4.95476	1.1982	0.0167441	0.241564
AT1G16840_1	1.90654	1.66302	1.14643	0.513181	1
AT1G16840_2	2.29702	1.86765	1.2299	0.573506	1
AT1G16850_1	1.55322	1.32914	1.16859	0.652007	1
AT1G16860_1	3.40489	4.26615	0.798117	0.338091	1
AT1G16860_2	1.87158	1.88017	0.995429	1	1
AT1G16860_3	6.84944	7.69217	0.890444	0.766923	1
AT1G16870_1	2.74136	3.63836	0.753459	0.358971	1
AT1G16890_1	10.7729	10.6707	1.00958	0.957511	1
AT1G16900_1	13.4846	15.1924	0.887583	0.648198	1
AT1G16916_1	3.11871	4.0404	0.771881	0.806291	1
AT1G16920_1	4.37049	5.54842	0.787699	0.206493	1
AT1G17050_1	9.13019	8.28453	1.10208	0.872902	1
AT1G17070_1	4.61612	4.2443	1.0876	0.759248	1
AT1G17070_2	2.3202	2.17054	1.06895	1	1
AT1G17080_1	4.33247	6.96633	0.621915	0.0697638	0.605367
AT1G17090_1	1.45399	1.19747	1.21422	1	1
AT1G17110_1	7.90285	9.57846	0.825064	0.362528	1
AT1G17130_1	2.74358	2.45509	1.11751	0.367388	1
AT1G17130_2	4.0213	3.88934	1.03393	0.930984	1
AT1G17140_1	2.91477	2.8644	1.01759	0.914327	1
AT1G17140_2	3.08769	2.84518	1.08524	0.492442	1
AT1G17145_1	5.67613	7.3978	0.767273	0.648811	1
AT1G17210_1	9.32892	9.71143	0.960612	1	1
AT1G17220_1	6.52074	6.70146	0.973032	0.847852	1
AT1G17280_1	7.18028	8.7853	0.817307	0.490483	1
AT1G17290_1	2.88569	2.39602	1.20437	0.294219	1
AT1G17330_1	4.78004	4.24179	1.12689	0.657847	1
AT1G17340_1	6.69477	7.50628	0.891889	0.709905	1
AT1G17350_1	6.25536	8.8277	0.708606	0.394092	1
AT1G17360_2	1.73396	1.12429	1.54228	0.458972	1
AT1G17360_1	1.92556	1.7552	1.09706	1	1
AT1G17360_4	7.44348	8.03141	0.926796	1	1
AT1G17360_3	1.35487	1.6791	0.806902	0.79821	1
AT1G17370_1	4.78717	6.1225	0.781898	0.403779	1
AT1G17420_1	2.11892	2.63878	0.802991	0.71941	1
AT1G17430_1	2.16564	2.25869	0.958806	1	1
AT1G17440_1	3.90288	6.43903	0.606129	0.0665452	0.584953
AT1G17440_2	3.51322	2.76489	1.27065	0.25504	1
AT1G17440_3	4.88597	3.44256	1.41928	0.0704027	0.609172
AT1G17455_1	3.73046	3.30157	1.1299	1	1
AT1G17490_1	2.98285	2.41867	1.23326	0.210716	1
AT1G17490_2	2.69429	1.97502	1.36419	0.41884	1
AT1G17500_1	5.15828	4.45755	1.1572	0.619754	1
AT1G17520_1	4.374	5.34688	0.818046	0.378887	1
AT1G17520_2	2.66817	1.99876	1.33491	0.682306	1
AT1G17550_1	5.93082	6.21851	0.953735	0.922827	1
AT1G17560_1	4.39166	4.97353	0.883007	0.845854	1
AT1G17580_1	11.4506	11.899	0.962312	0.840948	1
AT1G17650_1	6.37803	4.14329	1.53936	0.0599832	0.555805
AT1G17665_2	3.78519	2.7346	1.38418	0.189176	1
AT1G17665_3	3.77419	3.25893	1.15811	0.741959	1
AT1G17665_1	6.74669	7.78791	0.866303	0.787373	1
AT1G17680_1	1.90296	2.19976	0.865075	0.846424	1
AT1G17680_2	2.0733	2.16973	0.955557	0.862819	1
AT1G17690_2	4.09973	3.16556	1.2951	0.233776	1
AT1G17690_1	4.82138	7.834	0.615443	0.367225	1
AT1G17720_1	3.77043	3.98719	0.945636	0.634929	1
AT1G17730_1	10.5068	12.9223	0.813072	0.565573	1
AT1G17760_1	3.97321	3.85974	1.0294	0.882932	1
AT1G17780_1	3.98941	3.54223	1.12624	0.826929	1
AT1G17820_1	5.49161	5.24431	1.04716	0.895034	1
AT1G17840_1	7.61614	8.24744	0.923455	0.652395	1
AT1G17850_1	7.39649	8.06532	0.917074	0.594388	1
AT1G17880_1	4.21404	4.51163	0.934039	0.449053	1
AT1G17970_1	2.85956	2.25731	1.2668	0.532045	1
AT1G17970_2	2.20414	2.66049	0.82847	0.722506	1
AT1G17970_3	3.10833	3.93538	0.789843	0.644456	1
AT1G17980_2	2.47346	2.09477	1.18078	0.675133	1
AT1G17980_1	3.16775	4.98542	0.635404	0.468742	1
AT1G18060_1	11.4868	14.2204	0.807769	0.0698361	0.605562
AT1G18070_1	10.7899	13.6098	0.7928	0.0837572	0.673437
AT1G18080_1	5.59532	7.07528	0.790827	0.00613303	0.112969
AT1G18090_1	6.696	6.0376	1.10905	0.854676	1
AT1G18150_1	7.39795	9.2686	0.798173	0.569083	1
AT1G18160_1	8.39891	9.22062	0.910883	0.841949	1
AT1G18170_2	7.12087	9.33901	0.762486	0.156032	0.937303
AT1G18170_1	2.20965	1.80733	1.2226	0.0462762	0.479199
AT1G18190_2	3.76999	3.21311	1.17331	0.633432	1
AT1G18260_1	7.47757	9.62505	0.776887	0.302814	1
AT1G18265_1	2.72797	2.63575	1.03499	0.904152	1
AT1G18270_1	9.03264	10.4803	0.861867	0.648125	1
AT1G18340_1	7.41821	7.32775	1.01234	1	1
AT1G18360_1	7.00118	7.47381	0.936762	0.882322	1
AT1G18370_1	4.95147	4.63364	1.06859	1	1
AT1G18370_2	1.83162	1.46859	1.2472	0.803337	1
AT1G18400_2	3.04385	2.58644	1.17685	0.545838	1
AT1G18440_1	3.37299	5.93885	0.567953	0.056588	0.542112
AT1G18450_1	6.73563	16.1251	0.41771	0.00275264	0.0598638
AT1G18460_1	3.65366	4.61367	0.791921	0.785642	1
AT1G18470_1	6.03957	8.82069	0.684705	0.140305	0.892099
AT1G18485_1	1.87138	1.68069	1.11346	1	1
AT1G18485_2	3.12926	3.35494	0.932732	1	1
AT1G18490_1	7.46554	7.87283	0.948267	0.868992	1
AT1G18500_1	4.6476	3.5083	1.32474	0.0738958	0.629539
AT1G18500_2	13.7691	17.0572	0.80723	0.300567	1
AT1G18580_1	4.30069	6.28036	0.684783	0.386714	1
AT1G18600_1	1.944	2.00266	0.97071	1	1
AT1G18600_2	8.30052	11.1497	0.744461	0.495643	1
AT1G18620_1	2.55459	2.73955	0.932486	0.896144	1
AT1G18630_1	13.9098	22.4367	0.619956	0.0591939	0.55307
AT1G18640_1	14.0492	18.6436	0.753569	0.179839	0.988889
AT1G18650_1	3.01068	2.89542	1.03981	0.885619	1
AT1G18650_2	1.81651	1.59866	1.13627	0.846607	1
AT1G18660_1	8.93013	10.0753	0.886335	0.602946	1
AT1G18680_1	7.3466	7.94943	0.924166	0.797384	1
AT1G18700_1	5.86113	6.96534	0.84147	0.458247	1
AT1G18710_1	4.95946	4.54772	1.09054	0.835074	1
AT1G18720_1	3.91113	3.40745	1.14782	0.184998	0.998231
AT1G18720_2	2.05492	1.96807	1.04413	0.806155	1
AT1G18730_1	10.3032	9.91446	1.03921	0.687942	1
AT1G18850_1	1.89497	1.97959	0.957251	1	1
AT1G18950_2	3.17691	3.49035	0.910198	1	1
AT1G18950_3	5.00577	4.78351	1.04646	0.912125	1
AT1G18950_4	3.69394	3.24171	1.1395	0.638544	1
AT1G18950_5	8.85118	7.69353	1.15047	0.695982	1
AT1G19100_2	7.55802	7.77985	0.971487	1	1
AT1G19110_1	3.16182	2.81734	1.12227	0.72874	1
AT1G19110_2	4.79118	6.96693	0.687703	0.307354	1
AT1G19120_1	8.96479	9.34147	0.959676	0.918378	1
AT1G19130_1	5.99389	7.78841	0.76959	0.39805	1
AT1G19140_1	9.07044	10.0974	0.898297	0.69674	1
AT1G19170_1	6.71374	5.88757	1.14032	0.822612	1
AT1G19240_1	8.93321	9.38619	0.95174	1	1
AT1G19270_1	2.2468	2.09704	1.07141	1	1
AT1G19300_1	3.00213	2.91714	1.02914	0.92563	1
AT1G19300_2	2.34686	2.19797	1.06774	0.840131	1
AT1G19310_1	4.15734	7.07783	0.587375	0.33659	1
AT1G19330_1	8.28011	7.76599	1.0662	1	1
AT1G19350_1	2.18082	1.81942	1.19864	0.136947	0.882519
AT1G19350_2	1.56484	2.24173	0.698051	0.180408	0.990167
AT1G19350_3	3.41909	4.39291	0.77832	0.56618	1
AT1G19360_1	3.19707	3.8422	0.832094	0.717378	1
AT1G19400_1	10.6178	8.73269	1.21587	0.701688	1
AT1G19430_1	5.68687	6.38347	0.890876	0.753208	1
AT1G19430_2	4.05142	3.9413	1.02794	0.916108	1
AT1G19440_1	2.71695	2.97831	0.912244	0.722361	1
AT1G19485_1	12.1227	9.02232	1.34363	0.491451	1
AT1G19520_1	1.99552	1.90692	1.04646	1	1
AT1G19520_2	2.10977	2.61188	0.807759	0.472083	1
AT1G19520_3	6.64466	4.92289	1.34975	0.560144	1
AT1G19580_1	9.73456	10.3882	0.937079	0.819796	1
AT1G19600_1	5.23369	7.12021	0.735047	0.476103	1
AT1G19650_1	7.71107	8.88096	0.86827	0.825669	1
AT1G19680_1	10.0519	9.74339	1.03166	1	1
AT1G19690_1	5.66855	5.84327	0.9701	1	1
AT1G19700_2	3.16632	2.46076	1.28673	0.536874	1
AT1G19700_3	2.11841	1.9692	1.07577	1	1
AT1G19700_1	5.88143	6.36615	0.923859	1	1
AT1G19710_1	7.82625	8.34451	0.937893	0.780707	1
AT1G19715_1	8.02601	9.40851	0.853059	0.765151	1
AT1G19730_1	5.0463	5.70407	0.884684	0.755711	1
AT1G19740_1	3.67442	3.46449	1.0606	0.551266	1
AT1G19770_1	4.36968	3.68883	1.18457	0.186314	1
AT1G19830_1	2.46147	2.92123	0.842613	1	1
AT1G19860_1	5.63711	6.53285	0.862888	0.711385	1
AT1G19880_1	2.42701	3.22781	0.751908	0.0576168	0.546311
AT1G19910_1	5.6174	6.2754	0.895146	0.442703	1
AT1G19920_1	5.20974	6.28663	0.828701	0.180866	0.99134
AT1G19920_2	3.1707	2.91195	1.08886	0.560374	1
AT1G19950_1	4.06745	3.28762	1.2372	0.269135	1
AT1G19970_1	6.68771	9.95744	0.671629	0.408604	1
AT1G19990_1	2.84162	1.80075	1.57802	0.218272	1
AT1G19990_2	4.35873	2.0983	2.07726	0.00774346	0.134139
AT1G19990_3	7.99338	5.76138	1.38741	0.487135	1
AT1G20010_1	4.29544	4.22655	1.0163	0.886333	1
AT1G20050_1	3.18905	4.25445	0.749581	0.0801745	0.656491
AT1G20090_1	4.0141	5.60581	0.716061	0.0113685	0.180546
AT1G20110_1	3.01142	2.65631	1.13368	0.387618	1
AT1G20200_1	4.64812	4.06885	1.14237	0.446587	1
AT1G20220_1	9.21505	5.19812	1.77277	0.0359443	0.408006
AT1G20220_2	7.91345	7.44705	1.06263	0.353248	1
AT1G20225_1	6.80067	11.0627	0.614738	0.0079505	0.136325
AT1G20260_1	16.8725	20.6169	0.818382	0.048837	0.493936
AT1G20270_1	6.45438	6.70899	0.96205	1	1
AT1G20300_1	4.04457	3.32468	1.21653	0.635372	1
AT1G20330_1	1.70011	1.57242	1.08121	0.43007	1
AT1G20430_1	3.70846	3.12174	1.18795	0.553229	1
AT1G20460_1	10.992	8.90489	1.23438	0.687335	1
AT1G20510_1	7.07327	8.11956	0.87114	0.585363	1
AT1G20510_2	2.00549	2.14785	0.933722	0.723388	1
AT1G20540_1	14.2957	14.1593	1.00963	1	1
AT1G20560_1	9.2575	9.54791	0.969584	0.828524	1
AT1G20575_1	8.68839	9.56752	0.908113	0.855112	1
AT1G20630_1	10.7942	13.7316	0.786085	0.300692	1
AT1G20640_1	1.95797	1.77318	1.10422	0.83333	1
AT1G20640_2	1.73914	1.56347	1.11236	1	1
AT1G20670_2	11.6288	9.72097	1.19626	0.708325	1
AT1G20696_1	2.54296	2.15627	1.17933	0.205693	1
AT1G20696_2	2.73528	3.01154	0.908269	0.0697454	0.605367
AT1G20770_1	9.8268	11.955	0.821979	0.490482	1
AT1G20770_2	1.74686	1.91931	0.910146	0.891662	1
AT1G20780_1	2.83052	2.63006	1.07622	0.898027	1
AT1G20780_2	5.78101	6.39589	0.903863	1	1
AT1G20810_1	10.0877	9.50384	1.06143	0.66157	1
AT1G20816_1	7.911	8.38528	0.943438	0.823082	1
AT1G20830_1	9.86628	11.2283	0.8787	0.689057	1
AT1G20910_1	10.3121	14.7636	0.69848	0.419671	1
AT1G20920_1	15.315	13.4138	1.14173	0.196832	1
AT1G20920_3	10.2117	11.8599	0.861027	0.801585	1
AT1G20950_1	6.26193	6.15243	1.0178	1	1
AT1G20960_1	11.5017	13.6103	0.845073	0.463362	1
AT1G20960_2	3.25984	3.35268	0.972311	0.889003	1
AT1G20960_3	4.30705	4.00347	1.07583	0.662556	1
AT1G20970_2	3.06558	2.64618	1.15849	0.614972	1
AT1G20970_3	8.42909	8.04913	1.0472	0.763035	1
AT1G20970_4	7.52456	6.70621	1.12203	0.716002	1
AT1G20980_1	1.70724	1.68379	1.01393	1	1
AT1G20980_2	6.03944	6.40796	0.942491	0.703	1
AT1G21060_1	6.13492	6.67181	0.919528	1	1
AT1G21065_1	4.7129	6.3698	0.739882	0.011438	0.181292
AT1G21070_1	4.08681	3.96313	1.03121	1	1
AT1G21090_2	2.5678	2.81454	0.912332	1	1
AT1G21090_1	1.38895	1.95556	0.71026	0.504104	1
AT1G21160_1	2.54412	2.3973	1.06124	0.870153	1
AT1G21160_3	8.64902	7.06461	1.22427	0.563619	1
AT1G21160_4	2.49751	1.90133	1.31356	0.598108	1
AT1G21160_2	2.23772	1.81302	1.23425	0.814201	1
AT1G21170_1	4.06597	5.3707	0.757065	0.263324	1
AT1G21190_1	5.79343	6.4807	0.893951	0.719464	1
AT1G21200_1	3.87356	4.51136	0.858625	0.828321	1
AT1G21250_1	4.02449	3.27286	1.22966	0.12829	0.853284
AT1G21310_1	4.77319	4.88363	0.977386	0.781804	1
AT1G21310_2	5.29013	5.05431	1.04666	0.646649	1
AT1G21350_1	4.2083	3.88167	1.08415	0.537961	1
AT1G21370_1	5.90817	4.9922	1.18348	0.806128	1
AT1G21390_1	2.63545	2.1929	1.20181	0.680995	1
AT1G21400_1	6.28203	5.3917	1.16513	0.667483	1
AT1G21450_1	3.42236	2.94338	1.16273	0.716504	1
AT1G21500_1	1.82622	1.98596	0.919564	0.179972	0.988889
AT1G21520_1	3.66926	4.44754	0.825009	0.617999	1
AT1G21560_1	9.39925	8.59538	1.09352	0.879403	1
AT1G21580_1	5.00464	6.31758	0.792176	0.310382	1
AT1G21580_2	2.66552	3.20594	0.831431	0.836271	1
AT1G21590_1	3.82929	3.31729	1.15434	0.569211	1
AT1G21600_1	5.0197	5.03915	0.99614	0.928625	1
AT1G21610_1	1.95593	1.9681	0.993817	1	1
AT1G21610_3	2.97361	7.13856	0.416557	0.0325142	0.380439
AT1G21610_2	1.97096	1.74551	1.12916	0.781408	1
AT1G21640_1	13.0762	16.0138	0.816556	0.406896	1
AT1G21650_1	16.8811	16.4227	1.02791	1	1
AT1G21660_1	9.41518	9.46699	0.994528	1	1
AT1G21690_1	11.8838	12.7292	0.933586	0.879342	1
AT1G21700_1	5.67877	4.839	1.17354	0.705711	1
AT1G21700_2	4.66186	4.30722	1.08234	0.864346	1
AT1G21700_3	3.07814	4.30877	0.71439	0.323061	1
AT1G21720_1	7.99213	9.53212	0.838443	0.258859	1
AT1G21730_1	2.16912	2.05611	1.05496	1	1
AT1G21740_2	2.97323	2.85638	1.04091	1	1
AT1G21760_1	4.18535	4.94026	0.847192	0.417756	1
AT1G21780_1	2.66196	1.9944	1.33472	0.131283	0.863255
AT1G21780_2	6.29529	7.33947	0.85773	0.580165	1
AT1G21790_1	6.99242	6.04546	1.15664	0.824623	1
AT1G21830_1	2.99209	2.16665	1.38098	0.255298	1
AT1G21880_1	2.6968	1.92426	1.40148	0.142101	0.898814
AT1G21880_2	7.14384	7.00086	1.02042	1	1
AT1G21900_1	6.90189	6.82977	1.01056	1	1
AT1G21930_1	10.1414	11.385	0.890771	0.651027	1
AT1G21980_1	2.84009	3.07349	0.924061	0.749073	1
AT1G21980_2	5.12786	5.51944	0.929055	1	1
AT1G22020_1	7.84342	11.465	0.684118	0.384434	1
AT1G22030_1	5.82211	4.95633	1.17468	0.8574	1
AT1G22070_1	5.43187	9.23618	0.588108	0.0581097	0.548052
AT1G22140_1	6.38805	7.41677	0.861298	0.532953	1
AT1G22160_1	2.11821	2.76524	0.766015	0.578896	1
AT1G22180_1	5.28102	3.77008	1.40077	0.594946	1
AT1G22200_1	22.0461	24.2903	0.90761	0.810526	1
AT1G22280_1	3.88153	5.10552	0.760262	0.0328169	0.382508
AT1G22300_1	6.47395	7.07803	0.914655	0.214452	1
AT1G22310_2	1.81929	1.70473	1.0672	1	1
AT1G22330_1	3.38364	3.78659	0.893586	0.498652	1
AT1G22360_1	4.56402	5.00239	0.912369	0.641297	1
AT1G22370_1	3.7125	3.64328	1.019	1	1
AT1G22400_1	5.87795	5.93029	0.991175	1	1
AT1G22410_1	8.15972	8.1582	1.00019	1	1
AT1G22430_1	7.82277	10.0329	0.779712	0.324952	1
AT1G22450_1	6.8346	8.06347	0.847601	0.277854	1
AT1G22510_1	12.5642	11.7688	1.06758	0.830166	1
AT1G22520_1	8.93241	8.62762	1.03533	0.914579	1
AT1G22530_1	2.89047	3.9554	0.730766	0.145681	0.910563
AT1G22530_2	3.38936	2.8001	1.21044	0.0725314	0.621836
AT1G22540_1	5.30756	6.73809	0.787696	0.486888	1
AT1G22590_1	2.40754	2.93418	0.820515	0.159707	0.94374
AT1G22620_1	8.55493	8.68452	0.985078	1	1
AT1G22630_1	1.90581	1.5785	1.20735	0.0232585	0.30126
AT1G22650_1	4.13752	4.47652	0.924273	1	1
AT1G22660_1	9.32203	12.311	0.757212	0.573239	1
AT1G22740_1	8.79495	14.1895	0.619823	0.17986	0.988889
AT1G22750_1	4.89531	6.00899	0.814665	0.339799	1
AT1G22770_1	5.55803	8.49292	0.654431	0.0886837	0.700021
AT1G22780_1	4.54048	5.63811	0.805319	0.0567173	0.542495
AT1G22790_1	3.71999	6.38848	0.582296	0.0435941	0.46183
AT1G22800_1	9.01908	9.037	0.998016	1	1
AT1G22840_1	13.0859	15.2112	0.860284	0.263172	1
AT1G22850_1	2.65957	2.62118	1.01464	0.883788	1
AT1G22850_2	2.8225	2.71464	1.03973	0.762205	1
AT1G22882_1	3.73187	2.90934	1.28272	0.335806	1
AT1G22882_2	3.4139	2.49857	1.36634	0.215351	1
AT1G22882_3	8.53596	6.75568	1.26352	0.239017	1
AT1G22882_4	2.18073	2.45717	0.887496	1	1
AT1G22920_1	8.61794	10.8468	0.794513	0.504562	1
AT1G22930_1	6.955	6.12403	1.13569	0.399613	1
AT1G22930_2	6.54177	6.78713	0.96385	1	1
AT1G22940_1	3.05726	2.96548	1.03095	0.899787	1
AT1G22950_1	7.18653	12.6992	0.565906	0.112879	0.804848
AT1G22970_1	1.75865	2.71098	0.648714	0.331771	1
AT1G23020_1	2.81487	3.29648	0.853903	1	1
AT1G23020_2	3.62955	2.68592	1.35133	0.356861	1
AT1G23080_1	5.07654	5.47915	0.92652	0.601196	1
AT1G23080_2	1.54201	1.44101	1.07009	0.679969	1
AT1G23080_3	2.57382	2.30377	1.11722	0.673901	1
AT1G23180_1	4.96921	4.82293	1.03033	1	1
AT1G23190_1	11.3449	11.7688	0.963981	0.792829	1
AT1G23205_1	3.99117	2.88109	1.3853	0.0600938	0.556405
AT1G23220_1	9.73923	13.6544	0.713267	0.315517	1
AT1G23230_2	7.98138	9.825	0.812354	0.559907	1
AT1G23260_1	4.15514	3.99861	1.03915	0.800598	1
AT1G23280_1	2.74562	2.50429	1.09637	0.355133	1
AT1G23310_1	7.03076	6.81916	1.03103	0.626269	1
AT1G23330_1	7.55078	8.11939	0.929969	0.850849	1
AT1G23360_1	13.3378	12.0143	1.11016	0.707329	1
AT1G23400_1	6.91208	7.25601	0.952601	0.715713	1
AT1G23400_3	3.46043	3.07401	1.12571	0.632736	1
AT1G23400_2	1.73292	1.74419	0.993535	1	1
AT1G23440_1	6.29911	9.69827	0.649509	0.265686	1
AT1G23750_1	7.17618	11.0875	0.647229	0.283149	1
AT1G23780_1	3.73153	3.8832	0.960943	1	1
AT1G23820_1	9.49245	10.6557	0.890835	0.400769	1
AT1G23860_2	9.61779	17.3903	0.553053	0.0253806	0.321073
AT1G23900_1	9.86811	14.2202	0.69395	0.119324	0.825626
AT1G23950_1	7.1774	10.9243	0.657013	0.102603	0.765758
AT1G23960_1	5.42506	9.56033	0.567455	0.00674659	0.121779
AT1G24040_1	7.81406	7.27128	1.07465	0.850188	1
AT1G24050_1	18.4315	20.1804	0.913335	0.593776	1
AT1G24100_1	6.53763	5.83046	1.12129	0.199339	1
AT1G24100_2	2.44397	1.87338	1.30458	0.0894635	0.701788
AT1G24120_1	4.98539	6.50897	0.765926	0.111412	0.799547
AT1G24148_1	1.86297	2.51601	0.740448	0.528812	1
AT1G24150_2	3.4389	2.68412	1.2812	0.602979	1
AT1G24160_1	5.26498	5.61211	0.938146	0.880136	1
AT1G24160_2	3.94038	3.36578	1.17072	0.210364	1
AT1G24160_3	1.39907	1.23819	1.12993	0.690012	1
AT1G24180_1	3.44476	3.5538	0.969317	0.802085	1
AT1G24190_2	1.9839	1.66479	1.19168	0.699873	1
AT1G24190_3	3.4546	3.56371	0.969383	1	1
AT1G24240_1	12.7554	4.78414	2.66619	0.0336448	0.388433
AT1G24267_1	8.22553	14.3074	0.574916	0.0219209	0.291886
AT1G24280_1	9.36357	7.92985	1.1808	1	1
AT1G24300_1	3.84223	3.91388	0.981695	1	1
AT1G24300_2	3.23104	2.493	1.29605	0.792809	1
AT1G24310_1	2.28114	2.27668	1.00196	1	1
AT1G24310_2	8.90576	10.1711	0.875595	0.68559	1
AT1G24340_2	8.43386	9.20538	0.916189	0.765335	1
AT1G24340_1	1.45367	2.12777	0.683188	0.540143	1
AT1G24350_1	3.11167	2.80946	1.10757	0.824579	1
AT1G24350_2	8.27352	8.09923	1.02152	1	1
AT1G24360_1	13.3843	15.7706	0.848688	0.196189	1
AT1G24450_1	5.24997	5.64159	0.930582	1	1
AT1G24490_1	3.19409	3.0104	1.06102	0.89243	1
AT1G24490_2	2.66156	1.89819	1.40216	0.0462624	0.479199
AT1G24490_3	7.78284	7.16286	1.08655	0.68149	1
AT1G24510_1	8.81234	10.9112	0.807639	0.223658	1
AT1G24560_1	3.37784	3.21894	1.04937	0.881736	1
AT1G24560_2	3.53347	2.74162	1.28882	0.170113	0.972289
AT1G24560_3	4.41264	5.37364	0.821165	0.532798	1
AT1G24610_1	4.83579	6.70621	0.721091	0.173617	0.977184
AT1G24706_1	1.71958	1.76499	0.974272	1	1
AT1G24706_2	3.9123	4.36263	0.896776	0.725888	1
AT1G24706_3	3.44141	3.57678	0.962153	1	1
AT1G24706_4	19.3808	20.4719	0.946699	0.891013	1
AT1G24764_1	7.65373	6.41475	1.19315	0.581943	1
AT1G24764_2	2.63957	1.69484	1.55741	0.0609293	0.559905
AT1G25220_1	3.78086	5.43289	0.69592	0.0387757	0.426603
AT1G25250_2	7.20604	6.79551	1.06041	0.911509	1
AT1G25260_1	10.8404	9.35138	1.15924	0.430491	1
AT1G25290_1	6.57957	5.92682	1.11013	0.830837	1
AT1G25350_1	7.52271	9.67068	0.777889	0.300997	1
AT1G25380_1	7.05963	7.80726	0.904239	0.737464	1
AT1G25400_1	2.13233	2.30005	0.927081	1	1
AT1G25420_1	12.0636	12.5874	0.958385	0.885952	1
AT1G25450_1	1.98807	1.78611	1.11307	0.627163	1
AT1G25480_1	1.63187	1.68824	0.966611	1	1
AT1G25490_1	2.86189	5.2624	0.543837	0.0230613	0.299526
AT1G25510_2	2.76556	3.13354	0.882569	1	1
AT1G25520_1	14.5499	9.82071	1.48156	0.365194	1
AT1G25540_2	5.92771	4.15626	1.42621	0.337953	1
AT1G25570_1	3.82424	3.83562	0.997031	1	1
AT1G25570_2	3.24491	3.00557	1.07963	0.888908	1
AT1G25580_2	1.91682	1.45913	1.31368	0.568581	1
AT1G25580_1	10.4215	11.8387	0.88029	1	1
AT1G25580_3	1.18036	1.45652	0.810402	0.805848	1
AT1G25682_1	5.63948	6.66694	0.845887	0.544189	1
AT1G26090_1	6.28492	6.85118	0.917349	0.802291	1
AT1G26100_1	7.80006	8.67668	0.898969	0.677558	1
AT1G26120_1	16.4701	20.3649	0.80875	0.514235	1
AT1G26150_1	10.3583	11.0904	0.933992	0.794027	1
AT1G26150_2	6.89439	5.34156	1.29071	0.0754424	0.635056
AT1G26150_3	5.99596	4.1243	1.45381	0.0975128	0.737687
AT1G26160_1	4.87518	5.96245	0.817647	0.376034	1
AT1G26170_1	7.25986	8.09313	0.89704	0.853121	1
AT1G26180_1	6.98487	6.46322	1.08071	0.791126	1
AT1G26210_1	1.90681	2.03248	0.938166	0.739144	1
AT1G26230_1	5.96315	6.18831	0.963616	0.917214	1
AT1G26260_1	3.55489	2.99296	1.18775	0.659276	1
AT1G26270_1	1.82142	1.88854	0.964458	0.906363	1
AT1G26270_2	2.68963	2.89432	0.929278	0.694836	1
AT1G26300_1	3.38307	7.30584	0.463064	0.00558727	0.104984
AT1G26340_1	5.95539	7.74778	0.768658	0.488926	1
AT1G26370_1	11.8002	16.0148	0.736831	0.649331	1
AT1G26460_1	5.32864	3.79922	1.40256	0.116859	0.818179
AT1G26460_2	7.42271	8.12312	0.913776	0.752159	1
AT1G26520_1	3.69322	3.71828	0.99326	1	1
AT1G26550_1	18.2445	19.1549	0.952474	0.680449	1
AT1G26580_2	1.9601	1.95003	1.00516	1	1
AT1G26580_3	4.89107	4.71271	1.03785	0.916822	1
AT1G26580_1	1.85767	1.76405	1.05307	0.840024	1
AT1G26630_1	3.60931	3.57628	1.00924	0.868723	1
AT1G26640_1	7.17797	7.62289	0.941634	0.82463	1
AT1G26640_2	4.50445	4.19116	1.07475	0.867034	1
AT1G26670_1	7.26415	11.2332	0.646667	0.0372533	0.415875
AT1G26740_1	13.9102	20.8743	0.66638	0.236803	1
AT1G26761_1	3.10865	3.05606	1.01721	1	1
AT1G26800_1	2.23409	1.99381	1.12051	0.825418	1
AT1G26830_1	3.88791	3.75945	1.03417	0.871459	1
AT1G26850_2	2.34763	1.94157	1.20914	0.219603	1
AT1G26880_1	8.24649	9.00072	0.916202	0.349941	1
AT1G26910_1	3.30083	7.88501	0.41862	0.0161859	0.235373
AT1G26920_1	1.79455	1.6644	1.0782	0.74151	1
AT1G26940_1	7.97153	10.4284	0.764403	0.258013	1
AT1G26945_1	2.70007	2.20516	1.22443	0.82185	1
AT1G27000_1	14.7497	18.3635	0.803207	0.150484	0.924888
AT1G27060_1	6.57988	7.46128	0.88187	0.819799	1
AT1G27070_1	13.8164	10.1087	1.36678	0.546431	1
AT1G27100_1	2.67489	3.15514	0.847787	0.46855	1
AT1G27120_1	5.074	3.88292	1.30675	0.207542	1
AT1G27150_1	8.37595	10.2745	0.815214	0.641527	1
AT1G27310_1	9.12091	10.2984	0.885659	0.282414	1
AT1G27320_2	2.19664	2.22058	0.989221	1	1
AT1G27320_3	7.84745	8.25933	0.950131	0.709589	1
AT1G27320_1	2.43443	1.99378	1.22101	0.54721	1
AT1G27330_1	2.94488	3.03726	0.969582	0.925876	1
AT1G27340_1	4.86096	9.83073	0.494466	0.176017	0.982352
AT1G27360_1	5.67364	7.46628	0.759902	0.461059	1
AT1G27385_1	12.0224	12.5301	0.959485	1	1
AT1G27390_1	5.10877	6.50061	0.785892	0.117584	0.818708
AT1G27400_1	5.67255	5.73572	0.988986	0.859875	1
AT1G27430_1	3.95353	6.79521	0.581811	0.0105658	0.171494
AT1G27435_1	3.19086	3.14005	1.01618	1	1
AT1G27450_1	4.96877	5.49654	0.903982	0.0605555	0.558553
AT1G27460_1	5.47689	6.78453	0.807262	0.526255	1
AT1G27480_1	3.75755	3.04338	1.23466	0.106946	0.784638
AT1G27510_1	13.584	17.8257	0.762047	0.329753	1
AT1G27520_1	15.4915	20.1216	0.769892	0.367885	1
AT1G27530_1	15.4217	17.7589	0.868392	0.461641	1
AT1G27580_1	5.88346	7.65766	0.76831	0.0987891	0.744563
AT1G27595_1	3.22979	4.54369	0.710831	0.337158	1
AT1G27600_1	5.13504	6.81686	0.753285	0.438035	1
AT1G27630_1	8.63599	16.691	0.517403	0.0271781	0.334677
AT1G27650_1	3.84825	3.87774	0.992396	1	1
AT1G27680_1	3.56449	3.69066	0.965814	0.860641	1
AT1G27690_1	5.52166	5.48978	1.00581	1	1
AT1G27695_1	8.71431	9.20091	0.947114	0.825166	1
AT1G27700_1	6.24593	7.24632	0.861946	0.428714	1
AT1G27750_1	2.84171	2.84016	1.00054	1	1
AT1G27752_1	7.11355	8.65471	0.821927	0.319786	1
AT1G27760_1	2.70751	2.74227	0.987324	1	1
AT1G27770_1	5.63658	8.06506	0.698889	0.441888	1
AT1G27840_1	5.49753	6.40422	0.858423	0.538824	1
AT1G27850_1	4.97083	4.32182	1.15017	0.541273	1
AT1G27900_1	13.0192	11.5205	1.13009	0.860566	1
AT1G27930_1	1.43204	1.96694	0.728056	0.281154	1
AT1G27930_2	3.00831	2.75677	1.09124	0.690145	1
AT1G27970_1	1.89546	1.70809	1.10969	0.566821	1
AT1G27970_2	3.85097	5.3349	0.721846	0.0633863	0.56954
AT1G27980_1	6.77843	10.6924	0.633948	0.361405	1
AT1G28050_1	4.27202	3.89288	1.09739	0.791739	1
AT1G28050_2	2.22421	2.20321	1.00953	1	1
AT1G28060_1	7.06213	7.71537	0.915333	0.701635	1
AT1G28060_2	8.80669	8.18871	1.07547	0.66939	1
AT1G28090_1	7.71585	9.07394	0.850331	0.505176	1
AT1G28100_1	4.2613	5.07381	0.839863	0.39309	1
AT1G28110_1	4.21055	5.28585	0.796571	0.294047	1
AT1G28140_1	7.70248	9.06289	0.849892	0.134818	0.874589
AT1G28200_1	4.14974	3.46672	1.19702	0.585344	1
AT1G28200_2	2.74454	2.32242	1.18176	0.577559	1
AT1G28250_1	8.21467	10.0408	0.818128	0.636007	1
AT1G28280_2	1.92503	2.25969	0.851899	0.847355	1
AT1G28280_3	2.50994	2.36994	1.05907	0.712759	1
AT1G28290_1	4.57068	4.35154	1.05036	0.693453	1
AT1G28290_2	4.68149	4.0795	1.14757	0.118983	0.825144
AT1G28320_1	4.88479	8.3407	0.585657	0.151728	0.926724
AT1G28330_1	1.46608	2.4376	0.601445	0.0286832	0.349751
AT1G28340_1	9.80846	23.3766	0.419584	0.00990134	0.163547
AT1G28350_1	14.0744	15.1673	0.927942	0.77239	1
AT1G28380_1	2.66987	2.46611	1.08263	1	1
AT1G28380_2	3.64775	4.32621	0.843174	0.7299	1
AT1G28390_1	2.85444	3.42181	0.83419	0.61032	1
AT1G28395_1	7.71194	10.33	0.746559	0.310661	1
AT1G28395_2	1.91878	2.38656	0.803995	0.400052	1
AT1G28400_1	3.97463	3.34875	1.1869	0.122672	0.838432
AT1G28420_1	6.8844	6.935	0.992703	1	1
AT1G28420_2	3.96702	4.40911	0.899734	0.565256	1
AT1G28480_1	3.81715	3.51843	1.0849	1	1
AT1G28490_1	3.77301	4.23371	0.891184	0.387198	1
AT1G28510_1	1.84882	1.48002	1.24919	0.182607	0.991934
AT1G28510_2	14.8392	16.0514	0.924479	0.762166	1
AT1G28520_1	5.03205	4.77931	1.05288	0.789375	1
AT1G28540_1	16.6548	13.8345	1.20386	0.6441	1
AT1G28580_1	4.19543	3.95469	1.06087	0.80605	1
AT1G28610_1	5.5438	8.90725	0.622392	0.028559	0.348586
AT1G28660_1	2.88368	2.52924	1.14013	0.858107	1
AT1G28660_2	1.63417	1.39856	1.16846	0.696061	1
AT1G28670_1	3.00288	2.92201	1.02767	1	1
AT1G28680_1	4.0772	3.21064	1.2699	0.494327	1
AT1G28710_1	7.21573	8.7574	0.823958	0.673058	1
AT1G28710_2	1.49001	1.62237	0.918412	0.810336	1
AT1G28960_2	2.4874	3.16213	0.786622	0.486335	1
AT1G28960_1	3.30257	3.85819	0.855991	0.788624	1
AT1G29030_1	5.51519	7.65324	0.720634	0.457862	1
AT1G29040_1	5.91715	6.90238	0.857262	0.531072	1
AT1G29050_1	3.62383	6.42023	0.564439	0.273279	1
AT1G29060_1	8.92223	9.67111	0.922565	0.862948	1
AT1G29120_1	4.84662	5.89567	0.822064	0.441807	1
AT1G29150_1	9.19948	11.425	0.805203	0.414493	1
AT1G29160_1	3.62471	2.9775	1.21737	0.664927	1
AT1G29170_1	4.14168	5.13237	0.806972	0.706252	1
AT1G29170_2	3.2685	3.53751	0.923956	0.810769	1
AT1G29220_1	6.72798	17.2206	0.390695	0.0261139	0.326611
AT1G29220_2	4.32434	5.2047	0.830854	0.521826	1
AT1G29240_1	10.7418	8.35457	1.28574	0.581612	1
AT1G29240_2	2.62673	2.334	1.12542	1	1
AT1G29260_1	7.63693	8.23795	0.927043	1	1
AT1G29300_1	2.70338	2.25949	1.19646	0.804622	1
AT1G29310_1	10.1767	12.7997	0.795074	0.321254	1
AT1G29320_1	9.61035	11.1075	0.865212	0.541965	1
AT1G29330_1	14.3707	14.8579	0.967213	1	1
AT1G29350_1	9.467	10.8288	0.874243	0.641846	1
AT1G29370_1	9.98943	12.284	0.813209	0.609603	1
AT1G29390_1	10.4272	11.3053	0.922329	0.655575	1
AT1G29395_1	2.06379	2.41788	0.853556	0.281907	1
AT1G29430_1	2.63151	2.5259	1.04181	1	1
AT1G29530_1	3.87091	3.92853	0.985333	1	1
AT1G29530_2	2.71368	1.97874	1.37142	0.0569643	0.543149
AT1G29550_1	5.63799	8.70457	0.647705	0.368154	1
AT1G29690_1	5.79761	6.78196	0.854858	0.745254	1
AT1G29700_1	10.0916	10.7389	0.939722	0.723934	1
AT1G29700_2	2.11632	1.90692	1.10981	0.666514	1
AT1G29720_1	9.09721	8.72465	1.0427	0.87076	1
AT1G29790_1	3.88823	3.92702	0.990122	1	1
AT1G29790_2	6.2743	6.37198	0.98467	1	1
AT1G29810_1	6.19008	6.45019	0.959675	1	1
AT1G29850_1	4.90773	5.91031	0.830368	0.078666	0.651355
AT1G29880_1	9.0192	11.8916	0.758452	0.0859811	0.684527
AT1G29880_2	3.19778	2.39066	1.33762	0.125952	0.849251
AT1G29890_1	11.18	12.3416	0.905879	0.664406	1
AT1G29900_1	2.87248	2.89225	0.993166	1	1
AT1G29900_2	4.46316	5.2762	0.845905	0.372707	1
AT1G29940_1	5.2214	7.06758	0.738782	0.399689	1
AT1G29970_1	5.74508	4.87408	1.1787	0.497426	1
AT1G29970_2	9.02	6.32157	1.42686	0.473126	1
AT1G29980_1	3.2426	3.89928	0.831588	0.600358	1
AT1G29980_2	3.89156	3.28709	1.18389	0.71737	1
AT1G29990_1	5.90247	10.7124	0.550996	0.0107934	0.174026
AT1G30000_1	14.3747	12.6688	1.13466	0.642137	1
AT1G30070_1	5.60244	4.84521	1.15628	0.364138	1
AT1G30110_1	1.95269	2.22267	0.878534	0.834442	1
AT1G30120_1	2.06854	2.05756	1.00534	1	1
AT1G30130_1	2.39071	1.91015	1.25158	0.407948	1
AT1G30200_1	3.23764	2.40661	1.34532	0.225021	1
AT1G30200_2	4.69172	5.71385	0.821114	0.432754	1
AT1G30210_1	8.81059	11.1462	0.790454	0.327066	1
AT1G30210_2	1.73135	1.95132	0.88727	0.675539	1
AT1G30250_1	2.08998	1.74653	1.19665	0.355939	1
AT1G30270_1	12.5157	15.2154	0.822569	0.588233	1
AT1G30280_1	3.32115	3.00747	1.1043	0.576435	1
AT1G30320_1	4.39977	3.26849	1.34612	0.332366	1
AT1G30400_1	11.9753	14.2704	0.839173	0.227721	1
AT1G30410_1	7.3975	7.15616	1.03372	1	1
AT1G30410_2	11.6541	13.9059	0.838068	0.801685	1
AT1G30450_1	7.77905	7.76544	1.00175	1	1
AT1G30460_1	4.97315	5.19214	0.957824	0.903888	1
AT1G30460_2	5.23839	3.72735	1.40539	0.297648	1
AT1G30460_3	1.6051	1.52454	1.05284	1	1
AT1G30470_1	7.12966	6.94473	1.02663	1	1
AT1G30480_1	6.29841	5.04571	1.24827	0.291588	1
AT1G30480_2	6.45003	7.5874	0.850097	0.824084	1
AT1G30490_1	6.20927	5.35146	1.16029	0.766381	1
AT1G30510_1	1.76414	1.81047	0.974412	0.887943	1
AT1G30520_1	5.78903	6.63066	0.87307	0.763154	1
AT1G30530_1	2.56934	1.8994	1.35271	0.115189	0.813688
AT1G30530_2	1.7432	1.58418	1.10038	0.458004	1
AT1G30540_1	4.5022	3.97037	1.13395	0.87514	1
AT1G30580_1	11.2416	15.1005	0.74445	0.0682401	0.595546
AT1G30590_1	10.966	12.1703	0.901048	0.865469	1
AT1G30610_1	3.92087	4.20543	0.932337	0.861831	1
AT1G30610_2	2.11181	2.35834	0.895465	0.760493	1
AT1G30630_1	6.77595	6.63957	1.02054	0.896554	1
AT1G30680_1	9.25763	12.1305	0.763173	0.284043	1
AT1G30690_1	2.88073	2.89208	0.996077	1	1
AT1G30810_1	6.8959	5.89092	1.1706	0.732358	1
AT1G30820_1	3.14511	4.53192	0.693991	0.318297	1
AT1G30825_1	6.94863	7.21734	0.962769	1	1
AT1G30860_3	2.18256	1.5034	1.45175	0.556003	1
AT1G30890_1	7.62632	13.9816	0.545454	0.0497644	0.498341
AT1G30910_1	17.2838	15.1562	1.14037	0.536879	1
AT1G30970_1	6.52954	8.33376	0.783505	0.40947	1
AT1G30970_2	1.77511	1.80702	0.982339	1	1
AT1G30970_3	2.15183	2.38862	0.90087	0.865777	1
AT1G31010_1	5.42141	4.23093	1.28137	0.444972	1
AT1G31020_1	7.08391	7.36126	0.962324	1	1
AT1G31070_1	3.15134	2.79836	1.12614	0.867536	1
AT1G31070_2	5.44938	7.61119	0.715969	0.534333	1
AT1G31120_1	3.82681	4.7353	0.808145	0.704321	1
AT1G31130_1	3.93979	2.85319	1.38084	0.0362435	0.409589
AT1G31150_1	1.53229	2.02322	0.75735	0.654627	1
AT1G31160_1	3.89963	4.34571	0.897352	0.59801	1
AT1G31170_1	5.91094	9.69975	0.60939	0.00280148	0.0607086
AT1G31180_1	3.77783	4.14431	0.91157	0.709356	1
AT1G31190_1	8.51412	6.12615	1.3898	0.0245648	0.314352
AT1G31200_1	5.84197	7.06742	0.826606	0.733838	1
AT1G31220_1	3.5004	3.71498	0.942239	1	1
AT1G31220_2	18.4818	25.1902	0.73369	0.425968	1
AT1G31230_1	6.71811	9.29209	0.722992	0.0929038	0.716229
AT1G31230_2	1.99956	1.48561	1.34595	0.0476381	0.486261
AT1G31300_2	18.4761	21.8254	0.846539	0.746806	1
AT1G31300_1	1.78645	1.5699	1.13794	0.844334	1
AT1G31335_1	1.38089	1.25375	1.10141	0.833299	1
AT1G31340_1	11.0208	16.985	0.648857	0.0300754	0.361036
AT1G31350_1	4.65695	5.12808	0.908127	0.659528	1
AT1G31410_1	8.66497	10.4283	0.830911	0.342994	1
AT1G31420_1	2.06356	1.80041	1.14616	0.339571	1
AT1G31420_2	14.5335	11.7774	1.23401	0.359747	1
AT1G31440_2	3.03535	1.7196	1.76515	0.0503681	0.501494
AT1G31500_1	10.2335	11.0876	0.922967	0.710355	1
AT1G31540_2	2.77624	3.21422	0.863738	0.737845	1
AT1G31540_3	4.02289	2.76484	1.45502	0.419803	1
AT1G31540_1	4.91222	3.0251	1.62382	0.510648	1
AT1G31550_1	1.26552	1.98078	0.638899	0.136895	0.882519
AT1G31600_1	7.80153	8.84234	0.882292	0.736851	1
AT1G31650_1	8.79572	8.88599	0.989841	1	1
AT1G31710_1	2.87221	3.30974	0.867805	0.741101	1
AT1G31710_2	3.71892	4.48525	0.829144	0.610399	1
AT1G31780_1	2.75813	2.06754	1.33401	0.103702	0.771074
AT1G31780_2	5.03996	6.67775	0.754739	0.427051	1
AT1G31800_1	14.7388	15.0997	0.976099	0.893682	1
AT1G31810_1	8.76114	10.0926	0.868076	0.552581	1
AT1G31812_1	4.13783	4.49844	0.919837	0.146783	0.912294
AT1G31830_1	1.96149	1.95149	1.00512	1	1
AT1G31850_1	3.5269	6.33531	0.556706	0.0142127	0.214371
AT1G31860_1	3.03831	6.07112	0.500453	0.0112474	0.179442
AT1G31910_1	11.3006	10.7304	1.05315	0.737576	1
AT1G31910_2	2.594	2.00666	1.29269	0.650345	1
AT1G31930_1	4.55233	4.35092	1.04629	0.909753	1
AT1G31930_2	3.66189	5.43037	0.674335	0.316114	1
AT1G31940_1	5.23692	5.36188	0.976695	0.900652	1
AT1G31970_1	8.64152	6.78048	1.27447	0.0103318	0.168595
AT1G31970_2	10.968	11.1924	0.979954	1	1
AT1G32050_1	14.7997	17.6613	0.837976	0.276883	1
AT1G32060_1	3.79322	3.47435	1.09178	0.0136824	0.208442
AT1G32060_2	4.94031	5.49255	0.899456	0.0117013	0.184027
AT1G32080_1	5.344	5.85638	0.91251	0.168469	0.970227
AT1G32090_1	5.23275	7.98708	0.655152	0.261429	1
AT1G32090_2	2.15316	1.707	1.26137	0.445858	1
AT1G32100_1	4.55405	4.12428	1.1042	1	1
AT1G32130_2	6.48679	6.38103	1.01657	0.903035	1
AT1G32130_1	4.37722	6.41865	0.681954	0.246925	1
AT1G32160_1	7.41686	10.6759	0.694729	0.0791268	0.653495
AT1G32200_1	16.4362	17.4953	0.939466	0.777397	1
AT1G32200_2	5.54408	6.93855	0.799027	0.204258	1
AT1G32210_1	10.168	13.7906	0.737312	0.0574812	0.545937
AT1G32220_1	6.16317	7.95114	0.77513	0.158675	0.942438
AT1G32230_1	6.56418	8.76133	0.749222	0.053894	0.524553
AT1G32260_1	4.62964	5.69052	0.813571	1	1
AT1G32310_1	10.1782	12.2714	0.82942	0.700387	1
AT1G32360_1	2.20979	2.82553	0.78208	0.39222	1
AT1G32360_2	1.84796	1.68951	1.09379	0.784294	1
AT1G32360_3	6.042	6.96853	0.867041	0.734035	1
AT1G32380_1	13.0731	16.9699	0.77037	0.67168	1
AT1G32400_1	7.42713	8.54478	0.869202	0.332587	1
AT1G32410_1	7.28802	9.75153	0.747372	0.227807	1
AT1G32440_1	6.77589	9.6439	0.702609	0.18775	1
AT1G32450_1	2.62724	1.95234	1.34569	0.784008	1
AT1G32460_1	1.77165	1.70111	1.04147	0.902437	1
AT1G32490_1	10.2664	10.5717	0.971114	1	1
AT1G32490_2	4.4884	3.81833	1.17549	0.218521	1
AT1G32500_1	10.5491	12.7954	0.824445	0.224961	1
AT1G32530_2	3.49791	3.1028	1.12734	0.56512	1
AT1G32530_3	2.57264	2.32695	1.10559	0.695955	1
AT1G32530_1	6.14723	5.08846	1.20807	1	1
AT1G32550_1	13.253	14.5479	0.910991	0.307298	1
AT1G32580_1	2.54632	1.88075	1.35389	0.210878	1
AT1G32580_2	6.88642	8.51515	0.808726	0.147185	0.913854
AT1G32700_1	2.26202	2.3	0.983487	1	1
AT1G32700_2	4.61975	4.5942	1.00556	1	1
AT1G32750_1	6.35498	9.72478	0.653483	0.342138	1
AT1G32750_2	5.42599	5.37848	1.00883	1	1
AT1G32750_3	2.11453	2.02679	1.04329	1	1
AT1G32750_4	2.56739	2.52717	1.01591	1	1
AT1G32790_1	11.4739	12.4678	0.920287	0.65567	1
AT1G32810_3	5.65673	5.63355	1.00411	1	1
AT1G32860_1	2.25574	1.91716	1.17661	0.817845	1
AT1G32860_2	3.449	2.62504	1.31389	0.49096	1
AT1G32990_2	4.00321	4.41209	0.907326	0.0471328	0.484766
AT1G33040_1	7.3726	6.88729	1.07046	0.362553	1
AT1G33040_2	4.78553	5.33244	0.897438	0.719772	1
AT1G33050_1	10.486	13.4945	0.777062	0.445493	1
AT1G33060_1	3.93397	3.94929	0.99612	1	1
AT1G33110_1	2.20094	1.95194	1.12756	0.855617	1
AT1G33110_2	9.09113	8.49665	1.06997	1	1
AT1G33120_1	10.6937	11.5587	0.925168	0.277479	1
AT1G33140_1	6.6943	7.11224	0.941237	0.289598	1
AT1G33230_1	10.3703	13.286	0.780543	0.321894	1
AT1G33240_1	3.31759	4.77946	0.694136	0.142279	0.899006
AT1G33240_2	2.84974	2.43547	1.1701	0.317015	1
AT1G33240_3	3.56772	3.21222	1.11067	0.572655	1
AT1G33240_4	3.61303	3.35665	1.07638	0.690681	1
AT1G33240_5	3.50217	3.53977	0.989378	0.92013	1
AT1G33250_1	5.29083	6.50203	0.81372	0.596026	1
AT1G33250_2	2.37864	2.18391	1.08917	0.874501	1
AT1G33265_1	7.15417	11.7333	0.60973	0.0220095	0.292209
AT1G33270_1	10.8721	9.91428	1.09661	0.787022	1
AT1G33290_1	7.00606	9.7583	0.717958	0.018745	0.263348
AT1G33330_1	7.33081	13.5873	0.539533	0.0467148	0.48184
AT1G33360_2	3.68707	4.00621	0.920338	0.804651	1
AT1G33410_1	6.81454	12.5304	0.543841	0.0455145	0.474138
AT1G33420_2	1.47241	1.57499	0.934869	1	1
AT1G33480_1	9.26942	4.62917	2.00239	0.301704	1
AT1G33490_1	8.90118	8.15213	1.09188	0.732917	1
AT1G33520_2	6.68775	6.4842	1.03139	0.783541	1
AT1G33520_1	6.7736	6.52604	1.03794	1	1
AT1G33680_1	2.26863	2.61135	0.868757	0.557366	1
AT1G33680_2	8.5823	11.243	0.763343	0.320371	1
AT1G33810_1	8.92851	12.2304	0.730027	0.0052915	0.101146
AT1G33930_1	3.54895	3.54707	1.00053	1	1
AT1G33970_1	2.87528	2.26237	1.27092	0.161004	0.946942
AT1G33990_1	7.15935	11.0628	0.647155	0.0227632	0.296923
AT1G34000_1	4.56921	4.40852	1.03645	0.774832	1
AT1G34010_1	6.30966	6.49421	0.971582	1	1
AT1G34010_2	1.61067	1.81081	0.889475	0.595616	1
AT1G34020_1	6.50437	14.4962	0.448696	0.0499531	0.498588
AT1G34030_1	6.29972	7.46935	0.843409	0.0849286	0.680528
AT1G34110_2	1.3826	1.71452	0.806407	0.780635	1
AT1G34120_1	1.80883	1.39467	1.29696	0.541483	1
AT1G34130_1	9.40723	10.813	0.869993	0.500877	1
AT1G34150_1	2.84021	2.99683	0.947737	0.871548	1
AT1G34200_1	2.59833	2.68858	0.966431	1	1
AT1G34210_1	10.7438	9.93925	1.08095	0.850024	1
AT1G34220_1	3.75485	4.4022	0.852949	0.736703	1
AT1G34340_1	2.49103	2.42463	1.02739	1	1
AT1G34340_2	5.0821	5.9398	0.855601	0.723144	1
AT1G34350_1	5.98317	6.18993	0.966597	1	1
AT1G34360_1	4.7937	4.64124	1.03285	1	1
AT1G34380_1	2.43195	3.75239	0.648108	0.151286	0.926133
AT1G34470_1	6.89277	9.80971	0.702648	0.295843	1
AT1G34550_1	5.47694	6.07544	0.901488	0.749452	1
AT1G34550_2	2.74605	2.4631	1.11488	0.584258	1
AT1G34550_3	1.824	1.54151	1.18326	0.720336	1
AT1G34570_1	8.69701	7.59025	1.14581	0.837783	1
AT1G34750_1	3.32108	3.45062	0.962459	0.88321	1
AT1G34770_1	3.83481	4.42956	0.865731	0.844014	1
AT1G34780_1	6.90731	8.95841	0.771041	0.662612	1
AT1G35160_1	8.02548	11.1415	0.720325	0.00530684	0.10128
AT1G35220_1	13.952	15.7692	0.884764	0.852178	1
AT1G35340_1	2.22263	1.67473	1.32716	0.13919	0.888823
AT1G35340_2	2.72279	3.60426	0.755438	0.259509	1
AT1G35460_1	3.31617	6.44768	0.51432	0.0618716	0.563004
AT1G35510_1	4.92434	5.6087	0.877984	0.864149	1
AT1G35580_1	7.36513	8.79475	0.837446	0.299492	1
AT1G35680_1	1.68081	1.56092	1.07681	0.188317	1
AT1G35680_2	5.63369	5.93402	0.949388	0.327168	1
AT1G35780_1	3.95254	6.30799	0.626592	0.0923189	0.714399
AT1G36050_1	13.0436	13.429	0.971301	1	1
AT1G36070_3	1.77133	2.09238	0.846562	0.801271	1
AT1G36280_1	2.32238	2.57711	0.901157	0.695822	1
AT1G36310_1	6.85692	6.73578	1.01798	1	1
AT1G36380_1	3.45236	2.21204	1.56071	0.238136	1
AT1G36390_1	5.75834	5.9015	0.975742	0.913392	1
AT1G36390_2	2.8184	2.53818	1.1104	0.426961	1
AT1G36980_1	10.9471	13.206	0.828953	0.127348	0.851482
AT1G36990_1	7.20451	7.13729	1.00942	1	1
AT1G41830_1	4.73421	5.02069	0.942941	0.669043	1
AT1G41880_1	3.81495	4.01503	0.950167	0.698121	1
AT1G41880_2	1.90747	1.69677	1.12418	0.0918574	0.712941
AT1G42430_1	3.18537	2.7822	1.14491	0.228129	1
AT1G42430_2	8.10193	7.73409	1.04756	1	1
AT1G42440_1	11.4721	15.0541	0.76206	0.453041	1
AT1G42480_1	6.73642	5.73995	1.1736	0.24473	1
AT1G42540_1	10.7591	14.2862	0.753113	0.774822	1
AT1G42550_1	1.89208	1.90417	0.99365	1	1
AT1G42550_2	3.1403	2.61885	1.19912	0.158063	0.941688
AT1G42550_3	3.11604	2.91158	1.07022	0.547306	1
AT1G42550_4	7.64745	7.15369	1.06902	0.49826	1
AT1G42960_2	7.09082	7.61034	0.931734	0.584371	1
AT1G42960_1	2.48355	2.23791	1.10976	0.261219	1
AT1G42990_1	2.86497	3.2199	0.889769	0.709993	1
AT1G42990_2	4.16036	4.05343	1.02638	0.826128	1
AT1G43130_1	7.33747	10.4441	0.702549	0.0519072	0.512269
AT1G43190_1	8.29113	10.3377	0.802029	0.278129	1
AT1G43560_1	9.03415	10.0356	0.900212	0.292965	1
AT1G43580_1	3.75725	4.39755	0.854397	0.513695	1
AT1G43620_1	9.0861	14.8798	0.610631	0.144585	0.906175
AT1G43670_1	4.20443	4.43603	0.947791	0.6819	1
AT1G43700_1	2.24944	2.76229	0.81434	0.520199	1
AT1G43700_2	7.82723	9.40236	0.832475	0.451616	1
AT1G43800_1	2.93441	2.23101	1.31529	0.545162	1
AT1G43850_1	2.41118	2.13273	1.13056	0.701232	1
AT1G43850_2	2.35775	2.48375	0.949273	0.903053	1
AT1G43850_3	3.34447	3.53692	0.945587	0.707628	1
AT1G43860_1	2.60392	2.46827	1.05496	1	1
AT1G43860_2	3.61144	4.56412	0.791268	0.159274	0.943615
AT1G43860_3	5.56944	5.53931	1.00544	1	1
AT1G43890_1	10.4747	11.7336	0.892711	0.871729	1
AT1G43900_1	3.10259	2.86002	1.08481	1	1
AT1G43900_2	6.5723	7.69176	0.85446	0.591668	1
AT1G44000_1	6.66118	5.6079	1.18782	0.292971	1
AT1G44170_1	7.55114	13.9017	0.543181	0.0217588	0.290683
AT1G44446_1	4.99625	4.74076	1.05389	0.846832	1
AT1G44750_1	4.30539	5.19415	0.828893	0.464773	1
AT1G44770_1	10.018	13.3248	0.751833	0.44871	1
AT1G44780_1	13.2086	14.9828	0.881582	0.609586	1
AT1G44790_1	14.1564	15.5724	0.909065	0.790504	1
AT1G44810_1	4.10755	4.18179	0.982245	0.937862	1
AT1G44820_1	4.84748	3.76397	1.28787	0.254202	1
AT1G44820_2	7.41395	8.09325	0.916065	0.867637	1
AT1G44835_1	9.65038	11.8391	0.815129	0.419258	1
AT1G44900_1	1.86241	1.66506	1.11852	0.843807	1
AT1G44900_2	5.14695	5.46324	0.942105	1	1
AT1G44910_1	10.2456	10.9729	0.93372	0.623587	1
AT1G44920_1	9.03267	7.55723	1.19524	0.151296	0.926133
AT1G44920_2	4.1597	2.94231	1.41375	0.0316759	0.372782
AT1G44960_1	5.58248	4.54158	1.22919	0.661673	1
AT1G45050_1	10.23	11.8915	0.860279	0.737728	1
AT1G45130_1	5.70697	6.89724	0.827429	0.444459	1
AT1G45145_1	2.67584	3.75168	0.713239	0.428422	1
AT1G45150_1	6.51636	9.95541	0.654555	0.278933	1
AT1G45160_1	7.73201	10.5128	0.735487	0.414755	1
AT1G45170_1	6.75395	7.37802	0.915414	0.739364	1
AT1G45207_1	7.21198	7.41208	0.973004	0.869019	1
AT1G45207_2	1.94443	2.38946	0.813752	0.812726	1
AT1G45230_1	8.00078	7.56365	1.05779	0.642478	1
AT1G45249_1	4.27063	3.89836	1.09549	0.636062	1
AT1G45332_1	11.6629	9.12384	1.27828	0.608594	1
AT1G45688_1	2.68641	2.29625	1.16991	0.336012	1
AT1G45688_2	2.33114	1.97872	1.17811	0.196817	1
AT1G45688_3	2.84877	2.86843	0.993147	1	1
AT1G45976_1	1.58468	1.47888	1.07154	0.874262	1
AT1G45976_2	4.26611	4.58749	0.929946	0.766916	1
AT1G46264_1	2.24766	1.71577	1.31	0.806675	1
AT1G46480_1	4.27548	2.94844	1.45008	0.621155	1
AT1G46480_2	2.40785	2.48509	0.968919	1	1
AT1G47200_2	3.09031	3.54518	0.871695	0.457682	1
AT1G47240_1	7.40332	6.23304	1.18775	0.642404	1
AT1G47250_1	9.77572	10.1535	0.96279	0.906546	1
AT1G47260_1	7.57234	8.23739	0.919264	0.403806	1
AT1G47278_1	8.00762	4.88253	1.64005	0.127402	0.851482
AT1G47290_1	11.2607	18.6264	0.604553	0.126343	0.850942
AT1G47310_1	4.40815	3.83818	1.1485	0.618799	1
AT1G47330_1	1.76831	1.63658	1.08049	0.876133	1
AT1G47330_2	7.82666	7.91481	0.988863	1	1
AT1G47380_1	9.21489	14.3225	0.643384	0.27459	1
AT1G47410_1	9.83949	11.4266	0.861107	0.302604	1
AT1G47490_1	12.7177	15.9437	0.797666	0.290554	1
AT1G47500_1	15.5027	15.3943	1.00705	1	1
AT1G47530_1	7.77743	10.7924	0.720638	0.0763551	0.640171
AT1G47550_1	12.1992	14.8776	0.819974	0.37976	1
AT1G47570_1	4.64503	6.49028	0.71569	0.476965	1
AT1G47640_1	12.7108	12.8043	0.9927	1	1
AT1G47710_1	2.38227	2.11987	1.12378	0.600622	1
AT1G47710_2	15.6306	20.4888	0.762885	0.523139	1
AT1G47740_1	2.10104	2.13038	0.986229	1	1
AT1G47740_2	8.29705	10.2378	0.810431	0.290944	1
AT1G47830_1	9.54871	12.0019	0.795603	0.258758	1
AT1G47870_1	3.49091	3.30031	1.05775	1	1
AT1G47900_1	11.8269	16.3839	0.72186	0.465214	1
AT1G47900_2	4.12332	3.48341	1.1837	0.681226	1
AT1G47970_1	8.07554	7.55341	1.06913	0.221426	1
AT1G48050_1	1.97617	2.60815	0.757693	0.469471	1
AT1G48050_2	11.475	11.4193	1.00488	1	1
AT1G48090_1	14.3555	16.5814	0.865762	0.718125	1
AT1G48110_1	7.67932	10.6822	0.718886	0.125444	0.849124
AT1G48140_1	13.8747	10.7666	1.28868	0.401575	1
AT1G48170_1	7.00171	8.89131	0.787478	0.391307	1
AT1G48175_1	6.91556	8.12551	0.851092	0.66451	1
AT1G48200_1	4.32455	4.43557	0.974972	1	1
AT1G48210_1	7.31349	9.85143	0.742378	0.120621	0.830817
AT1G48230_1	8.29642	9.99059	0.830424	0.306411	1
AT1G48240_1	3.48461	4.05832	0.858633	0.683632	1
AT1G48280_2	5.41079	5.20857	1.03883	1	1
AT1G48310_1	3.46884	2.32544	1.49169	0.201454	1
AT1G48320_1	3.5928	3.82336	0.939698	1	1
AT1G48350_1	5.2619	5.2689	0.998671	1	1
AT1G48370_1	4.11728	3.10423	1.32635	0.411841	1
AT1G48380_2	2.18078	2.88238	0.756591	0.462157	1
AT1G48410_1	8.85275	11.3456	0.780283	0.183984	0.994968
AT1G48420_1	13.6459	14.0288	0.972706	0.866268	1
AT1G48430_1	8.70802	8.70336	1.00053	1	1
AT1G48440_1	9.1317	9.30486	0.98139	1	1
AT1G48450_1	8.38724	9.10148	0.921525	0.526094	1
AT1G48460_2	7.45035	9.37448	0.794748	0.405831	1
AT1G48460_1	1.4755	1.8092	0.815554	0.447664	1
AT1G48520_1	10.5233	10.4243	1.00949	0.901204	1
AT1G48550_1	3.71438	8.02718	0.462726	0.0523182	0.515423
AT1G48570_1	6.29072	8.25682	0.761882	0.168161	0.969797
AT1G48600_1	5.67151	6.20859	0.913494	0.239756	1
AT1G48610_1	8.6638	8.80671	0.983772	1	1
AT1G48620_2	5.06156	4.26704	1.1862	0.359926	1
AT1G48635_1	8.03498	8.7492	0.918367	1	1
AT1G48760_1	4.94114	4.41148	1.12006	0.749355	1
AT1G48770_1	2.90963	3.06231	0.950143	1	1
AT1G48790_1	9.3914	10.279	0.913649	0.765597	1
AT1G48830_1	6.41353	7.39236	0.867589	0.22074	1
AT1G48850_1	12.0513	9.63189	1.25119	0.307525	1
AT1G48850_2	3.57786	2.51591	1.42209	0.20382	1
AT1G48860_1	9.62695	10.5327	0.914003	0.61546	1
AT1G48860_2	2.93055	2.38413	1.22919	0.617807	1
AT1G48900_1	10.2471	9.52988	1.07526	0.800777	1
AT1G48900_2	2.37681	2.24473	1.05884	0.696566	1
AT1G48950_1	1.84842	2.11782	0.872796	0.838128	1
AT1G48950_2	16.3359	14.3329	1.13975	0.854394	1
AT1G48970_3	1.5292	1.70244	0.89824	0.800932	1
AT1G48970_2	1.74335	2.20332	0.791239	0.521302	1
AT1G48970_1	7.686	7.45764	1.03062	1	1
AT1G49010_1	6.98919	6.00645	1.16361	0.471291	1
AT1G49050_1	3.20869	2.26619	1.4159	0.30694	1
AT1G49050_2	8.9628	11.5644	0.775035	0.656788	1
AT1G49130_1	3.13544	2.50167	1.25334	0.48303	1
AT1G49130_2	2.06737	2.06826	0.99957	1	1
AT1G49140_1	3.49403	4.36281	0.800867	0.108102	0.789309
AT1G49140_2	1.92504	1.94219	0.99117	1	1
AT1G49240_1	5.53555	5.23544	1.05732	0.675339	1
AT1G49300_1	12.6499	15.1047	0.837477	0.362154	1
AT1G49340_1	14.4972	16.4657	0.88045	0.595285	1
AT1G49350_1	5.39379	5.8574	0.92085	0.855966	1
AT1G49380_1	13.8552	13.5318	1.0239	0.876558	1
AT1G49400_1	9.09123	11.0747	0.820899	0.546479	1
AT1G49410_1	13.7123	15.7762	0.869175	0.446234	1
AT1G49430_1	5.76219	6.42578	0.896731	0.735167	1
AT1G49470_1	1.98902	1.61809	1.22924	0.5956	1
AT1G49480_1	10.5595	8.41046	1.25553	0.347008	1
AT1G49510_1	3.61251	6.49364	0.556315	0.006735	0.121779
AT1G49520_1	4.74266	4.71828	1.00517	1	1
AT1G49560_1	6.79608	9.75305	0.696815	0.43292	1
AT1G49580_1	1.9938	2.68155	0.743525	0.636741	1
AT1G49580_3	7.63423	8.8074	0.866797	0.664331	1
AT1G49580_2	1.68497	1.74494	0.965633	1	1
AT1G49590_1	4.93216	6.14837	0.802191	0.438811	1
AT1G49600_1	11.9918	15.0547	0.796548	0.115177	0.813688
AT1G49600_2	3.45945	2.83703	1.21939	0.0774241	0.645629
AT1G49620_1	2.83927	2.77691	1.02246	1	1
AT1G49650_1	1.79413	1.90484	0.94188	0.826077	1
AT1G49650_2	3.1768	2.26094	1.40508	0.241258	1
AT1G49670_1	7.50088	8.36505	0.896693	0.607049	1
AT1G49710_1	5.44445	6.46041	0.842741	0.527084	1
AT1G49720_1	9.04837	10.1625	0.890368	0.574569	1
AT1G49730_1	4.9652	7.77924	0.638262	0.2317	1
AT1G49740_1	6.80359	4.89528	1.38983	0.45262	1
AT1G49760_1	5.48595	7.70582	0.711923	0.0696386	0.605144
AT1G49820_1	4.72503	10.6666	0.442976	0.0123978	0.191512
AT1G49850_1	2.37029	4.23653	0.559488	0.144606	0.906175
AT1G49880_1	6.11861	5.59162	1.09424	1	1
AT1G49890_1	2.53779	3.25363	0.779988	0.464695	1
AT1G49950_1	3.62856	5.26085	0.689729	0.0174711	0.248417
AT1G49975_1	3.64756	4.06927	0.896367	0.442512	1
AT1G50000_1	9.5442	10.3669	0.920644	0.836446	1
AT1G50010_1	3.90336	4.66116	0.837422	0.00828008	0.141201
AT1G50120_1	2.34782	1.77624	1.32179	0.339764	1
AT1G50120_2	7.3542	9.48733	0.775161	0.571731	1
AT1G50170_1	6.64222	5.73422	1.15835	0.56288	1
AT1G50200_1	5.40071	7.2816	0.741692	0.0165209	0.238816
AT1G50240_1	4.16257	4.67358	0.890661	0.333729	1
AT1G50300_1	4.94743	4.96818	0.995824	1	1
AT1G50320_1	7.39094	8.07247	0.915574	0.37726	1
AT1G50360_1	4.59079	5.68848	0.807033	0.42051	1
AT1G50370_1	9.75754	11.0581	0.882391	0.855139	1
AT1G50410_1	11.8395	16.0215	0.738975	0.783124	1
AT1G50430_1	16.947	12.7911	1.3249	0.0349005	0.399259
AT1G50440_1	7.36628	7.49349	0.983023	0.93602	1
AT1G50450_1	4.29646	4.92654	0.872105	0.346234	1
AT1G50460_2	2.82319	2.58422	1.09247	0.639706	1
AT1G50460_3	2.63283	2.36587	1.11284	1	1
AT1G50460_1	1.50449	2.01187	0.74781	0.489578	1
AT1G50500_1	12.1225	9.97217	1.21564	0.732903	1
AT1G50510_1	3.08256	4.09825	0.752165	0.369388	1
AT1G50575_1	8.0757	9.54138	0.846387	0.487754	1
AT1G50600_1	3.8623	2.94865	1.30985	0.581583	1
AT1G50600_2	1.88241	2.13513	0.881636	0.87105	1
AT1G50620_1	3.99651	4.52409	0.883385	0.630555	1
AT1G50660_1	2.99465	2.82671	1.05941	0.80005	1
AT1G50660_3	6.36421	7.865	0.809181	0.59021	1
AT1G50660_2	1.6834	1.70437	0.987696	1	1
AT1G50670_1	7.49574	8.93987	0.838461	0.303563	1
AT1G50730_1	11.2223	12.3769	0.906714	1	1
AT1G50732_1	2.35193	2.06035	1.14152	0.846691	1
AT1G50740_1	3.12667	3.74188	0.83559	0.611972	1
AT1G50840_1	1.92498	1.7624	1.09224	0.872397	1
AT1G50840_2	7.91192	9.44926	0.837305	0.505721	1
AT1G50940_1	10.9338	12.3256	0.887083	0.861022	1
AT1G51080_1	9.12282	8.67526	1.05159	0.771957	1
AT1G51100_1	4.18457	3.62115	1.15559	0.257267	1
AT1G51100_2	2.20375	2.05856	1.07053	0.771416	1
AT1G51110_1	8.13457	9.39956	0.86542	0.300667	1
AT1G51140_1	6.9164	6.51936	1.0609	0.65166	1
AT1G51160_1	13.199	13.5587	0.973469	0.923582	1
AT1G51170_1	2.11562	2.01187	1.05157	0.856739	1
AT1G51200_1	4.80938	5.66398	0.849116	0.0545201	0.52645
AT1G51270_1	2.48016	3.4157	0.726106	0.649918	1
AT1G51310_1	7.26509	8.9355	0.813059	0.5356	1
AT1G51310_2	3.22764	2.91963	1.1055	0.870829	1
AT1G51350_1	3.02713	2.94988	1.02619	1	1
AT1G51350_2	2.87067	2.15139	1.33434	0.31282	1
AT1G51390_1	1.09397	1.41901	0.770941	0.0493247	0.497214
AT1G51405_2	2.65316	2.23314	1.18808	1	1
AT1G51450_1	2.0588	1.70905	1.20464	0.674402	1
AT1G51450_2	2.4215	2.0152	1.20162	0.571082	1
AT1G51510_1	12.8814	16.2173	0.794301	0.0872937	0.691354
AT1G51540_1	4.05916	2.95398	1.37413	0.499941	1
AT1G51550_1	3.35135	3.47247	0.965121	1	1
AT1G51560_1	11.667	11.894	0.980912	1	1
AT1G51570_1	2.69958	2.83078	0.953651	0.906031	1
AT1G51580_1	2.28406	2.53009	0.902755	0.692039	1
AT1G51580_2	8.88611	14.879	0.597226	0.193748	1
AT1G51590_1	15.8615	17.1921	0.922604	0.72457	1
AT1G51610_1	2.18001	3.00704	0.724967	0.439501	1
AT1G51630_1	4.66334	4.94022	0.943954	1	1
AT1G51650_1	6.62636	7.51506	0.881744	0.222894	1
AT1G51680_1	3.08447	2.88107	1.0706	0.618341	1
AT1G51690_1	10.3205	12.1978	0.846093	0.487575	1
AT1G51710_1	9.50946	11.8896	0.799811	0.467891	1
AT1G51720_1	13.9578	14.4258	0.967561	1	1
AT1G51730_1	8.64657	10.0458	0.860712	0.44028	1
AT1G51730_2	2.85503	2.36794	1.2057	0.177938	0.987306
AT1G51745_1	1.8274	1.61505	1.13148	0.815078	1
AT1G51745_2	4.85099	10.3883	0.466967	0.0332226	0.385021
AT1G51760_1	6.47332	8.0122	0.807934	0.731758	1
AT1G51940_1	10.3956	11.8724	0.87561	0.575409	1
AT1G51980_1	11.441	12.7484	0.897448	0.352525	1
AT1G52000_1	1.44031	1.36022	1.05888	0.898347	1
AT1G52040_1	2.95677	2.33964	1.26377	0.341315	1
AT1G52150_1	8.03755	10.1905	0.788732	0.676572	1
AT1G52220_1	4.88164	5.56977	0.876453	0.110493	0.795772
AT1G52260_1	2.35994	1.84634	1.27817	1	1
AT1G52280_1	8.36896	6.6724	1.25427	0.483316	1
AT1G52290_1	4.89489	5.66474	0.864097	0.54432	1
AT1G52290_2	3.40687	2.80316	1.21537	0.713214	1
AT1G52300_1	6.35279	6.9641	0.91222	0.166421	0.967102
AT1G52310_1	5.40659	6.18094	0.874719	0.85479	1
AT1G52320_1	1.77844	1.58959	1.1188	1	1
AT1G52320_2	2.24794	2.34971	0.956687	1	1
AT1G52320_3	3.002	4.97153	0.603838	0.345518	1
AT1G52320_4	2.31571	2.255	1.02692	0.910878	1
AT1G52320_5	2.63075	2.88277	0.912578	0.832324	1
AT1G52360_1	6.03161	4.66768	1.29221	0.0254235	0.321221
AT1G52360_2	11.6609	12.1634	0.95869	0.860809	1
AT1G52370_1	9.93937	12.9201	0.769296	0.449829	1
AT1G52380_1	7.90841	9.5159	0.831074	0.507981	1
AT1G52410_1	3.95361	2.96735	1.33237	0.527623	1
AT1G52420_1	10.4505	12.9855	0.804787	0.548306	1
AT1G52500_1	3.52598	5.07898	0.694229	0.0115383	0.182407
AT1G52510_1	8.5044	11.5615	0.735579	0.0217552	0.290683
AT1G52540_2	1.69152	1.69482	0.998052	1	1
AT1G52550_2	2.92556	2.64613	1.1056	0.843978	1
AT1G52590_1	6.41981	8.27966	0.775372	0.111088	0.799114
AT1G52600_1	8.44097	7.76012	1.08774	0.8106	1
AT1G52670_1	9.91872	10.3547	0.957895	0.785151	1
AT1G52700_1	1.37118	1.42725	0.960716	1	1
AT1G52710_2	1.84569	2.4459	0.754605	0.453994	1
AT1G52730_1	11.1531	14.294	0.780261	0.227855	1
AT1G52740_1	12.4267	14.1804	0.876326	0.315404	1
AT1G52770_1	3.17815	2.99589	1.06084	0.831941	1
AT1G52870_1	7.69195	7.36877	1.04386	0.73994	1
AT1G52880_1	3.94852	4.20736	0.938478	0.84582	1
AT1G52880_2	2.66484	2.04438	1.3035	0.774462	1
AT1G52905_1	5.94803	2.68399	2.21612	0.181709	0.991588
AT1G52930_1	6.34148	10.039	0.631686	0.22738	1
AT1G52980_1	3.68271	6.42514	0.573171	0.0324889	0.380439
AT1G53000_1	10.3712	7.66275	1.35346	0.314083	1
AT1G53030_1	3.06039	4.1396	0.739297	0.180694	0.990844
AT1G53035_1	3.18269	3.08405	1.03198	1	1
AT1G53040_1	8.93605	10.4716	0.853357	0.583025	1
AT1G53090_1	7.07187	6.52512	1.08379	1	1
AT1G53190_1	4.43081	6.43213	0.688856	0.317407	1
AT1G53210_1	6.56959	7.21602	0.910417	0.601947	1
AT1G53240_1	9.15306	9.03452	1.01312	0.908019	1
AT1G53250_1	4.11989	3.06396	1.34463	0.335696	1
AT1G53250_2	5.07084	3.47347	1.45988	0.201583	1
AT1G53280_1	5.04864	5.4996	0.918002	0.69183	1
AT1G53290_1	3.22283	4.35201	0.740539	0.496837	1
AT1G53310_1	6.20008	7.09404	0.873985	0.394599	1
AT1G53320_1	8.62547	9.49767	0.908166	0.742205	1
AT1G53350_1	2.57186	2.58161	0.996222	1	1
AT1G53380_1	4.0253	4.11782	0.977531	1	1
AT1G53390_1	6.84597	7.59228	0.901701	1	1
AT1G53400_1	15.0781	20.2132	0.745954	0.465353	1
AT1G53440_1	2.4612	3.04798	0.807488	0.488869	1
AT1G53440_2	2.72146	2.64665	1.02826	1	1
AT1G53450_2	3.07711	3.99093	0.771026	0.330042	1
AT1G53450_1	2.38054	2.44725	0.972741	1	1
AT1G53460_2	3.58913	3.12402	1.14888	0.607854	1
AT1G53510_1	5.52444	5.86058	0.942644	0.604369	1
AT1G53530_1	8.6423	8.72383	0.990654	1	1
AT1G53560_1	7.38343	9.63398	0.766395	0.213694	1
AT1G53560_2	3.18327	2.49139	1.27771	0.331995	1
AT1G53570_1	8.8146	10.2407	0.860739	0.431297	1
AT1G53580_1	6.21641	7.3745	0.84296	0.578188	1
AT1G53580_2	2.41624	2.47722	0.975384	1	1
AT1G53590_1	2.07541	2.03567	1.01952	1	1
AT1G53590_2	6.15901	6.46279	0.952996	1	1
AT1G53645_1	8.01279	10.85	0.738508	0.415367	1
AT1G53645_2	5.35262	7.14147	0.749513	0.182228	0.991799
AT1G53710_1	5.83069	6.74004	0.865083	0.718583	1
AT1G53720_1	10.593	10.1222	1.04651	0.860128	1
AT1G53730_1	5.67506	7.44467	0.762298	0.355858	1
AT1G53750_1	6.34491	7.09765	0.893945	0.687841	1
AT1G53760_1	2.71555	5.96963	0.454894	0.0789352	0.652355
AT1G53780_1	5.64756	5.98501	0.943617	1	1
AT1G53800_1	5.63911	5.69209	0.990691	0.963418	1
AT1G53850_1	16.2273	16.1959	1.00194	1	1
AT1G53920_1	4.63184	4.24682	1.09066	1	1
AT1G54030_2	5.86354	9.55466	0.613684	0.122739	0.838432
AT1G54030_1	2.04092	2.17503	0.938342	0.873426	1
AT1G54060_1	5.46177	5.02256	1.08745	0.592179	1
AT1G54080_1	6.80911	7.7108	0.883062	0.335281	1
AT1G54100_1	4.48037	7.34381	0.610088	0.0201277	0.274319
AT1G54110_1	3.39865	3.94379	0.861774	0.610225	1
AT1G54115_1	4.81586	3.79653	1.26849	0.669382	1
AT1G54130_1	6.70651	9.45439	0.709354	0.41046	1
AT1G54140_1	7.15147	6.83984	1.04556	0.890917	1
AT1G54150_1	5.58121	10.2622	0.543858	0.172233	0.97566
AT1G54170_1	2.35324	3.41158	0.68978	0.0526869	0.517953
AT1G54200_2	2.58761	2.54948	1.01495	1	1
AT1G54210_1	10.4018	11.4854	0.905658	0.85549	1
AT1G54220_1	16.6345	21.6188	0.769445	0.30987	1
AT1G54250_1	8.25674	10.2671	0.804196	0.481549	1
AT1G54260_1	2.02181	1.96762	1.02754	1	1
AT1G54290_1	4.52391	5.04509	0.896696	0.857722	1
AT1G54310_1	12.3515	14.9879	0.824095	0.419352	1
AT1G54320_1	10.1257	11.342	0.892759	0.500342	1
AT1G54340_1	9.44649	14.0501	0.672342	0.0380561	0.422019
AT1G54350_1	7.55124	10.1424	0.744519	0.0254715	0.321221
AT1G54370_1	14.7504	18.9818	0.777082	0.371215	1
AT1G54380_1	4.12358	4.65279	0.886261	0.837456	1
AT1G54380_2	1.8122	2.06085	0.879345	0.860941	1
AT1G54390_1	10.3952	11.9575	0.869343	0.757012	1
AT1G54460_1	4.37082	4.57457	0.955462	0.837577	1
AT1G54460_2	3.55691	3.07953	1.15502	0.4322	1
AT1G54570_1	3.96682	4.44573	0.892277	0.713468	1
AT1G54575_1	2.19732	2.00349	1.09674	0.777936	1
AT1G54580_1	8.92234	10.3649	0.860826	0.0995124	0.748159
AT1G54610_1	4.67176	4.29219	1.08843	0.738562	1
AT1G54610_2	2.78964	3.25097	0.858095	0.502157	1
AT1G54630_1	6.91918	8.30321	0.833314	0.0335527	0.387738
AT1G54630_2	2.01364	1.85681	1.08447	0.62287	1
AT1G54680_1	2.69699	2.66806	1.01084	1	1
AT1G54770_1	4.67756	4.42128	1.05797	0.845911	1
AT1G54780_1	3.05721	2.59803	1.17674	0.00515832	0.0993815
AT1G54780_2	5.44007	6.01334	0.904666	0.036945	0.415102
AT1G54820_1	2.84117	2.78629	1.0197	0.885276	1
AT1G54820_2	2.51135	2.74048	0.916391	0.870713	1
AT1G54830_1	2.65623	2.68067	0.990885	1	1
AT1G54830_2	9.9298	12.4721	0.796159	0.691531	1
AT1G54920_1	9.2161	8.19642	1.12441	0.717322	1
AT1G54990_1	2.44042	1.87414	1.30215	0.250336	1
AT1G54990_2	3.2527	4.22071	0.770653	0.389494	1
AT1G55000_1	8.74449	8.40119	1.04086	0.824753	1
AT1G55080_2	5.93422	4.72421	1.25613	0.531327	1
AT1G55080_1	3.35485	3.51103	0.955518	1	1
AT1G55090_1	8.44258	12.3168	0.685455	0.148794	0.919616
AT1G55110_1	4.92746	4.72873	1.04203	1	1
AT1G55110_2	3.65794	3.415	1.07114	0.89146	1
AT1G55130_1	10.7663	10.677	1.00836	1	1
AT1G55140_1	4.96171	5.1453	0.964318	0.904039	1
AT1G55150_1	4.42657	4.24071	1.04383	1	1
AT1G55160_1	2.46487	1.92991	1.27719	0.552013	1
AT1G55160_2	9.11915	11.3645	0.802427	0.238579	1
AT1G55210_1	2.08136	1.97038	1.05632	0.716086	1
AT1G55250_1	6.22331	13.1278	0.474057	0.0131665	0.201847
AT1G55265_1	4.9182	4.30296	1.14298	0.566702	1
AT1G55310_1	7.52507	8.7794	0.857128	0.389965	1
AT1G55325_1	2.9733	4.0052	0.742359	0.523825	1
AT1G55340_1	3.13758	3.15618	0.994108	1	1
AT1G55340_2	3.09132	2.88842	1.07024	0.553283	1
AT1G55350_1	11.2207	12.4851	0.898732	0.647646	1
AT1G55350_2	3.20459	2.88885	1.1093	0.577592	1
AT1G55360_1	3.03779	3.3285	0.912659	0.787908	1
AT1G55460_1	7.28247	8.30217	0.877177	0.323288	1
AT1G55475_1	1.81753	2.34129	0.776296	0.688137	1
AT1G55480_1	1.49502	1.55624	0.960662	0.642903	1
AT1G55480_3	8.50793	11.9375	0.712708	0.00905326	0.151808
AT1G55490_1	9.29957	10.1471	0.91648	0.0391069	0.429004
AT1G55510_1	6.84755	8.09012	0.846409	0.62359	1
AT1G55520_1	13.1693	19.7776	0.66587	0.589888	1
AT1G55520_2	5.86253	3.9457	1.4858	0.499011	1
AT1G55530_1	4.01644	4.14674	0.968577	1	1
AT1G55530_2	2.70058	2.77087	0.974632	1	1
AT1G55535_1	6.22992	8.31214	0.749497	0.337841	1
AT1G55540_1	4.37558	6.66653	0.656351	0.182753	0.992284
AT1G55540_2	2.22425	1.48098	1.50187	0.404817	1
AT1G55540_3	1.9887	1.94537	1.02228	1	1
AT1G55590_1	5.42459	5.96597	0.909256	1	1
AT1G55680_1	11.5473	13.7211	0.841569	0.222732	1
AT1G55730_1	6.85101	9.78469	0.700176	0.311182	1
AT1G55805_1	6.3571	6.71129	0.947224	1	1
AT1G55810_1	12.6087	12.7535	0.988651	1	1
AT1G55830_2	4.39009	1.8432	2.38177	0.030452	0.363382
AT1G55840_1	4.10715	4.72953	0.868407	0.405698	1
AT1G55850_1	2.31984	2.24024	1.03553	0.854733	1
AT1G55850_2	3.49235	2.97337	1.17454	0.684022	1
AT1G55900_1	5.44413	10.1008	0.538982	0.0268834	0.332812
AT1G55920_1	2.73914	2.7987	0.978718	1	1
AT1G55930_2	11.5377	12.4202	0.928948	1	1
AT1G55960_1	3.97641	6.25164	0.636059	0.289034	1
AT1G56000_1	10.3826	11.8513	0.876072	0.595702	1
AT1G56010_2	1.72533	1.80667	0.954975	1	1
AT1G56045_1	3.09742	3.4902	0.887461	0.0598787	0.55575
AT1G56050_1	12.6192	17.4371	0.723699	0.243925	1
AT1G56090_2	3.19484	2.66015	1.201	0.707331	1
AT1G56110_1	11.6895	10.8471	1.07766	0.189688	1
AT1G56180_2	4.66926	4.33554	1.07697	0.814004	1
AT1G56180_1	1.77165	1.38919	1.27531	0.631826	1
AT1G56190_1	1.76239	1.83922	0.958226	0.675089	1
AT1G56190_3	4.74863	4.33477	1.09547	0.248536	1
AT1G56200_1	7.26658	7.6512	0.949731	0.570477	1
AT1G56210_2	3.07381	2.48907	1.23492	0.661301	1
AT1G56230_1	10.0248	13.8351	0.724589	0.367331	1
AT1G56280_1	3.50453	3.27271	1.07083	0.277267	1
AT1G56290_1	5.64995	4.89801	1.15352	0.711547	1
AT1G56290_2	2.83665	3.18924	0.889444	0.843901	1
AT1G56300_2	3.83715	4.91252	0.781097	0.121115	0.832031
AT1G56310_1	8.80141	8.49981	1.03548	1	1
AT1G56330_1	9.41599	9.09612	1.03517	0.76259	1
AT1G56345_2	1.62401	1.86405	0.871228	0.82369	1
AT1G56450_1	10.535	12.8574	0.819371	0.195532	1
AT1G56460_1	1.73697	1.65164	1.05166	1	1
AT1G56460_2	2.24435	1.72359	1.30214	0.225916	1
AT1G56460_3	9.01554	9.34725	0.964512	1	1
AT1G56500_1	9.44948	9.92541	0.952049	0.777486	1
AT1G56510_1	2.17108	2.08468	1.04145	1	1
AT1G56510_4	1.80415	2.06801	0.872407	0.836675	1
AT1G56510_2	1.3509	1.45	0.931655	1	1
AT1G56510_3	1.82905	1.99527	0.916694	1	1
AT1G56560_2	2.56988	2.71757	0.945655	1	1
[truncated: 9,621 more rows]

## Sheet: F1CL_nonadditive_peaks
Peak	Enrichment		Ratio	pvalue	padj
	MPV	F1CL
AT1G01080_2	2.93646	1.55001	1.89448	1.35628e-06	8.32745e-05
AT1G01090_1	1.79476	2.61985	0.685061	0.000161191	0.00567999
AT1G01100_1	4.15875	7.36726	0.56449	1.25964e-39	1.17796e-36
AT1G01170_1	5.80695	8.11817	0.715302	0.00151259	0.0371665
AT1G02100_1	7.72692	13.5828	0.568875	0.0012324	0.0315764
AT1G02305_1	3.7313	8.67016	0.430361	1.97983e-05	0.000908254
AT1G02560_1	8.5575	12.6196	0.67811	1.50924e-08	1.4006e-06
AT1G02780_1	2.06716	6.06478	0.340846	1.52569e-126	9.27391e-123
AT1G02870_1	3.59991	7.83301	0.459582	0.000840103	0.0227972
AT1G03130_1	2.39947	3.26656	0.734554	2.04819e-14	3.2763e-12
AT1G03475_1	6.11391	9.89428	0.617923	2.79967e-24	1.13452e-21
AT1G03760_1	3.09907	12.8949	0.240334	0.000749138	0.0207455
AT1G04300_3	5.41798	9.2112	0.588195	0.0017567	0.0417929
AT1G04555_1	4.34189	12.8812	0.337073	0.0013812	0.03455
AT1G04790_2	5.6537	7.03172	0.804028	2.11106e-06	0.00012221
AT1G04800_1	5.04042	6.82546	0.738473	5.44534e-13	7.69756e-11
AT1G05060_1	2.99523	9.04473	0.331158	0.00176448	0.041896
AT1G07140_2	3.99229	3.27007	1.22086	0.000696457	0.019464
AT1G07770_1	4.72209	6.53589	0.722487	1.81802e-05	0.000843573
AT1G07890_1	4.36972	5.85415	0.746431	2.97307e-06	0.000167332
AT1G07920_1	1.71413	2.87549	0.596118	1.1383e-12	1.57253e-10
AT1G08040_1	4.19206	9.47057	0.442641	7.07549e-06	0.000352527
AT1G08360_1	7.67381	10.081	0.761212	0.000238188	0.00793582
AT1G09270_2	4.61831	9.79978	0.471266	2.94303e-05	0.00127325
AT1G09340_1	4.19145	5.50635	0.761203	7.25241e-06	0.000359867
AT1G10500_1	13.835	5.77214	2.39687	2.07948e-05	0.000939788
AT1G10760_1	9.96646	14.4433	0.690042	0.00161118	0.0390183
AT1G10960_1	3.23761	2.53995	1.27468	3.92589e-08	3.36106e-06
AT1G11310_2	2.72122	1.77408	1.53388	0.000394143	0.0121
AT1G11650_1	11.5143	16.2658	0.707883	0.000222109	0.00747972
AT1G11660_1	4.18099	11.7041	0.357226	0.000518805	0.0151979
AT1G11840_1	4.37888	6.35043	0.689541	3.72912e-08	3.2615e-06
AT1G11860_1	4.62122	3.99264	1.15743	0.00140166	0.0348466
AT1G11930_1	3.31927	6.41552	0.517381	8.57162e-06	0.000420182
AT1G12270_1	3.10478	11.7012	0.265339	1.13407e-07	8.9525e-06
AT1G12350_1	4.87115	8.94528	0.54455	0.000217319	0.00733873
AT1G12840_2	11.0816	15.0945	0.734149	0.00142477	0.0353489
AT1G13270_1	7.87001	12.2536	0.64226	0.00213419	0.0484961
AT1G13560_1	5.29103	14.4285	0.366707	6.45021e-07	4.26169e-05
AT1G13990_1	2.88204	20.2622	0.142237	2.42907e-17	5.18073e-15
AT1G14400_1	6.76412	11.5248	0.586918	3.1318e-06	0.000175307
AT1G15270_1	5.64542	8.95174	0.63065	3.7617e-08	3.2665e-06
AT1G15810_3	1.33372	4.97149	0.268273	2.88013e-13	4.21853e-11
AT1G16210_1	6.21371	10.7202	0.579629	0.000526626	0.0153899
AT1G16880_1	3.82587	5.31532	0.719781	1.79407e-06	0.000107441
AT1G17290_2	3.23371	4.87837	0.662868	0.00184049	0.043362
AT1G18540_1	2.93827	2.42563	1.21135	3.21843e-05	0.00138578
AT1G18800_1	4.67661	7.06929	0.661539	0.00123376	0.0315764
AT1G19660_1	3.45331	6.00489	0.575084	3.14288e-07	2.19586e-05
AT1G19800_1	3.76064	11.7682	0.319558	0.00158598	0.0386388
AT1G20110_2	7.12662	12.8507	0.554572	0.00123956	0.0316364
AT1G20340_1	4.22042	3.50387	1.2045	2.20247e-21	6.53058e-19
AT1G20440_1	3.66756	2.91623	1.25764	4.62739e-05	0.00188776
AT1G20450_1	4.86889	3.92368	1.2409	0.000164768	0.00577258
AT1G20580_1	3.10453	8.20738	0.378261	1.70349e-20	4.50204e-18
AT1G21750_1	4.54047	7.0534	0.643728	0.000166217	0.00580663
AT1G22300_2	3.87608	3.11136	1.24578	2.53138e-05	0.00112314
AT1G22530_3	4.5976	3.11182	1.47746	0.000153473	0.00545546
AT1G23490_1	4.1807	5.84597	0.715142	5.20107e-06	0.00027254
AT1G26110_1	3.99153	6.2876	0.634826	1.70328e-06	0.000103534
AT1G26850_1	5.73763	11.1991	0.512331	0.000446198	0.0133607
AT1G27090_1	1.64324	4.57447	0.359219	1.2459e-14	2.07485e-12
AT1G27350_1	4.08625	9.02145	0.452948	0.000724901	0.0202124
AT1G28120_1	8.06355	16.6671	0.483802	0.00112555	0.0292378
AT1G28150_1	2.7058	5.30894	0.509668	0.000116494	0.00427859
AT1G29070_1	4.115	6.93158	0.593659	1.17695e-18	2.69965e-16
AT1G29250_1	5.20424	15.4359	0.337152	7.50829e-09	7.18727e-07
AT1G30880_1	4.09176	6.42717	0.636635	0.00120918	0.0311441
AT1G31330_1	2.57957	2.21631	1.1639	2.91626e-12	3.89594e-10
AT1G31810_2	14.8739	4.29843	3.46031	1.17421e-09	1.23447e-07
AT1G32470_1	3.95861	3.13445	1.26294	1.11678e-06	7.10822e-05
AT1G32990_1	3.15121	2.43149	1.296	0.000562312	0.0162763
AT1G34430_1	7.82429	17.6226	0.443991	4.20765e-07	2.88996e-05
AT1G36320_1	6.80759	11.311	0.601857	0.000547159	0.0159134
AT1G44575_1	5.7395	6.6267	0.866117	0.000192911	0.0066249
AT1G45000_1	4.1844	6.91845	0.604817	3.3684e-05	0.00143683
AT1G45474_1	6.40644	8.59959	0.744971	0.00116826	0.0301541
AT1G47200_1	3.75517	15.1004	0.248681	1.33545e-06	8.24117e-05
AT1G47420_1	3.22806	5.02506	0.642392	1.60821e-07	1.19214e-05
AT1G48160_1	3.65559	14.5618	0.25104	1.33939e-19	3.32306e-17
AT1G48620_1	2.25372	3.45945	0.651466	0.000134538	0.00488231
AT1G48920_1	4.01157	4.92939	0.813807	9.01301e-06	0.000440045
AT1G49750_1	5.6666	4.45649	1.27154	1.66886e-07	1.2296e-05
AT1G49970_1	7.98682	14.0403	0.568851	7.87595e-11	9.20653e-09
AT1G51070_1	5.64114	11.2298	0.502339	0.000605335	0.0173154
AT1G51610_2	3.63686	6.39149	0.569015	0.000438872	0.0131737
AT1G53670_1	4.30978	9.12032	0.472547	2.48069e-07	1.76361e-05
AT1G53750_2	6.68075	9.66304	0.691371	0.000798712	0.0218259
AT1G54360_1	6.78019	11.6632	0.58133	0.000765571	0.0211524
AT1G54410_1	7.65775	6.36301	1.20348	2.64499e-32	1.89148e-29
AT1G54520_1	7.33061	14.1818	0.516901	2.31984e-14	3.66264e-12
AT1G55480_2	2.9634	2.54398	1.16487	0.000499227	0.0147667
AT1G55670_1	2.7246	2.14404	1.27078	4.89499e-43	5.95084e-40
AT1G56070_1	6.37641	8.33552	0.764968	6.63102e-06	0.000334495
AT1G56190_2	1.75201	1.45374	1.20518	0.000214501	0.00726374
AT1G58080_2	1.83092	1.3039	1.40418	5.3209e-05	0.00214904
AT1G62430_1	4.62675	10.8708	0.425614	0.00170568	0.0408994
AT1G63010_1	3.90824	7.45731	0.524082	0.00200231	0.0461898
AT1G64500_1	2.11827	3.60065	0.588301	0.000895498	0.0238741
AT1G64520_1	9.64495	17.0409	0.565987	8.32342e-05	0.00317203
AT1G65930_1	7.41336	9.34316	0.793453	0.00134851	0.0338016
AT1G66070_1	7.34986	15.9075	0.462037	4.19112e-07	2.88996e-05
AT1G66240_1	6.30802	4.35193	1.44948	0.000555514	0.0161179
AT1G66260_1	5.83695	9.35592	0.623877	0.00214485	0.0486473
AT1G66410_1	5.83176	9.4946	0.614219	7.38686e-10	8.01804e-08
AT1G66580_1	4.08219	7.38752	0.552579	2.02588e-06	0.000117841
AT1G66670_1	8.04409	11.9796	0.67148	1.1505e-05	0.000548495
AT1G67280_1	3.3941	6.93837	0.489179	6.66317e-22	2.07703e-19
AT1G67430_1	2.83192	3.36346	0.841966	8.0113e-05	0.00306268
AT1G67700_1	8.35376	5.87269	1.42248	6.85935e-05	0.00268997
AT1G67740_1	3.74226	3.04607	1.22856	9.26252e-21	2.61871e-18
AT1G67785_1	2.87118	5.9676	0.481128	1.21694e-22	4.22694e-20
AT1G67870_1	4.90287	7.60438	0.644744	2.09733e-23	7.49918e-21
AT1G68660_1	6.24125	10.2207	0.610649	0.000357041	0.0111582
AT1G69620_1	3.41647	4.34342	0.786584	0.000111746	0.00412915
AT1G70490_1	9.20872	12.2727	0.750343	0.00182821	0.0431563
AT1G70730_1	4.33303	7.96231	0.544193	4.1839e-06	0.000230153
AT1G70760_1	6.43035	8.76427	0.7337	3.41006e-05	0.00144446
AT1G72150_1	3.31085	4.31742	0.766858	2.42236e-08	2.18138e-06
AT1G72370_1	4.49487	8.96735	0.501248	2.47002e-42	2.72982e-39
AT1G72750_2	1.5854	5.11446	0.309983	1.0142e-05	0.000487338
AT1G73230_1	8.29385	12.1745	0.681245	3.57208e-06	0.000198291
AT1G73530_1	4.4025	17.0875	0.257645	5.06022e-30	2.67466e-27
AT1G73950_1	4.11101	19.3494	0.212462	1.72419e-07	1.26271e-05
AT1G75460_2	2.04569	4.12113	0.496391	6.36749e-10	6.97383e-08
AT1G75510_1	4.80168	13.1321	0.365644	6.10704e-06	0.000312243
AT1G76010_1	3.65851	8.79204	0.416116	2.05066e-22	6.92495e-20
AT1G76300_1	4.90426	8.9831	0.545943	0.000282078	0.00904808
AT1G76670_1	4.05127	6.47124	0.626043	0.000381203	0.0117921
AT1G78380_1	3.14233	4.48024	0.701375	1.72041e-06	0.000104055
AT1G78870_1	7.66263	17.7402	0.431937	1.91177e-05	0.000880354
AT1G78900_1	5.77442	7.15871	0.806629	0.000510979	0.0150048
AT1G79050_1	3.31966	7.01636	0.473131	1.50018e-07	1.12578e-05
AT1G80070_1	9.89581	16.3814	0.60409	0.00209213	0.0477186
AT1G80230_1	3.99373	11.8363	0.337413	3.54322e-14	5.52242e-12
AT1G80480_1	8.88716	14.2721	0.622693	6.46328e-08	5.27343e-06
AT2G01600_1	4.19932	10.9048	0.385089	9.18071e-05	0.00343415
AT2G04030_1	2.40134	1.94613	1.23391	0.000136028	0.0049217
AT2G04340_1	4.03182	14.161	0.284714	6.11285e-06	0.000312243
AT2G04450_1	2.11519	6.58248	0.321337	0.000266604	0.00864295
AT2G05380_1	1.27096	2.53194	0.50197	2.80466e-11	3.51508e-09
AT2G05710_2	5.06032	8.94382	0.56579	1.8288e-06	0.000108625
AT2G07050_1	10.2125	22.9847	0.444318	0.00108486	0.0284768
AT2G10940_1	3.20537	2.89336	1.10784	1.01919e-07	8.1515e-06
AT2G14890_2	4.02156	5.53099	0.727095	0.00168242	0.0404213
AT2G17340_1	5.56594	11.5725	0.480961	9.40587e-06	0.000455567
AT2G17360_1	3.65982	6.15543	0.594568	2.13364e-13	3.20231e-11
AT2G18960_1	3.17668	4.76624	0.666497	1.21097e-20	3.27151e-18
AT2G19740_1	3.54955	5.72562	0.619942	7.4743e-05	0.00289379
AT2G20420_1	5.57436	7.46918	0.746315	0.00203163	0.0467774
AT2G20840_1	5.75295	13.0603	0.440492	0.000372983	0.0115968
AT2G21140_1	3.54571	2.5499	1.39053	0.00127387	0.0321852
AT2G21170_1	10.2595	12.1992	0.840997	0.00125652	0.0318905
AT2G21170_2	3.79775	3.03719	1.25042	0.000783788	0.0216066
AT2G21660_1	2.68779	1.70107	1.58006	3.50753e-49	5.33012e-46
AT2G22670_1	2.25245	4.23995	0.531245	2.30019e-05	0.00103568
AT2G22990_1	1.84003	4.37804	0.420286	8.20825e-13	1.14698e-10
AT2G23670_1	2.44555	3.32043	0.736517	3.42861e-10	3.824e-08
AT2G24200_1	3.36922	4.16236	0.809449	0.000180689	0.00623106
AT2G27290_1	7.34719	11.3709	0.64614	5.99233e-05	0.00237292
AT2G27530_1	5.60141	7.5796	0.739011	7.51412e-05	0.00289997
AT2G27710_1	1.81572	2.55508	0.710629	3.62045e-15	6.37881e-13
AT2G27720_1	3.48653	4.15926	0.838259	0.000199712	0.00681992
AT2G27730_1	3.90695	7.23597	0.539934	7.14956e-14	1.10022e-11
AT2G28190_2	4.51583	6.94402	0.65032	3.67635e-13	5.32064e-11
AT2G28800_1	4.04613	5.8922	0.686693	1.87276e-18	4.21615e-16
AT2G29450_2	2.6238	1.9393	1.35296	0.00132225	0.0332806
AT2G30110_1	9.28639	15.2962	0.607106	0.00110578	0.028901
AT2G30390_1	4.23424	6.35375	0.666415	0.000352357	0.0110974
AT2G30410_1	4.31745	14.0528	0.307231	3.51039e-12	4.63868e-10
AT2G30570_1	1.06327	1.28192	0.829435	6.69989e-06	0.000336573
AT2G30950_1	4.65857	5.5601	0.837857	0.00189661	0.0442943
AT2G31530_1	3.01338	11.3751	0.26491	0.000130879	0.00476375
AT2G32580_1	3.96076	7.18787	0.551034	3.39635e-05	0.00144368
AT2G32690_1	3.47822	4.25037	0.818332	2.4813e-05	0.00110902
AT2G33150_1	4.02547	6.11716	0.658062	1.1494e-07	9.015e-06
AT2G33490_1	4.21298	16.964	0.248349	0.00029994	0.00957052
AT2G33800_3	4.64413	3.73356	1.24389	0.000118864	0.00435248
AT2G33990_1	2.62423	9.78098	0.268299	2.05408e-07	1.4864e-05
AT2G34480_1	4.647	8.62669	0.538676	2.59357e-29	1.31375e-26
AT2G35370_1	4.59941	3.8714	1.18805	0.00023276	0.00779521
AT2G35840_1	3.13431	4.97971	0.629416	1.93134e-06	0.000113427
AT2G36120_1	4.12721	5.78807	0.713055	0.000854111	0.0230743
AT2G36835_1	6.00515	8.4848	0.707754	0.00218268	0.0493212
AT2G37220_2	3.35342	3.92459	0.854465	2.05025e-05	0.000930031
AT2G37600_1	1.62918	2.87665	0.566348	0.000110766	0.00410545
AT2G38140_1	2.34947	1.77533	1.3234	4.42352e-06	0.000241151
AT2G38140_2	2.35184	1.76762	1.33051	1.83172e-06	0.000108625
AT2G38670_2	6.14957	13.2013	0.465832	2.35815e-06	0.000135227
AT2G39470_1	3.19875	4.41892	0.723876	0.000162517	0.00571016
AT2G40060_1	3.3516	2.46297	1.3608	5.58979e-07	3.7338e-05
AT2G40290_1	4.23269	5.61327	0.75405	0.000472054	0.0140656
AT2G40510_1	2.77034	2.19278	1.26339	0.00139193	0.0347468
AT2G42590_1	10.1897	14.6963	0.693349	4.76799e-06	0.000252019
AT2G43460_1	5.23719	7.55246	0.693441	0.000361294	0.0112622
AT2G43970_2	2.53543	1.97459	1.28403	3.99461e-06	0.000220739
AT2G44920_1	7.0298	10.9551	0.641695	4.71053e-06	0.000251166
AT2G45060_1	3.06072	5.58876	0.547656	0.000254517	0.00836261
AT2G45070_1	3.71442	5.84612	0.635365	2.90368e-08	2.57665e-06
AT2G45660_1	7.36837	12.9182	0.570389	0.000108908	0.00404892
AT2G46170_1	5.00383	8.33814	0.600113	0.00192897	0.0447529
AT2G46820_1	2.93684	3.76859	0.779294	1.81801e-11	2.32648e-09
AT2G47170_1	6.90838	9.95913	0.693673	2.185e-06	0.000125891
AT2G47380_1	4.27063	9.41413	0.45364	2.9109e-07	2.04554e-05
AT2G47610_1	6.4312	8.84879	0.726789	3.88161e-08	3.34672e-06
AT2G48100_1	4.30603	14.4192	0.298632	0.000664174	0.018662
AT3G01280_1	11.5883	18.1326	0.639087	0.000230865	0.0077531
AT3G01500_1	2.28075	1.68221	1.35581	1.16558e-30	7.4579e-28
AT3G01500_2	5.66237	4.26282	1.32831	2.13624e-51	3.71005e-48
AT3G01540_1	5.22981	10.6543	0.490862	3.25902e-16	6.28888e-14
AT3G02080_1	7.16392	9.8518	0.727169	0.00205244	0.0470078
AT3G02560_1	8.07216	18.5099	0.4361	5.46752e-10	6.0426e-08
AT3G02780_1	6.52214	9.63691	0.676788	0.00104861	0.027653
AT3G02900_1	5.92917	13.4605	0.440488	2.5527e-05	0.00112848
AT3G03070_1	7.90212	12.8762	0.613701	7.038e-05	0.00274234
AT3G03920_1	3.48282	7.04485	0.494378	3.71161e-08	3.2615e-06
AT3G04120_1	6.68946	10.1677	0.65791	0.000664691	0.018662
AT3G04400_1	3.8919	5.95911	0.653102	3.92131e-13	5.60839e-11
AT3G04550_2	4.41643	3.6961	1.19489	0.000396985	0.0121565
AT3G04840_1	7.10683	16.1624	0.439713	3.12785e-30	1.72842e-27
AT3G05560_1	2.48802	6.42348	0.387332	9.38981e-16	1.75618e-13
AT3G05590_1	10.046	13.8161	0.727126	4.48213e-08	3.78397e-06
AT3G06050_1	2.69945	6.65186	0.405819	2.33974e-10	2.63372e-08
AT3G06483_1	7.42825	10.6482	0.697606	0.000871999	0.0234795
AT3G06580_1	4.61777	14.3587	0.321601	1.57326e-09	1.62086e-07
AT3G06720_1	7.29903	13.0053	0.561235	0.00172672	0.0412411
AT3G06980_2	6.37371	9.29583	0.685652	0.00209716	0.0477438
AT3G07700_1	4.26172	9.42251	0.452291	0.00053575	0.015619
AT3G09630_1	2.02285	5.39166	0.375181	3.08961e-43	4.17337e-40
AT3G09735_1	12.2158	21.1976	0.576282	0.000208834	0.00711147
AT3G09840_2	2.8894	7.65452	0.377476	1.15491e-12	1.57755e-10
AT3G09900_1	5.56682	10.7667	0.517038	0.00179412	0.0424341
AT3G10220_1	4.53572	8.76297	0.5176	8.57091e-05	0.003246
AT3G10520_1	2.40199	5.18042	0.463666	8.79393e-08	7.12719e-06
AT3G11510_1	3.60848	5.67209	0.636181	3.92338e-09	3.8465e-07
AT3G12260_1	7.1054	12.7514	0.557226	9.31582e-08	7.50016e-06
AT3G12390_1	2.68302	1.98105	1.35434	4.68989e-06	0.000251166
AT3G12780_1	3.26646	2.91885	1.11909	1.73783e-08	1.60052e-06
AT3G12780_2	2.53801	2.21247	1.14714	0.000434228	0.0131082
AT3G13350_1	4.72886	22.381	0.211289	2.92855e-06	0.000166367
AT3G13490_1	8.14973	14.3483	0.567992	0.00106117	0.0279234
AT3G13580_1	3.08338	4.45524	0.692081	0.000593397	0.0170542
AT3G13580_2	7.64564	11.3068	0.676199	0.00158506	0.0386388
AT3G13882_1	3.66989	6.5508	0.56022	0.00205323	0.0470078
AT3G13920_1	3.99914	7.08996	0.564057	1.70212e-16	3.39224e-14
AT3G14067_1	4.41676	3.30464	1.33653	0.00153585	0.0376438
AT3G14100_1	4.78472	8.96751	0.533561	0.000800721	0.0218259
AT3G14415_1	3.89949	5.68985	0.685342	6.93571e-21	2.00756e-18
AT3G14420_1	4.86666	4.1822	1.16366	1.07633e-06	6.88681e-05
AT3G15000_2	7.62359	10.5807	0.720516	3.51323e-05	0.00147787
AT3G15190_1	5.57843	11.3792	0.49023	2.06709e-19	4.83262e-17
AT3G15640_1	9.43357	16.1611	0.58372	0.000139888	0.00504636
AT3G16140_1	5.63626	6.78283	0.83096	0.000128356	0.00468597
AT3G16480_1	6.98713	13.0978	0.53346	0.00139852	0.0348396
AT3G17170_1	6.16243	8.38559	0.734884	1.14892e-06	7.27468e-05
AT3G17240_1	10.6838	17.0809	0.625485	0.0012692	0.0321452
AT3G17300_1	5.35383	10.2463	0.522511	0.00177626	0.0420935
AT3G18490_1	4.24853	3.16473	1.34246	0.000423107	0.0128915
AT3G18680_2	3.02226	5.03419	0.600347	0.000275467	0.00890653
AT3G18740_1	5.1076	6.75701	0.755897	0.000256715	0.00841209
AT3G19130_1	5.29792	10.7066	0.49483	4.47972e-06	0.000243125
AT3G19290_1	3.54054	6.62849	0.534139	0.00102183	0.0270052
AT3G19900_1	5.48073	12.4036	0.441864	0.000379234	0.0117611
AT3G20470_1	3.05106	6.42712	0.474716	1.28754e-07	9.84441e-06
AT3G20970_1	5.86491	25.8221	0.227127	1.35517e-07	1.02967e-05
AT3G21055_1	2.19686	2.64414	0.830841	2.8581e-09	2.84802e-07
AT3G22120_1	7.09046	6.11173	1.16014	5.33959e-06	0.000278598
AT3G23450_1	5.9692	9.19994	0.64883	2.82957e-33	2.14994e-30
AT3G23600_1	5.89157	11.1401	0.528863	1.56494e-12	2.11389e-10
AT3G24430_1	4.08416	5.61063	0.727933	0.000728091	0.0202549
AT3G25520_1	2.37486	3.08695	0.769321	2.37889e-09	2.39009e-07
AT3G25770_1	2.10424	1.70887	1.23137	3.84048e-05	0.00160442
AT3G25920_1	5.68077	7.34706	0.773203	0.000113674	0.00418767
AT3G26060_1	3.61121	2.50182	1.44343	4.08098e-15	7.00158e-13
AT3G26060_2	4.08015	5.22241	0.781278	4.07701e-08	3.46603e-06
AT3G26710_1	3.83196	4.95675	0.773079	0.00173085	0.0412586
AT3G26740_1	3.33922	3.02249	1.10479	0.000261674	0.00850579
AT3G27430_1	6.47051	12.4065	0.521544	1.10639e-09	1.1903e-07
AT3G28730_1	4.19596	14.6079	0.28724	1.39439e-17	3.02707e-15
AT3G28900_1	3.28772	6.80421	0.483189	1.32956e-15	2.44901e-13
AT3G44110_1	3.68184	4.69263	0.7846	0.00162864	0.0393625
AT3G44750_1	2.54561	8.18144	0.311145	7.59066e-15	1.28166e-12
AT3G46010_1	4.64787	6.91183	0.672452	0.000241767	0.0080086
AT3G46440_1	2.85017	10.2337	0.278508	1.16354e-06	7.32912e-05
AT3G47070_2	2.18301	1.74985	1.24755	1.50463e-05	0.000706246
AT3G47833_1	11.8695	22.831	0.519884	4.26432e-05	0.00177539
AT3G48140_1	8.59681	11.7101	0.734139	5.05401e-06	0.000265981
AT3G48500_3	3.44576	6.13414	0.561735	5.55903e-09	5.36358e-07
AT3G48930_1	5.55234	9.14858	0.606907	4.97797e-07	3.38085e-05
AT3G49470_2	6.16075	10.3194	0.597007	0.000155175	0.00549987
AT3G49910_1	1.99226	3.42546	0.581604	2.02908e-11	2.56953e-09
AT3G50550_2	4.03663	10.5879	0.381249	0.000696274	0.019464
AT3G51370_1	2.42725	1.74316	1.39245	0.00188787	0.0442213
AT3G52180_1	6.93976	11.4816	0.604423	1.31544e-06	8.15911e-05
AT3G52380_1	3.25534	2.49309	1.30575	1.93423e-07	1.40805e-05
AT3G52880_1	9.40956	11.8708	0.792662	0.00193511	0.0448097
AT3G52990_1	7.07762	12.4998	0.566219	5.54674e-07	3.72551e-05
AT3G53020_1	1.80741	8.60082	0.210144	1.75707e-85	7.12023e-82
AT3G53430_1	2.23792	6.81483	0.32839	3.48129e-24	1.36523e-21
AT3G53500_1	11.8915	18.499	0.64282	0.00148432	0.0366021
AT3G53520_2	3.92792	8.67914	0.45257	0.00190467	0.0442943
AT3G53740_1	4.95165	5.83954	0.847952	0.000960298	0.0255456
AT3G53870_1	7.20095	13.1278	0.548527	1.67819e-13	2.55022e-11
AT3G53920_1	4.28893	9.12268	0.470139	2.50336e-05	0.00111477
AT3G54050_1	3.0886	4.5526	0.678425	1.2445e-10	1.44089e-08
AT3G54300_1	5.63418	15.4517	0.364633	8.35849e-06	0.000411393
AT3G54890_1	2.14829	3.6974	0.581029	3.15736e-65	9.59601e-62
AT3G55040_1	6.76355	12.5438	0.539195	0.000330602	0.0104938
AT3G55330_1	4.15384	5.73312	0.724534	0.000486745	0.0144326
AT3G55360_1	3.27062	6.44379	0.507561	0.000245211	0.00810063
AT3G55610_1	3.86356	8.53669	0.452583	0.000881586	0.0236067
AT3G55800_1	2.362	1.65237	1.42946	5.83597e-24	2.21712e-21
AT3G55800_2	4.00411	2.71938	1.47244	5.37862e-11	6.41057e-09
AT3G56090_1	6.46874	11.1132	0.582075	0.000470063	0.0140407
AT3G56360_1	2.96987	3.90123	0.761266	3.14361e-06	0.000175307
AT3G56650_1	7.54553	12.3978	0.60862	0.000238264	0.00793582
AT3G56800_1	2.40161	3.49036	0.68807	2.36994e-07	1.70481e-05
AT3G58680_1	3.3967	6.95639	0.488285	1.47124e-14	2.41701e-12
AT3G59300_1	7.72407	12.7502	0.605801	5.58275e-05	0.00223255
AT3G59540_1	6.89906	10.892	0.633403	3.30472e-05	0.00141463
AT3G59920_1	14.2416	32.1647	0.442773	1.94581e-06	0.000113727
AT3G60245_1	2.35797	5.9022	0.399507	7.93174e-142	9.64261e-138
AT3G61050_1	6.50755	8.77134	0.74191	0.000735555	0.0204159
AT3G61260_1	5.12062	4.23422	1.20934	0.000349965	0.0110507
AT3G61470_1	5.20038	7.87619	0.660266	1.78036e-21	5.41097e-19
AT3G61860_1	3.07529	6.77263	0.454077	0.00034761	0.0110049
AT3G62030_1	10.3383	12.3666	0.83599	1.2526e-06	7.84943e-05
AT3G62120_1	24.691	12.0786	2.04419	0.00127608	0.0321852
AT3G62790_1	3.48659	12.5966	0.276789	1.45938e-30	8.87087e-28
AT3G63490_1	5.14558	8.3875	0.613483	2.80059e-29	1.36187e-26
AT4G00100_1	6.72962	10.8904	0.617938	5.85496e-11	6.91056e-09
AT4G00430_1	3.10374	1.8762	1.65427	4.47605e-05	0.0018474
AT4G00895_1	4.93082	3.46525	1.42293	5.41066e-05	0.00217806
AT4G01070_1	4.79403	3.54809	1.35116	0.000426381	0.0129588
AT4G01150_1	2.9808	2.58333	1.15386	0.0015986	0.0388683
AT4G01940_1	3.05908	3.95032	0.774387	0.000245902	0.00810142
AT4G02080_1	7.73542	14.6283	0.5288	0.000280859	0.00903281
AT4G02450_1	9.17874	11.788	0.778652	6.94643e-06	0.000347522
AT4G02580_1	7.62268	16.2758	0.468344	2.36924e-13	3.51254e-11
AT4G02770_1	3.33278	2.75358	1.21035	1.90486e-16	3.73506e-14
AT4G02840_1	6.41689	11.4867	0.558636	0.000169464	0.00590307
AT4G04640_1	1.84736	1.49254	1.23773	8.65548e-09	8.09421e-07
AT4G08920_1	3.55383	11.2985	0.314539	1.18757e-16	2.40621e-14
AT4G09000_1	6.17024	8.5153	0.724606	3.19313e-09	3.156e-07
AT4G09010_1	4.33405	5.50352	0.787506	0.000195396	0.00669135
AT4G09180_2	4.00879	9.39727	0.426591	0.000849803	0.023009
AT4G09650_1	3.03727	2.57806	1.17812	2.36566e-08	2.14622e-06
AT4G11150_1	10.2406	14.984	0.683435	0.000354841	0.0111404
AT4G11420_2	4.39306	3.71437	1.18272	0.000503999	0.0148716
AT4G12230_1	3.17669	7.9396	0.400107	1.65104e-05	0.000771987
AT4G12720_1	4.17209	8.54026	0.48852	0.000792595	0.0218
AT4G13340_1	4.75387	5.78181	0.822212	0.000639071	0.0181948
AT4G13840_1	2.69354	3.27598	0.822208	0.000604207	0.0173154
AT4G13850_1	4.48185	6.79874	0.659218	9.14259e-06	0.000444586
AT4G14500_1	6.10893	10.5458	0.579276	4.49806e-05	0.0018474
AT4G14960_1	2.22977	2.63327	0.846769	0.00151332	0.0371665
AT4G16146_1	2.80726	7.39886	0.379418	2.54752e-15	4.62241e-13
AT4G16150_1	3.26344	7.65577	0.426273	2.43795e-07	1.74342e-05
AT4G16720_1	5.87931	7.37149	0.797575	0.000311825	0.00992371
AT4G17040_1	12.1347	17.9946	0.674354	0.000355555	0.0111404
AT4G17100_2	2.92613	2.37338	1.2329	0.00108688	0.0284768
AT4G17370_1	4.63371	7.64437	0.606159	0.00143783	0.0356002
AT4G20260_1	2.95696	2.38756	1.23848	7.06602e-07	4.59367e-05
AT4G20360_1	4.3075	3.50357	1.22946	8.07795e-09	7.61269e-07
AT4G21110_1	8.54819	20.11	0.425073	5.54519e-06	0.000286863
AT4G21860_1	5.32596	8.78587	0.606196	0.000650744	0.0184595
AT4G22310_1	7.20552	13.49	0.534137	0.000430166	0.0130412
AT4G23470_1	5.70807	8.88194	0.642661	1.42757e-05	0.000672675
AT4G23670_1	2.66049	2.31626	1.14862	1.88479e-05	0.000871232
AT4G23710_1	4.20205	9.62161	0.436731	3.05946e-17	6.41273e-15
AT4G24280_1	5.11575	4.28977	1.19255	4.40068e-05	0.00182591
AT4G24690_1	2.62476	10.3346	0.253978	3.71221e-29	1.73574e-26
AT4G25050_1	5.24725	7.18281	0.73053	7.67331e-09	7.28785e-07
AT4G25130_1	4.55194	6.0906	0.747372	5.61102e-06	0.000289039
AT4G25130_2	4.62429	3.58097	1.29135	0.000652923	0.0184595
AT4G26230_2	2.69199	4.11458	0.654257	8.40407e-05	0.00319276
AT4G26670_1	3.90285	6.07087	0.642882	4.7579e-05	0.00192806
AT4G26900_1	6.60429	16.7114	0.395198	4.56363e-08	3.82621e-06
AT4G27820_1	8.39369	17.2536	0.486488	0.000578533	0.0166664
AT4G28660_1	4.72202	5.87521	0.803719	0.000174748	0.00606973
AT4G28750_1	2.14981	2.41174	0.891396	9.13838e-05	0.00342887
AT4G28770_1	6.36689	14.5608	0.437263	5.9405e-05	0.00236009
AT4G29010_1	4.87355	8.40923	0.579548	0.00205126	0.0470078
AT4G29020_1	1.36719	1.67759	0.814972	3.4479e-05	0.00145542
AT4G29670_1	6.38325	10.2851	0.620628	6.09914e-05	0.00240738
AT4G30010_1	4.78899	9.90113	0.483682	4.0891e-15	7.00158e-13
AT4G30190_1	3.47756	5.94227	0.585224	6.60104e-07	4.33777e-05
AT4G30950_1	8.48706	12.7977	0.663173	1.03568e-07	8.22926e-06
AT4G31080_1	4.6	11.8306	0.388823	6.24033e-05	0.00245513
AT4G31300_1	9.37014	17.1408	0.546656	2.44008e-05	0.00109462
AT4G31310_1	4.69505	17.9366	0.261758	1.81079e-14	2.93518e-12
AT4G31780_1	3.42311	9.71344	0.352409	5.08944e-11	6.12598e-09
AT4G32260_1	3.04585	2.33357	1.30523	1.397e-19	3.39666e-17
AT4G32940_1	3.41479	7.10079	0.480902	0.00018093	0.00623106
AT4G33010_1	5.87968	4.81587	1.2209	9.87582e-05	0.00368283
AT4G33510_1	4.92969	8.65472	0.569596	1.97373e-08	1.80411e-06
AT4G33640_1	2.6509	5.02133	0.527928	0.00147006	0.0363242
AT4G33650_2	7.63024	14.3799	0.530617	0.00165392	0.0398943
AT4G33670_1	3.03156	9.60217	0.315716	6.37553e-06	0.000324298
AT4G34265_1	5.61926	14.1797	0.396289	9.45086e-06	0.000455929
AT4G34720_1	5.60988	7.4275	0.755285	0.000799929	0.0218259
AT4G35250_1	8.05036	14.7121	0.547194	2.71731e-05	0.00118403
AT4G38680_1	2.64094	4.25227	0.621066	5.54265e-06	0.000286863
AT4G38680_2	3.44568	4.34307	0.793374	0.000872972	0.0234795
AT4G38710_1	6.56946	8.01523	0.819622	0.00166419	0.0400625
AT4G38770_1	4.22747	3.979	1.06245	7.28809e-05	0.00283071
AT4G39090_1	2.69191	3.41838	0.787481	0.000990142	0.026282
AT5G01530_1	3.94132	5.09321	0.773837	1.97541e-34	1.601e-31
AT5G01750_1	4.72699	3.68754	1.28188	0.00189965	0.0442943
AT5G01750_2	2.62972	4.00188	0.65712	0.00186031	0.0437442
AT5G02450_1	1.88274	1.48199	1.27041	1.53283e-06	9.36412e-05
AT5G02500_1	1.77643	1.42085	1.25025	6.33893e-16	1.2041e-13
AT5G02790_1	5.56246	14.7263	0.377723	1.64973e-31	1.11421e-28
AT5G03160_1	3.46835	14.4948	0.239283	1.1721e-07	9.13409e-06
AT5G03460_1	4.23067	15.2341	0.27771	1.9031e-28	8.56888e-26
AT5G03660_2	2.83498	2.11964	1.33748	0.00160544	0.0389567
AT5G03740_1	2.95448	6.68501	0.441955	1.13877e-09	1.21439e-07
AT5G03880_1	11.3833	17.5607	0.648226	1.21855e-07	9.40143e-06
AT5G04870_1	5.09628	15.4488	0.329882	1.12408e-05	0.000538009
AT5G06290_1	2.92392	2.18452	1.33847	0.000213429	0.00724766
AT5G06290_2	2.57714	3.94622	0.653065	4.15143e-09	4.03752e-07
AT5G07020_1	3.80816	6.65762	0.572001	3.68339e-17	7.58966e-15
AT5G08410_1	2.1619	3.70859	0.582942	4.67113e-06	0.000251166
AT5G08540_2	2.65243	4.8582	0.545969	0.00112081	0.029177
AT5G09650_1	3.77831	7.05262	0.535732	2.11608e-30	1.22501e-27
AT5G09880_1	5.78885	21.6691	0.267148	0.000175379	0.0060743
AT5G09900_1	4.95987	11.0543	0.448683	4.48391e-05	0.0018474
AT5G10450_1	11.7775	14.2997	0.823616	4.55155e-05	0.00186307
AT5G10940_1	3.32314	10.2452	0.324362	0.00100047	0.0264984
AT5G11580_1	3.23974	7.21398	0.449091	0.0015727	0.0384694
AT5G11770_1	5.90689	8.16938	0.723052	0.000261543	0.00850579
AT5G11910_1	5.00507	9.52111	0.525682	0.00215916	0.0488806
AT5G12440_1	5.44169	13.1729	0.413096	0.000510696	0.0150048
AT5G12860_2	3.60608	2.88645	1.24931	0.000143369	0.00515663
AT5G13420_1	2.95604	7.75783	0.381039	8.95433e-05	0.00338068
AT5G13450_1	6.92675	9.44395	0.733459	0.000879876	0.0236067
AT5G13630_1	4.66061	6.28958	0.741005	2.71629e-05	0.00118403
AT5G13650_1	5.70332	4.74429	1.20214	0.000629129	0.0179538
AT5G14105_1	4.19203	8.96411	0.467646	0.00110783	0.028901
AT5G14320_2	3.29183	6.50951	0.505696	1.29436e-25	5.61985e-23
AT5G14610_1	4.08373	10.3397	0.394957	5.49325e-05	0.00220401
AT5G14970_1	7.55502	11.0673	0.682645	2.89993e-05	0.00125909
AT5G15200_1	3.59997	6.86245	0.524589	8.14822e-35	7.07557e-32
AT5G15880_1	3.51584	14.85	0.236756	2.53688e-07	1.79307e-05
AT5G17710_1	6.27626	9.57351	0.655586	0.000278884	0.00899307
AT5G18380_1	2.9968	3.83243	0.78196	6.04281e-08	4.96368e-06
AT5G18500_1	2.98647	7.72837	0.38643	5.02723e-12	6.57162e-10
AT5G18800_1	9.58735	18.5181	0.517728	2.63426e-05	0.00115613
AT5G19140_1	4.63814	5.91063	0.784711	0.00190556	0.0442943
AT5G19180_1	5.64867	14.6292	0.386124	0.00133217	0.0334611
AT5G19500_1	4.00405	4.88545	0.819586	0.000803945	0.0218648
AT5G19770_1	2.88837	4.02236	0.718078	0.00014896	0.00532619
AT5G19855_1	4.88691	8.46312	0.577436	0.000575929	0.0166308
AT5G20130_1	9.28291	15.8422	0.58596	2.01171e-05	0.00091941
AT5G20920_2	2.16757	1.56707	1.38321	0.00171716	0.0410936
AT5G23040_1	5.26697	12.8635	0.40945	3.12465e-11	3.87616e-09
AT5G23140_1	4.32759	9.5324	0.453987	0.00024151	0.0080086
AT5G23900_1	4.20803	6.10608	0.689154	0.00188586	0.0442213
AT5G24490_1	4.86331	11.179	0.435041	1.79832e-20	4.65153e-18
AT5G24650_1	6.08556	14.1287	0.430723	6.64885e-07	4.3457e-05
AT5G25360_1	4.94823	15.7457	0.314259	3.22592e-05	0.00138578
AT5G26210_1	4.74747	11.2201	0.423123	4.27947e-06	0.000234349
AT5G26742_2	2.33907	1.79032	1.30651	2.68022e-08	2.39584e-06
AT5G26780_1	6.09113	15.5707	0.391192	4.75471e-06	0.000252019
AT5G27720_1	3.46137	4.72206	0.733021	5.80456e-05	0.00231364
AT5G27770_1	6.62547	8.97276	0.738398	0.00115083	0.0297673
AT5G28060_1	2.48415	2.10171	1.18197	0.000885451	0.0236581
AT5G28500_1	4.33317	3.30383	1.31156	0.000150761	0.00537477
AT5G28500_2	3.46943	2.76894	1.25298	6.45666e-06	0.000327056
AT5G36210_1	4.68686	12.3441	0.379685	7.62461e-07	4.93044e-05
AT5G37780_1	4.30112	14.2319	0.302216	8.10582e-25	3.39801e-22
AT5G38720_1	9.31247	1.81027	5.14424	2.95732e-06	0.000167219
AT5G39740_1	3.3274	2.95533	1.1259	0.00121772	0.0312978
AT5G39950_1	8.20115	19.0714	0.430024	5.48633e-07	3.70541e-05
AT5G40080_1	3.71109	7.95797	0.466336	0.000485066	0.014418
AT5G40810_1	5.63966	10.451	0.539631	3.8038e-05	0.00159458
AT5G41520_1	1.94547	8.23639	0.236205	3.11033e-59	6.30205e-56
AT5G42190_1	4.62184	9.65606	0.478646	1.74271e-06	0.000104882
AT5G42270_2	1.75387	4.69935	0.373215	2.19365e-63	5.33363e-60
AT5G42770_1	6.17639	16.2314	0.38052	0.00014722	0.00527949
AT5G42790_1	9.36745	12.7754	0.733243	0.000258056	0.00843329
AT5G42900_1	2.48373	3.8521	0.644771	0.000655711	0.0184953
AT5G42970_1	6.05674	12.7223	0.476073	6.95232e-05	0.00271767
AT5G42980_2	4.8914	6.9974	0.699032	1.28317e-06	7.99971e-05
AT5G43750_1	8.09379	4.09129	1.9783	1.91691e-09	1.94199e-07
AT5G44340_1	2.54927	3.47608	0.733375	1.73485e-05	0.000808068
AT5G45550_1	2.82763	1.62949	1.73529	0.000434531	0.0131082
AT5G46020_1	2.9508	4.70537	0.627113	1.54768e-19	3.68924e-17
AT5G46210_1	2.74843	5.11201	0.537642	8.1601e-06	0.000403261
AT5G46420_1	5.05299	17.5411	0.288066	4.51348e-11	5.54246e-09
AT5G47040_1	7.25147	15.5434	0.466529	4.51449e-06	0.000243923
AT5G47120_1	6.94918	14.223	0.488589	1.0565e-06	6.79568e-05
AT5G47180_1	5.04291	10.1655	0.496083	0.000155794	0.00550577
AT5G47210_2	2.58705	2.16653	1.1941	1.88621e-06	0.000111314
AT5G47435_1	4.04871	7.87201	0.514318	5.92425e-07	3.93558e-05
AT5G47700_1	2.56328	2.95243	0.868192	0.00208583	0.0476644
AT5G47770_2	2.84152	6.89523	0.412099	1.26935e-10	1.4558e-08
AT5G47890_1	9.43076	16.2038	0.582008	1.19598e-05	0.000567952
AT5G47930_1	4.99236	17.4376	0.286299	5.7106e-40	5.78531e-37
AT5G48440_1	3.98318	8.15023	0.488721	0.000651637	0.0184595
AT5G48760_1	2.11851	5.5304	0.383066	1.29676e-11	1.67709e-09
AT5G48880_1	5.91971	9.56616	0.618818	0.00112969	0.0292828
AT5G49910_2	2.80318	2.26346	1.23845	1.59349e-07	1.18847e-05
AT5G49910_3	5.55828	8.19454	0.67829	5.57105e-08	4.63885e-06
AT5G51570_1	5.41468	12.2152	0.443274	0.000437274	0.0131583
AT5G52440_2	3.58305	2.97395	1.20481	0.00124131	0.0316364
AT5G53140_1	7.21145	17.3004	0.416836	3.55922e-20	9.01447e-18
AT5G53860_1	5.33692	27.4621	0.194338	3.03202e-15	5.42062e-13
AT5G54280_1	0.498031	3.33502	0.149334	2.74079e-22	9.00534e-20
AT5G54600_1	3.42035	4.64481	0.736381	1.44251e-09	1.49886e-07
AT5G55190_1	5.46062	11.1607	0.489274	1.70621e-09	1.74306e-07
AT5G55230_1	3.73932	14.8686	0.251491	1.06517e-17	2.35441e-15
AT5G56030_1	9.32662	6.46234	1.44323	4.25029e-07	2.90285e-05
AT5G56710_1	1.80121	2.71605	0.663173	1.38765e-07	1.04781e-05
AT5G57040_1	7.28092	12.8492	0.566644	1.22187e-07	9.40143e-06
AT5G58040_6	4.05043	10.0139	0.40448	0.000387591	0.011929
AT5G58070_1	5.89531	14.0755	0.418836	2.0156e-10	2.29006e-08
AT5G58200_1	6.41753	9.5618	0.671163	4.72962e-05	0.00192301
AT5G58250_1	2.82763	2.15786	1.31039	0.000382712	0.0118087
AT5G58270_1	5.24879	10.8335	0.484497	1.2995e-05	0.000614708
AT5G58420_1	4.25907	8.93979	0.476418	5.05724e-22	1.61792e-19
AT5G59850_1	2.76052	5.27946	0.522879	1.17791e-09	1.23447e-07
AT5G59880_1	5.56862	7.27759	0.765173	9.13517e-05	0.00342887
AT5G59890_1	3.84963	6.29077	0.611949	7.73273e-05	0.00296551
AT5G59950_1	3.82229	11.9249	0.320532	4.6943e-11	5.70686e-09
AT5G60360_1	8.19429	11.1333	0.736019	5.86872e-08	4.85347e-06
AT5G62190_1	5.93678	9.98276	0.594703	3.76222e-07	2.61356e-05
AT5G63310_1	5.5267	11.1723	0.494678	9.5368e-21	2.63497e-18
AT5G63840_1	4.00847	10.1539	0.394773	2.04994e-05	0.000930031
AT5G64860_1	5.68048	9.57266	0.593407	2.61266e-05	0.0011508
AT5G65220_1	1.71458	2.54398	0.673975	2.03736e-23	7.49918e-21
AT5G65430_1	3.22264	4.76022	0.676993	7.6492e-05	0.00294276
AT5G66090_1	2.48725	4.97388	0.500063	2.51434e-06	0.000143506
AT5G66720_1	4.22808	6.86253	0.616111	0.000293699	0.00939606
AT5G67030_1	3.43505	5.41796	0.634012	0.00195439	0.0451703
AT5G67370_1	7.29477	3.91821	1.86176	0.000410922	0.0125517
AT5G67500_1	9.2038	14.017	0.656618	0.00124842	0.0317512
AT5G67560_1	8.46492	14.4987	0.583838	0.000795072	0.0218187

## Sheet: F1LC_additive_genes
Gene	Expression (FPKM)		Ratio	pvalue	padj
	MPV	F1LC
AT1G01010	1.55734	1.70378	0.914054	0.951049	0.979093
AT1G01020	3.19491	3.92094	0.814834	0.310651	0.534614
AT1G01030	1.058	1.13754	0.930076	0.952723	0.979675
AT1G01070	1.8575	1.42644	1.30219	0.0453538	0.14017
AT1G01080	43.7994	44.3169	0.988324	0.137483	0.312541
AT1G01110	0.983439	0.901614	1.09075	0.43667	0.657413
AT1G01130	3.46376	5.73051	0.604441	0.0384945	0.124005
AT1G01160	10.3506	12.2961	0.841779	0.223074	0.432858
AT1G01170	48.6739	45.9232	1.0599	0.0356626	0.116803
AT1G01180	4.49579	4.13912	1.08617	0.223092	0.432858
AT1G01190	4.16188	4.40479	0.944853	0.98367	0.993349
AT1G01200	1.05249	1.33389	0.789039	0.538505	0.738063
AT1G01210	7.0848	6.77506	1.04572	0.321937	0.547361
AT1G01220	8.29397	8.62902	0.961171	0.528579	0.731311
AT1G01225	1.56545	1.47905	1.05842	0.593354	0.77633
AT1G01250	3.34545	4.34044	0.770762	0.27955	0.501927
AT1G01260	4.21471	4.40968	0.955787	0.773928	0.88617
AT1G01290	3.56234	4.12998	0.862556	0.476783	0.689868
AT1G01300	38.5107	41.5671	0.926472	0.814631	0.906507
AT1G01340	1.23628	1.5223	0.812113	0.463931	0.679706
AT1G01350	6.69239	8.88218	0.753462	0.018633	0.070095
AT1G01360	5.76529	7.09394	0.812706	0.259056	0.47748
AT1G01370	1.95651	1.88705	1.03681	0.435171	0.656417
AT1G01420	2.74017	3.64492	0.751777	0.0825996	0.21772
AT1G01430	13.4197	14.2714	0.940317	0.86563	0.935607
AT1G01440	4.83025	5.11425	0.944468	0.864959	0.935011
AT1G01450	2.1019	2.35345	0.893116	0.793277	0.896057
AT1G01470	34.3955	34.2666	1.00376	0.0691248	0.191395
AT1G01510	9.43987	9.1771	1.02863	0.0844795	0.221355
AT1G01540	30.6313	33.4874	0.914711	0.653584	0.814928
AT1G01550	35.1247	37.7984	0.929263	0.913672	0.961299
AT1G01560	2.44327	1.95282	1.25115	0.0446744	0.138672
AT1G01600	5.87437	5.54922	1.05859	0.0749995	0.203087
AT1G01630	21.3953	26.0155	0.822404	0.0198314	0.0736949
AT1G01640	0.882504	0.926789	0.952217	0.994669	0.997809
AT1G01650	9.98534	11.2153	0.890334	0.536356	0.736892
AT1G01670	1.18345	1.09585	1.07993	0.439742	0.6604
AT1G01690	2.23914	2.44617	0.915364	0.86858	0.937137
AT1G01710	11.3177	11.9053	0.950638	0.746218	0.871358
AT1G01715	1.25664	1.63099	0.770474	0.443248	0.662996
AT1G01720	5.11368	5.94361	0.860367	0.60764	0.786061
AT1G01725	4.02893	3.97707	1.01304	0.650659	0.812864
AT1G01730	9.13361	8.8184	1.03574	0.201286	0.405008
AT1G01740	1.4414	1.75567	0.820998	0.441682	0.661833
AT1G01760	1.35752	1.37793	0.985193	0.776013	0.887384
AT1G01770	5.93205	5.46394	1.08567	0.0557771	0.164066
AT1G01780	4.96302	5.66727	0.875734	0.639668	0.805364
AT1G01800	41.8002	47.7594	0.875225	0.18321	0.380795
AT1G01830	6.44549	7.62011	0.845853	0.173006	0.366125
AT1G01840	1.78273	1.64414	1.08429	0.511452	0.718549
AT1G01860	5.48654	6.02434	0.910728	0.79305	0.896057
AT1G01910	19.4136	18.8175	1.03168	0.0548327	0.162028
AT1G01920	4.3414	4.93901	0.879002	0.575857	0.764817
AT1G01930	4.4273	5.11828	0.864999	0.47602	0.689121
AT1G01940	9.19862	10.7639	0.854578	0.415888	0.640019
AT1G01970	18.9147	21.2762	0.889006	0.461138	0.676914
AT1G01990	8.36923	8.54557	0.979365	0.531473	0.733243
AT1G02000	3.80175	3.69617	1.02856	0.34407	0.571228
AT1G02010	2.17174	2.37903	0.912871	0.912869	0.960816
AT1G02020	6.3739	5.68098	1.12197	0.0132887	0.0534377
AT1G02050	2.22727	2.00881	1.10875	0.263607	0.483218
AT1G02060	1.78798	1.58819	1.12579	0.181928	0.378806
AT1G02065	1.10669	0.81361	1.36022	0.0477423	0.14577
AT1G02080	12.0656	12.887	0.936263	0.92064	0.965218
AT1G02090	12.272	14.1533	0.867081	0.261981	0.481181
AT1G02100	11.8437	12.2412	0.967533	0.555441	0.750319
AT1G02110	8.73657	8.70624	1.00348	0.236211	0.449534
AT1G02120	25.1703	29.8062	0.844465	0.0260768	0.091383
AT1G02130	19.426	18.4567	1.05252	0.0879129	0.228038
AT1G02140	66.5233	66.7315	0.99688	0.083211	0.218988
AT1G02145	6.98978	8.92016	0.783593	0.0355293	0.116464
AT1G02160	17.6603	17.1393	1.0304	0.260394	0.479315
AT1G02180	4.7273	4.17797	1.13148	0.153142	0.336348
AT1G02190	0.743932	0.588452	1.26422	0.218759	0.427912
AT1G02260	6.17516	6.11309	1.01015	0.302791	0.526884
AT1G02290	3.04163	4.14338	0.734093	0.0432654	0.1354
AT1G02305	39.1624	37.9312	1.03246	0.0129729	0.0523183
AT1G02335	6.42361	7.2778	0.882631	0.586745	0.771737
AT1G02350	1.24175	1.73011	0.717727	0.462984	0.678852
AT1G02370	3.40019	3.46635	0.980915	0.700857	0.846278
AT1G02380	1.40027	1.42885	0.979995	0.941712	0.974859
AT1G02390	0.667974	1.16398	0.573869	0.0242169	0.0859596
AT1G02410	7.88041	7.84841	1.00408	0.378825	0.604831
AT1G02420	2.19695	2.39417	0.917627	0.924776	0.966961
AT1G02430	0.788182	1.0414	0.756848	0.481884	0.69453
AT1G02500	102.371	111.819	0.9155	0.827311	0.914015
AT1G02560	171.492	181.982	0.942354	0.608136	0.786297
AT1G02680	5.64682	5.40604	1.04454	0.330996	0.558074
AT1G02690	4.60549	4.37103	1.05364	0.169448	0.361064
AT1G02700	1.21011	1.34082	0.902509	0.803823	0.901168
AT1G02720	3.7614	4.15215	0.905893	0.773284	0.88617
AT1G02740	3.02559	2.93149	1.0321	0.41925	0.642966
AT1G02750	4.42103	4.67468	0.94574	0.891481	0.948472
AT1G02770	0.900023	0.803217	1.12052	0.609266	0.786789
AT1G02800	2.62246	2.17823	1.20394	0.0723837	0.197796
AT1G02820	1.31868	1.77971	0.740955	0.381094	0.607364
AT1G02840	26.657	26.4069	1.00947	0.0444719	0.138223
AT1G02850	1.18781	1.51136	0.785919	0.462396	0.678168
AT1G02860	2.3666	2.15034	1.10057	0.314652	0.539668
AT1G02870	14.3296	15.6853	0.913569	0.762058	0.880565
AT1G02890	13.296	13.9209	0.95511	0.418681	0.642328
AT1G02900	0.7758	0.979401	0.792117	0.623149	0.795419
AT1G02910	32.9979	34.5365	0.955451	0.428468	0.651037
AT1G02950	3.22335	3.73976	0.861913	0.65111	0.813125
AT1G02960	3.40207	4.37635	0.777374	0.109344	0.267047
AT1G02970	2.02442	2.0999	0.964058	0.750138	0.873402
AT1G03020	0.821538	1.85842	0.442062	0.0199969	0.0741134
AT1G03030	6.57062	6.94121	0.94661	0.756669	0.877719
AT1G03040	16.3987	17.0007	0.964587	0.509537	0.717118
AT1G03090	4.35305	3.75984	1.15778	0.0122922	0.0500539
AT1G03100	1.18319	1.63169	0.725128	0.111043	0.269834
AT1G03106	1.00578	1.38488	0.726261	0.236106	0.44947
AT1G03110	5.56433	5.5207	1.0079	0.406753	0.630937
AT1G03140	16.1753	15.581	1.03814	0.089054	0.23011
AT1G03150	9.38133	9.60318	0.976899	0.714055	0.853947
AT1G03160	24.7168	26.6634	0.926993	0.889187	0.946992
AT1G03165	1.16274	1.55911	0.745769	0.666237	0.822776
AT1G03190	2.56801	2.70254	0.950222	0.787855	0.893868
AT1G03210	10.7	11.217	0.953911	0.577091	0.765549
AT1G03250	11.3429	11.6707	0.971911	0.550688	0.746988
AT1G03260	4.65461	4.63039	1.00523	0.452198	0.669864
AT1G03270	1.79582	2.09798	0.855974	0.605721	0.784899
AT1G03280	10.3475	10.7825	0.959656	0.537617	0.7379
AT1G03290	6.49485	6.26942	1.03596	0.0297472	0.101286
AT1G03310	25.866	29.2056	0.885655	0.224717	0.435207
AT1G03330	17.4491	19.7693	0.882638	0.528167	0.731187
AT1G03340	1.17984	1.27653	0.924261	0.993493	0.997711
AT1G03360	4.87866	5.67114	0.860261	0.455205	0.672318
AT1G03365	3.87492	4.9402	0.784366	0.0316867	0.106572
AT1G03370	8.26509	8.98712	0.91966	0.869262	0.937481
AT1G03380	5.3746	6.23666	0.861776	0.275286	0.496869
AT1G03400	18.2994	18.0508	1.01377	0.114196	0.275332
AT1G03410	8.15285	10.1492	0.803303	0.0359698	0.117563
AT1G03430	9.823	11.2171	0.87572	0.426148	0.648745
AT1G03440	7.84269	8.76909	0.894356	0.508186	0.716057
AT1G03457	1.93675	2.0128	0.962213	0.873741	0.939115
AT1G03470	2.58303	2.63854	0.978964	0.765074	0.881704
AT1G03495	1.79134	2.83475	0.63192	0.0305873	0.103527
AT1G03510	1.03033	1.0267	1.00353	0.702615	0.847326
AT1G03520	2.91936	3.53263	0.826398	0.261284	0.480451
AT1G03530	4.49728	4.90647	0.916602	0.903247	0.956322
AT1G03550	2.12364	2.54289	0.83513	0.518995	0.724985
AT1G03590	5.13058	6.07951	0.843914	0.223809	0.433798
AT1G03610	4.67136	4.44651	1.05057	0.218268	0.42734
AT1G03630	136.81	153.524	0.891132	0.0839041	0.22026
AT1G03650	2.78468	2.49979	1.11397	0.328593	0.554913
AT1G03680	313.688	335.786	0.93419	0.813488	0.906026
AT1G03687	6.02333	6.30148	0.95586	0.767772	0.883328
AT1G03730	3.85322	3.27002	1.17835	0.09893	0.249093
AT1G03740	6.47836	5.98926	1.08166	0.0467725	0.143439
AT1G03750	1.24099	1.38135	0.898387	0.870611	0.937848
AT1G03760	3.56826	4.04513	0.882112	0.709721	0.851757
AT1G03770	0.890007	1.02229	0.8706	0.746093	0.871339
AT1G03780	3.37654	4.03338	0.837149	0.225698	0.436653
AT1G03820	5.08625	7.0926	0.71712	0.0262459	0.0918225
AT1G03830	2.37402	2.72955	0.869747	0.443994	0.663537
AT1G03860	29.175	32.8393	0.888417	0.33557	0.562538
AT1G03870	41.349	46.1561	0.89585	0.105699	0.260876
AT1G03900	45.0364	46.0401	0.978199	0.133244	0.30639
AT1G03910	13.5548	14.8235	0.914414	0.90619	0.957687
AT1G03950	8.70872	9.61118	0.906103	0.799332	0.898955
AT1G03960	2.69559	2.30984	1.167	0.045007	0.139344
AT1G04000	6.22444	8.06711	0.771582	0.0589179	0.171109
AT1G04030	1.42269	1.78497	0.797037	0.343279	0.570437
AT1G04050	1.18566	1.70304	0.696203	0.0301385	0.102287
AT1G04070	4.49184	5.31686	0.84483	0.518453	0.72461
AT1G04080	19.0908	20.4603	0.933064	0.92044	0.965154
AT1G04100	1.10598	1.08785	1.01666	0.682049	0.834149
AT1G04130	4.54242	5.64565	0.804587	0.18345	0.381035
AT1G04170	40.2654	42.549	0.946329	0.753628	0.875764
AT1G04190	13.4457	16.3582	0.821955	0.0697024	0.192517
AT1G04200	5.83072	7.14013	0.816613	0.0540102	0.160209
AT1G04210	8.79586	10.2214	0.86053	0.118986	0.28333
AT1G04230	2.96162	2.93785	1.00809	0.468289	0.683165
AT1G04240	8.26765	7.94448	1.04068	0.29218	0.515516
AT1G04250	10.8797	13.0771	0.831966	0.0948828	0.241602
AT1G04260	4.61512	5.07654	0.909107	0.852791	0.927821
AT1G04290	9.72173	10.1485	0.957947	0.691366	0.840034
AT1G04300	8.02944	9.51319	0.844033	0.0630587	0.179148
AT1G04310	1.85603	1.89542	0.979217	0.590151	0.774251
AT1G04340	9.66596	12.2102	0.791627	0.0585945	0.170445
AT1G04390	1.7541	1.8954	0.925448	0.947092	0.977716
AT1G04440	14.3794	15.3117	0.939113	0.835371	0.917787
AT1G04510	19.3828	19.648	0.986504	0.269525	0.489927
AT1G04530	24.4415	27.5129	0.888366	0.418085	0.641967
AT1G04555	3.63314	3.41616	1.06352	0.448707	0.667003
AT1G04590	9.96579	11.448	0.870524	0.400053	0.624187
AT1G04620	22.845	27.4221	0.833088	0.018393	0.0693201
AT1G04630	28.9567	29.052	0.996722	0.236615	0.449793
AT1G04635	1.98866	1.67027	1.19063	0.293375	0.516691
AT1G04640	21.5438	25.2422	0.853482	0.130554	0.302065
AT1G04660	1.65845	1.91914	0.864161	0.789736	0.894572
AT1G04730	1.79895	2.15136	0.836192	0.45148	0.66923
AT1G04750	32.8785	33.4456	0.983047	0.194087	0.395319
AT1G04760	1.30492	1.59898	0.816096	0.460996	0.676764
AT1G04770	7.23482	9.73603	0.743098	0.0317367	0.106719
AT1G04780	9.08098	8.40233	1.08077	0.0154569	0.0602244
AT1G04790	4.90573	5.98576	0.819567	0.113717	0.274812
AT1G04800	61.6477	59.6782	1.033	0.0168752	0.0647294
AT1G04810	12.9691	12.4562	1.04118	0.0187623	0.0704552
AT1G04820	171.896	188.682	0.911035	0.41001	0.634034
AT1G04830	4.0715	4.09171	0.995061	0.492275	0.703044
AT1G04850	29.504	31.1829	0.94616	0.525029	0.728482
AT1G04860	8.46161	8.35532	1.01272	0.167354	0.358056
AT1G04870	14.0262	15.387	0.911567	0.724618	0.859965
AT1G04900	4.12244	5.23674	0.787214	0.106713	0.26241
AT1G04910	9.7912	10.8578	0.901766	0.616296	0.791183
AT1G04930	1.60754	1.66062	0.968036	0.823282	0.911724
AT1G04940	1.62485	1.92478	0.844176	0.654778	0.815764
AT1G04945	1.67798	1.74548	0.961328	0.895456	0.950951
AT1G04950	5.97111	5.87012	1.0172	0.259918	0.478617
AT1G04960	7.3031	7.94451	0.919264	0.853753	0.928386
AT1G04970	6.14311	6.75894	0.908886	0.784633	0.892464
AT1G04980	15.1829	16.3851	0.92663	0.602665	0.783325
AT1G05030	3.34607	3.91918	0.853769	0.557554	0.751329
AT1G05055	6.03131	6.19965	0.972846	0.627053	0.797916
AT1G05060	8.84771	9.60796	0.920872	0.983116	0.993051
AT1G05065	1.73879	1.42495	1.22025	0.330196	0.557061
AT1G05070	11.427	13.1074	0.8718	0.461773	0.677609
AT1G05087	0.907716	1.02544	0.8852	0.955366	0.980659
AT1G05120	4.6239	5.01199	0.922567	0.93459	0.971211
AT1G05136	0.361665	0.458385	0.788999	0.806876	0.903023
AT1G05140	40.6408	44.7503	0.908169	0.677117	0.830836
AT1G05150	11.531	11.9366	0.966019	0.490573	0.702219
AT1G05160	2.89768	3.3016	0.877659	0.648842	0.81162
AT1G05180	11.3525	11.6651	0.973202	0.421037	0.644234
AT1G05190	417.199	475.586	0.877233	0.0284474	0.0978138
AT1G05200	5.49015	7.08167	0.775262	0.0157539	0.0611407
AT1G05205	16.7305	16.1359	1.03685	0.247464	0.463794
AT1G05210	5.52631	6.07798	0.909235	0.889325	0.947016
AT1G05270	13.4229	13.64	0.984078	0.312956	0.537865
AT1G05300	1.48614	1.15946	1.28175	0.0813205	0.215431
AT1G05310	1.68565	1.63823	1.02895	0.575046	0.764346
AT1G05350	12.1073	13.1226	0.922627	0.907825	0.958176
AT1G05360	3.30741	3.54828	0.932117	0.954919	0.980493
AT1G05370	1.1324	1.58037	0.716538	0.162071	0.350368
AT1G05380	6.92933	7.74944	0.894172	0.490905	0.702315
AT1G05385	18.7883	16.811	1.11762	0.0141532	0.0562013
AT1G05410	4.61189	5.11916	0.900909	0.727712	0.861324
AT1G05420	0.740323	0.814278	0.909176	0.839905	0.92012
AT1G05430	13.255	14.8193	0.894439	0.641818	0.807192
AT1G05440	1.04536	1.10602	0.945158	0.964317	0.984843
AT1G05460	3.92044	4.07891	0.961151	0.623388	0.79553
AT1G05470	2.39474	2.68326	0.892475	0.647163	0.810788
AT1G05500	12.7141	14.3061	0.888719	0.395321	0.620293
AT1G05520	11.1827	13.0547	0.856603	0.0836194	0.2197
AT1G05560	19.0432	22.7407	0.837406	0.0718268	0.196672
AT1G05590	6.01686	6.92065	0.869407	0.337413	0.565092
AT1G05600	2.59444	2.48129	1.0456	0.393405	0.618654
AT1G05620	6.5291	6.01885	1.08478	0.0866844	0.225759
AT1G05640	1.67639	2.38712	0.702264	0.0456628	0.140959
AT1G05670	1.3877	1.65792	0.837014	0.434561	0.656245
AT1G05680	0.690426	0.396416	1.74167	0.0499777	0.151038
AT1G05690	1.14988	1.69459	0.678558	0.0952451	0.242268
AT1G05710	1.9033	2.64607	0.719292	0.0397151	0.126866
AT1G05720	10.0722	8.95699	1.12451	0.0619398	0.176987
AT1G05750	1.76575	1.79897	0.981533	0.659231	0.818338
AT1G05780	1.70469	2.04834	0.83223	0.677733	0.831167
AT1G05785	1.50637	1.74966	0.860945	0.635023	0.802706
AT1G05790	5.45896	5.74761	0.94978	0.766313	0.882496
AT1G05810	6.41025	6.36644	1.00688	0.493796	0.704291
AT1G05830	4.18727	5.02341	0.833553	0.151644	0.334194
AT1G05835	4.85546	5.16483	0.940099	0.746256	0.871358
AT1G05840	5.56954	6.26612	0.888833	0.666527	0.822832
AT1G05850	228.288	258.197	0.884164	0.0369925	0.120227
AT1G05860	2.72712	3.31133	0.823572	0.297718	0.521822
AT1G05890	11.1621	11.6386	0.959059	0.558642	0.752127
AT1G05910	6.75134	7.91775	0.852684	0.156211	0.340991
AT1G05940	12.3309	12.2761	1.00447	0.17606	0.370546
AT1G05960	10.6625	11.281	0.945176	0.764887	0.881704
AT1G05970	2.82427	2.77566	1.01751	0.515407	0.722231
AT1G06010	5.45027	5.35049	1.01865	0.453615	0.671091
AT1G06050	2.18906	1.71654	1.27527	0.0721446	0.197317
AT1G06060	7.01842	7.42693	0.944997	0.893314	0.949577
AT1G06070	5.31162	5.21166	1.01918	0.295512	0.519445
AT1G06080	2.64969	3.2605	0.812666	0.277054	0.498935
AT1G06100	4.21067	5.57165	0.755732	0.134617	0.308364
AT1G06110	6.69517	6.88839	0.97195	0.54511	0.74266
AT1G06130	11.2601	13.3492	0.843503	0.154537	0.338414
AT1G06143	1.56918	1.85001	0.848202	0.557534	0.751329
AT1G06180	1.99548	2.27716	0.876298	0.799736	0.899111
AT1G06200	19.701	22.1878	0.887922	0.465061	0.680708
AT1G06210	8.88832	10.2496	0.867186	0.42761	0.650087
AT1G06230	9.87101	11.1313	0.886778	0.330438	0.557301
AT1G06240	9.23814	11.3794	0.811832	0.0746456	0.202468
AT1G06250	0.716454	1.03709	0.690831	0.219775	0.429211
AT1G06260	1.00298	1.60883	0.623422	0.114879	0.276463
AT1G06270	2.0705	2.21468	0.9349	0.949748	0.97863
AT1G06290	19.4579	18.7967	1.03518	0.0202599	0.074824
AT1G06350	0.713923	0.824603	0.865777	0.867272	0.936297
AT1G06360	42.6067	45.3651	0.939197	0.930192	0.969267
AT1G06380	4.97193	5.68594	0.874425	0.474108	0.687598
AT1G06400	16.2896	16.3927	0.993711	0.309968	0.534039
AT1G06410	26.2462	26.1724	1.00282	0.065052	0.183307
AT1G06420	2.05107	2.55878	0.801584	0.39035	0.615854
AT1G06430	22.6076	24.4383	0.92509	0.96961	0.986935
AT1G06440	1.00704	0.964914	1.04365	0.566982	0.758611
AT1G06470	8.7537	8.07236	1.0844	0.0204685	0.075384
AT1G06500	7.0848	7.26781	0.97482	0.621653	0.794597
AT1G06510	15.1685	16.6648	0.910215	0.775449	0.887342
AT1G06515	9.53677	10.0412	0.949767	0.931287	0.969814
AT1G06560	5.14582	5.30513	0.969972	0.669326	0.825378
AT1G06570	5.79502	5.88789	0.984227	0.55949	0.752386
AT1G06590	2.16068	2.2182	0.974069	0.662696	0.820921
AT1G06620	1.27037	1.04801	1.21217	0.20151	0.405228
AT1G06630	2.63188	2.94786	0.892809	0.687722	0.837667
AT1G06640	11.8831	13.8768	0.856326	0.342757	0.569983
AT1G06650	29.2885	30.16	0.971106	0.376231	0.602136
AT1G06660	1.15634	1.16122	0.995799	0.770885	0.884918
AT1G06700	18.8633	20.5124	0.919606	0.780521	0.890658
AT1G06710	0.866794	1.11345	0.778476	0.1957	0.39734
AT1G06730	6.28104	6.21851	1.01005	0.301341	0.525649
AT1G06740	1.01965	1.02981	0.990134	0.7749	0.887041
AT1G06760	124.377	126.965	0.979615	0.0791973	0.210971
AT1G06770	1.70597	2.31365	0.737353	0.0705167	0.194161
AT1G06780	3.60251	3.97583	0.906101	0.733599	0.864333
AT1G06790	3.98567	4.17697	0.954202	0.817833	0.908445
AT1G06800	3.00143	3.869	0.775764	0.106937	0.26262
AT1G06820	14.2372	16.6479	0.855198	0.0761572	0.20515
AT1G06850	3.63412	3.72717	0.975035	0.684248	0.835647
AT1G06870	7.44515	8.60668	0.865044	0.377734	0.603892
AT1G06890	27.4559	28.4779	0.964113	0.372601	0.598422
AT1G06900	10.942	10.8308	1.01026	0.0807438	0.214343
AT1G06950	67.696	70.1982	0.964355	0.172503	0.365301
AT1G06960	7.46777	8.05059	0.927605	0.951846	0.979373
AT1G06980	2.18311	1.83955	1.18676	0.222965	0.432762
AT1G07020	10.0057	10.0056	1.00001	0.556936	0.751023
AT1G07030	9.83903	8.87417	1.10873	0.0200214	0.0741878
AT1G07070	25.6702	25.1743	1.0197	0.239024	0.452682
AT1G07080	35.1006	36.2366	0.96865	0.475299	0.688654
AT1G07090	9.54002	9.59899	0.993857	0.475157	0.688524
AT1G07110	51.7731	58.2963	0.888101	0.143407	0.321936
AT1G07120	1.03347	1.23221	0.838713	0.635915	0.80335
AT1G07130	2.9952	2.91972	1.02585	0.618672	0.792416
AT1G07140	114.522	131.258	0.872494	0.0344303	0.113839
AT1G07170	5.21595	4.38792	1.18871	0.0411393	0.13035
AT1G07210	16.766	18.9987	0.882483	0.435613	0.656432
AT1G07220	6.28656	7.4982	0.83841	0.179675	0.375657
AT1G07230	10.737	10.5294	1.01972	0.148009	0.32899
AT1G07250	14.82	14.8695	0.996672	0.200377	0.404051
AT1G07270	0.73628	1.04039	0.707695	0.210917	0.418125
AT1G07280	35.1827	37.3055	0.943097	0.69987	0.845716
AT1G07300	1.51479	2.01813	0.750591	0.213836	0.42172
AT1G07320	256.982	265.784	0.966885	0.0863074	0.225021
AT1G07370	14.5849	14.904	0.978586	0.559356	0.752363
AT1G07380	1.97673	1.90741	1.03634	0.404737	0.62919
AT1G07400	0.962333	1.39359	0.690543	0.359591	0.585896
AT1G07410	1.68994	1.28653	1.31357	0.1463	0.326011
AT1G07430	0.84398	1.43517	0.588068	0.0436844	0.136484
AT1G07470	6.34608	5.92027	1.07192	0.118039	0.281728
AT1G07480	4.21134	4.25034	0.990824	0.488104	0.699594
AT1G07510	3.83181	3.91415	0.978963	0.334527	0.561472
AT1G07530	7.4373	7.89881	0.941572	0.834982	0.917693
AT1G07570	3.01012	3.22272	0.934031	0.965452	0.985582
AT1G07590	21.5996	25.1532	0.85872	0.256178	0.474573
AT1G07610	13.4022	15.8943	0.843208	0.321849	0.547322
AT1G07615	4.1956	3.78187	1.1094	0.104285	0.258291
AT1G07620	0.679328	1.25499	0.541301	0.0139738	0.0556335
AT1G07630	5.04862	5.94277	0.84954	0.243461	0.458448
AT1G07640	6.10931	7.04609	0.867051	0.231249	0.443054
AT1G07660	15.1523	18.7401	0.80855	0.0963233	0.244492
AT1G07700	19.6355	21.5307	0.911976	0.632525	0.801297
AT1G07705	7.76694	8.54971	0.908445	0.632395	0.801235
AT1G07725	3.19282	3.43301	0.930035	0.929124	0.968515
AT1G07740	0.947584	1.00158	0.946093	0.899236	0.953484
AT1G07745	1.79379	2.06157	0.870109	0.664321	0.822167
AT1G07780	3.26999	3.85483	0.848282	0.261682	0.480831
AT1G07810	7.62647	7.83121	0.973856	0.396196	0.620935
AT1G07820	55.7437	63.9379	0.87184	0.145381	0.324696
AT1G07830	9.69329	8.87911	1.0917	0.0934998	0.238728
AT1G07840	8.64868	11.1316	0.776947	0.0205577	0.0755416
AT1G07870	1.95116	2.42573	0.804358	0.271797	0.492319
AT1G07880	1.64194	2.20696	0.743983	0.187454	0.386437
AT1G07901	0.742219	0.962932	0.770791	0.765213	0.881783
AT1G07902	1.42207	1.39084	1.02245	0.821324	0.910276
AT1G07910	4.05705	4.32394	0.938276	0.909518	0.958671
AT1G07930	137.669	126.002	1.09259	0.0290729	0.0993828
AT1G07950	8.25686	7.92262	1.04219	0.21535	0.423446
AT1G07960	8.70469	10.8532	0.802037	0.0724865	0.197929
AT1G07970	4.31468	4.29089	1.00554	0.413821	0.637725
AT1G07990	8.57534	9.35678	0.916485	0.792949	0.896057
AT1G08000	3.42687	3.55198	0.964779	0.676503	0.830447
AT1G08010	6.94079	7.67299	0.904575	0.771735	0.88541
AT1G08030	4.20771	4.29963	0.978621	0.523748	0.727684
AT1G08050	2.04981	1.77345	1.15584	0.108567	0.265735
AT1G08060	2.38045	2.99333	0.795252	0.0270553	0.0941053
AT1G08125	7.06893	7.81684	0.904321	0.843328	0.921762
AT1G08130	9.66099	10.4325	0.926048	0.936545	0.972442
AT1G08160	4.12509	4.65164	0.886802	0.662498	0.820785
AT1G08165	1.16691	1.19659	0.975203	0.913599	0.961291
AT1G08180	2.12678	2.29574	0.926403	0.986958	0.994539
AT1G08190	28.3491	32.6069	0.869421	0.0968387	0.245281
AT1G08210	4.86276	4.73839	1.02625	0.329669	0.556283
AT1G08220	2.51316	2.80592	0.895664	0.815333	0.906868
AT1G08230	1.44264	2.09864	0.687417	0.0164456	0.063342
AT1G08280	2.8123	3.29811	0.852702	0.413785	0.637725
AT1G08315	3.96745	4.53873	0.874133	0.577082	0.765549
AT1G08350	2.38026	2.50695	0.949464	0.864617	0.934994
AT1G08360	154.268	159.824	0.965238	0.264686	0.484401
AT1G08370	8.55168	9.27707	0.921808	0.910147	0.958972
AT1G08390	2.26828	1.56992	1.44483	0.0751924	0.203457
AT1G08400	1.52836	1.44561	1.05725	0.399884	0.624094
AT1G08410	5.50962	5.76211	0.956182	0.750318	0.87355
AT1G08420	15.9721	16.1424	0.989446	0.143724	0.322323
AT1G08450	55.3674	56.6892	0.976683	0.0870164	0.226342
AT1G08460	5.90108	5.73584	1.02881	0.148986	0.330593
AT1G08465	9.11657	9.73101	0.936858	0.997526	0.998715
AT1G08470	11.501	14.2682	0.806061	0.0394262	0.126174
AT1G08490	22.2064	21.3708	1.0391	0.0233485	0.0834948
AT1G08500	1.67605	1.41394	1.18538	0.307723	0.532009
AT1G08530	7.54514	9.00278	0.83809	0.241259	0.45563
AT1G08540	61.3327	62.7099	0.978039	0.143701	0.322323
AT1G08550	42.1212	43.2579	0.973722	0.191845	0.392129
AT1G08560	13.2049	12.4462	1.06096	0.0880206	0.228177
AT1G08570	24.0995	27.8222	0.866195	0.204076	0.408712
AT1G08580	24.3669	25.13	0.969634	0.639238	0.805108
AT1G08590	0.955168	1.38645	0.688931	0.0334125	0.111218
AT1G08610	2.82955	2.59583	1.09004	0.221404	0.430827
AT1G08620	4.22603	4.72792	0.893846	0.587189	0.772114
AT1G08640	36.5252	39.9866	0.913436	0.889403	0.947038
AT1G08660	10.4855	12.293	0.852965	0.132956	0.305853
AT1G08680	6.92358	7.00912	0.987796	0.370869	0.596723
AT1G08700	8.99453	9.14606	0.983432	0.50874	0.716476
AT1G08710	3.16581	3.47097	0.912082	0.870951	0.937899
AT1G08720	4.42045	4.55126	0.971258	0.491691	0.702878
AT1G08750	4.71068	4.72357	0.997272	0.52074	0.726268
AT1G08760	4.26956	4.93016	0.866009	0.352465	0.579469
AT1G08770	7.85088	8.85041	0.887064	0.549941	0.746513
AT1G08780	14.3074	15.6678	0.913173	0.902905	0.956081
AT1G08800	1.94446	2.57897	0.753967	0.0257821	0.0905392
AT1G08810	5.63704	5.98695	0.941554	0.977332	0.990724
AT1G08820	7.45184	8.94286	0.833272	0.0951155	0.242051
AT1G08840	1.109	1.29538	0.85612	0.541043	0.73964
AT1G08845	2.93387	3.30152	0.888641	0.746136	0.871339
AT1G08880	57.6562	58.3458	0.98818	0.124381	0.292131
AT1G08900	6.43901	5.7096	1.12775	0.0269403	0.093801
AT1G08910	3.72123	4.3119	0.863013	0.444004	0.663537
AT1G08920	3.33023	2.83416	1.17503	0.0425151	0.133523
AT1G08940	2.13315	2.0853	1.02294	0.606271	0.785216
AT1G08960	3.65178	4.2644	0.856341	0.323383	0.548986
AT1G08970	12.4389	11.78	1.05594	0.0524204	0.156748
AT1G09000	1.45969	1.68221	0.86772	0.66113	0.819906
AT1G09020	18.5619	18.7634	0.98926	0.141537	0.319037
AT1G09040	1.14974	1.18488	0.970338	0.837407	0.918823
AT1G09050	1.02723	1.06408	0.965368	0.77375	0.88617
AT1G09060	7.91241	8.96213	0.882871	0.404229	0.62883
AT1G09070	28.8168	33.3727	0.863482	0.0836322	0.2197
AT1G09100	9.8437	11.2853	0.872257	0.381093	0.607364
AT1G09150	15.3038	14.8292	1.032	0.187212	0.385985
AT1G09160	9.87909	11.3757	0.868435	0.238994	0.452682
AT1G09180	0.915098	1.37594	0.665073	0.230366	0.442096
AT1G09190	2.21446	2.21592	0.999342	0.62449	0.796253
AT1G09195	1.88907	2.64007	0.715538	0.0218506	0.0793616
AT1G09200	110.783	124.996	0.886293	0.166716	0.357192
AT1G09230	3.99849	3.41045	1.17243	0.0532754	0.15857
AT1G09240	4.61784	4.94786	0.9333	0.810459	0.904519
AT1G09250	11.1105	10.0774	1.10252	0.0347496	0.114556
AT1G09270	19.8557	19.1669	1.03594	0.0177943	0.0674689
AT1G09280	4.55892	4.31279	1.05707	0.204071	0.408712
AT1G09290	5.30079	5.1155	1.03622	0.359608	0.585896
AT1G09300	2.63504	2.76529	0.9529	0.882822	0.94372
AT1G09320	3.25299	2.7686	1.17496	0.0429879	0.134657
AT1G09330	12.5789	14.2208	0.88454	0.436552	0.657413
AT1G09390	3.40948	2.86156	1.19148	0.0388278	0.124672
AT1G09415	15.9166	17.0081	0.935828	0.927365	0.968136
AT1G09420	7.69436	9.06348	0.848941	0.0475296	0.145253
AT1G09440	3.06237	3.59266	0.852398	0.453754	0.671238
AT1G09450	1.24144	1.26815	0.978939	0.767192	0.882973
AT1G09460	0.813839	0.599704	1.35707	0.220287	0.429548
AT1G09470	2.25585	2.97802	0.757501	0.165115	0.354666
AT1G09480	0.802528	0.899466	0.892227	0.833156	0.917138
AT1G09490	13.6166	15.6589	0.869572	0.352181	0.579254
AT1G09500	1.5395	1.7513	0.879061	0.825641	0.913026
AT1G09520	6.54325	5.70833	1.14626	0.0656075	0.184393
AT1G09530	2.71821	2.43774	1.11506	0.0857527	0.223992
AT1G09560	16.0245	18.594	0.861809	0.264081	0.483668
AT1G09580	7.22813	7.26077	0.995504	0.582644	0.768906
AT1G09590	115.046	128.011	0.898719	0.367318	0.592941
AT1G09630	13.4795	13.6828	0.985141	0.431418	0.653807
AT1G09640	85.087	85.4656	0.99557	0.0279878	0.0967475
AT1G09645	9.7861	9.12701	1.07221	0.243552	0.458464
AT1G09660	18.8896	18.715	1.00933	0.208579	0.414958
AT1G09690	194.618	194.576	1.00022	0.0134187	0.053819
AT1G09700	4.2579	5.14653	0.827334	0.261067	0.480186
AT1G09710	1.9688	2.08258	0.945365	0.967881	0.986659
AT1G09730	6.19229	7.47458	0.828446	0.0712863	0.195606
AT1G09740	5.62522	5.49716	1.0233	0.4405	0.660973
AT1G09760	20.6569	23.0237	0.897203	0.580322	0.767471
AT1G09770	23.9168	24.5066	0.975933	0.257582	0.476123
AT1G09794	2.48845	2.37192	1.04913	0.575184	0.764426
AT1G09795	66.2846	76.0087	0.872066	0.114811	0.276373
AT1G09800	3.03671	3.43882	0.883067	0.817163	0.908078
AT1G09810	3.3231	3.80129	0.874204	0.500424	0.709046
AT1G09812	1.02192	1.3853	0.737686	0.307021	0.531198
AT1G09815	17.9084	17.7962	1.00631	0.34715	0.574015
AT1G09820	1.61006	2.0922	0.769554	0.165033	0.35462
AT1G09830	18.6387	19.8167	0.940555	0.752331	0.874984
AT1G09850	17.0862	17.1232	0.997841	0.128752	0.299133
AT1G09870	8.39549	8.4278	0.996166	0.350456	0.577378
AT1G09900	11.3476	12.5568	0.903707	0.643134	0.808091
AT1G09910	2.55842	2.1503	1.18979	0.0177332	0.0672828
AT1G09920	15.4306	17.2448	0.894797	0.648302	0.811377
AT1G09940	7.82011	8.03938	0.972726	0.498157	0.707271
AT1G09960	1.50526	1.78596	0.842829	0.530465	0.732695
AT1G09980	5.728	6.54808	0.87476	0.362605	0.588728
AT1G09995	0.760674	0.764552	0.994927	0.713313	0.853607
AT1G10020	11.8402	11.764	1.00648	0.28967	0.512801
AT1G10030	6.36545	6.55811	0.970623	0.734711	0.864793
AT1G10040	1.16269	1.53148	0.759193	0.284209	0.506978
AT1G10050	3.13533	3.13892	0.998855	0.437551	0.657989
AT1G10095	1.25597	1.14592	1.09604	0.288635	0.511715
AT1G10110	3.08445	3.4015	0.90679	0.561309	0.753904
AT1G10120	5.83473	6.8245	0.854968	0.2483	0.464747
AT1G10130	8.85344	8.715	1.01588	0.118571	0.282674
AT1G10140	1.27132	0.731737	1.73741	0.0198976	0.0739084
AT1G10180	5.43041	5.56619	0.975606	0.576082	0.764936
AT1G10210	2.76505	2.6631	1.03828	0.380489	0.606737
AT1G10230	13.6764	11.6563	1.17331	0.0502237	0.151583
AT1G10240	2.1206	2.19308	0.966949	0.778572	0.889245
AT1G10270	4.58838	4.01753	1.14209	0.0162215	0.0625791
AT1G10280	2.27569	2.74816	0.828076	0.35483	0.581612
AT1G10310	15.6852	15.998	0.980444	0.435542	0.656432
AT1G10350	6.89788	6.98433	0.987622	0.421708	0.644762
AT1G10360	34.485	40.9203	0.842736	0.0374915	0.121614
AT1G10410	6.9658	7.09136	0.982294	0.464354	0.680088
AT1G10430	13.5414	15.6862	0.863267	0.270513	0.490818
AT1G10450	3.68997	4.44435	0.830261	0.114518	0.275832
AT1G10460	1.02572	1.17415	0.87359	0.822788	0.911365
AT1G10470	49.5881	49.5296	1.00118	0.0205867	0.0756151
AT1G10490	7.21054	8.72152	0.826753	0.0345625	0.114175
AT1G10500	35.8333	37.5793	0.953539	0.567395	0.758763
AT1G10510	23.3758	27.1778	0.860104	0.0898256	0.231595
AT1G10570	4.31993	4.90133	0.881378	0.585584	0.771151
AT1G10580	16.928	17.118	0.988901	0.188369	0.387768
AT1G10600	7.48585	6.51535	1.14896	0.0349965	0.115247
AT1G10610	2.27459	2.29623	0.99058	0.659374	0.818455
AT1G10630	29.0916	28.5077	1.02048	0.0542731	0.16077
AT1G10640	7.6138	9.41387	0.808785	0.03489	0.114951
AT1G10657	6.16256	7.40373	0.832358	0.265573	0.485654
AT1G10660	9.10706	10.2003	0.892824	0.547882	0.744866
AT1G10690	1.65709	1.53968	1.07626	0.640528	0.805963
AT1G10720	8.00098	8.6451	0.925493	0.959941	0.983095
AT1G10730	2.0205	2.19011	0.922557	0.904852	0.957177
AT1G10740	7.43232	8.70495	0.853804	0.258551	0.477073
AT1G10780	2.40745	2.54843	0.944681	0.970376	0.987164
AT1G10820	6.42819	8.4405	0.761589	0.0195683	0.0728798
AT1G10830	14.2953	15.8436	0.902275	0.591752	0.775164
AT1G10840	40.3764	41.3723	0.975926	0.260554	0.479558
AT1G10850	6.27339	7.23164	0.867491	0.347411	0.574333
AT1G10865	8.07742	6.88367	1.17342	0.0606788	0.174632
AT1G10900	3.74383	3.94313	0.949458	0.751924	0.874632
AT1G10910	11.9942	13.8107	0.868467	0.20247	0.406563
AT1G10930	5.93835	6.27398	0.946504	0.800306	0.899396
AT1G10940	23.4939	24.8966	0.943658	0.686712	0.836922
AT1G10950	41.8069	41.6157	1.00459	0.0180286	0.0681572
AT1G10960	295.979	340.297	0.869766	0.0337667	0.112111
AT1G10970	2.47489	2.76871	0.89388	0.764515	0.881704
AT1G10990	2.08979	1.68361	1.24126	0.191135	0.391478
AT1G11000	1.79786	2.31193	0.777644	0.185843	0.384062
AT1G11020	5.19516	5.28864	0.982325	0.563999	0.756307
AT1G11050	3.75722	3.35319	1.12049	0.0711755	0.195439
AT1G11060	3.17953	2.92712	1.08623	0.0993399	0.249807
AT1G11080	1.0167	0.753538	1.34924	0.0921989	0.236081
AT1G11090	7.13821	7.78846	0.91651	0.904384	0.957019
AT1G11120	1.69621	2.04435	0.829708	0.608641	0.786549
AT1G11130	6.12714	6.53307	0.937866	0.858598	0.931303
AT1G11180	7.12726	6.40455	1.11284	0.0609684	0.175217
AT1G11190	1.3068	1.50101	0.870615	0.724918	0.860107
AT1G11200	7.18729	7.32307	0.981458	0.537368	0.737745
AT1G11220	1.93186	1.45823	1.3248	0.0710416	0.19519
AT1G11240	8.49457	9.12544	0.930867	0.954073	0.980333
AT1G11270	1.00075	0.919014	1.08894	0.486161	0.698103
AT1G11280	5.02709	6.20678	0.809936	0.0521532	0.156116
AT1G11290	2.27699	2.0886	1.0902	0.197853	0.400209
AT1G11310	42.6775	46.1556	0.924645	0.997937	0.998948
AT1G11320	2.12621	2.08442	1.02005	0.524576	0.728186
AT1G11330	12.4071	13.7877	0.899867	0.746418	0.871426
AT1G11350	10.0456	11.6748	0.860456	0.176325	0.370778
AT1G11360	10.7249	11.1709	0.960078	0.671224	0.826855
AT1G11380	5.15121	5.52548	0.932265	0.917576	0.963471
AT1G11390	4.72729	5.0385	0.938234	0.948011	0.978117
AT1G11400	4.15805	4.35441	0.954906	0.749079	0.872833
AT1G11420	1.31673	1.35904	0.968875	0.827918	0.914265
AT1G11440	7.07537	7.56824	0.934876	0.898497	0.953082
AT1G11475	22.9587	24.8728	0.923043	0.878155	0.941406
AT1G11480	12.3028	12.9065	0.953227	0.62837	0.798926
AT1G11545	23.622	25.3908	0.930338	0.725706	0.860371
AT1G11580	16.2917	18.0054	0.904825	0.574614	0.763953
AT1G11591	2.99315	3.18602	0.939465	0.955731	0.980906
AT1G11600	6.88889	6.93784	0.992944	0.366243	0.5919
AT1G11630	3.34797	4.55847	0.734449	0.0391104	0.125412
AT1G11650	102.34	108.734	0.941194	0.660687	0.81962
AT1G11670	2.76609	3.28073	0.843134	0.347004	0.573999
AT1G11680	29.1431	29.3187	0.994011	0.146378	0.326141
AT1G11700	20.2302	23.4007	0.864512	0.394899	0.620175
AT1G11710	0.820276	1.11391	0.736395	0.232653	0.444728
AT1G11730	0.937127	1.24093	0.755184	0.346277	0.573418
AT1G11750	66.7278	68.2156	0.97819	0.122687	0.289561
AT1G11755	4.75432	4.9365	0.963097	0.810023	0.904387
AT1G11760	3.85126	3.64648	1.05616	0.468579	0.683416
AT1G11780	4.8638	5.34334	0.910254	0.794638	0.896559
AT1G11790	15.0139	17.6499	0.850653	0.166061	0.356241
AT1G11800	4.23241	4.46189	0.948568	0.836128	0.918156
AT1G11850	76.6048	76.1679	1.00574	0.391834	0.617375
AT1G11870	12.9608	12.4068	1.04466	0.0581556	0.169344
AT1G11880	2.54539	2.94473	0.86439	0.538295	0.738063
AT1G11890	24.6575	26.345	0.935947	0.889895	0.947322
AT1G11900	1.56144	1.51417	1.03122	0.663937	0.821997
AT1G11905	6.17365	6.4821	0.952415	0.811631	0.904907
AT1G11930	36.4403	35.1315	1.03726	0.0269508	0.093801
AT1G11940	2.24367	2.46071	0.911797	0.867405	0.936352
AT1G11950	1.81862	2.01564	0.902253	0.725002	0.860107
AT1G11960	3.65029	4.04327	0.902808	0.723807	0.859489
AT1G12000	29.073	31.1397	0.933633	0.907561	0.958176
AT1G12010	0.704853	0.865757	0.814146	0.784296	0.892337
AT1G12020	3.46492	3.32122	1.04327	0.313594	0.538574
AT1G12050	16.6972	15.6282	1.06841	0.016059	0.0620094
AT1G12060	5.76922	5.7756	0.998894	0.520994	0.7264
AT1G12100	1.09193	0.763392	1.43037	0.391287	0.616868
AT1G12120	17.321	17.8637	0.969618	0.528584	0.731311
AT1G12140	15.0259	16.9663	0.885628	0.299424	0.523283
AT1G12200	1.8821	2.29964	0.818432	0.411207	0.635272
AT1G12220	1.56236	1.58478	0.985853	0.347573	0.574378
AT1G12230	33.8762	35.2841	0.960098	0.649425	0.812048
AT1G12240	46.8881	47.3677	0.989875	0.0311922	0.105225
AT1G12244	8.18497	8.78506	0.931692	0.999713	0.999813
AT1G12270	17.6355	19.0636	0.925084	0.905796	0.957687
AT1G12280	4.48501	5.56709	0.80563	0.0899615	0.231813
AT1G12320	2.72746	2.43009	1.12237	0.0891183	0.230205
AT1G12330	17.8658	20.5039	0.871335	0.124569	0.292449
AT1G12340	2.73448	3.22417	0.848117	0.452378	0.66997
AT1G12350	15.292	14.0847	1.08572	0.0383092	0.123589
AT1G12370	1.81015	2.28788	0.791191	0.29251	0.515708
AT1G12380	3.81421	4.33325	0.88022	0.560595	0.753367
AT1G12390	2.49595	3.06549	0.814208	0.635983	0.803375
AT1G12400	2.98402	3.99635	0.746687	0.196329	0.398093
AT1G12430	8.59013	10.1898	0.843015	0.0763726	0.205558
AT1G12440	20.6797	23.7999	0.868899	0.156691	0.341819
AT1G12450	3.65406	3.29142	1.11018	0.15281	0.336058
AT1G12460	5.02822	5.3408	0.941474	0.918882	0.964183
AT1G12480	2.67598	2.75484	0.971374	0.782183	0.891428
AT1G12500	18.9416	20.9911	0.902362	0.373385	0.599222
AT1G12530	7.05434	7.21947	0.977127	0.671982	0.827195
AT1G12550	4.18944	5.56036	0.753447	0.0616439	0.176491
AT1G12570	4.91146	5.02458	0.977488	0.623364	0.79553
AT1G12580	7.5099	9.01807	0.832762	0.111629	0.270817
AT1G12620	1.4634	1.60224	0.913346	0.927774	0.96825
AT1G12640	10.4938	12.2562	0.856205	0.228883	0.440403
AT1G12680	6.52148	6.50558	1.00244	0.33982	0.567257
AT1G12700	0.797002	1.07235	0.743232	0.264255	0.483877
AT1G12730	2.58245	2.54504	1.0147	0.459821	0.675808
AT1G12760	18.7052	18.1805	1.02886	0.0474299	0.145054
AT1G12775	1.13867	1.17983	0.965111	0.824832	0.912666
AT1G12790	1.26835	1.26046	1.00626	0.764729	0.881704
AT1G12800	78.2035	84.0922	0.929973	0.956141	0.981088
AT1G12810	12.8815	13.7457	0.937126	0.982932	0.993051
AT1G12820	15.7208	15.9356	0.986519	0.2239	0.433924
AT1G12840	51.594	54.2459	0.951113	0.400145	0.624269
AT1G12850	14.7656	14.0403	1.05166	0.0287714	0.0986843
AT1G12860	14.2425	13.4094	1.06213	0.0266825	0.0930397
AT1G12880	2.54259	3.83034	0.663803	0.0338844	0.112388
AT1G12900	1074.99	1100.65	0.976687	0.0133291	0.0535236
AT1G12910	8.48113	8.34108	1.01679	0.352712	0.57973
AT1G12920	40.8216	42.4044	0.962674	0.371779	0.597586
AT1G12930	4.54097	5.50531	0.824834	0.1025	0.255383
AT1G12970	2.69262	2.78137	0.968091	0.725835	0.860371
AT1G12990	12.5491	11.9314	1.05177	0.0624142	0.177949
AT1G13000	5.96603	6.06045	0.98442	0.565535	0.757604
AT1G13020	16.6761	20.4971	0.813586	0.0186932	0.0702661
AT1G13030	3.66748	3.99988	0.916898	0.833511	0.917181
AT1G13040	1.19168	1.45908	0.816735	0.434877	0.656417
AT1G13050	1.33539	1.11032	1.2027	0.222134	0.431798
AT1G13060	40.2431	43.9695	0.91525	0.767668	0.883328
AT1G13080	4.32326	5.21353	0.829239	0.247775	0.464073
AT1G13090	24.725	25.2432	0.97947	0.234527	0.447343
AT1G13100	2.53611	3.16121	0.80226	0.253818	0.471293
AT1G13110	36.5991	37.9021	0.965621	0.423706	0.64661
AT1G13120	5.29126	6.68893	0.791047	0.0332747	0.110847
AT1G13160	8.63618	9.86189	0.875713	0.276771	0.498532
AT1G13170	7.47255	8.94235	0.835636	0.109173	0.266745
AT1G13180	3.64863	3.63321	1.00425	0.510361	0.717557
AT1G13190	13.1572	12.5293	1.05011	0.0379008	0.122578
AT1G13195	2.19605	2.73253	0.803668	0.327177	0.553246
AT1G13250	11.9271	11.9734	0.996131	0.334125	0.56102
AT1G13270	53.7465	57.5473	0.933953	0.858154	0.931151
AT1G13280	21.8921	25.2174	0.868133	0.186895	0.385521
AT1G13320	20.2533	23.2803	0.869974	0.130439	0.301924
AT1G13330	1.24989	1.39403	0.896604	0.876019	0.94024
AT1G13360	21.572	25.2976	0.852726	0.124845	0.292892
AT1G13380	14.1182	14.5427	0.970811	0.680676	0.832951
AT1G13390	5.84532	6.95579	0.840354	0.268691	0.488961
AT1G13410	1.09545	1.167	0.938695	0.970333	0.987164
AT1G13440	426.074	486.066	0.876575	0.0129327	0.0521813
AT1G13450	4.28274	4.47993	0.955983	0.760154	0.879746
AT1G13460	4.93388	6.1584	0.801163	0.114424	0.275685
AT1G13470	39.8637	45.2859	0.880268	0.028017	0.0967887
AT1G13560	21.6543	25.5577	0.847273	0.044323	0.137913
AT1G13570	2.58951	2.42943	1.06589	0.283647	0.506302
AT1G13580	3.07227	3.04185	1.01	0.547412	0.744407
AT1G13609	1.1591	1.64103	0.706321	0.512076	0.719064
AT1G13640	16.3451	19.0735	0.856955	0.142944	0.321174
AT1G13650	7.449	7.3085	1.01922	0.360852	0.58726
AT1G13690	14.6223	14.0299	1.04222	0.183573	0.381198
AT1G13740	5.06264	5.92509	0.854442	0.342546	0.56988
AT1G13750	7.53453	7.40628	1.01732	0.201774	0.405455
AT1G13770	3.9125	4.55611	0.858736	0.479201	0.692301
AT1G13780	1.6351	1.73083	0.944695	0.950638	0.97885
AT1G13790	1.60079	2.15881	0.741517	0.0645002	0.182287
AT1G13810	2.76398	3.48684	0.792688	0.252688	0.470078
AT1G13870	7.91749	9.43328	0.839315	0.267042	0.487439
AT1G13880	7.20972	8.23675	0.875311	0.36231	0.588606
AT1G13900	9.49461	10.5007	0.904188	0.591997	0.7754
AT1G13910	1.95829	2.02863	0.965328	0.884211	0.944565
AT1G13940	2.4842	2.51801	0.986572	0.535706	0.736481
AT1G13950	3.72525	5.00588	0.744175	0.161029	0.34888
AT1G13960	4.58424	4.93788	0.928381	0.976116	0.989948
AT1G13980	6.22452	6.30749	0.986845	0.286548	0.509529
AT1G14000	24.0634	27.1396	0.886652	0.325068	0.551011
AT1G14010	16.7924	19.0918	0.87956	0.555921	0.750456
AT1G14020	7.76158	8.19646	0.946944	0.835946	0.918156
AT1G14040	1.33598	1.82191	0.733285	0.0626237	0.17831
AT1G14060	7.11131	7.54653	0.942329	0.808537	0.903824
AT1G14130	2.82102	2.71073	1.04069	0.437099	0.657784
AT1G14140	8.24714	7.97861	1.03366	0.257947	0.476377
AT1G14180	2.85499	2.86601	0.996155	0.614139	0.789628
AT1G14190	0.728536	0.777936	0.936498	0.985226	0.993736
AT1G14200	6.63718	7.05791	0.940388	0.864848	0.935008
AT1G14210	7.18946	6.34234	1.13357	0.0824203	0.217521
AT1G14230	6.05312	5.66403	1.0687	0.103014	0.256045
AT1G14270	28.7257	31.0825	0.924176	0.886663	0.945983
AT1G14280	7.16263	9.15354	0.782499	0.0207887	0.0762622
AT1G14290	6.03975	6.68781	0.903098	0.58004	0.767279
AT1G14300	5.11324	5.06348	1.00983	0.450496	0.668708
AT1G14310	8.31878	8.32224	0.999584	0.412563	0.636487
AT1G14330	3.89604	4.11536	0.946707	0.961414	0.983673
AT1G14340	8.29416	7.40636	1.11987	0.0523708	0.156683
AT1G14380	7.84178	9.63972	0.813487	0.0336025	0.111718
AT1G14410	20.2483	20.5912	0.98335	0.317961	0.543297
AT1G14430	2.21335	2.92265	0.757307	0.124357	0.292131
AT1G14450	5.81592	4.60131	1.26397	0.0535278	0.159068
AT1G14510	15.1971	14.2718	1.06483	0.0240936	0.0856666
AT1G14520	2.77218	3.11963	0.888625	0.578294	0.766037
AT1G14530	2.37192	2.83728	0.835983	0.421008	0.644234
AT1G14560	4.35698	5.32289	0.818537	0.180134	0.376337
AT1G14570	16.1389	18.6578	0.864995	0.166898	0.357444
AT1G14590	5.1031	5.7441	0.888407	0.675075	0.829483
AT1G14600	1.2979	1.59587	0.81329	0.542663	0.740789
AT1G14620	9.40956	10.6083	0.887	0.603463	0.783816
AT1G14630	1.81669	1.99702	0.909699	0.855771	0.929891
AT1G14640	0.982496	1.30193	0.754649	0.211656	0.419045
AT1G14642	1.15248	1.1086	1.03959	0.904693	0.957068
AT1G14660	1.46427	1.56356	0.936493	0.993832	0.997759
AT1G14670	45.4272	51.8318	0.876434	0.0785545	0.209791
AT1G14680	0.993329	1.31132	0.757502	0.395538	0.620293
AT1G14685	10.6332	9.85402	1.07908	0.0218571	0.0793616
AT1G14687	1.99726	1.69543	1.17803	0.319925	0.545668
AT1G14690	8.08373	9.85343	0.820397	0.040719	0.129335
AT1G14720	25.5969	24.5499	1.04264	0.0396651	0.126773
AT1G14730	1.00646	1.2284	0.819328	0.567761	0.758868
AT1G14770	1.83729	2.67567	0.686664	0.0214534	0.078183
AT1G14790	4.38307	5.17518	0.84694	0.201155	0.404881
AT1G14820	8.5751	10.0623	0.852198	0.261297	0.480451
AT1G14900	9.78615	10.9256	0.895709	0.615456	0.790474
AT1G14910	12.4212	12.3081	1.0092	0.156891	0.342086
AT1G14970	1.92035	2.16815	0.88571	0.754194	0.875998
AT1G14980	48.4936	56.3694	0.860281	0.128704	0.299062
AT1G14990	6.52897	7.9292	0.823408	0.313573	0.538574
AT1G15000	11.0393	11.9662	0.922548	0.887642	0.946291
AT1G15020	3.92886	3.59918	1.0916	0.100112	0.251297
AT1G15030	11.8453	13.174	0.899139	0.643369	0.808146
AT1G15060	7.04908	8.3324	0.845985	0.208034	0.414254
AT1G15080	2.12917	2.08087	1.02322	0.60738	0.785865
AT1G15085	5.1183	5.43851	0.941123	0.964742	0.985157
AT1G15100	7.95687	10.609	0.750011	0.0547731	0.161938
AT1G15110	1.33626	1.82367	0.732728	0.134407	0.308051
AT1G15120	47.7766	50.9352	0.937988	0.787768	0.893868
AT1G15160	1.97912	2.88655	0.685635	0.0440469	0.137308
AT1G15165	3.90586	4.69354	0.832177	0.491866	0.702878
AT1G15170	3.00128	2.7504	1.09122	0.217293	0.426037
AT1G15180	7.62477	9.12801	0.835316	0.237391	0.450962
AT1G15215	3.08587	3.42876	0.899998	0.763139	0.881147
AT1G15220	2.77125	2.79281	0.992281	0.630553	0.800369
AT1G15230	11.7208	10.9734	1.0681	0.0584932	0.17018
AT1G15240	5.35259	5.75861	0.929494	0.980107	0.992106
AT1G15250	15.2734	13.9812	1.09242	0.0746673	0.202468
AT1G15270	144.792	146.548	0.988016	0.132128	0.30449
AT1G15280	14.2621	16.4048	0.869383	0.242712	0.457551
AT1G15310	1.1745	1.38601	0.847397	0.583242	0.769455
AT1G15350	3.46927	3.22704	1.07506	0.239711	0.453625
AT1G15370	16.8048	19.6308	0.856043	0.282093	0.50448
AT1G15390	21.0834	19.5157	1.08033	0.0195101	0.0727104
AT1G15400	13.9077	14.5969	0.952785	0.679702	0.832265
AT1G15420	8.94649	9.14456	0.97834	0.549827	0.746422
AT1G15430	2.30935	2.41815	0.955006	0.872196	0.938295
AT1G15470	9.57822	10.8562	0.882282	0.567382	0.758763
AT1G15480	4.24699	3.76382	1.12837	0.0632316	0.17946
AT1G15490	3.0318	3.40627	0.890063	0.715924	0.855104
AT1G15510	4.44274	5.49424	0.808618	0.110114	0.268381
AT1G15530	5.79031	5.4308	1.0662	0.112264	0.271924
AT1G15550	2.36003	2.00949	1.17444	0.20298	0.407294
AT1G15570	4.51471	4.8618	0.928607	0.99727	0.99869
AT1G15580	1.14465	0.933444	1.22627	0.377293	0.60336
AT1G15660	5.30049	5.5727	0.951154	0.86096	0.932763
AT1G15700	1.74261	2.19591	0.793571	0.386072	0.611979
AT1G15710	8.99447	11.1062	0.80986	0.0757556	0.204492
AT1G15720	0.917554	1.14941	0.798281	0.593684	0.77646
AT1G15760	0.978982	1.3999	0.699321	0.247566	0.463889
AT1G15780	5.45509	6.36832	0.856598	0.181727	0.37855
AT1G15790	1.77187	2.30905	0.76736	0.285094	0.507912
AT1G15800	2.35118	1.6655	1.4117	0.0255499	0.0897991
AT1G15810	10.5962	12.4753	0.849373	0.17386	0.367203
AT1G15860	14.7588	13.6324	1.08262	0.0631922	0.179406
AT1G15870	2.44347	2.2609	1.08075	0.569419	0.760358
AT1G15880	7.77131	8.5533	0.908575	0.982773	0.993051
AT1G15885	2.96369	2.23575	1.32559	0.0791477	0.210922
AT1G15910	7.74086	9.51267	0.813743	0.0318668	0.107065
AT1G15920	3.95291	4.01393	0.984797	0.618666	0.792416
AT1G15950	15.8503	16.9309	0.936172	0.744849	0.871093
AT1G15960	1.10081	1.40608	0.782891	0.245301	0.460673
AT1G15970	8.26357	8.11062	1.01886	0.253712	0.471199
AT1G16000	21.7289	20.5008	1.05991	0.140294	0.317301
AT1G16010	13.3976	13.7632	0.973438	0.468323	0.683165
AT1G16020	7.4727	9.31564	0.802168	0.0244324	0.0865415
AT1G16030	1.52239	1.54955	0.982473	0.65224	0.814186
AT1G16040	3.27321	3.49989	0.935233	0.921638	0.965671
AT1G16080	118.851	125.433	0.947524	0.546413	0.743769
AT1G16090	1.57237	2.59731	0.605384	0.0142149	0.0563601
AT1G16110	2.04404	2.38721	0.856246	0.435597	0.656432
AT1G16170	6.28301	6.08	1.03339	0.486941	0.698726
AT1G16190	7.36791	8.0937	0.910327	0.717911	0.856326
AT1G16210	28.8944	31.3353	0.922102	0.954842	0.980473
AT1G16220	1.85467	1.84793	1.00365	0.592209	0.775496
AT1G16240	18.9587	19.0317	0.996167	0.249139	0.46576
AT1G16250	2.31442	2.14778	1.07758	0.257269	0.475805
AT1G16270	3.92255	4.07792	0.9619	0.554926	0.750238
AT1G16280	3.92771	4.22293	0.930092	0.924106	0.966885
AT1G16300	1.80619	2.08011	0.868313	0.69677	0.843245
AT1G16310	1.20922	1.15529	1.04668	0.519377	0.725251
AT1G16330	1.03978	1.0899	0.95401	0.908177	0.958305
AT1G16340	8.3946	8.3618	1.00392	0.359489	0.585896
AT1G16390	1.84536	2.42617	0.760609	0.1493	0.330944
AT1G16400	2.51619	3.09997	0.811679	0.224807	0.435331
AT1G16410	48.8388	49.889	0.97895	0.16563	0.355504
AT1G16430	4.79529	4.15166	1.15503	0.143709	0.322323
AT1G16445	2.97881	2.31782	1.28518	0.0757254	0.204475
AT1G16470	31.4915	30.7706	1.02343	0.0358009	0.117127
AT1G16490	1.15828	1.34268	0.862664	0.701321	0.846435
AT1G16510	2.23445	2.70195	0.826976	0.532225	0.733797
AT1G16520	9.85316	12.5121	0.78749	0.0328492	0.109709
AT1G16530	1.45168	1.4679	0.988947	0.762321	0.880565
AT1G16540	1.41518	1.7587	0.804677	0.306117	0.530399
AT1G16560	18.0311	20.4895	0.880014	0.272021	0.492619
AT1G16570	4.44847	4.61756	0.963381	0.685552	0.836237
AT1G16590	2.91011	3.37802	0.861483	0.472254	0.686272
AT1G16630	2.91389	2.83057	1.02944	0.341523	0.568968
AT1G16640	1.23832	1.51369	0.818081	0.666184	0.822776
AT1G16650	1.90891	1.91817	0.995173	0.61718	0.791541
AT1G16670	5.7536	5.68685	1.01174	0.3421	0.569476
AT1G16680	6.44725	8.09737	0.796216	0.0276671	0.0958954
AT1G16690	3.29971	3.56876	0.92461	0.940506	0.974151
AT1G16700	28.2541	28.8409	0.979654	0.254624	0.472567
AT1G16710	3.71466	4.19177	0.886181	0.418404	0.642195
AT1G16730	1.43554	1.44173	0.995709	0.710144	0.851878
AT1G16740	21.8419	22.3411	0.977653	0.533821	0.734912
AT1G16750	4.66093	5.55255	0.839421	0.275282	0.496869
AT1G16780	5.64833	6.39335	0.883471	0.467534	0.682733
AT1G16800	0.982155	1.13754	0.863403	0.455472	0.67256
AT1G16810	35.5453	35.1748	1.01053	0.121645	0.287999
AT1G16825	2.33435	2.19169	1.06509	0.443768	0.663361
AT1G16830	0.844862	0.806928	1.04701	0.665559	0.822666
AT1G16850	8.10909	10.1095	0.802123	0.177037	0.371717
AT1G16860	21.6719	22.3019	0.971749	0.356748	0.583281
AT1G16870	12.6596	12.0663	1.04916	0.0671715	0.187751
AT1G16890	33.7461	33.0547	1.02092	0.0646053	0.182445
AT1G16900	5.85812	6.34042	0.923932	0.875895	0.940227
AT1G16916	4.7126	4.32891	1.08864	0.336255	0.56349
AT1G16920	20.3595	19.9878	1.0186	0.152468	0.335526
AT1G16930	1.70207	1.7007	1.00081	0.701216	0.846368
AT1G16960	7.57935	6.94202	1.09181	0.177133	0.371825
AT1G16970	4.32338	5.41483	0.798434	0.0805884	0.213964
AT1G17040	1.55384	2.00606	0.774575	0.166343	0.356618
AT1G17070	5.33621	6.606	0.807783	0.0666982	0.186616
AT1G17080	20.2412	20.1156	1.00624	0.240749	0.455179
AT1G17090	2.14449	3.29394	0.65104	0.0173149	0.0661138
AT1G17120	8.98382	9.24706	0.971533	0.558139	0.751691
AT1G17145	4.10739	4.61558	0.889897	0.64828	0.811377
AT1G17160	10.3098	9.85198	1.04647	0.0694328	0.192019
AT1G17170	0.945431	0.576929	1.63873	0.0672968	0.188008
AT1G17190	3.37718	2.99143	1.12895	0.15468	0.338538
AT1G17210	12.0022	12.6198	0.951059	0.521565	0.726592
AT1G17230	2.50645	2.60691	0.961461	0.76436	0.881646
AT1G17250	1.14984	1.57449	0.730297	0.181028	0.377733
AT1G17270	2.13628	2.30508	0.926769	0.943207	0.975565
AT1G17280	6.66197	8.41651	0.791536	0.0446152	0.138579
AT1G17330	6.81613	8.36484	0.814855	0.298057	0.522143
AT1G17340	4.67613	4.86963	0.960264	0.647374	0.810871
AT1G17350	3.06601	3.60324	0.850905	0.462274	0.678106
AT1G17370	23.2651	24.2879	0.957886	0.416278	0.640395
AT1G17410	2.38286	2.51052	0.94915	0.887413	0.94618
AT1G17420	6.43268	6.80301	0.945564	0.772063	0.885581
AT1G17430	8.26581	9.11153	0.907182	0.782684	0.891497
AT1G17450	2.38602	2.51538	0.948571	0.75154	0.874366
AT1G17455	5.60113	4.6594	1.20211	0.071428	0.195867
AT1G17460	1.77733	1.73098	1.02678	0.484516	0.696496
AT1G17470	36.2749	36.4256	0.995864	0.10524	0.260012
AT1G17480	2.16232	2.16589	0.998351	0.636912	0.803729
AT1G17490	13.2695	11.1532	1.18975	0.0157989	0.0612729
AT1G17500	3.94595	4.64458	0.849581	0.159424	0.346206
AT1G17510	8.53009	7.35148	1.16032	0.0673941	0.188123
AT1G17520	4.55557	4.67101	0.975286	0.690124	0.838773
AT1G17530	9.65609	8.84727	1.09142	0.0430161	0.13472
AT1G17550	15.8941	18.0813	0.879037	0.346641	0.573682
AT1G17560	7.33158	7.80623	0.939195	0.852973	0.927959
AT1G17580	4.70063	5.26755	0.892375	0.443526	0.663192
AT1G17600	1.01565	1.12576	0.902194	0.849136	0.925745
AT1G17620	16.5905	18.9998	0.873196	0.213496	0.421396
AT1G17630	1.046	1.17054	0.893602	0.804791	0.901652
AT1G17640	1.71299	1.62629	1.05331	0.490879	0.702315
AT1G17650	32.2092	31.172	1.03327	0.0172537	0.0659402
AT1G17680	4.73196	5.84475	0.80961	0.0592772	0.171924
AT1G17690	5.52261	6.8683	0.804072	0.0499801	0.151038
AT1G17700	2.23099	2.71731	0.82103	0.442512	0.662486
AT1G17720	19.406	22.2419	0.872498	0.142701	0.320757
AT1G17730	14.7474	15.9253	0.926034	0.964982	0.985319
AT1G17760	4.10104	4.51748	0.907816	0.900845	0.954706
AT1G17780	3.1381	4.11382	0.76282	0.12248	0.289324
AT1G17790	2.39907	2.67064	0.898313	0.744152	0.871002
AT1G17820	4.59529	5.72798	0.802253	0.0537039	0.159506
AT1G17850	5.27617	5.93285	0.889314	0.625707	0.796979
AT1G17860	5.0336	4.87718	1.03207	0.555779	0.750438
AT1G17870	1.01731	0.810672	1.25489	0.125374	0.293805
AT1G17880	129.434	136.922	0.945313	0.789977	0.894664
AT1G17890	16.0095	16.9057	0.946991	0.597305	0.779533
AT1G17920	1.87873	2.46973	0.760703	0.0718048	0.196644
AT1G17930	2.73797	3.00006	0.91264	0.82929	0.914899
AT1G17940	3.37617	4.07231	0.829055	0.168917	0.360251
AT1G17980	6.52298	6.29155	1.03678	0.140087	0.316922
AT1G18030	3.21438	3.7181	0.864523	0.587309	0.772147
AT1G18040	3.188	3.42825	0.929919	0.943102	0.975565
AT1G18060	53.6377	56.2718	0.953188	0.639308	0.805108
AT1G18090	2.22462	2.36435	0.940899	0.981606	0.992647
AT1G18160	7.66942	7.7329	0.991791	0.249048	0.465679
AT1G18170	39.3212	46.0914	0.853114	0.0781915	0.209021
AT1G18180	1.54783	1.24585	1.24238	0.184353	0.381919
AT1G18250	14.2376	14.7532	0.965054	0.538978	0.738078
AT1G18260	15.0338	15.4052	0.97589	0.247668	0.463978
AT1G18270	5.70984	6.45863	0.884063	0.362345	0.588606
AT1G18300	2.22464	1.84733	1.20425	0.176832	0.371424
AT1G18335	2.49599	2.77364	0.899895	0.76465	0.881704
AT1G18340	4.39562	4.54594	0.966932	0.764999	0.881704
AT1G18360	12.6225	11.7922	1.07042	0.0403099	0.128375
AT1G18370	3.76451	4.4381	0.848225	0.258448	0.476935
AT1G18390	0.944231	0.841499	1.12208	0.339159	0.56656
AT1G18420	2.17554	2.50408	0.868798	0.728496	0.861549
AT1G18440	8.60851	9.66842	0.890374	0.594267	0.776859
AT1G18450	13.9888	13.3365	1.04891	0.0550877	0.162439
AT1G18460	4.5325	4.4692	1.01416	0.350318	0.577313
AT1G18470	8.66	7.91402	1.09426	0.0200551	0.0742798
AT1G18480	7.82853	7.37045	1.06215	0.126371	0.295175
AT1G18485	5.46269	6.47409	0.843777	0.191646	0.391903
AT1G18490	6.07101	6.41482	0.946403	0.799582	0.899111
AT1G18500	21.5471	21.9145	0.983237	0.192593	0.393201
AT1G18550	1.79078	2.19785	0.814785	0.281419	0.504067
AT1G18560	1.68039	1.72227	0.975686	0.782704	0.891497
AT1G18580	6.04681	7.04408	0.858425	0.306661	0.530958
AT1G18590	24.0929	27.9611	0.861658	0.127848	0.297692
AT1G18600	8.90255	9.44794	0.942274	0.815519	0.907014
AT1G18610	2.34958	3.3049	0.710937	0.0188522	0.0707454
AT1G18620	8.58662	8.20978	1.0459	0.0577921	0.168556
AT1G18630	8.14835	9.62728	0.846382	0.353917	0.580687
AT1G18640	12.4413	12.206	1.01928	0.180971	0.377662
AT1G18650	10.6578	13.0323	0.817796	0.0563499	0.165363
AT1G18670	2.84835	3.76678	0.756176	0.0128723	0.0519852
AT1G18680	4.09611	4.04545	1.01252	0.542419	0.740557
AT1G18690	1.32905	1.6386	0.811091	0.21062	0.417782
[truncated: 11,695 more rows]

## Sheet: F1LC_nonadditive_genes
Gene	Expression (FPKM)		Ratio	pvalue	padj
[truncated: 4,124 more rows]

[truncated: 4 more sheets: F1LC_additive_peaks, F1LC_nonadditive_peaks, F1CL summary, F1LC summary]
