# Supplementary material for: Transcriptome-Wide Analysis of RNA m6A Methylation and Gene Expression Changes Among Two Arabidopsis Ecotypes and Their Reciprocal Hybrids
Source: Front Plant Sci. 2021 Jun 10;12:685189. doi: 10.3389/fpls.2021.685189 (PMC8222996; doi:10.3389/fpls.2021.685189)
Supplement: Supplementary Table 4 — The results of GO analysis of DMPs in each comparison. [file Table_4.xlsx]

## Sheet: Col-0 vs Ler DMG
GO_acc	term_type	Term	queryitem	querytotal	bgitem	bgtotal	pvalue	FDR	entries
GO:0044710	P	single-organism metabolic process	445	1709	3970	28362	9.6e-37	7.4e-33	// AT4G15560 // AT2G39020 // AT5G48230 // AT4G14210 // AT1G76490 // AT1G31180 // AT2G34630 // AT3G14415 // AT2G46505 // AT2G33220 // AT2G31810 // AT4G34700 // AT2G32950 // AT3G20810 // AT3G25860 // AT3G45300 // AT5G42270 // AT3G06550 // AT4G27820 // AT2G02390 // AT1G69690 // AT3G23940 // AT3G57650 // AT2G01690 // AT5G46290 // AT1G56190 // AT3G20390 // AT3G55610 // AT1G50430 // AT1G43560 // AT3G10…
GO:0044281	P	small molecule metabolic process	241	1709	1597	28362	2.1e-35	8e-32	// AT2G47510 // AT1G53240 // AT4G15560 // AT2G39020 // AT3G12290 // AT5G48230 // AT2G22230 // AT3G23940 // AT3G53180 // AT1G31180 // AT5G23070 // AT2G34630 // AT1G79500 // AT2G20860 // AT1G55090 // AT4G00895 // AT3G12780 // AT5G52100 // AT5G62790 // AT3G12800 // AT4G29010 // AT1G18500 // AT3G27380 // AT3G15730 // AT4G25050 // AT4G35260 // AT2G43090 // AT1G63660 // AT4G38510 // AT1G07110 // AT3G25…
GO:0009987	P	cellular process	1007	1709	12771	28362	3.4e-29	8.7e-26	// AT2G32920 // AT2G29210 // AT3G21865 // AT2G39020 // AT3G12290 // AT5G48230 // AT4G14210 // AT1G76490 // AT3G55750 // AT1G07420 // AT2G43150 // AT1G31180 // AT2G31610 // AT4G15560 // AT2G34630 // AT3G14415 // AT3G55040 // AT5G57180 // AT2G33220 // AT2G31810 // AT3G10070 // AT4G34700 // AT1G08200 // AT2G46280 // AT2G32950 // AT3G53870 // AT4G10000 // AT4G29410 // AT1G09690 // AT3G45300 // AT5G42…
GO:0044699	P	single-organism process	789	1709	9448	28362	9.5e-27	1.8e-23	// AT2G32920 // AT4G15560 // AT2G39020 // AT2G11890 // AT5G48230 // AT4G14210 // AT1G76490 // AT1G31180 // AT4G32530 // AT2G34630 // AT3G14415 // AT1G24340 // AT2G33220 // AT2G31810 // AT1G16460 // AT2G32950 // AT1G04940 // AT3G20810 // AT3G25860 // AT3G45300 // AT5G42270 // AT1G16280 // AT3G06550 // AT4G27820 // AT5G48385 // AT1G20090 // AT2G21190 // AT2G02390 // AT1G19910 // AT1G53320 // AT1G69…
GO:1901564	P	organonitrogen compound metabolic process	293	1709	2569	28362	2.8e-24	4.2e-21	// AT4G36130 // AT3G54660 // AT4G15560 // AT2G39020 // AT3G12290 // AT1G09690 // AT3G55750 // AT3G51820 // AT2G37250 // AT4G16390 // AT2G27530 // AT1G31180 // AT2G31610 // AT2G31955 // AT5G23070 // AT5G56350 // AT2G20860 // AT1G55090 // AT4G00895 // AT3G12780 // AT5G52100 // AT2G04390 // AT2G05220 // AT1G18500 // AT3G27380 // AT3G18680 // AT2G46280 // AT4G33250 // AT3G53870 // AT4G38510 // AT1G43…
GO:0019752	P	carboxylic acid metabolic process	138	1709	864	28362	2.7e-22	3.5e-19	// AT2G47510 // AT3G13930 // AT4G15560 // AT2G39020 // AT3G12780 // AT5G48230 // AT2G22230 // AT1G20510 // AT3G53180 // AT1G31180 // AT5G56350 // AT1G79500 // AT3G13490 // AT5G52100 // AT5G62790 // AT3G12800 // AT4G29010 // AT1G18500 // AT3G15730 // AT4G25050 // AT4G35260 // AT2G43090 // AT1G63660 // AT3G25860 // AT3G45300 // AT4G30950 // AT2G02390 // AT1G54630 // AT5G50850 // AT3G23940 // AT1G19…
GO:0044763	P	single-organism cellular process	578	1709	6591	28362	4.9e-22	4.3e-19	// AT2G32920 // AT4G15560 // AT2G39020 // AT5G48230 // AT4G14210 // AT1G76490 // AT1G31180 // AT2G34630 // AT2G31810 // AT4G34700 // AT2G32950 // AT3G20810 // AT3G25860 // AT3G45300 // AT5G42270 // AT3G06550 // AT1G20090 // AT2G21190 // AT2G02390 // AT1G19910 // AT1G69690 // AT1G20510 // AT5G03880 // AT3G57650 // AT2G15290 // AT5G21090 // AT5G46290 // AT3G10670 // AT1G56190 // AT3G20390 // AT5G11…
GO:0055114	P	oxidation-reduction process	202	1709	1566	28362	5e-22	4.3e-19	// AT2G47510 // AT3G54660 // AT5G48230 // AT4G14210 // AT2G41680 // AT3G59920 // AT1G03400 // AT4G30210 // AT1G31180 // AT3G63520 // AT3G08610 // AT1G23190 // AT3G14415 // AT1G08830 // AT5G52100 // AT1G24340 // AT5G62790 // AT3G12800 // AT4G29010 // AT4G35260 // AT4G22010 // AT1G32550 // AT2G47730 // AT3G14150 // AT3G20810 // AT5G06060 // AT3G45300 // AT5G67590 // AT3G06550 // AT5G43940 // AT2G02…
GO:0006082	P	organic acid metabolic process	160	1709	1099	28362	4.6e-22	4.3e-19	// AT2G47510 // AT3G13930 // AT4G15560 // AT2G39020 // AT3G12780 // AT5G48230 // AT2G22230 // AT3G23940 // AT3G53180 // AT1G31180 // AT5G56350 // AT1G79500 // AT3G13490 // AT5G52100 // AT5G62790 // AT3G12800 // AT4G29010 // AT1G18500 // AT3G15730 // AT4G25050 // AT4G35260 // AT2G43090 // AT1G63660 // AT3G25860 // AT3G45300 // AT4G30950 // AT5G64050 // AT1G54630 // AT5G50850 // AT1G22410 // AT1G20…
GO:0071840	P	cellular component organization or biogenesis	304	1709	2812	28362	6.4e-22	4.9e-19	// AT1G33240 // AT1G14400 // AT3G13870 // AT3G21865 // AT1G49510 // AT5G35200 // AT5G48230 // AT2G47450 // AT4G35860 // AT3G55750 // AT1G20090 // AT4G35760 // AT4G16390 // AT2G27530 // AT2G23930 // AT5G08050 // AT3G56310 // AT4G04210 // AT1G79500 // AT5G02610 // AT1G52740 // AT5G66680 // AT4G14870 // AT3G57090 // AT3G04550 // AT2G18710 // AT5G16620 // AT3G10070 // AT3G55340 // AT5G40930 // AT1G08…
GO:0008152	P	metabolic process	928	1709	12035	28362	7.1e-22	5e-19	// AT2G29210 // AT4G15560 // AT2G39020 // AT5G48230 // AT4G14210 // AT1G76490 // AT3G55750 // AT1G07420 // AT1G31180 // AT2G31610 // AT2G34630 // AT3G14415 // AT3G55040 // AT5G57180 // AT1G24340 // AT2G33220 // AT2G31810 // AT3G10070 // AT4G34700 // AT1G08200 // AT2G46280 // AT2G32950 // AT3G53870 // AT4G29410 // AT1G09690 // AT3G45300 // AT3G27110 // AT4G11560 // AT1G16280 // AT3G06550 // AT4G16…
GO:0043436	P	oxoacid metabolic process	143	1709	973	28362	4.1e-20	2.6e-17	// AT2G47510 // AT3G13930 // AT4G15560 // AT2G39020 // AT3G12780 // AT5G48230 // AT2G22230 // AT1G20510 // AT3G53180 // AT1G31180 // AT5G56350 // AT1G79500 // AT3G13490 // AT5G52100 // AT5G62790 // AT3G12800 // AT4G29010 // AT1G18500 // AT3G15730 // AT4G25050 // AT4G35260 // AT2G43090 // AT1G63660 // AT3G25860 // AT3G45300 // AT4G30950 // AT2G02390 // AT1G54630 // AT5G50850 // AT3G23940 // AT1G19…
GO:0006091	P	generation of precursor metabolites and energy	79	1709	364	28362	1e-19	6e-17	// AT2G47510 // AT5G40650 // AT4G27800 // AT5G19220 // AT3G12780 // AT1G53310 // AT1G75690 // AT5G58330 // AT4G38680 // AT3G02090 // AT2G21330 // AT1G70760 // AT3G27925 // AT4G30950 // AT5G56350 // AT1G06430 // AT5G51040 // AT1G12000 // AT5G08530 // AT4G24620 // AT3G13930 // AT4G35260 // AT3G60370 // AT1G54500 // AT5G52840 // AT2G39930 // AT3G52200 // AT2G46505 // AT1G32550 // AT5G67590 // AT1G54…
GO:0044237	P	cellular metabolic process	774	1709	9879	28362	3.4e-18	1.9e-15	// AT2G29210 // AT4G15560 // AT2G39020 // AT5G48230 // AT4G14210 // AT1G76490 // AT3G55750 // AT1G31180 // AT2G31610 // AT2G34630 // AT3G14415 // AT3G55040 // AT5G57180 // AT2G33220 // AT2G31810 // AT3G10070 // AT4G34700 // AT1G08200 // AT2G46280 // AT2G32950 // AT3G53870 // AT4G29410 // AT1G09690 // AT3G45300 // AT5G42270 // AT4G11560 // AT1G16280 // AT3G06550 // AT4G16720 // AT2G02390 // AT2G32…
GO:0016043	P	cellular component organization	261	1709	2456	28362	7.4e-18	3.8e-15	// AT1G33240 // AT1G14400 // AT3G13870 // AT3G21865 // AT1G49510 // AT5G35200 // AT5G48230 // AT2G47450 // AT4G35860 // AT1G20090 // AT4G35760 // AT4G16390 // AT2G43150 // AT5G08050 // AT3G56310 // AT4G04210 // AT1G79500 // AT1G72710 // AT1G52740 // AT5G66680 // AT4G14870 // AT2G18710 // AT5G16620 // AT3G10070 // AT3G55340 // AT5G40930 // AT1G08200 // AT2G43090 // AT5G61770 // AT4G38510 // AT5G52…
GO:0044711	P	single-organism biosynthetic process	203	1709	1735	28362	7.9e-18	3.8e-15	// AT4G15560 // AT3G12780 // AT5G48230 // AT2G22230 // AT4G14210 // AT1G76490 // AT3G51820 // AT3G23940 // AT3G53180 // AT1G31180 // AT5G19220 // AT2G34630 // AT1G79500 // AT2G20860 // AT1G55090 // AT4G00895 // AT5G52100 // AT5G62790 // AT4G29010 // AT1G18500 // AT4G25050 // AT2G43090 // AT1G06410 // AT5G62220 // AT4G39850 // AT2G41680 // AT1G23190 // AT3G06550 // AT4G30950 // AT5G17230 // AT1G54…
GO:0051186	P	cofactor metabolic process	78	1709	389	28362	9e-18	3.9e-15	// AT4G01690 // AT5G56860 // AT5G53850 // AT4G15560 // AT5G24400 // AT3G12780 // AT2G20860 // AT2G26540 // AT1G76490 // AT2G44750 // AT3G12290 // AT4G32180 // AT3G51820 // AT5G58330 // AT5G49970 // AT5G18660 // AT2G31955 // AT2G26670 // AT2G01350 // AT2G34630 // AT1G69740 // AT1G12000 // AT4G24620 // AT1G55090 // AT1G27320 // AT5G56350 // AT4G13250 // AT5G36880 // AT3G13930 // AT2G20570 // AT5G40…
GO:0015031	P	protein transport	106	1709	653	28362	8.8e-18	3.9e-15	// AT1G49410 // AT3G21865 // AT3G16270 // AT5G16620 // AT2G47450 // AT4G35860 // AT3G63130 // AT5G16830 // AT4G14870 // AT1G71480 // AT2G18710 // AT5G40930 // AT1G72750 // AT1G04940 // AT4G30600 // AT3G59920 // AT5G28750 // AT2G21190 // AT4G17530 // AT3G18890 // AT5G11490 // AT4G38790 // AT5G19820 // AT2G15290 // AT5G39510 // AT3G56900 // AT4G11380 // AT4G18710 // AT5G11150 // AT5G52440 // AT1G21…
GO:0008104	P	protein localization	112	1709	715	28362	1e-17	4.1e-15	// AT1G49410 // AT3G21865 // AT3G16270 // AT5G16620 // AT2G47450 // AT4G35860 // AT3G63130 // AT5G16830 // AT4G14870 // AT1G71480 // AT2G18710 // AT5G40930 // AT1G72750 // AT1G04940 // AT4G30600 // AT3G59920 // AT5G28750 // AT2G21190 // AT4G17530 // AT3G18890 // AT5G11490 // AT4G38790 // AT5G19820 // AT2G15290 // AT2G29530 // AT3G56900 // AT4G11380 // AT4G18710 // AT5G11150 // AT5G52440 // AT1G21…
GO:0045184	P	establishment of protein localization	106	1709	661	28362	1.9e-17	6.9e-15	// AT1G49410 // AT3G21865 // AT3G16270 // AT5G16620 // AT2G47450 // AT4G35860 // AT3G63130 // AT5G16830 // AT4G14870 // AT1G71480 // AT2G18710 // AT5G40930 // AT1G72750 // AT1G04940 // AT4G30600 // AT3G59920 // AT5G28750 // AT2G21190 // AT4G17530 // AT3G18890 // AT5G11490 // AT4G38790 // AT5G19820 // AT2G15290 // AT5G39510 // AT3G56900 // AT4G11380 // AT4G18710 // AT5G11150 // AT5G52440 // AT1G21…
GO:0006996	P	organelle organization	168	1709	1335	28362	1.8e-17	6.9e-15	// AT1G14400 // AT3G13870 // AT3G21865 // AT1G49510 // AT5G16620 // AT1G72750 // AT4G16390 // AT5G08050 // AT4G04210 // AT1G52740 // AT4G14870 // AT2G18710 // AT3G10070 // AT3G55340 // AT5G40930 // AT2G43090 // AT5G61770 // AT4G38510 // AT5G52470 // AT3G20810 // AT2G03680 // AT4G11150 // AT3G07430 // AT3G57090 // AT5G49720 // AT1G55900 // AT1G20090 // AT1G17440 // AT2G17870 // AT3G42790 // AT1G48…
GO:0046907	P	intracellular transport	86	1709	473	28362	3.5e-17	1.2e-14	// AT3G13870 // AT3G16270 // AT5G16620 // AT2G47450 // AT3G63130 // AT5G57180 // AT5G40930 // AT1G72750 // AT1G04940 // AT4G30600 // AT4G17530 // AT5G11490 // AT5G16830 // AT5G19820 // AT1G08820 // AT2G15290 // AT2G40730 // AT5G39510 // AT4G11380 // AT1G21650 // AT5G52440 // AT1G10290 // AT3G44100 // AT5G02770 // AT1G21900 // AT2G29530 // AT3G44340 // AT5G17020 // AT3G56190 // AT1G60070 // AT2G45…
GO:0051649	P	establishment of localization in cell	87	1709	488	28362	6.4e-17	2.1e-14	// AT3G13870 // AT3G16270 // AT5G16620 // AT2G47450 // AT3G63130 // AT5G57180 // AT5G40930 // AT1G72750 // AT1G04940 // AT4G30600 // AT4G17530 // AT5G11490 // AT5G16830 // AT5G19820 // AT1G08820 // AT2G15290 // AT2G40730 // AT5G39510 // AT4G11380 // AT1G21650 // AT5G52440 // AT1G10290 // AT3G44100 // AT5G02770 // AT1G21900 // AT2G29530 // AT3G44340 // AT5G17020 // AT3G56190 // AT1G60070 // AT2G45…
GO:0051641	P	cellular localization	98	1709	601	28362	1.2e-16	3.9e-14	// AT3G13870 // AT3G16270 // AT5G16620 // AT2G47450 // AT3G63130 // AT5G16830 // AT5G57180 // AT5G40930 // AT1G72750 // AT1G04940 // AT4G30600 // AT2G21190 // AT4G17530 // AT5G11490 // AT4G38790 // AT5G19820 // AT1G08820 // AT2G15290 // AT3G56090 // AT2G40730 // AT5G39510 // AT4G11380 // AT1G71480 // AT5G52440 // AT1G10290 // AT3G44100 // AT5G02770 // AT1G21900 // AT2G29530 // AT3G44340 // AT5G17…
GO:0009117	P	nucleotide metabolic process	65	1709	302	28362	2.6e-16	8e-14	// AT5G40650 // AT3G12780 // AT4G32260 // AT1G09830 // AT4G24620 // AT4G32180 // AT5G58330 // AT5G49970 // AT3G02090 // AT2G21330 // AT1G20260 // AT3G52300 // AT2G01350 // AT4G22930 // AT3G55010 // AT5G51040 // AT1G04410 // AT5G08530 // AT1G55090 // AT4G00895 // AT3G13930 // AT1G15120 // AT3G27740 // AT2G35040 // AT3G52200 // AT4G38510 // AT4G34700 // AT1G78900 // AT1G12000 // AT3G25860 // AT3G57…
GO:0044283	P	small molecule biosynthetic process	102	1709	653	28362	3.6e-16	1.1e-13	// AT4G15560 // AT4G29010 // AT2G22230 // AT2G37250 // AT1G31180 // AT2G34630 // AT1G79500 // AT2G20860 // AT5G52100 // AT2G31810 // AT4G25050 // AT2G43090 // AT5G09820 // AT4G30950 // AT5G17230 // AT4G33680 // AT3G23940 // AT1G54630 // AT1G22410 // AT1G19440 // AT5G12200 // AT5G46290 // AT5G11880 // AT4G17830 // AT4G02610 // AT3G55610 // AT1G50430 // AT4G33510 // AT2G29690 // AT2G21330 // AT3G58…
GO:0006753	P	nucleoside phosphate metabolic process	65	1709	305	28362	3.9e-16	1.1e-13	// AT5G40650 // AT3G12780 // AT4G32260 // AT1G09830 // AT4G24620 // AT4G32180 // AT5G58330 // AT5G49970 // AT3G02090 // AT2G21330 // AT1G20260 // AT3G52300 // AT2G01350 // AT4G22930 // AT3G55010 // AT5G51040 // AT1G04410 // AT5G08530 // AT1G55090 // AT4G00895 // AT3G13930 // AT1G15120 // AT3G27740 // AT2G35040 // AT3G52200 // AT4G38510 // AT4G34700 // AT1G78900 // AT1G12000 // AT3G25860 // AT3G57…
GO:0006810	P	transport	249	1709	2391	28362	4.4e-16	1.2e-13	// AT1G07140 // AT3G13870 // AT3G21865 // AT3G16270 // AT5G35200 // AT2G47450 // AT4G35860 // AT3G63130 // AT4G33530 // AT5G11490 // AT4G32530 // AT1G69960 // AT2G25610 // AT1G31812 // AT1G19770 // AT4G00895 // AT5G57180 // AT1G71480 // AT5G16830 // AT2G18710 // AT1G54990 // AT2G33470 // AT5G12370 // AT5G40930 // AT5G55290 // AT5G58070 // AT5G01500 // AT4G23710 // AT1G72750 // AT1G04940 // AT4G11…
GO:0051234	P	establishment of localization	250	1709	2406	28362	4.9e-16	1.3e-13	// AT1G07140 // AT3G13870 // AT3G21865 // AT3G16270 // AT5G35200 // AT2G47450 // AT4G35860 // AT3G63130 // AT4G33530 // AT5G11490 // AT4G32530 // AT1G69960 // AT2G25610 // AT1G31812 // AT1G19770 // AT4G00895 // AT5G57180 // AT1G71480 // AT5G16830 // AT2G18710 // AT1G54990 // AT2G33470 // AT5G12370 // AT5G40930 // AT5G55290 // AT5G58070 // AT5G01500 // AT4G23710 // AT1G72750 // AT1G04940 // AT4G11…
GO:0046686	P	response to cadmium ion	69	1709	343	28362	6.2e-16	1.6e-13	// AT5G02790 // AT4G31990 // AT5G11170 // AT1G18080 // AT1G08110 // AT1G20630 // AT3G18190 // AT1G62740 // AT1G30230 // AT2G21330 // AT5G49910 // AT5G62790 // AT3G19170 // AT1G04510 // AT1G15930 // AT3G58610 // AT1G12000 // AT3G12780 // AT1G02130 // AT2G45030 // AT1G56450 // AT1G74910 // AT3G15730 // AT5G63400 // AT2G46280 // AT3G13110 // AT1G23190 // AT4G09000 // AT3G22110 // AT4G35450 // AT1G04…
GO:0051179	P	localization	258	1709	2517	28362	6.7e-16	1.7e-13	// AT1G07140 // AT3G13870 // AT3G21865 // AT3G16270 // AT5G35200 // AT2G47450 // AT4G35860 // AT3G63130 // AT4G33530 // AT5G11490 // AT4G32530 // AT1G69960 // AT2G25610 // AT1G31812 // AT1G19770 // AT4G00895 // AT5G57180 // AT1G71480 // AT5G16830 // AT2G18710 // AT1G54990 // AT2G33470 // AT5G12370 // AT5G40930 // AT5G55290 // AT5G58070 // AT5G01500 // AT4G23710 // AT1G72750 // AT1G04940 // AT4G11…
GO:0019637	P	organophosphate metabolic process	88	1709	524	28362	9.9e-16	2.4e-13	// AT4G15560 // AT3G12780 // AT1G76490 // AT4G02260 // AT2G31955 // AT4G24620 // AT1G55090 // AT4G00895 // AT1G34430 // AT5G62790 // AT4G25050 // AT1G07110 // AT4G11150 // AT5G48545 // AT3G06310 // AT5G50850 // AT2G01290 // AT3G54470 // AT3G57650 // AT1G54630 // AT4G02580 // AT2G28520 // AT1G56190 // AT3G56490 // AT4G32260 // AT1G09830 // AT4G32180 // AT5G58330 // AT2G21330 // AT3G52300 // AT4G22…
GO:1901566	P	organonitrogen compound biosynthetic process	222	1709	2076	28362	1.8e-15	4.2e-13	// AT4G36130 // AT4G15560 // AT3G13490 // AT3G12290 // AT1G75510 // AT3G55750 // AT3G51820 // AT2G37250 // AT4G16390 // AT2G27530 // AT1G31180 // AT2G31610 // AT2G31955 // AT3G62030 // AT1G55090 // AT4G00895 // AT5G52100 // AT2G04390 // AT2G05220 // AT1G18500 // AT3G18680 // AT2G46280 // AT4G33250 // AT3G53870 // AT1G43190 // AT1G09690 // AT2G16930 // AT4G16720 // AT1G75330 // AT1G17440 // AT4G33…
GO:0055086	P	nucleobase-containing small molecule metabolic process	71	1709	370	28362	1.9e-15	4.3e-13	// AT5G40650 // AT3G12780 // AT4G32260 // AT1G09830 // AT4G24620 // AT4G32180 // AT5G58330 // AT5G49970 // AT3G02090 // AT2G21330 // AT1G20260 // AT3G52300 // AT2G01350 // AT4G22930 // AT5G23070 // AT3G55010 // AT5G51040 // AT1G04410 // AT5G08530 // AT1G55090 // AT1G27320 // AT4G00895 // AT3G13930 // AT5G12200 // AT3G27740 // AT2G35040 // AT1G15120 // AT3G52200 // AT4G38510 // AT4G34700 // AT1G78…
GO:0019693	P	ribose phosphate metabolic process	56	1709	245	28362	3.4e-15	7.5e-13	// AT5G40650 // AT3G12780 // AT4G32260 // AT1G09830 // AT4G32180 // AT4G26510 // AT4G24620 // AT3G02090 // AT2G21330 // AT1G20260 // AT3G52300 // AT4G22930 // AT3G55010 // AT5G51040 // AT1G12000 // AT5G08530 // AT4G00895 // AT3G13930 // AT1G15120 // AT3G27740 // AT4G38510 // AT4G34700 // AT1G78900 // AT3G52200 // AT3G25860 // AT3G57610 // AT5G48545 // AT2G33040 // AT4G11010 // AT4G02260 // AT3G06…
GO:0009259	P	ribonucleotide metabolic process	53	1709	221	28362	3.5e-15	7.5e-13	// AT5G40650 // AT3G12780 // AT4G32260 // AT1G09830 // AT4G32180 // AT4G26510 // AT4G24620 // AT3G02090 // AT2G21330 // AT1G20260 // AT3G52300 // AT4G22930 // AT5G56350 // AT5G51040 // AT1G12000 // AT5G08530 // AT4G00895 // AT3G13930 // AT1G15120 // AT3G27740 // AT4G38510 // AT4G34700 // AT1G78900 // AT3G52200 // AT3G25860 // AT3G57610 // AT5G48545 // AT2G33040 // AT4G11010 // AT4G02260 // AT3G06…
GO:0006163	P	purine nucleotide metabolic process	50	1709	204	28362	1e-14	2.1e-12	// AT5G40650 // AT3G12780 // AT4G32260 // AT1G09830 // AT4G32180 // AT4G24620 // AT3G02090 // AT2G21330 // AT1G20260 // AT3G52300 // AT5G56350 // AT5G51040 // AT1G12000 // AT5G08530 // AT4G00895 // AT3G13930 // AT1G15120 // AT2G35040 // AT4G38510 // AT4G34700 // AT1G78900 // AT3G52200 // AT3G25860 // AT3G57610 // AT5G48545 // AT2G33040 // AT4G11010 // AT4G02260 // AT3G06310 // AT5G50850 // AT3G52…
GO:0010038	P	response to metal ion	81	1709	481	28362	1.2e-14	2.5e-12	// AT2G40300 // AT5G35590 // AT4G31990 // AT5G11170 // AT1G18080 // AT1G08110 // AT1G20630 // AT3G18190 // AT1G62740 // AT1G30230 // AT5G02790 // AT2G21330 // AT5G49910 // AT5G37780 // AT3G19170 // AT1G04510 // AT1G15930 // AT3G58610 // AT1G12000 // AT1G08830 // AT4G24460 // AT1G02130 // AT2G45030 // AT1G56450 // AT1G74910 // AT1G20340 // AT3G15730 // AT5G63400 // AT2G46280 // AT3G13110 // AT1G23…
GO:0033036	P	macromolecule localization	129	1709	996	28362	1.9e-14	3.8e-12	// AT1G49410 // AT3G21865 // AT3G16270 // AT5G16620 // AT2G47450 // AT4G35860 // AT3G63130 // AT5G16830 // AT5G57180 // AT1G71480 // AT2G18710 // AT2G33470 // AT5G40930 // AT1G72750 // AT1G04940 // AT4G30600 // AT3G59920 // AT5G28750 // AT2G21190 // AT4G17530 // AT3G18890 // AT5G11490 // AT4G38790 // AT5G19820 // AT2G15290 // AT2G40730 // AT2G29530 // AT3G56900 // AT4G11380 // AT4G18710 // AT5G11…
GO:0009150	P	purine ribonucleotide metabolic process	49	1709	202	28362	2.6e-14	5.1e-12	// AT5G40650 // AT3G12780 // AT4G32260 // AT1G09830 // AT4G32180 // AT4G24620 // AT3G02090 // AT2G21330 // AT1G20260 // AT3G52300 // AT5G56350 // AT5G51040 // AT1G12000 // AT5G08530 // AT4G00895 // AT3G13930 // AT1G15120 // AT4G38510 // AT4G34700 // AT1G78900 // AT3G52200 // AT3G25860 // AT3G57610 // AT5G48545 // AT2G33040 // AT4G11010 // AT4G02260 // AT3G06310 // AT5G50850 // AT3G52990 // AT1G22…
GO:0006886	P	intracellular protein transport	66	1709	350	28362	3.8e-14	7.2e-12	// AT1G07140 // AT3G16270 // AT5G16620 // AT2G47450 // AT1G60780 // AT1G55900 // AT5G43970 // AT3G08530 // AT1G04750 // AT3G63130 // AT2G20760 // AT5G49910 // AT3G44340 // AT3G07680 // AT5G17020 // AT1G75850 // AT5G39510 // AT2G45790 // AT2G01110 // AT1G27970 // AT5G41685 // AT5G57180 // AT1G71480 // AT1G60070 // AT4G24920 // AT5G40930 // AT4G14160 // AT3G47810 // AT5G11490 // AT1G72750 // AT4G02…
GO:0009161	P	ribonucleoside monophosphate metabolic process	47	1709	191	28362	5.6e-14	1e-11	// AT5G40650 // AT3G12780 // AT4G32260 // AT1G09830 // AT4G26510 // AT4G24620 // AT3G02090 // AT2G21330 // AT1G20260 // AT3G52300 // AT4G22930 // AT5G56350 // AT5G51040 // AT1G12000 // AT5G08530 // AT4G00895 // AT3G13930 // AT1G15120 // AT3G27740 // AT4G38510 // AT4G34700 // AT1G78900 // AT3G52200 // AT3G25860 // AT2G33040 // AT3G57610 // AT3G06310 // AT5G50850 // AT3G54470 // AT3G52990 // AT1G22…
GO:0034613	P	cellular protein localization	72	1709	410	28362	6.1e-14	1.1e-11	// AT1G07140 // AT3G16270 // AT5G16620 // AT2G47450 // AT4G26670 // AT1G55900 // AT5G43970 // AT3G08530 // AT1G04750 // AT3G63130 // AT2G20760 // AT5G49910 // AT3G07680 // AT3G44340 // AT5G17020 // AT1G75850 // AT5G39510 // AT2G45790 // AT2G01110 // AT3G25040 // AT5G41685 // AT5G57180 // AT1G71480 // AT1G60070 // AT4G24920 // AT1G60780 // AT5G40930 // AT4G14160 // AT3G47810 // AT5G11490 // AT1G72…
GO:0015992	P	proton transport	30	1709	74	28362	6.6e-14	1.1e-11	// AT3G42050 // AT4G32260 // AT2G19680 // AT3G52300 // AT4G32530 // AT4G38920 // AT2G25610 // AT4G00895 // AT2G16510 // AT4G34720 // AT4G02620 // AT4G38510 // AT1G78900 // AT4G11150 // AT4G23710 // AT2G33040 // AT1G19910 // AT1G12840 // AT3G28710 // AT5G55290 // AT3G28715 // AT5G13450 // AT4G29480 // AT4G39080 // AT1G20260 // AT4G26710 // AT2G28520 // AT1G75630 // AT4G27500 // AT2G22500
GO:0006818	P	hydrogen transport	30	1709	74	28362	6.6e-14	1.1e-11	// AT3G42050 // AT4G32260 // AT2G19680 // AT3G52300 // AT4G32530 // AT4G38920 // AT2G25610 // AT4G00895 // AT2G16510 // AT4G34720 // AT4G02620 // AT4G38510 // AT1G78900 // AT4G11150 // AT4G23710 // AT2G33040 // AT1G19910 // AT1G12840 // AT3G28710 // AT5G55290 // AT3G28715 // AT5G13450 // AT4G29480 // AT4G39080 // AT1G20260 // AT4G26710 // AT2G28520 // AT1G75630 // AT4G27500 // AT2G22500
GO:0009205	P	purine ribonucleoside triphosphate metabolic process	42	1709	155	28362	8e-14	1.3e-11	// AT5G40650 // AT3G12780 // AT4G32260 // AT4G24620 // AT3G02090 // AT2G21330 // AT1G20260 // AT3G52300 // AT5G56350 // AT5G51040 // AT1G12000 // AT5G08530 // AT4G00895 // AT3G13930 // AT1G15120 // AT4G38510 // AT4G34700 // AT1G78900 // AT3G52200 // AT3G25860 // AT2G33040 // AT4G11010 // AT3G06310 // AT5G50850 // AT3G52990 // AT1G22840 // AT5G18800 // AT5G42740 // AT1G79550 // AT5G13450 // AT1G34…
GO:0009144	P	purine nucleoside triphosphate metabolic process	42	1709	157	28362	1.2e-13	1.9e-11	// AT5G40650 // AT3G12780 // AT4G32260 // AT4G24620 // AT3G02090 // AT2G21330 // AT1G20260 // AT3G52300 // AT5G56350 // AT5G51040 // AT1G12000 // AT5G08530 // AT4G00895 // AT3G13930 // AT1G15120 // AT4G38510 // AT4G34700 // AT1G78900 // AT3G52200 // AT3G25860 // AT2G33040 // AT4G11010 // AT3G06310 // AT5G50850 // AT3G52990 // AT1G22840 // AT5G18800 // AT5G42740 // AT1G79550 // AT5G13450 // AT1G34…
GO:0009199	P	ribonucleoside triphosphate metabolic process	43	1709	165	28362	1.3e-13	2e-11	// AT5G40650 // AT3G12780 // AT4G32260 // AT4G26510 // AT4G24620 // AT3G02090 // AT2G21330 // AT1G20260 // AT3G52300 // AT5G56350 // AT5G51040 // AT1G12000 // AT5G08530 // AT4G00895 // AT3G13930 // AT1G15120 // AT4G38510 // AT4G34700 // AT1G78900 // AT3G52200 // AT3G25860 // AT2G33040 // AT4G11010 // AT3G06310 // AT5G50850 // AT3G52990 // AT1G22840 // AT5G18800 // AT5G42740 // AT1G79550 // AT5G13…
GO:0009123	P	nucleoside monophosphate metabolic process	47	1709	196	28362	1.3e-13	2e-11	// AT5G40650 // AT3G12780 // AT4G32260 // AT1G09830 // AT4G26510 // AT4G24620 // AT3G02090 // AT2G21330 // AT1G20260 // AT3G52300 // AT4G22930 // AT5G56350 // AT5G51040 // AT1G12000 // AT5G08530 // AT4G00895 // AT3G13930 // AT1G15120 // AT3G27740 // AT4G38510 // AT4G34700 // AT1G78900 // AT3G52200 // AT3G25860 // AT2G33040 // AT3G57610 // AT3G06310 // AT5G50850 // AT3G54470 // AT3G52990 // AT1G22…
GO:0044085	P	cellular component biogenesis	135	1709	1095	28362	1.3e-13	2e-11	// AT3G13870 // AT5G35200 // AT3G55750 // AT2G27530 // AT5G08050 // AT1G79500 // AT5G02610 // AT2G36000 // AT3G10070 // AT3G18035 // AT3G15190 // AT5G61770 // AT5G52470 // AT4G29410 // AT4G11150 // AT3G20970 // AT1G16280 // AT3G06550 // AT1G51390 // AT4G04340 // AT1G48620 // AT4G35760 // AT1G66580 // AT5G25757 // AT4G04770 // AT3G14010 // AT1G02780 // AT1G26880 // AT1G66070 // AT2G44525 // AT1G09…
GO:0070727	P	cellular macromolecule localization	74	1709	441	28362	2e-13	3e-11	// AT1G07140 // AT3G16270 // AT5G16620 // AT2G47450 // AT4G26670 // AT1G55900 // AT5G43970 // AT3G08530 // AT1G04750 // AT3G63130 // AT2G20760 // AT5G49910 // AT3G07680 // AT3G44340 // AT5G17020 // AT1G75850 // AT5G39510 // AT2G45790 // AT2G01110 // AT3G25040 // AT5G41685 // AT5G57180 // AT1G71480 // AT1G60070 // AT4G24920 // AT1G60780 // AT5G40930 // AT4G14160 // AT3G47810 // AT5G11490 // AT1G72…
GO:0009657	P	plastid organization	48	1709	207	28362	2e-13	3e-11	// AT1G49510 // AT1G35680 // AT5G16620 // AT4G31780 // AT3G52750 // AT1G06430 // AT2G48120 // AT3G23400 // AT5G24660 // AT2G36250 // AT1G21650 // AT5G08050 // AT5G51020 // AT2G01110 // AT2G25870 // AT4G14870 // AT2G33150 // AT2G18710 // AT2G38140 // AT2G28000 // AT2G24060 // AT2G47940 // AT5G55280 // AT2G32480 // AT2G20890 // AT2G43090 // AT5G64050 // AT1G06950 // AT2G34860 // AT4G20130 // AT2G33…
GO:0072521	P	purine-containing compound metabolic process	51	1709	233	28362	2.4e-13	3.5e-11	// AT5G40650 // AT3G12780 // AT4G32260 // AT1G09830 // AT4G32180 // AT4G24620 // AT3G02090 // AT2G21330 // AT1G20260 // AT3G52300 // AT5G56350 // AT5G51040 // AT1G12000 // AT5G08530 // AT4G00895 // AT3G13930 // AT1G15120 // AT2G35040 // AT4G38510 // AT4G34700 // AT1G78900 // AT3G52200 // AT3G25860 // AT3G57610 // AT5G48545 // AT2G33040 // AT4G11010 // AT4G02260 // AT3G06310 // AT5G50850 // AT3G52…
GO:0009141	P	nucleoside triphosphate metabolic process	43	1709	170	28362	3e-13	4.3e-11	// AT5G40650 // AT3G12780 // AT4G32260 // AT4G26510 // AT4G24620 // AT3G02090 // AT2G21330 // AT1G20260 // AT3G52300 // AT5G56350 // AT5G51040 // AT1G12000 // AT5G08530 // AT4G00895 // AT3G13930 // AT1G15120 // AT4G38510 // AT4G34700 // AT1G78900 // AT3G52200 // AT3G25860 // AT2G33040 // AT4G11010 // AT3G06310 // AT5G50850 // AT3G52990 // AT1G22840 // AT5G18800 // AT5G42740 // AT1G79550 // AT5G13…
GO:0046034	P	ATP metabolic process	40	1709	148	28362	3.4e-13	4.7e-11	// AT5G40650 // AT3G12780 // AT4G32260 // AT4G24620 // AT3G02090 // AT2G21330 // AT1G20260 // AT3G52300 // AT5G56350 // AT5G51040 // AT1G12000 // AT5G08530 // AT4G00895 // AT3G13930 // AT1G15120 // AT4G38510 // AT4G34700 // AT1G78900 // AT3G52200 // AT3G25860 // AT2G33040 // AT3G06310 // AT5G50850 // AT3G52990 // AT1G22840 // AT5G18800 // AT5G42740 // AT1G79550 // AT5G13450 // AT1G34430 // AT2G21…
GO:0009119	P	ribonucleoside metabolic process	50	1709	227	28362	3.4e-13	4.7e-11	// AT5G40650 // AT3G12780 // AT4G32260 // AT4G32180 // AT4G26510 // AT4G24620 // AT3G02090 // AT2G21330 // AT1G20260 // AT3G52300 // AT4G22930 // AT5G56350 // AT5G51040 // AT1G12000 // AT5G08530 // AT4G00895 // AT3G13930 // AT1G15120 // AT3G27740 // AT4G38510 // AT4G34700 // AT1G78900 // AT3G52200 // AT3G25860 // AT3G57610 // AT2G33040 // AT4G11010 // AT4G02260 // AT3G06310 // AT5G50850 // AT3G54…
GO:0015979	P	photosynthesis	53	1709	253	28362	3.7e-13	5e-11	// AT4G27600 // AT4G27800 // AT3G05410 // AT1G53310 // AT1G75690 // AT1G31330 // AT1G06430 // AT4G35760 // AT2G26670 // AT1G70760 // AT3G27925 // AT4G30950 // AT3G12780 // AT1G12000 // AT1G08520 // AT3G21055 // AT5G52100 // AT3G60370 // AT1G54500 // AT1G49975 // AT4G01050 // AT5G42270 // AT1G54780 // AT2G47940 // AT2G20890 // AT5G13630 // AT2G40300 // AT4G33520 // AT4G02260 // AT1G67740 // AT5G57…
GO:0046128	P	purine ribonucleoside metabolic process	46	1709	197	28362	5.1e-13	6.8e-11	// AT5G40650 // AT3G12780 // AT4G32260 // AT4G32180 // AT4G24620 // AT3G02090 // AT2G21330 // AT1G20260 // AT3G52300 // AT5G56350 // AT5G51040 // AT1G12000 // AT5G08530 // AT4G00895 // AT3G13930 // AT1G15120 // AT4G38510 // AT4G34700 // AT1G78900 // AT3G52200 // AT3G25860 // AT3G57610 // AT2G33040 // AT4G11010 // AT4G02260 // AT3G06310 // AT5G50850 // AT3G52990 // AT1G22840 // AT5G18800 // AT5G42…
GO:0009167	P	purine ribonucleoside monophosphate metabolic process	43	1709	174	28362	5.8e-13	7.5e-11	// AT5G40650 // AT3G12780 // AT4G32260 // AT1G09830 // AT4G24620 // AT3G02090 // AT2G21330 // AT1G20260 // AT3G52300 // AT5G56350 // AT5G51040 // AT1G12000 // AT5G08530 // AT4G00895 // AT3G13930 // AT1G15120 // AT4G38510 // AT4G34700 // AT1G78900 // AT3G52200 // AT3G25860 // AT2G33040 // AT3G57610 // AT3G06310 // AT5G50850 // AT3G52990 // AT1G22840 // AT5G18800 // AT4G11150 // AT5G42740 // AT1G79…
GO:0009126	P	purine nucleoside monophosphate metabolic process	43	1709	174	28362	5.8e-13	7.5e-11	// AT5G40650 // AT3G12780 // AT4G32260 // AT1G09830 // AT4G24620 // AT3G02090 // AT2G21330 // AT1G20260 // AT3G52300 // AT5G56350 // AT5G51040 // AT1G12000 // AT5G08530 // AT4G00895 // AT3G13930 // AT1G15120 // AT4G38510 // AT4G34700 // AT1G78900 // AT3G52200 // AT3G25860 // AT2G33040 // AT3G57610 // AT3G06310 // AT5G50850 // AT3G52990 // AT1G22840 // AT5G18800 // AT4G11150 // AT5G42740 // AT1G79…
GO:0009116	P	nucleoside metabolic process	53	1709	258	28362	7.2e-13	9.1e-11	// AT5G40650 // AT3G12780 // AT4G32260 // AT4G32180 // AT4G26510 // AT4G24620 // AT3G02090 // AT2G21330 // AT1G20260 // AT3G52300 // AT4G22930 // AT5G23070 // AT5G56350 // AT5G51040 // AT1G12000 // AT5G08530 // AT1G27320 // AT4G00895 // AT3G13930 // AT1G15120 // AT3G27740 // AT4G38510 // AT4G34700 // AT1G78900 // AT3G52200 // AT3G25860 // AT3G57610 // AT2G33040 // AT4G11010 // AT4G02260 // AT3G06…
GO:0042278	P	purine nucleoside metabolic process	46	1709	200	28362	8.1e-13	1e-10	// AT5G40650 // AT3G12780 // AT4G32260 // AT4G32180 // AT4G24620 // AT3G02090 // AT2G21330 // AT1G20260 // AT3G52300 // AT5G56350 // AT5G51040 // AT1G12000 // AT5G08530 // AT4G00895 // AT3G13930 // AT1G15120 // AT4G38510 // AT4G34700 // AT1G78900 // AT3G52200 // AT3G25860 // AT3G57610 // AT2G33040 // AT4G11010 // AT4G02260 // AT3G06310 // AT5G50850 // AT3G52990 // AT1G22840 // AT5G18800 // AT5G42…
GO:1902600	P	hydrogen ion transmembrane transport	25	1709	56	28362	1.5e-12	1.8e-10	// AT3G42050 // AT4G32260 // AT3G52300 // AT4G32530 // AT4G38920 // AT2G25610 // AT4G00895 // AT2G16510 // AT4G34720 // AT4G02620 // AT4G38510 // AT1G78900 // AT4G11150 // AT2G33040 // AT1G19910 // AT1G12840 // AT5G55290 // AT3G28715 // AT5G13450 // AT3G28710 // AT4G39080 // AT1G20260 // AT4G26710 // AT2G28520 // AT1G75630
GO:0015991	P	ATP hydrolysis coupled proton transport	20	1709	31	28362	1.6e-12	1.9e-10	// AT3G28715 // AT3G42050 // AT3G28710 // AT2G16510 // AT4G34720 // AT1G19910 // AT4G39080 // AT1G20260 // AT4G11150 // AT5G55290 // AT4G26710 // AT2G28520 // AT4G02620 // AT4G38510 // AT1G78900 // AT1G75630 // AT4G32530 // AT4G38920 // AT2G25610 // AT1G12840
GO:0090662	P	ATP hydrolysis coupled transmembrane transport	20	1709	31	28362	1.6e-12	1.9e-10	// AT3G28715 // AT3G42050 // AT3G28710 // AT2G16510 // AT4G34720 // AT1G19910 // AT4G39080 // AT1G20260 // AT4G11150 // AT5G55290 // AT4G26710 // AT2G28520 // AT4G02620 // AT4G38510 // AT1G78900 // AT1G75630 // AT4G32530 // AT4G38920 // AT2G25610 // AT1G12840
GO:0015988	P	energy coupled proton transmembrane transport, against electrochemical gradient	20	1709	32	28362	2.4e-12	2.8e-10	// AT3G28715 // AT3G42050 // AT3G28710 // AT2G16510 // AT4G34720 // AT1G19910 // AT4G39080 // AT1G20260 // AT4G11150 // AT5G55290 // AT4G26710 // AT2G28520 // AT4G02620 // AT4G38510 // AT1G78900 // AT1G75630 // AT4G32530 // AT4G38920 // AT2G25610 // AT1G12840
GO:1901135	P	carbohydrate derivative metabolic process	91	1709	645	28362	2.6e-12	3e-10	// AT4G15560 // AT3G12780 // AT5G23070 // AT4G24620 // AT1G79500 // AT2G45790 // AT5G66680 // AT4G00895 // AT1G34430 // AT5G62790 // AT4G25050 // AT1G08200 // AT4G38510 // AT1G07110 // AT3G25860 // AT5G48545 // AT3G06310 // AT5G50850 // AT2G01290 // AT3G54470 // AT1G54630 // AT4G02580 // AT2G28520 // AT1G56190 // AT3G56490 // AT4G32260 // AT1G09830 // AT4G32180 // AT2G21330 // AT3G52300 // AT4G22…
GO:0009628	P	response to abiotic stimulus	205	1709	2022	28362	2.6e-12	3e-10	// AT2G47510 // AT1G33240 // AT3G23600 // AT3G12780 // AT2G47450 // AT4G16830 // AT4G39960 // AT5G42900 // AT1G31180 // AT2G31610 // AT5G08050 // AT1G23190 // AT5G23070 // AT3G62030 // AT1G52740 // AT1G08830 // AT3G26744 // AT4G26840 // AT5G10010 // AT1G54990 // AT5G13180 // AT2G02760 // AT2G46280 // AT2G47730 // AT2G43090 // AT3G53870 // AT5G06290 // AT2G03680 // AT4G11150 // AT5G42270 // AT1G51…
GO:0010035	P	response to inorganic substance	116	1709	926	28362	3e-12	3.4e-10	// AT1G33240 // AT5G35590 // AT3G54660 // AT3G12780 // AT3G48990 // AT2G41680 // AT3G63520 // AT1G08830 // AT2G21250 // AT5G62790 // AT3G15730 // AT5G63400 // AT5G58070 // AT2G41530 // AT5G42130 // AT5G18100 // AT2G32080 // AT3G54470 // AT1G70730 // AT1G75950 // AT3G01910 // AT2G05710 // AT1G20340 // AT1G09340 // AT2G45030 // AT1G56190 // AT1G78870 // AT3G20390 // AT3G56090 // AT5G40770 // AT5G52…
GO:0071704	P	organic substance metabolic process	786	1709	10672	28362	4.5e-12	5e-10	// AT2G29210 // AT4G15560 // AT2G39020 // AT5G48230 // AT4G14210 // AT1G76490 // AT3G55750 // AT1G31180 // AT2G31610 // AT2G34630 // AT3G55040 // AT5G57180 // AT2G31810 // AT3G10070 // AT4G34700 // AT1G08200 // AT2G46280 // AT2G32950 // AT3G53870 // AT4G29410 // AT1G09690 // AT3G45300 // AT3G27110 // AT4G11560 // AT1G16280 // AT3G06550 // AT4G16720 // AT4G27820 // AT2G02390 // AT2G32080 // AT1G53…
GO:0016192	P	vesicle-mediated transport	66	1709	397	28362	5.9e-12	6.4e-10	// AT1G03930 // AT3G22845 // AT3G13870 // AT1G10290 // AT2G44100 // AT5G47200 // AT4G35860 // AT3G08530 // AT1G04750 // AT3G07680 // AT3G44340 // AT5G03520 // AT1G75850 // AT5G16830 // AT3G63460 // AT3G25040 // AT1G20110 // AT5G35200 // AT1G02130 // AT1G60070 // AT1G59610 // AT5G12370 // AT2G37550 // AT1G11890 // AT5G58060 // AT1G70490 // AT5G11490 // AT1G60780 // AT5G58030 // AT3G47810 // AT1G21…
GO:0071702	P	organic substance transport	141	1709	1234	28362	6.1e-12	6.5e-10	// AT1G49410 // AT3G21865 // AT3G16270 // AT5G16620 // AT2G47450 // AT4G35860 // AT3G63130 // AT5G16830 // AT1G19770 // AT5G57180 // AT1G71480 // AT2G18710 // AT2G33470 // AT3G11780 // AT4G22540 // AT1G72750 // AT1G04940 // AT4G30600 // AT1G55900 // AT5G20090 // AT5G28750 // AT2G21190 // AT4G17530 // AT3G18890 // AT1G12500 // AT5G11490 // AT4G38790 // AT5G19820 // AT2G15290 // AT2G40730 // AT2G29…
GO:0016053	P	organic acid biosynthetic process	79	1709	531	28362	7.3e-12	7.7e-10	// AT4G01900 // AT3G58990 // AT3G53580 // AT4G29010 // AT2G22230 // AT2G31810 // AT3G54640 // AT1G74040 // AT3G23940 // AT3G53180 // AT1G54580 // AT1G31180 // AT1G67730 // AT5G65780 // AT1G79750 // AT1G79500 // AT3G58610 // AT2G20860 // AT4G35630 // AT3G25770 // AT5G52100 // AT2G33150 // AT1G74910 // AT3G27740 // AT1G80600 // AT1G18500 // AT1G58080 // AT4G25050 // AT2G45790 // AT3G02720 // AT5G14…
GO:0009735	P	response to cytokinin	48	1709	244	28362	3.2e-11	3.4e-09	// AT5G10360 // AT3G10520 // AT1G10470 // AT3G07480 // AT1G17440 // AT3G54640 // AT3G27925 // AT5G42980 // AT4G25130 // AT4G08390 // AT1G04410 // AT4G35630 // AT3G09200 // AT4G25050 // AT1G19770 // AT4G32260 // AT5G58070 // AT1G56070 // AT2G46540 // AT1G12000 // AT4G11150 // AT4G20260 // AT5G49720 // AT3G48990 // AT5G07020 // AT5G53400 // AT1G27320 // AT3G27850 // AT4G33680 // AT1G69690 // AT1G11…
GO:0046394	P	carboxylic acid biosynthetic process	68	1709	438	28362	4.1e-11	4.3e-09	// AT4G01900 // AT3G58990 // AT3G53580 // AT4G29010 // AT2G22230 // AT2G31810 // AT4G33510 // AT1G74040 // AT3G23940 // AT3G53180 // AT1G54580 // AT1G31180 // AT1G67730 // AT5G65780 // AT1G79750 // AT1G79500 // AT3G58610 // AT2G20860 // AT4G35630 // AT3G25770 // AT2G34770 // AT2G33150 // AT1G74910 // AT3G27740 // AT1G80600 // AT1G18500 // AT1G58080 // AT4G25050 // AT2G45790 // AT3G02720 // AT5G14…
GO:0051188	P	cofactor biosynthetic process	46	1709	229	28362	4.5e-11	4.6e-09	// AT5G56860 // AT4G15560 // AT3G63410 // AT2G41680 // AT2G44750 // AT3G12290 // AT4G32180 // AT3G51820 // AT5G18660 // AT2G26670 // AT2G31955 // AT2G34630 // AT1G69740 // AT2G20860 // AT1G55090 // AT1G08520 // AT5G36880 // AT2G26540 // AT5G40850 // AT1G44446 // AT4G01690 // AT3G25860 // AT5G13630 // AT3G20970 // AT4G25080 // AT1G51390 // AT5G50850 // AT2G30390 // AT4G39850 // AT1G21640 // AT1G10…
GO:0050896	P	response to stimulus	495	1709	6250	28362	5.4e-11	5.4e-09	// AT2G32920 // AT1G31180 // AT2G31610 // AT3G14415 // AT3G55040 // AT3G25530 // AT2G46280 // AT2G32950 // AT3G53870 // AT5G42270 // AT3G06550 // AT5G07020 // AT2G32080 // AT1G53320 // AT1G69690 // AT3G23940 // AT3G16670 // AT1G66580 // AT5G21090 // AT1G53240 // AT5G46290 // AT1G56190 // AT3G20390 // AT5G11150 // AT5G14040 // AT5G10010 // AT5G52440 // AT1G03930 // AT2G17840 // AT1G43560 // AT1G59…
GO:0009651	P	response to salt stress	80	1709	574	28362	9.3e-11	9.2e-09	// AT2G47510 // AT4G32150 // AT3G23600 // AT3G52300 // AT5G20080 // AT4G12720 // AT5G23540 // AT4G16830 // AT1G49300 // AT5G24660 // AT4G11600 // AT1G31180 // AT2G31610 // AT4G04330 // AT5G37850 // AT1G15930 // AT3G57290 // AT1G04410 // AT1G08830 // AT1G27320 // AT2G17840 // AT4G01070 // AT4G32410 // AT1G56450 // AT1G57870 // AT2G45790 // AT2G46280 // AT2G47730 // AT2G43090 // AT1G78900 // AT3G53…
GO:0006520	P	cellular amino acid metabolic process	55	1709	320	28362	1.1e-10	1.1e-08	// AT3G58990 // AT3G53580 // AT2G39020 // AT1G71180 // AT5G36160 // AT5G64290 // AT3G13490 // AT1G74040 // AT2G37250 // AT4G31990 // AT1G31180 // AT1G80560 // AT5G65780 // AT3G58610 // AT2G20860 // AT4G35630 // AT5G52100 // AT3G27740 // AT3G53180 // AT1G18500 // AT1G58080 // AT2G31810 // AT5G52520 // AT3G13110 // AT2G43090 // AT1G63660 // AT1G78680 // AT1G75330 // AT3G55610 // AT5G65010 // AT5G16…
GO:0061024	P	membrane organization	42	1709	212	28362	4.5e-10	4.3e-08	// AT1G35680 // AT2G47450 // AT4G31780 // AT5G43970 // AT1G06430 // AT1G04750 // AT5G08050 // AT4G04210 // AT2G01110 // AT3G08580 // AT1G20110 // AT4G14870 // AT2G18710 // AT3G55340 // AT5G40930 // AT1G11890 // AT2G20890 // AT3G17440 // AT4G30600 // AT2G34860 // AT4G20130 // AT5G35220 // AT3G09740 // AT1G65260 // AT5G16830 // AT1G26670 // AT2G33120 // AT2G06530 // AT2G01470 // AT4G32150 // AT4G20…
GO:0022607	P	cellular component assembly	79	1709	586	28362	4.9e-10	4.7e-08	// AT5G58260 // AT3G55770 // AT5G35200 // AT1G53310 // AT1G17440 // AT5G49510 // AT4G39080 // AT5G54290 // AT4G35760 // AT2G23930 // AT5G58230 // AT1G70760 // AT5G08050 // AT3G18035 // AT1G04510 // AT5G42980 // AT1G79750 // AT5G51040 // AT1G26110 // AT1G32990 // AT1G14320 // AT2G36620 // AT1G16720 // AT2G36000 // AT4G10920 // AT1G54500 // AT1G54170 // AT3G10070 // AT3G55340 // AT1G72370 // AT4G38…
GO:1901657	P	glycosyl compound metabolic process	54	1709	326	28362	5.5e-10	5.1e-08	// AT5G40650 // AT3G12780 // AT4G32260 // AT4G32180 // AT4G26510 // AT4G24620 // AT3G02090 // AT2G21330 // AT1G20260 // AT3G52300 // AT4G22930 // AT5G23070 // AT5G56350 // AT5G51040 // AT1G12000 // AT5G08530 // AT1G27320 // AT4G00895 // AT3G13930 // AT1G15120 // AT3G27740 // AT4G38510 // AT4G34700 // AT1G78900 // AT3G52200 // AT3G25860 // AT3G57610 // AT4G27820 // AT2G33040 // AT4G11010 // AT4G02…
GO:0032787	P	monocarboxylic acid metabolic process	69	1709	481	28362	6.2e-10	5.8e-08	// AT3G10520 // AT4G15560 // AT3G12780 // AT5G48230 // AT3G51840 // AT1G08110 // AT3G10850 // AT4G25050 // AT4G24620 // AT4G13840 // AT1G54580 // AT1G08510 // AT1G67730 // AT5G56350 // AT1G79750 // AT2G29390 // AT1G12000 // AT3G06860 // AT5G36880 // AT3G13930 // AT2G33150 // AT5G62790 // AT3G12800 // AT4G29010 // AT3G02720 // AT3G15730 // AT1G54630 // AT3G52200 // AT2G22230 // AT3G02580 // AT3G25…
GO:0022613	P	ribonucleoprotein complex biogenesis	61	1709	399	28362	7.1e-10	6.5e-08	// AT5G10360 // AT4G09730 // AT4G01560 // AT1G32990 // AT1G18080 // AT3G55750 // AT5G03850 // AT4G17560 // AT2G27530 // AT3G16080 // AT1G04510 // AT1G74970 // AT5G02610 // AT1G07070 // AT2G25870 // AT1G14320 // AT1G12650 // AT3G55170 // AT2G36000 // AT1G54170 // AT4G25630 // AT1G72370 // AT3G15190 // AT5G61770 // AT1G16740 // AT4G26230 // AT4G29410 // AT1G74270 // AT3G11500 // AT5G14320 // AT1G16…
GO:0006970	P	response to osmotic stress	83	1709	636	28362	7.2e-10	6.5e-08	// AT2G47510 // AT4G32150 // AT3G23600 // AT3G52300 // AT5G20080 // AT4G12720 // AT5G23540 // AT4G16830 // AT1G49300 // AT5G24660 // AT4G11600 // AT1G31180 // AT2G31610 // AT4G04330 // AT5G37850 // AT1G15930 // AT3G57290 // AT1G04410 // AT1G08830 // AT1G27320 // AT2G17840 // AT4G01070 // AT4G32410 // AT1G56450 // AT5G67590 // AT1G57870 // AT2G45790 // AT2G46280 // AT2G47730 // AT2G43090 // AT1G78…
GO:0008652	P	cellular amino acid biosynthetic process	32	1709	132	28362	7.8e-10	7e-08	// AT3G58990 // AT3G53580 // AT1G18500 // AT1G74040 // AT3G23940 // AT1G31180 // AT5G65780 // AT3G58610 // AT4G35630 // AT5G52100 // AT3G27740 // AT3G53180 // AT2G31810 // AT1G58080 // AT2G43090 // AT1G75330 // AT5G65010 // AT5G53850 // AT4G33680 // AT2G37250 // AT2G37500 // AT4G01900 // AT1G80600 // AT2G43100 // AT4G14710 // AT1G80560 // AT3G48560 // AT5G14060 // AT5G11880 // AT4G17830 // AT3G57…
GO:0015672	P	monovalent inorganic cation transport	38	1709	182	28362	8.4e-10	7.4e-08	// AT3G42050 // AT4G32260 // AT5G64290 // AT2G19680 // AT3G52300 // AT5G12860 // AT4G32530 // AT1G04690 // AT2G25610 // AT4G33530 // AT4G00895 // AT2G16510 // AT4G34720 // AT3G25410 // AT4G02620 // AT4G38510 // AT1G78900 // AT4G11150 // AT4G23710 // AT2G33040 // AT1G19910 // AT1G12840 // AT4G38920 // AT3G28710 // AT5G55290 // AT3G28715 // AT5G13450 // AT4G29480 // AT4G39080 // AT1G20260 // AT2G29…
GO:0006732	P	coenzyme metabolic process	47	1709	264	28362	9.3e-10	8.1e-08	// AT5G24400 // AT3G12780 // AT1G76490 // AT2G44750 // AT3G12290 // AT4G32180 // AT5G58330 // AT4G24620 // AT2G31955 // AT2G21330 // AT2G01350 // AT2G34630 // AT2G20860 // AT1G55090 // AT5G56350 // AT5G36880 // AT3G13930 // AT3G52200 // AT1G78680 // AT5G49970 // AT1G12000 // AT3G25860 // AT5G55070 // AT5G50850 // AT2G01290 // AT4G39850 // AT1G21640 // AT1G79530 // AT1G10670 // AT5G37850 // AT5G42…
GO:0006605	P	protein targeting	41	1709	209	28362	9.3e-10	8.1e-08	// AT1G07140 // AT5G16620 // AT2G47450 // AT1G55900 // AT5G43970 // AT1G04750 // AT3G63130 // AT1G21650 // AT5G49910 // AT5G47040 // AT5G39510 // AT2G45790 // AT1G27970 // AT5G41685 // AT5G57180 // AT4G24920 // AT5G40930 // AT3G47810 // AT1G72750 // AT1G04940 // AT4G35450 // AT3G17440 // AT4G30600 // AT4G02510 // AT4G29380 // AT1G06950 // AT2G24820 // AT5G50810 // AT3G09740 // AT2G45660 // AT5G16…
GO:0043933	P	macromolecular complex subunit organization	92	1709	745	28362	1.1e-09	9.3e-08	// AT1G14400 // AT5G35200 // AT1G52740 // AT2G36000 // AT3G10070 // AT3G18035 // AT2G02760 // AT5G61770 // AT4G38510 // AT5G52470 // AT3G20810 // AT4G04340 // AT3G42790 // AT1G20696 // AT4G35760 // AT3G14010 // AT1G66580 // AT5G25757 // AT2G47210 // AT1G54140 // AT1G66070 // AT2G44525 // AT2G28520 // AT5G03740 // AT3G16640 // AT1G32990 // AT2G36620 // AT2G19520 // AT4G25630 // AT5G42270 // AT3G11…
GO:0044802	P	single-organism membrane organization	34	1709	153	28362	1.6e-09	1.4e-07	// AT1G35680 // AT2G47450 // AT4G31780 // AT5G43970 // AT1G06430 // AT1G04750 // AT5G08050 // AT4G04210 // AT2G01110 // AT3G08580 // AT4G14870 // AT2G18710 // AT5G40930 // AT1G11890 // AT3G17440 // AT4G30600 // AT2G34860 // AT4G20130 // AT3G09740 // AT1G65260 // AT5G16830 // AT1G26670 // AT2G33120 // AT5G35220 // AT4G32150 // AT5G39510 // AT3G13530 // AT5G58060 // AT3G10670 // AT2G20890 // AT1G32…
GO:0019538	P	protein metabolic process	352	1709	4289	28362	2.7e-09	2.3e-07	// AT1G09690 // AT3G55750 // AT2G31610 // AT1G74270 // AT3G10070 // AT2G46280 // AT2G32950 // AT3G53870 // AT5G42620 // AT4G29410 // AT3G27110 // AT4G16720 // AT1G66580 // AT4G33250 // AT4G33090 // AT1G66070 // AT1G33120 // AT1G09850 // AT5G02450 // AT1G03930 // AT1G18080 // AT2G05920 // AT2G40730 // AT2G05840 // AT4G15420 // AT3G51370 // AT4G25630 // AT1G71220 // AT4G20850 // AT3G55530 // AT1G70…
GO:0009658	P	chloroplast organization	33	1709	150	28362	3.5e-09	2.9e-07	// AT1G49510 // AT1G35680 // AT5G16620 // AT3G52750 // AT2G48120 // AT3G23400 // AT5G24660 // AT2G36250 // AT1G21650 // AT5G08050 // AT5G51020 // AT2G25870 // AT2G36000 // AT2G43090 // AT2G24060 // AT2G47940 // AT2G32480 // AT3G07430 // AT2G28000 // AT5G64050 // AT1G06950 // AT4G20130 // AT5G45390 // AT2G21170 // AT3G27750 // AT4G16390 // AT1G09340 // AT4G22260 // AT5G13770 // AT5G46290 // AT5G55…
GO:0015980	P	energy derivation by oxidation of organic compounds	32	1709	146	28362	6.5e-09	5.3e-07	// AT2G47510 // AT5G40650 // AT1G53310 // AT5G58330 // AT4G38680 // AT3G02090 // AT5G19220 // AT3G09810 // AT1G04410 // AT5G08530 // AT4G35260 // AT2G39930 // AT2G46505 // AT5G52840 // AT5G51040 // AT2G36390 // AT1G15120 // AT1G23190 // AT5G55070 // AT3G06310 // AT4G35830 // AT1G53240 // AT1G22840 // AT1G70730 // AT5G18800 // AT2G05710 // AT4G34700 // AT4G02580 // AT5G66760 // AT3G29320 // AT4G01…
GO:0044238	P	primary metabolic process	713	1709	9890	28362	7.3e-09	5.9e-07	// AT2G29210 // AT4G15560 // AT2G39020 // AT5G48230 // AT4G14210 // AT1G76490 // AT3G55750 // AT1G31180 // AT2G31610 // AT2G34630 // AT3G55040 // AT5G57180 // AT2G31810 // AT3G10070 // AT4G34700 // AT1G08200 // AT2G46280 // AT2G32950 // AT3G53870 // AT4G29410 // AT1G09690 // AT3G45300 // AT3G27110 // AT4G11560 // AT1G16280 // AT3G06550 // AT4G16720 // AT4G27820 // AT2G32080 // AT1G53320 // AT1G69…
GO:0033365	P	protein localization to organelle	40	1709	221	28362	1.1e-08	8.7e-07	// AT1G07140 // AT5G16620 // AT2G47450 // AT4G26670 // AT1G55900 // AT5G43970 // AT3G63130 // AT1G71480 // AT5G49910 // AT5G47040 // AT3G25040 // AT5G39510 // AT5G40930 // AT1G27970 // AT5G41685 // AT5G57180 // AT2G45790 // AT5G16830 // AT3G47810 // AT1G72750 // AT1G04940 // AT4G35450 // AT3G17440 // AT4G30600 // AT4G02510 // AT2G21190 // AT4G29380 // AT1G06950 // AT2G24820 // AT5G50810 // AT5G24…
GO:0006793	P	phosphorus metabolic process	168	1709	1751	28362	1.2e-08	9.3e-07	// AT4G15560 // AT5G05200 // AT3G12780 // AT4G02420 // AT1G76490 // AT3G55610 // AT2G31955 // AT3G54690 // AT5G23070 // AT5G56350 // AT1G55090 // AT4G00895 // AT5G26751 // AT1G34430 // AT5G62790 // AT4G25050 // AT1G07110 // AT3G25860 // AT4G34700 // AT5G65050 // AT5G48545 // AT3G06310 // AT5G50850 // AT2G01290 // AT3G54470 // AT4G23180 // AT5G52200 // AT2G26980 // AT3G57650 // AT3G08680 // AT1G54…
GO:0065003	P	macromolecular complex assembly	60	1709	424	28362	1.3e-08	9.9e-07	// AT5G58260 // AT1G49380 // AT5G35200 // AT1G53310 // AT1G17440 // AT5G49510 // AT4G39080 // AT5G54290 // AT4G35760 // AT2G23930 // AT1G70760 // AT1G04510 // AT5G42980 // AT1G79750 // AT5G51040 // AT1G32990 // AT1G14320 // AT2G36620 // AT2G33340 // AT4G10920 // AT1G54500 // AT1G54170 // AT3G10070 // AT3G18035 // AT1G72370 // AT4G38510 // AT5G42270 // AT5G61770 // AT1G48620 // AT3G11500 // AT2G20…
GO:0006812	P	cation transport	54	1709	362	28362	1.4e-08	1.1e-06	// AT3G42050 // AT4G23710 // AT4G32260 // AT5G64290 // AT2G19680 // AT3G52300 // AT5G12860 // AT4G32530 // AT1G04690 // AT2G25610 // AT4G33530 // AT1G27320 // AT4G00895 // AT2G16510 // AT4G29900 // AT4G32060 // AT4G34720 // AT3G25410 // AT4G02620 // AT4G38510 // AT5G22830 // AT1G78900 // AT1G47240 // AT4G11150 // AT2G38270 // AT2G40300 // AT4G33520 // AT5G42130 // AT2G33040 // AT1G19910 // AT4G04…
GO:0006796	P	phosphate-containing compound metabolic process	166	1709	1735	28362	1.7e-08	1.3e-06	// AT4G15560 // AT5G05200 // AT3G12780 // AT4G02420 // AT1G76490 // AT3G55610 // AT2G31955 // AT3G54690 // AT5G23070 // AT5G56350 // AT1G55090 // AT4G00895 // AT5G26751 // AT1G34430 // AT5G62790 // AT4G25050 // AT1G07110 // AT3G25860 // AT5G65050 // AT5G48545 // AT3G06310 // AT5G50850 // AT2G01290 // AT3G54470 // AT4G23180 // AT5G52200 // AT2G26980 // AT3G57650 // AT3G08680 // AT1G54630 // AT4G00…
GO:0019725	P	cellular homeostasis	49	1709	314	28362	1.9e-08	1.4e-06	// AT5G56860 // AT3G13772 // AT3G54660 // AT1G43560 // AT2G32920 // AT2G41680 // AT4G22220 // AT5G54290 // AT1G07960 // AT3G26060 // AT3G59820 // AT4G38920 // AT5G42980 // AT4G03520 // AT5G60640 // AT4G36910 // AT1G67740 // AT4G32060 // AT4G34720 // AT2G28520 // AT1G76080 // AT5G20500 // AT5G58070 // AT4G29670 // AT3G17240 // AT4G10000 // AT1G56500 // AT3G11630 // AT2G38270 // AT2G40300 // AT3G06…
GO:1902578	P	single-organism localization	112	1709	1040	28362	1.9e-08	1.5e-06	// AT5G16620 // AT2G47450 // AT3G63130 // AT4G32530 // AT1G69960 // AT2G25610 // AT4G00895 // AT4G14870 // AT2G18710 // AT2G33470 // AT5G12370 // AT4G22540 // AT4G23710 // AT1G72750 // AT1G04940 // AT4G11150 // AT4G30600 // AT5G28750 // AT2G21190 // AT1G19910 // AT1G12500 // AT4G29480 // AT4G38790 // AT5G19820 // AT2G15290 // AT3G56090 // AT4G33090 // AT2G40730 // AT4G26710 // AT2G28520 // AT1G71…
GO:0042221	P	response to chemical	247	1709	2853	28362	1.9e-08	1.5e-06	// AT1G33240 // AT5G20570 // AT3G54660 // AT3G12780 // AT2G41680 // AT3G07480 // AT5G35590 // AT4G16830 // AT3G55610 // AT3G63520 // AT1G70730 // AT3G62030 // AT1G08830 // AT3G55040 // AT2G21250 // AT5G62790 // AT1G54990 // AT2G30970 // AT3G15730 // AT4G25050 // AT5G63400 // AT5G58070 // AT4G11150 // AT3G01130 // AT2G41530 // AT5G49720 // AT5G42130 // AT5G07020 // AT1G17440 // AT1G16880 // AT5G18…
GO:0042440	P	pigment metabolic process	35	1709	181	28362	2.1e-08	1.6e-06	// AT5G56860 // AT4G15560 // AT4G14210 // AT2G41680 // AT3G51820 // AT2G48120 // AT5G18660 // AT2G26670 // AT1G69740 // AT4G01690 // AT1G27320 // AT1G08520 // AT4G13250 // AT2G26540 // AT2G20570 // AT5G40850 // AT1G44446 // AT1G71220 // AT2G32950 // AT3G10230 // AT1G09830 // AT5G06130 // AT5G13630 // AT3G04870 // AT4G25080 // AT5G17230 // AT5G57030 // AT2G30390 // AT1G69690 // AT1G10670 // AT4G31…
GO:0006733	P	oxidoreduction coenzyme metabolic process	29	1709	130	28362	2.3e-08	1.7e-06	// AT3G12780 // AT5G58330 // AT4G24620 // AT2G21330 // AT2G01350 // AT2G34630 // AT3G52200 // AT1G55090 // AT5G56350 // AT3G13930 // AT5G49970 // AT1G12000 // AT3G25860 // AT5G50850 // AT2G01290 // AT4G39850 // AT1G21640 // AT1G79530 // AT5G24400 // AT5G42740 // AT1G79550 // AT3G52990 // AT1G34430 // AT2G21170 // AT5G44520 // AT1G56190 // AT4G29130 // AT2G03690 // AT1G04410
GO:0042254	P	ribosome biogenesis	51	1709	341	28362	3.2e-08	2.4e-06	// AT5G10360 // AT4G09730 // AT4G01560 // AT1G32990 // AT1G18080 // AT3G55750 // AT5G03850 // AT4G17560 // AT2G27530 // AT3G16080 // AT1G74970 // AT5G02610 // AT1G07070 // AT2G25870 // AT1G14320 // AT1G12650 // AT3G55170 // AT2G36000 // AT4G25630 // AT1G72370 // AT5G61770 // AT1G16740 // AT4G26230 // AT4G29410 // AT1G74270 // AT1G48350 // AT5G14320 // AT1G16280 // AT5G52470 // AT3G09200 // AT3G13…
GO:0072524	P	pyridine-containing compound metabolic process	28	1709	125	28362	3.8e-08	2.7e-06	// AT3G12780 // AT5G58330 // AT2G21330 // AT2G01350 // AT5G56350 // AT3G52200 // AT1G55090 // AT4G24620 // AT3G13930 // AT5G49970 // AT1G12000 // AT3G25860 // AT5G50850 // AT2G01290 // AT1G21640 // AT1G79530 // AT5G24400 // AT5G37850 // AT5G42740 // AT1G79550 // AT3G52990 // AT1G34430 // AT2G21170 // AT5G44520 // AT1G56190 // AT4G29130 // AT1G04410 // AT5G53580
GO:0006778	P	porphyrin-containing compound metabolic process	24	1709	97	28362	7.1e-08	5.1e-06	// AT5G56860 // AT4G15560 // AT2G41680 // AT3G51820 // AT5G18660 // AT2G26670 // AT1G69740 // AT4G01690 // AT1G27320 // AT1G08520 // AT4G13250 // AT2G26540 // AT5G40850 // AT1G44446 // AT1G04620 // AT2G20890 // AT5G13630 // AT4G25080 // AT2G30390 // AT1G10670 // AT4G31390 // AT3G01910 // AT2G20570 // AT2G40400
GO:0072594	P	establishment of protein localization to organelle	35	1709	192	28362	7.6e-08	5.3e-06	// AT1G07140 // AT5G16620 // AT2G47450 // AT1G55900 // AT5G43970 // AT3G63130 // AT1G71480 // AT5G49910 // AT5G47040 // AT5G39510 // AT5G40930 // AT1G27970 // AT5G41685 // AT5G57180 // AT2G45790 // AT3G47810 // AT1G72750 // AT1G04940 // AT4G35450 // AT3G17440 // AT4G30600 // AT4G02510 // AT4G29380 // AT1G06950 // AT2G24820 // AT5G50810 // AT2G45660 // AT5G16830 // AT1G26670 // AT5G19820 // AT2G14…
GO:0045454	P	cell redox homeostasis	30	1709	147	28362	7.5e-08	5.3e-06	// AT2G32920 // AT3G54660 // AT1G43560 // AT2G41680 // AT5G54290 // AT1G07960 // AT3G26060 // AT5G42980 // AT4G03520 // AT4G36910 // AT1G76080 // AT5G20500 // AT4G10000 // AT4G29670 // AT3G17240 // AT1G56500 // AT3G11630 // AT2G38270 // AT5G60640 // AT1G03680 // AT3G52960 // AT3G06050 // AT1G67740 // AT3G16110 // AT5G40370 // AT1G53300 // AT5G03880 // AT5G06290 // AT1G50320 // AT5G16400
GO:0033013	P	tetrapyrrole metabolic process	24	1709	98	28362	8.4e-08	5.8e-06	// AT5G56860 // AT4G15560 // AT2G41680 // AT3G51820 // AT5G18660 // AT2G26670 // AT1G69740 // AT4G01690 // AT1G27320 // AT1G08520 // AT4G13250 // AT2G26540 // AT5G40850 // AT1G44446 // AT1G04620 // AT2G20890 // AT5G13630 // AT4G25080 // AT2G30390 // AT1G10670 // AT4G31390 // AT3G01910 // AT2G20570 // AT2G40400
GO:0006090	P	pyruvate metabolic process	23	1709	91	28362	9.6e-08	6.5e-06	// AT4G15560 // AT3G12780 // AT2G21330 // AT4G24620 // AT1G79750 // AT3G52200 // AT5G56350 // AT3G13930 // AT5G62790 // AT1G12000 // AT3G25860 // AT4G13830 // AT5G50850 // AT1G79530 // AT5G42740 // AT1G79550 // AT3G52990 // AT2G02500 // AT1G34430 // AT2G21170 // AT4G00570 // AT1G56190 // AT4G29130
GO:0034622	P	cellular macromolecular complex assembly	52	1709	365	28362	9.6e-08	6.5e-06	// AT5G58260 // AT1G49380 // AT5G35200 // AT1G17440 // AT5G49510 // AT4G39080 // AT5G54290 // AT4G35760 // AT2G23930 // AT1G70760 // AT1G04510 // AT1G32990 // AT5G51040 // AT1G14320 // AT2G36620 // AT2G33340 // AT3G60370 // AT1G54500 // AT1G54170 // AT3G10070 // AT3G18035 // AT1G72370 // AT4G38510 // AT5G42270 // AT5G61770 // AT1G48620 // AT3G11500 // AT2G20890 // AT4G20260 // AT4G01560 // AT1G76…
GO:1901605	P	alpha-amino acid metabolic process	40	1709	242	28362	9.6e-08	6.5e-06	// AT3G53580 // AT5G36160 // AT5G64290 // AT3G54640 // AT1G17290 // AT3G55610 // AT5G65780 // AT3G58610 // AT2G20860 // AT4G35630 // AT5G52100 // AT3G27740 // AT5G55070 // AT2G31810 // AT3G13110 // AT1G63660 // AT5G48220 // AT1G78680 // AT1G75330 // AT3G62030 // AT5G65010 // AT3G53180 // AT4G33680 // AT3G20390 // AT3G23940 // AT5G12860 // AT2G29690 // AT2G37500 // AT4G01900 // AT1G80600 // AT4G32…
GO:0046496	P	nicotinamide nucleotide metabolic process	26	1709	115	28362	9.7e-08	6.5e-06	// AT3G12780 // AT5G58330 // AT2G21330 // AT2G01350 // AT5G56350 // AT3G52200 // AT1G55090 // AT4G24620 // AT3G13930 // AT5G49970 // AT1G12000 // AT3G25860 // AT5G50850 // AT2G01290 // AT1G21640 // AT1G79530 // AT5G24400 // AT5G42740 // AT1G79550 // AT3G52990 // AT1G34430 // AT2G21170 // AT5G44520 // AT1G56190 // AT4G29130 // AT1G04410
GO:0090407	P	organophosphate biosynthetic process	45	1709	293	28362	1e-07	6.9e-06	// AT4G00400 // AT4G15560 // AT4G32260 // AT1G76490 // AT2G44750 // AT4G32180 // AT1G80860 // AT4G26510 // AT2G31955 // AT1G54580 // AT3G52300 // AT2G01350 // AT4G22930 // AT1G55090 // AT4G00895 // AT2G44620 // AT2G45670 // AT5G62790 // AT3G27740 // AT4G25050 // AT1G32200 // AT2G38700 // AT1G09830 // AT2G35040 // AT4G13830 // AT3G18680 // AT5G58560 // AT3G57610 // AT4G11010 // AT3G54470 // AT1G21…
GO:0006950	P	response to stress	288	1709	3506	28362	1.1e-07	6.9e-06	// AT3G11660 // AT1G14400 // AT3G60820 // AT3G23600 // AT3G12780 // AT2G32920 // AT2G22230 // AT4G02420 // AT2G41680 // AT4G16830 // AT3G23940 // AT4G39960 // AT3G54660 // AT5G49720 // AT1G31180 // AT2G31610 // AT5G42900 // AT5G23070 // AT3G57290 // AT3G14415 // AT3G62030 // AT1G52740 // AT2G45790 // AT3G26744 // AT1G80600 // AT3G25530 // AT4G26840 // AT1G71220 // AT4G25050 // AT5G50250 // AT2G46…
GO:0044765	P	single-organism transport	106	1709	1004	28362	1.2e-07	7.5e-06	// AT5G16620 // AT2G47450 // AT3G63130 // AT4G32530 // AT1G69960 // AT2G25610 // AT4G00895 // AT4G14870 // AT2G18710 // AT2G33470 // AT5G12370 // AT4G22540 // AT4G23710 // AT1G72750 // AT1G04940 // AT4G11150 // AT4G30600 // AT5G28750 // AT1G19910 // AT1G12500 // AT2G15290 // AT5G19820 // AT4G29480 // AT4G33090 // AT2G40730 // AT4G26710 // AT2G28520 // AT1G71480 // AT5G11150 // AT3G01130 // AT5G52…
GO:0019362	P	pyridine nucleotide metabolic process	26	1709	117	28362	1.3e-07	8.4e-06	// AT3G12780 // AT5G58330 // AT2G21330 // AT2G01350 // AT5G56350 // AT3G52200 // AT1G55090 // AT4G24620 // AT3G13930 // AT5G49970 // AT1G12000 // AT3G25860 // AT5G50850 // AT2G01290 // AT1G21640 // AT1G79530 // AT5G24400 // AT5G42740 // AT1G79550 // AT3G52990 // AT1G34430 // AT2G21170 // AT5G44520 // AT1G56190 // AT4G29130 // AT1G04410
GO:0019684	P	photosynthesis, light reaction	28	1709	134	28362	1.3e-07	8.5e-06	// AT4G27800 // AT1G75690 // AT1G06430 // AT1G70760 // AT3G27925 // AT4G30950 // AT5G52100 // AT3G60370 // AT1G54500 // AT4G01050 // AT5G42270 // AT1G54780 // AT2G47940 // AT2G20890 // AT4G33520 // AT1G67740 // AT5G57030 // AT4G18370 // AT3G01440 // AT4G35760 // AT5G01500 // AT1G03600 // AT4G35250 // AT3G54050 // AT1G16720 // AT1G45474 // AT5G01920 // AT5G35220
GO:0010027	P	thylakoid membrane organization	15	1709	38	28362	1.6e-07	1e-05	// AT2G01110 // AT4G14870 // AT1G35680 // AT2G18710 // AT2G34860 // AT1G06430 // AT4G20130 // AT3G10670 // AT5G08050 // AT1G32500 // AT1G65260 // AT5G35220 // AT4G31780 // AT2G20890 // AT5G12130
GO:0098662	P	inorganic cation transmembrane transport	30	1709	153	28362	1.6e-07	1e-05	// AT3G42050 // AT4G32260 // AT4G33530 // AT3G52300 // AT4G32530 // AT4G38920 // AT2G25610 // AT4G00895 // AT2G16510 // AT4G29900 // AT4G34720 // AT4G02620 // AT4G38510 // AT1G78900 // AT4G11150 // AT4G33520 // AT2G33040 // AT1G19910 // AT5G57110 // AT1G12840 // AT5G55290 // AT3G28715 // AT5G13450 // AT3G28710 // AT4G39080 // AT1G20260 // AT4G26710 // AT2G28520 // AT5G20650 // AT1G75630
GO:0009668	P	plastid membrane organization	15	1709	39	28362	2.1e-07	1.3e-05	// AT2G01110 // AT4G14870 // AT1G35680 // AT2G18710 // AT2G34860 // AT1G06430 // AT4G20130 // AT3G10670 // AT5G08050 // AT1G32500 // AT1G65260 // AT5G35220 // AT4G31780 // AT2G20890 // AT5G12130
GO:0022900	P	electron transport chain	25	1709	112	28362	2.1e-07	1.3e-05	// AT5G40650 // AT1G06430 // AT3G02090 // AT1G70760 // AT4G30950 // AT5G51040 // AT5G08530 // AT1G15120 // AT5G52840 // AT4G01050 // AT1G32550 // AT5G42270 // AT5G67590 // AT4G33520 // AT3G06310 // AT1G67740 // AT4G27800 // AT1G22840 // AT3G01440 // AT5G18800 // AT4G34700 // AT4G02580 // AT5G66760 // AT3G54050 // AT3G27380
GO:0044255	P	cellular lipid metabolic process	76	1709	649	28362	2.1e-07	1.3e-05	// AT3G10520 // AT4G00400 // AT4G15560 // AT5G48230 // AT3G51840 // AT4G14210 // AT1G76490 // AT3G56040 // AT1G80860 // AT2G48120 // AT4G13840 // AT1G07420 // AT2G26670 // AT1G08510 // AT3G63520 // AT1G67730 // AT2G34630 // AT1G79750 // AT1G79500 // AT2G29390 // AT2G20860 // AT3G06860 // AT5G36880 // AT2G34770 // AT2G33150 // AT5G62790 // AT3G12800 // AT4G31780 // AT4G29010 // AT3G15730 // AT1G54…
GO:0046148	P	pigment biosynthetic process	29	1709	148	28362	2.6e-07	1.6e-05	// AT5G56860 // AT4G15560 // AT4G14210 // AT2G41680 // AT3G51820 // AT2G48120 // AT5G18660 // AT2G26670 // AT1G69740 // AT4G01690 // AT1G08520 // AT2G26540 // AT5G40850 // AT1G44446 // AT3G10230 // AT1G09830 // AT5G06130 // AT5G13630 // AT3G04870 // AT4G25080 // AT5G17230 // AT5G57030 // AT2G30390 // AT1G69690 // AT1G10670 // AT4G01900 // AT4G22260 // AT2G20570 // AT2G40400
GO:0098660	P	inorganic ion transmembrane transport	32	1709	178	28362	3.5e-07	2.1e-05	// AT3G42050 // AT4G32260 // AT4G33530 // AT3G52300 // AT4G32530 // AT4G38920 // AT2G25610 // AT4G00895 // AT2G16510 // AT4G29900 // AT4G34720 // AT4G02620 // AT4G38510 // AT1G78900 // AT4G11150 // AT4G33520 // AT2G33040 // AT1G19910 // AT5G57110 // AT1G12840 // AT5G55290 // AT3G28715 // AT5G13450 // AT3G28710 // AT4G39080 // AT1G20260 // AT4G26710 // AT2G28520 // AT5G20650 // AT1G75630 // AT5G49…
GO:0044249	P	cellular biosynthetic process	442	1709	5870	28362	3.8e-07	2.3e-05	// AT4G15560 // AT5G48230 // AT4G14210 // AT1G76490 // AT3G55750 // AT1G31180 // AT2G31610 // AT2G34630 // AT3G14415 // AT5G57180 // AT2G33220 // AT2G31810 // AT3G10070 // AT1G08200 // AT2G46280 // AT3G53870 // AT4G29410 // AT1G09690 // AT4G11560 // AT3G06550 // AT4G16720 // AT2G32080 // AT1G53320 // AT1G69690 // AT3G23940 // AT1G66580 // AT4G33250 // AT3G57650 // AT1G66070 // AT1G33120 // AT5G46…
GO:0006508	P	proteolysis	96	1709	907	28362	4.2e-07	2.5e-05	// AT1G14400 // AT3G60820 // AT5G35590 // AT4G04210 // AT3G14240 // AT3G08690 // AT2G02760 // AT2G31440 // AT3G27110 // AT1G79210 // AT5G06600 // AT1G75950 // AT1G02305 // AT3G52640 // AT1G76140 // AT1G63770 // AT5G38470 // AT5G60360 // AT5G22000 // AT1G78870 // AT4G17830 // AT1G79110 // AT1G09850 // AT4G35880 // AT4G33090 // AT2G05920 // AT2G05840 // AT4G30920 // AT1G51980 // AT2G20725 // AT3G15…
GO:0015994	P	chlorophyll metabolic process	21	1709	85	28362	4.7e-07	2.8e-05	// AT4G01690 // AT5G56860 // AT1G27320 // AT1G08520 // AT4G13250 // AT2G26540 // AT2G20570 // AT4G25080 // AT2G41680 // AT3G01910 // AT3G51820 // AT5G18660 // AT1G44446 // AT1G69740 // AT1G10670 // AT1G04620 // AT4G15560 // AT2G40400 // AT4G31390 // AT2G20890 // AT5G13630
GO:0009058	P	biosynthetic process	466	1709	6255	28362	5.1e-07	3e-05	// AT4G15560 // AT5G48230 // AT4G14210 // AT1G76490 // AT3G55750 // AT1G31180 // AT2G31610 // AT2G34630 // AT3G14415 // AT5G57180 // AT2G33220 // AT2G31810 // AT3G10070 // AT1G08200 // AT2G46280 // AT2G32950 // AT3G53870 // AT4G29410 // AT1G09690 // AT4G11560 // AT3G06550 // AT4G16720 // AT2G32080 // AT1G53320 // AT1G69690 // AT3G23940 // AT1G66580 // AT4G33250 // AT3G57650 // AT1G66070 // AT1G33…
GO:1901607	P	alpha-amino acid biosynthetic process	29	1709	154	28362	5.4e-07	3.1e-05	// AT3G53580 // AT3G54640 // AT2G29690 // AT3G55610 // AT5G65780 // AT3G58610 // AT3G62030 // AT4G35630 // AT1G80600 // AT3G27740 // AT2G31810 // AT3G13110 // AT1G75330 // AT5G65010 // AT3G53180 // AT4G33680 // AT3G20390 // AT3G23940 // AT2G37500 // AT4G01900 // AT5G52100 // AT4G14710 // AT5G53850 // AT3G48560 // AT5G14060 // AT5G11880 // AT4G17830 // AT3G57560 // AT4G02610
GO:0045333	P	cellular respiration	26	1709	128	28362	5.9e-07	3.4e-05	// AT2G47510 // AT5G40650 // AT1G53310 // AT5G58330 // AT4G38680 // AT3G02090 // AT3G09810 // AT1G04410 // AT5G08530 // AT4G35260 // AT2G46505 // AT5G52840 // AT4G34700 // AT1G15120 // AT5G55070 // AT3G06310 // AT4G35830 // AT1G53240 // AT1G22840 // AT5G18800 // AT5G51040 // AT2G05710 // AT4G02580 // AT5G66760 // AT4G01100 // AT3G27380
GO:0044267	P	cellular protein metabolic process	305	1709	3841	28362	7.4e-07	4.3e-05	// AT1G14400 // AT5G20570 // AT2G35050 // AT3G13490 // AT3G12780 // AT1G75690 // AT1G09690 // AT3G55750 // AT3G60820 // AT4G00810 // AT5G52520 // AT4G16390 // AT2G27530 // AT3G51370 // AT2G31610 // AT2G31955 // AT4G04210 // AT3G62030 // AT2G45790 // AT5G66680 // AT3G26744 // AT3G58500 // AT2G04390 // AT2G05220 // AT1G71220 // AT3G10070 // AT3G08690 // AT2G02760 // AT1G51805 // AT2G46280 // AT2G32…
GO:0006081	P	cellular aldehyde metabolic process	18	1709	65	28362	7.6e-07	4.3e-05	// AT2G41530 // AT4G13830 // AT2G21170 // AT5G62790 // AT1G08110 // AT3G10850 // AT4G36250 // AT2G02500 // AT5G44520 // AT5G43940 // AT2G01290 // AT4G34240 // AT2G21330 // AT5G24400 // AT3G02720 // AT4G15560 // AT5G53580 // AT5G49970
GO:0034220	P	ion transmembrane transport	39	1709	255	28362	7.9e-07	4.5e-05	// AT3G42050 // AT4G32260 // AT5G64290 // AT4G33530 // AT3G52300 // AT4G38920 // AT4G32530 // AT1G04690 // AT2G25610 // AT4G00895 // AT2G16510 // AT4G29900 // AT4G34720 // AT3G04090 // AT4G02620 // AT4G38510 // AT1G78900 // AT4G11150 // AT4G33520 // AT5G20090 // AT2G33040 // AT1G75630 // AT1G19910 // AT5G57110 // AT1G12840 // AT5G12860 // AT5G55290 // AT3G28715 // AT5G13450 // AT3G28710 // AT4G39…
GO:1901575	P	organic substance catabolic process	121	1709	1249	28362	9.3e-07	5.2e-05	// AT1G14400 // AT3G60820 // AT3G08510 // AT3G12780 // AT5G48230 // AT5G35590 // AT3G63520 // AT5G56350 // AT4G04210 // AT2G20860 // AT1G34430 // AT4G29010 // AT3G15730 // AT3G08690 // AT2G02760 // AT3G25860 // AT3G45300 // AT5G42270 // AT2G41530 // AT5G49720 // AT2G02390 // AT5G50850 // AT1G70730 // AT1G79210 // AT1G06290 // AT5G06600 // AT1G75950 // AT1G02305 // AT1G09340 // AT5G12200 // AT5G38…
GO:0042775	P	mitochondrial ATP synthesis coupled electron transport	12	1709	28	28362	1.4e-06	7.7e-05	// AT5G08530 // AT5G40650 // AT1G15120 // AT3G06310 // AT4G02580 // AT5G66760 // AT3G02090 // AT1G22840 // AT4G34700 // AT3G27380 // AT5G18800 // AT5G51040
GO:0098655	P	cation transmembrane transport	30	1709	172	28362	1.4e-06	7.8e-05	// AT3G42050 // AT4G32260 // AT4G33530 // AT3G52300 // AT4G32530 // AT4G38920 // AT2G25610 // AT4G00895 // AT2G16510 // AT4G29900 // AT4G34720 // AT4G02620 // AT4G38510 // AT1G78900 // AT4G11150 // AT4G33520 // AT2G33040 // AT1G19910 // AT5G57110 // AT1G12840 // AT5G55290 // AT3G28715 // AT5G13450 // AT3G28710 // AT4G39080 // AT1G20260 // AT4G26710 // AT2G28520 // AT5G20650 // AT1G75630
GO:0006631	P	fatty acid metabolic process	38	1709	252	28362	1.5e-06	8.1e-05	// AT3G10520 // AT4G29010 // AT3G51840 // AT4G13840 // AT1G54580 // AT1G08510 // AT1G67730 // AT1G79750 // AT2G29390 // AT2G20860 // AT3G06860 // AT5G36880 // AT2G34770 // AT2G33150 // AT3G12800 // AT5G48230 // AT3G15730 // AT4G25050 // AT2G22230 // AT5G13520 // AT2G44620 // AT1G52670 // AT4G30950 // AT1G07420 // AT4G04320 // AT3G02580 // AT1G54630 // AT4G39850 // AT5G16390 // AT1G10670 // AT4G01…
GO:0010206	P	photosystem II repair	9	1709	13	28362	1.5e-06	8.4e-05	// AT1G75690 // AT2G47940 // AT4G18370 // AT1G06430 // AT5G42270 // AT1G54780 // AT3G27925 // AT5G01500 // AT1G03600
GO:0008610	P	lipid biosynthetic process	62	1709	522	28362	1.8e-06	9.9e-05	// AT1G50430 // AT4G00400 // AT4G15560 // AT5G48230 // AT2G22230 // AT4G14210 // AT1G76490 // AT3G56040 // AT1G80860 // AT2G48120 // AT4G13840 // AT2G26670 // AT1G08510 // AT1G67730 // AT2G34630 // AT1G79750 // AT1G79500 // AT2G29390 // AT2G20860 // AT1G54630 // AT2G34770 // AT2G45670 // AT5G62790 // AT4G31780 // AT1G07420 // AT3G10520 // AT4G25050 // AT4G34640 // AT4G01900 // AT5G13520 // AT2G38…
GO:0009266	P	response to temperature stimulus	65	1709	559	28362	2e-06	0.00011	// AT4G31990 // AT3G53460 // AT3G12780 // AT5G65060 // AT5G23070 // AT5G53400 // AT4G38680 // AT4G39960 // AT5G52310 // AT5G49910 // AT4G04330 // AT5G42900 // AT5G17020 // AT5G42980 // AT1G31812 // AT1G52740 // AT1G27320 // AT2G17840 // AT3G26744 // AT4G34150 // AT4G26840 // AT1G03680 // AT5G38470 // AT2G37220 // AT2G47730 // AT4G35790 // AT5G12140 // AT5G58070 // AT3G11630 // AT4G11150 // AT4G20…
GO:0044724	P	single-organism carbohydrate catabolic process	21	1709	95	28362	2.2e-06	0.00012	// AT4G24620 // AT5G42740 // AT1G79550 // AT3G52990 // AT1G23190 // AT2G21170 // AT3G13930 // AT2G40840 // AT5G50850 // AT3G52200 // AT3G29320 // AT2G21330 // AT1G56190 // AT1G70730 // AT4G29130 // AT1G79530 // AT3G12780 // AT1G34430 // AT3G25860 // AT5G56350 // AT1G12000
GO:0043648	P	dicarboxylic acid metabolic process	18	1709	71	28362	2.2e-06	0.00012	// AT2G47510 // AT3G53580 // AT3G48990 // AT5G52100 // AT5G64290 // AT4G33680 // AT4G33510 // AT5G58330 // AT5G10870 // AT1G53240 // AT5G14060 // AT5G11880 // AT5G12040 // AT2G01350 // AT5G12860 // AT1G79750 // AT4G00570 // AT1G04410
GO:0033014	P	tetrapyrrole biosynthetic process	18	1709	71	28362	2.2e-06	0.00012	// AT4G01690 // AT5G56860 // AT1G08520 // AT4G15560 // AT2G26540 // AT2G20570 // AT2G41680 // AT5G40850 // AT3G51820 // AT2G30390 // AT5G18660 // AT2G26670 // AT1G44446 // AT1G10670 // AT4G25080 // AT2G40400 // AT1G69740 // AT5G13630
GO:0042742	P	defense response to bacterium	47	1709	354	28362	2.3e-06	0.00012	// AT4G12720 // AT4G32260 // AT4G02420 // AT2G34690 // AT3G23400 // AT5G24660 // AT1G79380 // AT1G04510 // AT3G14415 // AT3G62030 // AT1G52740 // AT1G08830 // AT1G27320 // AT1G80600 // AT2G33340 // AT4G01050 // AT5G14740 // AT3G17210 // AT2G47730 // AT3G14150 // AT5G48810 // AT4G35450 // AT4G23180 // AT4G11150 // AT4G20260 // AT4G18760 // AT5G18650 // AT3G52960 // AT3G27850 // AT3G54640 // AT1G53…
GO:0030091	P	protein repair	11	1709	24	28362	2.3e-06	0.00012	// AT5G01500 // AT1G75690 // AT2G47940 // AT4G18370 // AT1G06430 // AT5G42270 // AT1G54780 // AT3G27925 // AT1G53670 // AT1G03600 // AT5G50240
GO:0009060	P	aerobic respiration	17	1709	64	28362	2.5e-06	0.00013	// AT2G47510 // AT5G40650 // AT4G35260 // AT1G53310 // AT5G55070 // AT2G05710 // AT5G58330 // AT4G35830 // AT5G66760 // AT1G53240 // AT3G02090 // AT3G09810 // AT4G01100 // AT2G46505 // AT3G27380 // AT5G51040 // AT1G04410
GO:0006099	P	tricarboxylic acid cycle	15	1709	50	28362	2.7e-06	0.00014	// AT2G47510 // AT5G40650 // AT4G35260 // AT1G53310 // AT5G55070 // AT2G05710 // AT5G58330 // AT4G35830 // AT5G66760 // AT1G53240 // AT3G09810 // AT2G46505 // AT3G27380 // AT5G51040 // AT1G04410
GO:0042592	P	homeostatic process	63	1709	542	28362	2.9e-06	0.00015	// AT5G56860 // AT3G13772 // AT3G54660 // AT3G59820 // AT1G43560 // AT2G32920 // AT1G78490 // AT2G41680 // AT5G60640 // AT4G22220 // AT5G54290 // AT1G07960 // AT5G51720 // AT3G26060 // AT1G67740 // AT4G38920 // AT5G42980 // AT4G03520 // AT1G20340 // AT5G47840 // AT4G36910 // AT1G20110 // AT2G27600 // AT4G32060 // AT4G34720 // AT2G28520 // AT1G76080 // AT5G20500 // AT5G58070 // AT4G29670 // AT3G17…
GO:0070271	P	protein complex biogenesis	41	1709	294	28362	3.4e-06	0.00017	// AT5G58260 // AT1G49380 // AT5G35200 // AT1G53310 // AT5G54290 // AT4G35760 // AT1G70760 // AT5G42980 // AT1G79750 // AT5G51040 // AT3G04550 // AT3G60370 // AT4G10920 // AT1G54500 // AT3G18035 // AT4G38510 // AT5G42270 // AT1G48620 // AT2G44525 // AT2G20890 // AT4G20260 // AT4G09730 // AT1G76850 // AT5G49510 // AT4G04340 // AT4G02570 // AT5G56280 // AT1G53750 // AT1G03600 // AT4G35250 // AT2G01…
GO:0071822	P	protein complex subunit organization	45	1709	338	28362	3.5e-06	0.00017	// AT5G58260 // AT1G49380 // AT5G35200 // AT1G53310 // AT5G54290 // AT4G35760 // AT1G70760 // AT5G42980 // AT1G79750 // AT5G51040 // AT3G16640 // AT3G60370 // AT4G10920 // AT1G54500 // AT3G18035 // AT3G56190 // AT4G38510 // AT5G42270 // AT1G48620 // AT2G44525 // AT2G20890 // AT4G20260 // AT1G76850 // AT3G46010 // AT5G49510 // AT4G04340 // AT4G02570 // AT5G56280 // AT1G53750 // AT1G03600 // AT4G35…
GO:0044248	P	cellular catabolic process	101	1709	1024	28362	3.7e-06	0.00019	// AT1G14400 // AT3G60820 // AT5G48230 // AT2G41680 // AT5G35590 // AT3G63520 // AT4G04210 // AT2G20860 // AT4G29010 // AT3G08690 // AT2G02760 // AT2G47730 // AT3G45300 // AT2G41530 // AT5G49720 // AT2G02390 // AT1G79210 // AT1G06290 // AT1G26110 // AT5G06600 // AT1G75950 // AT1G02305 // AT5G12200 // AT5G38470 // AT5G60360 // AT5G22000 // AT1G78870 // AT1G55000 // AT1G09850 // AT4G33090 // AT3G10…
GO:0009409	P	response to cold	49	1709	384	28362	3.8e-06	0.00019	// AT4G31990 // AT3G53460 // AT3G12780 // AT5G65060 // AT4G38680 // AT5G52310 // AT4G04330 // AT5G42900 // AT5G23070 // AT2G37220 // AT1G27320 // AT2G17840 // AT3G26744 // AT4G34150 // AT1G31812 // AT1G03680 // AT2G47730 // AT4G35790 // AT5G12140 // AT5G58070 // AT3G11630 // AT4G11150 // AT4G20260 // AT5G65050 // AT2G35040 // AT4G21150 // AT3G09200 // AT5G53000 // AT5G67590 // AT2G17870 // AT1G32…
GO:0009056	P	catabolic process	131	1709	1430	28362	4.7e-06	0.00023	// AT1G14400 // AT3G60820 // AT3G08510 // AT3G12780 // AT5G48230 // AT2G41680 // AT5G35590 // AT3G63520 // AT5G56350 // AT4G04210 // AT2G20860 // AT1G34430 // AT4G29010 // AT3G15730 // AT3G08690 // AT2G02760 // AT2G47730 // AT3G25860 // AT3G45300 // AT5G42270 // AT2G41530 // AT5G49720 // AT2G02390 // AT5G50850 // AT1G70730 // AT1G79210 // AT1G06290 // AT1G26110 // AT5G06600 // AT1G75950 // AT4G33…
GO:0006779	P	porphyrin-containing compound biosynthetic process	17	1709	68	28362	5e-06	0.00024	// AT4G01690 // AT5G56860 // AT1G08520 // AT4G15560 // AT2G26540 // AT2G20570 // AT2G41680 // AT5G40850 // AT3G51820 // AT2G30390 // AT5G18660 // AT1G44446 // AT1G10670 // AT4G25080 // AT2G40400 // AT1G69740 // AT5G13630
GO:0044723	P	single-organism carbohydrate metabolic process	68	1709	613	28362	5e-06	0.00024	// AT5G47780 // AT3G12780 // AT4G12720 // AT5G56360 // AT2G41680 // AT4G24620 // AT5G49720 // AT1G30230 // AT1G54580 // AT3G06580 // AT5G19220 // AT1G70730 // AT5G57330 // AT5G56350 // AT1G79500 // AT1G12000 // AT3G58560 // AT1G71220 // AT5G66680 // AT1G12840 // AT3G13930 // AT4G32410 // AT3G07160 // AT2G39930 // AT2G45790 // AT3G04240 // AT1G23190 // AT5G65810 // AT1G06410 // AT5G62220 // AT2G36…
GO:0006165	P	nucleoside diphosphate phosphorylation	18	1709	76	28362	5e-06	0.00024	// AT4G24620 // AT5G42740 // AT1G79550 // AT3G52990 // AT2G21170 // AT3G13930 // AT4G11010 // AT5G50850 // AT3G52200 // AT2G21330 // AT1G56190 // AT4G29130 // AT1G79530 // AT3G12780 // AT1G34430 // AT3G25860 // AT5G56350 // AT1G12000
GO:0006119	P	oxidative phosphorylation	12	1709	33	28362	5.4e-06	0.00026	// AT5G08530 // AT5G40650 // AT1G15120 // AT3G06310 // AT4G02580 // AT5G66760 // AT3G02090 // AT1G22840 // AT4G34700 // AT3G27380 // AT5G18800 // AT5G51040
GO:0042773	P	ATP synthesis coupled electron transport	12	1709	33	28362	5.4e-06	0.00026	// AT5G08530 // AT5G40650 // AT1G15120 // AT3G06310 // AT4G02580 // AT5G66760 // AT3G02090 // AT1G22840 // AT4G34700 // AT3G27380 // AT5G18800 // AT5G51040
GO:0046939	P	nucleotide phosphorylation	18	1709	78	28362	6.9e-06	0.00033	// AT4G24620 // AT5G42740 // AT1G79550 // AT3G52990 // AT2G21170 // AT3G13930 // AT4G11010 // AT5G50850 // AT3G52200 // AT2G21330 // AT1G56190 // AT4G29130 // AT1G79530 // AT3G12780 // AT1G34430 // AT3G25860 // AT5G56350 // AT1G12000
GO:0006807	P	nitrogen compound metabolic process	455	1709	6241	28362	7e-06	0.00033	// AT4G15560 // AT2G39020 // AT1G09690 // AT3G55750 // AT1G31180 // AT2G31610 // AT5G57180 // AT2G31810 // AT3G10070 // AT1G08200 // AT2G46280 // AT2G32950 // AT3G53870 // AT4G29410 // AT3G25860 // AT3G45300 // AT4G34700 // AT4G11560 // AT1G16280 // AT4G16720 // AT2G02390 // AT2G32080 // AT1G53320 // AT1G69690 // AT3G23940 // AT1G66580 // AT4G33250 // AT4G33090 // AT1G66070 // AT5G46160 // AT1G33…
GO:0006979	P	response to oxidative stress	54	1709	453	28362	7.5e-06	0.00035	// AT2G47510 // AT5G60640 // AT3G54660 // AT1G43560 // AT4G12720 // AT2G05710 // AT2G41680 // AT4G00860 // AT1G49300 // AT3G23400 // AT3G55460 // AT5G52310 // AT4G02580 // AT5G51020 // AT3G44340 // AT1G53670 // AT4G25130 // AT4G08390 // AT4G03520 // AT1G08830 // AT5G42980 // AT1G20630 // AT3G25530 // AT5G43750 // AT5G55070 // AT1G76080 // AT5G58070 // AT4G32551 // AT2G14170 // AT1G63460 // AT2G40…
GO:0006757	P	ATP generation from ADP	17	1709	71	28362	8.1e-06	0.00038	// AT4G24620 // AT5G42740 // AT1G79550 // AT3G52990 // AT2G21170 // AT3G13930 // AT5G50850 // AT3G52200 // AT2G21330 // AT1G56190 // AT4G29130 // AT1G79530 // AT3G12780 // AT1G34430 // AT3G25860 // AT5G56350 // AT1G12000
GO:0006096	P	glycolytic process	17	1709	71	28362	8.1e-06	0.00038	// AT4G24620 // AT5G42740 // AT1G79550 // AT3G52990 // AT2G21170 // AT3G13930 // AT5G50850 // AT3G52200 // AT2G21330 // AT1G56190 // AT4G29130 // AT1G79530 // AT3G12780 // AT1G34430 // AT3G25860 // AT5G56350 // AT1G12000
GO:0030163	P	protein catabolic process	55	1709	467	28362	8.5e-06	0.00039	// AT1G07140 // AT1G14400 // AT3G60820 // AT5G56150 // AT5G23540 // AT5G35590 // AT1G06430 // AT2G05840 // AT3G20060 // AT2G01570 // AT3G27925 // AT5G41340 // AT5G47040 // AT4G04210 // AT2G02760 // AT4G13250 // AT4G15420 // AT1G56450 // AT3G02540 // AT3G08690 // AT5G41700 // AT4G32940 // AT3G11910 // AT5G42270 // AT2G47940 // AT3G22110 // AT1G65430 // AT1G16890 // AT1G50670 // AT5G62540 // AT5G53…
GO:1901576	P	organic substance biosynthetic process	433	1709	5913	28362	8.6e-06	0.00039	// AT4G15560 // AT5G48230 // AT4G14210 // AT1G76490 // AT3G55750 // AT1G31180 // AT2G31610 // AT2G34630 // AT5G57180 // AT2G31810 // AT3G10070 // AT1G08200 // AT2G46280 // AT2G32950 // AT3G53870 // AT4G29410 // AT1G09690 // AT4G11560 // AT3G06550 // AT4G16720 // AT2G32080 // AT1G53320 // AT1G69690 // AT3G23940 // AT1G66580 // AT4G33250 // AT3G57650 // AT1G66070 // AT1G33120 // AT5G46290 // AT1G56…
GO:0022904	P	respiratory electron transport chain	13	1709	42	28362	9.5e-06	0.00043	// AT5G08530 // AT5G40650 // AT1G15120 // AT3G06310 // AT5G52840 // AT4G02580 // AT5G66760 // AT3G02090 // AT1G22840 // AT4G34700 // AT3G27380 // AT5G18800 // AT5G51040
GO:0006461	P	protein complex assembly	39	1709	287	28362	9.9e-06	0.00045	// AT5G58260 // AT1G49380 // AT5G35200 // AT1G53310 // AT5G54290 // AT4G35760 // AT1G70760 // AT5G42980 // AT1G79750 // AT5G51040 // AT3G60370 // AT4G10920 // AT1G54500 // AT3G18035 // AT4G38510 // AT5G42270 // AT1G48620 // AT2G44525 // AT2G20890 // AT4G20260 // AT1G76850 // AT5G49510 // AT4G04340 // AT4G02570 // AT5G56280 // AT1G53750 // AT1G03600 // AT4G35250 // AT2G01470 // AT5G13120 // AT4G39…
GO:0009132	P	nucleoside diphosphate metabolic process	18	1709	81	28362	1.1e-05	0.00048	// AT4G24620 // AT5G42740 // AT1G79550 // AT3G52990 // AT2G21170 // AT3G13930 // AT4G11010 // AT5G50850 // AT3G52200 // AT2G21330 // AT1G56190 // AT4G29130 // AT1G79530 // AT3G12780 // AT1G34430 // AT3G25860 // AT5G56350 // AT1G12000
GO:0046031	P	ADP metabolic process	17	1709	73	28362	1.1e-05	0.00049	// AT4G24620 // AT5G42740 // AT1G79550 // AT3G52990 // AT2G21170 // AT3G13930 // AT5G50850 // AT3G52200 // AT2G21330 // AT1G56190 // AT4G29130 // AT1G79530 // AT3G12780 // AT1G34430 // AT3G25860 // AT5G56350 // AT1G12000
GO:0009179	P	purine ribonucleoside diphosphate metabolic process	17	1709	73	28362	1.1e-05	0.00049	// AT4G24620 // AT5G42740 // AT1G79550 // AT3G52990 // AT2G21170 // AT3G13930 // AT5G50850 // AT3G52200 // AT2G21330 // AT1G56190 // AT4G29130 // AT1G79530 // AT3G12780 // AT1G34430 // AT3G25860 // AT5G56350 // AT1G12000
GO:0009135	P	purine nucleoside diphosphate metabolic process	17	1709	73	28362	1.1e-05	0.00049	// AT4G24620 // AT5G42740 // AT1G79550 // AT3G52990 // AT2G21170 // AT3G13930 // AT5G50850 // AT3G52200 // AT2G21330 // AT1G56190 // AT4G29130 // AT1G79530 // AT3G12780 // AT1G34430 // AT3G25860 // AT5G56350 // AT1G12000
GO:0009185	P	ribonucleoside diphosphate metabolic process	17	1709	73	28362	1.1e-05	0.00049	// AT4G24620 // AT5G42740 // AT1G79550 // AT3G52990 // AT2G21170 // AT3G13930 // AT5G50850 // AT3G52200 // AT2G21330 // AT1G56190 // AT4G29130 // AT1G79530 // AT3G12780 // AT1G34430 // AT3G25860 // AT5G56350 // AT1G12000
GO:0048193	P	Golgi vesicle transport	21	1709	108	28362	1.2e-05	0.00054	// AT4G32760 // AT1G76850 // AT3G13870 // AT1G10290 // AT1G02130 // AT5G47200 // AT2G01470 // AT4G17530 // AT5G39510 // AT5G12370 // AT2G21600 // AT2G23310 // AT4G14160 // AT1G30630 // AT1G56330 // AT5G58030 // AT3G44340 // AT5G16830 // AT1G26670 // AT2G44610 // AT3G17440
GO:1902582	P	single-organism intracellular transport	27	1709	165	28362	1.3e-05	0.00056	// AT1G07140 // AT3G44100 // AT2G47450 // AT1G55900 // AT5G43970 // AT1G04750 // AT3G63130 // AT1G71480 // AT5G47040 // AT1G27970 // AT5G41685 // AT5G16620 // AT5G40930 // AT1G72370 // AT1G72750 // AT1G04940 // AT2G20890 // AT4G30600 // AT1G06950 // AT3G09740 // AT2G45660 // AT5G19820 // AT2G33120 // AT2G15290 // AT2G40730 // AT3G11780 // AT5G52440
GO:0045036	P	protein targeting to chloroplast	12	1709	37	28362	1.4e-05	0.00061	// AT2G15290 // AT5G57180 // AT5G16620 // AT2G47450 // AT1G06950 // AT2G24820 // AT5G49910 // AT1G04940 // AT4G35450 // AT5G52440 // AT2G20890 // AT4G02510
GO:0072596	P	establishment of protein localization to chloroplast	12	1709	37	28362	1.4e-05	0.00061	// AT2G15290 // AT5G57180 // AT5G16620 // AT2G47450 // AT1G06950 // AT2G24820 // AT5G49910 // AT1G04940 // AT4G35450 // AT5G52440 // AT2G20890 // AT4G02510
GO:0009165	P	nucleotide biosynthetic process	24	1709	137	28362	1.4e-05	0.00061	// AT4G32260 // AT1G09830 // AT4G32180 // AT4G26510 // AT3G52300 // AT2G01350 // AT4G22930 // AT1G55090 // AT4G00895 // AT3G27740 // AT4G11150 // AT2G35040 // AT3G18680 // AT3G57610 // AT4G11010 // AT3G54470 // AT1G21640 // AT2G33040 // AT5G13450 // AT3G54690 // AT4G39080 // AT3G55010 // AT2G28520 // AT5G10810
GO:0009617	P	response to bacterium	52	1709	441	28362	1.4e-05	0.00061	// AT4G12720 // AT4G32260 // AT4G02420 // AT5G53120 // AT2G34690 // AT3G23400 // AT5G24660 // AT1G79380 // AT1G04510 // AT3G14415 // AT4G32551 // AT1G52740 // AT1G08830 // AT1G27320 // AT1G80600 // AT2G33340 // AT4G01050 // AT5G14740 // AT3G17210 // AT2G47730 // AT3G14150 // AT5G48810 // AT4G35450 // AT3G11630 // AT5G52310 // AT4G11150 // AT4G20260 // AT3G53180 // AT5G18650 // AT3G52960 // AT3G27…
GO:0009098	P	leucine biosynthetic process	8	1709	14	28362	1.7e-05	0.00071	// AT3G58990 // AT1G80560 // AT2G43100 // AT1G18500 // AT1G74040 // AT2G43090 // AT5G65780 // AT1G31180
GO:0006633	P	fatty acid biosynthetic process	26	1709	158	28362	1.7e-05	0.00072	// AT2G22230 // AT4G13840 // AT1G54580 // AT1G08510 // AT1G67730 // AT1G79750 // AT2G29390 // AT2G20860 // AT2G34770 // AT4G25050 // AT5G13520 // AT2G44620 // AT1G52670 // AT4G30950 // AT1G07420 // AT4G04320 // AT3G02580 // AT1G54630 // AT1G10670 // AT4G01900 // AT5G43760 // AT1G19440 // AT5G16390 // AT1G09430 // AT5G46290 // AT2G30200
GO:0072598	P	protein localization to chloroplast	12	1709	38	28362	1.8e-05	0.00074	// AT2G15290 // AT5G57180 // AT5G16620 // AT2G47450 // AT1G06950 // AT2G24820 // AT5G49910 // AT1G04940 // AT4G35450 // AT5G52440 // AT2G20890 // AT4G02510
GO:1901293	P	nucleoside phosphate biosynthetic process	24	1709	139	28362	1.8e-05	0.00074	// AT4G32260 // AT1G09830 // AT4G32180 // AT4G26510 // AT3G52300 // AT2G01350 // AT4G22930 // AT1G55090 // AT4G00895 // AT3G27740 // AT4G11150 // AT2G35040 // AT3G18680 // AT3G57610 // AT4G11010 // AT3G54470 // AT1G21640 // AT2G33040 // AT5G13450 // AT3G54690 // AT4G39080 // AT3G55010 // AT2G28520 // AT5G10810
GO:1901137	P	carbohydrate derivative biosynthetic process	42	1709	329	28362	1.8e-05	0.00074	// AT4G15560 // AT4G12720 // AT4G32260 // AT4G31780 // AT4G32180 // AT4G26510 // AT1G54580 // AT3G52300 // AT4G22930 // AT4G25050 // AT1G79500 // AT2G45790 // AT5G66680 // AT4G00895 // AT3G27740 // AT2G39930 // AT1G71220 // AT1G08200 // AT3G04240 // AT2G36390 // AT1G09830 // AT3G57610 // AT4G21150 // AT1G61790 // AT1G34130 // AT4G11010 // AT3G56040 // AT3G54470 // AT1G32060 // AT4G11150 // AT2G44…
GO:0055085	P	transmembrane transport	70	1709	667	28362	1.9e-05	0.0008	// AT3G42050 // AT5G16620 // AT4G32260 // AT2G47450 // AT5G64290 // AT5G43970 // AT4G01100 // AT3G52300 // AT4G38920 // AT4G32530 // AT1G04690 // AT2G25610 // AT4G33530 // AT2G01110 // AT4G00895 // AT3G28710 // AT2G16510 // AT5G41685 // AT4G29900 // AT2G01420 // AT4G34720 // AT1G76670 // AT5G40930 // AT3G04090 // AT4G02620 // AT4G38510 // AT1G78900 // AT1G72750 // AT1G04940 // AT5G39040 // AT4G11…
GO:0015995	P	chlorophyll biosynthetic process	15	1709	61	28362	2.1e-05	0.00085	// AT4G01690 // AT5G56860 // AT1G08520 // AT4G15560 // AT2G26540 // AT2G20570 // AT2G41680 // AT3G51820 // AT5G18660 // AT1G44446 // AT1G10670 // AT4G25080 // AT2G40400 // AT1G69740 // AT5G13630
GO:0009790	P	embryo development	62	1709	571	28362	2.3e-05	0.00094	// AT5G10360 // AT1G32500 // AT1G49510 // AT1G35680 // AT5G48230 // AT1G10470 // AT4G31780 // AT1G55900 // AT5G53400 // AT2G39990 // AT1G21650 // AT3G55610 // AT1G67730 // AT2G34630 // AT1G79750 // AT4G32551 // AT5G42390 // AT1G63700 // AT1G34430 // AT2G18510 // AT3G13530 // AT1G24340 // AT5G06110 // AT2G28000 // AT5G23940 // AT5G62440 // AT4G07410 // AT4G11150 // AT5G58230 // AT4G01560 // AT5G16…
GO:1902580	P	single-organism cellular localization	27	1709	172	28362	2.5e-05	0.001	// AT1G07140 // AT3G44100 // AT2G47450 // AT1G55900 // AT5G43970 // AT1G04750 // AT3G63130 // AT1G71480 // AT5G47040 // AT1G27970 // AT5G41685 // AT5G16620 // AT5G40930 // AT1G72370 // AT1G72750 // AT1G04940 // AT2G20890 // AT4G30600 // AT1G06950 // AT3G09740 // AT2G45660 // AT5G19820 // AT2G33120 // AT2G15290 // AT2G40730 // AT3G11780 // AT5G52440
GO:0006551	P	leucine metabolic process	9	1709	22	28362	3.9e-05	0.0016	// AT3G58990 // AT1G80560 // AT2G43100 // AT1G18500 // AT1G74040 // AT2G43090 // AT5G65780 // AT3G45300 // AT1G31180
GO:0016108	P	tetraterpenoid metabolic process	12	1709	42	28362	4e-05	0.0016	// AT3G04870 // AT3G63520 // AT5G17230 // AT4G14210 // AT5G57030 // AT2G48120 // AT4G22260 // AT2G26670 // AT1G10670 // AT4G00370 // AT3G10230 // AT5G06130
GO:0016116	P	carotenoid metabolic process	12	1709	42	28362	4e-05	0.0016	// AT3G04870 // AT3G63520 // AT5G17230 // AT4G14210 // AT5G57030 // AT2G48120 // AT4G22260 // AT2G26670 // AT1G10670 // AT4G00370 // AT3G10230 // AT5G06130
GO:0044257	P	cellular protein catabolic process	50	1709	444	28362	6.1e-05	0.0024	// AT1G07140 // AT1G14400 // AT3G60820 // AT5G56150 // AT5G23540 // AT5G35590 // AT1G06430 // AT2G05840 // AT3G20060 // AT5G41340 // AT5G47040 // AT4G04210 // AT2G02760 // AT4G13250 // AT4G15420 // AT1G56450 // AT3G02540 // AT3G08690 // AT5G41700 // AT4G32940 // AT3G11910 // AT5G42270 // AT3G22110 // AT1G65430 // AT1G16890 // AT1G50670 // AT5G62540 // AT5G53300 // AT3G55530 // AT5G18650 // AT4G27…
GO:0044282	P	small molecule catabolic process	25	1709	162	28362	6.2e-05	0.0025	// AT4G29010 // AT3G51840 // AT1G71180 // AT1G08110 // AT3G10850 // AT2G01350 // AT2G20860 // AT2G33150 // AT5G48230 // AT3G02720 // AT3G06860 // AT1G23190 // AT5G36160 // AT3G45300 // AT2G41530 // AT3G48990 // AT5G55070 // AT2G02390 // AT4G39850 // AT1G70730 // AT1G06290 // AT2G21170 // AT1G17290 // AT4G29130 // AT5G53580
GO:0051452	P	intracellular pH reduction	6	1709	8	28362	6.7e-05	0.0026	// AT4G34720 // AT1G19910 // AT4G39080 // AT2G28520 // AT1G75630 // AT4G38920
GO:0007035	P	vacuolar acidification	6	1709	8	28362	6.7e-05	0.0026	// AT4G34720 // AT1G19910 // AT4G39080 // AT2G28520 // AT1G75630 // AT4G38920
GO:0043094	P	cellular metabolic compound salvage	18	1709	95	28362	6.8e-05	0.0026	// AT5G53850 // AT5G53580 // AT3G12290 // AT1G67350 // AT4G14710 // AT2G33220 // AT2G47690 // AT3G18410 // AT4G26510 // AT4G34700 // AT5G52840 // AT4G00585 // AT5G63510 // AT5G37850 // AT1G32060 // AT3G14415 // AT1G49140 // AT3G14150
GO:0006526	P	arginine biosynthetic process	7	1709	13	28362	7.6e-05	0.0029	// AT1G80600 // AT3G27740 // AT4G17830 // AT1G75330 // AT2G37500 // AT3G57560 // AT4G01900
GO:0006888	P	ER to Golgi vesicle-mediated transport	12	1709	46	28362	8.5e-05	0.0033	// AT3G13870 // AT1G02130 // AT5G47200 // AT2G01470 // AT4G17530 // AT5G39510 // AT4G14160 // AT1G56330 // AT5G58030 // AT3G44340 // AT1G26670 // AT3G17440
GO:0043623	P	cellular protein complex assembly	28	1709	197	28362	8.5e-05	0.0033	// AT5G58260 // AT1G49380 // AT5G35200 // AT5G54290 // AT1G70760 // AT5G51040 // AT3G60370 // AT1G54500 // AT4G38510 // AT5G42270 // AT2G44525 // AT2G20890 // AT4G20260 // AT1G76850 // AT5G49510 // AT4G02570 // AT5G56280 // AT4G35760 // AT1G03600 // AT4G35250 // AT5G13120 // AT4G39080 // AT1G20260 // AT2G28520 // AT1G16720 // AT4G29350 // AT3G10220 // AT5G35220
GO:0045851	P	pH reduction	6	1709	9	28362	0.00011	0.0041	// AT4G34720 // AT1G19910 // AT4G39080 // AT2G28520 // AT1G75630 // AT4G38920
GO:0006811	P	ion transport	65	1709	645	28362	0.00011	0.0042	// AT3G13772 // AT3G42050 // AT4G23710 // AT4G32260 // AT5G64290 // AT3G28710 // AT2G19680 // AT3G52300 // AT4G38920 // AT4G32530 // AT1G04690 // AT2G25610 // AT2G33040 // AT1G27320 // AT4G00895 // AT2G16510 // AT4G29900 // AT4G32060 // AT4G34720 // AT3G25410 // AT3G04090 // AT4G02620 // AT4G38510 // AT5G22830 // AT1G78900 // AT1G47240 // AT4G11150 // AT2G38270 // AT2G40300 // AT5G19760 // AT4G33…
GO:0017038	P	protein import	20	1709	120	28362	0.00013	0.005	// AT1G07140 // AT1G27970 // AT2G15290 // AT1G71480 // AT5G16620 // AT2G47450 // AT1G55900 // AT1G06950 // AT5G43970 // AT5G47040 // AT5G40930 // AT3G63130 // AT1G21650 // AT1G04940 // AT1G72750 // AT2G45660 // AT5G41685 // AT5G19820 // AT2G20890 // AT5G52440
GO:0009260	P	ribonucleotide biosynthetic process	18	1709	101	28362	0.00013	0.005	// AT4G26510 // AT2G33040 // AT4G00895 // AT4G32260 // AT1G09830 // AT3G57610 // AT4G11010 // AT4G32180 // AT4G39080 // AT4G11150 // AT3G54470 // AT5G13450 // AT2G28520 // AT3G52300 // AT4G22930 // AT3G55010 // AT3G27740 // AT3G54690
GO:0046390	P	ribose phosphate biosynthetic process	18	1709	101	28362	0.00013	0.005	// AT4G26510 // AT2G33040 // AT4G00895 // AT4G32260 // AT1G09830 // AT3G57610 // AT4G11010 // AT4G32180 // AT4G39080 // AT4G11150 // AT3G54470 // AT5G13450 // AT2G28520 // AT3G52300 // AT4G22930 // AT3G55010 // AT3G27740 // AT3G54690
GO:0016109	P	tetraterpenoid biosynthetic process	10	1709	34	28362	0.00014	0.0053	// AT3G04870 // AT5G17230 // AT4G14210 // AT5G57030 // AT2G48120 // AT4G22260 // AT2G26670 // AT1G10670 // AT3G10230 // AT5G06130
GO:0016117	P	carotenoid biosynthetic process	10	1709	34	28362	0.00014	0.0053	// AT3G04870 // AT5G17230 // AT4G14210 // AT5G57030 // AT2G48120 // AT4G22260 // AT2G26670 // AT1G10670 // AT3G10230 // AT5G06130
GO:0006720	P	isoprenoid metabolic process	25	1709	172	28362	0.00015	0.0054	// AT4G15560 // AT5G48230 // AT4G14210 // AT1G76490 // AT2G48120 // AT2G26670 // AT3G63520 // AT2G34630 // AT4G33360 // AT5G62790 // AT4G34640 // AT2G38700 // AT3G10230 // AT5G06130 // AT3G04870 // AT4G13830 // AT4G32980 // AT5G17230 // AT5G58560 // AT5G57030 // AT1G10670 // AT2G02500 // AT4G22260 // AT4G00370 // AT1G74340
GO:0007005	P	mitochondrion organization	21	1709	131	28362	0.00015	0.0054	// AT3G57090 // AT1G10290 // AT1G59610 // AT5G64050 // AT1G72750 // AT1G55900 // AT5G43970 // AT2G29530 // AT5G40930 // AT5G27540 // AT5G50810 // AT2G28000 // AT1G14830 // AT5G24650 // AT5G40770 // AT5G41685 // AT5G42080 // AT3G08580 // AT2G44525 // AT5G51040 // AT1G50200
GO:0005982	P	starch metabolic process	14	1709	66	28362	0.00015	0.0056	// AT3G58560 // AT5G26570 // AT5G19220 // AT4G12720 // AT1G69830 // AT2G41680 // AT2G40840 // AT4G09020 // AT2G39930 // AT1G23190 // AT1G10670 // AT1G70730 // AT2G36390 // AT4G24620
GO:0016051	P	carbohydrate biosynthetic process	40	1709	342	28362	0.00016	0.0057	// AT5G47780 // AT3G12780 // AT4G12720 // AT1G06410 // AT2G41680 // AT5G49720 // AT1G30230 // AT1G54580 // AT5G19220 // AT4G24620 // AT1G79500 // AT3G58560 // AT1G71220 // AT1G12840 // AT4G32410 // AT3G07160 // AT2G39930 // AT2G45790 // AT1G23190 // AT5G65810 // AT5G62220 // AT2G36390 // AT3G06550 // AT5G06700 // AT5G15650 // AT3G57220 // AT1G10670 // AT1G70730 // AT1G32060 // AT2G44620 // AT5G42…
GO:0016050	P	vesicle organization	15	1709	75	28362	0.00016	0.0057	// AT2G06530 // AT1G20110 // AT2G01470 // AT4G32150 // AT5G39510 // AT1G04750 // AT1G11890 // AT5G58060 // AT2G33120 // AT3G09740 // AT1G65260 // AT5G16830 // AT1G26670 // AT5G11150 // AT3G17440
GO:0018193	P	peptidyl-amino acid modification	35	1709	284	28362	0.00016	0.0058	// AT3G52960 // AT1G03930 // AT1G72710 // AT3G12780 // AT1G17440 // AT1G32060 // AT5G01820 // AT3G62030 // AT5G66240 // AT4G26840 // AT3G10070 // AT5G35100 // AT4G20260 // AT3G25760 // AT1G74070 // AT1G34130 // AT5G66680 // AT4G27960 // AT1G53240 // AT4G20130 // AT4G28880 // AT2G47210 // AT1G61790 // AT1G54140 // AT3G06930 // AT5G13120 // AT1G05830 // AT1G09340 // AT5G49020 // AT3G57870 // AT1G60…
GO:0072330	P	monocarboxylic acid biosynthetic process	32	1709	251	28362	0.00017	0.0062	// AT4G29010 // AT2G22230 // AT4G13840 // AT1G54580 // AT1G08510 // AT1G67730 // AT1G79750 // AT2G29390 // AT2G20860 // AT2G34770 // AT2G33150 // AT3G02720 // AT4G25050 // AT3G25770 // AT5G13520 // AT2G44620 // AT1G52670 // AT4G30950 // AT1G07420 // AT4G04320 // AT3G02580 // AT1G54630 // AT1G10670 // AT1G20510 // AT4G01900 // AT5G43760 // AT1G19440 // AT5G16390 // AT1G09430 // AT5G46290 // AT3G25…
GO:0061025	P	membrane fusion	14	1709	67	28362	0.00018	0.0062	// AT4G20410 // AT5G11150 // AT4G32150 // AT5G39510 // AT3G56190 // AT1G04750 // AT1G11890 // AT5G58060 // AT2G33120 // AT3G09740 // AT5G16830 // AT1G26670 // AT4G04210 // AT3G17440
GO:0009108	P	coenzyme biosynthetic process	21	1709	134	28362	0.00019	0.0069	// AT1G55090 // AT2G03690 // AT3G63410 // AT5G36880 // AT2G44750 // AT3G12290 // AT4G32180 // AT5G50850 // AT5G53580 // AT2G31955 // AT4G39850 // AT1G21640 // AT5G09820 // AT1G09430 // AT1G10670 // AT2G01350 // AT5G37850 // AT1G23360 // AT2G34630 // AT3G25860 // AT2G20860
GO:0010207	P	photosystem II assembly	8	1709	22	28362	0.0002	0.0072	// AT4G35250 // AT3G60370 // AT1G54500 // AT1G16720 // AT4G35760 // AT5G35220 // AT2G20890 // AT1G03600
GO:0017014	P	protein nitrosylation	7	1709	16	28362	0.00021	0.0072	// AT3G12780 // AT3G52960 // AT1G32060 // AT1G09340 // AT1G53240 // AT3G25760 // AT5G35100
GO:0018119	P	peptidyl-cysteine S-nitrosylation	7	1709	16	28362	0.00021	0.0072	// AT3G12780 // AT3G52960 // AT1G32060 // AT1G09340 // AT1G53240 // AT3G25760 // AT5G35100
GO:0009163	P	nucleoside biosynthetic process	17	1709	96	28362	0.00022	0.0076	// AT2G33040 // AT4G00895 // AT4G32260 // AT3G27740 // AT3G57610 // AT4G11010 // AT4G32180 // AT1G32060 // AT4G39080 // AT3G54470 // AT5G13450 // AT2G28520 // AT3G52300 // AT4G22930 // AT4G26510 // AT3G54690 // AT4G11150
GO:0009765	P	photosynthesis, light harvesting	11	1709	44	28362	0.00023	0.0079	// AT1G54780 // AT1G75690 // AT2G47940 // AT5G57030 // AT4G18370 // AT1G06430 // AT5G42270 // AT1G45474 // AT3G27925 // AT5G01500 // AT1G03600
GO:0007264	P	small GTPase mediated signal transduction	19	1709	116	28362	0.00023	0.008	// AT1G20090 // AT3G59920 // AT2G44100 // AT1G02130 // AT5G47200 // AT4G19640 // AT4G35860 // AT4G17530 // AT5G27540 // AT3G62290 // AT1G49300 // AT3G09900 // AT2G44610 // AT5G67560 // AT1G70490 // AT5G03520 // AT3G49870 // AT2G47170 // AT1G10630
GO:0051603	P	proteolysis involved in cellular protein catabolic process	47	1709	435	28362	0.00024	0.0081	// AT1G07140 // AT1G14400 // AT3G60820 // AT5G56150 // AT5G23540 // AT5G35590 // AT2G05840 // AT3G20060 // AT5G41340 // AT5G47040 // AT4G04210 // AT2G02760 // AT4G15420 // AT1G56450 // AT3G02540 // AT3G08690 // AT5G41700 // AT4G32940 // AT3G11910 // AT3G22110 // AT1G65430 // AT1G16890 // AT1G50670 // AT5G62540 // AT5G53300 // AT3G55530 // AT5G18650 // AT4G27960 // AT4G02570 // AT5G05780 // AT5G56…
GO:0034599	P	cellular response to oxidative stress	17	1709	97	28362	0.00024	0.0083	// AT1G08830 // AT4G25130 // AT1G07890 // AT1G43560 // AT1G03680 // AT5G18100 // AT2G41680 // AT1G50320 // AT1G66330 // AT1G76080 // AT5G16400 // AT4G09010 // AT5G57345 // AT5G42980 // AT4G03520 // AT4G08390 // AT4G25100
GO:0022618	P	ribonucleoprotein complex assembly	18	1709	107	28362	0.00025	0.0086	// AT4G01560 // AT1G32990 // AT3G14010 // AT1G26110 // AT2G36620 // AT1G14320 // AT4G11420 // AT2G36000 // AT1G66070 // AT1G66580 // AT1G72370 // AT2G23930 // AT5G61770 // AT1G54170 // AT1G04510 // AT2G33340 // AT3G11500 // AT5G25757
GO:0006511	P	ubiquitin-dependent protein catabolic process	42	1709	376	28362	0.00026	0.009	// AT1G07140 // AT1G14400 // AT3G60820 // AT5G56150 // AT5G23540 // AT5G35590 // AT2G05840 // AT3G20060 // AT5G41340 // AT4G04210 // AT2G02760 // AT4G15420 // AT1G56450 // AT3G02540 // AT3G08690 // AT5G41700 // AT3G11910 // AT3G22110 // AT1G65430 // AT1G16890 // AT1G50670 // AT5G62540 // AT5G53300 // AT3G55530 // AT5G18650 // AT4G27960 // AT4G02570 // AT5G05780 // AT5G56280 // AT3G62980 // AT1G53…
GO:0009081	P	branched-chain amino acid metabolic process	7	1709	17	28362	0.00028	0.0094	// AT2G31810 // AT3G48560 // AT3G23940 // AT3G58610 // AT3G20390 // AT5G65780 // AT3G45300
GO:0019941	P	modification-dependent protein catabolic process	42	1709	378	28362	0.00029	0.0098	// AT1G07140 // AT1G14400 // AT3G60820 // AT5G56150 // AT5G23540 // AT5G35590 // AT2G05840 // AT3G20060 // AT5G41340 // AT4G04210 // AT2G02760 // AT4G15420 // AT1G56450 // AT3G02540 // AT3G08690 // AT5G41700 // AT3G11910 // AT3G22110 // AT1G65430 // AT1G16890 // AT1G50670 // AT5G62540 // AT5G53300 // AT3G55530 // AT5G18650 // AT4G27960 // AT4G02570 // AT5G05780 // AT5G56280 // AT3G62980 // AT1G53…
GO:0009156	P	ribonucleoside monophosphate biosynthetic process	15	1709	80	28362	0.00029	0.0098	// AT2G33040 // AT4G00895 // AT4G32260 // AT1G09830 // AT3G57610 // AT4G39080 // AT3G55010 // AT3G54470 // AT5G13450 // AT2G28520 // AT3G52300 // AT4G22930 // AT4G26510 // AT3G27740 // AT4G11150
GO:0009064	P	glutamine family amino acid metabolic process	14	1709	71	28362	0.0003	0.0098	// AT1G80600 // AT3G53180 // AT1G78680 // AT3G27740 // AT5G64290 // AT3G55610 // AT1G63660 // AT4G17830 // AT5G12860 // AT1G75330 // AT2G37500 // AT3G57560 // AT5G65010 // AT4G01900
GO:0005198	F	structural molecule activity	107	1709	538	28362	1.1e-23	1.4e-20	// AT1G09690 // AT3G55750 // AT4G00810 // AT2G27530 // AT2G31610 // AT5G02610 // AT2G04390 // AT2G05220 // AT3G53870 // AT4G29410 // AT3G44010 // AT3G20970 // AT4G16720 // AT1G51390 // AT4G29390 // AT1G20696 // AT1G66580 // AT1G02780 // AT1G26880 // AT5G38560 // AT4G22220 // AT1G33120 // AT5G55140 // AT5G47180 // AT1G07070 // AT2G43150 // AT1G77940 // AT5G02450 // AT5G48760 // AT1G18080 // AT3G04…
GO:0003824	F	catalytic activity	752	1709	9101	28362	1.3e-23	1.4e-20	// AT2G32920 // AT4G15560 // AT2G39020 // AT2G11890 // AT5G48230 // AT4G14210 // AT1G76490 // AT1G31180 // AT4G32530 // AT2G34630 // AT3G59350 // AT3G14415 // AT1G24340 // AT3G10070 // AT1G16460 // AT1G08200 // AT2G32950 // AT4G10000 // AT3G20810 // AT3G25860 // AT3G45300 // AT3G27110 // AT1G16280 // AT3G06550 // AT4G27820 // AT3G15640 // AT4G19830 // AT2G02390 // AT1G19910 // AT3G10350 // AT1G53…
GO:0044822	F	poly(A) RNA binding	75	1709	337	28362	2.5e-19	1.3e-16	// AT5G10360 // AT4G26650 // AT3G53460 // AT2G31610 // AT2G43970 // AT1G54080 // AT3G10360 // AT5G07290 // AT3G04840 // AT4G16830 // AT4G38680 // AT3G21215 // AT4G16390 // AT2G23930 // AT3G55770 // AT1G10590 // AT2G18510 // AT2G37220 // AT1G47490 // AT1G02150 // AT1G26110 // AT1G14320 // AT5G61960 // AT3G13460 // AT3G55340 // AT5G50250 // AT1G72370 // AT5G51120 // AT1G76010 // AT3G53870 // AT3G57…
GO:0003729	F	mRNA binding	75	1709	337	28362	2.5e-19	1.3e-16	// AT5G10360 // AT4G26650 // AT3G53460 // AT2G31610 // AT2G43970 // AT1G54080 // AT3G10360 // AT5G07290 // AT3G04840 // AT4G16830 // AT4G38680 // AT3G21215 // AT4G16390 // AT2G23930 // AT3G55770 // AT1G10590 // AT2G18510 // AT2G37220 // AT1G47490 // AT1G02150 // AT1G26110 // AT1G14320 // AT5G61960 // AT3G13460 // AT3G55340 // AT5G50250 // AT1G72370 // AT5G51120 // AT1G76010 // AT3G53870 // AT3G57…
GO:0003735	F	structural constituent of ribosome	80	1709	391	28362	1.2e-18	5.1e-16	// AT5G10360 // AT5G46160 // AT2G33800 // AT5G48760 // AT1G35680 // AT3G16080 // AT1G09690 // AT5G22440 // AT3G04840 // AT5G03850 // AT5G35530 // AT4G17560 // AT2G27530 // AT3G06320 // AT2G31610 // AT3G49080 // AT1G15930 // AT1G74970 // AT5G02610 // AT1G07070 // AT1G32990 // AT1G14320 // AT3G53740 // AT2G36620 // AT2G04390 // AT3G55170 // AT5G06360 // AT1G66580 // AT2G38140 // AT1G72370 // AT1G25…
GO:0005515	F	protein binding	348	1709	3669	28362	8.5e-17	2.9e-14	// AT3G21865 // AT1G76490 // AT4G15560 // AT3G59350 // AT3G10070 // AT2G46280 // AT2G32950 // AT1G04940 // AT1G16280 // AT5G65260 // AT5G07020 // AT3G22190 // AT1G69690 // AT5G11490 // AT5G13180 // AT2G15290 // AT2G40730 // AT3G10670 // AT5G11150 // AT5G52440 // AT1G50430 // AT1G10290 // AT1G59610 // AT1G18080 // AT5G02770 // AT3G46010 // AT4G35800 // AT4G19170 // AT5G61960 // AT1G60070 // AT5G41…
GO:0005488	F	binding	883	1709	12081	28362	1.5e-13	4.5e-11	// AT4G26650 // AT3G21865 // AT2G11890 // AT5G48230 // AT1G76490 // AT1G31180 // AT2G31610 // AT4G15560 // AT2G34630 // AT3G59350 // AT3G14415 // AT3G12780 // AT1G24340 // AT2G31810 // AT3G10070 // AT1G57870 // AT1G08200 // AT2G46280 // AT2G32950 // AT1G76010 // AT3G53870 // AT1G04940 // AT3G20810 // AT3G45300 // AT5G42270 // AT4G11560 // AT1G16280 // AT5G65260 // AT4G19830 // AT5G07020 // AT2G21…
GO:0016491	F	oxidoreductase activity	169	1709	1547	28362	1.3e-12	3.3e-10	// AT3G54660 // AT4G29010 // AT4G14210 // AT1G76490 // AT3G59920 // AT1G03400 // AT1G31180 // AT3G63520 // AT3G14415 // AT1G08830 // AT5G52100 // AT1G24340 // AT5G62790 // AT3G12800 // AT4G35260 // AT4G22010 // AT1G06650 // AT2G47730 // AT3G14150 // AT3G20810 // AT5G06060 // AT2G41680 // AT3G45300 // AT5G67590 // AT3G06550 // AT5G43940 // AT2G02390 // AT3G06310 // AT5G50850 // AT5G40370 // AT4G30…
GO:0036094	F	small molecule binding	310	1709	3434	28362	2.1e-12	4.8e-10	// AT4G26650 // AT1G14400 // AT3G54660 // AT2G35050 // AT3G13490 // AT2G11890 // AT3G17410 // AT5G49910 // AT4G02420 // AT4G35860 // AT3G01200 // AT5G38560 // AT4G16390 // AT4G30210 // AT1G31180 // AT5G19220 // AT1G54080 // AT2G31955 // AT5G23070 // AT3G59350 // AT3G14415 // AT5G05200 // AT1G55090 // AT1G08520 // AT1G63700 // AT3G12780 // AT3G25530 // AT5G62790 // AT3G55340 // AT5G50250 // AT1G57…
GO:1901265	F	nucleoside phosphate binding	302	1709	3370	28362	9.6e-12	1.8e-09	// AT4G26650 // AT1G14400 // AT3G54660 // AT2G35050 // AT3G13490 // AT2G11890 // AT3G17410 // AT5G49910 // AT4G02420 // AT4G35860 // AT3G01200 // AT2G37250 // AT4G16390 // AT4G30210 // AT1G31180 // AT5G19220 // AT1G54080 // AT2G31955 // AT5G23070 // AT3G59350 // AT3G14415 // AT5G05200 // AT1G55090 // AT1G08520 // AT1G63700 // AT3G12780 // AT3G25530 // AT5G62790 // AT3G55340 // AT5G50250 // AT1G57…
GO:0000166	F	nucleotide binding	302	1709	3370	28362	9.6e-12	1.8e-09	// AT4G26650 // AT1G14400 // AT3G54660 // AT2G35050 // AT3G13490 // AT2G11890 // AT3G17410 // AT5G49910 // AT4G02420 // AT4G35860 // AT3G01200 // AT2G37250 // AT4G16390 // AT4G30210 // AT1G31180 // AT5G19220 // AT1G54080 // AT2G31955 // AT5G23070 // AT3G59350 // AT3G14415 // AT5G05200 // AT1G55090 // AT1G08520 // AT1G63700 // AT3G12780 // AT3G25530 // AT5G62790 // AT3G55340 // AT5G50250 // AT1G57…
GO:0016853	F	isomerase activity	49	1709	264	28362	1.2e-10	2.1e-08	// AT1G20810 // AT5G64350 // AT3G53580 // AT2G32920 // AT1G75690 // AT5G04130 // AT1G07960 // AT3G63400 // AT5G57330 // AT4G24620 // AT2G18040 // AT1G26550 // AT5G49970 // AT5G62790 // AT3G60370 // AT4G29010 // AT3G06860 // AT2G45790 // AT2G43560 // AT3G16110 // AT5G17530 // AT1G23190 // AT2G02390 // AT3G62030 // AT3G10230 // AT5G35100 // AT3G25770 // AT5G60640 // AT4G19830 // AT4G39710 // AT1G74…
GO:0035639	F	purine ribonucleoside triphosphate binding	230	1709	2515	28362	9.1e-10	1.5e-07	// AT1G14400 // AT3G54660 // AT2G35050 // AT3G13490 // AT2G11890 // AT1G06700 // AT5G49910 // AT4G02420 // AT4G35860 // AT3G01200 // AT2G37250 // AT4G39960 // AT3G13870 // AT3G55610 // AT5G19220 // AT2G31955 // AT5G23070 // AT3G59350 // AT5G05200 // AT1G55090 // AT1G08520 // AT1G63700 // AT3G12780 // AT3G08690 // AT2G02760 // AT1G57870 // AT5G63400 // AT1G07110 // AT3G45300 // AT4G30600 // AT1G16…
GO:0097367	F	carbohydrate derivative binding	242	1709	2696	28362	1.5e-09	2.2e-07	// AT1G14400 // AT3G54660 // AT2G35050 // AT3G13490 // AT2G11890 // AT1G06700 // AT5G49910 // AT4G02420 // AT4G35860 // AT3G01200 // AT2G37250 // AT4G39960 // AT3G13870 // AT3G55610 // AT5G19220 // AT2G31955 // AT5G23070 // AT3G59350 // AT3G14415 // AT5G05200 // AT1G55090 // AT1G08520 // AT1G63700 // AT3G12780 // AT2G33470 // AT3G08690 // AT2G02760 // AT1G57870 // AT5G63400 // AT3G14150 // AT1G07…
GO:0032553	F	ribonucleotide binding	239	1709	2664	28362	2e-09	2.8e-07	// AT1G14400 // AT3G54660 // AT2G35050 // AT3G13490 // AT2G11890 // AT1G06700 // AT5G49910 // AT4G02420 // AT4G35860 // AT3G01200 // AT2G37250 // AT4G39960 // AT3G13870 // AT3G55610 // AT5G19220 // AT2G31955 // AT5G23070 // AT3G59350 // AT3G14415 // AT5G05200 // AT1G55090 // AT1G08520 // AT1G63700 // AT3G12780 // AT3G08690 // AT2G02760 // AT1G57870 // AT5G63400 // AT3G14150 // AT1G07110 // AT3G45…
GO:0044769	F	ATPase activity, coupled to transmembrane movement of ions, rotational mechanism	18	1709	44	28362	5.9e-09	7.4e-07	// AT3G28715 // AT4G00895 // AT3G28710 // AT4G02620 // AT2G33040 // AT5G47030 // AT4G34720 // AT1G19910 // AT4G39080 // AT3G52300 // AT4G11150 // AT2G28520 // AT5G13450 // AT4G38510 // AT1G78900 // AT1G75630 // AT4G38920 // AT1G12840
GO:0004175	F	endopeptidase activity	41	1709	225	28362	6e-09	7.4e-07	// AT3G60820 // AT2G05920 // AT5G35590 // AT1G06430 // AT2G05840 // AT3G02090 // AT3G27925 // AT5G47040 // AT3G52640 // AT5G42390 // AT2G25870 // AT2G43070 // AT1G56450 // AT3G14240 // AT4G32940 // AT2G31440 // AT5G42270 // AT3G14067 // AT2G47940 // AT3G22110 // AT5G38510 // AT2G32480 // AT4G20850 // AT3G27110 // AT3G19170 // AT4G18370 // AT3G18490 // AT5G45390 // AT3G07950 // AT5G42620 // AT4G14…
GO:0046961	F	proton-transporting ATPase activity, rotational mechanism	12	1709	16	28362	1.4e-08	1.6e-06	// AT3G28715 // AT1G12840 // AT3G28710 // AT4G34720 // AT1G19910 // AT4G39080 // AT2G28520 // AT4G02620 // AT1G78900 // AT1G75630 // AT4G38920 // AT4G11150
GO:0005525	F	GTP binding	46	1709	282	28362	1.5e-08	1.7e-06	// AT3G13870 // AT1G10290 // AT5G47200 // AT4G35860 // AT3G52750 // AT4G26510 // AT1G49300 // AT2G31060 // AT2G36250 // AT4G02790 // AT5G64300 // AT5G03520 // AT3G49870 // AT1G10630 // AT3G57610 // AT2G41670 // AT1G02130 // AT1G59610 // AT4G02080 // AT1G70490 // AT3G62560 // AT4G30600 // AT3G63420 // AT4G02510 // AT1G52980 // AT4G02260 // AT4G17530 // AT5G27540 // AT1G07930 // AT1G56050 // AT5G67…
GO:0032550	F	purine ribonucleoside binding	230	1709	2612	28362	1.8e-08	1.8e-06	// AT1G14400 // AT3G54660 // AT2G35050 // AT3G13490 // AT2G11890 // AT1G06700 // AT5G49910 // AT4G02420 // AT4G35860 // AT3G01200 // AT2G37250 // AT4G39960 // AT3G13870 // AT3G55610 // AT5G19220 // AT2G31955 // AT5G23070 // AT3G59350 // AT5G05200 // AT1G55090 // AT1G08520 // AT1G63700 // AT3G12780 // AT3G08690 // AT2G02760 // AT1G57870 // AT5G63400 // AT1G07110 // AT3G45300 // AT4G30600 // AT1G16…
GO:0001883	F	purine nucleoside binding	230	1709	2612	28362	1.8e-08	1.8e-06	// AT1G14400 // AT3G54660 // AT2G35050 // AT3G13490 // AT2G11890 // AT1G06700 // AT5G49910 // AT4G02420 // AT4G35860 // AT3G01200 // AT2G37250 // AT4G39960 // AT3G13870 // AT3G55610 // AT5G19220 // AT2G31955 // AT5G23070 // AT3G59350 // AT5G05200 // AT1G55090 // AT1G08520 // AT1G63700 // AT3G12780 // AT3G08690 // AT2G02760 // AT1G57870 // AT5G63400 // AT1G07110 // AT3G45300 // AT4G30600 // AT1G16…
GO:0032549	F	ribonucleoside binding	230	1709	2617	28362	2.1e-08	2e-06	// AT1G14400 // AT3G54660 // AT2G35050 // AT3G13490 // AT2G11890 // AT1G06700 // AT5G49910 // AT4G02420 // AT4G35860 // AT3G01200 // AT2G37250 // AT4G39960 // AT3G13870 // AT3G55610 // AT5G19220 // AT2G31955 // AT5G23070 // AT3G59350 // AT5G05200 // AT1G55090 // AT1G08520 // AT1G63700 // AT3G12780 // AT3G08690 // AT2G02760 // AT1G57870 // AT5G63400 // AT1G07110 // AT3G45300 // AT4G30600 // AT1G16…
GO:0001882	F	nucleoside binding	230	1709	2618	28362	2.2e-08	2e-06	// AT1G14400 // AT3G54660 // AT2G35050 // AT3G13490 // AT2G11890 // AT1G06700 // AT5G49910 // AT4G02420 // AT4G35860 // AT3G01200 // AT2G37250 // AT4G39960 // AT3G13870 // AT3G55610 // AT5G19220 // AT2G31955 // AT5G23070 // AT3G59350 // AT5G05200 // AT1G55090 // AT1G08520 // AT1G63700 // AT3G12780 // AT3G08690 // AT2G02760 // AT1G57870 // AT5G63400 // AT1G07110 // AT3G45300 // AT4G30600 // AT1G16…
GO:0032555	F	purine ribonucleotide binding	230	1709	2631	28362	3.2e-08	2.7e-06	// AT1G14400 // AT3G54660 // AT2G35050 // AT3G13490 // AT2G11890 // AT1G06700 // AT5G49910 // AT4G02420 // AT4G35860 // AT3G01200 // AT2G37250 // AT4G39960 // AT3G13870 // AT3G55610 // AT5G19220 // AT2G31955 // AT5G23070 // AT3G59350 // AT5G05200 // AT1G55090 // AT1G08520 // AT1G63700 // AT3G12780 // AT3G08690 // AT2G02760 // AT1G57870 // AT5G63400 // AT1G07110 // AT3G45300 // AT4G30600 // AT1G16…
GO:0017076	F	purine nucleotide binding	230	1709	2633	28362	3.3e-08	2.8e-06	// AT1G14400 // AT3G54660 // AT2G35050 // AT3G13490 // AT2G11890 // AT1G06700 // AT5G49910 // AT4G02420 // AT4G35860 // AT3G01200 // AT2G37250 // AT4G39960 // AT3G13870 // AT3G55610 // AT5G19220 // AT2G31955 // AT5G23070 // AT3G59350 // AT5G05200 // AT1G55090 // AT1G08520 // AT1G63700 // AT3G12780 // AT3G08690 // AT2G02760 // AT1G57870 // AT5G63400 // AT1G07110 // AT3G45300 // AT4G30600 // AT1G16…
GO:0016651	F	oxidoreductase activity, acting on NAD(P)H	28	1709	127	28362	5e-08	4e-06	// AT5G58260 // AT3G54660 // AT1G43560 // AT2G41680 // AT5G58330 // AT1G70760 // AT5G42980 // AT1G79750 // AT4G03520 // AT5G08530 // AT5G20080 // AT1G76080 // AT5G52840 // AT5G67590 // AT3G17240 // AT4G00570 // AT5G43940 // AT1G03680 // AT3G06310 // AT4G35760 // AT5G18800 // AT4G30210 // AT3G27890 // AT1G50320 // AT4G02580 // AT5G16400 // AT5G47890 // AT1G79010
GO:0016859	F	cis-trans isomerase activity	19	1709	61	28362	8.2e-08	6.1e-06	// AT1G20810 // AT5G64350 // AT3G63400 // AT4G19830 // AT3G15520 // AT4G39710 // AT1G74070 // AT5G13120 // AT3G60370 // AT3G10060 // AT2G43560 // AT5G13410 // AT3G25220 // AT1G26550 // AT2G02390 // AT2G18040 // AT5G35100 // AT4G26555 // AT3G62030
GO:0019001	F	guanyl nucleotide binding	46	1709	301	28362	8.6e-08	6.1e-06	// AT3G13870 // AT1G10290 // AT5G47200 // AT4G35860 // AT3G52750 // AT4G26510 // AT1G49300 // AT2G31060 // AT2G36250 // AT4G02790 // AT5G64300 // AT5G03520 // AT3G49870 // AT1G10630 // AT3G57610 // AT2G41670 // AT1G02130 // AT1G59610 // AT4G02080 // AT1G70490 // AT3G62560 // AT4G30600 // AT3G63420 // AT4G02510 // AT1G52980 // AT4G02260 // AT4G17530 // AT5G27540 // AT1G07930 // AT1G56050 // AT5G67…
GO:0032561	F	guanyl ribonucleotide binding	46	1709	301	28362	8.6e-08	6.1e-06	// AT3G13870 // AT1G10290 // AT5G47200 // AT4G35860 // AT3G52750 // AT4G26510 // AT1G49300 // AT2G31060 // AT2G36250 // AT4G02790 // AT5G64300 // AT5G03520 // AT3G49870 // AT1G10630 // AT3G57610 // AT2G41670 // AT1G02130 // AT1G59610 // AT4G02080 // AT1G70490 // AT3G62560 // AT4G30600 // AT3G63420 // AT4G02510 // AT1G52980 // AT4G02260 // AT4G17530 // AT5G27540 // AT1G07930 // AT1G56050 // AT5G67…
GO:0015405	F	P-P-bond-hydrolysis-driven transmembrane transporter activity	41	1709	251	28362	8.8e-08	6.1e-06	// AT5G03910 // AT1G72750 // AT4G26670 // AT5G50810 // AT5G43970 // AT1G21650 // AT3G52300 // AT4G38920 // AT2G01110 // AT4G00895 // AT4G14870 // AT4G29900 // AT2G18710 // AT4G34720 // AT5G40930 // AT4G02620 // AT4G38510 // AT1G78900 // AT5G39040 // AT4G11150 // AT4G33520 // AT2G33040 // AT5G47030 // AT1G19910 // AT5G57110 // AT4G39850 // AT1G12840 // AT3G62700 // AT5G24650 // AT2G01320 // AT4G04…
GO:0015399	F	primary active transmembrane transporter activity	41	1709	252	28362	9.7e-08	6.5e-06	// AT5G03910 // AT1G72750 // AT4G26670 // AT5G50810 // AT5G43970 // AT1G21650 // AT3G52300 // AT4G38920 // AT2G01110 // AT4G00895 // AT4G14870 // AT4G29900 // AT2G18710 // AT4G34720 // AT5G40930 // AT4G02620 // AT4G38510 // AT1G78900 // AT5G39040 // AT4G11150 // AT4G33520 // AT2G33040 // AT5G47030 // AT1G19910 // AT5G57110 // AT4G39850 // AT1G12840 // AT3G62700 // AT5G24650 // AT2G01320 // AT4G04…
GO:0070011	F	peptidase activity, acting on L-amino acid peptides	60	1709	458	28362	1.4e-07	9.4e-06	// AT5G47040 // AT3G60820 // AT3G05350 // AT4G30530 // AT3G15580 // AT5G23540 // AT2G05920 // AT5G35590 // AT1G06430 // AT2G05840 // AT4G30920 // AT3G02090 // AT3G27925 // AT5G38510 // AT3G52640 // AT5G42390 // AT2G25870 // AT2G43070 // AT1G56450 // AT3G14240 // AT2G27350 // AT4G32940 // AT3G11910 // AT2G31440 // AT5G42270 // AT3G14067 // AT2G47940 // AT3G22110 // AT1G78680 // AT2G32480 // AT1G13…
GO:0003755	F	peptidyl-prolyl cis-trans isomerase activity	18	1709	58	28362	1.9e-07	1.2e-05	// AT1G20810 // AT5G64350 // AT3G63400 // AT4G19830 // AT3G15520 // AT4G39710 // AT1G74070 // AT5G13120 // AT3G60370 // AT3G10060 // AT2G43560 // AT3G25220 // AT1G26550 // AT5G13410 // AT2G18040 // AT5G35100 // AT4G26555 // AT3G62030
GO:0019829	F	cation-transporting ATPase activity	21	1709	80	28362	2e-07	1.2e-05	// AT3G28715 // AT4G00895 // AT4G33520 // AT3G52300 // AT5G13450 // AT4G29900 // AT4G34720 // AT1G19910 // AT4G39080 // AT5G57110 // AT4G11150 // AT2G28520 // AT4G02620 // AT4G38510 // AT1G78900 // AT1G75630 // AT5G47030 // AT3G28710 // AT4G38920 // AT1G12840 // AT2G33040
GO:0008047	F	enzyme activator activity	21	1709	82	28362	2.8e-07	1.7e-05	// AT1G07140 // AT3G59920 // AT1G43560 // AT2G44100 // AT5G13300 // AT2G01470 // AT2G41680 // AT1G03680 // AT1G50320 // AT3G15730 // AT3G62290 // AT1G10630 // AT3G63130 // AT5G16400 // AT1G70490 // AT5G12150 // AT2G47170 // AT2G37550 // AT5G54310 // AT1G08680 // AT4G03520
GO:0008565	F	protein transporter activity	29	1709	150	28362	3.3e-07	1.9e-05	// AT1G72750 // AT4G26670 // AT5G43970 // AT1G21900 // AT1G21650 // AT3G07680 // AT5G17020 // AT2G01110 // AT1G27970 // AT5G41685 // AT4G14870 // AT1G60070 // AT2G18710 // AT5G40930 // AT1G04940 // AT5G28750 // AT5G50810 // AT3G09740 // AT5G24650 // AT5G11490 // AT5G19820 // AT4G32760 // AT2G29530 // AT1G75850 // AT5G22780 // AT1G30630 // AT4G11380 // AT1G71480 // AT5G52440
GO:0008144	F	drug binding	12	1709	25	28362	5.3e-07	2.9e-05	// AT1G20810 // AT5G64350 // AT4G19830 // AT4G39710 // AT3G60370 // AT4G33090 // AT3G10060 // AT2G43560 // AT3G25220 // AT4G36760 // AT5G13410 // AT4G26555
GO:0015078	F	hydrogen ion transmembrane transporter activity	27	1709	136	28362	5.3e-07	2.9e-05	// AT4G32260 // AT3G52300 // AT4G32530 // AT4G38920 // AT4G00895 // AT5G13440 // AT1G80230 // AT4G34720 // AT4G02620 // AT4G38510 // AT3G15640 // AT1G15120 // AT4G11150 // AT1G78900 // AT2G33040 // AT1G19910 // AT1G22450 // AT5G47030 // AT1G12840 // AT3G28715 // AT5G13450 // AT3G28710 // AT4G39080 // AT5G13430 // AT2G28520 // AT3G19490 // AT1G75630
GO:0036442	F	hydrogen-exporting ATPase activity	12	1709	26	28362	7.4e-07	4e-05	// AT3G28715 // AT1G12840 // AT3G28710 // AT4G34720 // AT1G19910 // AT4G39080 // AT2G28520 // AT4G02620 // AT1G78900 // AT1G75630 // AT4G38920 // AT4G11150
GO:0008233	F	peptidase activity	65	1709	544	28362	8.6e-07	4.5e-05	// AT5G47040 // AT3G60820 // AT3G05350 // AT4G30530 // AT3G15580 // AT5G23540 // AT2G05920 // AT5G35590 // AT1G06430 // AT2G05840 // AT4G30920 // AT3G02090 // AT3G27925 // AT5G38510 // AT3G52640 // AT2G20725 // AT5G42390 // AT2G25870 // AT3G15710 // AT1G52600 // AT2G43070 // AT1G56450 // AT3G14240 // AT2G27350 // AT4G32940 // AT3G11910 // AT2G31440 // AT5G42270 // AT3G14067 // AT4G29210 // AT3G22…
GO:0016860	F	intramolecular oxidoreductase activity	17	1709	60	28362	1.2e-06	6e-05	// AT5G60640 // AT2G32920 // AT2G21170 // AT5G42740 // AT1G75690 // AT3G54690 // AT4G29010 // AT5G57030 // AT3G06860 // AT5G44520 // AT2G01290 // AT1G07960 // AT3G16110 // AT3G25770 // AT3G25760 // AT4G24620 // AT3G10230
GO:0042625	F	ATPase coupled ion transmembrane transporter activity	21	1709	93	28362	1.6e-06	8.1e-05	// AT3G28715 // AT4G00895 // AT4G33520 // AT3G52300 // AT5G13450 // AT4G29900 // AT4G34720 // AT1G19910 // AT4G39080 // AT5G57110 // AT4G11150 // AT2G28520 // AT4G02620 // AT4G38510 // AT1G78900 // AT1G75630 // AT5G47030 // AT3G28710 // AT4G38920 // AT1G12840 // AT2G33040
GO:0016836	F	hydro-lyase activity	19	1709	79	28362	2.3e-06	0.00011	// AT2G47510 // AT3G58990 // AT5G53850 // AT2G26540 // AT2G43100 // AT2G22230 // AT2G05710 // AT4G29010 // AT1G70410 // AT3G54640 // AT3G06860 // AT3G02720 // AT4G35830 // AT5G14740 // AT2G43090 // AT5G63510 // AT3G23940 // AT4G02610 // AT1G69740
GO:0005507	F	copper ion binding	36	1709	238	28362	2.6e-06	0.00012	// AT2G36950 // AT3G54660 // AT5G20080 // AT1G76100 // AT2G30970 // AT3G52300 // AT3G58610 // AT1G08830 // AT3G13930 // AT1G80600 // AT4G22010 // AT5G63400 // AT3G17240 // AT4G20260 // AT4G33520 // AT1G51390 // AT3G09200 // AT2G14170 // AT5G18100 // AT4G33680 // AT4G35830 // AT1G53240 // AT4G12290 // AT1G22840 // AT3G23940 // AT1G10630 // AT3G08580 // AT2G25060 // AT1G56070 // AT1G15140 // AT4G25…
GO:0019843	F	rRNA binding	21	1709	97	28362	2.9e-06	0.00014	// AT5G14320 // AT4G01560 // AT1G33140 // AT1G35680 // AT3G48930 // AT1G32990 // AT1G48350 // AT2G36000 // AT4G17560 // AT3G04400 // AT4G09730 // AT1G09340 // AT5G13510 // AT3G16080 // AT4G23620 // AT5G61770 // AT1G16740 // AT1G74970 // AT1G29070 // AT3G15190 // AT2G33800
GO:0016209	F	antioxidant activity	30	1709	181	28362	3.5e-06	0.00016	// AT3G54660 // AT1G43560 // AT2G41680 // AT1G20630 // AT3G61770 // AT3G26060 // AT5G42980 // AT4G08390 // AT4G03520 // AT1G08830 // AT2G47730 // AT3G11630 // AT4G09010 // AT1G03680 // AT2G02390 // AT3G52960 // AT3G06050 // AT5G18100 // AT2G25080 // AT1G76080 // AT3G28200 // AT5G06290 // AT4G25100 // AT1G07890 // AT5G34850 // AT1G50320 // AT1G24350 // AT5G16400 // AT1G63460 // AT4G11600
GO:0022853	F	active ion transmembrane transporter activity	21	1709	100	28362	4.4e-06	0.0002	// AT3G28715 // AT4G00895 // AT4G33520 // AT3G52300 // AT5G13450 // AT4G29900 // AT4G34720 // AT1G19910 // AT4G39080 // AT5G57110 // AT4G11150 // AT2G28520 // AT4G02620 // AT4G38510 // AT1G78900 // AT1G75630 // AT5G47030 // AT3G28710 // AT4G38920 // AT1G12840 // AT2G33040
GO:0022892	F	substrate-specific transporter activity	102	1709	1045	28362	5e-06	0.00022	// AT1G72750 // AT4G32530 // AT4G00895 // AT4G14870 // AT5G41685 // AT2G18710 // AT2G33470 // AT5G40930 // AT1G04940 // AT4G11150 // AT5G20090 // AT5G28750 // AT1G64650 // AT1G19910 // AT4G04340 // AT1G12500 // AT5G11490 // AT5G19820 // AT2G15290 // AT2G29530 // AT2G28520 // AT2G26900 // AT4G11380 // AT1G71480 // AT5G14040 // AT5G52440 // AT4G32260 // AT5G64290 // AT5G50810 // AT1G21900 // AT3G52…
GO:0016820	F	hydrolase activity, acting on acid anhydrides, catalyzing transmembrane movement of substances	32	1709	205	28362	5.1e-06	0.00022	// AT5G03910 // AT1G21650 // AT3G52300 // AT4G38920 // AT4G00895 // AT4G29900 // AT4G34720 // AT4G02620 // AT4G38510 // AT1G78900 // AT5G39040 // AT4G11150 // AT4G33520 // AT4G23710 // AT2G33040 // AT5G47030 // AT1G19910 // AT5G57110 // AT4G39850 // AT1G12840 // AT3G62700 // AT2G01320 // AT4G04770 // AT3G28715 // AT5G13450 // AT3G28710 // AT4G39080 // AT1G20260 // AT1G17840 // AT2G28520 // AT3G10…
GO:0008237	F	metallopeptidase activity	19	1709	85	28362	5.7e-06	0.00024	// AT5G42390 // AT2G25870 // AT3G19170 // AT3G05350 // AT1G05140 // AT5G23540 // AT5G42270 // AT4G33090 // AT1G51980 // AT4G30920 // AT3G02090 // AT1G06430 // AT4G36760 // AT4G17830 // AT2G32480 // AT1G13270 // AT5G35220 // AT5G42620 // AT3G27110
GO:0048037	F	cofactor binding	54	1709	451	28362	6.7e-06	0.00027	// AT5G58260 // AT4G31990 // AT5G24060 // AT1G70760 // AT4G12720 // AT3G51840 // AT1G71180 // AT5G36160 // AT1G17290 // AT4G35760 // AT1G19690 // AT1G54580 // AT1G31180 // AT5G19440 // AT1G79750 // AT3G14415 // AT4G33360 // AT5G49970 // AT5G08530 // AT1G09340 // AT1G80600 // AT3G25530 // AT5G62790 // AT1G31812 // AT4G25050 // AT1G24340 // AT1G08200 // AT3G09810 // AT2G04690 // AT5G21430 // AT4G00…
GO:0005528	F	FK506 binding	10	1709	22	28362	7e-06	0.00027	// AT1G20810 // AT5G64350 // AT4G19830 // AT4G39710 // AT3G60370 // AT3G10060 // AT2G43560 // AT3G25220 // AT5G13410 // AT4G26555
GO:0005527	F	macrolide binding	10	1709	22	28362	7e-06	0.00027	// AT1G20810 // AT5G64350 // AT4G19830 // AT4G39710 // AT3G60370 // AT3G10060 // AT2G43560 // AT3G25220 // AT5G13410 // AT4G26555
GO:0051540	F	metal cluster binding	24	1709	131	28362	7.4e-06	0.00028	// AT5G40650 // AT3G07480 // AT5G18400 // AT5G51720 // AT2G31955 // AT2G20860 // AT5G08530 // AT5G13440 // AT1G44446 // AT1G32550 // AT1G04620 // AT2G38270 // AT3G20970 // AT1G51390 // AT2G24820 // AT4G35830 // AT3G23940 // AT4G36390 // AT2G05710 // AT4G22220 // AT4G02580 // AT5G13430 // AT3G27380 // AT1G79010
GO:0051536	F	iron-sulfur cluster binding	24	1709	131	28362	7.4e-06	0.00028	// AT5G40650 // AT3G07480 // AT5G18400 // AT5G51720 // AT2G31955 // AT2G20860 // AT5G08530 // AT5G13440 // AT1G44446 // AT1G32550 // AT1G04620 // AT2G38270 // AT3G20970 // AT1G51390 // AT2G24820 // AT4G35830 // AT3G23940 // AT4G36390 // AT2G05710 // AT4G22220 // AT4G02580 // AT5G13430 // AT3G27380 // AT1G79010
GO:0043167	F	ion binding	296	1709	3821	28362	7.6e-06	0.00028	// AT5G20570 // AT3G54660 // AT4G15560 // AT3G13490 // AT5G48230 // AT2G47450 // AT3G62530 // AT3G59820 // AT4G39960 // AT4G31990 // AT1G31180 // AT3G63520 // AT2G31955 // AT1G23190 // AT5G23070 // AT2G34630 // AT2G20860 // AT5G13430 // AT1G08830 // AT3G58500 // AT5G62790 // AT3G11230 // AT2G31810 // AT3G15730 // AT3G55340 // AT4G35260 // AT4G22010 // AT5G63400 // AT2G32950 // AT2G47850 // AT1G75…
GO:0016616	F	oxidoreductase activity, acting on the CH-OH group of donors, NAD or NADP as acceptor	25	1709	143	28362	9.9e-06	0.00036	// AT4G29010 // AT1G71180 // AT1G76490 // AT2G27680 // AT5G58330 // AT1G31180 // AT5G19440 // AT1G67730 // AT1G79750 // AT4G33360 // AT1G04410 // AT4G13250 // AT3G25530 // AT5G62790 // AT3G06860 // AT4G35260 // AT3G09810 // AT4G00570 // AT3G58610 // AT5G43940 // AT1G53240 // AT1G80560 // AT3G54690 // AT1G22430 // AT5G53580
GO:0005524	F	ATP binding	187	1709	2248	28362	1.3e-05	0.00045	// AT1G14400 // AT3G54660 // AT2G35050 // AT3G13490 // AT2G11890 // AT1G06700 // AT5G49910 // AT4G02420 // AT3G01200 // AT2G37250 // AT4G39960 // AT3G55610 // AT5G19220 // AT5G23070 // AT3G59350 // AT5G05200 // AT1G55090 // AT1G08520 // AT1G63700 // AT3G12780 // AT3G08690 // AT2G02760 // AT1G57870 // AT5G63400 // AT1G07110 // AT3G45300 // AT1G16280 // AT1G48210 // AT1G51390 // AT5G64050 // AT5G57…
GO:0015077	F	monovalent inorganic cation transmembrane transporter activity	31	1709	211	28362	2.1e-05	0.00073	// AT4G33530 // AT4G32260 // AT3G52300 // AT4G38920 // AT4G32530 // AT1G04690 // AT4G00895 // AT5G13440 // AT1G80230 // AT4G34720 // AT3G25410 // AT4G02620 // AT4G38510 // AT3G15640 // AT1G15120 // AT4G11150 // AT1G78900 // AT2G33040 // AT1G19910 // AT1G22450 // AT5G47030 // AT1G12840 // AT3G28715 // AT5G13450 // AT3G28710 // AT4G39080 // AT5G13430 // AT2G28520 // AT3G19490 // AT2G26900 // AT1G75…
GO:0042626	F	ATPase activity, coupled to transmembrane movement of substances	30	1709	202	28362	2.3e-05	0.00081	// AT5G03910 // AT1G21650 // AT3G52300 // AT4G38920 // AT4G00895 // AT4G29900 // AT4G34720 // AT4G02620 // AT4G38510 // AT1G78900 // AT5G39040 // AT4G11150 // AT4G33520 // AT2G33040 // AT5G47030 // AT1G19910 // AT5G57110 // AT4G39850 // AT1G12840 // AT3G62700 // AT2G01320 // AT4G04770 // AT3G28715 // AT5G13450 // AT3G28710 // AT4G39080 // AT1G17840 // AT2G28520 // AT3G10670 // AT1G75630
GO:0043492	F	ATPase activity, coupled to movement of substances	30	1709	203	28362	2.5e-05	0.00086	// AT5G03910 // AT1G21650 // AT3G52300 // AT4G38920 // AT4G00895 // AT4G29900 // AT4G34720 // AT4G02620 // AT4G38510 // AT1G78900 // AT5G39040 // AT4G11150 // AT4G33520 // AT2G33040 // AT5G47030 // AT1G19910 // AT5G57110 // AT4G39850 // AT1G12840 // AT3G62700 // AT2G01320 // AT4G04770 // AT3G28715 // AT5G13450 // AT3G28710 // AT4G39080 // AT1G17840 // AT2G28520 // AT3G10670 // AT1G75630
GO:0043169	F	cation binding	282	1709	3678	28362	2.7e-05	0.0009	// AT5G20570 // AT3G54660 // AT4G15560 // AT3G13490 // AT5G48230 // AT2G47450 // AT3G62530 // AT3G59820 // AT4G39960 // AT5G40650 // AT1G31180 // AT3G63520 // AT2G31955 // AT1G23190 // AT5G23070 // AT2G34630 // AT2G20860 // AT5G13430 // AT1G08830 // AT3G58500 // AT5G62790 // AT3G11230 // AT3G15730 // AT3G55340 // AT4G35260 // AT4G22010 // AT5G63400 // AT2G32950 // AT2G47850 // AT1G75690 // AT3G20…
GO:0005215	F	transporter activity	125	1709	1406	28362	2.8e-05	0.00092	// AT1G72750 // AT4G32530 // AT4G00895 // AT4G14870 // AT2G18710 // AT2G33470 // AT5G40930 // AT5G58070 // AT4G23710 // AT1G04940 // AT4G11150 // AT5G20090 // AT5G28750 // AT1G64650 // AT1G19910 // AT4G04340 // AT1G12500 // AT5G11490 // AT5G19820 // AT4G04770 // AT2G15290 // AT2G29530 // AT2G28520 // AT3G10670 // AT2G26900 // AT4G11380 // AT1G71480 // AT5G14040 // AT5G52440 // AT3G05000 // AT4G32…
GO:0042623	F	ATPase activity, coupled	46	1709	389	28362	4.1e-05	0.0013	// AT4G09730 // AT5G03910 // AT5G11170 // AT1G06430 // AT5G04130 // AT1G53750 // AT1G21650 // AT3G52300 // AT5G47040 // AT4G38920 // AT2G33040 // AT4G00895 // AT2G34560 // AT4G29900 // AT4G34720 // AT4G02620 // AT4G38510 // AT5G42270 // AT1G78900 // AT5G11200 // AT5G39040 // AT4G11150 // AT3G10270 // AT1G16280 // AT4G33520 // AT1G75460 // AT5G26742 // AT3G01540 // AT1G19910 // AT5G57110 // AT4G39…
GO:0046872	F	metal ion binding	280	1709	3673	28362	4.2e-05	0.0014	// AT5G20570 // AT3G54660 // AT4G15560 // AT3G13490 // AT5G48230 // AT2G47450 // AT3G62530 // AT3G59820 // AT4G39960 // AT1G31180 // AT3G63520 // AT2G31955 // AT1G23190 // AT5G23070 // AT2G34630 // AT2G20860 // AT5G13430 // AT1G08830 // AT3G58500 // AT5G62790 // AT3G11230 // AT3G15730 // AT3G55340 // AT4G35260 // AT4G22010 // AT5G63400 // AT2G32950 // AT2G47850 // AT1G75690 // AT3G20810 // AT5G42…
GO:0022884	F	macromolecule transmembrane transporter activity	14	1709	61	28362	7.4e-05	0.0023	// AT1G21900 // AT2G01110 // AT4G14870 // AT1G72750 // AT2G18710 // AT5G43970 // AT2G29530 // AT5G40930 // AT5G50810 // AT1G21650 // AT5G24650 // AT3G07680 // AT4G26670 // AT5G52440
GO:0008320	F	protein transmembrane transporter activity	14	1709	61	28362	7.4e-05	0.0023	// AT1G21900 // AT2G01110 // AT4G14870 // AT1G72750 // AT2G18710 // AT5G43970 // AT2G29530 // AT5G40930 // AT5G50810 // AT1G21650 // AT5G24650 // AT3G07680 // AT4G26670 // AT5G52440
GO:0019899	F	enzyme binding	34	1709	265	28362	9.9e-05	0.003	// AT1G07140 // AT1G14400 // AT1G06700 // AT1G18080 // AT3G59350 // AT3G20060 // AT5G41340 // AT5G17020 // AT2G36060 // AT1G27320 // AT1G27970 // AT4G12060 // AT4G04210 // AT2G02760 // AT1G78900 // AT1G16890 // AT5G62540 // AT5G53300 // AT5G35330 // AT4G02570 // AT5G11490 // AT1G22530 // AT3G02300 // AT2G01470 // AT1G26150 // AT5G13120 // AT5G38560 // AT4G39080 // AT2G28520 // AT5G11580 // AT1G65…
GO:0016635	F	oxidoreductase activity, acting on the CH-CH group of donors, quinone or related compound as acceptor	6	1709	9	28362	0.00011	0.0032	// AT5G40650 // AT3G04870 // AT2G46505 // AT5G66760 // AT3G27380 // AT5G51040
GO:0004576	F	oligosaccharyl transferase activity	6	1709	9	28362	0.00011	0.0032	// AT1G61790 // AT5G66680 // AT4G21150 // AT1G32210 // AT1G34130 // AT2G01720
GO:0016655	F	oxidoreductase activity, acting on NAD(P)H, quinone or similar compound as acceptor	11	1709	40	28362	0.00011	0.0033	// AT5G08530 // AT5G58260 // AT5G47890 // AT3G27890 // AT3G06310 // AT4G02580 // AT5G67590 // AT1G70760 // AT4G35760 // AT5G18800 // AT1G79010
GO:0004222	F	metalloendopeptidase activity	12	1709	50	28362	0.00017	0.0047	// AT5G42390 // AT2G25870 // AT3G19170 // AT1G51980 // AT1G05140 // AT3G02090 // AT5G42270 // AT2G32480 // AT1G06430 // AT5G35220 // AT5G42620 // AT3G27110
GO:0000149	F	SNARE binding	13	1709	58	28362	0.00016	0.0047	// AT4G20410 // AT4G32150 // AT5G39510 // AT3G56190 // AT1G04750 // AT1G11890 // AT5G58060 // AT2G33120 // AT3G09740 // AT5G16830 // AT1G26670 // AT5G11150 // AT3G17440
GO:0032559	F	adenyl ribonucleotide binding	187	1709	2364	28362	0.00017	0.0047	// AT1G14400 // AT3G54660 // AT2G35050 // AT3G13490 // AT2G11890 // AT1G06700 // AT5G49910 // AT4G02420 // AT3G01200 // AT2G37250 // AT4G39960 // AT3G55610 // AT5G19220 // AT5G23070 // AT3G59350 // AT5G05200 // AT1G55090 // AT1G08520 // AT1G63700 // AT3G12780 // AT3G08690 // AT2G02760 // AT1G57870 // AT5G63400 // AT1G07110 // AT3G45300 // AT1G16280 // AT1G48210 // AT1G51390 // AT5G64050 // AT5G57…
GO:0030554	F	adenyl nucleotide binding	187	1709	2366	28362	0.00017	0.0048	// AT1G14400 // AT3G54660 // AT2G35050 // AT3G13490 // AT2G11890 // AT1G06700 // AT5G49910 // AT4G02420 // AT3G01200 // AT2G37250 // AT4G39960 // AT3G55610 // AT5G19220 // AT5G23070 // AT3G59350 // AT5G05200 // AT1G55090 // AT1G08520 // AT1G63700 // AT3G12780 // AT3G08690 // AT2G02760 // AT1G57870 // AT5G63400 // AT1G07110 // AT3G45300 // AT1G16280 // AT1G48210 // AT1G51390 // AT5G64050 // AT5G57…
GO:0015450	F	P-P-bond-hydrolysis-driven protein transmembrane transporter activity	12	1709	51	28362	0.0002	0.0053	// AT2G01110 // AT4G14870 // AT1G72750 // AT2G18710 // AT5G43970 // AT2G29530 // AT5G40930 // AT5G50810 // AT1G21650 // AT5G24650 // AT4G26670 // AT5G52440
GO:0022890	F	inorganic cation transmembrane transporter activity	38	1709	325	28362	0.00023	0.0061	// AT4G33530 // AT4G32260 // AT3G52300 // AT4G38920 // AT4G32530 // AT1G04690 // AT4G00895 // AT5G13440 // AT1G80230 // AT4G29900 // AT4G34720 // AT3G25410 // AT4G02620 // AT4G38510 // AT5G22830 // AT1G78900 // AT1G47240 // AT1G15120 // AT4G11150 // AT4G33520 // AT3G15640 // AT2G33040 // AT5G47030 // AT1G22450 // AT1G19910 // AT5G57110 // AT1G12840 // AT3G28710 // AT3G28715 // AT5G13450 // AT2G15…
GO:0016774	F	phosphotransferase activity, carboxyl group as acceptor	6	1709	11	28362	0.00024	0.0064	// AT1G79550 // AT3G12780 // AT5G14060 // AT1G56190 // AT3G57560 // AT3G55610
GO:0005096	F	GTPase activator activity	11	1709	45	28362	0.00027	0.0071	// AT1G07140 // AT2G44100 // AT5G13300 // AT2G01470 // AT3G59920 // AT3G15730 // AT2G37550 // AT3G63130 // AT5G12150 // AT5G54310 // AT1G08680
GO:0016614	F	oxidoreductase activity, acting on CH-OH group of donors	28	1709	214	28362	0.00029	0.0076	// AT4G29010 // AT1G71180 // AT1G76490 // AT2G27680 // AT5G58330 // AT1G31180 // AT5G19440 // AT1G67730 // AT1G79750 // AT3G14415 // AT4G33360 // AT1G04410 // AT4G13250 // AT3G25530 // AT5G62790 // AT3G06860 // AT4G35260 // AT3G09810 // AT4G00570 // AT3G58610 // AT3G14150 // AT5G43940 // AT4G20830 // AT1G53240 // AT1G80560 // AT3G54690 // AT1G22430 // AT5G53580
GO:0016668	F	oxidoreductase activity, acting on a sulfur group of donors, NAD(P) as acceptor	10	1709	38	28362	0.00031	0.0079	// AT3G54660 // AT1G43560 // AT1G03680 // AT2G41680 // AT1G50320 // AT5G16400 // AT3G17240 // AT5G42980 // AT1G76080 // AT4G03520
GO:0004579	F	dolichyl-diphosphooligosaccharide-protein glycotransferase activity	5	1709	7	28362	0.00033	0.0081	// AT1G32210 // AT1G61790 // AT5G66680 // AT1G34130 // AT4G21150
GO:0016887	F	ATPase activity	54	1709	530	28362	0.00032	0.0081	// AT4G09730 // AT5G03910 // AT5G11170 // AT1G73110 // AT1G06430 // AT5G04130 // AT1G53750 // AT1G21650 // AT3G52300 // AT5G47040 // AT4G32530 // AT4G38920 // AT2G25610 // AT2G33040 // AT4G00895 // AT2G11890 // AT2G16510 // AT2G34560 // AT4G29900 // AT4G34720 // AT4G02620 // AT4G38510 // AT5G42270 // AT1G78900 // AT5G11200 // AT5G39040 // AT4G11150 // AT3G10270 // AT1G16280 // AT4G33520 // AT1G75…
GO:0016627	F	oxidoreductase activity, acting on the CH-CH group of donors	15	1709	81	28362	0.00033	0.0081	// AT1G50430 // AT5G40650 // AT1G06290 // AT5G52100 // AT2G46505 // AT5G18660 // AT3G12800 // AT5G66760 // AT3G51840 // AT3G04870 // AT3G45300 // AT4G14210 // AT3G27380 // AT5G51040 // AT4G01690
GO:0008177	F	succinate dehydrogenase (ubiquinone) activity	5	1709	7	28362	0.00033	0.0081	// AT5G40650 // AT5G66760 // AT3G27380 // AT5G51040 // AT2G46505
GO:0022804	F	active transmembrane transporter activity	59	1709	595	28362	0.00033	0.0081	// AT5G03910 // AT1G72750 // AT4G26670 // AT5G64290 // AT5G50810 // AT5G43970 // AT1G21650 // AT1G20260 // AT3G52300 // AT4G38920 // AT2G01110 // AT4G00895 // AT4G14870 // AT3G21690 // AT4G29900 // AT2G18710 // AT4G34720 // AT3G25410 // AT5G40930 // AT4G02620 // AT4G38510 // AT1G78900 // AT4G04770 // AT5G39040 // AT1G70330 // AT4G33520 // AT4G23710 // AT2G33040 // AT5G47030 // AT1G75630 // AT1G19…
GO:0044444	C	cytoplasmic part	1221	1709	10923	28362	9e-158	1.4e-154	// AT2G32920 // AT3G21865 // AT2G39020 // AT3G12290 // AT5G48230 // AT4G14210 // AT1G76490 // AT3G55750 // AT1G07420 // AT1G31180 // AT2G31610 // AT4G32530 // AT4G15560 // AT2G34630 // AT3G14415 // AT5G27280 // AT3G12080 // AT5G57180 // AT5G27290 // AT3G25530 // AT2G33220 // AT2G31810 // AT1G57870 // AT1G53240 // AT1G08200 // AT2G46280 // AT1G76010 // AT3G53870 // AT1G04940 // AT4G29410 // AT1G09…
GO:0044422	C	organelle part	784	1709	4894	28362	6.9e-153	5.4e-150	// AT2G32920 // AT3G21865 // AT4G14210 // AT1G76490 // AT3G55750 // AT1G31180 // AT2G31610 // AT4G32530 // AT4G15560 // AT2G25610 // AT3G14415 // AT2G33220 // AT3G10070 // AT2G32950 // AT3G53870 // AT1G04940 // AT4G29410 // AT1G09690 // AT3G45300 // AT4G34700 // AT3G57090 // AT3G06550 // AT4G16720 // AT5G65260 // AT4G19830 // AT5G07020 // AT1G19910 // AT3G10350 // AT3G18890 // AT1G20696 // AT3G23…
GO:0044446	C	intracellular organelle part	781	1709	4882	28362	8.9e-152	4.6e-149	// AT2G32920 // AT3G21865 // AT4G14210 // AT1G76490 // AT3G55750 // AT1G31180 // AT2G31610 // AT4G32530 // AT4G15560 // AT2G25610 // AT3G14415 // AT2G33220 // AT3G10070 // AT2G32950 // AT3G53870 // AT1G04940 // AT4G29410 // AT1G09690 // AT3G45300 // AT4G34700 // AT3G57090 // AT3G06550 // AT4G16720 // AT5G65260 // AT4G19830 // AT5G07020 // AT1G19910 // AT3G10350 // AT3G18890 // AT1G20696 // AT3G23…
GO:0005737	C	cytoplasm	1346	1709	13406	28362	6e-149	2.3e-146	// AT4G26650 // AT2G32920 // AT3G21865 // AT2G39020 // AT3G12290 // AT5G48230 // AT4G14210 // AT1G76490 // AT3G55750 // AT1G20090 // AT1G07420 // AT1G31180 // AT2G31610 // AT4G32530 // AT4G15560 // AT2G34630 // AT3G14415 // AT5G27280 // AT3G12080 // AT3G06130 // AT5G57180 // AT5G27290 // AT1G24340 // AT2G33220 // AT1G03400 // AT2G31810 // AT2G36390 // AT1G57870 // AT1G53240 // AT1G08200 // AT2G46…
GO:0009536	C	plastid	687	1709	4213	28362	4.9e-132	1.5e-129	// AT2G32920 // AT4G15560 // AT2G39020 // AT4G14210 // AT1G31180 // AT2G31610 // AT2G34630 // AT3G14415 // AT3G12080 // AT5G57180 // AT5G27290 // AT2G31810 // AT1G04940 // AT3G25860 // AT3G57090 // AT5G28750 // AT4G19830 // AT5G07020 // AT1G19910 // AT3G10350 // AT3G18890 // AT1G53320 // AT1G20510 // AT1G75330 // AT5G51010 // AT5G42765 // AT1G18060 // AT2G15290 // AT5G45030 // AT1G53240 // AT1G33…
GO:0009507	C	chloroplast	681	1709	4148	28362	6.6e-132	1.7e-129	// AT2G32920 // AT4G15560 // AT2G39020 // AT4G14210 // AT1G31180 // AT2G31610 // AT2G34630 // AT3G14415 // AT3G12080 // AT5G57180 // AT5G27290 // AT2G31810 // AT1G04940 // AT3G25860 // AT3G57090 // AT5G28750 // AT4G19830 // AT5G07020 // AT1G19910 // AT3G10350 // AT3G18890 // AT1G20510 // AT1G56500 // AT5G51010 // AT5G42765 // AT1G18060 // AT2G15290 // AT5G45030 // AT1G53240 // AT1G33120 // AT5G13…
GO:0044434	C	chloroplast part	384	1709	1419	28362	4.8e-123	1.1e-120	// AT4G15560 // AT4G14210 // AT1G31180 // AT3G14415 // AT1G04940 // AT3G25860 // AT4G19830 // AT5G07020 // AT3G10350 // AT3G18890 // AT3G23940 // AT5G03880 // AT5G42765 // AT2G15290 // AT5G46290 // AT3G10670 // AT1G56190 // AT3G20390 // AT3G02900 // AT4G26555 // AT5G52440 // AT1G43560 // AT3G52150 // AT4G19170 // AT4G08390 // AT5G47840 // AT2G21160 // AT5G17530 // AT1G32200 // AT2G40300 // AT5G19…
GO:0044435	C	plastid part	384	1709	1455	28362	4.3e-120	8.3e-118	// AT4G15560 // AT4G14210 // AT1G31180 // AT3G14415 // AT1G04940 // AT3G25860 // AT4G19830 // AT5G07020 // AT3G10350 // AT3G18890 // AT3G23940 // AT5G03880 // AT5G42765 // AT2G15290 // AT5G46290 // AT3G10670 // AT1G56190 // AT3G20390 // AT3G02900 // AT4G26555 // AT5G52440 // AT1G43560 // AT3G52150 // AT4G19170 // AT4G08390 // AT5G47840 // AT2G21160 // AT5G17530 // AT1G32200 // AT2G40300 // AT5G19…
GO:0009570	C	chloroplast stroma	215	1709	740	28362	3.4e-71	5.8e-69	// AT3G54660 // AT4G15560 // AT5G05200 // AT3G12780 // AT2G47450 // AT2G41680 // AT1G11430 // AT2G37250 // AT4G16390 // AT1G31180 // AT5G19220 // AT1G65260 // AT4G24620 // AT3G14415 // AT3G62030 // AT1G08520 // AT4G01150 // AT3G25770 // AT5G52100 // AT5G13120 // AT5G62790 // AT1G18500 // AT4G25050 // AT5G50250 // AT4G21210 // AT2G47730 // AT2G43090 // AT1G75690 // AT4G09040 // AT3G25860 // AT2G43…
GO:0044464	C	cell part	1623	1709	22662	28362	5.4e-69	8.4e-67	// AT3G21865 // AT5G48230 // AT1G76490 // AT1G31180 // AT2G34630 // AT3G10070 // AT2G46280 // AT1G76010 // AT3G53870 // AT1G09690 // AT1G16280 // AT3G06550 // AT4G27820 // AT5G65260 // AT5G07020 // AT1G53320 // AT1G20510 // AT1G64090 // AT5G64620 // AT5G13180 // AT4G33250 // AT5G51010 // AT2G01690 // AT3G46430 // AT4G33090 // AT3G13410 // AT5G21090 // AT5G46160 // AT3G10670 // AT3G20390 // AT1G09…
GO:0009532	C	plastid stroma	216	1709	774	28362	6.5e-69	8.5e-67	// AT3G54660 // AT4G15560 // AT5G05200 // AT3G12780 // AT2G47450 // AT2G41680 // AT1G11430 // AT2G37250 // AT4G16390 // AT1G31180 // AT5G19220 // AT1G65260 // AT4G24620 // AT3G14415 // AT3G62030 // AT1G08520 // AT4G01150 // AT3G25770 // AT5G52100 // AT5G13120 // AT5G62790 // AT1G18500 // AT4G25050 // AT5G50250 // AT4G21210 // AT2G47730 // AT2G43090 // AT1G75690 // AT4G09040 // AT3G25860 // AT2G43…
GO:0005623	C	cell	1623	1709	22664	28362	6.1e-69	8.5e-67	// AT3G21865 // AT5G48230 // AT1G76490 // AT1G31180 // AT2G34630 // AT3G10070 // AT2G46280 // AT1G76010 // AT3G53870 // AT1G09690 // AT1G16280 // AT3G06550 // AT4G27820 // AT5G65260 // AT5G07020 // AT1G53320 // AT1G20510 // AT1G64090 // AT5G64620 // AT5G13180 // AT4G33250 // AT5G51010 // AT2G01690 // AT3G46430 // AT4G33090 // AT3G13410 // AT5G21090 // AT5G46160 // AT3G10670 // AT3G20390 // AT1G09…
GO:0005622	C	intracellular	1539	1709	20721	28362	3.7e-65	4.5e-63	// AT3G21865 // AT5G48230 // AT1G76490 // AT1G31180 // AT2G34630 // AT3G10070 // AT2G46280 // AT1G76010 // AT3G53870 // AT1G09690 // AT1G16280 // AT3G06550 // AT4G27820 // AT5G65260 // AT5G07020 // AT1G53320 // AT1G20510 // AT1G64090 // AT5G64620 // AT5G13180 // AT4G33250 // AT5G51010 // AT2G01690 // AT3G46430 // AT4G33090 // AT3G13410 // AT3G11500 // AT3G10670 // AT3G20390 // AT1G09850 // AT5G02…
GO:0044424	C	intracellular part	1537	1709	20693	28362	9.3e-65	1e-62	// AT3G21865 // AT5G48230 // AT1G76490 // AT1G31180 // AT2G34630 // AT3G10070 // AT2G46280 // AT1G76010 // AT3G53870 // AT1G09690 // AT1G16280 // AT3G06550 // AT4G27820 // AT5G65260 // AT5G07020 // AT1G53320 // AT1G20510 // AT1G64090 // AT5G64620 // AT5G13180 // AT4G33250 // AT5G51010 // AT2G01690 // AT3G46430 // AT4G33090 // AT3G13410 // AT3G11500 // AT3G10670 // AT3G20390 // AT1G09850 // AT5G02…
GO:0031967	C	organelle envelope	254	1709	1170	28362	1.4e-62	1.3e-60	// AT1G49410 // AT5G03910 // AT3G12780 // AT5G16620 // AT2G47450 // AT1G11430 // AT3G51820 // AT3G63130 // AT4G39960 // AT4G31990 // AT5G19220 // AT3G08610 // AT1G23190 // AT4G24620 // AT3G62030 // AT4G01150 // AT3G25770 // AT1G34430 // AT3G53560 // AT3G15730 // AT4G25050 // AT5G50250 // AT4G34700 // AT2G47730 // AT5G01500 // AT4G14210 // AT1G04940 // AT3G25860 // AT3G07430 // AT5G67590 // AT3G57…
GO:0031975	C	envelope	254	1709	1170	28362	1.4e-62	1.3e-60	// AT1G49410 // AT5G03910 // AT3G12780 // AT5G16620 // AT2G47450 // AT1G11430 // AT3G51820 // AT3G63130 // AT4G39960 // AT4G31990 // AT5G19220 // AT3G08610 // AT1G23190 // AT4G24620 // AT3G62030 // AT4G01150 // AT3G25770 // AT1G34430 // AT3G53560 // AT3G15730 // AT4G25050 // AT5G50250 // AT4G34700 // AT2G47730 // AT5G01500 // AT4G14210 // AT1G04940 // AT3G25860 // AT3G07430 // AT5G67590 // AT3G57…
GO:0009579	C	thylakoid	179	1709	584	28362	6.1e-62	5.5e-60	// AT3G62530 // AT3G12780 // AT5G16620 // AT2G22230 // AT2G47450 // AT3G51820 // AT4G39960 // AT1G31180 // AT5G08050 // AT3G62030 // AT2G42220 // AT1G08520 // AT4G01150 // AT4G14870 // AT3G53560 // AT2G18710 // AT2G47730 // AT5G01500 // AT1G54780 // AT4G14210 // AT4G13500 // AT5G35100 // AT3G07430 // AT4G19830 // AT5G07020 // AT3G18890 // AT5G20140 // AT3G01440 // AT4G35760 // AT5G19820 // AT5G03…
GO:0043226	C	organelle	1411	1709	18527	28362	7.3e-54	6.3e-52	// AT3G21865 // AT5G48230 // AT1G76490 // AT1G31180 // AT2G34630 // AT3G10070 // AT3G53870 // AT1G09690 // AT1G16280 // AT3G06550 // AT4G27820 // AT5G65260 // AT5G07020 // AT1G53320 // AT1G20510 // AT1G64090 // AT5G64620 // AT5G13180 // AT5G51010 // AT2G01690 // AT3G46430 // AT4G33090 // AT3G13410 // AT3G11500 // AT3G10670 // AT3G20390 // AT1G09850 // AT5G02450 // AT4G26555 // AT1G50430 // AT1G10…
GO:0043229	C	intracellular organelle	1410	1709	18517	28362	1.1e-53	9.3e-52	// AT3G21865 // AT5G48230 // AT1G76490 // AT1G31180 // AT2G34630 // AT3G10070 // AT3G53870 // AT1G09690 // AT1G16280 // AT3G06550 // AT4G27820 // AT5G65260 // AT5G07020 // AT1G53320 // AT1G20510 // AT1G64090 // AT5G64620 // AT5G13180 // AT5G51010 // AT2G01690 // AT3G46430 // AT4G33090 // AT3G13410 // AT3G11500 // AT3G10670 // AT3G20390 // AT1G09850 // AT5G02450 // AT4G26555 // AT1G50430 // AT1G10…
GO:0009534	C	chloroplast thylakoid	155	1709	508	28362	2.3e-53	1.8e-51	// AT5G16620 // AT2G22230 // AT2G47450 // AT3G51820 // AT4G39960 // AT5G08050 // AT3G62030 // AT2G42220 // AT1G08520 // AT4G01150 // AT4G14870 // AT3G53560 // AT2G18710 // AT5G01500 // AT1G54780 // AT4G14210 // AT4G13500 // AT3G25860 // AT3G07430 // AT4G19830 // AT5G07020 // AT3G18890 // AT3G25480 // AT3G01440 // AT4G35760 // AT5G03880 // AT5G42765 // AT5G20140 // AT2G28605 // AT1G21500 // AT1G20…
GO:0031976	C	plastid thylakoid	155	1709	509	28362	2.9e-53	2.1e-51	// AT5G16620 // AT2G22230 // AT2G47450 // AT3G51820 // AT4G39960 // AT5G08050 // AT3G62030 // AT2G42220 // AT1G08520 // AT4G01150 // AT4G14870 // AT3G53560 // AT2G18710 // AT5G01500 // AT1G54780 // AT4G14210 // AT4G13500 // AT3G25860 // AT3G07430 // AT4G19830 // AT5G07020 // AT3G18890 // AT3G25480 // AT3G01440 // AT4G35760 // AT5G03880 // AT5G42765 // AT5G20140 // AT2G28605 // AT1G21500 // AT1G20…
GO:0005829	C	cytosol	313	1709	1993	28362	7.3e-50	5.2e-48	// AT3G60820 // AT3G23600 // AT3G55260 // AT3G12290 // AT5G48230 // AT1G09690 // AT3G59920 // AT3G55750 // AT5G35590 // AT4G00810 // AT3G01200 // AT5G53440 // AT3G53180 // AT2G27530 // AT3G55610 // AT2G31610 // AT1G70730 // AT3G42170 // AT5G56350 // AT4G04210 // AT1G79500 // AT3G62030 // AT1G55090 // AT3G12780 // AT1G34430 // AT2G04390 // AT3G13460 // AT4G26840 // AT3G58500 // AT2G33470 // AT5G14…
GO:0031090	C	organelle membrane	290	1709	1760	28362	1.3e-49	8.7e-48	// AT5G35590 // AT5G03910 // AT3G21865 // AT5G16620 // AT1G72750 // AT3G51820 // AT3G63130 // AT3G20290 // AT3G13870 // AT2G31610 // AT3G08610 // AT4G32530 // AT2G25610 // AT5G02610 // AT5G13430 // AT2G33220 // AT5G66680 // AT3G52640 // AT4G25080 // AT3G12800 // AT3G15730 // AT5G40930 // AT5G63400 // AT2G47730 // AT5G01500 // AT4G23710 // AT5G20650 // AT5G14030 // AT1G04940 // AT4G31780 // AT5G67…
GO:0009526	C	plastid envelope	175	1709	707	28362	2.3e-49	1.5e-47	// AT5G03910 // AT3G12780 // AT5G16620 // AT2G47450 // AT1G11430 // AT3G51820 // AT4G39960 // AT4G31990 // AT5G19220 // AT4G24620 // AT3G62030 // AT4G01150 // AT3G25770 // AT1G34430 // AT3G53560 // AT4G25050 // AT5G50250 // AT2G47730 // AT5G01500 // AT4G14210 // AT1G04940 // AT3G25860 // AT3G07430 // AT4G30950 // AT5G28750 // AT5G17230 // AT1G16880 // AT3G18890 // AT1G15140 // AT1G70730 // AT5G03…
GO:0043227	C	membrane-bounded organelle	1379	1709	18217	28362	7.2e-48	4.5e-46	// AT3G21865 // AT5G48230 // AT1G76490 // AT1G31180 // AT2G34630 // AT3G10070 // AT1G16280 // AT3G06550 // AT4G27820 // AT5G65260 // AT5G07020 // AT1G53320 // AT1G20510 // AT1G64090 // AT5G64620 // AT5G13180 // AT5G51010 // AT2G01690 // AT3G46430 // AT4G33090 // AT3G13410 // AT3G11500 // AT3G10670 // AT3G20390 // AT1G09850 // AT5G02450 // AT4G26555 // AT1G50430 // AT1G10290 // AT4G04470 // AT2G05…
GO:0043231	C	intracellular membrane-bounded organelle	1378	1709	18205	28362	9.9e-48	5.9e-46	// AT3G21865 // AT5G48230 // AT1G76490 // AT1G31180 // AT2G34630 // AT3G10070 // AT1G16280 // AT3G06550 // AT4G27820 // AT5G65260 // AT5G07020 // AT1G53320 // AT1G20510 // AT1G64090 // AT5G64620 // AT5G13180 // AT5G51010 // AT2G01690 // AT3G46430 // AT4G33090 // AT3G13410 // AT3G11500 // AT3G10670 // AT3G20390 // AT1G09850 // AT5G02450 // AT4G26555 // AT1G50430 // AT1G10290 // AT4G04470 // AT2G05…
GO:0009941	C	chloroplast envelope	169	1709	688	28362	2.8e-47	1.6e-45	// AT5G03910 // AT3G12780 // AT5G16620 // AT2G47450 // AT1G11430 // AT3G51820 // AT4G39960 // AT4G31990 // AT5G19220 // AT4G24620 // AT3G62030 // AT4G01150 // AT3G25770 // AT1G34430 // AT3G53560 // AT4G25050 // AT5G50250 // AT2G47730 // AT5G01500 // AT4G14210 // AT1G04940 // AT3G25860 // AT3G07430 // AT4G30950 // AT5G28750 // AT5G17230 // AT1G16880 // AT3G18890 // AT1G15140 // AT5G03880 // AT5G20…
GO:0031984	C	organelle subcompartment	183	1709	817	28362	2.5e-46	1.4e-44	// AT5G16620 // AT2G22230 // AT2G47450 // AT3G51820 // AT4G39960 // AT5G08050 // AT3G62030 // AT2G42220 // AT1G08520 // AT4G01150 // AT4G14870 // AT3G53560 // AT2G18710 // AT5G01500 // AT1G54780 // AT4G14210 // AT4G13500 // AT3G25860 // AT3G07430 // AT5G49720 // AT4G19830 // AT1G64650 // AT3G18890 // AT3G25480 // AT3G01440 // AT4G35760 // AT1G64090 // AT5G03880 // AT5G42765 // AT5G20140 // AT2G28…
GO:0032991	C	macromolecular complex	361	1709	2658	28362	7.3e-45	3.9e-43	// AT1G09690 // AT3G55750 // AT2G31610 // AT4G32530 // AT2G33220 // AT3G10070 // AT2G46280 // AT2G32950 // AT3G53870 // AT4G29410 // AT3G25860 // AT4G16720 // AT1G19910 // AT1G20696 // AT5G11490 // AT1G66580 // AT4G33250 // AT2G15290 // AT2G01690 // AT3G46430 // AT1G66070 // AT3G11500 // AT1G33120 // AT3G57785 // AT3G15160 // AT5G11150 // AT5G02450 // AT5G52440 // AT1G67350 // AT1G18080 // AT5G47…
GO:0044436	C	thylakoid part	133	1709	463	28362	2.2e-43	1.1e-41	// AT3G62530 // AT5G16620 // AT2G47450 // AT3G51820 // AT4G39960 // AT5G08050 // AT3G62030 // AT2G42220 // AT4G01150 // AT4G14870 // AT3G53560 // AT2G18710 // AT5G01500 // AT1G54780 // AT1G75690 // AT5G35100 // AT3G07430 // AT4G19830 // AT5G07020 // AT3G18890 // AT3G25480 // AT3G01440 // AT4G35760 // AT5G19820 // AT5G03880 // AT5G42765 // AT5G20140 // AT2G28605 // AT1G20340 // AT1G77090 // AT1G71…
GO:0016020	C	membrane	793	1709	8532	28362	5.4e-43	2.7e-41	// AT2G32920 // AT3G21865 // AT3G16270 // AT5G48230 // AT1G76490 // AT3G55750 // AT1G04300 // AT2G31610 // AT4G32530 // AT2G25610 // AT3G52470 // AT3G12780 // AT2G33220 // AT2G04900 // AT4G34700 // AT3G53870 // AT1G04940 // AT4G29410 // AT3G25860 // AT3G27110 // AT3G57090 // AT3G06550 // AT4G16720 // AT3G15640 // AT5G07020 // AT2G21190 // AT1G19910 // AT3G10350 // AT3G18890 // AT1G53320 // AT1G20…
GO:0034357	C	photosynthetic membrane	118	1709	422	28362	1.3e-37	6.3e-36	// AT3G62530 // AT5G16620 // AT2G47450 // AT3G51820 // AT4G39960 // AT5G08050 // AT3G62030 // AT2G42220 // AT4G01150 // AT4G14870 // AT3G53560 // AT2G18710 // AT5G01500 // AT1G54780 // AT1G75690 // AT3G07430 // AT5G28750 // AT5G07020 // AT3G18890 // AT3G25480 // AT3G01440 // AT4G35760 // AT5G19820 // AT5G03880 // AT5G42765 // AT5G20140 // AT2G28605 // AT1G20340 // AT1G77090 // AT1G71480 // AT5G52…
GO:0042651	C	thylakoid membrane	117	1709	421	28362	4.4e-37	2.1e-35	// AT3G62530 // AT5G16620 // AT2G47450 // AT3G51820 // AT4G39960 // AT5G08050 // AT3G62030 // AT2G42220 // AT4G01150 // AT4G14870 // AT3G53560 // AT2G18710 // AT5G01500 // AT1G54780 // AT1G75690 // AT3G07430 // AT5G28750 // AT5G07020 // AT3G18890 // AT3G25480 // AT3G01440 // AT4G35760 // AT5G19820 // AT5G03880 // AT5G42765 // AT5G20140 // AT2G28605 // AT1G20340 // AT1G77090 // AT1G71480 // AT5G52…
GO:0098796	C	membrane protein complex	137	1709	597	28362	1.2e-35	5.5e-34	// AT3G62530 // AT5G16620 // AT1G72750 // AT3G08610 // AT4G32530 // AT5G66680 // AT2G33220 // AT5G40930 // AT2G31440 // AT4G23710 // AT4G11150 // AT4G30600 // AT5G28750 // AT2G47690 // AT3G06310 // AT3G01440 // AT5G11490 // AT5G16830 // AT5G19820 // AT2G15290 // AT2G01690 // AT2G28605 // AT3G46430 // AT1G21500 // AT4G02580 // AT1G51980 // AT4G26710 // AT2G28520 // AT1G77090 // AT3G57785 // AT5G40…
GO:0009535	C	chloroplast thylakoid membrane	110	1709	400	28362	1.4e-34	6.4e-33	// AT5G16620 // AT2G47450 // AT3G51820 // AT4G39960 // AT5G08050 // AT3G62030 // AT2G42220 // AT4G01150 // AT4G14870 // AT3G53560 // AT2G18710 // AT5G01500 // AT1G54780 // AT1G75690 // AT3G07430 // AT5G28750 // AT5G07020 // AT3G18890 // AT3G25480 // AT3G01440 // AT4G35760 // AT5G03880 // AT5G42765 // AT5G20140 // AT1G20340 // AT1G71480 // AT5G52440 // AT4G32260 // AT1G31330 // AT1G73110 // AT5G42…
GO:0055035	C	plastid thylakoid membrane	110	1709	401	28362	1.7e-34	7.5e-33	// AT5G16620 // AT2G47450 // AT3G51820 // AT4G39960 // AT5G08050 // AT3G62030 // AT2G42220 // AT4G01150 // AT4G14870 // AT3G53560 // AT2G18710 // AT5G01500 // AT1G54780 // AT1G75690 // AT3G07430 // AT5G28750 // AT5G07020 // AT3G18890 // AT3G25480 // AT3G01440 // AT4G35760 // AT5G03880 // AT5G42765 // AT5G20140 // AT1G20340 // AT1G71480 // AT5G52440 // AT4G32260 // AT1G31330 // AT1G73110 // AT5G42…
GO:0005773	C	vacuole	214	1709	1359	28362	1.2e-33	4.9e-32	// AT2G32920 // AT5G35590 // AT3G13870 // AT3G55260 // AT4G14100 // AT4G35860 // AT4G33530 // AT2G31610 // AT4G32530 // AT3G56310 // AT2G25610 // AT3G14415 // AT5G02610 // AT1G52740 // AT5G66680 // AT3G52640 // AT3G12800 // AT3G15730 // AT5G54310 // AT5G40930 // AT5G63400 // AT2G47730 // AT4G23710 // AT5G14030 // AT4G11150 // AT4G34700 // AT5G49720 // AT3G24160 // AT5G20090 // AT1G64650 // AT5G18…
GO:0098805	C	whole membrane	166	1709	925	28362	9.4e-32	3.8e-30	// AT5G35590 // AT3G13870 // AT3G21865 // AT5G35200 // AT4G33530 // AT2G31610 // AT5G11490 // AT5G02610 // AT5G66680 // AT3G52640 // AT3G12800 // AT5G40930 // AT5G63400 // AT2G47730 // AT4G23710 // AT5G14030 // AT4G11150 // AT3G57090 // AT3G24160 // AT5G20090 // AT5G52240 // AT1G19910 // AT5G50850 // AT4G25570 // AT1G64090 // AT5G16830 // AT1G66580 // AT2G01690 // AT5G39040 // AT2G05710 // AT5G39…
GO:0098588	C	bounding membrane of organelle	186	1709	1213	28362	5.7e-28	2.2e-26	// AT5G35590 // AT3G13870 // AT3G21865 // AT3G20290 // AT4G33530 // AT2G31610 // AT5G11490 // AT4G32530 // AT2G25610 // AT5G02610 // AT5G66680 // AT3G52640 // AT3G12800 // AT5G40930 // AT5G63400 // AT2G47730 // AT4G23710 // AT5G14030 // AT4G38510 // AT4G11150 // AT4G30600 // AT3G57090 // AT3G06550 // AT3G24160 // AT5G20090 // AT1G64650 // AT1G19910 // AT4G17530 // AT5G50850 // AT4G25570 // AT1G64…
GO:0005774	C	vacuolar membrane	136	1709	720	28362	5.7e-28	2.2e-26	// AT5G35590 // AT3G13870 // AT2G31610 // AT5G02610 // AT5G66680 // AT3G52640 // AT3G12800 // AT5G40930 // AT5G63400 // AT2G47730 // AT4G23710 // AT5G14030 // AT4G11150 // AT3G24160 // AT5G20090 // AT5G52240 // AT1G19910 // AT5G50850 // AT4G25570 // AT1G64090 // AT5G16830 // AT1G66580 // AT2G01690 // AT4G20850 // AT2G05710 // AT5G39510 // AT1G51980 // AT1G33120 // AT2G28520 // AT5G11150 // AT5G02…
GO:0044437	C	vacuolar part	136	1709	725	28362	1e-27	3.9e-26	// AT5G35590 // AT3G13870 // AT2G31610 // AT5G02610 // AT5G66680 // AT3G52640 // AT3G12800 // AT5G40930 // AT5G63400 // AT2G47730 // AT4G23710 // AT5G14030 // AT4G11150 // AT3G24160 // AT5G20090 // AT5G52240 // AT1G19910 // AT5G50850 // AT4G25570 // AT1G64090 // AT5G16830 // AT1G66580 // AT2G01690 // AT4G20850 // AT2G05710 // AT5G39510 // AT1G51980 // AT1G33120 // AT2G28520 // AT5G11150 // AT5G02…
GO:0043234	C	protein complex	233	1709	1834	28362	1.3e-24	4.7e-23	// AT2G47510 // AT5G20570 // AT5G16620 // AT1G72750 // AT1G75510 // AT3G60820 // AT3G08610 // AT4G32530 // AT3G57290 // AT1G52740 // AT5G66680 // AT2G06530 // AT3G58500 // AT2G33220 // AT5G12370 // AT3G10070 // AT3G18035 // AT5G40930 // AT2G46280 // AT2G32950 // AT4G23710 // AT4G11150 // AT4G30600 // AT1G55900 // AT5G28750 // AT2G33040 // AT2G47690 // AT1G19910 // AT1G48620 // AT3G01440 // AT1G54…
GO:0019866	C	organelle inner membrane	88	1709	371	28362	4.7e-24	1.7e-22	// AT5G16620 // AT1G72750 // AT3G08610 // AT2G33220 // AT5G40930 // AT1G04940 // AT4G11150 // AT4G30950 // AT5G20090 // AT2G47690 // AT3G06310 // AT3G18890 // AT2G15290 // AT3G46430 // AT2G29530 // AT1G51980 // AT3G57785 // AT5G14040 // AT5G40770 // AT1G67350 // AT5G64290 // AT5G47570 // AT4G02580 // AT3G52300 // AT5G08530 // AT5G66760 // AT4G32060 // AT2G46505 // AT4G34700 // AT5G40810 // AT5G19…
GO:1990904	C	ribonucleoprotein complex	140	1709	852	28362	1.3e-23	4.5e-22	// AT2G43810 // AT2G47450 // AT1G09690 // AT1G07070 // AT4G29390 // AT4G00810 // AT3G55460 // AT2G27530 // AT2G31610 // AT3G62030 // AT1G34430 // AT2G04390 // AT2G05220 // AT5G50250 // AT1G80070 // AT5G61770 // AT5G52470 // AT1G43190 // AT3G44010 // AT4G30600 // AT4G16720 // AT3G55750 // AT3G05560 // AT1G66580 // AT5G25757 // AT3G14010 // AT1G02780 // AT1G26880 // AT1G66070 // AT5G46160 // AT1G09…
GO:0030529	C	intracellular ribonucleoprotein complex	140	1709	852	28362	1.3e-23	4.5e-22	// AT2G43810 // AT2G47450 // AT1G09690 // AT1G07070 // AT4G29390 // AT4G00810 // AT3G55460 // AT2G27530 // AT2G31610 // AT3G62030 // AT1G34430 // AT2G04390 // AT2G05220 // AT5G50250 // AT1G80070 // AT5G61770 // AT5G52470 // AT1G43190 // AT3G44010 // AT4G30600 // AT4G16720 // AT3G55750 // AT3G05560 // AT1G66580 // AT5G25757 // AT3G14010 // AT1G02780 // AT1G26880 // AT1G66070 // AT5G46160 // AT1G09…
GO:0005840	C	ribosome	99	1709	499	28362	6.1e-22	2.1e-20	// AT1G09690 // AT3G55750 // AT4G00810 // AT2G27530 // AT2G31610 // AT3G62030 // AT1G34430 // AT2G04390 // AT2G05220 // AT3G53870 // AT4G29410 // AT4G11150 // AT2G16930 // AT4G16720 // AT4G29390 // AT3G05560 // AT1G66580 // AT1G02780 // AT4G20850 // AT1G09340 // AT1G33120 // AT5G55140 // AT4G12600 // AT1G77940 // AT3G44010 // AT5G48760 // AT1G18080 // AT3G04840 // AT2G05840 // AT2G21330 // AT3G16…
GO:0022626	C	cytosolic ribosome	75	1709	323	28362	3.2e-20	1e-18	// AT5G10360 // AT4G36130 // AT3G52300 // AT5G02610 // AT1G18080 // AT1G09690 // AT1G20630 // AT5G22440 // AT3G04840 // AT5G03850 // AT2G05840 // AT1G25260 // AT2G27530 // AT3G16080 // AT2G31610 // AT3G49080 // AT1G15930 // AT1G74970 // AT5G48760 // AT2G36620 // AT1G32990 // AT1G14320 // AT3G53740 // AT1G34430 // AT2G04390 // AT1G56450 // AT2G05220 // AT5G55070 // AT3G25860 // AT1G72370 // AT2G28…
GO:0044445	C	cytosolic part	77	1709	350	28362	1.5e-19	4.9e-18	// AT5G10360 // AT4G36130 // AT3G52300 // AT5G02610 // AT1G18080 // AT1G09690 // AT1G20630 // AT5G22440 // AT3G04840 // AT5G03850 // AT2G05840 // AT1G25260 // AT2G27530 // AT3G16080 // AT2G31610 // AT3G49080 // AT1G15930 // AT1G74970 // AT5G48760 // AT2G36620 // AT1G32990 // AT1G14320 // AT3G53740 // AT1G34430 // AT2G04390 // AT1G56450 // AT2G05220 // AT5G55070 // AT3G25860 // AT3G57290 // AT1G72…
GO:0044429	C	mitochondrial part	89	1709	486	28362	6.5e-18	2.1e-16	// AT1G72750 // AT3G08610 // AT2G31955 // AT2G20860 // AT2G33220 // AT3G15730 // AT5G40930 // AT4G11150 // AT3G45300 // AT5G67590 // AT3G57090 // AT5G20090 // AT2G47690 // AT3G06310 // AT5G50850 // AT3G46430 // AT4G22220 // AT2G29530 // AT1G51980 // AT3G57785 // AT5G14040 // AT5G40770 // AT5G20080 // AT1G67350 // AT5G47570 // AT4G02580 // AT3G52300 // AT5G08530 // AT5G66760 // AT4G32060 // AT2G46…
GO:1990204	C	oxidoreductase complex	47	1709	146	28362	1.1e-17	3.3e-16	// AT5G40650 // AT3G05410 // AT1G67350 // AT5G47570 // AT3G02090 // AT4G00585 // AT3G08610 // AT3G52200 // AT5G08530 // AT5G13440 // AT3G13930 // AT5G13430 // AT2G33220 // AT2G42310 // AT2G46505 // AT5G52840 // AT5G67590 // AT4G34700 // AT3G17240 // AT1G15120 // AT5G40810 // AT1G77090 // AT3G12260 // AT1G76450 // AT5G55070 // AT5G63510 // AT2G47690 // AT3G06310 // AT3G01440 // AT5G18800 // AT2G20…
GO:0031977	C	thylakoid lumen	39	1709	96	28362	1.1e-17	3.4e-16	// AT1G20810 // AT5G64350 // AT1G20340 // AT3G23400 // AT1G12250 // AT3G26060 // AT3G27925 // AT3G62030 // AT2G26340 // AT3G21055 // AT3G53560 // AT3G60370 // AT2G43560 // AT5G53490 // AT1G54780 // AT5G35100 // AT1G77090 // AT4G19830 // AT4G39710 // AT1G74070 // AT3G15520 // AT4G11010 // AT4G18370 // AT3G01440 // AT2G28605 // AT1G03600 // AT2G37400 // AT3G55330 // AT5G13120 // AT1G76100 // AT3G10…
GO:0043232	C	intracellular non-membrane-bounded organelle	186	1709	1543	28362	1.5e-17	4.5e-16	// AT5G46160 // AT3G62530 // AT1G09690 // AT3G55750 // AT4G00810 // AT3G63130 // AT2G27530 // AT2G31610 // AT1G14830 // AT3G62030 // AT1G52740 // AT5G66680 // AT1G34430 // AT2G04390 // AT2G05220 // AT3G58500 // AT3G18035 // AT3G53870 // AT5G52470 // AT1G43190 // AT2G03680 // AT3G44010 // AT1G25260 // AT2G16930 // AT4G16720 // AT1G20090 // AT4G29390 // AT3G05560 // AT5G50850 // AT3G14600 // AT1G20…
GO:0043228	C	non-membrane-bounded organelle	186	1709	1543	28362	1.5e-17	4.5e-16	// AT5G46160 // AT3G62530 // AT1G09690 // AT3G55750 // AT4G00810 // AT3G63130 // AT2G27530 // AT2G31610 // AT1G14830 // AT3G62030 // AT1G52740 // AT5G66680 // AT1G34430 // AT2G04390 // AT2G05220 // AT3G58500 // AT3G18035 // AT3G53870 // AT5G52470 // AT1G43190 // AT2G03680 // AT3G44010 // AT1G25260 // AT2G16930 // AT4G16720 // AT1G20090 // AT4G29390 // AT3G05560 // AT5G50850 // AT3G14600 // AT1G20…
GO:0012505	C	endomembrane system	235	1709	2143	28362	1.6e-17	4.6e-16	// AT2G32920 // AT3G13870 // AT5G35200 // AT1G22530 // AT1G76490 // AT4G35860 // AT5G47780 // AT3G63130 // AT1G35160 // AT3G63520 // AT3G07950 // AT4G32530 // AT2G25610 // AT5G16830 // AT1G71220 // AT5G66680 // AT2G15280 // AT3G08530 // AT5G43460 // AT5G59960 // AT3G15730 // AT3G55340 // AT1G33490 // AT2G31440 // AT5G58070 // AT4G23710 // AT1G47200 // AT5G14030 // AT3G62580 // AT2G24940 // AT4G11…
GO:0005740	C	mitochondrial envelope	76	1709	376	28362	1.6e-17	4.6e-16	// AT1G49410 // AT4G01100 // AT1G26340 // AT5G20080 // AT3G12260 // AT1G72750 // AT4G26670 // AT1G55900 // AT4G11010 // AT5G43970 // AT5G18400 // AT3G02090 // AT4G00585 // AT3G52300 // AT3G08610 // AT3G57785 // AT5G08530 // AT5G13440 // AT5G13430 // AT2G29530 // AT4G32060 // AT1G67350 // AT3G15730 // AT5G18800 // AT5G40930 // AT2G46505 // AT2G22500 // AT5G52840 // AT1G24267 // AT5G42130 // AT5G63…
GO:0098798	C	mitochondrial protein complex	49	1709	165	28362	3.2e-17	9e-16	// AT5G40650 // AT1G67350 // AT1G72750 // AT4G26670 // AT1G55900 // AT5G43970 // AT3G02090 // AT4G00585 // AT3G52300 // AT3G08610 // AT5G08530 // AT5G13440 // AT5G13430 // AT2G33220 // AT5G18800 // AT5G40930 // AT2G46505 // AT5G52840 // AT5G67590 // AT5G63510 // AT3G17240 // AT1G15120 // AT4G11150 // AT5G40810 // AT3G12260 // AT3G06310 // AT2G47690 // AT5G47030 // AT5G47570 // AT5G24650 // AT5G41…
GO:0098800	C	inner mitochondrial membrane protein complex	47	1709	153	28362	4.8e-17	1.3e-15	// AT5G40650 // AT1G67350 // AT1G72750 // AT4G26670 // AT1G55900 // AT5G47570 // AT3G02090 // AT4G00585 // AT3G52300 // AT3G08610 // AT5G08530 // AT5G13440 // AT5G13430 // AT2G33220 // AT5G18800 // AT5G40930 // AT2G46505 // AT5G52840 // AT5G67590 // AT5G63510 // AT3G17240 // AT1G15120 // AT4G11150 // AT5G40810 // AT3G12260 // AT3G06310 // AT2G47690 // AT5G47030 // AT5G24650 // AT2G42310 // AT2G20…
GO:0044455	C	mitochondrial membrane part	52	1709	191	28362	7.6e-17	2e-15	// AT5G40810 // AT5G40650 // AT1G67350 // AT1G72750 // AT4G26670 // AT1G55900 // AT5G43970 // AT3G02090 // AT4G00585 // AT3G52300 // AT3G08610 // AT5G08530 // AT5G13440 // AT5G13430 // AT2G33220 // AT5G18800 // AT5G40930 // AT2G46505 // AT5G52840 // AT1G24267 // AT5G63510 // AT3G17240 // AT1G15120 // AT4G11150 // AT5G67590 // AT3G12260 // AT5G20090 // AT3G06310 // AT2G47690 // AT5G47030 // AT5G27…
GO:0031978	C	plastid thylakoid lumen	35	1709	81	28362	1.2e-16	3e-15	// AT1G20810 // AT5G64350 // AT1G20340 // AT1G12250 // AT3G26060 // AT3G27925 // AT2G26340 // AT3G21055 // AT3G53560 // AT3G60370 // AT2G43560 // AT5G53490 // AT1G54780 // AT1G77090 // AT4G19830 // AT4G39710 // AT1G74070 // AT3G15520 // AT4G11010 // AT4G18370 // AT3G01440 // AT2G28605 // AT1G03600 // AT2G37400 // AT3G55330 // AT5G13120 // AT1G76100 // AT3G10060 // AT1G76450 // AT4G24930 // AT3G44…
GO:0009543	C	chloroplast thylakoid lumen	35	1709	81	28362	1.2e-16	3e-15	// AT1G20810 // AT5G64350 // AT1G20340 // AT1G12250 // AT3G26060 // AT3G27925 // AT2G26340 // AT3G21055 // AT3G53560 // AT3G60370 // AT2G43560 // AT5G53490 // AT1G54780 // AT1G77090 // AT4G19830 // AT4G39710 // AT1G74070 // AT3G15520 // AT4G11010 // AT4G18370 // AT3G01440 // AT2G28605 // AT1G03600 // AT2G37400 // AT3G55330 // AT5G13120 // AT1G76100 // AT3G10060 // AT1G76450 // AT4G24930 // AT3G44…
GO:0031966	C	mitochondrial membrane	71	1709	362	28362	7.3e-16	1.8e-14	// AT1G49410 // AT4G01100 // AT1G26340 // AT3G12260 // AT1G72750 // AT4G26670 // AT1G55900 // AT4G11010 // AT5G43970 // AT3G02090 // AT4G00585 // AT3G52300 // AT3G08610 // AT3G57785 // AT5G08530 // AT5G13440 // AT5G13430 // AT2G29530 // AT4G32060 // AT1G67350 // AT3G15730 // AT5G18800 // AT5G40930 // AT2G46505 // AT2G22500 // AT5G52840 // AT1G24267 // AT5G42130 // AT5G63510 // AT3G17240 // AT1G15…
GO:0070469	C	respiratory chain	41	1709	125	28362	7.4e-16	1.9e-14	// AT5G40650 // AT1G67350 // AT5G47570 // AT3G02090 // AT4G00585 // AT3G08610 // AT5G08530 // AT5G13440 // AT5G13430 // AT2G33220 // AT4G22260 // AT2G42310 // AT2G46505 // AT5G52840 // AT5G67590 // AT3G17240 // AT1G15120 // AT5G40810 // AT3G12260 // AT5G63510 // AT2G47690 // AT3G06310 // AT1G22840 // AT5G18800 // AT2G44620 // AT2G20360 // AT4G34700 // AT1G76200 // AT3G46430 // AT3G18410 // AT5G40…
GO:0005743	C	mitochondrial inner membrane	62	1709	287	28362	1.1e-15	2.7e-14	// AT5G40810 // AT5G40650 // AT1G67350 // AT1G72750 // AT4G26670 // AT1G55900 // AT4G11010 // AT5G47570 // AT3G02090 // AT4G00585 // AT3G52300 // AT3G08610 // AT5G08530 // AT5G13440 // AT5G13430 // AT2G33220 // AT4G32060 // AT5G18800 // AT5G40930 // AT2G46505 // AT5G52840 // AT2G29530 // AT5G42130 // AT5G63510 // AT3G17240 // AT1G15120 // AT4G11150 // AT5G67590 // AT3G12260 // AT5G19760 // AT5G20…
GO:0098803	C	respiratory chain complex	38	1709	108	28362	1.3e-15	3.2e-14	// AT5G40650 // AT1G67350 // AT5G47570 // AT3G02090 // AT4G00585 // AT3G08610 // AT5G08530 // AT5G13440 // AT5G13430 // AT2G33220 // AT2G42310 // AT2G46505 // AT5G52840 // AT5G67590 // AT3G17240 // AT1G15120 // AT5G40810 // AT3G12260 // AT5G63510 // AT2G47690 // AT3G06310 // AT5G18800 // AT2G20360 // AT4G34700 // AT1G76200 // AT3G46430 // AT3G18410 // AT5G40770 // AT4G02580 // AT1G51980 // AT5G66…
GO:0005746	C	mitochondrial respiratory chain	37	1709	108	28362	6.2e-15	1.5e-13	// AT5G40650 // AT1G67350 // AT5G47570 // AT3G02090 // AT4G00585 // AT3G08610 // AT5G08530 // AT5G13440 // AT5G13430 // AT2G33220 // AT2G42310 // AT2G46505 // AT5G52840 // AT5G67590 // AT3G17240 // AT1G15120 // AT5G40810 // AT3G12260 // AT5G63510 // AT2G47690 // AT3G06310 // AT5G18800 // AT2G20360 // AT4G34700 // AT1G76200 // AT3G46430 // AT3G18410 // AT5G40770 // AT4G02580 // AT1G51980 // AT5G66…
GO:0042170	C	plastid membrane	57	1709	265	28362	1.8e-14	4.3e-13	// AT1G26340 // AT5G16620 // AT3G51140 // AT4G31780 // AT5G64290 // AT1G42960 // AT3G51820 // AT1G33265 // AT1G21650 // AT1G65260 // AT5G51020 // AT4G30950 // AT4G13590 // AT3G61870 // AT1G78620 // AT5G43750 // AT5G03910 // AT1G44446 // AT5G58070 // AT5G22830 // AT5G42130 // AT1G04940 // AT4G35450 // AT5G06130 // AT5G66380 // AT4G33520 // AT4G02510 // AT5G17230 // AT5G58560 // AT1G06950 // AT5G57…
GO:0005794	C	Golgi apparatus	145	1709	1182	28362	2.2e-14	5.1e-13	// AT2G32920 // AT3G13870 // AT5G35200 // AT1G22530 // AT4G35860 // AT3G63520 // AT5G11490 // AT4G32530 // AT2G25610 // AT5G66680 // AT3G55340 // AT5G55290 // AT5G58070 // AT4G23710 // AT5G14030 // AT4G11150 // AT5G36290 // AT5G49720 // AT3G24160 // AT1G64650 // AT4G17530 // AT5G40370 // AT3G07950 // AT5G16830 // AT5G39510 // AT3G52640 // AT1G09340 // AT4G26710 // AT2G28520 // AT1G26850 // AT4G11…
GO:0031969	C	chloroplast membrane	56	1709	259	28362	2.6e-14	5.9e-13	// AT1G26340 // AT5G16620 // AT3G51140 // AT4G31780 // AT5G64290 // AT1G42960 // AT3G51820 // AT1G33265 // AT1G21650 // AT1G65260 // AT5G51020 // AT4G30950 // AT4G13590 // AT3G61870 // AT1G78620 // AT5G43750 // AT5G03910 // AT1G44446 // AT5G58070 // AT5G22830 // AT5G42130 // AT1G04940 // AT4G35450 // AT5G06130 // AT5G66380 // AT4G33520 // AT4G02510 // AT5G17230 // AT5G58560 // AT1G06950 // AT5G57…
GO:0044391	C	ribosomal subunit	63	1709	322	28362	3.4e-14	7.7e-13	// AT5G10360 // AT4G36130 // AT5G48760 // AT1G09690 // AT5G22440 // AT3G04840 // AT5G03850 // AT5G35530 // AT2G27530 // AT3G06320 // AT2G31610 // AT3G49080 // AT1G15930 // AT1G74970 // AT5G02610 // AT1G32990 // AT1G14320 // AT3G53740 // AT2G36620 // AT2G04390 // AT2G05220 // AT1G66580 // AT1G72370 // AT3G53870 // AT4G26230 // AT4G29410 // AT1G74270 // AT3G44010 // AT3G14600 // AT5G14320 // AT4G31…
GO:0071944	C	cell periphery	379	1709	4309	28362	9.7e-14	2.1e-12	// AT2G32920 // AT5G48230 // AT1G04300 // AT3G52470 // AT3G12780 // AT3G29075 // AT4G29410 // AT3G27110 // AT4G16720 // AT4G18760 // AT3G22190 // AT1G53320 // AT1G64090 // AT4G33090 // AT5G21090 // AT1G33120 // AT5G14040 // AT5G52440 // AT1G50430 // AT2G17840 // AT1G10290 // AT1G59610 // AT1G18080 // AT2G41420 // AT2G05920 // AT5G65660 // AT1G10590 // AT2G21160 // AT3G59350 // AT5G27430 // AT1G13…
GO:1902494	C	catalytic complex	101	1709	711	28362	1.1e-13	2.4e-12	// AT5G20570 // AT1G75510 // AT3G08610 // AT5G66680 // AT1G08520 // AT3G58500 // AT2G33220 // AT3G10070 // AT2G46280 // AT2G32950 // AT2G47690 // AT3G06310 // AT3G01440 // AT5G52200 // AT2G47210 // AT1G54140 // AT2G01690 // AT2G28605 // AT3G46430 // AT1G75950 // AT1G21500 // AT4G02580 // AT1G51980 // AT1G09340 // AT1G77090 // AT1G78870 // AT3G57785 // AT1G74340 // AT5G40770 // AT3G05410 // AT1G67…
GO:0009506	C	plasmodesma	114	1709	899	28362	2.3e-12	5e-11	// AT3G11660 // AT4G29010 // AT5G07300 // AT3G59920 // AT3G55610 // AT2G31610 // AT1G14830 // AT3G52470 // AT5G02610 // AT5G66680 // AT5G12370 // AT3G15730 // AT4G22010 // AT5G58070 // AT3G53870 // AT5G14030 // AT4G29410 // AT3G05560 // AT4G17530 // AT5G57110 // AT1G64090 // AT5G25754 // AT3G08680 // AT1G02780 // AT1G09340 // AT1G33120 // AT5G02450 // AT1G10290 // AT3G63520 // AT1G59610 // AT2G05…
GO:0055044	C	symplast	114	1709	899	28362	2.3e-12	5e-11	// AT3G11660 // AT4G29010 // AT5G07300 // AT3G59920 // AT3G55610 // AT2G31610 // AT1G14830 // AT3G52470 // AT5G02610 // AT5G66680 // AT5G12370 // AT3G15730 // AT4G22010 // AT5G58070 // AT3G53870 // AT5G14030 // AT4G29410 // AT3G05560 // AT4G17530 // AT5G57110 // AT1G64090 // AT5G25754 // AT3G08680 // AT1G02780 // AT1G09340 // AT1G33120 // AT5G02450 // AT1G10290 // AT3G63520 // AT1G59610 // AT2G05…
GO:0005911	C	cell-cell junction	114	1709	901	28362	2.7e-12	5.5e-11	// AT3G11660 // AT4G29010 // AT5G07300 // AT3G59920 // AT3G55610 // AT2G31610 // AT1G14830 // AT3G52470 // AT5G02610 // AT5G66680 // AT5G12370 // AT3G15730 // AT4G22010 // AT5G58070 // AT3G53870 // AT5G14030 // AT4G29410 // AT3G05560 // AT4G17530 // AT5G57110 // AT1G64090 // AT5G25754 // AT3G08680 // AT1G02780 // AT1G09340 // AT1G33120 // AT5G02450 // AT1G10290 // AT3G63520 // AT1G59610 // AT2G05…
GO:0030054	C	cell junction	114	1709	901	28362	2.7e-12	5.5e-11	// AT3G11660 // AT4G29010 // AT5G07300 // AT3G59920 // AT3G55610 // AT2G31610 // AT1G14830 // AT3G52470 // AT5G02610 // AT5G66680 // AT5G12370 // AT3G15730 // AT4G22010 // AT5G58070 // AT3G53870 // AT5G14030 // AT4G29410 // AT3G05560 // AT4G17530 // AT5G57110 // AT1G64090 // AT5G25754 // AT3G08680 // AT1G02780 // AT1G09340 // AT1G33120 // AT5G02450 // AT1G10290 // AT3G63520 // AT1G59610 // AT2G05…
GO:0005783	C	endoplasmic reticulum	113	1709	895	28362	3.7e-12	7.7e-11	// AT2G32920 // AT3G13870 // AT1G76490 // AT4G32530 // AT2G25610 // AT5G66680 // AT2G15280 // AT5G43460 // AT5G59960 // AT3G15730 // AT1G33490 // AT2G31440 // AT5G58070 // AT5G14030 // AT3G62580 // AT4G30600 // AT3G06550 // AT3G24160 // AT2G45510 // AT4G17530 // AT3G16110 // AT1G64090 // AT5G10780 // AT1G74340 // AT3G57650 // AT1G08820 // AT4G30210 // AT4G33090 // AT3G13410 // AT5G39510 // AT3G52…
GO:0033176	C	proton-transporting V-type ATPase complex	17	1709	21	28362	5.7e-12	1.2e-10	// AT3G28715 // AT1G12840 // AT3G28710 // AT4G23710 // AT4G34720 // AT1G19910 // AT4G39080 // AT1G20260 // AT4G26710 // AT2G28520 // AT4G02620 // AT4G38510 // AT1G78900 // AT1G75630 // AT4G32530 // AT4G38920 // AT5G55290
GO:0016469	C	proton-transporting two-sector ATPase complex	24	1709	55	28362	6e-12	1.2e-10	// AT4G32260 // AT3G52300 // AT4G32530 // AT4G38920 // AT1G12840 // AT4G34720 // AT4G02620 // AT4G38510 // AT1G78900 // AT4G11150 // AT4G23710 // AT2G33040 // AT5G47030 // AT1G19910 // AT5G55290 // AT3G28715 // AT5G13450 // AT3G28710 // AT3G46430 // AT4G39080 // AT1G20260 // AT4G26710 // AT2G28520 // AT1G75630
GO:0005747	C	mitochondrial respiratory chain complex I	26	1709	69	28362	1.1e-11	2.2e-10	// AT1G67350 // AT5G47570 // AT4G00585 // AT3G08610 // AT5G08530 // AT2G33220 // AT2G42310 // AT5G52840 // AT5G67590 // AT3G17240 // AT4G34700 // AT3G12260 // AT5G63510 // AT2G47690 // AT3G06310 // AT5G18800 // AT2G20360 // AT1G76200 // AT3G18410 // AT4G02580 // AT1G49140 // AT5G47890 // AT3G57785 // AT3G62790 // AT5G40770 // AT1G79010
GO:0045271	C	respiratory chain complex I	26	1709	71	28362	1.9e-11	3.7e-10	// AT1G67350 // AT5G47570 // AT4G00585 // AT3G08610 // AT5G08530 // AT2G33220 // AT2G42310 // AT5G52840 // AT5G67590 // AT3G17240 // AT4G34700 // AT3G12260 // AT5G63510 // AT2G47690 // AT3G06310 // AT5G18800 // AT2G20360 // AT1G76200 // AT3G18410 // AT4G02580 // AT1G49140 // AT5G47890 // AT3G57785 // AT3G62790 // AT5G40770 // AT1G79010
GO:0030964	C	NADH dehydrogenase complex	26	1709	72	28362	2.5e-11	4.7e-10	// AT1G67350 // AT5G47570 // AT4G00585 // AT3G08610 // AT5G08530 // AT2G33220 // AT2G42310 // AT5G52840 // AT5G67590 // AT3G17240 // AT4G34700 // AT3G12260 // AT5G63510 // AT2G47690 // AT3G06310 // AT5G18800 // AT2G20360 // AT1G76200 // AT3G18410 // AT4G02580 // AT1G49140 // AT5G47890 // AT3G57785 // AT3G62790 // AT5G40770 // AT1G79010
GO:0005886	C	plasma membrane	325	1709	3735	28362	3.3e-11	6.3e-10	// AT3G11660 // AT2G32920 // AT3G60820 // AT3G23600 // AT3G08510 // AT5G05200 // AT5G35200 // AT5G48230 // AT4G02420 // AT5G07300 // AT4G35860 // AT1G20090 // AT3G63130 // AT1G35160 // AT3G13870 // AT3G51370 // AT3G63520 // AT1G70730 // AT1G14830 // AT3G52470 // AT1G31812 // AT2G41410 // AT5G02610 // AT5G58640 // AT1G34430 // AT2G04390 // AT2G33470 // AT5G12370 // AT3G15730 // AT2G43160 // AT2G31…
GO:0009528	C	plastid inner membrane	27	1709	82	28362	5.8e-11	1.1e-09	// AT5G16620 // AT3G51140 // AT4G31780 // AT5G64290 // AT1G42960 // AT5G12860 // AT4G13590 // AT3G61870 // AT1G78620 // AT1G44446 // AT5G42130 // AT1G04940 // AT2G32480 // AT2G20890 // AT5G13630 // AT4G30950 // AT1G06950 // AT2G24820 // AT3G18890 // AT3G63410 // AT1G65260 // AT5G12470 // AT2G15290 // AT1G29390 // AT5G33320 // AT4G00370 // AT1G05140
GO:0044425	C	membrane part	474	1709	5962	28362	1e-10	1.9e-09	// AT3G21865 // AT1G76490 // AT4G32530 // AT2G25610 // AT3G52470 // AT2G33220 // AT1G04940 // AT4G34700 // AT3G57090 // AT3G06550 // AT2G21190 // AT1G19910 // AT1G20510 // AT1G64090 // AT3G57650 // AT5G51010 // AT2G15290 // AT2G01690 // AT3G46430 // AT3G13410 // AT3G57785 // AT3G15160 // AT5G11150 // AT5G14040 // AT5G52440 // AT1G50430 // AT1G67350 // AT4G04470 // AT1G18080 // AT2G41420 // AT3G08…
GO:0009706	C	chloroplast inner membrane	25	1709	79	28362	5.9e-10	1.1e-08	// AT5G16620 // AT3G51140 // AT4G31780 // AT5G64290 // AT1G42960 // AT1G65260 // AT4G13590 // AT3G61870 // AT1G78620 // AT1G44446 // AT5G42130 // AT1G04940 // AT2G32480 // AT5G13630 // AT4G30950 // AT1G06950 // AT2G24820 // AT3G18890 // AT3G63410 // AT5G12860 // AT5G12470 // AT2G15290 // AT1G29390 // AT4G00370 // AT1G05140
GO:0015934	C	large ribosomal subunit	38	1709	181	28362	7.3e-10	1.3e-08	// AT4G36130 // AT5G48760 // AT1G09690 // AT5G22440 // AT2G27530 // AT3G06320 // AT1G32990 // AT5G02610 // AT1G14320 // AT3G53740 // AT2G36620 // AT3G55750 // AT4G26230 // AT4G29410 // AT1G74270 // AT1G07070 // AT4G31985 // AT4G16720 // AT3G27830 // AT1G08360 // AT3G05560 // AT3G27850 // AT3G53430 // AT3G55170 // AT1G66580 // AT2G24090 // AT1G33140 // AT1G02780 // AT3G04400 // AT3G28900 // AT1G33…
GO:0022625	C	cytosolic large ribosomal subunit	31	1709	134	28362	3.7e-09	6.6e-08	// AT4G36130 // AT5G48760 // AT1G09690 // AT5G22440 // AT2G27530 // AT3G16080 // AT1G32990 // AT5G02610 // AT1G14320 // AT3G53740 // AT2G36620 // AT1G08360 // AT4G26230 // AT4G29410 // AT1G74270 // AT1G07070 // AT4G31985 // AT4G16720 // AT3G55750 // AT3G05560 // AT3G53430 // AT3G55170 // AT1G66580 // AT4G15000 // AT1G33140 // AT1G02780 // AT3G04400 // AT3G28900 // AT3G14600 // AT1G77940 // AT5G02…
GO:0010319	C	stromule	17	1709	37	28362	3.9e-09	6.9e-08	// AT4G31990 // AT3G25770 // AT3G12780 // AT1G03680 // AT1G16880 // AT2G35040 // AT1G32060 // AT1G09340 // AT1G26340 // AT2G47730 // AT1G23190 // AT1G70730 // AT3G54050 // AT3G11630 // AT2G37220 // AT2G20890 // AT5G06290
GO:0031974	C	membrane-enclosed lumen	112	1709	1008	28362	4.2e-09	7.1e-08	// AT2G32920 // AT3G62530 // AT1G75510 // AT4G29390 // AT3G55460 // AT2G31955 // AT2G20860 // AT1G52740 // AT5G66680 // AT3G58500 // AT2G04390 // AT3G10070 // AT3G16110 // AT2G32950 // AT2G47580 // AT5G52470 // AT3G45300 // AT5G65260 // AT2G33040 // AT1G17440 // AT3G05560 // AT2G47690 // AT3G06310 // AT5G50850 // AT1G48620 // AT1G64090 // AT5G19820 // AT2G47210 // AT1G54140 // AT1G02780 // AT5G18…
GO:0070013	C	intracellular organelle lumen	112	1709	1008	28362	4.2e-09	7.1e-08	// AT2G32920 // AT3G62530 // AT1G75510 // AT4G29390 // AT3G55460 // AT2G31955 // AT2G20860 // AT1G52740 // AT5G66680 // AT3G58500 // AT2G04390 // AT3G10070 // AT3G16110 // AT2G32950 // AT2G47580 // AT5G52470 // AT3G45300 // AT5G65260 // AT2G33040 // AT1G17440 // AT3G05560 // AT2G47690 // AT3G06310 // AT5G50850 // AT1G48620 // AT1G64090 // AT5G19820 // AT2G47210 // AT1G54140 // AT1G02780 // AT5G18…
GO:0043233	C	organelle lumen	112	1709	1008	28362	4.2e-09	7.1e-08	// AT2G32920 // AT3G62530 // AT1G75510 // AT4G29390 // AT3G55460 // AT2G31955 // AT2G20860 // AT1G52740 // AT5G66680 // AT3G58500 // AT2G04390 // AT3G10070 // AT3G16110 // AT2G32950 // AT2G47580 // AT5G52470 // AT3G45300 // AT5G65260 // AT2G33040 // AT1G17440 // AT3G05560 // AT2G47690 // AT3G06310 // AT5G50850 // AT1G48620 // AT1G64090 // AT5G19820 // AT2G47210 // AT1G54140 // AT1G02780 // AT5G18…
GO:0033179	C	proton-transporting V-type ATPase, V0 domain	11	1709	12	28362	1.4e-08	2.3e-07	// AT3G28715 // AT3G28710 // AT4G34720 // AT1G19910 // AT4G39080 // AT4G26710 // AT2G28520 // AT5G55290 // AT1G75630 // AT4G32530 // AT4G38920
GO:0030135	C	coated vesicle	25	1709	98	28362	2.3e-08	3.8e-07	// AT1G10290 // AT5G35200 // AT1G59610 // AT3G08530 // AT1G21900 // AT2G20760 // AT3G44340 // AT3G07680 // AT1G60070 // AT3G15730 // AT1G60780 // AT3G17440 // AT2G40060 // AT4G08520 // AT5G11490 // AT5G16830 // AT1G26670 // AT2G43160 // AT2G14720 // AT5G13300 // AT5G39510 // AT2G28520 // AT4G14160 // AT4G11380 // AT5G42080
GO:0031410	C	cytoplasmic vesicle	35	1709	182	28362	2.4e-08	3.9e-07	// AT1G10290 // AT5G35200 // AT1G59610 // AT3G15580 // AT3G08530 // AT1G21900 // AT2G20760 // AT3G07680 // AT3G44340 // AT5G16830 // AT1G60070 // AT3G15730 // AT1G60780 // AT4G08520 // AT3G17440 // AT2G40060 // AT5G20350 // AT4G11380 // AT5G11490 // AT2G47170 // AT1G26670 // AT2G43160 // AT2G14720 // AT2G45170 // AT1G01650 // AT5G13300 // AT1G62040 // AT4G19640 // AT2G43070 // AT5G39510 // AT3G52…
GO:0097708	C	intracellular vesicle	35	1709	183	28362	2.7e-08	4.4e-07	// AT1G10290 // AT5G35200 // AT1G59610 // AT3G15580 // AT3G08530 // AT1G21900 // AT2G20760 // AT3G07680 // AT3G44340 // AT5G16830 // AT1G60070 // AT3G15730 // AT1G60780 // AT4G08520 // AT3G17440 // AT2G40060 // AT5G20350 // AT4G11380 // AT5G11490 // AT2G47170 // AT1G26670 // AT2G43160 // AT2G14720 // AT2G45170 // AT1G01650 // AT5G13300 // AT1G62040 // AT4G19640 // AT2G43070 // AT5G39510 // AT3G52…
GO:0016023	C	cytoplasmic, membrane-bounded vesicle	31	1709	151	28362	4.1e-08	6.6e-07	// AT1G10290 // AT5G35200 // AT1G59610 // AT3G08530 // AT1G21900 // AT2G20760 // AT3G44340 // AT3G07680 // AT5G16830 // AT1G60070 // AT3G15730 // AT1G60780 // AT4G08520 // AT3G17440 // AT2G40060 // AT5G20350 // AT5G11490 // AT2G47170 // AT1G26670 // AT2G43160 // AT2G14720 // AT1G01650 // AT5G13300 // AT4G19640 // AT2G43070 // AT5G39510 // AT3G52640 // AT2G28520 // AT4G14160 // AT4G11380 // AT5G42…
GO:0033177	C	proton-transporting two-sector ATPase complex, proton-transporting domain	13	1709	23	28362	4.2e-08	6.7e-07	// AT3G28715 // AT3G28710 // AT4G32260 // AT4G34720 // AT1G19910 // AT4G39080 // AT4G26710 // AT2G28520 // AT5G55290 // AT3G52300 // AT1G75630 // AT4G32530 // AT4G38920
GO:0005730	C	nucleolus	55	1709	390	28362	5.6e-08	8.9e-07	// AT1G02780 // AT3G62530 // AT5G11170 // AT5G22440 // AT5G10010 // AT3G44750 // AT1G20090 // AT4G38680 // AT3G02090 // AT3G52300 // AT1G11475 // AT2G18510 // AT1G04510 // AT2G33040 // AT5G66680 // AT1G14320 // AT3G58500 // AT2G04390 // AT2G19520 // AT3G06860 // AT4G25630 // AT2G23080 // AT2G47580 // AT3G03920 // AT5G52470 // AT1G26880 // AT3G11500 // AT4G01560 // AT3G05560 // AT3G09200 // AT4G29…
GO:0031988	C	membrane-bounded vesicle	31	1709	155	28362	6.8e-08	1.1e-06	// AT1G10290 // AT5G35200 // AT1G59610 // AT3G08530 // AT1G21900 // AT2G20760 // AT3G44340 // AT3G07680 // AT5G16830 // AT1G60070 // AT3G15730 // AT1G60780 // AT4G08520 // AT3G17440 // AT2G40060 // AT5G20350 // AT5G11490 // AT2G47170 // AT1G26670 // AT2G43160 // AT2G14720 // AT1G01650 // AT5G13300 // AT4G19640 // AT2G43070 // AT5G39510 // AT3G52640 // AT2G28520 // AT4G14160 // AT4G11380 // AT5G42…
GO:0031982	C	vesicle	35	1709	194	28362	9.4e-08	1.5e-06	// AT1G10290 // AT5G35200 // AT1G59610 // AT3G15580 // AT3G08530 // AT1G21900 // AT2G20760 // AT3G07680 // AT3G44340 // AT5G16830 // AT1G60070 // AT3G15730 // AT1G60780 // AT4G08520 // AT3G17440 // AT2G40060 // AT5G20350 // AT4G11380 // AT5G11490 // AT2G47170 // AT1G26670 // AT2G43160 // AT2G14720 // AT2G45170 // AT1G01650 // AT5G13300 // AT1G62040 // AT4G19640 // AT2G43070 // AT5G39510 // AT3G52…
GO:0005758	C	mitochondrial intermembrane space	12	1709	22	28362	1.9e-07	2.9e-06	// AT5G20080 // AT4G11010 // AT4G32060 // AT2G47690 // AT3G06310 // AT2G29530 // AT5G18400 // AT5G50810 // AT3G02090 // AT1G22840 // AT5G18800 // AT3G62790
GO:0044432	C	endoplasmic reticulum part	58	1709	440	28362	1.9e-07	2.9e-06	// AT1G50430 // AT2G32920 // AT3G13870 // AT5G47200 // AT1G76490 // AT1G80860 // AT1G21900 // AT2G46170 // AT3G60600 // AT1G67730 // AT4G32530 // AT3G44340 // AT2G25610 // AT2G29390 // AT4G34640 // AT1G27320 // AT2G15280 // AT2G21160 // AT1G02130 // AT1G11890 // AT1G54990 // AT1G71220 // AT3G04090 // AT5G66680 // AT3G25040 // AT5G48810 // AT5G14030 // AT3G17440 // AT2G32720 // AT5G60640 // AT3G06…
GO:0042175	C	nuclear outer membrane-endoplasmic reticulum membrane network	54	1709	404	28362	3.4e-07	5.2e-06	// AT1G50430 // AT3G13870 // AT5G47200 // AT1G76490 // AT1G80860 // AT1G21900 // AT2G46170 // AT3G60600 // AT1G67730 // AT4G32530 // AT3G44340 // AT2G25610 // AT2G29390 // AT1G27320 // AT2G15280 // AT2G21160 // AT1G02130 // AT1G11890 // AT1G54990 // AT4G34640 // AT3G04090 // AT5G66680 // AT3G25040 // AT5G48810 // AT5G14030 // AT3G17440 // AT2G32720 // AT4G30600 // AT3G06550 // AT4G21150 // AT1G07…
GO:0042579	C	microbody	39	1709	247	28362	3.9e-07	5.8e-06	// AT3G48170 // AT3G01910 // AT3G21865 // AT5G48230 // AT4G04470 // AT5G19750 // AT2G31670 // AT5G11520 // AT5G47040 // AT5G43940 // AT3G14415 // AT5G36880 // AT2G33150 // AT3G12800 // AT4G29010 // AT1G04290 // AT3G06860 // AT3G51840 // AT3G14150 // AT2G38700 // AT3G61070 // AT1G20630 // AT3G57090 // AT4G27820 // AT3G48140 // AT4G04320 // AT5G18100 // AT4G39850 // AT2G45740 // AT2G43020 // AT5G24…
GO:0005777	C	peroxisome	39	1709	247	28362	3.9e-07	5.8e-06	// AT3G48170 // AT3G01910 // AT3G21865 // AT5G48230 // AT4G04470 // AT5G19750 // AT2G31670 // AT5G11520 // AT5G47040 // AT5G43940 // AT3G14415 // AT5G36880 // AT2G33150 // AT3G12800 // AT4G29010 // AT1G04290 // AT3G06860 // AT3G51840 // AT3G14150 // AT2G38700 // AT3G61070 // AT1G20630 // AT3G57090 // AT4G27820 // AT3G48140 // AT4G04320 // AT5G18100 // AT4G39850 // AT2G45740 // AT2G43020 // AT5G24…
GO:0030136	C	clathrin-coated vesicle	19	1709	69	28362	4.1e-07	5.9e-06	// AT5G42080 // AT2G14720 // AT1G10290 // AT5G35200 // AT1G59610 // AT2G40060 // AT4G08520 // AT5G13300 // AT3G08530 // AT5G39510 // AT2G28520 // AT2G20760 // AT3G15730 // AT1G60780 // AT4G11380 // AT5G11490 // AT5G16830 // AT2G43160 // AT1G60070
GO:0005789	C	endoplasmic reticulum membrane	53	1709	399	28362	5.2e-07	7.6e-06	// AT1G50430 // AT3G13870 // AT5G47200 // AT1G76490 // AT1G80860 // AT1G21900 // AT2G46170 // AT3G60600 // AT1G67730 // AT4G32530 // AT3G44340 // AT2G25610 // AT2G29390 // AT1G27320 // AT2G15280 // AT2G21160 // AT1G02130 // AT1G11890 // AT1G54990 // AT4G34640 // AT3G04090 // AT5G66680 // AT3G25040 // AT5G48810 // AT5G14030 // AT3G17440 // AT2G32720 // AT4G30600 // AT3G06550 // AT4G21150 // AT1G07…
GO:0031970	C	organelle envelope lumen	12	1709	25	28362	5.3e-07	7.7e-06	// AT5G20080 // AT4G11010 // AT4G32060 // AT2G47690 // AT3G06310 // AT2G29530 // AT5G18400 // AT5G50810 // AT3G02090 // AT1G22840 // AT5G18800 // AT3G62790
GO:0022627	C	cytosolic small ribosomal subunit	23	1709	108	28362	1.3e-06	1.8e-05	// AT5G10360 // AT4G29390 // AT3G04840 // AT5G35530 // AT2G31610 // AT3G49080 // AT1G15930 // AT1G74970 // AT2G04390 // AT1G72370 // AT3G53870 // AT5G03850 // AT3G44010 // AT5G59850 // AT2G21580 // AT3G60770 // AT1G34030 // AT2G05220 // AT2G41840 // AT2G37270 // AT3G48930 // AT1G48830 // AT5G61170
GO:0030312	C	external encapsulating structure	76	1709	706	28362	3.8e-06	5.4e-05	// AT3G52960 // AT5G19770 // AT5G20080 // AT4G29010 // AT5G55730 // AT2G05920 // AT2G27680 // AT5G03850 // AT2G01720 // AT3G02090 // AT5G14040 // AT1G28290 // AT3G55260 // AT5G42980 // AT5G16050 // AT3G58610 // AT1G12000 // AT5G66680 // AT4G18670 // AT3G12780 // AT5G27430 // AT2G33340 // AT3G44100 // AT3G06860 // AT2G22230 // AT4G22010 // AT5G65430 // AT1G74920 // AT1G78900 // AT4G20830 // AT2G45…
GO:0005618	C	cell wall	76	1709	706	28362	3.8e-06	5.4e-05	// AT3G52960 // AT5G19770 // AT5G20080 // AT4G29010 // AT5G55730 // AT2G05920 // AT2G27680 // AT5G03850 // AT2G01720 // AT3G02090 // AT5G14040 // AT1G28290 // AT3G55260 // AT5G42980 // AT5G16050 // AT3G58610 // AT1G12000 // AT5G66680 // AT4G18670 // AT3G12780 // AT5G27430 // AT2G33340 // AT3G44100 // AT3G06860 // AT2G22230 // AT4G22010 // AT5G65430 // AT1G74920 // AT1G78900 // AT4G20830 // AT2G45…
GO:0016471	C	vacuolar proton-transporting V-type ATPase complex	8	1709	11	28362	4.6e-06	6.4e-05	// AT1G12840 // AT4G34720 // AT1G19910 // AT4G39080 // AT2G28520 // AT4G23710 // AT1G75630 // AT4G38920
GO:0015935	C	small ribosomal subunit	25	1709	140	28362	7.2e-06	9.9e-05	// AT5G10360 // AT4G29390 // AT3G04840 // AT5G35530 // AT2G31610 // AT3G49080 // AT1G15930 // AT1G74970 // AT2G04390 // AT1G72370 // AT3G53870 // AT5G03850 // AT3G44010 // AT5G14320 // AT5G59850 // AT2G21580 // AT2G33800 // AT3G60770 // AT1G34030 // AT2G05220 // AT2G41840 // AT2G37270 // AT3G48930 // AT1G48830 // AT5G61170
GO:0030662	C	coated vesicle membrane	15	1709	58	28362	1.3e-05	0.00017	// AT2G14720 // AT1G60780 // AT1G60070 // AT2G40060 // AT4G08520 // AT3G08530 // AT2G28520 // AT4G14160 // AT2G20760 // AT5G39510 // AT5G11490 // AT4G11380 // AT3G44340 // AT1G26670 // AT3G17440
GO:0005798	C	Golgi-associated vesicle	12	1709	39	28362	2.2e-05	0.00029	// AT1G01650 // AT5G13300 // AT2G40060 // AT4G08520 // AT2G43070 // AT5G39510 // AT3G52640 // AT2G28520 // AT2G20760 // AT3G08530 // AT2G47170 // AT5G16830
GO:0005770	C	late endosome	18	1709	86	28362	2.2e-05	0.00029	// AT2G06530 // AT2G14720 // AT1G20110 // AT2G27600 // AT4G19640 // AT4G32150 // AT4G29380 // AT5G39510 // AT1G75850 // AT5G20650 // AT3G47810 // AT5G04920 // AT5G67560 // AT3G49870 // AT1G26670 // AT5G11150 // AT5G16830 // AT3G17440
GO:0048046	C	apoplast	55	1709	486	28362	2.4e-05	0.00031	// AT4G23170 // AT3G60820 // AT3G23600 // AT5G19770 // AT3G12780 // AT1G53310 // AT3G59920 // AT5G58330 // AT4G31990 // AT2G21330 // AT5G49910 // AT3G19170 // AT3G56310 // AT3G14415 // AT3G58610 // AT1G04410 // AT1G08200 // AT1G03680 // AT5G67070 // AT1G47710 // AT5G14740 // AT2G28000 // AT1G78900 // AT3G17240 // AT2G45470 // AT3G11630 // AT2G41530 // AT4G09000 // AT3G48990 // AT3G14067 // AT3G09…
GO:0010287	C	plastoglobule	17	1709	80	28362	3.1e-05	0.0004	// AT1G51110 // AT3G10130 // AT4G01150 // AT5G05200 // AT1G79600 // AT5G17230 // AT1G31330 // AT1G09340 // AT3G23400 // AT1G78140 // AT2G21330 // AT2G42130 // AT1G45474 // AT3G26060 // AT4G19170 // AT4G31390 // AT1G52590
GO:0030133	C	transport vesicle	13	1709	49	28362	3.7e-05	0.00049	// AT5G13300 // AT2G40060 // AT3G08530 // AT1G21900 // AT2G28520 // AT4G14160 // AT2G20760 // AT5G39510 // AT3G07680 // AT3G44340 // AT5G16830 // AT1G26670 // AT3G17440
GO:0000220	C	vacuolar proton-transporting V-type ATPase, V0 domain	6	1709	7	28362	4.1e-05	0.00052	// AT4G34720 // AT1G19910 // AT4G39080 // AT2G28520 // AT1G75630 // AT4G38920
GO:0044428	C	nuclear part	100	1709	1078	28362	4.1e-05	0.00052	// AT3G62530 // AT2G43810 // AT1G75510 // AT4G29390 // AT3G63130 // AT3G55460 // AT1G52740 // AT5G66680 // AT3G58500 // AT2G04390 // AT3G10070 // AT2G32950 // AT1G80070 // AT2G47580 // AT5G52470 // AT5G03740 // AT5G65260 // AT2G33040 // AT1G17440 // AT3G05560 // AT5G50850 // AT5G19820 // AT2G47210 // AT1G54140 // AT1G02780 // AT2G40730 // AT1G02140 // AT3G56900 // AT1G33120 // AT3G05060 // AT4G12…
GO:0044433	C	cytoplasmic vesicle part	18	1709	91	28362	4.2e-05	0.00053	// AT2G14720 // AT1G01650 // AT1G60070 // AT2G40060 // AT5G20350 // AT2G43070 // AT1G60780 // AT3G08530 // AT2G28520 // AT4G14160 // AT2G20760 // AT5G39510 // AT5G11490 // AT4G11380 // AT3G44340 // AT1G26670 // AT4G08520 // AT3G17440
GO:0033178	C	proton-transporting two-sector ATPase complex, catalytic domain	9	1709	23	28362	5.2e-05	0.00065	// AT2G33040 // AT1G12840 // AT5G13450 // AT5G47030 // AT1G20260 // AT4G02620 // AT4G38510 // AT1G78900 // AT4G11150
GO:0005768	C	endosome	47	1709	405	28362	5.2e-05	0.00065	// AT3G13772 // AT4G35860 // AT1G04750 // AT4G39840 // AT3G20290 // AT2G44610 // AT3G49870 // AT5G16830 // AT5G06700 // AT2G06530 // AT1G20110 // AT2G27600 // AT4G32410 // AT1G43130 // AT3G47810 // AT5G65810 // AT1G31130 // AT3G17440 // AT5G49720 // AT5G05190 // AT1G64650 // AT1G60780 // AT5G20350 // AT4G29380 // AT4G12290 // AT5G42090 // AT5G67560 // AT2G47170 // AT1G26670 // AT2G33120 // AT4G19…
GO:0031201	C	SNARE complex	13	1709	53	28362	7.5e-05	0.00093	// AT4G20410 // AT4G32150 // AT5G39510 // AT3G56190 // AT1G04750 // AT1G11890 // AT5G58060 // AT2G33120 // AT3G09740 // AT5G16830 // AT1G26670 // AT5G11150 // AT3G17440
GO:0030665	C	clathrin-coated vesicle membrane	10	1709	31	28362	7.6e-05	0.00093	// AT2G14720 // AT1G60070 // AT2G40060 // AT4G08520 // AT3G08530 // AT2G28520 // AT2G20760 // AT1G60780 // AT4G11380 // AT5G11490
GO:0045275	C	respiratory chain complex III	8	1709	19	28362	9e-05	0.0011	// AT5G13440 // AT1G15120 // AT3G46430 // AT1G51980 // AT5G13430 // AT3G02090 // AT5G40810 // AT3G27240
GO:0005750	C	mitochondrial respiratory chain complex III	8	1709	19	28362	9e-05	0.0011	// AT5G13440 // AT1G15120 // AT3G46430 // AT1G51980 // AT5G13430 // AT3G02090 // AT5G40810 // AT3G27240
GO:0031981	C	nuclear lumen	79	1709	824	28362	9.9e-05	0.0012	// AT1G02780 // AT3G62530 // AT5G11170 // AT1G75510 // AT1G17440 // AT5G10010 // AT3G44750 // AT1G20090 // AT4G38680 // AT4G02570 // AT3G02090 // AT3G06860 // AT3G52300 // AT4G35800 // AT1G11475 // AT4G29390 // AT2G18510 // AT1G04510 // AT1G70060 // AT1G52740 // AT5G66240 // AT1G14320 // AT3G52090 // AT2G04390 // AT5G19820 // AT2G19520 // AT3G58500 // AT3G13530 // AT3G10070 // AT4G25630 // AT2G32…
GO:0030659	C	cytoplasmic vesicle membrane	16	1709	81	28362	0.00011	0.0013	// AT2G14720 // AT1G60780 // AT1G60070 // AT2G40060 // AT5G20350 // AT3G08530 // AT2G28520 // AT4G14160 // AT2G20760 // AT5G39510 // AT5G11490 // AT4G11380 // AT3G44340 // AT1G26670 // AT4G08520 // AT3G17440
GO:0030118	C	clathrin coat	9	1709	26	28362	0.00011	0.0013	// AT1G60070 // AT2G40060 // AT4G08520 // AT3G08530 // AT5G22780 // AT2G20760 // AT1G60780 // AT4G11380 // AT5G11490
GO:0031902	C	late endosome membrane	14	1709	64	28362	0.00012	0.0014	// AT2G14720 // AT1G20110 // AT2G27600 // AT4G19640 // AT4G32150 // AT5G39510 // AT1G75850 // AT3G47810 // AT5G67560 // AT3G49870 // AT1G26670 // AT5G11150 // AT5G16830 // AT3G17440
GO:0030117	C	membrane coat	12	1709	48	28362	0.00012	0.0014	// AT1G60780 // AT1G60070 // AT2G40060 // AT4G08520 // AT3G08530 // AT5G22780 // AT2G20760 // AT5G11490 // AT4G11380 // AT3G44340 // AT3G15160 // AT4G14160
GO:0048475	C	coated membrane	12	1709	48	28362	0.00012	0.0014	// AT1G60780 // AT1G60070 // AT2G40060 // AT4G08520 // AT3G08530 // AT5G22780 // AT2G20760 // AT5G11490 // AT4G11380 // AT3G44340 // AT3G15160 // AT4G14160
GO:0012506	C	vesicle membrane	16	1709	82	28362	0.00013	0.0014	// AT2G14720 // AT1G60780 // AT1G60070 // AT2G40060 // AT5G20350 // AT3G08530 // AT2G28520 // AT4G14160 // AT2G20760 // AT5G39510 // AT5G11490 // AT4G11380 // AT3G44340 // AT1G26670 // AT4G08520 // AT3G17440
GO:0030140	C	trans-Golgi network transport vesicle	7	1709	15	28362	0.00015	0.0017	// AT5G13300 // AT2G40060 // AT5G39510 // AT2G28520 // AT2G20760 // AT3G08530 // AT5G16830
GO:0010008	C	endosome membrane	24	1709	165	28362	0.00019	0.0022	// AT3G13772 // AT1G04750 // AT3G49870 // AT1G20110 // AT2G27600 // AT2G43070 // AT3G47810 // AT3G17440 // AT2G06530 // AT1G60780 // AT5G67560 // AT5G16830 // AT1G26670 // AT2G33120 // AT5G52240 // AT2G14720 // AT1G01650 // AT4G19640 // AT4G32150 // AT5G39510 // AT1G75850 // AT5G04920 // AT5G11150 // AT3G20290
GO:0033180	C	proton-transporting V-type ATPase, V1 domain	5	1709	6	28362	0.0002	0.0023	// AT4G02620 // AT4G38510 // AT1G12840 // AT1G78900 // AT1G20260
GO:0044440	C	endosomal part	24	1709	168	28362	0.00025	0.0028	// AT3G13772 // AT1G04750 // AT3G49870 // AT1G20110 // AT2G27600 // AT2G43070 // AT3G47810 // AT3G17440 // AT2G06530 // AT1G60780 // AT5G67560 // AT5G16830 // AT1G26670 // AT2G33120 // AT5G52240 // AT2G14720 // AT1G01650 // AT4G19640 // AT4G32150 // AT5G39510 // AT1G75850 // AT5G04920 // AT5G11150 // AT3G20290
GO:0008250	C	oligosaccharyltransferase complex	5	1709	7	28362	0.00033	0.0037	// AT1G32210 // AT1G61790 // AT5G66680 // AT1G34130 // AT4G21150
GO:0030658	C	transport vesicle membrane	9	1709	33	28362	0.00049	0.0054	// AT2G40060 // AT3G08530 // AT2G28520 // AT4G14160 // AT2G20760 // AT5G39510 // AT3G44340 // AT1G26670 // AT3G17440
GO:0009504	C	cell plate	9	1709	33	28362	0.00049	0.0054	// AT5G49720 // AT1G14830 // AT1G59610 // AT2G40060 // AT1G04750 // AT3G63130 // AT1G64090 // AT5G42080 // AT2G33120
GO:1902495	C	transmembrane transporter complex	9	1709	34	28362	0.00059	0.0064	// AT5G13440 // AT1G15120 // AT3G46430 // AT1G51980 // AT5G13430 // AT3G02090 // AT5G49890 // AT5G40810 // AT3G27240
GO:0019867	C	outer membrane	17	1709	107	28362	0.00066	0.0071	// AT1G49410 // AT3G57090 // AT1G26340 // AT5G41685 // AT4G02510 // AT1G47200 // AT5G43970 // AT5G27540 // AT5G40930 // AT4G29130 // AT3G02090 // AT1G24267 // AT5G05520 // AT5G51020 // AT4G35450 // AT3G52230 // AT2G20890
GO:0044431	C	Golgi apparatus part	55	1709	567	28362	0.00083	0.0089	// AT3G13772 // AT3G13870 // AT1G10290 // AT5G47200 // AT3G63420 // AT5G49720 // AT3G08530 // AT4G39840 // AT2G20760 // AT3G44340 // AT4G32530 // AT3G07680 // AT5G03520 // AT2G25610 // AT5G16830 // AT5G47780 // AT3G25040 // AT1G02130 // AT4G32410 // AT3G52640 // AT1G43130 // AT1G11890 // AT1G31130 // AT5G65810 // AT5G62220 // AT5G42090 // AT4G08520 // AT1G71980 // AT3G06550 // AT5G06700 // AT1G64…

## Sheet: Col-0 vs F1CL DMG
GO_acc	term_type	Term	queryitem	querytotal	bgitem	bgtotal	pvalue	FDR	entries	col_ler
GO:0044281	P	small molecule metabolic process	115	303	4065	28397	6.1e-24	5.9e-21	// AT3G54660 // AT2G22230 // AT1G75690 // AT1G76490 // AT3G47520 // AT3G51820 // AT5G08050 // AT4G24620 // AT2G20860 // AT4G00895 // AT1G18500 // AT5G50250 // AT2G43090 // AT1G61740 // AT5G62220 // AT4G20360 // AT1G07110 // AT3G07430 // AT2G43800 // AT2G02390 // AT1G14345 // AT1G66970 // AT4G12730 // AT1G20696 // AT3G08680 // AT2G47590 // AT2G05710 // AT1G20340 // AT3G56900 // AT5G46290 // AT1G56…	Exist
GO:0006091	P	generation of precursor metabolites and energy	49	303	730	28397	6.6e-24	5.9e-21	// AT2G30570 // AT4G32260 // AT1G75690 // AT3G27925 // AT5G11770 // AT3G22890 // AT5G58330 // AT4G38680 // AT4G09010 // AT1G05140 // AT5G08050 // AT4G24620 // AT2G37220 // AT3G58610 // AT4G00895 // AT5G27470 // AT2G43090 // AT5G50250 // AT2G46505 // AT5G14740 // AT3G17210 // AT5G42270 // AT1G54780 // AT1G14345 // AT3G55800 // AT1G55670 // AT2G32480 // AT1G66430 // AT1G76100 // AT1G75460 // AT5G47…	Exist
GO:0006066	P	alcohol metabolic process	60	303	1143	28397	5.3e-24	5.9e-21	// AT4G32260 // AT1G75690 // AT1G76490 // AT3G27925 // AT3G22890 // AT3G51820 // AT5G62350 // AT5G18660 // AT1G22850 // AT1G68590 // AT5G08050 // AT1G67730 // AT3G53130 // AT4G24620 // AT3G58610 // AT2G20860 // AT1G32990 // AT5G43750 // AT5G27470 // AT3G63460 // AT2G43090 // AT5G50250 // AT2G46505 // AT5G42270 // AT1G54780 // AT1G14345 // AT3G55800 // AT2G24090 // AT1G07110 // AT5G06600 // AT1G66…	NA
GO:0044262	P	cellular carbohydrate metabolic process	75	303	1778	28397	1.6e-24	5.9e-21	// AT3G58990 // AT3G51510 // AT4G27520 // AT2G22230 // AT1G75690 // AT3G27925 // AT3G47520 // AT3G22890 // AT3G51820 // AT5G58330 // AT5G62350 // AT5G18660 // AT1G22850 // AT1G68590 // AT5G11770 // AT5G08050 // AT3G53130 // AT4G24620 // AT2G43090 // AT3G58610 // AT5G05200 // AT2G35960 // AT1G32990 // AT2G46505 // AT5G43750 // AT5G27470 // AT3G63460 // AT2G20860 // AT2G18960 // AT3G15520 // AT5G50…	NA
GO:0005996	P	monosaccharide metabolic process	51	303	804	28397	7.9e-24	5.9e-21	// AT4G32260 // AT1G75690 // AT3G27925 // AT3G22890 // AT3G51820 // AT5G62350 // AT5G18660 // AT4G09010 // AT1G68590 // AT5G08050 // AT3G53130 // AT1G32990 // AT3G58610 // AT3G63460 // AT4G24620 // AT5G43750 // AT5G27470 // AT2G20860 // AT2G43090 // AT5G50250 // AT2G46505 // AT5G42270 // AT1G54780 // AT1G14345 // AT3G55800 // AT2G24090 // AT1G07110 // AT5G06600 // AT1G66430 // AT1G01080 // AT1G74…	NA
GO:0005975	P	carbohydrate metabolic process	81	303	2249	28397	2.6e-22	1.6e-19	// AT3G58990 // AT3G51510 // AT5G05200 // AT2G22230 // AT1G75690 // AT3G27925 // AT3G47520 // AT3G22890 // AT3G51820 // AT5G58330 // AT5G62350 // AT5G18660 // AT1G22850 // AT1G68590 // AT5G11770 // AT5G08050 // AT3G53130 // AT4G24620 // AT3G54920 // AT2G43090 // AT3G58610 // AT2G20860 // AT2G35960 // AT1G32990 // AT2G46505 // AT5G43750 // AT5G27470 // AT3G63460 // AT2G18960 // AT3G15520 // AT5G50…	NA
GO:0042180	P	cellular ketone metabolic process	78	303	2123	28397	6e-22	3.2e-19	// AT3G58990 // AT5G45390 // AT2G22230 // AT1G76100 // AT1G31330 // AT5G64290 // AT3G47520 // AT3G22890 // AT3G51820 // AT1G17290 // AT2G31670 // AT5G18660 // AT5G19240 // AT2G23810 // AT1G68590 // AT1G67730 // AT3G53130 // AT4G24620 // AT4G25130 // AT2G37220 // AT3G58610 // AT2G20860 // AT4G35630 // AT1G32990 // AT2G26540 // AT5G43750 // AT5G27470 // AT1G18500 // AT2G43090 // AT5G50250 // AT4G32…	NA
GO:0043436	P	oxoacid metabolic process	77	303	2103	28397	1.5e-21	5.2e-19	// AT3G58990 // AT5G45390 // AT2G22230 // AT1G76100 // AT1G31330 // AT5G64290 // AT3G47520 // AT3G22890 // AT3G51820 // AT1G17290 // AT2G31670 // AT5G18660 // AT2G23810 // AT1G68590 // AT1G67730 // AT3G53130 // AT4G24620 // AT4G25130 // AT2G37220 // AT3G58610 // AT2G20860 // AT4G35630 // AT1G32990 // AT2G26540 // AT5G43750 // AT5G27470 // AT1G18500 // AT2G43090 // AT5G50250 // AT4G32260 // AT5G14…	Exist
GO:0006082	P	organic acid metabolic process	77	303	2105	28397	1.5e-21	5.2e-19	// AT3G58990 // AT5G45390 // AT2G22230 // AT1G76100 // AT1G31330 // AT5G64290 // AT3G47520 // AT3G22890 // AT3G51820 // AT1G17290 // AT2G31670 // AT5G18660 // AT2G23810 // AT1G68590 // AT1G67730 // AT3G53130 // AT4G24620 // AT4G25130 // AT2G37220 // AT3G58610 // AT2G20860 // AT4G35630 // AT1G32990 // AT2G26540 // AT5G43750 // AT5G27470 // AT1G18500 // AT2G43090 // AT5G50250 // AT4G32260 // AT5G14…	Exist
GO:0034641	P	cellular nitrogen compound metabolic process	62	303	1373	28397	1.4e-21	5.2e-19	// AT3G58990 // AT5G05200 // AT2G22230 // AT1G75690 // AT1G31330 // AT5G64290 // AT3G22890 // AT3G51820 // AT1G17290 // AT2G31670 // AT5G18660 // AT2G23810 // AT3G26060 // AT5G08050 // AT3G53130 // AT1G32990 // AT4G25130 // AT3G58610 // AT2G20860 // AT4G35630 // AT3G54640 // AT2G26540 // AT5G27470 // AT1G18500 // AT2G43090 // AT5G50250 // AT4G32260 // AT3G48560 // AT5G42270 // AT3G14067 // AT2G25…	NA
GO:0019752	P	carboxylic acid metabolic process	77	303	2103	28397	1.5e-21	5.2e-19	// AT3G58990 // AT5G45390 // AT2G22230 // AT1G76100 // AT1G31330 // AT5G64290 // AT3G47520 // AT3G22890 // AT3G51820 // AT1G17290 // AT2G31670 // AT5G18660 // AT2G23810 // AT1G68590 // AT1G67730 // AT3G53130 // AT4G24620 // AT4G25130 // AT2G37220 // AT3G58610 // AT2G20860 // AT4G35630 // AT1G32990 // AT2G26540 // AT5G43750 // AT5G27470 // AT1G18500 // AT2G43090 // AT5G50250 // AT4G32260 // AT5G14…	Exist
GO:0015979	P	photosynthesis	35	303	435	28397	1.4e-19	4.4e-17	// AT2G30570 // AT4G32260 // AT1G75690 // AT1G31330 // AT5G08050 // AT5G58330 // AT3G27925 // AT4G33480 // AT2G37220 // AT5G50250 // AT1G05140 // AT5G14740 // AT5G42270 // AT1G54780 // AT1G14345 // AT3G55800 // AT1G55670 // AT2G32480 // AT1G76100 // AT1G75460 // AT1G67740 // AT1G32060 // AT3G01500 // AT5G45390 // AT5G52780 // AT3G23700 // AT5G06290 // AT1G77490 // AT2G05710 // AT1G76450 // AT4G04…	Exist
GO:0051186	P	cofactor metabolic process	44	303	753	28397	2.5e-19	6.7e-17	// AT3G54660 // AT5G05200 // AT2G22230 // AT1G75690 // AT1G76490 // AT3G27925 // AT3G51820 // AT5G18660 // AT3G26060 // AT5G08050 // AT3G53130 // AT1G32990 // AT2G20860 // AT2G26540 // AT2G46505 // AT5G50250 // AT4G32260 // AT5G42270 // AT3G14067 // AT2G25830 // AT3G55800 // AT1G55670 // AT2G24090 // AT4G01900 // AT4G09010 // AT4G13830 // AT1G54780 // AT1G14345 // AT5G47030 // AT1G32060 // AT3G01…	Exist
GO:0006007	P	glucose catabolic process	36	303	474	28397	2.4e-19	6.7e-17	// AT4G32260 // AT1G75690 // AT5G08050 // AT3G22890 // AT3G51820 // AT5G62350 // AT5G18660 // AT4G09010 // AT3G27925 // AT4G24620 // AT3G58610 // AT3G63460 // AT5G27470 // AT5G50250 // AT2G46505 // AT5G42270 // AT1G14345 // AT3G55800 // AT2G24090 // AT5G06600 // AT2G43090 // AT5G47030 // AT1G32060 // AT3G01500 // AT5G62220 // AT1G20696 // AT5G52780 // AT3G23700 // AT5G06290 // AT3G22960 // AT2G05…	NA
GO:0019320	P	hexose catabolic process	36	303	476	28397	2.7e-19	6.8e-17	// AT4G32260 // AT1G75690 // AT5G08050 // AT3G22890 // AT3G51820 // AT5G62350 // AT5G18660 // AT4G09010 // AT3G27925 // AT4G24620 // AT3G58610 // AT3G63460 // AT5G27470 // AT5G50250 // AT2G46505 // AT5G42270 // AT1G14345 // AT3G55800 // AT2G24090 // AT5G06600 // AT2G43090 // AT5G47030 // AT1G32060 // AT3G01500 // AT5G62220 // AT1G20696 // AT5G52780 // AT3G23700 // AT5G06290 // AT3G22960 // AT2G05…	NA
GO:0046365	P	monosaccharide catabolic process	36	303	480	28397	3.5e-19	8.2e-17	// AT4G32260 // AT1G75690 // AT5G08050 // AT3G22890 // AT3G51820 // AT5G62350 // AT5G18660 // AT4G09010 // AT3G27925 // AT4G24620 // AT3G58610 // AT3G63460 // AT5G27470 // AT5G50250 // AT2G46505 // AT5G42270 // AT1G14345 // AT3G55800 // AT2G24090 // AT5G06600 // AT2G43090 // AT5G47030 // AT1G32060 // AT3G01500 // AT5G62220 // AT1G20696 // AT5G52780 // AT3G23700 // AT5G06290 // AT3G22960 // AT2G05…	NA
GO:0019684	P	photosynthesis, light reaction	31	303	333	28397	4.1e-19	9e-17	// AT2G30570 // AT4G32260 // AT1G75690 // AT5G08050 // AT5G58330 // AT3G27925 // AT4G33480 // AT2G37220 // AT5G50250 // AT1G05140 // AT5G14740 // AT5G42270 // AT1G54780 // AT1G14345 // AT3G55800 // AT1G55670 // AT2G32480 // AT1G75460 // AT1G67740 // AT1G32060 // AT3G01500 // AT5G45390 // AT5G52780 // AT3G23700 // AT5G06290 // AT1G76100 // AT4G04020 // AT4G09010 // AT1G19740 // AT1G16880 // AT5G08…	Exist
GO:0046164	P	alcohol catabolic process	36	303	491	28397	7e-19	1.4e-16	// AT4G32260 // AT1G75690 // AT5G08050 // AT3G22890 // AT3G51820 // AT5G62350 // AT5G18660 // AT4G09010 // AT3G27925 // AT4G24620 // AT3G58610 // AT3G63460 // AT5G27470 // AT5G50250 // AT2G46505 // AT5G42270 // AT1G14345 // AT3G55800 // AT2G24090 // AT5G06600 // AT2G43090 // AT5G47030 // AT1G32060 // AT3G01500 // AT5G62220 // AT1G20696 // AT5G52780 // AT3G23700 // AT5G06290 // AT3G22960 // AT2G05…	NA
GO:0009657	P	plastid organization	32	303	398	28397	5.8e-18	1.1e-15	// AT3G54660 // AT2G30570 // AT4G32260 // AT1G75690 // AT3G51820 // AT5G58330 // AT3G23400 // AT1G68590 // AT2G39140 // AT5G08050 // AT1G32990 // AT5G43750 // AT3G46740 // AT5G50250 // AT2G38140 // AT1G54780 // AT3G55800 // AT2G32480 // AT3G07430 // AT3G19170 // AT1G06950 // AT1G67740 // AT3G55250 // AT1G32060 // AT5G45390 // AT3G23700 // AT5G06290 // AT1G77490 // AT1G44920 // AT1G20340 // AT1G76…	Exist
GO:0016052	P	carbohydrate catabolic process	37	303	573	28397	1.1e-17	2.1e-15	// AT2G22230 // AT1G75690 // AT3G27925 // AT3G22890 // AT3G51820 // AT5G62350 // AT5G18660 // AT4G09010 // AT5G08050 // AT4G24620 // AT3G23700 // AT3G58610 // AT3G63460 // AT5G27470 // AT5G50250 // AT2G46505 // AT5G42270 // AT1G14345 // AT3G55800 // AT2G24090 // AT5G06600 // AT2G43090 // AT5G47030 // AT1G32060 // AT3G01500 // AT5G62220 // AT1G20696 // AT5G52780 // AT4G32260 // AT5G06290 // AT3G22…	NA
GO:0044275	P	cellular carbohydrate catabolic process	36	303	545	28397	1.6e-17	2.8e-15	// AT4G32260 // AT1G75690 // AT5G08050 // AT3G22890 // AT3G51820 // AT5G62350 // AT5G18660 // AT4G09010 // AT3G27925 // AT4G24620 // AT3G58610 // AT3G63460 // AT5G27470 // AT5G50250 // AT2G46505 // AT5G42270 // AT1G14345 // AT3G55800 // AT2G24090 // AT5G06600 // AT2G43090 // AT5G47030 // AT1G32060 // AT3G01500 // AT5G62220 // AT1G20696 // AT5G52780 // AT3G23700 // AT5G06290 // AT3G22960 // AT2G05…	NA
GO:0044282	P	small molecule catabolic process	46	303	932	28397	1.8e-17	3.1e-15	// AT4G32260 // AT1G75690 // AT3G27925 // AT3G22890 // AT3G51820 // AT1G17290 // AT5G62350 // AT5G18660 // AT4G09010 // AT5G08050 // AT4G24620 // AT4G25130 // AT3G58610 // AT3G63460 // AT5G19590 // AT5G27470 // AT5G50250 // AT2G46505 // AT5G42270 // AT1G14345 // AT3G55800 // AT2G24090 // AT2G20860 // AT5G06600 // AT2G43090 // AT2G02390 // AT5G47030 // AT1G32060 // AT3G01500 // AT5G62220 // AT1G20…	Exist
GO:0006006	P	glucose metabolic process	36	303	554	28397	2.6e-17	4.2e-15	// AT4G32260 // AT1G75690 // AT5G08050 // AT3G22890 // AT3G51820 // AT5G62350 // AT5G18660 // AT4G09010 // AT3G27925 // AT4G24620 // AT3G58610 // AT3G63460 // AT5G27470 // AT5G50250 // AT2G46505 // AT5G42270 // AT1G14345 // AT3G55800 // AT2G24090 // AT5G06600 // AT2G43090 // AT5G47030 // AT1G32060 // AT3G01500 // AT5G62220 // AT1G20696 // AT5G52780 // AT3G23700 // AT5G06290 // AT3G22960 // AT2G05…	NA
GO:0019318	P	hexose metabolic process	37	303	602	28397	5e-17	7.7e-15	// AT4G32260 // AT1G75690 // AT3G27925 // AT3G22890 // AT3G51820 // AT5G62350 // AT5G18660 // AT4G09010 // AT5G08050 // AT4G24620 // AT3G58610 // AT3G63460 // AT5G27470 // AT5G50250 // AT2G46505 // AT5G42270 // AT1G14345 // AT3G55800 // AT2G24090 // AT1G07110 // AT5G06600 // AT2G43090 // AT5G47030 // AT1G32060 // AT3G01500 // AT5G62220 // AT1G20696 // AT5G52780 // AT3G23700 // AT5G06290 // AT3G22…	NA
GO:0006733	P	oxidoreduction coenzyme metabolic process	26	303	267	28397	1.2e-16	1.8e-14	// AT2G22230 // AT1G75690 // AT3G27925 // AT3G51820 // AT5G18660 // AT5G08050 // AT2G20860 // AT5G50250 // AT4G32260 // AT5G42270 // AT1G14345 // AT3G55800 // AT1G55670 // AT2G24090 // AT4G01900 // AT4G09010 // AT5G47030 // AT1G32060 // AT3G01500 // AT5G52780 // AT3G23700 // AT5G06290 // AT1G20340 // AT1G76450 // AT5G08280 // AT2G30200	Exist
GO:0044272	P	sulfur compound biosynthetic process	33	303	486	28397	1.8e-16	2.6e-14	// AT3G58990 // AT4G27520 // AT2G22230 // AT1G31330 // AT2G05920 // AT3G22890 // AT3G51820 // AT5G58330 // AT2G31670 // AT5G18660 // AT3G26060 // AT3G27925 // AT2G20860 // AT4G32260 // AT5G42270 // AT1G54780 // AT3G55800 // AT1G55670 // AT5G06290 // AT4G13840 // AT1G66430 // AT1G16410 // AT1G67740 // AT1G32060 // AT4G01900 // AT2G43100 // AT1G76100 // AT1G20340 // AT2G31790 // AT1G56190 // AT4G24…	NA
GO:0006790	P	sulfur metabolic process	38	303	683	28397	3.9e-16	5.4e-14	// AT3G58990 // AT3G54660 // AT4G27520 // AT2G22230 // AT1G31330 // AT2G05920 // AT3G22890 // AT3G51820 // AT1G17290 // AT2G31670 // AT5G18660 // AT2G23810 // AT3G26060 // AT1G19920 // AT3G27925 // AT2G20860 // AT4G32260 // AT5G42270 // AT1G54780 // AT3G55800 // AT1G55670 // AT5G06290 // AT4G13840 // AT1G66430 // AT1G16410 // AT1G67740 // AT1G32060 // AT4G09010 // AT5G58330 // AT4G01900 // AT2G43…	NA
GO:0046394	P	carboxylic acid biosynthetic process	48	303	1116	28397	5.9e-16	7.1e-14	// AT3G58990 // AT2G22230 // AT1G31330 // AT2G05920 // AT3G22890 // AT3G51820 // AT3G48560 // AT2G31670 // AT5G18660 // AT3G26060 // AT1G67730 // AT3G53130 // AT2G37220 // AT3G58610 // AT2G20860 // AT4G35630 // AT2G26540 // AT1G18500 // AT2G43090 // AT5G50250 // AT4G32260 // AT5G14740 // AT3G25770 // AT1G54780 // AT2G25830 // AT3G55800 // AT1G55670 // AT5G06290 // AT1G66430 // AT3G54640 // AT1G67…	Exist
GO:0006732	P	coenzyme metabolic process	33	303	508	28397	6.1e-16	7.1e-14	// AT3G54660 // AT2G22230 // AT1G75690 // AT1G76490 // AT3G27925 // AT3G51820 // AT5G18660 // AT5G08050 // AT3G23700 // AT2G20860 // AT5G50250 // AT2G46505 // AT5G42270 // AT1G14345 // AT3G55800 // AT1G55670 // AT2G24090 // AT5G06290 // AT4G09010 // AT5G47030 // AT1G32060 // AT3G01500 // AT4G12730 // AT5G52780 // AT4G32260 // AT4G01900 // AT3G08680 // AT5G16390 // AT1G20340 // AT1G76450 // AT5G66…	Exist
GO:0016053	P	organic acid biosynthetic process	48	303	1116	28397	5.9e-16	7.1e-14	// AT3G58990 // AT2G22230 // AT1G31330 // AT2G05920 // AT3G22890 // AT3G51820 // AT3G48560 // AT2G31670 // AT5G18660 // AT3G26060 // AT1G67730 // AT3G53130 // AT2G37220 // AT3G58610 // AT2G20860 // AT4G35630 // AT2G26540 // AT1G18500 // AT2G43090 // AT5G50250 // AT4G32260 // AT5G14740 // AT3G25770 // AT1G54780 // AT2G25830 // AT3G55800 // AT1G55670 // AT5G06290 // AT1G66430 // AT3G54640 // AT1G67…	Exist
GO:0009240	P	isopentenyl diphosphate biosynthetic process	24	303	233	28397	6e-16	7.1e-14	// AT1G76490 // AT3G51820 // AT5G18660 // AT1G68590 // AT3G53130 // AT1G32990 // AT2G20860 // AT4G24620 // AT5G43750 // AT5G50250 // AT1G54780 // AT1G14345 // AT3G55800 // AT1G01080 // AT1G74070 // AT5G45390 // AT3G23700 // AT4G01900 // AT1G44920 // AT2G47590 // AT3G17210 // AT4G09010 // AT3G15520 // AT5G08280	NA
GO:0046490	P	isopentenyl diphosphate metabolic process	24	303	233	28397	6e-16	7.1e-14	// AT1G76490 // AT3G51820 // AT5G18660 // AT1G68590 // AT3G53130 // AT1G32990 // AT2G20860 // AT4G24620 // AT5G43750 // AT5G50250 // AT1G54780 // AT1G14345 // AT3G55800 // AT1G01080 // AT1G74070 // AT5G45390 // AT3G23700 // AT4G01900 // AT1G44920 // AT2G47590 // AT3G17210 // AT4G09010 // AT3G15520 // AT5G08280	NA
GO:0044271	P	cellular nitrogen compound biosynthetic process	40	303	804	28397	2.2e-15	2.5e-13	// AT3G58990 // AT2G22230 // AT1G31330 // AT2G05920 // AT3G22890 // AT3G51820 // AT3G48560 // AT2G31670 // AT5G18660 // AT4G09010 // AT3G26060 // AT5G08050 // AT3G53130 // AT1G32990 // AT3G58610 // AT2G20860 // AT4G35630 // AT2G26540 // AT1G18500 // AT1G66430 // AT1G54780 // AT2G25830 // AT3G55800 // AT1G55670 // AT2G43090 // AT3G54640 // AT1G67740 // AT1G32060 // AT3G23700 // AT4G01900 // AT5G19…	NA
GO:0006740	P	NADPH regeneration	22	303	201	28397	3.2e-15	3.5e-13	// AT4G32260 // AT1G75690 // AT5G08050 // AT3G51820 // AT5G18660 // AT3G27925 // AT5G50250 // AT5G42270 // AT1G14345 // AT3G55800 // AT1G55670 // AT2G24090 // AT5G47030 // AT1G32060 // AT3G01500 // AT5G52780 // AT3G23700 // AT5G06290 // AT1G20340 // AT1G76450 // AT4G09010 // AT5G08280	NA
GO:0019288	P	isopentenyl diphosphate biosynthetic process, mevalonate-independent pathway	23	303	229	28397	4e-15	4.3e-13	// AT3G51820 // AT5G18660 // AT1G68590 // AT3G53130 // AT1G32990 // AT2G20860 // AT4G24620 // AT5G43750 // AT5G50250 // AT1G54780 // AT1G14345 // AT3G55800 // AT1G01080 // AT1G74070 // AT5G45390 // AT3G23700 // AT4G01900 // AT1G44920 // AT2G47590 // AT3G17210 // AT4G09010 // AT3G15520 // AT5G08280	NA
GO:0006739	P	NADP metabolic process	22	303	204	28397	4.2e-15	4.4e-13	// AT4G32260 // AT1G75690 // AT5G08050 // AT3G51820 // AT5G18660 // AT3G27925 // AT5G50250 // AT5G42270 // AT1G14345 // AT3G55800 // AT1G55670 // AT2G24090 // AT5G47030 // AT1G32060 // AT3G01500 // AT5G52780 // AT3G23700 // AT5G06290 // AT1G20340 // AT1G76450 // AT4G09010 // AT5G08280	NA
GO:0019682	P	glyceraldehyde-3-phosphate metabolic process	23	303	232	28397	5.2e-15	5.2e-13	// AT3G51820 // AT5G18660 // AT1G68590 // AT3G53130 // AT1G32990 // AT2G20860 // AT4G24620 // AT5G43750 // AT5G50250 // AT1G54780 // AT1G14345 // AT3G55800 // AT1G01080 // AT1G74070 // AT5G45390 // AT3G23700 // AT4G01900 // AT1G44920 // AT2G47590 // AT3G17210 // AT4G09010 // AT3G15520 // AT5G08280	NA
GO:0046496	P	nicotinamide nucleotide metabolic process	22	303	212	28397	8.8e-15	8.3e-13	// AT4G32260 // AT1G75690 // AT5G08050 // AT3G51820 // AT5G18660 // AT3G27925 // AT5G50250 // AT5G42270 // AT1G14345 // AT3G55800 // AT1G55670 // AT2G24090 // AT5G47030 // AT1G32060 // AT3G01500 // AT5G52780 // AT3G23700 // AT5G06290 // AT1G20340 // AT1G76450 // AT4G09010 // AT5G08280	Exist
GO:0006769	P	nicotinamide metabolic process	22	303	212	28397	8.8e-15	8.3e-13	// AT4G32260 // AT1G75690 // AT5G08050 // AT3G51820 // AT5G18660 // AT3G27925 // AT5G50250 // AT5G42270 // AT1G14345 // AT3G55800 // AT1G55670 // AT2G24090 // AT5G47030 // AT1G32060 // AT3G01500 // AT5G52780 // AT3G23700 // AT5G06290 // AT1G20340 // AT1G76450 // AT4G09010 // AT5G08280	NA
GO:0019362	P	pyridine nucleotide metabolic process	22	303	214	28397	1e-14	9.5e-13	// AT4G32260 // AT1G75690 // AT5G08050 // AT3G51820 // AT5G18660 // AT3G27925 // AT5G50250 // AT5G42270 // AT1G14345 // AT3G55800 // AT1G55670 // AT2G24090 // AT5G47030 // AT1G32060 // AT3G01500 // AT5G52780 // AT3G23700 // AT5G06290 // AT1G20340 // AT1G76450 // AT4G09010 // AT5G08280	Exist
GO:0009987	P	cellular process	220	303	14419	28397	1e-14	9.5e-13	// AT2G31670 // AT3G54660 // AT2G30570 // AT5G05200 // AT2G11890 // AT2G22230 // AT1G75690 // AT1G76490 // AT3G58120 // AT3G47520 // AT3G51820 // AT1G79830 // AT5G11770 // AT1G76880 // AT5G08050 // AT4G24620 // AT2G20860 // AT3G26740 // AT4G00895 // AT5G57180 // AT1G18500 // AT3G18035 // AT5G50250 // AT1G08200 // AT2G47730 // AT2G35860 // AT1G61740 // AT3G15840 // AT4G09040 // AT1G07110 // AT5G35…	Exist
GO:0043603	P	cellular amide metabolic process	22	303	222	28397	2.1e-14	1.8e-12	// AT4G32260 // AT1G75690 // AT5G08050 // AT3G51820 // AT5G18660 // AT3G27925 // AT5G50250 // AT5G42270 // AT1G14345 // AT3G55800 // AT1G55670 // AT2G24090 // AT5G47030 // AT1G32060 // AT3G01500 // AT5G52780 // AT3G23700 // AT5G06290 // AT1G20340 // AT1G76450 // AT4G09010 // AT5G08280	NA
GO:0009820	P	alkaloid metabolic process	22	303	225	28397	2.7e-14	2.3e-12	// AT4G32260 // AT1G75690 // AT5G08050 // AT3G51820 // AT5G18660 // AT3G27925 // AT5G50250 // AT5G42270 // AT1G14345 // AT3G55800 // AT1G55670 // AT2G24090 // AT5G47030 // AT1G32060 // AT3G01500 // AT5G52780 // AT3G23700 // AT5G06290 // AT1G20340 // AT1G76450 // AT4G09010 // AT5G08280	NA
GO:0044283	P	small molecule biosynthetic process	60	303	1865	28397	2.9e-14	2.4e-12	// AT3G58990 // AT2G22230 // AT1G76100 // AT1G31330 // AT2G05920 // AT3G22890 // AT3G51820 // AT1G17290 // AT2G31670 // AT5G18660 // AT1G22850 // AT3G26060 // AT1G67730 // AT3G53130 // AT4G19170 // AT2G23810 // AT2G37220 // AT3G58610 // AT2G20860 // AT4G35630 // AT4G24620 // AT2G26540 // AT5G27470 // AT1G18500 // AT2G43090 // AT5G50250 // AT4G32260 // AT5G14740 // AT3G48560 // AT3G25770 // AT1G61…	Exist
GO:0006098	P	pentose-phosphate shunt	21	303	200	28397	2.9e-14	2.4e-12	// AT3G01500 // AT5G52780 // AT4G32260 // AT1G75690 // AT1G14345 // AT3G27925 // AT5G47030 // AT1G20340 // AT3G51820 // AT1G32060 // AT5G50250 // AT5G18660 // AT4G09010 // AT1G76450 // AT5G08050 // AT3G55800 // AT3G23700 // AT5G06290 // AT2G24090 // AT5G08280 // AT5G42270	NA
GO:0032787	P	monocarboxylic acid metabolic process	52	303	1481	28397	8.1e-14	6.5e-12	// AT2G22230 // AT3G22890 // AT3G51820 // AT5G19240 // AT5G18660 // AT1G68590 // AT1G67730 // AT3G53130 // AT1G32990 // AT5G19590 // AT2G37220 // AT3G58610 // AT2G20860 // AT4G24620 // AT5G43750 // AT5G27470 // AT5G50250 // AT4G32260 // AT5G14740 // AT3G17210 // AT3G25770 // AT1G54780 // AT1G14345 // AT3G55800 // AT1G65290 // AT4G20360 // AT5G06290 // AT1G66430 // AT1G01080 // AT2G02390 // AT1G74…	Exist
GO:0008652	P	cellular amino acid biosynthetic process	30	303	503	28397	1.1e-13	8.9e-12	// AT3G58990 // AT2G22230 // AT1G31330 // AT2G05920 // AT1G42960 // AT3G51820 // AT3G48560 // AT2G31670 // AT5G18660 // AT3G26060 // AT3G58610 // AT2G20860 // AT4G35630 // AT1G18500 // AT1G66430 // AT1G54780 // AT2G25830 // AT3G55800 // AT1G55670 // AT2G43090 // AT1G67740 // AT1G32060 // AT4G01900 // AT2G43100 // AT1G76100 // AT1G20340 // AT1G56190 // AT3G54640 // AT3G57560 // AT5G08280	Exist
GO:0006090	P	pyruvate metabolic process	27	303	398	28397	1.2e-13	9e-12	// AT3G22890 // AT3G51820 // AT5G18660 // AT1G68590 // AT3G53130 // AT1G32990 // AT3G58610 // AT2G20860 // AT4G24620 // AT5G43750 // AT5G27470 // AT5G50250 // AT1G54780 // AT1G14345 // AT3G55800 // AT1G01080 // AT1G74070 // AT5G45390 // AT3G23700 // AT4G01900 // AT1G44920 // AT2G47590 // AT2G05710 // AT3G17210 // AT4G09010 // AT3G15520 // AT5G08280	Exist
GO:0006081	P	cellular aldehyde metabolic process	25	303	334	28397	1.3e-13	9.6e-12	// AT3G51820 // AT5G18660 // AT1G68590 // AT3G53130 // AT1G32990 // AT2G20860 // AT4G24620 // AT5G43750 // AT5G50250 // AT5G14740 // AT1G54780 // AT1G14345 // AT3G55800 // AT1G01080 // AT1G74070 // AT5G45390 // AT3G23700 // AT4G01900 // AT1G44920 // AT2G47590 // AT3G54690 // AT3G17210 // AT4G09010 // AT3G15520 // AT5G08280	Exist
GO:0019748	P	secondary metabolic process	47	303	1247	28397	1.3e-13	9.8e-12	// AT3G58990 // AT3G54660 // AT4G27520 // AT4G32260 // AT1G75690 // AT1G76490 // AT3G27925 // AT3G22890 // AT3G51820 // AT5G58330 // AT2G31670 // AT5G18660 // AT3G26060 // AT5G08050 // AT3G53130 // AT4G19170 // AT2G20860 // AT5G50250 // AT2G47730 // AT5G42270 // AT1G61740 // AT4G01070 // AT3G55800 // AT1G55670 // AT2G24090 // AT5G06290 // AT4G13840 // AT1G16410 // AT1G54780 // AT2G43800 // AT2G02…	NA
GO:0008654	P	phospholipid biosynthetic process	27	303	405	28397	1.7e-13	1.3e-11	// AT1G76490 // AT3G51820 // AT5G18660 // AT1G68590 // AT3G53130 // AT1G32990 // AT2G20860 // AT4G24620 // AT5G43750 // AT5G50250 // AT1G54780 // AT1G14345 // AT3G55800 // AT1G01080 // AT1G74070 // AT5G45390 // AT3G23700 // AT4G01900 // AT1G44920 // AT2G47590 // AT1G01610 // AT3G25660 // AT4G26710 // AT3G17210 // AT4G09010 // AT3G15520 // AT5G08280	NA
GO:0006520	P	cellular amino acid metabolic process	39	303	882	28397	1.8e-13	1.3e-11	// AT3G58990 // AT2G22230 // AT1G31330 // AT5G64290 // AT3G22890 // AT3G51820 // AT1G17290 // AT2G31670 // AT5G18660 // AT2G23810 // AT3G26060 // AT4G25130 // AT3G58610 // AT2G20860 // AT4G35630 // AT5G27470 // AT1G18500 // AT3G48560 // AT1G66430 // AT1G54780 // AT2G25830 // AT3G55800 // AT1G55670 // AT2G43090 // AT2G05920 // AT3G54640 // AT1G67740 // AT1G32060 // AT5G12860 // AT4G01900 // AT5G19…	Exist
GO:0016051	P	carbohydrate biosynthetic process	43	303	1070	28397	2.1e-13	1.5e-11	// AT3G58990 // AT3G51510 // AT4G27520 // AT2G22230 // AT3G22890 // AT5G58330 // AT2G31670 // AT4G13840 // AT1G22850 // AT3G26060 // AT3G27925 // AT4G24620 // AT3G54920 // AT3G58610 // AT5G05200 // AT5G50250 // AT5G27470 // AT2G35960 // AT4G32260 // AT5G42270 // AT1G54780 // AT3G55800 // AT1G66430 // AT3G46970 // AT5G06700 // AT3G55250 // AT1G16410 // AT5G62220 // AT5G06290 // AT5G16390 // AT2G43…	Exist
GO:0009309	P	amine biosynthetic process	30	303	527	28397	3.5e-13	2.4e-11	// AT3G58990 // AT2G22230 // AT1G31330 // AT2G05920 // AT1G42960 // AT3G51820 // AT3G48560 // AT2G31670 // AT5G18660 // AT3G26060 // AT3G58610 // AT2G20860 // AT4G35630 // AT1G18500 // AT1G66430 // AT1G54780 // AT2G25830 // AT3G55800 // AT1G55670 // AT2G43090 // AT1G67740 // AT1G32060 // AT4G01900 // AT2G43100 // AT1G76100 // AT1G20340 // AT1G56190 // AT3G54640 // AT3G57560 // AT5G08280	NA
GO:0044106	P	cellular amine metabolic process	40	303	947	28397	3.5e-13	2.4e-11	// AT3G58990 // AT2G22230 // AT1G31330 // AT5G64290 // AT3G22890 // AT3G51820 // AT1G17290 // AT2G31670 // AT5G18660 // AT2G23810 // AT3G26060 // AT4G25130 // AT3G58610 // AT2G20860 // AT4G35630 // AT5G27470 // AT1G18500 // AT3G48560 // AT1G66430 // AT1G54780 // AT2G25830 // AT3G55800 // AT1G55670 // AT2G43090 // AT2G05920 // AT3G54640 // AT1G67740 // AT1G32060 // AT5G12860 // AT4G01900 // AT5G19…	NA
GO:0044248	P	cellular catabolic process	62	303	2095	28397	3.6e-13	2.4e-11	// AT3G54660 // AT5G05200 // AT4G32260 // AT1G75690 // AT3G27925 // AT5G11770 // AT3G22890 // AT3G51820 // AT1G60870 // AT5G62350 // AT5G18660 // AT1G17290 // AT4G00585 // AT5G08050 // AT4G13830 // AT4G24620 // AT4G25130 // AT3G58610 // AT2G20860 // AT5G19590 // AT5G27470 // AT2G18960 // AT5G50250 // AT2G46505 // AT5G14740 // AT2G47730 // AT5G42270 // AT3G14067 // AT4G01070 // AT3G55800 // AT1G21…	Exist
GO:0044237	P	cellular metabolic process	185	303	11509	28397	6.5e-13	4.1e-11	// AT3G54660 // AT2G30570 // AT5G05200 // AT2G11890 // AT2G22230 // AT1G75690 // AT1G76490 // AT3G47520 // AT3G51820 // AT1G76880 // AT5G08050 // AT4G24620 // AT2G20860 // AT4G00895 // AT5G57180 // AT1G18500 // AT5G50250 // AT1G08200 // AT2G47730 // AT2G43090 // AT1G61740 // AT3G15840 // AT4G09040 // AT1G07110 // AT5G35100 // AT3G07430 // AT3G53890 // AT2G43800 // AT2G02390 // AT1G14345 // AT1G66…	Exist
GO:0009056	P	catabolic process	63	303	2182	28397	6.5e-13	4.1e-11	// AT3G54660 // AT5G05200 // AT2G22230 // AT1G75690 // AT3G27925 // AT5G11770 // AT3G22890 // AT3G51820 // AT1G60870 // AT5G62350 // AT5G18660 // AT1G17290 // AT4G00585 // AT5G08050 // AT4G13830 // AT4G24620 // AT4G25130 // AT3G58610 // AT2G20860 // AT2G46505 // AT5G19590 // AT5G27470 // AT2G18960 // AT5G50250 // AT4G32260 // AT5G14740 // AT2G47730 // AT5G42270 // AT3G14067 // AT4G01070 // AT3G55…	Exist
GO:0009069	P	serine family amino acid metabolic process	22	303	271	28397	8.7e-13	5.5e-11	// AT2G22230 // AT1G31330 // AT1G42960 // AT3G51820 // AT2G31670 // AT5G18660 // AT3G26060 // AT4G25130 // AT2G20860 // AT4G35630 // AT1G66430 // AT1G54780 // AT3G55800 // AT1G55670 // AT1G67740 // AT1G32060 // AT4G01900 // AT2G43100 // AT1G76100 // AT1G20340 // AT1G56190 // AT5G08280	NA
GO:0009308	P	amine metabolic process	41	303	1034	28397	1.2e-12	7.6e-11	// AT3G58990 // AT2G22230 // AT1G31330 // AT5G64290 // AT3G22890 // AT3G51820 // AT1G17290 // AT2G31670 // AT5G18660 // AT2G23810 // AT3G26060 // AT4G25130 // AT3G58610 // AT2G20860 // AT4G35630 // AT5G27470 // AT1G18500 // AT3G48560 // AT1G66430 // AT1G54780 // AT2G25830 // AT3G55800 // AT1G55670 // AT2G43090 // AT2G05920 // AT3G54640 // AT1G67740 // AT1G32060 // AT5G12860 // AT4G01900 // AT5G19…	NA
GO:0009070	P	serine family amino acid biosynthetic process	20	303	222	28397	1.7e-12	1e-10	// AT4G35630 // AT1G66430 // AT2G43100 // AT2G22230 // AT1G76100 // AT1G31330 // AT1G67740 // AT1G20340 // AT3G51820 // AT1G32060 // AT2G31670 // AT5G18660 // AT3G26060 // AT1G56190 // AT1G54780 // AT3G55800 // AT1G55670 // AT1G42960 // AT5G08280 // AT2G20860	NA
GO:0006519	P	cellular amino acid and derivative metabolic process	46	303	1324	28397	3.8e-12	2.3e-10	// AT3G58990 // AT3G54660 // AT2G22230 // AT1G31330 // AT5G64290 // AT3G22890 // AT3G51820 // AT1G17290 // AT2G31670 // AT5G18660 // AT2G23810 // AT3G26060 // AT4G19170 // AT4G25130 // AT3G58610 // AT2G20860 // AT4G35630 // AT5G27470 // AT1G18500 // AT3G48560 // AT1G66430 // AT1G61740 // AT2G25830 // AT3G55800 // AT1G55670 // AT1G76490 // AT2G43090 // AT2G05920 // AT3G54640 // AT1G54780 // AT2G43…	NA
GO:0006644	P	phospholipid metabolic process	27	303	472	28397	5e-12	3e-10	// AT1G76490 // AT3G51820 // AT5G18660 // AT1G68590 // AT3G53130 // AT1G32990 // AT2G20860 // AT4G24620 // AT5G43750 // AT5G50250 // AT1G54780 // AT1G14345 // AT3G55800 // AT1G01080 // AT1G74070 // AT5G45390 // AT3G23700 // AT4G01900 // AT1G44920 // AT2G47590 // AT1G01610 // AT3G25660 // AT4G26710 // AT3G17210 // AT4G09010 // AT3G15520 // AT5G08280	NA
GO:0019344	P	cysteine biosynthetic process	19	303	210	28397	5.7e-12	3.3e-10	// AT1G66430 // AT2G43100 // AT2G22230 // AT1G76100 // AT1G31330 // AT1G67740 // AT1G20340 // AT3G51820 // AT1G32060 // AT2G31670 // AT5G18660 // AT3G26060 // AT1G56190 // AT1G54780 // AT3G55800 // AT1G55670 // AT1G42960 // AT5G08280 // AT2G20860	NA
GO:0006534	P	cysteine metabolic process	19	303	213	28397	7.2e-12	4.1e-10	// AT1G66430 // AT2G43100 // AT2G22230 // AT1G76100 // AT1G31330 // AT1G67740 // AT1G20340 // AT3G51820 // AT1G32060 // AT2G31670 // AT5G18660 // AT3G26060 // AT1G56190 // AT1G54780 // AT3G55800 // AT1G55670 // AT1G42960 // AT5G08280 // AT2G20860	NA
GO:0009117	P	nucleotide metabolic process	32	303	685	28397	8.2e-12	4.6e-10	// AT4G32260 // AT1G75690 // AT1G76490 // AT3G27925 // AT3G51820 // AT5G18660 // AT5G08050 // AT3G58610 // AT2G20860 // AT4G00895 // AT5G27470 // AT2G18960 // AT5G50250 // AT5G42270 // AT1G14345 // AT3G55800 // AT1G55670 // AT2G24090 // AT5G06290 // AT3G07430 // AT5G47030 // AT4G11010 // AT1G32060 // AT3G01500 // AT5G52780 // AT3G23700 // AT4G01900 // AT1G20340 // AT1G76450 // AT3G05060 // AT4G09…	Exist
GO:0019637	P	organophosphate metabolic process	27	303	483	28397	8.3e-12	4.6e-10	// AT1G76490 // AT3G51820 // AT5G18660 // AT1G68590 // AT3G53130 // AT1G32990 // AT2G20860 // AT4G24620 // AT5G43750 // AT5G50250 // AT1G54780 // AT1G14345 // AT3G55800 // AT1G01080 // AT1G74070 // AT5G45390 // AT3G23700 // AT4G01900 // AT1G44920 // AT2G47590 // AT1G01610 // AT3G25660 // AT4G26710 // AT3G17210 // AT4G09010 // AT3G15520 // AT5G08280	Exist
GO:0006753	P	nucleoside phosphate metabolic process	32	303	687	28397	8.8e-12	4.8e-10	// AT4G32260 // AT1G75690 // AT1G76490 // AT3G27925 // AT3G51820 // AT5G18660 // AT5G08050 // AT3G58610 // AT2G20860 // AT4G00895 // AT5G27470 // AT2G18960 // AT5G50250 // AT5G42270 // AT1G14345 // AT3G55800 // AT1G55670 // AT2G24090 // AT5G06290 // AT3G07430 // AT5G47030 // AT4G11010 // AT1G32060 // AT3G01500 // AT5G52780 // AT3G23700 // AT4G01900 // AT1G20340 // AT1G76450 // AT3G05060 // AT4G09…	Exist
GO:0009058	P	biosynthetic process	140	303	7962	28397	1.8e-11	9.8e-10	// AT5G05200 // AT2G22230 // AT1G76490 // AT3G51820 // AT1G76880 // AT5G08050 // AT4G24620 // AT2G20860 // AT4G00895 // AT5G57180 // AT1G18500 // AT5G50250 // AT1G08200 // AT2G47730 // AT2G43090 // AT1G61740 // AT5G62220 // AT4G20360 // AT1G07110 // AT3G07430 // AT3G53890 // AT2G43800 // AT1G14345 // AT4G12730 // AT3G51950 // AT1G69690 // AT4G04770 // AT3G08680 // AT2G47590 // AT5G09330 // AT2G05…	Exist
GO:0019761	P	glucosinolate biosynthetic process	17	303	172	28397	2.1e-11	1.1e-09	// AT1G16410 // AT3G58990 // AT4G27520 // AT2G43100 // AT4G32260 // AT4G24930 // AT3G22890 // AT5G58330 // AT2G31670 // AT4G13840 // AT2G31790 // AT3G26060 // AT5G42270 // AT1G54780 // AT3G27925 // AT3G55800 // AT5G06290	NA
GO:0016144	P	S-glycoside biosynthetic process	17	303	172	28397	2.1e-11	1.1e-09	// AT1G16410 // AT3G58990 // AT4G27520 // AT2G43100 // AT4G32260 // AT4G24930 // AT3G22890 // AT5G58330 // AT2G31670 // AT4G13840 // AT2G31790 // AT3G26060 // AT5G42270 // AT1G54780 // AT3G27925 // AT3G55800 // AT5G06290	NA
GO:0019758	P	glycosinolate biosynthetic process	17	303	172	28397	2.1e-11	1.1e-09	// AT1G16410 // AT3G58990 // AT4G27520 // AT2G43100 // AT4G32260 // AT4G24930 // AT3G22890 // AT5G58330 // AT2G31670 // AT4G13840 // AT2G31790 // AT3G26060 // AT5G42270 // AT1G54780 // AT3G27925 // AT3G55800 // AT5G06290	NA
GO:0034637	P	cellular carbohydrate biosynthetic process	37	303	941	28397	2.2e-11	1.1e-09	// AT3G58990 // AT3G51510 // AT5G05200 // AT4G32260 // AT3G22890 // AT5G58330 // AT2G31670 // AT4G13840 // AT1G22850 // AT3G26060 // AT3G27925 // AT4G24620 // AT3G58610 // AT4G27520 // AT5G50250 // AT5G27470 // AT2G35960 // AT5G42270 // AT1G54780 // AT3G55800 // AT1G66430 // AT3G46970 // AT5G06700 // AT3G55250 // AT1G16410 // AT5G62220 // AT5G06290 // AT2G43100 // AT2G47590 // AT2G05710 // AT1G76…	NA
GO:0016143	P	S-glycoside metabolic process	18	303	205	28397	3.3e-11	1.6e-09	// AT1G16410 // AT3G58990 // AT4G27520 // AT2G43100 // AT4G32260 // AT4G24930 // AT3G22890 // AT5G58330 // AT2G31670 // AT4G13840 // AT4G09010 // AT3G26060 // AT5G42270 // AT1G54780 // AT3G27925 // AT3G55800 // AT2G31790 // AT5G06290	NA
GO:0019757	P	glycosinolate metabolic process	18	303	205	28397	3.3e-11	1.6e-09	// AT1G16410 // AT3G58990 // AT4G27520 // AT2G43100 // AT4G32260 // AT4G24930 // AT3G22890 // AT5G58330 // AT2G31670 // AT4G13840 // AT4G09010 // AT3G26060 // AT5G42270 // AT1G54780 // AT3G27925 // AT3G55800 // AT2G31790 // AT5G06290	NA
GO:0019760	P	glucosinolate metabolic process	18	303	205	28397	3.3e-11	1.6e-09	// AT1G16410 // AT3G58990 // AT4G27520 // AT2G43100 // AT4G32260 // AT4G24930 // AT3G22890 // AT5G58330 // AT2G31670 // AT4G13840 // AT4G09010 // AT3G26060 // AT5G42270 // AT1G54780 // AT3G27925 // AT3G55800 // AT2G31790 // AT5G06290	NA
GO:0055086	P	nucleobase, nucleoside and nucleotide metabolic process	32	303	726	28397	3.4e-11	1.7e-09	// AT4G32260 // AT1G75690 // AT1G76490 // AT3G27925 // AT3G51820 // AT5G18660 // AT5G08050 // AT3G58610 // AT2G20860 // AT4G00895 // AT5G27470 // AT2G18960 // AT5G50250 // AT5G42270 // AT1G14345 // AT3G55800 // AT1G55670 // AT2G24090 // AT5G06290 // AT3G07430 // AT5G47030 // AT4G11010 // AT1G32060 // AT3G01500 // AT5G52780 // AT3G23700 // AT4G01900 // AT1G20340 // AT1G76450 // AT3G05060 // AT4G09…	Exist
GO:0016138	P	glycoside biosynthetic process	18	303	215	28397	6.8e-11	3.2e-09	// AT1G16410 // AT3G58990 // AT4G27520 // AT2G43100 // AT4G32260 // AT4G24930 // AT3G22890 // AT5G58330 // AT2G31670 // AT4G13840 // AT2G31790 // AT3G26060 // AT5G42270 // AT1G54780 // AT3G27925 // AT3G55800 // AT5G06290 // AT1G66430	NA
GO:0015994	P	chlorophyll metabolic process	17	303	189	28397	8.3e-11	3.9e-09	// AT1G54780 // AT4G13830 // AT5G05200 // AT4G09010 // AT3G27925 // AT3G51820 // AT5G18660 // AT3G17210 // AT3G26060 // AT1G76450 // AT3G14067 // AT5G08050 // AT3G23700 // AT1G32990 // AT3G53130 // AT5G08280 // AT2G20860	Exist
GO:0009057	P	macromolecule catabolic process	42	303	1255	28397	1.1e-10	5.2e-09	// AT2G22230 // AT1G75690 // AT3G27925 // AT5G11770 // AT3G22890 // AT3G51820 // AT5G62350 // AT5G18660 // AT4G09010 // AT4G00585 // AT5G08050 // AT4G24620 // AT3G23700 // AT3G58610 // AT3G63460 // AT5G27470 // AT5G50250 // AT2G46505 // AT5G42270 // AT1G14345 // AT3G55800 // AT1G21310 // AT2G24090 // AT5G06600 // AT2G43090 // AT2G02390 // AT5G47030 // AT1G32060 // AT3G01500 // AT5G62220 // AT1G20…	NA
GO:0044265	P	cellular macromolecule catabolic process	41	303	1208	28397	1.3e-10	5.9e-09	// AT4G32260 // AT1G75690 // AT3G27925 // AT5G11770 // AT3G22890 // AT3G51820 // AT5G62350 // AT5G18660 // AT4G09010 // AT4G00585 // AT5G08050 // AT4G24620 // AT3G58610 // AT3G63460 // AT5G27470 // AT5G50250 // AT2G46505 // AT5G42270 // AT1G14345 // AT3G55800 // AT1G21310 // AT2G24090 // AT5G06600 // AT2G43090 // AT2G02390 // AT5G47030 // AT1G32060 // AT3G01500 // AT5G62220 // AT1G20696 // AT5G52…	NA
GO:0008610	P	lipid biosynthetic process	40	303	1159	28397	1.4e-10	6.2e-09	// AT2G22230 // AT1G76490 // AT3G51820 // AT5G18660 // AT1G68590 // AT1G67730 // AT3G53130 // AT1G32990 // AT2G20860 // AT4G24620 // AT5G43750 // AT5G50250 // AT3G17210 // AT3G25770 // AT1G54780 // AT1G14345 // AT3G55800 // AT5G43760 // AT1G01080 // AT1G74070 // AT4G12730 // AT5G45390 // AT5G12860 // AT3G23700 // AT3G28200 // AT4G01900 // AT3G08680 // AT5G16390 // AT3G22960 // AT1G44920 // AT2G47…	Exist
GO:0006778	P	porphyrin metabolic process	18	303	226	28397	1.5e-10	6.5e-09	// AT1G54780 // AT4G13830 // AT5G05200 // AT2G26540 // AT4G09010 // AT3G27925 // AT3G51820 // AT5G18660 // AT3G17210 // AT3G26060 // AT1G76450 // AT3G14067 // AT5G08050 // AT3G23700 // AT1G32990 // AT3G53130 // AT5G08280 // AT2G20860	Exist
GO:0033013	P	tetrapyrrole metabolic process	18	303	227	28397	1.6e-10	6.8e-09	// AT1G54780 // AT4G13830 // AT5G05200 // AT2G26540 // AT4G09010 // AT3G27925 // AT3G51820 // AT5G18660 // AT3G17210 // AT3G26060 // AT1G76450 // AT3G14067 // AT5G08050 // AT3G23700 // AT1G32990 // AT3G53130 // AT5G08280 // AT2G20860	Exist
GO:0008299	P	isoprenoid biosynthetic process	25	303	477	28397	1.8e-10	8e-09	// AT1G76490 // AT3G51820 // AT5G18660 // AT1G68590 // AT3G53130 // AT1G32990 // AT2G20860 // AT4G24620 // AT5G43750 // AT5G50250 // AT1G54780 // AT1G14345 // AT3G55800 // AT1G01080 // AT1G74070 // AT5G45390 // AT3G23700 // AT4G01900 // AT1G44920 // AT2G47590 // AT3G17210 // AT4G09010 // AT3G15520 // AT3G26060 // AT5G08280	NA
GO:0046483	P	heterocycle metabolic process	37	303	1023	28397	2.1e-10	9e-09	// AT5G05200 // AT4G32260 // AT1G76490 // AT3G27925 // AT3G22890 // AT3G51820 // AT5G19240 // AT5G18660 // AT3G26060 // AT5G08050 // AT3G53130 // AT1G32990 // AT3G58610 // AT2G20860 // AT4G00895 // AT2G26540 // AT2G18960 // AT3G17210 // AT1G66430 // AT3G14067 // AT4G01070 // AT3G07430 // AT4G13830 // AT1G54780 // AT5G47030 // AT2G25830 // AT4G11010 // AT3G54640 // AT3G23700 // AT4G01900 // AT2G43…	NA
GO:0044249	P	cellular biosynthetic process	134	303	7737	28397	2.3e-10	9.6e-09	// AT5G05200 // AT2G22230 // AT1G76490 // AT3G51820 // AT1G76880 // AT5G08050 // AT4G24620 // AT2G20860 // AT4G00895 // AT5G57180 // AT1G18500 // AT5G50250 // AT1G08200 // AT2G47730 // AT2G43090 // AT1G61740 // AT5G62220 // AT4G20360 // AT1G07110 // AT3G07430 // AT3G53890 // AT2G43800 // AT1G14345 // AT3G51950 // AT1G69690 // AT4G04770 // AT2G47590 // AT5G09330 // AT2G05710 // AT1G20340 // AT1G19…	Exist
GO:0010207	P	photosystem II assembly	16	303	177	28397	2.8e-10	1.2e-08	// AT2G30570 // AT1G75460 // AT4G32260 // AT1G75690 // AT5G45390 // AT1G67740 // AT4G33480 // AT5G52780 // AT1G54780 // AT1G14345 // AT3G55800 // AT1G19740 // AT2G32480 // AT1G32060 // AT5G58330 // AT1G05140	Exist
GO:0016137	P	glycoside metabolic process	19	303	268	28397	2.8e-10	1.2e-08	// AT1G16410 // AT3G58990 // AT4G27520 // AT2G43100 // AT4G32260 // AT4G24930 // AT2G31790 // AT3G22890 // AT5G58330 // AT2G31670 // AT4G13840 // AT4G09010 // AT3G26060 // AT5G42270 // AT1G54780 // AT3G27925 // AT3G55800 // AT5G06290 // AT1G66430	NA
GO:0000097	P	sulfur amino acid biosynthetic process	20	303	309	28397	4.3e-10	1.7e-08	// AT1G66430 // AT2G43100 // AT2G22230 // AT1G76100 // AT1G31330 // AT2G05920 // AT1G67740 // AT1G20340 // AT3G51820 // AT1G32060 // AT2G31670 // AT5G18660 // AT3G26060 // AT1G56190 // AT1G54780 // AT3G55800 // AT1G55670 // AT1G42960 // AT5G08280 // AT2G20860	NA
GO:0006720	P	isoprenoid metabolic process	25	303	500	28397	4.7e-10	1.9e-08	// AT1G76490 // AT3G51820 // AT5G18660 // AT1G68590 // AT3G53130 // AT1G32990 // AT2G20860 // AT4G24620 // AT5G43750 // AT5G50250 // AT1G54780 // AT1G14345 // AT3G55800 // AT1G01080 // AT1G74070 // AT5G45390 // AT3G23700 // AT4G01900 // AT1G44920 // AT2G47590 // AT3G17210 // AT4G09010 // AT3G15520 // AT3G26060 // AT5G08280	Exist
GO:0008152	P	metabolic process	199	303	13633	28397	5.3e-10	2.1e-08	// AT3G54660 // AT2G30570 // AT5G05200 // AT2G11890 // AT2G22230 // AT1G75690 // AT1G76490 // AT3G47520 // AT3G51820 // AT1G76880 // AT5G08050 // AT4G24620 // AT2G20860 // AT4G00895 // AT5G57180 // AT1G18500 // AT3G14240 // AT5G50250 // AT1G08200 // AT3G14650 // AT2G47730 // AT2G43090 // AT1G61740 // AT3G15840 // AT4G09040 // AT1G07110 // AT5G35100 // AT3G07430 // AT3G53890 // AT2G43800 // AT2G02…	Exist
GO:0042440	P	pigment metabolic process	21	303	361	28397	9.6e-10	3.8e-08	// AT1G54780 // AT1G32990 // AT4G13830 // AT5G05200 // AT2G43800 // AT2G47590 // AT3G17210 // AT4G09010 // AT3G27925 // AT3G51820 // AT5G18660 // AT4G01900 // AT3G26060 // AT1G76450 // AT3G14067 // AT5G08050 // AT3G23700 // AT4G19170 // AT3G53130 // AT5G08280 // AT2G20860	Exist
GO:0016043	P	cellular component organization	71	303	3141	28397	1e-09	4e-08	// AT3G22120 // AT3G54660 // AT2G30570 // AT2G39140 // AT2G22230 // AT5G38560 // AT1G76490 // AT1G17440 // AT3G22890 // AT3G51820 // AT5G58330 // AT5G62350 // AT1G79830 // AT1G68590 // AT4G00585 // AT5G08050 // AT5G45550 // AT1G32990 // AT3G54920 // AT1G20110 // AT1G75460 // AT2G38140 // AT1G06950 // AT5G43750 // AT3G18035 // AT5G50250 // AT4G32260 // AT5G38720 // AT3G17210 // AT2G43090 // AT1G54…	Exist
GO:0009628	P	response to abiotic stimulus	63	303	2635	28397	1.4e-09	5.4e-08	// AT1G54990 // AT2G22230 // AT1G76490 // AT3G47520 // AT3G22890 // AT4G38680 // AT2G23810 // AT5G49910 // AT5G12860 // AT5G45550 // AT4G25130 // AT2G37220 // AT3G58610 // AT3G54920 // AT5G27470 // AT2G18960 // AT5G50250 // AT4G32260 // AT5G14740 // AT3G17210 // AT2G47730 // AT3G25770 // AT1G54780 // AT4G01070 // AT3G55800 // AT1G01610 // AT5G06290 // AT5G42270 // AT3G46970 // AT4G19120 // AT5G19…	Exist
GO:0051234	P	establishment of localization	78	303	3652	28397	1.5e-09	5.9e-08	// AT3G22120 // AT3G54660 // AT5G45390 // AT1G54990 // AT4G32260 // AT1G76100 // AT1G76490 // AT5G64290 // AT3G22890 // AT3G51820 // AT5G62350 // AT1G79830 // AT5G49910 // AT5G45550 // AT4G38920 // AT5G19590 // AT5G38720 // AT3G26740 // AT5G12860 // AT4G00895 // AT1G20110 // AT5G57180 // AT5G43750 // AT3G25410 // AT2G18960 // AT3G46740 // AT1G19770 // AT1G11310 // AT5G14740 // AT5G20650 // AT2G43…	Exist
GO:0006950	P	response to stress	84	303	4089	28397	1.8e-09	6.8e-08	// AT3G11660 // AT4G00430 // AT2G23810 // AT2G22230 // AT1G76490 // AT3G58120 // AT3G47520 // AT3G22890 // AT1G60870 // AT4G38680 // AT3G23400 // AT1G17290 // AT5G11770 // AT4G00585 // AT5G12860 // AT5G45550 // AT4G25130 // AT3G23700 // AT3G58610 // AT4G35630 // AT1G51680 // AT4G19120 // AT5G43750 // AT5G27470 // AT2G18960 // AT2G37220 // AT5G50250 // AT4G32260 // AT5G14740 // AT3G17210 // AT2G47…	Exist
GO:0015995	P	chlorophyll biosynthetic process	13	303	125	28397	2.8e-09	1.1e-07	// AT4G09010 // AT1G76450 // AT5G18660 // AT3G17210 // AT3G26060 // AT3G51820 // AT1G54780 // AT5G08050 // AT3G23700 // AT1G32990 // AT3G53130 // AT5G08280 // AT2G20860	Exist
GO:0000096	P	sulfur amino acid metabolic process	23	303	465	28397	2.9e-09	1.1e-07	// AT2G22230 // AT1G31330 // AT2G05920 // AT1G42960 // AT3G51820 // AT1G17290 // AT2G31670 // AT5G18660 // AT2G23810 // AT3G26060 // AT2G20860 // AT1G66430 // AT1G54780 // AT3G55800 // AT1G55670 // AT1G67740 // AT1G32060 // AT4G01900 // AT2G43100 // AT1G76100 // AT1G20340 // AT1G56190 // AT5G08280	NA
GO:0044238	P	primary metabolic process	176	303	11717	28397	3.3e-09	1.2e-07	// AT3G54660 // AT2G30570 // AT5G05200 // AT2G22230 // AT1G75690 // AT1G76490 // AT3G47520 // AT3G51820 // AT1G76880 // AT5G08050 // AT4G24620 // AT2G20860 // AT4G00895 // AT5G57180 // AT1G18500 // AT3G14240 // AT5G50250 // AT1G08200 // AT2G47730 // AT2G43090 // AT1G61740 // AT5G62220 // AT4G09040 // AT1G07110 // AT5G35100 // AT3G07430 // AT3G53890 // AT2G43800 // AT2G02390 // AT1G14345 // AT1G66…	Exist
GO:0042742	P	defense response to bacterium	21	303	394	28397	4.2e-09	1.5e-07	// AT3G29320 // AT3G01500 // AT3G54640 // AT4G32260 // AT3G52960 // AT3G22890 // AT3G27850 // AT1G32060 // AT5G50250 // AT3G23400 // AT5G14740 // AT3G17210 // AT2G47730 // AT2G33800 // AT1G11310 // AT3G55800 // AT3G23700 // AT1G16880 // AT2G37220 // AT5G08280 // AT5G06290	Exist
GO:0006779	P	porphyrin biosynthetic process	14	303	157	28397	4.4e-09	1.6e-07	// AT2G26540 // AT4G09010 // AT1G76450 // AT5G18660 // AT3G17210 // AT3G26060 // AT3G51820 // AT1G54780 // AT5G08050 // AT3G23700 // AT1G32990 // AT3G53130 // AT5G08280 // AT2G20860	Exist
GO:0006364	P	rRNA processing	19	303	324	28397	5.4e-09	1.9e-07	// AT2G30570 // AT3G53890 // AT4G32260 // AT1G75690 // AT1G67740 // AT3G51820 // AT1G32060 // AT5G18660 // AT3G26060 // AT1G76450 // AT1G54780 // AT5G45390 // AT3G55800 // AT3G23700 // AT1G32990 // AT5G58330 // AT2G39140 // AT5G08280 // AT4G09010	NA
GO:0033014	P	tetrapyrrole biosynthetic process	14	303	160	28397	5.5e-09	1.9e-07	// AT2G26540 // AT4G09010 // AT1G76450 // AT5G18660 // AT3G17210 // AT3G26060 // AT3G51820 // AT1G54780 // AT5G08050 // AT3G23700 // AT1G32990 // AT3G53130 // AT5G08280 // AT2G20860	Exist
GO:0016072	P	rRNA metabolic process	19	303	325	28397	5.7e-09	2e-07	// AT2G30570 // AT3G53890 // AT4G32260 // AT1G75690 // AT1G67740 // AT3G51820 // AT1G32060 // AT5G18660 // AT3G26060 // AT1G76450 // AT1G54780 // AT5G45390 // AT3G55800 // AT3G23700 // AT1G32990 // AT5G58330 // AT2G39140 // AT5G08280 // AT4G09010	NA
GO:0019252	P	starch biosynthetic process	15	303	191	28397	6.1e-09	2.1e-07	// AT3G46970 // AT2G35960 // AT3G51510 // AT5G28500 // AT5G05200 // AT2G47590 // AT3G55250 // AT1G76450 // AT5G58330 // AT5G50250 // AT3G29320 // AT1G56190 // AT3G55800 // AT4G24620 // AT4G09010	NA
GO:0009617	P	response to bacterium	25	303	577	28397	7.5e-09	2.6e-07	// AT4G32260 // AT3G54640 // AT3G23400 // AT2G37220 // AT5G50250 // AT5G14740 // AT2G47730 // AT3G55800 // AT5G05190 // AT1G75460 // AT3G52960 // AT3G27850 // AT3G22890 // AT3G01500 // AT1G69690 // AT2G33800 // AT3G23700 // AT1G32060 // AT5G06290 // AT1G11310 // AT3G28040 // AT3G29320 // AT3G17210 // AT1G16880 // AT5G08280	Exist
GO:0005982	P	starch metabolic process	16	303	230	28397	9.5e-09	3.3e-07	// AT3G46970 // AT2G35960 // AT3G51510 // AT5G28500 // AT5G05200 // AT2G22230 // AT3G55250 // AT1G76450 // AT5G58330 // AT5G50250 // AT2G47590 // AT3G29320 // AT1G56190 // AT3G55800 // AT4G24620 // AT4G09010	Exist
GO:0051179	P	localization	78	303	3819	28397	1.1e-08	3.7e-07	// AT3G22120 // AT3G54660 // AT5G45390 // AT1G54990 // AT4G32260 // AT1G76100 // AT1G76490 // AT5G64290 // AT3G22890 // AT3G51820 // AT5G62350 // AT1G79830 // AT5G49910 // AT5G45550 // AT4G38920 // AT5G19590 // AT5G38720 // AT3G26740 // AT5G12860 // AT4G00895 // AT1G20110 // AT5G57180 // AT5G43750 // AT3G25410 // AT2G18960 // AT3G46740 // AT1G19770 // AT1G11310 // AT5G14740 // AT5G20650 // AT2G43…	Exist
GO:0044085	P	cellular component biogenesis	42	303	1480	28397	1.3e-08	4.3e-07	// AT2G30570 // AT2G39140 // AT5G45390 // AT2G22230 // AT1G75690 // AT2G05920 // AT1G17440 // AT3G51820 // AT5G58330 // AT5G18660 // AT3G26060 // AT4G00585 // AT1G32990 // AT5G06700 // AT3G18035 // AT4G32260 // AT1G54780 // AT1G14345 // AT3G55800 // AT2G45470 // AT2G32480 // AT3G06550 // AT5G52780 // AT3G53890 // AT1G75460 // AT5G11770 // AT2G02390 // AT1G67740 // AT1G32060 // AT1G21310 // AT5G47…	Exist
GO:0006810	P	transport	74	303	3577	28397	1.8e-08	5.9e-07	// AT3G22120 // AT3G54660 // AT1G54990 // AT4G32260 // AT1G76100 // AT1G76490 // AT5G64290 // AT3G22890 // AT4G26670 // AT5G62350 // AT1G79830 // AT5G49910 // AT5G45550 // AT4G38920 // AT5G19590 // AT5G38720 // AT3G26740 // AT4G00895 // AT1G20110 // AT5G57180 // AT5G43750 // AT3G25410 // AT2G18960 // AT3G46740 // AT1G19770 // AT1G11310 // AT5G14740 // AT5G20650 // AT2G43090 // AT1G61740 // AT4G01…	Exist
GO:0006996	P	organelle organization	51	303	2044	28397	1.9e-08	6.1e-07	// AT3G54660 // AT2G30570 // AT4G32260 // AT1G75690 // AT1G76490 // AT3G22890 // AT3G51820 // AT5G58330 // AT5G62350 // AT3G23400 // AT1G68590 // AT2G39140 // AT5G08050 // AT5G45550 // AT1G32990 // AT5G19590 // AT5G43750 // AT3G18035 // AT5G50250 // AT2G38140 // AT5G38720 // AT3G17210 // AT2G43090 // AT1G54780 // AT3G55800 // AT2G32480 // AT5G06290 // AT3G07430 // AT3G19170 // AT2G43800 // AT1G06…	Exist
GO:0046148	P	pigment biosynthetic process	17	303	282	28397	2.4e-08	7.8e-07	// AT1G32990 // AT2G43800 // AT2G47590 // AT3G17210 // AT4G09010 // AT3G51820 // AT5G18660 // AT4G01900 // AT3G26060 // AT1G76450 // AT1G54780 // AT5G08050 // AT3G23700 // AT4G19170 // AT3G53130 // AT5G08280 // AT2G20860	Exist
GO:0018130	P	heterocycle biosynthetic process	16	303	258	28397	4.3e-08	1.4e-06	// AT2G26540 // AT4G09010 // AT3G54640 // AT1G76450 // AT3G57560 // AT5G18660 // AT3G17210 // AT3G26060 // AT3G51820 // AT1G54780 // AT5G08050 // AT3G23700 // AT1G32990 // AT3G53130 // AT5G08280 // AT2G20860	NA
GO:0022900	P	electron transport chain	12	303	133	28397	5e-08	1.6e-06	// AT5G66760 // AT5G11770 // AT1G76100 // AT4G04020 // AT3G55800 // AT5G42270 // AT1G54780 // AT5G08050 // AT3G15840 // AT1G55670 // AT3G23700 // AT1G32060	Exist
GO:0043623	P	cellular protein complex assembly	22	303	504	28397	5.4e-08	1.7e-06	// AT2G30570 // AT4G32260 // AT1G75690 // AT5G11770 // AT5G58330 // AT4G00585 // AT1G54780 // AT1G14345 // AT3G55800 // AT1G21310 // AT2G32480 // AT1G75460 // AT2G02390 // AT1G67740 // AT1G32060 // AT5G45390 // AT5G52780 // AT2G05710 // AT4G33480 // AT1G19740 // AT1G05140 // AT5G47030	Exist
GO:0044255	P	cellular lipid metabolic process	39	303	1395	28397	6.6e-08	2.1e-06	// AT2G22230 // AT1G76490 // AT3G51820 // AT5G18660 // AT1G68590 // AT1G67730 // AT3G53130 // AT1G32990 // AT5G19590 // AT2G20860 // AT4G24620 // AT5G43750 // AT5G50250 // AT3G17210 // AT3G25770 // AT1G54780 // AT1G14345 // AT3G55800 // AT1G65290 // AT4G20360 // AT1G01080 // AT2G02390 // AT1G74070 // AT5G45390 // AT3G23700 // AT4G01900 // AT5G43760 // AT5G16390 // AT1G44920 // AT2G47590 // AT1G01…	Exist
GO:0050896	P	response to stimulus	108	303	6292	28397	7.5e-08	2.3e-06	// AT3G11660 // AT2G22230 // AT1G76490 // AT3G47520 // AT5G50250 // AT2G47730 // AT2G43090 // AT1G61740 // AT5G06290 // AT3G06550 // AT5G05190 // AT2G43800 // AT1G49750 // AT2G02390 // AT4G12730 // AT1G69690 // AT3G16670 // AT4G04770 // AT1G77490 // AT2G47590 // AT5G14920 // AT2G05710 // AT1G20340 // AT1G19350 // AT4G26710 // AT3G17210 // AT1G56190 // AT5G08280 // AT1G23080 // AT4G32260 // AT5G64…	Exist
GO:0034470	P	ncRNA processing	19	303	387	28397	8e-08	2.5e-06	// AT2G30570 // AT3G53890 // AT4G32260 // AT1G75690 // AT1G67740 // AT3G51820 // AT1G32060 // AT5G18660 // AT3G26060 // AT1G76450 // AT1G54780 // AT5G45390 // AT3G55800 // AT3G23700 // AT1G32990 // AT5G58330 // AT2G39140 // AT5G08280 // AT4G09010	NA
GO:0051188	P	cofactor biosynthetic process	19	303	388	28397	8.3e-08	2.6e-06	// AT2G30200 // AT1G32990 // AT2G26540 // AT2G22230 // AT3G17210 // AT4G09010 // AT2G25830 // AT3G51820 // AT5G18660 // AT4G01900 // AT3G26060 // AT1G76450 // AT1G54780 // AT5G08050 // AT3G23700 // AT2G20860 // AT3G53130 // AT5G08280 // AT4G04770	Exist
GO:0009266	P	response to temperature stimulus	31	303	962	28397	8.6e-08	2.6e-06	// AT4G32260 // AT3G47520 // AT3G22890 // AT4G38680 // AT5G49910 // AT2G37220 // AT5G50250 // AT5G14740 // AT3G17210 // AT2G47730 // AT3G25770 // AT3G55800 // AT5G06290 // AT2G43090 // AT4G19120 // AT5G47030 // AT1G32060 // AT3G01500 // AT2G33800 // AT3G23700 // AT4G01900 // AT5G43760 // AT1G77490 // AT2G05710 // AT4G04020 // AT3G29320 // AT5G46290 // AT1G65290 // AT5G62350 // AT1G16880 // AT5G08…	Exist
GO:0006629	P	lipid metabolic process	45	303	1772	28397	8.9e-08	2.7e-06	// AT2G22230 // AT1G76490 // AT3G51820 // AT5G18660 // AT1G68590 // AT1G67730 // AT3G53130 // AT1G32990 // AT5G19590 // AT2G20860 // AT4G24620 // AT5G43750 // AT5G50250 // AT3G17210 // AT3G25770 // AT1G54780 // AT1G14345 // AT3G55800 // AT1G65290 // AT4G20360 // AT5G43760 // AT1G01080 // AT2G02390 // AT1G74070 // AT1G66970 // AT4G12730 // AT5G45390 // AT5G12860 // AT3G23700 // AT3G28200 // AT4G01…	NA
GO:0044042	P	glucan metabolic process	20	303	432	28397	9e-08	2.7e-06	// AT3G46970 // AT2G35960 // AT3G51510 // AT5G28500 // AT5G05200 // AT2G22230 // AT5G06700 // AT3G55250 // AT1G76450 // AT5G58330 // AT5G50250 // AT2G47590 // AT3G29320 // AT4G09010 // AT1G56190 // AT5G62220 // AT3G55800 // AT5G12860 // AT4G24620 // AT3G22960	NA
GO:0009250	P	glucan biosynthetic process	17	303	313	28397	1e-07	3e-06	// AT3G46970 // AT2G35960 // AT3G51510 // AT5G28500 // AT5G05200 // AT2G47590 // AT5G06700 // AT3G55250 // AT1G76450 // AT5G58330 // AT5G50250 // AT5G62220 // AT3G29320 // AT1G56190 // AT3G55800 // AT4G24620 // AT4G09010	NA
GO:0009082	P	branched chain family amino acid biosynthetic process	6	303	17	28397	1.1e-07	3.4e-06	// AT3G58990 // AT2G43100 // AT1G18500 // AT3G48560 // AT2G43090 // AT3G58610	NA
GO:0070271	P	protein complex biogenesis	23	303	577	28397	1.3e-07	3.7e-06	// AT2G30570 // AT4G32260 // AT1G75690 // AT5G11770 // AT5G58330 // AT4G00585 // AT1G17440 // AT1G54780 // AT1G14345 // AT3G55800 // AT1G21310 // AT2G32480 // AT1G75460 // AT2G02390 // AT1G67740 // AT1G32060 // AT5G45390 // AT5G52780 // AT2G05710 // AT4G33480 // AT1G19740 // AT1G05140 // AT5G47030	Exist
GO:0006461	P	protein complex assembly	23	303	577	28397	1.3e-07	3.7e-06	// AT2G30570 // AT4G32260 // AT1G75690 // AT5G11770 // AT5G58330 // AT4G00585 // AT1G17440 // AT1G54780 // AT1G14345 // AT3G55800 // AT1G21310 // AT2G32480 // AT1G75460 // AT2G02390 // AT1G67740 // AT1G32060 // AT5G45390 // AT5G52780 // AT2G05710 // AT4G33480 // AT1G19740 // AT1G05140 // AT5G47030	Exist
GO:0009409	P	response to cold	24	303	629	28397	1.5e-07	4.2e-06	// AT4G32260 // AT3G47520 // AT4G38680 // AT2G37220 // AT5G50250 // AT5G14740 // AT2G47730 // AT3G25770 // AT3G55800 // AT4G01900 // AT4G19120 // AT1G32060 // AT3G01500 // AT2G33800 // AT3G23700 // AT5G06290 // AT5G43760 // AT1G77490 // AT4G04020 // AT3G29320 // AT5G46290 // AT1G65290 // AT1G16880 // AT5G08280	Exist
GO:0009607	P	response to biotic stimulus	43	303	1687	28397	1.6e-07	4.6e-06	// AT3G11660 // AT2G22230 // AT5G64290 // AT5G11770 // AT3G22890 // AT3G23400 // AT2G23810 // AT4G00585 // AT3G54920 // AT2G37220 // AT4G35630 // AT5G50250 // AT4G32260 // AT5G14740 // AT2G47730 // AT3G55800 // AT1G31130 // AT1G16410 // AT3G06550 // AT5G05190 // AT1G75460 // AT2G02390 // AT3G52960 // AT5G47030 // AT3G27850 // AT1G32060 // AT3G01500 // AT1G69690 // AT2G33800 // AT1G21310 // AT3G58…	NA
GO:0000271	P	polysaccharide biosynthetic process	23	303	590	28397	1.9e-07	5.3e-06	// AT3G51510 // AT5G05200 // AT2G22230 // AT5G58330 // AT4G24620 // AT3G54920 // AT5G50250 // AT2G35960 // AT5G62220 // AT4G09010 // AT3G46970 // AT5G06700 // AT3G55250 // AT3G55800 // AT5G16390 // AT2G47590 // AT1G01610 // AT1G20340 // AT1G76450 // AT3G29320 // AT1G56190 // AT5G28500 // AT1G23080	NA
GO:0000023	P	maltose metabolic process	12	303	152	28397	1.9e-07	5.5e-06	// AT2G35960 // AT3G51510 // AT5G28500 // AT5G05200 // AT2G47590 // AT3G55250 // AT1G76450 // AT5G58330 // AT5G50250 // AT1G56190 // AT3G55800 // AT4G24620	NA
GO:0009773	P	photosynthetic electron transport in photosystem I	8	303	51	28397	2e-07	5.5e-06	// AT1G76100 // AT1G32060 // AT5G42270 // AT1G54780 // AT5G08050 // AT3G55800 // AT1G55670 // AT3G23700	NA
GO:0034622	P	cellular macromolecular complex assembly	23	303	592	28397	2e-07	5.5e-06	// AT2G30570 // AT4G32260 // AT1G75690 // AT5G11770 // AT5G58330 // AT4G00585 // AT3G18035 // AT1G54780 // AT1G14345 // AT3G55800 // AT1G21310 // AT2G32480 // AT1G75460 // AT2G02390 // AT1G67740 // AT1G32060 // AT5G45390 // AT5G52780 // AT2G05710 // AT4G33480 // AT1G19740 // AT1G05140 // AT5G47030	Exist
GO:0005976	P	polysaccharide metabolic process	25	303	712	28397	3.6e-07	9.9e-06	// AT3G51510 // AT5G05200 // AT2G22230 // AT5G58330 // AT4G24620 // AT3G54920 // AT5G50250 // AT2G35960 // AT5G62220 // AT4G09010 // AT3G46970 // AT5G06700 // AT3G55250 // AT3G55800 // AT5G12860 // AT5G16390 // AT3G22960 // AT2G47590 // AT1G01610 // AT1G20340 // AT1G76450 // AT3G29320 // AT1G56190 // AT5G28500 // AT1G23080	NA
GO:0006073	P	cellular glucan metabolic process	18	303	388	28397	3.9e-07	1.1e-05	// AT3G46970 // AT2G35960 // AT3G51510 // AT5G28500 // AT5G05200 // AT2G22230 // AT5G06700 // AT3G55250 // AT1G76450 // AT5G58330 // AT5G50250 // AT2G47590 // AT3G29320 // AT1G56190 // AT5G62220 // AT3G55800 // AT4G24620 // AT4G09010	NA
GO:0065003	P	macromolecular complex assembly	24	303	665	28397	3.9e-07	1.1e-05	// AT2G30570 // AT4G32260 // AT1G75690 // AT5G11770 // AT5G58330 // AT4G00585 // AT1G17440 // AT3G18035 // AT1G54780 // AT1G14345 // AT3G55800 // AT1G21310 // AT2G32480 // AT1G75460 // AT2G02390 // AT1G67740 // AT1G32060 // AT5G45390 // AT5G52780 // AT2G05710 // AT4G33480 // AT1G19740 // AT1G05140 // AT5G47030	Exist
GO:0034621	P	cellular macromolecular complex subunit organization	23	303	617	28397	4e-07	1.1e-05	// AT2G30570 // AT4G32260 // AT1G75690 // AT5G11770 // AT5G58330 // AT4G00585 // AT3G18035 // AT1G54780 // AT1G14345 // AT3G55800 // AT1G21310 // AT2G32480 // AT1G75460 // AT2G02390 // AT1G67740 // AT1G32060 // AT5G45390 // AT5G52780 // AT2G05710 // AT4G33480 // AT1G19740 // AT1G05140 // AT5G47030	NA
GO:0009767	P	photosynthetic electron transport chain	9	303	80	28397	4.4e-07	1.2e-05	// AT1G76100 // AT4G04020 // AT5G42270 // AT1G54780 // AT5G08050 // AT3G55800 // AT1G55670 // AT3G23700 // AT1G32060	NA
GO:0034660	P	ncRNA metabolic process	20	303	481	28397	4.6e-07	1.2e-05	// AT2G30570 // AT3G53890 // AT4G32260 // AT1G75690 // AT5G27470 // AT1G67740 // AT3G51820 // AT1G32060 // AT5G18660 // AT3G26060 // AT1G76450 // AT1G54780 // AT5G45390 // AT3G55800 // AT3G23700 // AT1G32990 // AT5G58330 // AT2G39140 // AT5G08280 // AT4G09010	NA
GO:0042254	P	ribosome biogenesis	19	303	437	28397	4.7e-07	1.2e-05	// AT2G30570 // AT3G53890 // AT4G32260 // AT1G75690 // AT1G67740 // AT3G51820 // AT1G32060 // AT5G18660 // AT3G26060 // AT1G76450 // AT1G54780 // AT5G45390 // AT3G55800 // AT3G23700 // AT1G32990 // AT5G58330 // AT2G39140 // AT5G08280 // AT4G09010	Exist
GO:0009658	P	chloroplast organization	14	303	237	28397	5.3e-07	1.4e-05	// AT3G54660 // AT3G19170 // AT5G45390 // AT1G06950 // AT1G76450 // AT1G32060 // AT3G23400 // AT5G46290 // AT3G51820 // AT5G08050 // AT3G23700 // AT3G46740 // AT2G32480 // AT3G07430	Exist
GO:0042221	P	response to chemical stimulus	75	303	3978	28397	5.7e-07	1.5e-05	// AT1G54990 // AT4G32260 // AT1G17440 // AT3G22890 // AT1G60870 // AT4G38680 // AT3G23400 // AT1G17290 // AT5G11770 // AT4G00585 // AT4G25130 // AT2G37220 // AT3G58610 // AT3G22960 // AT1G75460 // AT5G43750 // AT5G27470 // AT2G18960 // AT5G19250 // AT3G58120 // AT2G46505 // AT5G14740 // AT5G20650 // AT2G23810 // AT2G43090 // AT5G42130 // AT4G01070 // AT3G55800 // AT1G21310 // AT2G38330 // AT4G01…	Exist
GO:0019438	P	aromatic compound biosynthetic process	24	303	680	28397	5.7e-07	1.5e-05	// AT4G32260 // AT1G76490 // AT3G54640 // AT3G51820 // AT5G18660 // AT4G19170 // AT2G37220 // AT2G20860 // AT2G26540 // AT5G50250 // AT5G14740 // AT1G61740 // AT2G25830 // AT3G55800 // AT4G01900 // AT2G43800 // AT4G01070 // AT1G32060 // AT3G01500 // AT5G06290 // AT1G51680 // AT1G11310 // AT1G17290 // AT5G08280	NA
GO:0006807	P	nitrogen compound metabolic process	97	303	5675	28397	6.3e-07	1.6e-05	// AT2G30570 // AT5G05200 // AT2G22230 // AT1G75690 // AT1G76490 // AT3G51820 // AT1G76880 // AT5G08050 // AT2G20860 // AT4G00895 // AT5G57180 // AT1G18500 // AT5G50250 // AT1G08200 // AT2G43090 // AT1G54780 // AT4G09040 // AT3G20810 // AT3G07430 // AT3G53890 // AT3G51950 // AT1G69690 // AT2G47590 // AT5G09330 // AT1G20340 // AT1G19350 // AT3G17210 // AT1G56190 // AT5G28500 // AT5G08280 // AT5G48…	Exist
GO:0022613	P	ribonucleoprotein complex biogenesis	19	303	447	28397	6.5e-07	1.7e-05	// AT2G30570 // AT3G53890 // AT4G32260 // AT1G75690 // AT1G67740 // AT3G51820 // AT1G32060 // AT5G18660 // AT3G26060 // AT1G76450 // AT1G54780 // AT5G45390 // AT3G55800 // AT3G23700 // AT1G32990 // AT5G58330 // AT2G39140 // AT5G08280 // AT4G09010	Exist
GO:0043933	P	macromolecular complex subunit organization	24	303	691	28397	7.5e-07	1.9e-05	// AT2G30570 // AT4G32260 // AT1G75690 // AT5G11770 // AT5G58330 // AT4G00585 // AT1G17440 // AT3G18035 // AT1G54780 // AT1G14345 // AT3G55800 // AT1G21310 // AT2G32480 // AT1G75460 // AT2G02390 // AT1G67740 // AT1G32060 // AT5G45390 // AT5G52780 // AT2G05710 // AT4G33480 // AT1G19740 // AT1G05140 // AT5G47030	Exist
GO:0010103	P	stomatal complex morphogenesis	11	303	149	28397	1.2e-06	2.9e-05	// AT3G04760 // AT1G01080 // AT3G15520 // AT1G32060 // AT3G28040 // AT1G68590 // AT4G09010 // AT4G24930 // AT3G55800 // AT3G53130 // AT5G28500	NA
GO:0005984	P	disaccharide metabolic process	13	303	221	28397	1.4e-06	3.5e-05	// AT2G35960 // AT3G51510 // AT5G28500 // AT5G05200 // AT2G47590 // AT3G55250 // AT1G76450 // AT5G58330 // AT5G50250 // AT1G56190 // AT3G55800 // AT4G24620 // AT1G66430	NA
GO:0006833	P	water transport	11	303	155	28397	1.7e-06	4.1e-05	// AT5G19250 // AT2G05710 // AT5G47030 // AT3G22890 // AT5G62350 // AT3G17210 // AT2G43090 // AT4G00430 // AT5G12860 // AT1G16880 // AT5G06290	NA
GO:0042044	P	fluid transport	11	303	155	28397	1.7e-06	4.1e-05	// AT5G19250 // AT2G05710 // AT5G47030 // AT3G22890 // AT5G62350 // AT3G17210 // AT2G43090 // AT4G00430 // AT5G12860 // AT1G16880 // AT5G06290	NA
GO:0051707	P	response to other organism	36	303	1421	28397	2.1e-06	5.1e-05	// AT3G11660 // AT2G22230 // AT5G64290 // AT3G22890 // AT3G23400 // AT2G23810 // AT3G54920 // AT2G37220 // AT4G35630 // AT5G50250 // AT4G32260 // AT5G14740 // AT2G47730 // AT3G55800 // AT1G31130 // AT1G16410 // AT3G06550 // AT5G05190 // AT1G75460 // AT3G52960 // AT3G27850 // AT1G32060 // AT3G01500 // AT1G69690 // AT2G33800 // AT5G12860 // AT3G23700 // AT5G06290 // AT1G51680 // AT1G11310 // AT3G28…	NA
GO:0070838	P	divalent metal ion transport	12	303	195	28397	2.3e-06	5.6e-05	// AT3G26740 // AT5G19250 // AT5G43750 // AT1G76490 // AT1G76100 // AT4G26710 // AT1G56190 // AT1G55670 // AT4G12730 // AT5G45550 // AT1G16880 // AT4G01900	NA
GO:0006605	P	protein targeting	27	303	906	28397	2.6e-06	6.2e-05	// AT3G54660 // AT4G32260 // AT3G54640 // AT5G49910 // AT5G19590 // AT1G20110 // AT5G57180 // AT5G38720 // AT3G46740 // AT5G14740 // AT1G61740 // AT4G01070 // AT3G55800 // AT1G75460 // AT2G25970 // AT1G06950 // AT1G32060 // AT3G01500 // AT1G69690 // AT2G33800 // AT5G06290 // AT2G15290 // AT1G51680 // AT1G11310 // AT4G26710 // AT1G04790 // AT1G65720	Exist
GO:0009081	P	branched chain family amino acid metabolic process	6	303	33	28397	3.2e-06	7.7e-05	// AT3G58990 // AT2G43100 // AT1G18500 // AT3G48560 // AT2G43090 // AT3G58610	Exist
GO:0035304	P	regulation of protein amino acid dephosphorylation	10	303	135	28397	3.5e-06	8.3e-05	// AT1G76100 // AT1G75460 // AT4G32260 // AT1G75690 // AT1G67740 // AT1G32060 // AT1G69690 // AT1G54780 // AT5G45390 // AT3G55800	NA
GO:0006812	P	cation transport	25	303	813	28397	3.6e-06	8.5e-05	// AT4G32260 // AT1G76490 // AT4G38920 // AT5G45550 // AT3G26740 // AT4G00895 // AT5G43750 // AT3G25410 // AT2G18960 // AT5G42130 // AT4G12730 // AT1G55670 // AT5G19250 // AT5G47030 // AT5G64280 // AT4G00430 // AT5G52780 // AT4G01900 // AT5G44680 // AT1G76100 // AT1G20340 // AT4G26710 // AT5G20650 // AT1G56190 // AT1G16880	Exist
GO:0018198	P	peptidyl-cysteine modification	5	303	18	28397	3.7e-06	8.6e-05	// AT3G52960 // AT4G20360 // AT5G35100 // AT5G08280 // AT1G32060	NA
GO:0035303	P	regulation of dephosphorylation	10	303	137	28397	3.9e-06	9.2e-05	// AT1G76100 // AT1G75460 // AT4G32260 // AT1G75690 // AT1G67740 // AT1G32060 // AT1G69690 // AT1G54780 // AT5G45390 // AT3G55800	NA
GO:0009311	P	oligosaccharide metabolic process	13	303	244	28397	4e-06	9.2e-05	// AT2G35960 // AT3G51510 // AT5G28500 // AT5G05200 // AT2G47590 // AT3G55250 // AT1G76450 // AT5G58330 // AT5G50250 // AT1G56190 // AT3G55800 // AT4G24620 // AT1G66430	NA
GO:0010038	P	response to metal ion	21	303	610	28397	4.3e-06	9.9e-05	// AT3G46970 // AT3G19170 // AT3G22960 // AT2G33800 // AT5G49910 // AT5G47030 // AT5G27470 // AT2G05710 // AT1G20340 // AT3G22890 // AT5G62350 // AT2G46505 // AT1G17290 // AT2G23350 // AT1G56190 // AT5G42130 // AT3G17210 // AT1G16890 // AT2G43090 // AT3G58610 // AT4G04770	Exist
GO:0046686	P	response to cadmium ion	18	303	470	28397	5.2e-06	0.00012	// AT3G46970 // AT3G19170 // AT3G22960 // AT2G33800 // AT5G49910 // AT5G47030 // AT5G27470 // AT2G05710 // AT3G22890 // AT1G20340 // AT5G62350 // AT2G46505 // AT1G17290 // AT2G23350 // AT1G56190 // AT2G43090 // AT3G58610 // AT3G17210	Exist
GO:0043467	P	regulation of generation of precursor metabolites and energy	5	303	20	28397	5.7e-06	0.00013	// AT4G38680 // AT1G55670 // AT2G30570 // AT5G42270 // AT4G04020	NA
GO:0007030	P	Golgi organization	11	303	178	28397	5.9e-06	0.00013	// AT5G47030 // AT1G76490 // AT2G05710 // AT3G22890 // AT5G62350 // AT4G26710 // AT3G17210 // AT2G43090 // AT4G12730 // AT5G45550 // AT4G01900	NA
GO:0006096	P	glycolysis	12	303	219	28397	7.1e-06	0.00016	// AT3G22960 // AT5G47030 // AT5G27470 // AT2G05710 // AT3G22890 // AT5G62350 // AT2G46505 // AT3G17210 // AT1G56190 // AT4G24620 // AT3G58610 // AT2G43090	Exist
GO:0006811	P	ion transport	28	303	1019	28397	7.3e-06	0.00016	// AT4G32260 // AT1G76490 // AT5G64290 // AT4G38920 // AT5G45550 // AT3G26740 // AT4G00895 // AT5G43750 // AT3G25410 // AT2G18960 // AT5G42130 // AT4G12730 // AT1G55670 // AT5G19250 // AT5G47030 // AT5G64280 // AT4G00430 // AT5G52780 // AT5G12860 // AT4G01900 // AT5G44680 // AT1G76100 // AT1G20340 // AT5G33320 // AT4G26710 // AT5G20650 // AT1G56190 // AT1G16880	Exist
GO:0031399	P	regulation of protein modification process	10	303	150	28397	8.4e-06	0.00019	// AT1G76100 // AT1G75460 // AT4G32260 // AT1G75690 // AT1G67740 // AT1G32060 // AT1G69690 // AT1G54780 // AT5G45390 // AT3G55800	NA
GO:0015674	P	di-, tri-valent inorganic cation transport	14	303	321	28397	1.5e-05	0.00033	// AT3G26740 // AT5G19250 // AT5G43750 // AT1G76490 // AT1G76100 // AT4G26710 // AT1G56190 // AT5G42130 // AT1G55670 // AT4G12730 // AT5G45550 // AT4G00430 // AT1G16880 // AT4G01900	NA
GO:0010027	P	thylakoid membrane organization	11	303	198	28397	1.5e-05	0.00033	// AT1G77490 // AT1G44920 // AT5G43750 // AT3G55250 // AT1G76450 // AT5G50250 // AT3G51820 // AT5G45390 // AT3G23700 // AT1G32990 // AT5G06290	Exist
GO:0009668	P	plastid membrane organization	11	303	198	28397	1.5e-05	0.00033	// AT1G77490 // AT1G44920 // AT5G43750 // AT3G55250 // AT1G76450 // AT5G50250 // AT3G51820 // AT5G45390 // AT3G23700 // AT1G32990 // AT5G06290	Exist
GO:0022607	P	cellular component assembly	24	303	832	28397	1.6e-05	0.00034	// AT2G30570 // AT4G32260 // AT1G75690 // AT5G11770 // AT5G58330 // AT4G00585 // AT1G17440 // AT3G18035 // AT1G54780 // AT1G14345 // AT3G55800 // AT1G21310 // AT2G32480 // AT1G75460 // AT2G02390 // AT1G67740 // AT1G32060 // AT5G45390 // AT5G52780 // AT2G05710 // AT4G33480 // AT1G19740 // AT1G05140 // AT5G47030	Exist
GO:0050801	P	ion homeostasis	12	303	240	28397	1.7e-05	0.00037	// AT3G26740 // AT5G19250 // AT2G15290 // AT1G66970 // AT2G05710 // AT1G20340 // AT1G76100 // AT1G56190 // AT5G43750 // AT1G55670 // AT1G16880 // AT4G04770	NA
GO:0006725	P	cellular aromatic compound metabolic process	27	303	1022	28397	2.1e-05	0.00045	// AT4G32260 // AT1G76490 // AT3G22890 // AT3G51820 // AT5G19240 // AT5G18660 // AT4G19170 // AT2G37220 // AT2G20860 // AT2G26540 // AT5G50250 // AT5G14740 // AT1G61740 // AT2G25830 // AT3G55800 // AT4G01900 // AT2G43800 // AT4G01070 // AT1G32060 // AT3G01500 // AT5G06290 // AT2G43100 // AT1G51680 // AT1G11310 // AT1G17290 // AT3G54640 // AT5G08280	NA
GO:0042335	P	cuticle development	6	303	48	28397	2.2e-05	0.00048	// AT5G43760 // AT1G01610 // AT5G46290 // AT1G65290 // AT1G67730 // AT4G20360	NA
GO:0042743	P	hydrogen peroxide metabolic process	14	303	335	28397	2.4e-05	0.0005	// AT3G19170 // AT1G75460 // AT4G32260 // AT1G11310 // AT1G20340 // AT1G60870 // AT3G01500 // AT5G14740 // AT1G69690 // AT3G54640 // AT3G55800 // AT4G35800 // AT1G32060 // AT5G06290	NA
GO:0000165	P	MAPKKK cascade	11	303	209	28397	2.4e-05	0.00051	// AT1G75460 // AT4G32260 // AT1G11310 // AT3G54640 // AT1G32060 // AT3G01500 // AT5G14740 // AT1G69690 // AT3G55800 // AT1G31130 // AT5G06290	NA
GO:0009697	P	salicylic acid biosynthetic process	11	303	209	28397	2.4e-05	0.00051	// AT3G01500 // AT4G32260 // AT1G11310 // AT3G54640 // AT1G32060 // AT5G50250 // AT5G14740 // AT3G55800 // AT2G37220 // AT5G08280 // AT5G06290	NA
GO:0010016	P	shoot morphogenesis	18	303	529	28397	2.4e-05	0.00051	// AT1G01080 // AT1G32060 // AT3G20680 // AT3G15520 // AT1G20340 // AT3G51820 // AT3G04760 // AT3G28040 // AT5G18660 // AT1G69690 // AT4G09010 // AT4G24930 // AT3G55800 // AT1G68590 // AT3G53130 // AT5G28500 // AT5G08280 // AT2G20860	NA
GO:0070727	P	cellular macromolecule localization	28	303	1093	28397	2.5e-05	0.00052	// AT3G22120 // AT3G54660 // AT4G32260 // AT3G54640 // AT5G49910 // AT5G19590 // AT1G20110 // AT5G57180 // AT5G38720 // AT3G46740 // AT5G14740 // AT1G61740 // AT4G01070 // AT3G55800 // AT1G75460 // AT2G25970 // AT1G06950 // AT1G32060 // AT3G01500 // AT1G69690 // AT2G33800 // AT5G06290 // AT2G15290 // AT1G51680 // AT1G11310 // AT4G26710 // AT1G04790 // AT1G65720	Exist
GO:0009595	P	detection of biotic stimulus	8	303	104	28397	2.6e-05	0.00054	// AT4G32260 // AT1G11310 // AT3G54640 // AT1G32060 // AT3G01500 // AT5G14740 // AT3G55800 // AT5G06290	NA
GO:0045184	P	establishment of protein localization	29	303	1160	28397	2.8e-05	0.00057	// AT3G54660 // AT4G32260 // AT4G26670 // AT3G54640 // AT5G49910 // AT5G19590 // AT1G20110 // AT5G57180 // AT5G38720 // AT3G46740 // AT5G14740 // AT1G61740 // AT4G01070 // AT3G55800 // AT5G28750 // AT2G25970 // AT1G06950 // AT1G32060 // AT3G01500 // AT1G69690 // AT2G33800 // AT5G06290 // AT2G15290 // AT1G51680 // AT1G11310 // AT1G75460 // AT4G26710 // AT1G04790 // AT1G65720	Exist
GO:0015031	P	protein transport	29	303	1160	28397	2.8e-05	0.00057	// AT3G54660 // AT4G32260 // AT4G26670 // AT3G54640 // AT5G49910 // AT5G19590 // AT1G20110 // AT5G57180 // AT5G38720 // AT3G46740 // AT5G14740 // AT1G61740 // AT4G01070 // AT3G55800 // AT5G28750 // AT2G25970 // AT1G06950 // AT1G32060 // AT3G01500 // AT1G69690 // AT2G33800 // AT5G06290 // AT2G15290 // AT1G51680 // AT1G11310 // AT1G75460 // AT4G26710 // AT1G04790 // AT1G65720	Exist
GO:0006886	P	intracellular protein transport	27	303	1044	28397	3e-05	0.00061	// AT3G54660 // AT4G32260 // AT3G54640 // AT5G49910 // AT5G19590 // AT1G20110 // AT5G57180 // AT5G38720 // AT3G46740 // AT5G14740 // AT1G61740 // AT4G01070 // AT3G55800 // AT1G75460 // AT2G25970 // AT1G06950 // AT1G32060 // AT3G01500 // AT1G69690 // AT2G33800 // AT5G06290 // AT2G15290 // AT1G51680 // AT1G11310 // AT4G26710 // AT1G04790 // AT1G65720	Exist
GO:0051641	P	cellular localization	36	303	1613	28397	3.1e-05	0.00063	// AT3G22120 // AT3G54660 // AT4G32260 // AT3G54640 // AT3G51820 // AT1G79830 // AT5G49910 // AT5G45550 // AT5G19590 // AT1G20110 // AT5G57180 // AT5G38720 // AT3G46740 // AT5G14740 // AT1G61740 // AT4G01070 // AT3G55800 // AT5G28750 // AT2G25970 // AT1G06950 // AT1G32060 // AT3G01500 // AT1G69690 // AT2G33800 // AT5G45390 // AT3G23700 // AT5G06290 // AT2G15290 // AT1G51680 // AT1G11310 // AT1G75…	Exist
GO:0032268	P	regulation of cellular protein metabolic process	11	303	215	28397	3.1e-05	0.00063	// AT1G76100 // AT1G75460 // AT4G32260 // AT1G75690 // AT1G67740 // AT1G20340 // AT1G32060 // AT1G69690 // AT1G54780 // AT5G45390 // AT3G55800	NA
GO:0051649	P	establishment of localization in cell	35	303	1554	28397	3.4e-05	0.00067	// AT3G54660 // AT4G32260 // AT3G54640 // AT3G51820 // AT1G79830 // AT5G49910 // AT5G45550 // AT5G19590 // AT1G20110 // AT5G57180 // AT5G38720 // AT3G46740 // AT5G14740 // AT1G61740 // AT4G01070 // AT3G55800 // AT5G28750 // AT2G25970 // AT1G06950 // AT1G32060 // AT3G01500 // AT1G69690 // AT2G33800 // AT5G45390 // AT3G23700 // AT5G06290 // AT2G15290 // AT1G51680 // AT1G11310 // AT1G75460 // AT1G76…	Exist
GO:0055080	P	cation homeostasis	11	303	217	28397	3.4e-05	0.00067	// AT3G26740 // AT5G19250 // AT2G15290 // AT5G43750 // AT2G05710 // AT1G20340 // AT1G76100 // AT1G56190 // AT1G55670 // AT1G16880 // AT4G04770	NA
GO:0010374	P	stomatal complex development	11	303	217	28397	3.4e-05	0.00067	// AT3G04760 // AT1G01080 // AT3G15520 // AT1G32060 // AT3G28040 // AT1G68590 // AT4G09010 // AT4G24930 // AT3G55800 // AT3G53130 // AT5G28500	NA
GO:0006800	P	oxygen and reactive oxygen species metabolic process	14	303	347	28397	3.4e-05	0.00067	// AT3G19170 // AT1G75460 // AT4G32260 // AT1G11310 // AT1G20340 // AT1G60870 // AT3G01500 // AT5G14740 // AT1G69690 // AT3G54640 // AT3G55800 // AT4G35800 // AT1G32060 // AT5G06290	NA
GO:0006633	P	fatty acid biosynthetic process	13	303	303	28397	3.6e-05	0.0007	// AT5G43760 // AT5G16390 // AT2G22230 // AT1G01610 // AT5G18660 // AT5G46290 // AT1G65290 // AT3G25770 // AT1G54780 // AT1G67730 // AT3G53130 // AT2G20860 // AT4G01900	Exist
GO:0034613	P	cellular protein localization	27	303	1059	28397	3.8e-05	0.00074	// AT3G54660 // AT4G32260 // AT3G54640 // AT5G49910 // AT5G19590 // AT1G20110 // AT5G57180 // AT5G38720 // AT3G46740 // AT5G14740 // AT1G61740 // AT4G01070 // AT3G55800 // AT1G75460 // AT2G25970 // AT1G06950 // AT1G32060 // AT3G01500 // AT1G69690 // AT2G33800 // AT5G06290 // AT2G15290 // AT1G51680 // AT1G11310 // AT4G26710 // AT1G04790 // AT1G65720	Exist
GO:0009696	P	salicylic acid metabolic process	11	303	222	28397	4.1e-05	0.0008	// AT3G01500 // AT4G32260 // AT1G11310 // AT3G54640 // AT1G32060 // AT5G50250 // AT5G14740 // AT3G55800 // AT2G37220 // AT5G08280 // AT5G06290	NA
GO:0007243	P	protein kinase cascade	11	303	223	28397	4.3e-05	0.00083	// AT1G75460 // AT4G32260 // AT1G11310 // AT3G54640 // AT1G32060 // AT3G01500 // AT5G14740 // AT1G69690 // AT3G55800 // AT1G31130 // AT5G06290	NA
GO:0015992	P	proton transport	9	303	147	28397	4.4e-05	0.00085	// AT4G00895 // AT4G32260 // AT5G44680 // AT5G47030 // AT1G20340 // AT2G18960 // AT4G26710 // AT5G52780 // AT4G38920	Exist
GO:0006818	P	hydrogen transport	9	303	147	28397	4.4e-05	0.00085	// AT4G00895 // AT4G32260 // AT5G44680 // AT5G47030 // AT1G20340 // AT2G18960 // AT4G26710 // AT5G52780 // AT4G38920	Exist
GO:0000038	P	very-long-chain fatty acid metabolic process	6	303	55	28397	4.5e-05	0.00085	// AT5G43760 // AT1G01610 // AT5G46290 // AT1G65290 // AT1G67730 // AT4G20360	NA
GO:0006873	P	cellular ion homeostasis	10	303	185	28397	4.6e-05	0.00087	// AT3G26740 // AT5G19250 // AT2G15290 // AT5G43750 // AT1G66970 // AT1G76100 // AT1G56190 // AT1G55670 // AT1G16880 // AT4G04770	NA
GO:0055082	P	cellular chemical homeostasis	10	303	186	28397	4.8e-05	0.00091	// AT3G26740 // AT5G19250 // AT2G15290 // AT5G43750 // AT1G66970 // AT1G76100 // AT1G56190 // AT1G55670 // AT1G16880 // AT4G04770	NA
GO:0010310	P	regulation of hydrogen peroxide metabolic process	10	303	187	28397	5e-05	0.00094	// AT1G75460 // AT4G32260 // AT1G11310 // AT3G54640 // AT1G32060 // AT3G01500 // AT5G14740 // AT1G69690 // AT3G55800 // AT5G06290	NA
GO:0080010	P	regulation of oxygen and reactive oxygen species metabolic process	10	303	188	28397	5.2e-05	0.00098	// AT1G75460 // AT4G32260 // AT1G11310 // AT3G54640 // AT1G32060 // AT3G01500 // AT5G14740 // AT1G69690 // AT3G55800 // AT5G06290	NA
GO:0065007	P	biological regulation	96	303	6222	28397	5.8e-05	0.0011	// AT3G54660 // AT2G30570 // AT5G05200 // AT2G22230 // AT1G75690 // AT1G76490 // AT3G51820 // AT1G76880 // AT5G08050 // AT4G24620 // AT2G20860 // AT3G26740 // AT5G57180 // AT3G14240 // AT1G61740 // AT1G07110 // AT2G28840 // AT4G18760 // AT1G66970 // AT4G12730 // AT3G51950 // AT1G69690 // AT5G64620 // AT4G04770 // AT3G08680 // AT1G77490 // AT2G15290 // AT5G09330 // AT5G38560 // AT1G20340 // AT1G19…	NA
GO:0006396	P	RNA processing	25	303	967	28397	6e-05	0.0011	// AT2G30570 // AT2G43970 // AT4G32260 // AT1G75690 // AT2G05920 // AT1G17440 // AT3G51820 // AT5G58330 // AT2G31670 // AT5G18660 // AT3G26060 // AT1G76450 // AT4G35800 // AT1G32990 // AT1G54780 // AT3G55800 // AT4G09040 // AT3G53890 // AT1G67740 // AT1G32060 // AT5G45390 // AT3G23700 // AT2G39140 // AT4G09010 // AT5G08280	NA
GO:0043900	P	regulation of multi-organism process	8	303	118	28397	6e-05	0.0011	// AT4G32260 // AT1G11310 // AT3G54640 // AT1G32060 // AT3G01500 // AT5G14740 // AT3G55800 // AT5G06290	NA
GO:0008104	P	protein localization	29	303	1216	28397	6.3e-05	0.0011	// AT3G54660 // AT4G32260 // AT4G26670 // AT3G54640 // AT5G49910 // AT5G19590 // AT1G20110 // AT5G57180 // AT5G38720 // AT3G46740 // AT5G14740 // AT1G61740 // AT4G01070 // AT3G55800 // AT5G28750 // AT2G25970 // AT1G06950 // AT1G32060 // AT3G01500 // AT1G69690 // AT2G33800 // AT5G06290 // AT2G15290 // AT1G51680 // AT1G11310 // AT1G75460 // AT4G26710 // AT1G04790 // AT1G65720	Exist
GO:0033692	P	cellular polysaccharide biosynthetic process	17	303	523	28397	7e-05	0.0013	// AT3G46970 // AT2G35960 // AT3G51510 // AT5G28500 // AT5G05200 // AT2G47590 // AT5G06700 // AT3G55250 // AT1G76450 // AT5G58330 // AT5G50250 // AT5G62220 // AT3G29320 // AT1G56190 // AT3G55800 // AT4G24620 // AT4G09010	NA
GO:0051246	P	regulation of protein metabolic process	11	303	237	28397	7.2e-05	0.0013	// AT1G76100 // AT1G75460 // AT4G32260 // AT1G75690 // AT1G67740 // AT1G20340 // AT1G32060 // AT1G69690 // AT1G54780 // AT5G45390 // AT3G55800	NA
GO:0048878	P	chemical homeostasis	12	303	281	28397	7.4e-05	0.0013	// AT3G26740 // AT5G19250 // AT2G15290 // AT1G66970 // AT2G05710 // AT1G20340 // AT1G76100 // AT1G56190 // AT5G43750 // AT1G55670 // AT1G16880 // AT4G04770	NA
GO:0019725	P	cellular homeostasis	13	303	328	28397	7.7e-05	0.0014	// AT3G26740 // AT5G19250 // AT3G54660 // AT2G15290 // AT5G43750 // AT1G66970 // AT1G76100 // AT5G40370 // AT1G56190 // AT1G55670 // AT1G16880 // AT1G76080 // AT4G04770	Exist
GO:0009814	P	defense response, incompatible interaction	17	303	536	28397	9.3e-05	0.0017	// AT3G01500 // AT4G35630 // AT1G75460 // AT2G22230 // AT1G11310 // AT3G54640 // AT1G32060 // AT5G50250 // AT4G32260 // AT5G14740 // AT1G69690 // AT3G55800 // AT1G31130 // AT3G54920 // AT2G37220 // AT5G08280 // AT5G06290	NA
GO:0015672	P	monovalent inorganic cation transport	11	303	245	28397	9.6e-05	0.0017	// AT4G00895 // AT5G52780 // AT4G32260 // AT5G64280 // AT5G44680 // AT3G25410 // AT1G20340 // AT2G18960 // AT4G26710 // AT5G47030 // AT4G38920	Exist
GO:0043085	P	positive regulation of catalytic activity	8	303	129	28397	0.00011	0.0019	// AT3G51510 // AT4G24620 // AT5G05200 // AT4G32260 // AT3G55250 // AT5G58330 // AT3G55800 // AT5G28500	NA
GO:0044093	P	positive regulation of molecular function	8	303	130	28397	0.00011	0.002	// AT3G51510 // AT4G24620 // AT5G05200 // AT4G32260 // AT3G55250 // AT5G58330 // AT3G55800 // AT5G28500	NA
GO:0044264	P	cellular polysaccharide metabolic process	18	303	601	28397	0.00012	0.002	// AT3G46970 // AT2G35960 // AT3G51510 // AT5G28500 // AT5G05200 // AT2G22230 // AT5G06700 // AT3G55250 // AT1G76450 // AT5G58330 // AT5G50250 // AT2G47590 // AT3G29320 // AT1G56190 // AT5G62220 // AT3G55800 // AT4G24620 // AT4G09010	NA
GO:0034220	P	ion transmembrane transport	8	303	133	28397	0.00013	0.0023	// AT4G00895 // AT4G32260 // AT5G64290 // AT5G47030 // AT2G18960 // AT4G26710 // AT5G12860 // AT4G38920	Exist
GO:0022621	P	shoot system development	20	303	723	28397	0.00014	0.0024	// AT1G01080 // AT5G55730 // AT1G32060 // AT3G20680 // AT3G15520 // AT1G20340 // AT3G51820 // AT3G04760 // AT3G28040 // AT5G18660 // AT1G69690 // AT4G09010 // AT4G24930 // AT3G55800 // AT1G68590 // AT3G53130 // AT5G28500 // AT2G36120 // AT5G08280 // AT2G20860	NA
GO:0048367	P	shoot development	20	303	723	28397	0.00014	0.0024	// AT1G01080 // AT5G55730 // AT1G32060 // AT3G20680 // AT3G15520 // AT1G20340 // AT3G51820 // AT3G04760 // AT3G28040 // AT5G18660 // AT1G69690 // AT4G09010 // AT4G24930 // AT3G55800 // AT1G68590 // AT3G53130 // AT5G28500 // AT2G36120 // AT5G08280 // AT2G20860	NA
GO:0030003	P	cellular cation homeostasis	9	303	172	28397	0.00014	0.0024	// AT3G26740 // AT5G19250 // AT2G15290 // AT5G43750 // AT1G76100 // AT1G56190 // AT1G55670 // AT1G16880 // AT4G04770	NA
GO:0006470	P	protein amino acid dephosphorylation	10	303	214	28397	0.00015	0.0025	// AT1G76100 // AT1G75460 // AT4G32260 // AT1G75690 // AT1G67740 // AT1G32060 // AT1G69690 // AT1G54780 // AT5G45390 // AT3G55800	NA
GO:0009651	P	response to salt stress	21	303	788	28397	0.00016	0.0027	// AT4G19120 // AT5G19250 // AT1G16880 // AT5G12860 // AT5G47030 // AT5G27470 // AT2G05710 // AT3G22890 // AT2G43090 // AT5G62350 // AT4G26710 // AT3G17210 // AT2G47730 // AT5G14920 // AT4G01070 // AT4G12730 // AT5G45550 // AT5G06290 // AT1G76490 // AT3G58610 // AT4G01900	Exist
GO:0045036	P	protein targeting to chloroplast	6	303	71	28397	0.00017	0.0028	// AT2G15290 // AT5G57180 // AT1G06950 // AT3G46740 // AT5G49910 // AT2G33800	Exist
GO:0043648	P	dicarboxylic acid metabolic process	8	303	143	28397	0.00021	0.0036	// AT3G47520 // AT3G54640 // AT3G51820 // AT5G58330 // AT5G18660 // AT2G25830 // AT5G08280 // AT2G20860	Exist
GO:0030001	P	metal ion transport	17	303	576	28397	0.00021	0.0036	// AT3G26740 // AT5G19250 // AT1G76100 // AT3G25410 // AT1G76490 // AT5G64280 // AT4G26710 // AT5G20650 // AT1G56190 // AT5G42130 // AT5G43750 // AT4G12730 // AT5G45550 // AT4G00430 // AT1G16880 // AT1G55670 // AT4G01900	NA
GO:0006952	P	defense response	34	303	1653	28397	0.00024	0.004	// AT3G11660 // AT2G22230 // AT3G22890 // AT3G23400 // AT2G23810 // AT3G54920 // AT2G37220 // AT4G35630 // AT5G50250 // AT4G32260 // AT5G14740 // AT1G31130 // AT1G61740 // AT4G01070 // AT3G55800 // AT2G47730 // AT3G06550 // AT5G05190 // AT1G75460 // AT3G52960 // AT3G27850 // AT1G32060 // AT3G01500 // AT1G69690 // AT2G33800 // AT3G23700 // AT5G06290 // AT1G51680 // AT1G11310 // AT3G29320 // AT3G17…	NA
GO:0065008	P	regulation of biological quality	34	303	1654	28397	0.00024	0.004	// AT3G54660 // AT1G54990 // AT2G22230 // AT1G76100 // AT3G22890 // AT5G19240 // AT5G38560 // AT5G45550 // AT3G54920 // AT3G26740 // AT5G43750 // AT1G31130 // AT4G12730 // AT1G21310 // AT5G19250 // AT1G66970 // AT3G54640 // AT5G40370 // AT2G45470 // AT5G12860 // AT1G76080 // AT4G04770 // AT3G08680 // AT5G16390 // AT2G15290 // AT3G22960 // AT2G43100 // AT1G01610 // AT2G05710 // AT1G20340 // AT1G56…	NA
GO:0010363	P	regulation of plant-type hypersensitive response	13	303	371	28397	0.00025	0.0041	// AT1G75460 // AT4G32260 // AT1G11310 // AT3G54640 // AT1G32060 // AT3G01500 // AT1G51680 // AT5G14740 // AT1G69690 // AT1G61740 // AT4G01070 // AT3G55800 // AT5G06290	NA
GO:0009832	P	plant-type cell wall biogenesis	8	303	147	28397	0.00025	0.0042	// AT3G06550 // AT5G16390 // AT3G22960 // AT2G22230 // AT2G05920 // AT5G12860 // AT2G45470 // AT5G06700	NA
GO:0048767	P	root hair elongation	9	303	188	28397	0.00026	0.0043	// AT5G16390 // AT2G22230 // AT1G01610 // AT1G20340 // AT1G31130 // AT4G12730 // AT1G21310 // AT3G54920 // AT1G23080	NA
GO:0006631	P	fatty acid metabolic process	17	303	587	28397	0.00026	0.0043	// AT5G43760 // AT5G16390 // AT2G22230 // AT2G02390 // AT1G01610 // AT1G65290 // AT5G18660 // AT5G46290 // AT1G04790 // AT3G25770 // AT1G54780 // AT1G67730 // AT4G20360 // AT4G01900 // AT5G19590 // AT3G53130 // AT2G20860	Exist
GO:0019220	P	regulation of phosphate metabolic process	10	303	231	28397	0.00026	0.0043	// AT1G76100 // AT1G75460 // AT4G32260 // AT1G75690 // AT1G67740 // AT1G32060 // AT1G69690 // AT1G54780 // AT5G45390 // AT3G55800	NA
GO:0051606	P	detection of stimulus	8	303	148	28397	0.00026	0.0043	// AT4G32260 // AT1G11310 // AT3G54640 // AT1G32060 // AT3G01500 // AT5G14740 // AT3G55800 // AT5G06290	NA
GO:0051174	P	regulation of phosphorus metabolic process	10	303	231	28397	0.00026	0.0043	// AT1G76100 // AT1G75460 // AT4G32260 // AT1G75690 // AT1G67740 // AT1G32060 // AT1G69690 // AT1G54780 // AT5G45390 // AT3G55800	NA
GO:0048731	P	system development	40	303	2083	28397	0.00027	0.0043	// AT3G54660 // AT5G45390 // AT2G22230 // AT2G05920 // AT3G51820 // AT3G04760 // AT4G38680 // AT4G30920 // AT1G68590 // AT3G53130 // AT3G54920 // AT2G20860 // AT3G56900 // AT3G20680 // AT3G46740 // AT5G55730 // AT1G31130 // AT3G55800 // AT2G45470 // AT1G16890 // AT3G19170 // AT2G43800 // AT1G01080 // AT3G15520 // AT1G32060 // AT4G12730 // AT1G69690 // AT1G21310 // AT2G36120 // AT3G08680 // AT5G16…	NA
GO:0048513	P	organ development	40	303	2083	28397	0.00027	0.0043	// AT3G54660 // AT5G45390 // AT2G22230 // AT2G05920 // AT3G51820 // AT3G04760 // AT4G38680 // AT4G30920 // AT1G68590 // AT3G53130 // AT3G54920 // AT2G20860 // AT3G56900 // AT3G20680 // AT3G46740 // AT5G55730 // AT1G31130 // AT3G55800 // AT2G45470 // AT1G16890 // AT3G19170 // AT2G43800 // AT1G01080 // AT3G15520 // AT1G32060 // AT4G12730 // AT1G69690 // AT1G21310 // AT2G36120 // AT3G08680 // AT5G16…	NA
GO:0006508	P	proteolysis	23	303	943	28397	0.00027	0.0043	// AT2G05920 // AT5G11770 // AT4G30920 // AT4G00585 // AT3G27925 // AT3G14240 // AT5G42270 // AT3G14067 // AT1G21310 // AT2G32480 // AT5G06600 // AT3G19170 // AT1G75460 // AT1G35340 // AT2G02390 // AT5G47030 // AT3G18490 // AT5G45390 // AT1G09750 // AT1G16890 // AT2G05710 // AT1G19740 // AT1G05140	Exist
GO:0080135	P	regulation of cellular response to stress	13	303	379	28397	0.0003	0.0048	// AT1G75460 // AT4G32260 // AT1G11310 // AT3G54640 // AT1G32060 // AT3G01500 // AT1G51680 // AT5G14740 // AT1G69690 // AT1G61740 // AT4G01070 // AT3G55800 // AT5G06290	NA
GO:0009867	P	jasmonic acid mediated signaling pathway	11	303	282	28397	0.00031	0.0049	// AT1G75460 // AT4G32260 // AT1G11310 // AT1G17440 // AT3G54640 // AT1G32060 // AT3G01500 // AT5G14740 // AT1G69690 // AT3G55800 // AT5G06290	NA
GO:0071395	P	cellular response to jasmonic acid stimulus	11	303	282	28397	0.00031	0.0049	// AT1G75460 // AT4G32260 // AT1G11310 // AT1G17440 // AT3G54640 // AT1G32060 // AT3G01500 // AT5G14740 // AT1G69690 // AT3G55800 // AT5G06290	NA
GO:0051704	P	multi-organism process	36	303	1820	28397	0.00032	0.005	// AT3G11660 // AT2G22230 // AT5G64290 // AT3G22890 // AT3G23400 // AT2G23810 // AT3G54920 // AT2G37220 // AT4G35630 // AT5G50250 // AT4G32260 // AT5G14740 // AT2G47730 // AT3G55800 // AT1G31130 // AT1G16410 // AT3G06550 // AT5G05190 // AT1G75460 // AT3G52960 // AT3G27850 // AT1G32060 // AT3G01500 // AT1G69690 // AT2G33800 // AT5G12860 // AT3G23700 // AT5G06290 // AT1G51680 // AT1G11310 // AT3G28…	NA
GO:0050790	P	regulation of catalytic activity	12	303	332	28397	0.00033	0.0051	// AT3G51510 // AT5G28500 // AT5G05200 // AT4G32260 // AT2G05920 // AT3G14240 // AT3G55250 // AT3G14067 // AT3G55800 // AT5G64620 // AT4G24620 // AT5G58330	NA
GO:0042592	P	homeostatic process	15	303	488	28397	0.00033	0.0051	// AT3G26740 // AT5G19250 // AT3G54660 // AT2G15290 // AT2G05710 // AT1G66970 // AT1G20340 // AT1G76100 // AT5G40370 // AT1G56190 // AT5G43750 // AT1G55670 // AT1G16880 // AT1G76080 // AT4G04770	Exist
GO:0006970	P	response to osmotic stress	21	303	842	28397	0.00037	0.0058	// AT4G19120 // AT5G19250 // AT1G16880 // AT5G12860 // AT5G47030 // AT5G27470 // AT2G05710 // AT3G22890 // AT2G43090 // AT5G62350 // AT4G26710 // AT3G17210 // AT2G47730 // AT5G14920 // AT4G01070 // AT4G12730 // AT5G45550 // AT5G06290 // AT1G76490 // AT3G58610 // AT4G01900	Exist
GO:0046907	P	intracellular transport	30	303	1423	28397	0.00038	0.0058	// AT3G54660 // AT4G32260 // AT3G54640 // AT1G79830 // AT5G49910 // AT5G45550 // AT5G19590 // AT1G20110 // AT5G57180 // AT5G38720 // AT3G46740 // AT5G14740 // AT1G61740 // AT4G01070 // AT3G55800 // AT1G75460 // AT2G25970 // AT1G06950 // AT1G32060 // AT3G01500 // AT1G69690 // AT2G33800 // AT5G06290 // AT2G15290 // AT1G51680 // AT1G11310 // AT4G26710 // AT5G20650 // AT1G04790 // AT1G65720	Exist
GO:0006612	P	protein targeting to membrane	13	303	392	28397	0.00041	0.0063	// AT1G75460 // AT4G32260 // AT1G11310 // AT3G54640 // AT1G32060 // AT3G01500 // AT1G51680 // AT5G14740 // AT1G69690 // AT1G61740 // AT4G01070 // AT3G55800 // AT5G06290	NA
GO:0016311	P	dephosphorylation	10	303	245	28397	0.00041	0.0063	// AT1G76100 // AT1G75460 // AT4G32260 // AT1G75690 // AT1G67740 // AT1G32060 // AT1G69690 // AT1G54780 // AT5G45390 // AT3G55800	NA
GO:0050832	P	defense response to fungus	12	303	342	28397	0.00042	0.0064	// AT3G06550 // AT2G22230 // AT1G11310 // AT3G54640 // AT1G32060 // AT3G01500 // AT4G32260 // AT5G14740 // AT3G17210 // AT3G55800 // AT2G23810 // AT5G06290	NA
GO:0071555	P	cell wall organization	17	303	613	28397	0.00043	0.0065	// AT3G08680 // AT3G22120 // AT5G16390 // AT5G48760 // AT2G22230 // AT1G01610 // AT2G05920 // AT1G20340 // AT3G54640 // AT2G43150 // AT1G21310 // AT2G21140 // AT2G45470 // AT5G06700 // AT4G24620 // AT3G54920 // AT1G23080	NA
GO:0043170	P	macromolecule metabolic process	127	303	9246	28397	0.00043	0.0065	// AT2G30570 // AT5G05200 // AT2G22230 // AT1G75690 // AT1G76490 // AT3G51820 // AT1G76880 // AT5G08050 // AT4G24620 // AT2G20860 // AT5G57180 // AT3G14240 // AT5G50250 // AT2G47730 // AT2G43090 // AT1G54780 // AT5G62220 // AT4G09040 // AT1G07110 // AT5G35100 // AT3G53890 // AT2G02390 // AT3G51950 // AT4G00330 // AT1G69690 // AT1G20696 // AT3G08680 // AT1G09750 // AT2G47590 // AT5G09330 // AT1G26…	NA
GO:0009653	P	anatomical structure morphogenesis	35	303	1783	28397	0.00045	0.0067	// AT2G22230 // AT3G51820 // AT3G04760 // AT5G18660 // AT1G68590 // AT5G45550 // AT3G53130 // AT3G54920 // AT2G20860 // AT3G56900 // AT3G20680 // AT3G46740 // AT1G31130 // AT3G55800 // AT2G45470 // AT1G16890 // AT2G43800 // AT1G01080 // AT3G15520 // AT1G32060 // AT4G12730 // AT1G69690 // AT1G21310 // AT3G08680 // AT5G16390 // AT1G01610 // AT5G38560 // AT1G20340 // AT3G28040 // AT5G67070 // AT4G09…	NA
GO:0043067	P	regulation of programmed cell death	13	303	397	28397	0.00046	0.0069	// AT1G75460 // AT4G32260 // AT1G11310 // AT3G54640 // AT1G32060 // AT3G01500 // AT1G51680 // AT5G14740 // AT1G69690 // AT1G61740 // AT4G01070 // AT3G55800 // AT5G06290	NA
GO:0009862	P	systemic acquired resistance, salicylic acid mediated signaling pathway	10	303	251	28397	0.00049	0.0073	// AT1G75460 // AT4G32260 // AT1G11310 // AT3G54640 // AT1G32060 // AT3G01500 // AT5G14740 // AT1G69690 // AT3G55800 // AT5G06290	NA
GO:0009626	P	plant-type hypersensitive response	13	303	401	28397	0.00051	0.0075	// AT1G75460 // AT4G32260 // AT1G11310 // AT3G54640 // AT1G32060 // AT3G01500 // AT1G51680 // AT5G14740 // AT1G69690 // AT1G61740 // AT4G01070 // AT3G55800 // AT5G06290	NA
GO:0034050	P	host programmed cell death induced by symbiont	13	303	402	28397	0.00052	0.0076	// AT1G75460 // AT4G32260 // AT1G11310 // AT3G54640 // AT1G32060 // AT3G01500 // AT1G51680 // AT5G14740 // AT1G69690 // AT1G61740 // AT4G01070 // AT3G55800 // AT5G06290	NA
GO:0006164	P	purine nucleotide biosynthetic process	7	303	125	28397	0.00052	0.0077	// AT4G00895 // AT4G32260 // AT5G47030 // AT4G11010 // AT2G18960 // AT3G05060 // AT3G58610	NA
GO:0010817	P	regulation of hormone levels	14	303	456	28397	0.00052	0.0077	// AT3G08680 // AT5G16390 // AT1G54990 // AT2G22230 // AT1G01610 // AT2G43100 // AT1G20340 // AT3G22890 // AT5G19240 // AT4G12730 // AT3G54640 // AT2G45470 // AT3G54920 // AT1G23080	NA
GO:0016126	P	sterol biosynthetic process	8	303	165	28397	0.00053	0.0077	// AT3G08680 // AT5G16390 // AT3G22960 // AT1G76490 // AT5G12860 // AT4G12730 // AT1G67730 // AT3G28200	NA
GO:0010941	P	regulation of cell death	13	303	405	28397	0.00055	0.008	// AT1G75460 // AT4G32260 // AT1G11310 // AT3G54640 // AT1G32060 // AT3G01500 // AT1G51680 // AT5G14740 // AT1G69690 // AT1G61740 // AT4G01070 // AT3G55800 // AT5G06290	NA
GO:0051187	P	cofactor catabolic process	6	303	92	28397	0.00062	0.0089	// AT4G13830 // AT5G05200 // AT5G66760 // AT2G46505 // AT3G14067 // AT3G27925	NA
GO:0045088	P	regulation of innate immune response	13	303	415	28397	0.00069	0.0099	// AT1G75460 // AT4G32260 // AT1G11310 // AT3G54640 // AT1G32060 // AT3G01500 // AT1G51680 // AT5G14740 // AT1G69690 // AT1G61740 // AT4G01070 // AT3G55800 // AT5G06290	NA
GO:0016125	P	sterol metabolic process	8	303	172	28397	0.00069	0.0099	// AT3G08680 // AT5G16390 // AT3G22960 // AT1G76490 // AT5G12860 // AT4G12730 // AT1G67730 // AT3G28200	NA
GO:0005199	F	structural constituent of cell wall	8	303	33	28397	9.9e-09	4.3e-06	// AT3G20470 // AT5G38560 // AT4G13340 // AT3G24480 // AT1G21310 // AT2G43150 // AT4G18670 // AT1G76930	NA
GO:0016836	F	hydro-lyase activity	9	303	72	28397	1.9e-07	4.2e-05	// AT3G58990 // AT2G26540 // AT2G43100 // AT2G22230 // AT2G05710 // AT3G54640 // AT3G01500 // AT5G14740 // AT2G43090	Exist
GO:0005198	F	structural molecule activity	21	303	549	28397	8.7e-07	0.00013	// AT4G18670 // AT3G53890 // AT2G33800 // AT2G38140 // AT3G27830 // AT5G38560 // AT3G27850 // AT4G04020 // AT5G48760 // AT3G23400 // AT4G13340 // AT1G57860 // AT3G24480 // AT1G20696 // AT1G21310 // AT1G68590 // AT2G24090 // AT1G32990 // AT1G76930 // AT2G43150 // AT3G20470	Exist
GO:0016835	F	carbon-oxygen lyase activity	10	303	150	28397	8.4e-06	0.00091	// AT3G58990 // AT2G26540 // AT2G43100 // AT2G22230 // AT2G05710 // AT3G54640 // AT3G01500 // AT5G14740 // AT2G43090 // AT3G54920	NA
GO:0016829	F	lyase activity	14	303	347	28397	3.4e-05	0.003	// AT3G58990 // AT2G26540 // AT2G43100 // AT2G22230 // AT2G05710 // AT5G14740 // AT1G17290 // AT3G01500 // AT2G47590 // AT1G08200 // AT3G48560 // AT2G43090 // AT3G54640 // AT3G54920	NA
GO:0044434	C	chloroplast part	111	303	1211	28397	1.6e-69	7.5e-67	// AT3G54660 // AT2G30570 // AT5G05200 // AT2G22230 // AT1G75690 // AT3G47520 // AT3G51820 // AT5G08050 // AT4G24620 // AT4G01150 // AT3G53560 // AT1G18500 // AT5G50250 // AT2G47730 // AT2G43090 // AT1G54780 // AT3G15840 // AT4G09040 // AT3G07430 // AT5G28750 // AT3G25480 // AT4G04770 // AT1G77490 // AT5G42765 // AT1G15140 // AT2G15290 // AT2G05710 // AT1G20340 // AT5G46290 // AT1G56190 // AT5G28…	Exist
GO:0044435	C	plastid part	111	303	1252	28397	4.1e-68	9.7e-66	// AT3G54660 // AT2G30570 // AT5G05200 // AT2G22230 // AT1G75690 // AT3G47520 // AT3G51820 // AT5G08050 // AT4G24620 // AT4G01150 // AT3G53560 // AT1G18500 // AT5G50250 // AT2G47730 // AT2G43090 // AT1G54780 // AT3G15840 // AT4G09040 // AT3G07430 // AT5G28750 // AT3G25480 // AT4G04770 // AT1G77490 // AT5G42765 // AT1G15140 // AT2G15290 // AT2G05710 // AT1G20340 // AT5G46290 // AT1G56190 // AT5G28…	Exist
GO:0009536	C	plastid	160	303	4037	28397	3.2e-55	5e-53	// AT3G54660 // AT2G30570 // AT5G05200 // AT2G22230 // AT1G75690 // AT3G47520 // AT3G51820 // AT3G04760 // AT5G08050 // AT4G24620 // AT2G20860 // AT3G26740 // AT4G00895 // AT4G01150 // AT3G53560 // AT2G36000 // AT1G18500 // AT5G50250 // AT2G47730 // AT2G43090 // AT1G61740 // AT3G15840 // AT4G09040 // AT5G35100 // AT3G07430 // AT5G28750 // AT1G49750 // AT1G66970 // AT3G25480 // AT4G04770 // AT1G77…	Exist
GO:0009507	C	chloroplast	158	303	3959	28397	1e-54	1.2e-52	// AT3G54660 // AT2G30570 // AT5G05200 // AT2G22230 // AT1G75690 // AT3G47520 // AT3G51820 // AT3G04760 // AT5G08050 // AT4G24620 // AT2G20860 // AT3G26740 // AT4G00895 // AT4G01150 // AT3G53560 // AT2G36000 // AT1G18500 // AT5G50250 // AT2G47730 // AT2G43090 // AT1G61740 // AT3G15840 // AT4G09040 // AT5G35100 // AT3G07430 // AT5G28750 // AT1G49750 // AT1G66970 // AT3G25480 // AT4G04770 // AT1G77…	Exist
GO:0044446	C	intracellular organelle part	145	303	3379	28397	8.6e-53	8.1e-51	// AT3G54660 // AT2G30570 // AT5G05200 // AT2G22230 // AT1G75690 // AT1G76490 // AT3G47520 // AT3G51820 // AT5G08050 // AT4G24620 // AT2G20860 // AT4G01150 // AT3G53560 // AT1G18500 // AT3G18035 // AT5G50250 // AT2G47730 // AT2G43090 // AT1G54780 // AT3G15840 // AT4G09040 // AT5G35100 // AT3G07430 // AT3G53890 // AT5G28750 // AT4G12730 // AT3G25480 // AT1G20696 // AT4G04770 // AT1G77490 // AT5G42…	Exist
GO:0044422	C	organelle part	145	303	3385	28397	1.1e-52	8.3e-51	// AT3G54660 // AT2G30570 // AT5G05200 // AT2G22230 // AT1G75690 // AT1G76490 // AT3G47520 // AT3G51820 // AT5G08050 // AT4G24620 // AT2G20860 // AT4G01150 // AT3G53560 // AT1G18500 // AT3G18035 // AT5G50250 // AT2G47730 // AT2G43090 // AT1G54780 // AT3G15840 // AT4G09040 // AT5G35100 // AT3G07430 // AT3G53890 // AT5G28750 // AT4G12730 // AT3G25480 // AT1G20696 // AT4G04770 // AT1G77490 // AT5G42…	Exist
GO:0009579	C	thylakoid	64	303	518	28397	6.9e-46	4.6e-44	// AT3G52960 // AT3G51510 // AT2G30570 // AT2G22230 // AT1G75690 // AT1G31330 // AT5G64290 // AT1G42960 // AT3G51820 // AT5G58330 // AT3G23400 // AT4G09010 // AT1G68590 // AT5G49910 // AT5G08050 // AT5G58250 // AT2G37220 // AT4G01150 // AT3G53560 // AT4G32260 // AT5G14740 // AT2G47730 // AT3G25770 // AT1G54780 // AT1G14345 // AT3G55800 // AT1G55670 // AT4G20360 // AT3G15520 // AT5G35100 // AT3G07…	Exist
GO:0009570	C	chloroplast stroma	62	303	603	28397	4.1e-40	2.4e-38	// AT3G54660 // AT1G75690 // AT3G47520 // AT3G22890 // AT5G58330 // AT2G31670 // AT4G30920 // AT1G68590 // AT5G49910 // AT4G24620 // AT4G25130 // AT2G37220 // AT3G58610 // AT4G35630 // AT1G32990 // AT3G04550 // AT1G18500 // AT2G43090 // AT1G76080 // AT5G50250 // AT2G38140 // AT5G14740 // AT2G47730 // AT3G25770 // AT3G55800 // AT4G20360 // AT5G06290 // AT1G66430 // AT3G19170 // AT1G01080 // AT3G27…	Exist
GO:0031984	C	organelle subcompartment	54	303	428	28397	4.9e-39	2.5e-37	// AT3G51510 // AT2G30570 // AT2G22230 // AT1G75690 // AT1G31330 // AT5G64290 // AT1G42960 // AT3G51820 // AT3G23400 // AT3G15520 // AT1G68590 // AT5G08050 // AT2G37220 // AT4G01150 // AT3G53560 // AT4G32260 // AT5G14740 // AT1G10950 // AT3G25770 // AT1G54780 // AT1G14345 // AT5G21430 // AT1G55670 // AT4G20360 // AT5G42270 // AT5G28750 // AT3G27830 // AT4G39710 // AT1G74070 // AT4G24930 // AT1G67…	Exist
GO:0009532	C	plastid stroma	62	303	637	28397	7.9e-39	3.7e-37	// AT3G54660 // AT1G75690 // AT3G47520 // AT3G22890 // AT5G58330 // AT2G31670 // AT4G30920 // AT1G68590 // AT5G49910 // AT4G24620 // AT4G25130 // AT2G37220 // AT3G58610 // AT4G35630 // AT1G32990 // AT3G04550 // AT1G18500 // AT2G43090 // AT1G76080 // AT5G50250 // AT2G38140 // AT5G14740 // AT2G47730 // AT3G25770 // AT3G55800 // AT4G20360 // AT5G06290 // AT1G66430 // AT3G19170 // AT1G01080 // AT3G27…	Exist
GO:0031976	C	plastid thylakoid	53	303	425	28397	4.5e-38	1.7e-36	// AT3G51510 // AT2G30570 // AT2G22230 // AT1G75690 // AT1G31330 // AT5G64290 // AT1G42960 // AT3G51820 // AT3G23400 // AT3G15520 // AT1G68590 // AT5G08050 // AT2G37220 // AT4G01150 // AT3G53560 // AT4G32260 // AT5G14740 // AT3G25770 // AT1G54780 // AT1G14345 // AT5G21430 // AT1G55670 // AT4G20360 // AT5G42270 // AT5G28750 // AT3G27830 // AT4G39710 // AT1G74070 // AT4G24930 // AT1G67740 // AT3G27…	Exist
GO:0009534	C	chloroplast thylakoid	53	303	425	28397	4.5e-38	1.7e-36	// AT3G51510 // AT2G30570 // AT2G22230 // AT1G75690 // AT1G31330 // AT5G64290 // AT1G42960 // AT3G51820 // AT3G23400 // AT3G15520 // AT1G68590 // AT5G08050 // AT2G37220 // AT4G01150 // AT3G53560 // AT4G32260 // AT5G14740 // AT3G25770 // AT1G54780 // AT1G14345 // AT5G21430 // AT1G55670 // AT4G20360 // AT5G42270 // AT5G28750 // AT3G27830 // AT4G39710 // AT1G74070 // AT4G24930 // AT1G67740 // AT3G27…	Exist
GO:0044436	C	thylakoid part	49	303	388	28397	2e-35	7.1e-34	// AT3G51510 // AT2G30570 // AT4G32260 // AT1G75690 // AT1G31330 // AT3G27925 // AT1G42960 // AT3G51820 // AT3G23400 // AT1G68590 // AT5G08050 // AT2G37220 // AT4G01150 // AT3G53560 // AT5G14740 // AT3G25770 // AT1G54780 // AT1G14345 // AT5G21430 // AT1G55670 // AT4G20360 // AT5G35100 // AT3G07430 // AT5G42270 // AT5G28750 // AT3G27830 // AT4G39710 // AT1G74070 // AT4G24930 // AT1G67740 // AT3G27…	Exist
GO:0009526	C	plastid envelope	56	303	598	28397	3.3e-34	1.1e-32	// AT4G32260 // AT1G31330 // AT5G64290 // AT3G47520 // AT1G42960 // AT5G58330 // AT3G23400 // AT3G26060 // AT5G49910 // AT3G53130 // AT4G24620 // AT4G25130 // AT2G37220 // AT3G58610 // AT1G32990 // AT4G01150 // AT3G53560 // AT3G25410 // AT3G46740 // AT5G50250 // AT2G38140 // AT5G14740 // AT5G33320 // AT2G47730 // AT3G25770 // AT5G42130 // AT3G55800 // AT1G55670 // AT4G20360 // AT4G26670 // AT3G07…	Exist
GO:0042651	C	thylakoid membrane	45	303	341	28397	2.7e-33	8.3e-32	// AT3G51510 // AT2G30570 // AT4G32260 // AT1G75690 // AT1G31330 // AT3G27925 // AT1G42960 // AT3G51820 // AT3G23400 // AT1G68590 // AT5G08050 // AT2G37220 // AT4G01150 // AT3G53560 // AT5G14740 // AT3G25770 // AT1G54780 // AT1G14345 // AT5G21430 // AT1G55670 // AT4G20360 // AT3G07430 // AT5G42270 // AT5G28750 // AT3G27830 // AT4G39710 // AT3G15520 // AT1G67740 // AT3G27850 // AT1G32060 // AT3G01…	Exist
GO:0009941	C	chloroplast envelope	54	303	573	28397	4.2e-33	1.2e-31	// AT4G32260 // AT1G31330 // AT5G64290 // AT3G47520 // AT1G42960 // AT5G58330 // AT3G23400 // AT3G26060 // AT5G49910 // AT3G53130 // AT1G32990 // AT4G25130 // AT2G37220 // AT3G58610 // AT4G24620 // AT4G01150 // AT3G53560 // AT3G25410 // AT3G46740 // AT5G50250 // AT2G38140 // AT5G14740 // AT2G47730 // AT3G25770 // AT5G42130 // AT3G55800 // AT1G55670 // AT4G20360 // AT4G26670 // AT3G07430 // AT5G42…	Exist
GO:0055035	C	plastid thylakoid membrane	44	303	324	28397	4.8e-33	1.3e-31	// AT3G51510 // AT2G30570 // AT4G32260 // AT1G75690 // AT1G31330 // AT3G27925 // AT1G42960 // AT3G51820 // AT3G23400 // AT1G68590 // AT5G08050 // AT2G37220 // AT4G01150 // AT3G53560 // AT5G14740 // AT3G25770 // AT1G54780 // AT1G14345 // AT5G21430 // AT1G55670 // AT4G20360 // AT5G42270 // AT5G28750 // AT3G27830 // AT4G39710 // AT3G15520 // AT1G67740 // AT3G27850 // AT1G32060 // AT3G01500 // AT3G25…	Exist
GO:0034357	C	photosynthetic membrane	45	303	355	28397	1.3e-32	3.3e-31	// AT3G51510 // AT2G30570 // AT4G32260 // AT1G75690 // AT1G31330 // AT3G27925 // AT1G42960 // AT3G51820 // AT3G23400 // AT1G68590 // AT5G08050 // AT2G37220 // AT4G01150 // AT3G53560 // AT5G14740 // AT3G25770 // AT1G54780 // AT1G14345 // AT5G21430 // AT1G55670 // AT4G20360 // AT3G07430 // AT5G42270 // AT5G28750 // AT3G27830 // AT4G39710 // AT3G15520 // AT1G67740 // AT3G27850 // AT1G32060 // AT3G01…	Exist
GO:0009535	C	chloroplast thylakoid membrane	43	303	322	28397	5e-32	1.2e-30	// AT3G51510 // AT2G30570 // AT4G32260 // AT1G75690 // AT1G31330 // AT3G27925 // AT1G42960 // AT3G51820 // AT3G23400 // AT1G68590 // AT5G08050 // AT2G37220 // AT4G01150 // AT3G53560 // AT5G14740 // AT3G25770 // AT1G54780 // AT1G14345 // AT5G21430 // AT1G55670 // AT4G20360 // AT5G42270 // AT5G28750 // AT3G27830 // AT4G39710 // AT3G15520 // AT1G67740 // AT3G27850 // AT1G32060 // AT3G01500 // AT3G25…	Exist
GO:0031975	C	envelope	64	303	929	28397	7e-32	1.6e-30	// AT4G32260 // AT1G31330 // AT5G64290 // AT3G47520 // AT1G42960 // AT5G11770 // AT5G58330 // AT2G31490 // AT3G23400 // AT3G26060 // AT4G00585 // AT3G53130 // AT4G24620 // AT4G25130 // AT2G37220 // AT3G58610 // AT1G32990 // AT4G01150 // AT2G38140 // AT3G53560 // AT3G25410 // AT3G46740 // AT5G50250 // AT2G46505 // AT5G14740 // AT5G33320 // AT2G47730 // AT3G25770 // AT5G42130 // AT3G55800 // AT1G55…	Exist
GO:0031967	C	organelle envelope	64	303	929	28397	7e-32	1.6e-30	// AT4G32260 // AT1G31330 // AT5G64290 // AT3G47520 // AT1G42960 // AT5G11770 // AT5G58330 // AT2G31490 // AT3G23400 // AT3G26060 // AT4G00585 // AT3G53130 // AT4G24620 // AT4G25130 // AT2G37220 // AT3G58610 // AT1G32990 // AT4G01150 // AT2G38140 // AT3G53560 // AT3G25410 // AT3G46740 // AT5G50250 // AT2G46505 // AT5G14740 // AT5G33320 // AT2G47730 // AT3G25770 // AT5G42130 // AT3G55800 // AT1G55…	Exist
GO:0044444	C	cytoplasmic part	207	303	9995	28397	2.3e-31	5e-30	// AT3G54660 // AT2G30570 // AT5G05200 // AT2G22230 // AT1G75690 // AT1G76490 // AT3G47520 // AT3G51820 // AT3G04760 // AT1G79830 // AT5G08050 // AT4G24620 // AT2G20860 // AT3G26740 // AT4G00895 // AT4G01150 // AT3G53560 // AT2G36000 // AT1G18500 // AT5G50250 // AT1G08200 // AT2G47730 // AT2G43090 // AT1G61740 // AT3G15840 // AT4G09040 // AT1G07110 // AT5G35100 // AT3G07430 // AT3G06550 // AT3G53…	Exist
GO:0031090	C	organelle membrane	67	303	1327	28397	6.1e-26	1.2e-24	// AT3G51510 // AT2G30570 // AT1G54990 // AT4G32260 // AT1G75690 // AT1G76490 // AT3G27925 // AT3G47520 // AT1G42960 // AT3G51820 // AT2G31490 // AT3G23400 // AT1G68590 // AT4G00585 // AT5G08050 // AT5G33320 // AT2G37220 // AT4G01150 // AT1G06950 // AT3G53560 // AT1G67740 // AT3G46740 // AT2G46505 // AT5G14740 // AT2G47730 // AT3G25770 // AT3G14067 // AT1G14345 // AT5G21430 // AT1G55670 // AT4G20…	Exist
GO:0005737	C	cytoplasm	212	303	12233	28397	4.9e-21	9.5e-20	// AT3G54660 // AT2G30570 // AT5G05200 // AT2G22230 // AT1G75690 // AT1G76490 // AT3G47520 // AT3G51820 // AT3G04760 // AT1G79830 // AT5G08050 // AT4G24620 // AT2G20860 // AT3G26740 // AT4G00895 // AT4G01150 // AT3G53560 // AT2G36000 // AT1G18500 // AT5G50250 // AT1G08200 // AT2G47730 // AT2G43090 // AT1G61740 // AT3G15840 // AT4G09040 // AT1G07110 // AT5G35100 // AT3G07430 // AT2G28840 // AT3G06…	Exist
GO:0016020	C	membrane	128	303	6122	28397	8.3e-16	1.6e-14	// AT3G11660 // AT2G30570 // AT5G05200 // AT1G75690 // AT1G76490 // AT3G47520 // AT3G51820 // AT5G08050 // AT5G03660 // AT3G52470 // AT2G35960 // AT4G01150 // AT3G53560 // AT2G47730 // AT1G54780 // AT3G29075 // AT5G62220 // AT4G20360 // AT1G07110 // AT3G07430 // AT5G28750 // AT1G49750 // AT1G66970 // AT5G40370 // AT3G25480 // AT3G08680 // AT1G77490 // AT5G42765 // AT2G15290 // AT1G26150 // AT5G38…	Exist
GO:0031977	C	thylakoid lumen	14	303	88	28397	4.1e-12	7.4e-11	// AT3G15520 // AT3G53560 // AT1G74070 // AT3G27925 // AT1G76100 // AT1G20340 // AT1G76450 // AT4G04020 // AT3G23400 // AT4G24930 // AT4G09010 // AT1G54780 // AT4G39710 // AT5G35100	Exist
GO:0031978	C	plastid thylakoid lumen	11	303	71	28397	1.1e-09	1.8e-08	// AT4G39710 // AT3G15520 // AT3G53560 // AT1G74070 // AT4G24930 // AT1G76100 // AT1G20340 // AT1G76450 // AT4G09010 // AT1G54780 // AT3G27925	Exist
GO:0009543	C	chloroplast thylakoid lumen	11	303	71	28397	1.1e-09	1.8e-08	// AT4G39710 // AT3G15520 // AT3G53560 // AT1G74070 // AT4G24930 // AT1G76100 // AT1G20340 // AT1G76450 // AT4G09010 // AT1G54780 // AT3G27925	Exist
GO:0010319	C	stromule	9	303	37	28397	1.1e-09	1.8e-08	// AT1G16880 // AT3G47520 // AT4G04020 // AT3G01500 // AT2G47730 // AT3G25770 // AT1G32060 // AT2G37220 // AT5G06290	Exist
GO:0044464	C	cell part	278	303	22455	28397	2.1e-09	3.2e-08	// AT3G11660 // AT2G31670 // AT3G54660 // AT2G30570 // AT5G05200 // AT2G22230 // AT1G75690 // AT1G76490 // AT3G58120 // AT3G47520 // AT3G51820 // AT3G04760 // AT1G79830 // AT5G11770 // AT1G76880 // AT5G08050 // AT5G03660 // AT4G24620 // AT3G52470 // AT2G20860 // AT3G26740 // AT4G00895 // AT4G01150 // AT5G57180 // AT3G53560 // AT2G36000 // AT1G18500 // AT3G14240 // AT3G18035 // AT5G50250 // AT3G47…	Exist
GO:0005623	C	cell	278	303	22455	28397	2.1e-09	3.2e-08	// AT3G11660 // AT2G31670 // AT3G54660 // AT2G30570 // AT5G05200 // AT2G22230 // AT1G75690 // AT1G76490 // AT3G58120 // AT3G47520 // AT3G51820 // AT3G04760 // AT1G79830 // AT5G11770 // AT1G76880 // AT5G08050 // AT5G03660 // AT4G24620 // AT3G52470 // AT2G20860 // AT3G26740 // AT4G00895 // AT4G01150 // AT5G57180 // AT3G53560 // AT2G36000 // AT1G18500 // AT3G14240 // AT3G18035 // AT5G50250 // AT3G47…	Exist
GO:0043229	C	intracellular organelle	236	303	17570	28397	2.2e-09	3.2e-08	// AT3G54660 // AT2G30570 // AT5G05200 // AT2G22230 // AT1G75690 // AT1G76490 // AT3G58120 // AT3G47520 // AT3G51820 // AT3G04760 // AT1G79830 // AT5G11770 // AT1G76880 // AT5G08050 // AT5G03660 // AT4G24620 // AT2G20860 // AT3G26740 // AT4G00895 // AT4G01150 // AT5G57180 // AT3G53560 // AT2G36000 // AT1G18500 // AT3G18035 // AT5G50250 // AT1G08200 // AT2G47730 // AT2G43090 // AT1G61740 // AT3G15…	Exist
GO:0043226	C	organelle	236	303	17578	28397	2.3e-09	3.3e-08	// AT3G54660 // AT2G30570 // AT5G05200 // AT2G22230 // AT1G75690 // AT1G76490 // AT3G58120 // AT3G47520 // AT3G51820 // AT3G04760 // AT1G79830 // AT5G11770 // AT1G76880 // AT5G08050 // AT5G03660 // AT4G24620 // AT2G20860 // AT3G26740 // AT4G00895 // AT4G01150 // AT5G57180 // AT3G53560 // AT2G36000 // AT1G18500 // AT3G18035 // AT5G50250 // AT1G08200 // AT2G47730 // AT2G43090 // AT1G61740 // AT3G15…	Exist
GO:0043231	C	intracellular membrane-bounded organelle	233	303	17343	28397	4.2e-09	5.8e-08	// AT3G54660 // AT2G30570 // AT5G05200 // AT2G22230 // AT1G75690 // AT1G76490 // AT3G58120 // AT3G47520 // AT3G51820 // AT3G04760 // AT1G79830 // AT5G11770 // AT1G76880 // AT5G08050 // AT5G03660 // AT4G24620 // AT2G20860 // AT3G26740 // AT4G00895 // AT4G01150 // AT5G57180 // AT3G53560 // AT2G36000 // AT1G18500 // AT3G18035 // AT5G50250 // AT1G08200 // AT2G47730 // AT2G43090 // AT1G61740 // AT3G15…	Exist
GO:0043227	C	membrane-bounded organelle	233	303	17349	28397	4.4e-09	5.9e-08	// AT3G54660 // AT2G30570 // AT5G05200 // AT2G22230 // AT1G75690 // AT1G76490 // AT3G58120 // AT3G47520 // AT3G51820 // AT3G04760 // AT1G79830 // AT5G11770 // AT1G76880 // AT5G08050 // AT5G03660 // AT4G24620 // AT2G20860 // AT3G26740 // AT4G00895 // AT4G01150 // AT5G57180 // AT3G53560 // AT2G36000 // AT1G18500 // AT3G18035 // AT5G50250 // AT1G08200 // AT2G47730 // AT2G43090 // AT1G61740 // AT3G15…	Exist
GO:0048046	C	apoplast	20	303	406	28397	3.4e-08	4.5e-07	// AT1G09750 // AT3G19170 // AT4G27520 // AT5G14740 // AT5G49910 // AT3G47520 // AT1G66970 // AT5G67070 // AT1G32060 // AT3G01500 // AT5G40370 // AT1G08200 // AT3G58610 // AT3G14067 // AT3G55800 // AT2G45470 // AT4G20360 // AT5G58330 // AT5G08280 // AT5G06290	Exist
GO:0070013	C	intracellular organelle lumen	23	303	622	28397	4.6e-07	5.6e-06	// AT5G27120 // AT4G38680 // AT3G23400 // AT3G27925 // AT4G35800 // AT2G18510 // AT2G20860 // AT3G53560 // AT1G54780 // AT4G39710 // AT4G20360 // AT5G35100 // AT1G17440 // AT1G74070 // AT3G15520 // AT1G76100 // AT1G20340 // AT1G76450 // AT4G04020 // AT3G05060 // AT1G65290 // AT4G09010 // AT4G24930	Exist
GO:0043233	C	organelle lumen	23	303	622	28397	4.6e-07	5.6e-06	// AT5G27120 // AT4G38680 // AT3G23400 // AT3G27925 // AT4G35800 // AT2G18510 // AT2G20860 // AT3G53560 // AT1G54780 // AT4G39710 // AT4G20360 // AT5G35100 // AT1G17440 // AT1G74070 // AT3G15520 // AT1G76100 // AT1G20340 // AT1G76450 // AT4G04020 // AT3G05060 // AT1G65290 // AT4G09010 // AT4G24930	Exist
GO:0031974	C	membrane-enclosed lumen	23	303	628	28397	5.3e-07	6.4e-06	// AT5G27120 // AT4G38680 // AT3G23400 // AT3G27925 // AT4G35800 // AT2G18510 // AT2G20860 // AT3G53560 // AT1G54780 // AT4G39710 // AT4G20360 // AT5G35100 // AT1G17440 // AT1G74070 // AT3G15520 // AT1G76100 // AT1G20340 // AT1G76450 // AT4G04020 // AT3G05060 // AT1G65290 // AT4G09010 // AT4G24930	Exist
GO:0019866	C	organelle inner membrane	14	303	285	28397	4.1e-06	4.9e-05	// AT2G15290 // AT5G66760 // AT1G06950 // AT4G26670 // AT4G11010 // AT1G42960 // AT5G33320 // AT2G31490 // AT2G46505 // AT5G11770 // AT4G00585 // AT5G47030 // AT2G32480 // AT5G66380	Exist
GO:0044424	C	intracellular part	247	303	19957	28397	5.9e-06	6.8e-05	// AT3G54660 // AT2G30570 // AT5G05200 // AT2G22230 // AT1G75690 // AT1G76490 // AT3G58120 // AT3G47520 // AT3G51820 // AT3G04760 // AT1G79830 // AT5G11770 // AT1G76880 // AT5G08050 // AT5G03660 // AT4G24620 // AT2G20860 // AT3G26740 // AT4G00895 // AT4G01150 // AT5G57180 // AT3G53560 // AT2G36000 // AT1G18500 // AT3G18035 // AT5G50250 // AT1G08200 // AT2G47730 // AT2G43090 // AT1G61740 // AT3G15…	Exist
GO:0005622	C	intracellular	247	303	20042	28397	9.7e-06	0.00011	// AT3G54660 // AT2G30570 // AT5G05200 // AT2G22230 // AT1G75690 // AT1G76490 // AT3G58120 // AT3G47520 // AT3G51820 // AT3G04760 // AT1G79830 // AT5G11770 // AT1G76880 // AT5G08050 // AT5G03660 // AT4G24620 // AT2G20860 // AT3G26740 // AT4G00895 // AT4G01150 // AT5G57180 // AT3G53560 // AT2G36000 // AT1G18500 // AT3G18035 // AT5G50250 // AT1G08200 // AT2G47730 // AT2G43090 // AT1G61740 // AT3G15…	Exist
GO:0046658	C	anchored to plasma membrane	7	303	68	28397	1.5e-05	0.00016	// AT4G27520 // AT5G55730 // AT1G66970 // AT4G12730 // AT2G45470 // AT3G54920 // AT5G19250	NA
GO:0010287	C	plastoglobule	7	303	68	28397	1.5e-05	0.00016	// AT4G01150 // AT5G05200 // AT1G31330 // AT4G04020 // AT3G23400 // AT3G26060 // AT4G19170	Exist
GO:0044425	C	membrane part	48	303	2448	28397	3.7e-05	0.00038	// AT2G30570 // AT4G27520 // AT5G55730 // AT1G76490 // AT2G05920 // AT5G27120 // AT4G26670 // AT2G31490 // AT2G23810 // AT5G11770 // AT4G00585 // AT5G03660 // AT4G35800 // AT4G16140 // AT3G52470 // AT3G63460 // AT1G55670 // AT1G67740 // AT1G06950 // AT3G54920 // AT2G18960 // AT3G46740 // AT2G46505 // AT1G10950 // AT4G12730 // AT2G45470 // AT2G32480 // AT1G31330 // AT5G28750 // AT3G27830 // AT4G39…	Exist
GO:0042170	C	plastid membrane	7	303	98	28397	0.00013	0.0013	// AT2G15290 // AT1G06950 // AT1G42960 // AT5G33320 // AT3G52230 // AT3G46740 // AT2G32480	Exist
GO:0044459	C	plasma membrane part	25	303	1065	28397	0.00026	0.0026	// AT4G27520 // AT5G55730 // AT2G05920 // AT5G27120 // AT2G23810 // AT5G03660 // AT4G35800 // AT3G54920 // AT3G63460 // AT3G52470 // AT2G18960 // AT4G12730 // AT2G45470 // AT5G28750 // AT3G27830 // AT1G66970 // AT3G52060 // AT4G18670 // AT5G19250 // AT3G08680 // AT1G11310 // AT4G13340 // AT5G20650 // AT3G24480 // AT1G23080	NA
GO:0009528	C	plastid inner membrane	5	303	52	28397	0.00034	0.0033	// AT1G06950 // AT2G32480 // AT2G15290 // AT1G42960 // AT5G33320	Exist
GO:0031226	C	intrinsic to plasma membrane	7	303	121	28397	0.00043	0.0042	// AT4G27520 // AT5G55730 // AT1G66970 // AT4G12730 // AT2G45470 // AT3G54920 // AT5G19250	NA
GO:0005618	C	cell wall	17	303	618	28397	0.00047	0.0044	// AT3G08680 // AT1G09750 // AT3G20470 // AT5G66760 // AT2G22230 // AT3G52960 // AT2G05920 // AT2G05710 // AT3G14240 // AT5G55730 // AT4G13340 // AT3G24480 // AT3G28200 // AT3G14067 // AT2G45470 // AT2G21140 // AT3G58610	Exist
GO:0030312	C	external encapsulating structure	17	303	621	28397	0.00049	0.0045	// AT3G08680 // AT1G09750 // AT3G20470 // AT5G66760 // AT2G22230 // AT3G52960 // AT2G05920 // AT2G05710 // AT3G14240 // AT5G55730 // AT4G13340 // AT3G24480 // AT3G28200 // AT3G14067 // AT2G45470 // AT2G21140 // AT3G58610	Exist
GO:0031969	C	chloroplast membrane	6	303	88	28397	0.00049	0.0045	// AT2G15290 // AT1G06950 // AT1G42960 // AT3G46740 // AT3G52230 // AT2G32480	Exist
GO:0032991	C	macromolecular complex	38	303	2050	28397	0.00074	0.0066	// AT3G58990 // AT2G30570 // AT5G48760 // AT2G43970 // AT1G31330 // AT1G17440 // AT2G31490 // AT5G11770 // AT4G00585 // AT4G38920 // AT4G35800 // AT1G32990 // AT1G57860 // AT3G63460 // AT1G67740 // AT2G38140 // AT3G18035 // AT2G46505 // AT2G43090 // AT1G55670 // AT2G24090 // AT1G16890 // AT4G26670 // AT3G53890 // AT5G28750 // AT3G27830 // AT4G39710 // AT1G06950 // AT3G27850 // AT2G33800 // AT5G45…	Exist
GO:0009505	C	plant-type cell wall	10	303	274	28397	0.00094	0.0082	// AT3G08680 // AT1G09750 // AT3G20470 // AT3G52960 // AT2G05920 // AT4G13340 // AT3G24480 // AT3G14067 // AT2G45470 // AT3G28200	NA
GO:0044429	C	mitochondrial part	11	303	328	28397	0.001	0.0087	// AT5G66760 // AT5G47030 // AT4G26670 // AT4G11010 // AT2G31490 // AT2G46505 // AT1G65290 // AT4G00585 // AT2G20860 // AT5G11770 // AT5G66380	Exist
GO:0005743	C	mitochondrial inner membrane	9	303	229	28397	0.001	0.0087	// AT5G66760 // AT4G11010 // AT4G26670 // AT5G47030 // AT2G31490 // AT2G46505 // AT5G11770 // AT4G00585 // AT5G66380	Exist

## Sheet: Col-0 vs F1LC DMG
GO_acc	term_type	Term	queryitem	querytotal	bgitem	bgtotal	pvalue	FDR	entries	col_ler
GO:0034641	P	cellular nitrogen compound metabolic process	84	454	1373	28397	2.4e-25	4e-22	// AT3G58990 // AT1G15710 // AT5G05200 // AT5G36120 // AT4G02770 // AT2G22230 // AT1G75690 // AT1G31330 // AT2G05920 // AT3G62120 // AT1G14810 // AT3G48560 // AT2G31670 // AT5G18660 // AT3G26060 // AT1G15810 // AT3G27925 // AT5G52810 // AT4G13830 // AT1G32990 // AT4G25130 // AT2G43090 // AT3G18680 // AT5G12860 // AT3G12780 // AT3G61870 // AT4G23600 // AT5G27470 // AT5G66120 // AT1G18500 // AT1G58…	NA
GO:0043436	P	oxoacid metabolic process	105	454	2103	28397	4.1e-25	4e-22	// AT3G12780 // AT2G22230 // AT2G41680 // AT3G47520 // AT3G62120 // AT3G51820 // AT4G24620 // AT3G18680 // AT3G25770 // AT5G66120 // AT1G18500 // AT2G26080 // AT5G50250 // AT2G43090 // AT1G54780 // AT4G20360 // AT4G23670 // AT3G23940 // AT2G47590 // AT2G05710 // AT1G20340 // AT4G34200 // AT3G17210 // AT3G10670 // AT5G11880 // AT5G08280 // AT1G24100 // AT1G15710 // AT4G32260 // AT4G23600 // AT1G31…	Exist
GO:0006082	P	organic acid metabolic process	105	454	2105	28397	4.5e-25	4e-22	// AT3G12780 // AT2G22230 // AT2G41680 // AT3G47520 // AT3G62120 // AT3G51820 // AT4G24620 // AT3G18680 // AT3G25770 // AT5G66120 // AT1G18500 // AT2G26080 // AT5G50250 // AT2G43090 // AT1G54780 // AT4G20360 // AT4G23670 // AT3G23940 // AT2G47590 // AT2G05710 // AT1G20340 // AT4G34200 // AT3G17210 // AT3G10670 // AT5G11880 // AT5G08280 // AT1G24100 // AT1G15710 // AT4G32260 // AT4G23600 // AT1G31…	Exist
GO:0042180	P	cellular ketone metabolic process	106	454	2123	28397	2.3e-25	4e-22	// AT3G12780 // AT2G22230 // AT2G41680 // AT3G47520 // AT3G62120 // AT3G51820 // AT4G24620 // AT3G18680 // AT3G25770 // AT5G66120 // AT1G18500 // AT2G26080 // AT5G50250 // AT2G43090 // AT1G54780 // AT4G20360 // AT4G23670 // AT3G23940 // AT2G47590 // AT2G05710 // AT1G20340 // AT4G34200 // AT5G46290 // AT3G10670 // AT5G11880 // AT5G08280 // AT1G24100 // AT1G15710 // AT4G32260 // AT4G23600 // AT1G31…	NA
GO:0019752	P	carboxylic acid metabolic process	105	454	2103	28397	4.1e-25	4e-22	// AT3G12780 // AT2G22230 // AT2G41680 // AT3G47520 // AT3G62120 // AT3G51820 // AT4G24620 // AT3G18680 // AT3G25770 // AT5G66120 // AT1G18500 // AT2G26080 // AT5G50250 // AT2G43090 // AT1G54780 // AT4G20360 // AT4G23670 // AT3G23940 // AT2G47590 // AT2G05710 // AT1G20340 // AT4G34200 // AT3G17210 // AT3G10670 // AT5G11880 // AT5G08280 // AT1G24100 // AT1G15710 // AT4G32260 // AT4G23600 // AT1G31…	Exist
GO:0009657	P	plastid organization	47	454	398	28397	5.5e-25	4.1e-22	// AT4G02770 // AT3G54660 // AT5G36120 // AT4G32260 // AT1G75690 // AT2G41680 // AT3G51820 // AT5G58330 // AT3G23400 // AT1G53230 // AT1G68590 // AT2G39140 // AT1G30210 // AT1G32990 // AT3G18680 // AT3G21055 // AT3G61870 // AT5G43750 // AT5G50250 // AT2G38140 // AT1G54780 // AT2G32480 // AT1G03600 // AT2G02070 // AT3G07430 // AT4G09730 // AT3G19170 // AT1G06950 // AT3G12780 // AT1G67740 // AT3G44…	Exist
GO:0044281	P	small molecule metabolic process	153	454	4065	28397	7.7e-25	4.9e-22	// AT3G54660 // AT5G36120 // AT2G22230 // AT1G75690 // AT2G41680 // AT3G47520 // AT3G62120 // AT3G51820 // AT5G23070 // AT4G24620 // AT3G18680 // AT4G00895 // AT3G12780 // AT5G66120 // AT1G18500 // AT2G26080 // AT5G50250 // AT2G43090 // AT1G54780 // AT5G47210 // AT4G20360 // AT1G07110 // AT3G07430 // AT3G22110 // AT1G20696 // AT4G23670 // AT3G23940 // AT3G25770 // AT2G47590 // AT2G05710 // AT1G20…	Exist
GO:0006091	P	generation of precursor metabolites and energy	58	454	730	28397	1.3e-22	7.4e-20	// AT4G02770 // AT1G10960 // AT3G12780 // AT4G32260 // AT1G75690 // AT3G52150 // AT5G58330 // AT5G62350 // AT3G27925 // AT5G23070 // AT4G04020 // AT2G37220 // AT4G24620 // AT3G21055 // AT3G61870 // AT3G11830 // AT5G27470 // AT1G54500 // AT5G08410 // AT5G50250 // AT2G46505 // AT5G14740 // AT3G17210 // AT1G66430 // AT1G54780 // AT1G14345 // AT3G22110 // AT1G55670 // AT2G32480 // AT1G03600 // AT2G43…	Exist
GO:0015979	P	photosynthesis	44	454	435	28397	5.1e-21	2.5e-18	// AT4G02770 // AT3G12780 // AT4G32260 // AT1G75690 // AT1G31330 // AT3G52150 // AT5G58330 // AT1G67840 // AT3G27925 // AT4G33480 // AT2G37220 // AT3G21055 // AT3G61870 // AT1G54500 // AT5G08410 // AT5G50250 // AT5G14740 // AT5G42270 // AT1G54780 // AT1G14345 // AT1G55670 // AT2G32480 // AT1G03600 // AT1G75460 // AT1G67740 // AT1G32060 // AT3G01500 // AT2G05710 // AT5G45390 // AT5G52780 // AT3G23…	Exist
GO:0019684	P	photosynthesis, light reaction	39	454	333	28397	8.9e-21	4e-18	// AT4G02770 // AT3G12780 // AT4G32260 // AT1G75690 // AT3G52150 // AT5G58330 // AT3G27925 // AT4G33480 // AT2G37220 // AT3G21055 // AT3G61870 // AT1G54500 // AT5G08410 // AT5G50250 // AT5G14740 // AT5G42270 // AT1G54780 // AT1G14345 // AT1G55670 // AT2G32480 // AT1G03600 // AT1G75460 // AT1G67740 // AT1G32060 // AT3G01500 // AT5G45390 // AT5G52780 // AT3G23700 // AT5G06290 // AT1G03130 // AT1G76…	Exist
GO:0044262	P	cellular carbohydrate metabolic process	88	454	1778	28397	1.1e-20	4.6e-18	// AT5G05200 // AT5G36120 // AT2G22230 // AT1G75690 // AT2G41680 // AT3G47520 // AT3G51820 // AT4G24620 // AT3G23700 // AT3G12780 // AT5G50250 // AT2G43090 // AT1G54780 // AT5G62220 // AT1G07110 // AT2G01290 // AT1G20696 // AT4G34950 // AT2G47590 // AT2G05710 // AT1G20340 // AT3G17210 // AT3G10670 // AT5G28500 // AT5G14040 // AT5G08280 // AT1G24100 // AT4G27520 // AT4G32260 // AT5G58330 // AT5G18…	NA
GO:0005996	P	monosaccharide metabolic process	57	454	804	28397	5e-20	1.9e-17	// AT1G10960 // AT5G36120 // AT4G32260 // AT1G75690 // AT2G41680 // AT3G27925 // AT3G51820 // AT5G62350 // AT5G18660 // AT1G68590 // AT3G52150 // AT1G32990 // AT4G24620 // AT3G12780 // AT3G61870 // AT3G11830 // AT5G43750 // AT5G27470 // AT5G08280 // AT5G50250 // AT2G46505 // AT1G66430 // AT1G54780 // AT1G14345 // AT3G22110 // AT2G24090 // AT1G07110 // AT5G06600 // AT2G43090 // AT4G23600 // AT1G01…	NA
GO:0006066	P	alcohol metabolic process	67	454	1143	28397	2.7e-19	9.4e-17	// AT1G10960 // AT5G36120 // AT4G32260 // AT1G75690 // AT2G41680 // AT3G27925 // AT3G51820 // AT5G62350 // AT2G14890 // AT1G22850 // AT1G68590 // AT3G52150 // AT1G67730 // AT1G32990 // AT5G12860 // AT4G24620 // AT3G12780 // AT3G61870 // AT3G11830 // AT5G43750 // AT5G27470 // AT5G08280 // AT5G50250 // AT2G46505 // AT1G66430 // AT1G54780 // AT1G14345 // AT3G22110 // AT2G24090 // AT1G07110 // AT5G06…	NA
GO:0009987	P	cellular process	324	454	14419	28397	6.4e-19	2e-16	// AT1G33240 // AT3G54660 // AT5G05200 // AT5G36120 // AT2G22230 // AT1G75690 // AT2G41680 // AT3G47520 // AT3G62120 // AT3G51820 // AT4G39960 // AT1G67840 // AT1G76880 // AT4G32530 // AT1G30210 // AT4G24620 // AT4G36870 // AT3G18680 // AT5G42750 // AT4G00895 // AT5G57180 // AT5G58330 // AT5G66120 // AT1G18500 // AT3G18035 // AT5G50250 // AT2G47730 // AT2G35860 // AT1G54780 // AT1G72750 // AT3G15…	Exist
GO:0005975	P	carbohydrate metabolic process	97	454	2249	28397	7.6e-19	2.3e-16	// AT5G05200 // AT5G36120 // AT2G22230 // AT1G75690 // AT2G41680 // AT3G47520 // AT3G51820 // AT4G24620 // AT3G45160 // AT3G12780 // AT5G50250 // AT2G43090 // AT1G54780 // AT5G62220 // AT1G07110 // AT2G01290 // AT1G20696 // AT4G34950 // AT2G47590 // AT2G05710 // AT1G20340 // AT3G17210 // AT3G10670 // AT5G28500 // AT1G60590 // AT5G14040 // AT5G08280 // AT1G24100 // AT4G27520 // AT4G32260 // AT5G58…	NA
GO:0006520	P	cellular amino acid metabolic process	57	454	882	28397	2.7e-18	7.7e-16	// AT3G58990 // AT1G15710 // AT3G12780 // AT4G02770 // AT2G22230 // AT4G23600 // AT1G31330 // AT2G05920 // AT3G62120 // AT1G14810 // AT3G48560 // AT2G31670 // AT5G18660 // AT3G26060 // AT1G15810 // AT5G12860 // AT4G25130 // AT2G43090 // AT3G18680 // AT5G27470 // AT5G66120 // AT1G18500 // AT1G58080 // AT2G26080 // AT3G13110 // AT1G66430 // AT1G54780 // AT2G40660 // AT1G29900 // AT1G55670 // AT1G75…	Exist
GO:0044282	P	small molecule catabolic process	58	454	932	28397	6.9e-18	1.7e-15	// AT1G15710 // AT5G36120 // AT4G32260 // AT1G75690 // AT3G54640 // AT3G51820 // AT1G20340 // AT5G62350 // AT5G18660 // AT5G43280 // AT3G27925 // AT4G24620 // AT4G25130 // AT3G12780 // AT3G61870 // AT3G11830 // AT5G19590 // AT5G27470 // AT1G58080 // AT2G26080 // AT5G50250 // AT2G46505 // AT3G13110 // AT2G43090 // AT1G14345 // AT3G22110 // AT1G04790 // AT2G24090 // AT5G06600 // AT5G01750 // AT4G23…	Exist
GO:0051186	P	cofactor metabolic process	52	454	753	28397	7e-18	1.7e-15	// AT4G23800 // AT3G54660 // AT5G05200 // AT5G36120 // AT2G22230 // AT1G75690 // AT2G41680 // AT3G51820 // AT1G10960 // AT2G14890 // AT1G53230 // AT3G26060 // AT3G27925 // AT1G30210 // AT1G32990 // AT3G18680 // AT3G12780 // AT3G61870 // AT2G46505 // AT5G66120 // AT5G08280 // AT5G08410 // AT5G50250 // AT4G32260 // AT3G17210 // AT5G42270 // AT1G54780 // AT1G14345 // AT1G55670 // AT2G24090 // AT4G13…	Exist
GO:0044106	P	cellular amine metabolic process	58	454	947	28397	1.4e-17	3.3e-15	// AT3G58990 // AT1G15710 // AT3G12780 // AT4G02770 // AT2G22230 // AT4G23600 // AT1G31330 // AT2G05920 // AT3G62120 // AT1G14810 // AT3G48560 // AT2G31670 // AT5G18660 // AT3G26060 // AT1G15810 // AT5G12860 // AT4G25130 // AT2G43090 // AT3G18680 // AT5G27470 // AT5G66120 // AT1G18500 // AT1G58080 // AT2G26080 // AT3G13110 // AT1G66430 // AT1G54780 // AT2G40660 // AT1G29900 // AT1G55670 // AT1G75…	NA
GO:0044272	P	sulfur compound biosynthetic process	41	454	486	28397	4.6e-17	1e-14	// AT3G58990 // AT4G27520 // AT3G12780 // AT4G02770 // AT2G22230 // AT4G23600 // AT1G31330 // AT2G05920 // AT3G51820 // AT5G58330 // AT2G31670 // AT5G18660 // AT3G26060 // AT1G15810 // AT3G27925 // AT1G58080 // AT5G08410 // AT4G32260 // AT3G13110 // AT1G66430 // AT1G54780 // AT1G55670 // AT5G42270 // AT1G16410 // AT1G67740 // AT1G32060 // AT1G14810 // AT4G23670 // AT3G45160 // AT1G63970 // AT5G06…	NA
GO:0044237	P	cellular metabolic process	273	454	11509	28397	5.6e-17	1.2e-14	// AT1G33240 // AT3G54660 // AT5G05200 // AT5G36120 // AT2G22230 // AT1G75690 // AT2G41680 // AT3G47520 // AT3G62120 // AT3G51820 // AT4G39960 // AT1G67840 // AT1G76880 // AT1G30210 // AT4G24620 // AT4G36870 // AT3G18680 // AT5G42750 // AT4G00895 // AT5G57180 // AT5G58330 // AT5G66120 // AT1G18500 // AT1G62850 // AT5G50250 // AT2G47730 // AT2G43090 // AT1G54780 // AT3G15840 // AT4G09040 // AT4G25…	Exist
GO:0008652	P	cellular amino acid biosynthetic process	41	454	503	28397	1.4e-16	2.8e-14	// AT3G58990 // AT1G15710 // AT3G12780 // AT4G02770 // AT2G22230 // AT4G23600 // AT1G31330 // AT2G05920 // AT3G54640 // AT1G14810 // AT1G20340 // AT2G31670 // AT5G18660 // AT3G26060 // AT1G15810 // AT3G18680 // AT5G66120 // AT1G18500 // AT1G58080 // AT3G13110 // AT1G66430 // AT1G54780 // AT1G29900 // AT1G55670 // AT2G43090 // AT1G67740 // AT1G32060 // AT3G51820 // AT4G23670 // AT3G23940 // AT1G63…	Exist
GO:0006519	P	cellular amino acid and derivative metabolic process	67	454	1324	28397	3.2e-16	6.3e-14	// AT3G58990 // AT1G15710 // AT3G54660 // AT3G12780 // AT4G02770 // AT2G22230 // AT4G23600 // AT1G31330 // AT2G05920 // AT3G62120 // AT1G14810 // AT3G48560 // AT2G31670 // AT5G18660 // AT3G26060 // AT1G15810 // AT5G12860 // AT4G19170 // AT4G25130 // AT2G43090 // AT3G18680 // AT4G36220 // AT5G27470 // AT5G66120 // AT1G18500 // AT1G58080 // AT1G06000 // AT2G26080 // AT3G13110 // AT1G66430 // AT1G54…	NA
GO:0009308	P	amine metabolic process	58	454	1034	28397	5.8e-16	1e-13	// AT3G58990 // AT1G15710 // AT3G12780 // AT4G02770 // AT2G22230 // AT4G23600 // AT1G31330 // AT2G05920 // AT3G62120 // AT1G14810 // AT3G48560 // AT2G31670 // AT5G18660 // AT3G26060 // AT1G15810 // AT5G12860 // AT4G25130 // AT2G43090 // AT3G18680 // AT5G27470 // AT5G66120 // AT1G18500 // AT1G58080 // AT2G26080 // AT3G13110 // AT1G66430 // AT1G54780 // AT2G40660 // AT1G29900 // AT1G55670 // AT1G75…	NA
GO:0009309	P	amine biosynthetic process	41	454	527	28397	6.2e-16	1e-13	// AT3G58990 // AT1G15710 // AT3G12780 // AT4G02770 // AT2G22230 // AT4G23600 // AT1G31330 // AT2G05920 // AT3G54640 // AT1G14810 // AT1G20340 // AT2G31670 // AT5G18660 // AT3G26060 // AT1G15810 // AT3G18680 // AT5G66120 // AT1G18500 // AT1G58080 // AT3G13110 // AT1G66430 // AT1G54780 // AT1G29900 // AT1G55670 // AT2G43090 // AT1G67740 // AT1G32060 // AT3G51820 // AT4G23670 // AT3G23940 // AT1G63…	NA
GO:0006006	P	glucose metabolic process	42	454	554	28397	6.2e-16	1e-13	// AT1G10960 // AT5G36120 // AT4G32260 // AT1G75690 // AT3G51820 // AT5G62350 // AT5G18660 // AT3G27925 // AT4G24620 // AT3G12780 // AT3G61870 // AT3G11830 // AT5G27470 // AT5G50250 // AT2G46505 // AT2G43090 // AT1G14345 // AT3G22110 // AT2G24090 // AT5G06600 // AT5G42270 // AT1G32060 // AT3G01500 // AT1G29900 // AT1G53240 // AT1G20696 // AT5G52780 // AT1G29880 // AT3G23700 // AT1G63970 // AT5G06…	NA
GO:0006007	P	glucose catabolic process	39	454	474	28397	5.9e-16	1e-13	// AT5G36120 // AT4G32260 // AT1G75690 // AT3G51820 // AT5G62350 // AT5G18660 // AT3G27925 // AT4G24620 // AT3G12780 // AT3G61870 // AT3G11830 // AT5G27470 // AT5G50250 // AT2G46505 // AT2G43090 // AT1G14345 // AT3G22110 // AT2G24090 // AT5G06600 // AT5G42270 // AT1G32060 // AT3G01500 // AT5G62220 // AT1G53240 // AT1G20696 // AT5G52780 // AT3G23700 // AT1G63970 // AT5G06290 // AT3G22960 // AT2G01…	NA
GO:0019320	P	hexose catabolic process	39	454	476	28397	6.8e-16	1.1e-13	// AT5G36120 // AT4G32260 // AT1G75690 // AT3G51820 // AT5G62350 // AT5G18660 // AT3G27925 // AT4G24620 // AT3G12780 // AT3G61870 // AT3G11830 // AT5G27470 // AT5G50250 // AT2G46505 // AT2G43090 // AT1G14345 // AT3G22110 // AT2G24090 // AT5G06600 // AT5G42270 // AT1G32060 // AT3G01500 // AT5G62220 // AT1G53240 // AT1G20696 // AT5G52780 // AT3G23700 // AT1G63970 // AT5G06290 // AT3G22960 // AT2G01…	NA
GO:0046365	P	monosaccharide catabolic process	39	454	480	28397	8.7e-16	1.3e-13	// AT5G36120 // AT4G32260 // AT1G75690 // AT3G51820 // AT5G62350 // AT5G18660 // AT3G27925 // AT4G24620 // AT3G12780 // AT3G61870 // AT3G11830 // AT5G27470 // AT5G50250 // AT2G46505 // AT2G43090 // AT1G14345 // AT3G22110 // AT2G24090 // AT5G06600 // AT5G42270 // AT1G32060 // AT3G01500 // AT5G62220 // AT1G53240 // AT1G20696 // AT5G52780 // AT3G23700 // AT1G63970 // AT5G06290 // AT3G22960 // AT2G01…	NA
GO:0046394	P	carboxylic acid biosynthetic process	60	454	1116	28397	1.1e-15	1.5e-13	// AT3G58990 // AT1G15710 // AT3G12780 // AT4G02770 // AT2G22230 // AT4G23600 // AT1G31330 // AT2G05920 // AT3G54640 // AT1G14810 // AT1G20340 // AT2G31670 // AT5G18660 // AT3G26060 // AT1G15810 // AT1G67730 // AT2G37220 // AT3G18680 // AT3G25770 // AT4G05160 // AT5G66120 // AT1G18500 // AT1G58080 // AT5G08410 // AT5G50250 // AT4G32260 // AT5G14740 // AT3G13110 // AT1G66430 // AT1G54780 // AT1G29…	Exist
GO:0016053	P	organic acid biosynthetic process	60	454	1116	28397	1.1e-15	1.5e-13	// AT3G58990 // AT1G15710 // AT3G12780 // AT4G02770 // AT2G22230 // AT4G23600 // AT1G31330 // AT2G05920 // AT3G54640 // AT1G14810 // AT1G20340 // AT2G31670 // AT5G18660 // AT3G26060 // AT1G15810 // AT1G67730 // AT2G37220 // AT3G18680 // AT3G25770 // AT4G05160 // AT5G66120 // AT1G18500 // AT1G58080 // AT5G08410 // AT5G50250 // AT4G32260 // AT5G14740 // AT3G13110 // AT1G66430 // AT1G54780 // AT1G29…	Exist
GO:0044271	P	cellular nitrogen compound biosynthetic process	50	454	804	28397	1.6e-15	2.3e-13	// AT3G58990 // AT1G15710 // AT3G12780 // AT4G02770 // AT2G22230 // AT4G23600 // AT1G31330 // AT2G05920 // AT3G54640 // AT1G14810 // AT1G20340 // AT2G31670 // AT5G18660 // AT3G26060 // AT1G15810 // AT1G32990 // AT2G43090 // AT3G18680 // AT3G61870 // AT5G66120 // AT1G18500 // AT1G58080 // AT3G13110 // AT1G66430 // AT1G54780 // AT1G29900 // AT1G55670 // AT2G41680 // AT5G01750 // AT1G67740 // AT1G32…	NA
GO:0046164	P	alcohol catabolic process	39	454	491	28397	1.7e-15	2.4e-13	// AT5G36120 // AT4G32260 // AT1G75690 // AT3G51820 // AT5G62350 // AT5G18660 // AT3G27925 // AT4G24620 // AT3G12780 // AT3G61870 // AT3G11830 // AT5G27470 // AT5G50250 // AT2G46505 // AT2G43090 // AT1G14345 // AT3G22110 // AT2G24090 // AT5G06600 // AT5G42270 // AT1G32060 // AT3G01500 // AT5G62220 // AT1G53240 // AT1G20696 // AT5G52780 // AT3G23700 // AT1G63970 // AT5G06290 // AT3G22960 // AT2G01…	NA
GO:0044248	P	cellular catabolic process	86	454	2095	28397	1.8e-15	2.4e-13	// AT3G54660 // AT5G05200 // AT5G36120 // AT1G75690 // AT2G41680 // AT3G51820 // AT4G24620 // AT3G12780 // AT2G26080 // AT5G50250 // AT2G47730 // AT2G43090 // AT5G62220 // AT1G13060 // AT3G44880 // AT2G01290 // AT1G20696 // AT2G05710 // AT1G20340 // AT3G17210 // AT3G10670 // AT3G19860 // AT3G49220 // AT5G08280 // AT1G24100 // AT1G15710 // AT4G32260 // AT1G60870 // AT5G18660 // AT4G25130 // AT2G46…	Exist
GO:0019318	P	hexose metabolic process	43	454	602	28397	2e-15	2.5e-13	// AT1G10960 // AT5G36120 // AT4G32260 // AT1G75690 // AT3G51820 // AT5G62350 // AT5G18660 // AT3G27925 // AT4G24620 // AT3G12780 // AT3G61870 // AT3G11830 // AT5G27470 // AT5G50250 // AT2G46505 // AT2G43090 // AT1G14345 // AT3G22110 // AT2G24090 // AT1G07110 // AT5G06600 // AT5G42270 // AT1G32060 // AT3G01500 // AT1G29900 // AT1G53240 // AT1G20696 // AT5G52780 // AT1G29880 // AT3G23700 // AT1G63…	NA
GO:0044283	P	small molecule biosynthetic process	80	454	1865	28397	2.2e-15	2.6e-13	// AT3G58990 // AT1G15710 // AT1G10960 // AT3G12780 // AT4G02770 // AT2G22230 // AT2G05710 // AT1G31330 // AT2G05920 // AT4G38550 // AT3G54640 // AT1G14810 // AT3G48560 // AT2G31670 // AT5G18660 // AT1G22850 // AT3G26060 // AT1G15810 // AT1G67730 // AT4G19170 // AT2G37220 // AT2G43090 // AT3G18680 // AT4G24620 // AT3G25770 // AT3G11830 // AT4G36220 // AT4G05160 // AT5G27470 // AT5G66120 // AT1G18…	Exist
GO:0009056	P	catabolic process	88	454	2182	28397	2.2e-15	2.6e-13	// AT3G54660 // AT5G05200 // AT5G36120 // AT2G22230 // AT1G75690 // AT2G41680 // AT3G51820 // AT4G24620 // AT3G12780 // AT2G26080 // AT5G50250 // AT2G47730 // AT2G43090 // AT5G62220 // AT1G13060 // AT3G44880 // AT2G01290 // AT1G20696 // AT2G05710 // AT1G20340 // AT3G17210 // AT3G10670 // AT3G19860 // AT3G49220 // AT5G08280 // AT1G24100 // AT1G15710 // AT4G32260 // AT1G60870 // AT5G18660 // AT4G25…	Exist
GO:0006733	P	oxidoreduction coenzyme metabolic process	29	454	267	28397	5.7e-15	6.7e-13	// AT1G10960 // AT5G36120 // AT2G22230 // AT1G75690 // AT3G51820 // AT5G18660 // AT3G27925 // AT3G12780 // AT3G61870 // AT5G66120 // AT5G50250 // AT4G32260 // AT5G42270 // AT1G14345 // AT1G55670 // AT2G24090 // AT1G32060 // AT3G01500 // AT2G01290 // AT5G52780 // AT3G23700 // AT1G63970 // AT5G06290 // AT4G23600 // AT1G20340 // AT1G76450 // AT2G30200 // AT5G14040 // AT5G08280	Exist
GO:0044238	P	primary metabolic process	269	454	11717	28397	1.5e-14	1.7e-12	// AT1G33240 // AT3G54660 // AT5G05200 // AT5G36120 // AT2G22230 // AT1G75690 // AT2G41680 // AT3G47520 // AT3G62120 // AT3G51820 // AT4G39960 // AT1G67840 // AT1G76880 // AT1G30210 // AT4G24620 // AT4G36870 // AT3G18680 // AT5G42750 // AT4G00895 // AT5G57180 // AT5G58330 // AT5G66120 // AT1G18500 // AT3G14240 // AT1G62850 // AT5G50250 // AT2G47730 // AT2G43090 // AT1G54780 // AT1G10830 // AT4G09…	Exist
GO:0009058	P	biosynthetic process	204	454	7962	28397	2.2e-14	2.5e-12	// AT1G33240 // AT5G05200 // AT5G36120 // AT2G22230 // AT2G41680 // AT3G45160 // AT3G62120 // AT3G51820 // AT1G67840 // AT1G76880 // AT1G30210 // AT4G24620 // AT4G36870 // AT3G18680 // AT5G42750 // AT4G00895 // AT5G57180 // AT5G58330 // AT5G66120 // AT1G18500 // AT1G62850 // AT5G50250 // AT2G47730 // AT2G43090 // AT1G54780 // AT1G10830 // AT4G20360 // AT4G25890 // AT2G02070 // AT3G07430 // AT3G44…	Exist
GO:0006740	P	NADPH regeneration	25	454	201	28397	2.7e-14	3e-12	// AT5G36120 // AT4G32260 // AT1G75690 // AT3G51820 // AT5G18660 // AT3G27925 // AT3G12780 // AT3G61870 // AT5G50250 // AT5G42270 // AT1G14345 // AT1G55670 // AT2G24090 // AT1G32060 // AT3G01500 // AT2G01290 // AT5G52780 // AT3G23700 // AT1G63970 // AT5G06290 // AT1G20340 // AT1G76450 // AT1G10960 // AT5G14040 // AT5G08280	NA
GO:0006790	P	sulfur metabolic process	44	454	683	28397	2.8e-14	3e-12	// AT3G58990 // AT3G54660 // AT4G27520 // AT3G12780 // AT4G02770 // AT2G22230 // AT4G23600 // AT1G31330 // AT2G05920 // AT1G14810 // AT1G20340 // AT2G31670 // AT5G18660 // AT3G26060 // AT1G19920 // AT3G27925 // AT1G58080 // AT5G08410 // AT4G32260 // AT3G13110 // AT1G66430 // AT1G54780 // AT1G55670 // AT5G58330 // AT5G42270 // AT1G16410 // AT1G67740 // AT1G32060 // AT1G15810 // AT3G51820 // AT4G23…	NA
GO:0006739	P	NADP metabolic process	25	454	204	28397	3.7e-14	3.9e-12	// AT5G36120 // AT4G32260 // AT1G75690 // AT3G51820 // AT5G18660 // AT3G27925 // AT3G12780 // AT3G61870 // AT5G50250 // AT5G42270 // AT1G14345 // AT1G55670 // AT2G24090 // AT1G32060 // AT3G01500 // AT2G01290 // AT5G52780 // AT3G23700 // AT1G63970 // AT5G06290 // AT1G20340 // AT1G76450 // AT1G10960 // AT5G14040 // AT5G08280	NA
GO:0044275	P	cellular carbohydrate catabolic process	39	454	545	28397	4.1e-14	4e-12	// AT5G36120 // AT4G32260 // AT1G75690 // AT3G51820 // AT5G62350 // AT5G18660 // AT3G27925 // AT4G24620 // AT3G12780 // AT3G61870 // AT3G11830 // AT5G27470 // AT5G50250 // AT2G46505 // AT2G43090 // AT1G14345 // AT3G22110 // AT2G24090 // AT5G06600 // AT5G42270 // AT1G32060 // AT3G01500 // AT5G62220 // AT1G53240 // AT1G20696 // AT5G52780 // AT3G23700 // AT1G63970 // AT5G06290 // AT3G22960 // AT2G01…	NA
GO:0016052	P	carbohydrate catabolic process	40	454	573	28397	4e-14	4e-12	// AT5G36120 // AT2G22230 // AT1G75690 // AT3G51820 // AT5G62350 // AT5G18660 // AT3G27925 // AT4G24620 // AT3G12780 // AT3G61870 // AT2G46505 // AT5G27470 // AT5G50250 // AT4G32260 // AT2G43090 // AT1G14345 // AT3G22110 // AT2G24090 // AT5G06600 // AT3G11830 // AT5G42270 // AT1G32060 // AT3G01500 // AT5G62220 // AT1G53240 // AT1G20696 // AT5G52780 // AT3G23700 // AT1G63970 // AT5G06290 // AT3G22…	NA
GO:0009069	P	serine family amino acid metabolic process	28	454	271	28397	5.3e-14	5.1e-12	// AT4G02770 // AT3G12780 // AT2G22230 // AT4G23600 // AT1G31330 // AT3G51820 // AT2G31670 // AT5G18660 // AT3G26060 // AT4G25130 // AT1G58080 // AT2G26080 // AT3G13110 // AT1G66430 // AT1G54780 // AT1G55670 // AT1G67740 // AT1G32060 // AT4G23670 // AT1G63970 // AT3G52500 // AT2G43100 // AT4G34200 // AT5G13120 // AT1G76100 // AT1G20340 // AT3G10670 // AT5G08280	NA
GO:0046496	P	nicotinamide nucleotide metabolic process	25	454	212	28397	8.2e-14	7.7e-12	// AT5G36120 // AT4G32260 // AT1G75690 // AT3G51820 // AT5G18660 // AT3G27925 // AT3G12780 // AT3G61870 // AT5G50250 // AT5G42270 // AT1G14345 // AT1G55670 // AT2G24090 // AT1G32060 // AT3G01500 // AT2G01290 // AT5G52780 // AT3G23700 // AT1G63970 // AT5G06290 // AT1G20340 // AT1G76450 // AT1G10960 // AT5G14040 // AT5G08280	Exist
GO:0006769	P	nicotinamide metabolic process	25	454	212	28397	8.2e-14	7.7e-12	// AT5G36120 // AT4G32260 // AT1G75690 // AT3G51820 // AT5G18660 // AT3G27925 // AT3G12780 // AT3G61870 // AT5G50250 // AT5G42270 // AT1G14345 // AT1G55670 // AT2G24090 // AT1G32060 // AT3G01500 // AT2G01290 // AT5G52780 // AT3G23700 // AT1G63970 // AT5G06290 // AT1G20340 // AT1G76450 // AT1G10960 // AT5G14040 // AT5G08280	NA
GO:0006090	P	pyruvate metabolic process	33	454	398	28397	9.2e-14	8.4e-12	// AT3G12780 // AT4G23600 // AT2G41680 // AT3G51820 // AT5G18660 // AT1G68590 // AT3G52150 // AT4G24620 // AT1G32990 // AT3G61870 // AT5G43750 // AT5G27470 // AT5G08280 // AT5G50250 // AT3G11830 // AT1G54780 // AT1G14345 // AT3G22110 // AT1G01080 // AT1G29900 // AT1G53240 // AT5G45390 // AT1G29880 // AT3G23700 // AT1G63970 // AT1G44920 // AT2G47590 // AT2G05710 // AT1G26630 // AT3G17210 // AT1G56…	Exist
GO:0019362	P	pyridine nucleotide metabolic process	25	454	214	28397	1e-13	8.9e-12	// AT5G36120 // AT4G32260 // AT1G75690 // AT3G51820 // AT5G18660 // AT3G27925 // AT3G12780 // AT3G61870 // AT5G50250 // AT5G42270 // AT1G14345 // AT1G55670 // AT2G24090 // AT1G32060 // AT3G01500 // AT2G01290 // AT5G52780 // AT3G23700 // AT1G63970 // AT5G06290 // AT1G20340 // AT1G76450 // AT1G10960 // AT5G14040 // AT5G08280	Exist
GO:0032787	P	monocarboxylic acid metabolic process	66	454	1481	28397	1.7e-13	1.5e-11	// AT1G10960 // AT3G12780 // AT2G22230 // AT4G23600 // AT2G41680 // AT3G54640 // AT3G51820 // AT5G19240 // AT5G18660 // AT5G43280 // AT1G68590 // AT3G52150 // AT3G54690 // AT1G32990 // AT5G19590 // AT2G37220 // AT4G24620 // AT3G25770 // AT3G61870 // AT3G11830 // AT4G05160 // AT5G27470 // AT1G67730 // AT5G08280 // AT5G50250 // AT4G32260 // AT5G14740 // AT3G17210 // AT3G13110 // AT1G66430 // AT1G54…	Exist
GO:0006098	P	pentose-phosphate shunt	24	454	200	28397	1.8e-13	1.6e-11	// AT5G36120 // AT4G32260 // AT1G75690 // AT3G51820 // AT5G18660 // AT3G27925 // AT3G12780 // AT3G61870 // AT5G50250 // AT5G42270 // AT1G14345 // AT2G24090 // AT1G32060 // AT3G01500 // AT2G01290 // AT5G52780 // AT3G23700 // AT1G63970 // AT5G06290 // AT1G20340 // AT1G76450 // AT1G10960 // AT5G14040 // AT5G08280	NA
GO:0043603	P	cellular amide metabolic process	25	454	222	28397	2.1e-13	1.8e-11	// AT5G36120 // AT4G32260 // AT1G75690 // AT3G51820 // AT5G18660 // AT3G27925 // AT3G12780 // AT3G61870 // AT5G50250 // AT5G42270 // AT1G14345 // AT1G55670 // AT2G24090 // AT1G32060 // AT3G01500 // AT2G01290 // AT5G52780 // AT3G23700 // AT1G63970 // AT5G06290 // AT1G20340 // AT1G76450 // AT1G10960 // AT5G14040 // AT5G08280	NA
GO:0009820	P	alkaloid metabolic process	25	454	225	28397	2.8e-13	2.3e-11	// AT5G36120 // AT4G32260 // AT1G75690 // AT3G51820 // AT5G18660 // AT3G27925 // AT3G12780 // AT3G61870 // AT5G50250 // AT5G42270 // AT1G14345 // AT1G55670 // AT2G24090 // AT1G32060 // AT3G01500 // AT2G01290 // AT5G52780 // AT3G23700 // AT1G63970 // AT5G06290 // AT1G20340 // AT1G76450 // AT1G10960 // AT5G14040 // AT5G08280	NA
GO:0044249	P	cellular biosynthetic process	196	454	7737	28397	3.7e-13	2.9e-11	// AT1G33240 // AT5G05200 // AT5G36120 // AT2G22230 // AT2G41680 // AT3G45160 // AT3G62120 // AT3G51820 // AT1G67840 // AT1G76880 // AT1G30210 // AT4G24620 // AT4G36870 // AT3G18680 // AT5G42750 // AT4G00895 // AT5G57180 // AT5G58330 // AT5G66120 // AT1G18500 // AT1G62850 // AT5G50250 // AT2G47730 // AT2G43090 // AT1G54780 // AT1G10830 // AT4G20360 // AT4G25890 // AT2G02070 // AT3G07430 // AT3G44…	Exist
GO:0016051	P	carbohydrate biosynthetic process	54	454	1070	28397	3.7e-13	2.9e-11	// AT1G16410 // AT3G51510 // AT5G05200 // AT5G36120 // AT3G58990 // AT2G22230 // AT4G23600 // AT2G41680 // AT5G58330 // AT2G31670 // AT1G22850 // AT3G26060 // AT3G27925 // AT4G24620 // AT3G54920 // AT4G27520 // AT2G35960 // AT3G12780 // AT3G11830 // AT5G27470 // AT5G50250 // AT4G32260 // AT3G13110 // AT1G66430 // AT1G54780 // AT3G22110 // AT5G42270 // AT3G46970 // AT5G06700 // AT4G24930 // AT1G29…	Exist
GO:0016043	P	cellular component organization	105	454	3141	28397	3.7e-13	2.9e-11	// AT1G33240 // AT3G54660 // AT5G36120 // AT2G22230 // AT1G75690 // AT2G41680 // AT3G51820 // AT4G32530 // AT1G30210 // AT3G18680 // AT3G12780 // AT3G18035 // AT5G50250 // AT2G43090 // AT1G54780 // AT2G02070 // AT3G07430 // AT3G44880 // AT1G20696 // AT1G62850 // AT1G77490 // AT2G05710 // AT1G20340 // AT3G56900 // AT5G46290 // AT3G10670 // AT3G19860 // AT5G52440 // AT4G23800 // AT1G53230 // AT4G32…	Exist
GO:0008152	P	metabolic process	295	454	13633	28397	3.8e-13	2.9e-11	// AT1G33240 // AT3G54660 // AT2G39020 // AT5G36120 // AT2G22230 // AT1G75690 // AT2G41680 // AT3G47520 // AT3G62120 // AT3G51820 // AT4G39960 // AT1G67840 // AT4G30920 // AT1G76880 // AT1G30210 // AT4G24620 // AT4G36870 // AT5G05200 // AT3G18680 // AT5G42750 // AT4G00895 // AT2G11890 // AT5G58330 // AT5G66120 // AT1G18500 // AT3G14240 // AT1G62850 // AT5G50250 // AT2G47730 // AT2G43090 // AT1G54…	Exist
GO:0010027	P	thylakoid membrane organization	23	454	198	28397	1.1e-12	8.2e-11	// AT1G53230 // AT5G36120 // AT2G41680 // AT3G51820 // AT1G30210 // AT1G32990 // AT3G18680 // AT3G12780 // AT3G61870 // AT5G43750 // AT5G50250 // AT3G44880 // AT5G45390 // AT3G23700 // AT1G63970 // AT5G06290 // AT1G77490 // AT1G44920 // AT1G76450 // AT5G13510 // AT3G10670 // AT3G52380 // AT5G52440	Exist
GO:0009668	P	plastid membrane organization	23	454	198	28397	1.1e-12	8.2e-11	// AT1G53230 // AT5G36120 // AT2G41680 // AT3G51820 // AT1G30210 // AT1G32990 // AT3G18680 // AT3G12780 // AT3G61870 // AT5G43750 // AT5G50250 // AT3G44880 // AT5G45390 // AT3G23700 // AT1G63970 // AT5G06290 // AT1G77490 // AT1G44920 // AT1G76450 // AT5G13510 // AT3G10670 // AT3G52380 // AT5G52440	Exist
GO:0009070	P	serine family amino acid biosynthetic process	24	454	222	28397	1.4e-12	1.1e-10	// AT4G02770 // AT3G12780 // AT2G22230 // AT1G31330 // AT3G51820 // AT2G31670 // AT5G18660 // AT3G26060 // AT1G58080 // AT3G13110 // AT1G66430 // AT1G54780 // AT1G55670 // AT1G67740 // AT1G32060 // AT4G23670 // AT1G63970 // AT2G43100 // AT4G34200 // AT5G13120 // AT1G76100 // AT1G20340 // AT3G10670 // AT5G08280	NA
GO:0006996	P	organelle organization	78	454	2044	28397	1.8e-12	1.3e-10	// AT4G02770 // AT4G23800 // AT3G54660 // AT5G36120 // AT1G21880 // AT4G32260 // AT1G75690 // AT2G41680 // AT3G51820 // AT5G58330 // AT5G62350 // AT3G23400 // AT1G53230 // AT2G20760 // AT2G39140 // AT4G32530 // AT5G45550 // AT1G30210 // AT1G32990 // AT5G19590 // AT4G32551 // AT2G37470 // AT3G18680 // AT1G47200 // AT3G21055 // AT3G61870 // AT5G43750 // AT3G07100 // AT3G18035 // AT5G50250 // AT2G38…	Exist
GO:0006732	P	coenzyme metabolic process	35	454	508	28397	2.4e-12	1.7e-10	// AT4G23800 // AT3G54660 // AT1G10960 // AT5G36120 // AT2G22230 // AT1G75690 // AT3G51820 // AT2G14890 // AT3G27925 // AT3G12780 // AT3G61870 // AT2G46505 // AT5G66120 // AT5G08410 // AT5G50250 // AT4G32260 // AT5G42270 // AT1G14345 // AT1G55670 // AT2G24090 // AT1G32060 // AT3G01500 // AT2G01290 // AT5G52780 // AT3G23700 // AT1G63970 // AT5G06290 // AT5G16390 // AT5G18660 // AT4G23600 // AT1G20…	Exist
GO:0019288	P	isopentenyl diphosphate biosynthetic process, mevalonate-independent pathway	24	454	229	28397	2.6e-12	1.8e-10	// AT3G12780 // AT2G41680 // AT3G51820 // AT5G18660 // AT1G68590 // AT3G52150 // AT4G24620 // AT1G32990 // AT3G61870 // AT5G43750 // AT5G50250 // AT1G54780 // AT1G14345 // AT1G01080 // AT5G45390 // AT3G23700 // AT1G63970 // AT1G44920 // AT2G47590 // AT4G23600 // AT3G17210 // AT3G52380 // AT3G15520 // AT5G08280	NA
GO:0019344	P	cysteine biosynthetic process	23	454	210	28397	3.3e-12	2.3e-10	// AT4G02770 // AT3G12780 // AT2G22230 // AT1G31330 // AT3G51820 // AT2G31670 // AT5G18660 // AT3G26060 // AT1G58080 // AT3G13110 // AT1G66430 // AT1G54780 // AT1G55670 // AT1G67740 // AT1G32060 // AT4G23670 // AT1G63970 // AT2G43100 // AT5G13120 // AT1G76100 // AT1G20340 // AT3G10670 // AT5G08280	NA
GO:0019682	P	glyceraldehyde-3-phosphate metabolic process	24	454	232	28397	3.4e-12	2.3e-10	// AT3G12780 // AT2G41680 // AT3G51820 // AT5G18660 // AT1G68590 // AT3G52150 // AT4G24620 // AT1G32990 // AT3G61870 // AT5G43750 // AT5G50250 // AT1G54780 // AT1G14345 // AT1G01080 // AT5G45390 // AT3G23700 // AT1G63970 // AT1G44920 // AT2G47590 // AT4G23600 // AT3G17210 // AT3G52380 // AT3G15520 // AT5G08280	NA
GO:0009240	P	isopentenyl diphosphate biosynthetic process	24	454	233	28397	3.7e-12	2.4e-10	// AT3G12780 // AT2G41680 // AT3G51820 // AT5G18660 // AT1G68590 // AT3G52150 // AT4G24620 // AT1G32990 // AT3G61870 // AT5G43750 // AT5G50250 // AT1G54780 // AT1G14345 // AT1G01080 // AT5G45390 // AT3G23700 // AT1G63970 // AT1G44920 // AT2G47590 // AT4G23600 // AT3G17210 // AT3G52380 // AT3G15520 // AT5G08280	NA
GO:0046490	P	isopentenyl diphosphate metabolic process	24	454	233	28397	3.7e-12	2.4e-10	// AT3G12780 // AT2G41680 // AT3G51820 // AT5G18660 // AT1G68590 // AT3G52150 // AT4G24620 // AT1G32990 // AT3G61870 // AT5G43750 // AT5G50250 // AT1G54780 // AT1G14345 // AT1G01080 // AT5G45390 // AT3G23700 // AT1G63970 // AT1G44920 // AT2G47590 // AT4G23600 // AT3G17210 // AT3G52380 // AT3G15520 // AT5G08280	NA
GO:0006534	P	cysteine metabolic process	23	454	213	28397	4.3e-12	2.8e-10	// AT4G02770 // AT3G12780 // AT2G22230 // AT1G31330 // AT3G51820 // AT2G31670 // AT5G18660 // AT3G26060 // AT1G58080 // AT3G13110 // AT1G66430 // AT1G54780 // AT1G55670 // AT1G67740 // AT1G32060 // AT4G23670 // AT1G63970 // AT2G43100 // AT5G13120 // AT1G76100 // AT1G20340 // AT3G10670 // AT5G08280	NA
GO:0019761	P	glucosinolate biosynthetic process	21	454	172	28397	4.5e-12	2.8e-10	// AT1G16410 // AT3G58990 // AT3G26060 // AT4G27520 // AT3G12780 // AT2G43100 // AT4G32260 // AT4G24930 // AT4G23600 // AT4G34950 // AT5G58330 // AT2G31670 // AT2G31790 // AT3G13110 // AT5G42270 // AT1G54780 // AT3G27925 // AT3G10670 // AT3G45160 // AT1G24100 // AT5G06290	NA
GO:0016144	P	S-glycoside biosynthetic process	21	454	172	28397	4.5e-12	2.8e-10	// AT1G16410 // AT3G58990 // AT3G26060 // AT4G27520 // AT3G12780 // AT2G43100 // AT4G32260 // AT4G24930 // AT4G23600 // AT4G34950 // AT5G58330 // AT2G31670 // AT2G31790 // AT3G13110 // AT5G42270 // AT1G54780 // AT3G27925 // AT3G10670 // AT3G45160 // AT1G24100 // AT5G06290	NA
GO:0019758	P	glycosinolate biosynthetic process	21	454	172	28397	4.5e-12	2.8e-10	// AT1G16410 // AT3G58990 // AT3G26060 // AT4G27520 // AT3G12780 // AT2G43100 // AT4G32260 // AT4G24930 // AT4G23600 // AT4G34950 // AT5G58330 // AT2G31670 // AT2G31790 // AT3G13110 // AT5G42270 // AT1G54780 // AT3G27925 // AT3G10670 // AT3G45160 // AT1G24100 // AT5G06290	NA
GO:0032268	P	regulation of cellular protein metabolic process	23	454	215	28397	5.1e-12	3.1e-10	// AT4G02770 // AT1G53230 // AT4G32260 // AT1G75690 // AT1G30210 // AT3G21055 // AT4G19110 // AT1G54780 // AT2G02070 // AT4G14220 // AT1G75460 // AT1G67740 // AT5G54630 // AT1G32060 // AT1G69690 // AT5G45390 // AT1G03600 // AT1G03130 // AT1G76100 // AT1G20340 // AT1G26630 // AT5G13510 // AT3G10670	NA
GO:0006081	P	cellular aldehyde metabolic process	28	454	334	28397	5.7e-12	3.4e-10	// AT3G12780 // AT2G41680 // AT3G51820 // AT5G18660 // AT1G68590 // AT3G52150 // AT4G24620 // AT1G32990 // AT3G61870 // AT5G43750 // AT5G50250 // AT5G14740 // AT1G54780 // AT1G14345 // AT1G13270 // AT1G01080 // AT5G45390 // AT3G23700 // AT1G63970 // AT1G44920 // AT2G47590 // AT3G54690 // AT4G23600 // AT3G17210 // AT3G52380 // AT3G15520 // AT5G09590 // AT5G08280	Exist
GO:0034637	P	cellular carbohydrate biosynthetic process	48	454	941	28397	5.8e-12	3.5e-10	// AT1G16410 // AT3G51510 // AT5G05200 // AT5G36120 // AT3G58990 // AT4G32260 // AT4G23600 // AT2G41680 // AT5G58330 // AT2G31670 // AT1G22850 // AT3G26060 // AT3G27925 // AT4G24620 // AT4G27520 // AT2G35960 // AT3G12780 // AT5G27470 // AT5G50250 // AT3G11830 // AT3G13110 // AT1G66430 // AT1G54780 // AT3G22110 // AT5G42270 // AT3G46970 // AT5G06700 // AT4G24930 // AT1G29900 // AT1G53240 // AT1G29…	NA
GO:0010207	P	photosystem II assembly	21	454	177	28397	7.4e-12	4.4e-10	// AT4G02770 // AT3G61870 // AT3G21055 // AT1G75460 // AT4G32260 // AT1G75690 // AT1G14345 // AT1G67740 // AT1G32060 // AT5G52780 // AT5G13510 // AT4G33480 // AT3G10670 // AT1G54780 // AT5G45390 // AT3G16140 // AT1G19740 // AT2G32480 // AT5G58330 // AT1G05140 // AT1G03600	Exist
GO:0009117	P	nucleotide metabolic process	40	454	685	28397	8.1e-12	4.7e-10	// AT5G36120 // AT4G32260 // AT1G75690 // AT1G14810 // AT5G18660 // AT3G27925 // AT3G61240 // AT5G23070 // AT3G18680 // AT4G00895 // AT3G12780 // AT3G61870 // AT5G27470 // AT2G18960 // AT5G50250 // AT5G42270 // AT1G14345 // AT5G47210 // AT1G55670 // AT2G24090 // AT3G07430 // AT5G52780 // AT2G40660 // AT4G11010 // AT1G32060 // AT3G01500 // AT5G56280 // AT3G51820 // AT3G23940 // AT3G23700 // AT1G63…	Exist
GO:0006753	P	nucleoside phosphate metabolic process	40	454	687	28397	8.8e-12	5.1e-10	// AT5G36120 // AT4G32260 // AT1G75690 // AT1G14810 // AT5G18660 // AT3G27925 // AT3G61240 // AT5G23070 // AT3G18680 // AT4G00895 // AT3G12780 // AT3G61870 // AT5G27470 // AT2G18960 // AT5G50250 // AT5G42270 // AT1G14345 // AT5G47210 // AT1G55670 // AT2G24090 // AT3G07430 // AT5G52780 // AT2G40660 // AT4G11010 // AT1G32060 // AT3G01500 // AT5G56280 // AT3G51820 // AT3G23940 // AT3G23700 // AT1G63…	Exist
GO:0006364	P	rRNA processing	27	454	324	28397	1.6e-11	8.8e-10	// AT4G02770 // AT4G32260 // AT1G75690 // AT3G51820 // AT5G58330 // AT5G18660 // AT3G26060 // AT1G76450 // AT1G32990 // AT3G18680 // AT3G21055 // AT3G61870 // AT1G54780 // AT4G09730 // AT1G67740 // AT1G32060 // AT5G45390 // AT3G23700 // AT1G63970 // AT1G03600 // AT5G27700 // AT2G39140 // AT1G26630 // AT5G13510 // AT3G10670 // AT3G16140 // AT5G08280	NA
GO:0016072	P	rRNA metabolic process	27	454	325	28397	1.7e-11	9.3e-10	// AT4G02770 // AT4G32260 // AT1G75690 // AT3G51820 // AT5G58330 // AT5G18660 // AT3G26060 // AT1G76450 // AT1G32990 // AT3G18680 // AT3G21055 // AT3G61870 // AT1G54780 // AT4G09730 // AT1G67740 // AT1G32060 // AT5G45390 // AT3G23700 // AT1G63970 // AT1G03600 // AT5G27700 // AT2G39140 // AT1G26630 // AT5G13510 // AT3G10670 // AT3G16140 // AT5G08280	NA
GO:0000097	P	sulfur amino acid biosynthetic process	26	454	309	28397	3.1e-11	1.7e-09	// AT4G02770 // AT3G12780 // AT2G22230 // AT1G31330 // AT2G05920 // AT1G14810 // AT2G31670 // AT5G18660 // AT3G26060 // AT1G15810 // AT1G58080 // AT3G13110 // AT1G66430 // AT1G54780 // AT1G55670 // AT1G67740 // AT1G32060 // AT3G51820 // AT4G23670 // AT1G63970 // AT2G43100 // AT5G13120 // AT1G76100 // AT1G20340 // AT3G10670 // AT5G08280	NA
GO:0051246	P	regulation of protein metabolic process	23	454	237	28397	3.1e-11	1.7e-09	// AT4G02770 // AT1G53230 // AT4G32260 // AT1G75690 // AT1G30210 // AT3G21055 // AT4G19110 // AT1G54780 // AT2G02070 // AT4G14220 // AT1G75460 // AT1G67740 // AT5G54630 // AT1G32060 // AT1G69690 // AT5G45390 // AT1G03600 // AT1G03130 // AT1G76100 // AT1G20340 // AT1G26630 // AT5G13510 // AT3G10670	NA
GO:0019748	P	secondary metabolic process	55	454	1247	28397	3.3e-11	1.8e-09	// AT3G58990 // AT3G54660 // AT4G27520 // AT5G36120 // AT4G32260 // AT1G75690 // AT2G41680 // AT3G51820 // AT5G58330 // AT2G31670 // AT5G18660 // AT3G26060 // AT3G27925 // AT4G19170 // AT3G45160 // AT3G12780 // AT3G61870 // AT4G36220 // AT1G06000 // AT5G50250 // AT3G13110 // AT5G42270 // AT1G54780 // AT1G14345 // AT1G10830 // AT2G47730 // AT2G24090 // AT1G30530 // AT1G16410 // AT1G61740 // AT5G02…	NA
GO:0016138	P	glycoside biosynthetic process	22	454	215	28397	3.3e-11	1.8e-09	// AT3G58990 // AT4G27520 // AT3G12780 // AT4G32260 // AT5G58330 // AT4G34950 // AT3G26060 // AT3G27925 // AT3G13110 // AT5G42270 // AT1G54780 // AT1G66430 // AT1G16410 // AT3G45160 // AT5G06290 // AT2G31670 // AT2G43100 // AT4G23600 // AT2G31790 // AT3G10670 // AT4G24930 // AT1G24100	NA
GO:0035304	P	regulation of protein amino acid dephosphorylation	18	454	135	28397	4.2e-11	2.2e-09	// AT1G75690 // AT4G02770 // AT1G53230 // AT1G67740 // AT3G21055 // AT1G75460 // AT4G32260 // AT1G03130 // AT1G76100 // AT1G32060 // AT5G13510 // AT3G10670 // AT1G54780 // AT5G45390 // AT1G69690 // AT1G30210 // AT4G14220 // AT1G03600	NA
GO:0055086	P	nucleobase, nucleoside and nucleotide metabolic process	40	454	726	28397	4.3e-11	2.3e-09	// AT5G36120 // AT4G32260 // AT1G75690 // AT1G14810 // AT5G18660 // AT3G27925 // AT3G61240 // AT5G23070 // AT3G18680 // AT4G00895 // AT3G12780 // AT3G61870 // AT5G27470 // AT2G18960 // AT5G50250 // AT5G42270 // AT1G14345 // AT5G47210 // AT1G55670 // AT2G24090 // AT3G07430 // AT5G52780 // AT2G40660 // AT4G11010 // AT1G32060 // AT3G01500 // AT5G56280 // AT3G51820 // AT3G23940 // AT3G23700 // AT1G63…	Exist
GO:0034660	P	ncRNA metabolic process	32	454	481	28397	5e-11	2.6e-09	// AT4G02770 // AT4G32260 // AT1G75690 // AT3G62120 // AT3G51820 // AT5G58330 // AT5G18660 // AT3G26060 // AT2G39140 // AT1G32990 // AT3G18680 // AT3G21055 // AT3G61870 // AT5G27470 // AT1G54780 // AT2G40660 // AT4G09730 // AT1G67740 // AT1G32060 // AT5G45390 // AT1G29880 // AT3G23700 // AT1G63970 // AT1G03600 // AT5G27700 // AT4G36390 // AT1G76450 // AT1G26630 // AT5G13510 // AT3G10670 // AT3G16…	NA
GO:0035303	P	regulation of dephosphorylation	18	454	137	28397	5.2e-11	2.6e-09	// AT1G75690 // AT4G02770 // AT1G53230 // AT1G67740 // AT3G21055 // AT1G75460 // AT4G32260 // AT1G03130 // AT1G76100 // AT1G32060 // AT5G13510 // AT3G10670 // AT1G54780 // AT5G45390 // AT1G69690 // AT1G30210 // AT4G14220 // AT1G03600	NA
GO:0016143	P	S-glycoside metabolic process	21	454	205	28397	9.1e-11	4.5e-09	// AT1G16410 // AT3G58990 // AT3G26060 // AT4G27520 // AT3G12780 // AT2G43100 // AT4G32260 // AT4G24930 // AT4G23600 // AT4G34950 // AT5G58330 // AT2G31670 // AT2G31790 // AT3G13110 // AT5G42270 // AT1G54780 // AT3G27925 // AT3G10670 // AT3G45160 // AT1G24100 // AT5G06290	NA
GO:0019757	P	glycosinolate metabolic process	21	454	205	28397	9.1e-11	4.5e-09	// AT1G16410 // AT3G58990 // AT3G26060 // AT4G27520 // AT3G12780 // AT2G43100 // AT4G32260 // AT4G24930 // AT4G23600 // AT4G34950 // AT5G58330 // AT2G31670 // AT2G31790 // AT3G13110 // AT5G42270 // AT1G54780 // AT3G27925 // AT3G10670 // AT3G45160 // AT1G24100 // AT5G06290	NA
GO:0019760	P	glucosinolate metabolic process	21	454	205	28397	9.1e-11	4.5e-09	// AT1G16410 // AT3G58990 // AT3G26060 // AT4G27520 // AT3G12780 // AT2G43100 // AT4G32260 // AT4G24930 // AT4G23600 // AT4G34950 // AT5G58330 // AT2G31670 // AT2G31790 // AT3G13110 // AT5G42270 // AT1G54780 // AT3G27925 // AT3G10670 // AT3G45160 // AT1G24100 // AT5G06290	NA
GO:0044085	P	cellular component biogenesis	60	454	1480	28397	9.7e-11	4.7e-09	// AT4G02770 // AT5G36120 // AT2G22230 // AT1G75690 // AT2G05920 // AT1G17440 // AT3G51820 // AT5G58330 // AT5G18660 // AT3G26060 // AT2G39140 // AT1G32990 // AT1G72020 // AT2G37470 // AT3G18680 // AT5G25060 // AT3G21055 // AT3G61870 // AT2G45470 // AT3G18035 // AT2G28720 // AT4G32260 // AT3G59540 // AT1G54780 // AT1G14345 // AT1G48620 // AT1G21310 // AT2G32480 // AT4G09730 // AT3G06550 // AT5G06…	Exist
GO:0042254	P	ribosome biogenesis	30	454	437	28397	1e-10	4.8e-09	// AT4G02770 // AT4G32260 // AT1G75690 // AT3G51820 // AT5G58330 // AT5G18660 // AT3G26060 // AT1G76450 // AT1G32990 // AT3G18680 // AT3G21055 // AT3G61870 // AT3G59540 // AT1G54780 // AT4G09730 // AT1G67740 // AT1G32060 // AT5G45390 // AT3G23700 // AT1G63970 // AT1G29070 // AT1G03600 // AT5G27700 // AT1G41880 // AT2G39140 // AT1G26630 // AT5G13510 // AT3G10670 // AT3G16140 // AT5G08280	Exist
GO:0010016	P	shoot morphogenesis	33	454	529	28397	1.2e-10	5.7e-09	// AT1G33240 // AT1G53230 // AT5G36120 // AT3G51820 // AT3G04760 // AT5G18660 // AT5G42070 // AT1G68590 // AT1G30210 // AT4G36870 // AT4G32551 // AT3G20680 // AT1G54500 // AT5G08410 // AT5G65930 // AT2G02070 // AT3G24770 // AT1G01080 // AT4G24930 // AT3G44880 // AT1G32060 // AT1G69690 // AT5G54630 // AT1G63970 // AT2G23760 // AT4G23600 // AT1G20340 // AT5G13510 // AT1G67840 // AT3G15520 // AT5G28…	NA
GO:0006807	P	nitrogen compound metabolic process	149	454	5675	28397	1.3e-10	6.3e-09	// AT1G33240 // AT5G05200 // AT5G36120 // AT2G22230 // AT1G75690 // AT2G41680 // AT3G62120 // AT3G51820 // AT1G67840 // AT1G76880 // AT1G30210 // AT4G36870 // AT3G18680 // AT4G00895 // AT5G57180 // AT5G66120 // AT1G18500 // AT2G26080 // AT5G50250 // AT2G43090 // AT1G54780 // AT5G47210 // AT4G09040 // AT3G20810 // AT2G02070 // AT3G07430 // AT1G73840 // AT3G44880 // AT2G01290 // AT1G69690 // AT4G23…	Exist
GO:0034470	P	ncRNA processing	28	454	387	28397	1.4e-10	6.5e-09	// AT4G02770 // AT4G32260 // AT1G75690 // AT3G51820 // AT5G58330 // AT5G18660 // AT3G26060 // AT1G76450 // AT1G32990 // AT3G18680 // AT3G21055 // AT3G61870 // AT1G54780 // AT4G09730 // AT1G67740 // AT1G32060 // AT5G45390 // AT3G23700 // AT1G63970 // AT1G03600 // AT5G27700 // AT4G36390 // AT2G39140 // AT1G26630 // AT5G13510 // AT3G10670 // AT3G16140 // AT5G08280	NA
GO:0022613	P	ribonucleoprotein complex biogenesis	30	454	447	28397	1.7e-10	7.7e-09	// AT4G02770 // AT4G32260 // AT1G75690 // AT3G51820 // AT5G58330 // AT5G18660 // AT3G26060 // AT1G76450 // AT1G32990 // AT3G18680 // AT3G21055 // AT3G61870 // AT3G59540 // AT1G54780 // AT4G09730 // AT1G67740 // AT1G32060 // AT5G45390 // AT3G23700 // AT1G63970 // AT1G29070 // AT1G03600 // AT5G27700 // AT1G41880 // AT2G39140 // AT1G26630 // AT5G13510 // AT3G10670 // AT3G16140 // AT5G08280	Exist
GO:0031399	P	regulation of protein modification process	18	454	150	28397	2e-10	9.1e-09	// AT1G75690 // AT4G02770 // AT1G53230 // AT1G67740 // AT3G21055 // AT1G75460 // AT4G32260 // AT1G03130 // AT1G76100 // AT1G32060 // AT5G13510 // AT3G10670 // AT1G54780 // AT5G45390 // AT1G69690 // AT1G30210 // AT4G14220 // AT1G03600	NA
GO:0046483	P	heterocycle metabolic process	46	454	1023	28397	8.5e-10	3.8e-08	// AT5G05200 // AT4G32260 // AT2G41680 // AT3G54640 // AT3G51820 // AT2G18960 // AT5G19240 // AT5G18660 // AT3G26060 // AT3G27925 // AT1G32990 // AT3G18680 // AT4G00895 // AT3G61870 // AT1G58080 // AT1G06000 // AT5G08410 // AT3G17210 // AT3G13110 // AT1G66430 // AT1G54780 // AT2G40660 // AT5G47210 // AT1G75330 // AT1G30530 // AT3G07430 // AT5G01750 // AT4G13830 // AT3G14067 // AT4G11010 // AT3G44…	NA
GO:0015994	P	chlorophyll metabolic process	19	454	189	28397	9.6e-10	4.3e-08	// AT5G11840 // AT1G32990 // AT4G13830 // AT5G05200 // AT3G61870 // AT3G51820 // AT3G44880 // AT3G14067 // AT5G18660 // AT1G68830 // AT3G26060 // AT1G76450 // AT1G54780 // AT3G27925 // AT3G23700 // AT1G63970 // AT2G41680 // AT5G08280 // AT3G17210	Exist
GO:0006470	P	protein amino acid dephosphorylation	20	454	214	28397	1.1e-09	5e-08	// AT1G75690 // AT4G02770 // AT1G53230 // AT1G67740 // AT3G21055 // AT1G75460 // AT4G32260 // AT1G03130 // AT1G76100 // AT3G44620 // AT1G32060 // AT5G13510 // AT3G10670 // AT1G54780 // AT5G45390 // AT1G69690 // AT1G30210 // AT1G03600 // AT4G14220 // AT1G73840	NA
GO:0034621	P	cellular macromolecular complex subunit organization	34	454	617	28397	1.3e-09	5.8e-08	// AT4G02770 // AT5G36120 // AT4G32260 // AT1G75690 // AT5G58330 // AT1G62850 // AT1G72020 // AT2G37470 // AT3G21055 // AT3G61870 // AT3G18035 // AT2G28720 // AT1G54780 // AT1G14345 // AT1G48620 // AT1G21310 // AT2G32480 // AT1G75460 // AT1G67740 // AT5G11770 // AT1G32060 // AT5G56280 // AT5G45390 // AT5G52780 // AT1G03600 // AT5G13120 // AT2G05710 // AT1G26630 // AT5G13510 // AT4G33480 // AT3G10…	NA
GO:0016137	P	glycoside metabolic process	22	454	268	28397	1.6e-09	6.8e-08	// AT3G58990 // AT4G27520 // AT3G12780 // AT4G32260 // AT5G58330 // AT4G34950 // AT3G26060 // AT3G27925 // AT3G13110 // AT5G42270 // AT1G54780 // AT1G66430 // AT1G16410 // AT3G45160 // AT5G06290 // AT2G31670 // AT2G43100 // AT4G23600 // AT2G31790 // AT3G10670 // AT4G24930 // AT1G24100	NA
GO:0008654	P	phospholipid biosynthetic process	27	454	405	28397	1.6e-09	6.9e-08	// AT3G12780 // AT2G41680 // AT3G51820 // AT5G18660 // AT1G68590 // AT3G52150 // AT4G24620 // AT1G32990 // AT3G61870 // AT5G43750 // AT5G50250 // AT1G54780 // AT1G14345 // AT1G01080 // AT5G45390 // AT3G23700 // AT1G63970 // AT4G36390 // AT1G44920 // AT2G47590 // AT1G01610 // AT3G25660 // AT4G23600 // AT3G17210 // AT3G52380 // AT3G15520 // AT5G08280	NA
GO:0044265	P	cellular macromolecule catabolic process	50	454	1208	28397	2.1e-09	9.2e-08	// AT1G10960 // AT5G36120 // AT4G32260 // AT1G75690 // AT3G51820 // AT5G62350 // AT5G18660 // AT3G27925 // AT4G24620 // AT1G72020 // AT5G25060 // AT3G12780 // AT3G61870 // AT3G11830 // AT5G12230 // AT5G27470 // AT5G50250 // AT2G46505 // AT2G43090 // AT1G14345 // AT3G22110 // AT1G21310 // AT2G24090 // AT5G06290 // AT5G06600 // AT1G13060 // AT5G42270 // AT4G14220 // AT5G11770 // AT1G32060 // AT3G01…	NA
GO:0009057	P	macromolecule catabolic process	51	454	1255	28397	2.6e-09	1.1e-07	// AT1G10960 // AT5G36120 // AT2G22230 // AT1G75690 // AT3G51820 // AT5G62350 // AT5G18660 // AT3G27925 // AT4G24620 // AT1G72020 // AT5G25060 // AT3G12780 // AT3G61870 // AT2G46505 // AT5G12230 // AT5G27470 // AT5G50250 // AT4G32260 // AT2G43090 // AT1G14345 // AT3G22110 // AT1G21310 // AT2G24090 // AT5G06290 // AT5G06600 // AT3G11830 // AT1G13060 // AT5G42270 // AT4G14220 // AT5G11770 // AT1G32…	NA
GO:0042440	P	pigment metabolic process	25	454	361	28397	3.2e-09	1.3e-07	// AT5G05200 // AT2G41680 // AT3G51820 // AT5G18660 // AT3G26060 // AT3G27925 // AT4G19170 // AT1G32990 // AT3G61870 // AT1G06000 // AT3G17210 // AT1G54780 // AT1G10830 // AT1G30530 // AT4G13830 // AT3G14067 // AT1G65060 // AT3G44880 // AT3G23700 // AT1G63970 // AT5G11840 // AT2G47590 // AT1G76450 // AT1G68830 // AT5G08280	Exist
GO:0043933	P	macromolecular complex subunit organization	35	454	691	28397	5.9e-09	2.4e-07	// AT4G02770 // AT5G36120 // AT4G32260 // AT1G75690 // AT1G17440 // AT5G58330 // AT1G62850 // AT1G72020 // AT2G37470 // AT3G21055 // AT3G61870 // AT3G18035 // AT2G28720 // AT1G54780 // AT1G14345 // AT1G48620 // AT1G21310 // AT2G32480 // AT1G75460 // AT1G67740 // AT5G11770 // AT1G32060 // AT5G56280 // AT5G45390 // AT5G52780 // AT1G03600 // AT5G13120 // AT2G05710 // AT1G26630 // AT5G13510 // AT4G33…	Exist
GO:0034622	P	cellular macromolecular complex assembly	32	454	592	28397	6.3e-09	2.6e-07	// AT4G02770 // AT5G36120 // AT4G32260 // AT1G75690 // AT5G58330 // AT1G72020 // AT2G37470 // AT3G21055 // AT3G61870 // AT3G18035 // AT2G28720 // AT1G54780 // AT1G14345 // AT1G48620 // AT1G21310 // AT2G32480 // AT1G75460 // AT1G67740 // AT5G11770 // AT1G32060 // AT5G56280 // AT5G45390 // AT5G52780 // AT1G03600 // AT5G13120 // AT2G05710 // AT4G33480 // AT5G13510 // AT3G10670 // AT3G16140 // AT1G19…	Exist
GO:0000096	P	sulfur amino acid metabolic process	28	454	465	28397	6.5e-09	2.7e-07	// AT4G02770 // AT3G12780 // AT2G22230 // AT4G23600 // AT1G31330 // AT2G05920 // AT3G51820 // AT1G20340 // AT2G31670 // AT5G18660 // AT3G26060 // AT1G15810 // AT1G58080 // AT3G13110 // AT1G66430 // AT1G54780 // AT1G55670 // AT1G67740 // AT1G32060 // AT1G14810 // AT4G23670 // AT1G63970 // AT2G43100 // AT5G13120 // AT1G76100 // AT1G17290 // AT3G10670 // AT5G08280	NA
GO:0009965	P	leaf morphogenesis	24	454	347	28397	6.7e-09	2.7e-07	// AT1G33240 // AT1G53230 // AT5G36120 // AT3G51820 // AT2G23760 // AT1G67840 // AT1G30210 // AT4G36870 // AT4G32551 // AT3G20680 // AT1G54500 // AT5G08410 // AT5G65930 // AT2G02070 // AT3G44880 // AT1G69690 // AT5G54630 // AT1G63970 // AT5G18660 // AT4G23600 // AT1G20340 // AT5G13510 // AT5G42070 // AT5G08280	NA
GO:0016311	P	dephosphorylation	20	454	245	28397	9.6e-09	3.8e-07	// AT1G75690 // AT4G02770 // AT1G53230 // AT1G67740 // AT3G21055 // AT1G75460 // AT4G32260 // AT1G03130 // AT1G76100 // AT3G44620 // AT1G32060 // AT5G13510 // AT3G10670 // AT1G54780 // AT5G45390 // AT1G69690 // AT1G30210 // AT1G03600 // AT4G14220 // AT1G73840	NA
GO:0008299	P	isoprenoid biosynthetic process	28	454	477	28397	1.1e-08	4.3e-07	// AT1G10960 // AT3G12780 // AT2G41680 // AT3G51820 // AT5G18660 // AT1G68590 // AT3G52150 // AT4G24620 // AT1G32990 // AT3G61870 // AT5G43750 // AT5G50250 // AT1G54780 // AT1G14345 // AT1G10830 // AT1G01080 // AT5G02130 // AT5G45390 // AT3G23700 // AT1G63970 // AT1G44920 // AT2G47590 // AT4G23600 // AT3G17210 // AT3G52380 // AT3G15520 // AT3G26060 // AT5G08280	NA
GO:0008610	P	lipid biosynthetic process	47	454	1159	28397	1.2e-08	4.8e-07	// AT1G10960 // AT3G12780 // AT2G22230 // AT2G41680 // AT3G56040 // AT3G51820 // AT5G10430 // AT2G14890 // AT1G68590 // AT3G52150 // AT1G67730 // AT1G32990 // AT5G42750 // AT4G24620 // AT3G61870 // AT4G05160 // AT5G50250 // AT3G17210 // AT3G25770 // AT1G54780 // AT1G14345 // AT1G10830 // AT3G10720 // AT1G01080 // AT5G02130 // AT5G18660 // AT5G43750 // AT5G45390 // AT5G12860 // AT3G23700 // AT1G63…	Exist
GO:0006396	P	RNA processing	42	454	967	28397	1.2e-08	4.8e-07	// AT4G02770 // AT3G53460 // AT2G39140 // AT2G43970 // AT4G32260 // AT1G75690 // AT2G05920 // AT1G17440 // AT3G51820 // AT5G58330 // AT2G31670 // AT5G18660 // AT3G26060 // AT1G15810 // AT4G35800 // AT1G32990 // AT4G32551 // AT3G18680 // AT5G25060 // AT3G21055 // AT3G61870 // AT2G29210 // AT1G54780 // AT4G09040 // AT4G09730 // AT1G73840 // AT1G67740 // AT1G32060 // AT5G45390 // AT3G23700 // AT1G63…	NA
GO:0009617	P	response to bacterium	31	454	577	28397	1.3e-08	4.8e-07	// AT1G53230 // AT3G12780 // AT4G32260 // AT3G54640 // AT3G23400 // AT1G30210 // AT2G37220 // AT5G50250 // AT5G14740 // AT2G47730 // AT4G23670 // AT4G14220 // AT1G75460 // AT3G52960 // AT3G44880 // AT1G32060 // AT3G01500 // AT1G53240 // AT1G69690 // AT3G27850 // AT3G23700 // AT5G06290 // AT1G55110 // AT2G33800 // AT1G26630 // AT3G29320 // AT3G17210 // AT2G25110 // AT2G03440 // AT5G08280 // AT1G24…	Exist
GO:0006778	P	porphyrin metabolic process	19	454	226	28397	1.4e-08	5.5e-07	// AT5G11840 // AT1G32990 // AT4G13830 // AT5G05200 // AT3G61870 // AT3G51820 // AT3G44880 // AT3G14067 // AT5G18660 // AT1G68830 // AT3G26060 // AT1G76450 // AT1G54780 // AT3G27925 // AT3G23700 // AT1G63970 // AT2G41680 // AT5G08280 // AT3G17210	Exist
GO:0033013	P	tetrapyrrole metabolic process	19	454	227	28397	1.5e-08	5.9e-07	// AT5G11840 // AT1G32990 // AT4G13830 // AT5G05200 // AT3G61870 // AT3G51820 // AT3G44880 // AT3G14067 // AT5G18660 // AT1G68830 // AT3G26060 // AT1G76450 // AT1G54780 // AT3G27925 // AT3G23700 // AT1G63970 // AT2G41680 // AT5G08280 // AT3G17210	Exist
GO:0022621	P	shoot system development	35	454	723	28397	1.7e-08	6.5e-07	// AT1G33240 // AT1G53230 // AT5G36120 // AT5G55730 // AT3G51820 // AT3G04760 // AT5G18660 // AT5G42070 // AT1G68590 // AT1G30210 // AT4G36870 // AT4G32551 // AT3G20680 // AT1G54500 // AT5G08410 // AT5G65930 // AT2G02070 // AT3G24770 // AT1G01080 // AT4G24930 // AT3G44880 // AT1G32060 // AT1G69690 // AT5G54630 // AT1G63970 // AT2G36120 // AT2G23760 // AT4G23600 // AT1G20340 // AT5G13510 // AT1G67…	NA
GO:0048367	P	shoot development	35	454	723	28397	1.7e-08	6.5e-07	// AT1G33240 // AT1G53230 // AT5G36120 // AT5G55730 // AT3G51820 // AT3G04760 // AT5G18660 // AT5G42070 // AT1G68590 // AT1G30210 // AT4G36870 // AT4G32551 // AT3G20680 // AT1G54500 // AT5G08410 // AT5G65930 // AT2G02070 // AT3G24770 // AT1G01080 // AT4G24930 // AT3G44880 // AT1G32060 // AT1G69690 // AT5G54630 // AT1G63970 // AT2G36120 // AT2G23760 // AT4G23600 // AT1G20340 // AT5G13510 // AT1G67…	NA
GO:0010557	P	positive regulation of macromolecule biosynthetic process	28	454	491	28397	2e-08	7.3e-07	// AT1G53230 // AT3G10525 // AT5G36120 // AT3G51820 // AT1G20340 // AT5G18660 // AT5G42070 // AT1G30210 // AT3G18680 // AT5G57180 // AT4G19110 // AT3G20680 // AT1G54500 // AT5G08410 // AT2G02070 // AT3G44880 // AT1G69690 // AT5G54630 // AT5G45390 // AT3G58120 // AT1G63970 // AT4G23600 // AT5G28300 // AT1G26630 // AT5G13510 // AT1G67840 // AT3G10670 // AT5G08280	NA
GO:0065003	P	macromolecular complex assembly	33	454	665	28397	2.6e-08	9.5e-07	// AT4G02770 // AT5G36120 // AT4G32260 // AT1G75690 // AT1G17440 // AT5G58330 // AT1G72020 // AT2G37470 // AT3G21055 // AT3G61870 // AT3G18035 // AT2G28720 // AT1G54780 // AT1G14345 // AT1G48620 // AT1G21310 // AT2G32480 // AT1G75460 // AT1G67740 // AT5G11770 // AT1G32060 // AT5G56280 // AT5G45390 // AT5G52780 // AT1G03600 // AT5G13120 // AT2G05710 // AT4G33480 // AT5G13510 // AT3G10670 // AT3G16…	Exist
GO:0048731	P	system development	68	454	2083	28397	2.9e-08	1e-06	// AT1G33240 // AT1G21880 // AT3G54660 // AT1G53230 // AT5G36120 // AT2G22230 // AT4G23600 // AT2G40070 // AT2G05920 // AT3G51820 // AT3G04760 // AT2G14890 // AT5G42070 // AT1G68590 // AT2G45470 // AT1G30210 // AT3G54920 // AT4G36870 // AT4G32551 // AT3G18680 // AT1G47200 // AT3G12780 // AT3G20680 // AT1G54500 // AT1G58080 // AT5G08410 // AT2G42880 // AT5G55730 // AT5G28500 // AT1G31130 // AT5G65…	NA
GO:0048513	P	organ development	68	454	2083	28397	2.9e-08	1e-06	// AT1G33240 // AT1G21880 // AT3G54660 // AT1G53230 // AT5G36120 // AT2G22230 // AT4G23600 // AT2G40070 // AT2G05920 // AT3G51820 // AT3G04760 // AT2G14890 // AT5G42070 // AT1G68590 // AT2G45470 // AT1G30210 // AT3G54920 // AT4G36870 // AT4G32551 // AT3G18680 // AT1G47200 // AT3G12780 // AT3G20680 // AT1G54500 // AT1G58080 // AT5G08410 // AT2G42880 // AT5G55730 // AT5G28500 // AT1G31130 // AT5G65…	NA
GO:0006720	P	isoprenoid metabolic process	28	454	500	28397	2.8e-08	1e-06	// AT1G10960 // AT3G12780 // AT2G41680 // AT3G51820 // AT5G18660 // AT1G68590 // AT3G52150 // AT4G24620 // AT1G32990 // AT3G61870 // AT5G43750 // AT5G50250 // AT1G54780 // AT1G14345 // AT1G10830 // AT1G01080 // AT5G02130 // AT5G45390 // AT3G23700 // AT1G63970 // AT1G44920 // AT2G47590 // AT4G23600 // AT3G17210 // AT3G52380 // AT3G15520 // AT3G26060 // AT5G08280	Exist
GO:0009891	P	positive regulation of biosynthetic process	31	454	600	28397	2.9e-08	1e-06	// AT1G53230 // AT3G10525 // AT5G36120 // AT3G51820 // AT1G20340 // AT5G18660 // AT5G42070 // AT1G30210 // AT3G18680 // AT5G57180 // AT4G19110 // AT3G20680 // AT1G54500 // AT5G08410 // AT1G61740 // AT4G38550 // AT2G02070 // AT3G44880 // AT1G69690 // AT5G54630 // AT5G45390 // AT3G58120 // AT1G63970 // AT1G51680 // AT4G23600 // AT5G28300 // AT1G26630 // AT5G13510 // AT1G67840 // AT3G10670 // AT5G08…	NA
GO:0031328	P	positive regulation of cellular biosynthetic process	31	454	600	28397	2.9e-08	1e-06	// AT1G53230 // AT3G10525 // AT5G36120 // AT3G51820 // AT1G20340 // AT5G18660 // AT5G42070 // AT1G30210 // AT3G18680 // AT5G57180 // AT4G19110 // AT3G20680 // AT1G54500 // AT5G08410 // AT1G61740 // AT4G38550 // AT2G02070 // AT3G44880 // AT1G69690 // AT5G54630 // AT5G45390 // AT3G58120 // AT1G63970 // AT1G51680 // AT4G23600 // AT5G28300 // AT1G26630 // AT5G13510 // AT1G67840 // AT3G10670 // AT5G08…	NA
GO:0046686	P	response to cadmium ion	27	454	470	28397	3.1e-08	1.1e-06	// AT3G12780 // AT2G41680 // AT1G20340 // AT5G62350 // AT5G49910 // AT4G32530 // AT3G11830 // AT5G27470 // AT2G46505 // AT3G13110 // AT2G43090 // AT3G22110 // AT4G23670 // AT1G13060 // AT3G46970 // AT3G19170 // AT1G53240 // AT2G33800 // AT1G29880 // AT4G25100 // AT3G22960 // AT2G05710 // AT1G17290 // AT1G26630 // AT3G17210 // AT2G23350 // AT5G09590	Exist
GO:0043623	P	cellular protein complex assembly	28	454	504	28397	3.3e-08	1.1e-06	// AT4G02770 // AT5G36120 // AT4G32260 // AT1G75690 // AT5G58330 // AT1G72020 // AT3G21055 // AT3G61870 // AT1G54780 // AT1G14345 // AT1G21310 // AT2G32480 // AT1G75460 // AT1G67740 // AT5G11770 // AT1G32060 // AT5G56280 // AT5G45390 // AT5G52780 // AT1G03600 // AT5G13120 // AT2G05710 // AT4G33480 // AT5G13510 // AT3G10670 // AT3G16140 // AT1G19740 // AT1G05140	Exist
GO:0006644	P	phospholipid metabolic process	27	454	472	28397	3.3e-08	1.1e-06	// AT3G12780 // AT2G41680 // AT3G51820 // AT5G18660 // AT1G68590 // AT3G52150 // AT4G24620 // AT1G32990 // AT3G61870 // AT5G43750 // AT5G50250 // AT1G54780 // AT1G14345 // AT1G01080 // AT5G45390 // AT3G23700 // AT1G63970 // AT4G36390 // AT1G44920 // AT2G47590 // AT1G01610 // AT3G25660 // AT4G23600 // AT3G17210 // AT3G52380 // AT3G15520 // AT5G08280	NA
GO:0043648	P	dicarboxylic acid metabolic process	15	454	143	28397	3.4e-08	1.2e-06	// AT3G18680 // AT1G15710 // AT4G36390 // AT5G66120 // AT3G47520 // AT3G54640 // AT1G14810 // AT5G58330 // AT5G18660 // AT1G53240 // AT3G10670 // AT3G51820 // AT5G11880 // AT1G63970 // AT5G08280	Exist
GO:0010604	P	positive regulation of macromolecule metabolic process	28	454	508	28397	3.9e-08	1.3e-06	// AT1G53230 // AT3G10525 // AT5G36120 // AT3G51820 // AT1G20340 // AT5G18660 // AT5G42070 // AT1G30210 // AT3G18680 // AT5G57180 // AT4G19110 // AT3G20680 // AT1G54500 // AT5G08410 // AT2G02070 // AT3G44880 // AT1G69690 // AT5G54630 // AT5G45390 // AT3G58120 // AT1G63970 // AT4G23600 // AT5G28300 // AT1G26630 // AT5G13510 // AT1G67840 // AT3G10670 // AT5G08280	NA
GO:0051188	P	cofactor biosynthetic process	24	454	388	28397	5e-08	1.7e-06	// AT1G53230 // AT2G22230 // AT2G41680 // AT3G51820 // AT5G18660 // AT3G26060 // AT1G30210 // AT1G32990 // AT3G18680 // AT3G61870 // AT5G66120 // AT5G08410 // AT1G54780 // AT3G44880 // AT3G52380 // AT3G23700 // AT1G63970 // AT4G36390 // AT4G23600 // AT1G76450 // AT3G17210 // AT3G10670 // AT2G30200 // AT5G08280	Exist
GO:0031325	P	positive regulation of cellular metabolic process	31	454	615	28397	5e-08	1.7e-06	// AT1G53230 // AT3G10525 // AT5G36120 // AT3G51820 // AT1G20340 // AT5G18660 // AT5G42070 // AT1G30210 // AT3G18680 // AT5G57180 // AT4G19110 // AT3G20680 // AT1G54500 // AT5G08410 // AT1G61740 // AT4G38550 // AT2G02070 // AT3G44880 // AT1G69690 // AT5G54630 // AT5G45390 // AT3G58120 // AT1G63970 // AT1G51680 // AT4G23600 // AT5G28300 // AT1G26630 // AT5G13510 // AT1G67840 // AT3G10670 // AT5G08…	NA
GO:0019637	P	organophosphate metabolic process	27	454	483	28397	5.2e-08	1.7e-06	// AT3G12780 // AT2G41680 // AT3G51820 // AT5G18660 // AT1G68590 // AT3G52150 // AT4G24620 // AT1G32990 // AT3G61870 // AT5G43750 // AT5G50250 // AT1G54780 // AT1G14345 // AT1G01080 // AT5G45390 // AT3G23700 // AT1G63970 // AT4G36390 // AT1G44920 // AT2G47590 // AT1G01610 // AT3G25660 // AT4G23600 // AT3G17210 // AT3G52380 // AT3G15520 // AT5G08280	Exist
GO:0009082	P	branched chain family amino acid biosynthetic process	7	454	17	28397	6.3e-08	2.1e-06	// AT3G58990 // AT2G43100 // AT1G18500 // AT3G48560 // AT1G14810 // AT2G43090 // AT3G23940	NA
GO:0009628	P	response to abiotic stimulus	79	454	2635	28397	6.3e-08	2.1e-06	// AT1G33240 // AT5G11060 // AT3G53460 // AT3G12780 // AT1G54990 // AT2G22230 // AT4G23600 // AT2G40070 // AT3G47520 // AT3G54640 // AT1G04300 // AT5G62350 // AT4G39960 // AT1G67840 // AT5G49910 // AT4G32530 // AT5G45550 // AT1G26630 // AT4G25130 // AT2G37220 // AT3G25770 // AT3G11830 // AT4G36220 // AT3G54920 // AT5G27470 // AT2G18960 // AT1G06000 // AT5G42050 // AT5G50250 // AT4G32260 // AT5G14…	Exist
GO:0009893	P	positive regulation of metabolic process	31	454	623	28397	6.5e-08	2.1e-06	// AT1G53230 // AT3G10525 // AT5G36120 // AT3G51820 // AT1G20340 // AT5G18660 // AT5G42070 // AT1G30210 // AT3G18680 // AT5G57180 // AT4G19110 // AT3G20680 // AT1G54500 // AT5G08410 // AT1G61740 // AT4G38550 // AT2G02070 // AT3G44880 // AT1G69690 // AT5G54630 // AT5G45390 // AT3G58120 // AT1G63970 // AT1G51680 // AT4G23600 // AT5G28300 // AT1G26630 // AT5G13510 // AT1G67840 // AT3G10670 // AT5G08…	NA
GO:0042742	P	defense response to bacterium	24	454	394	28397	6.5e-08	2.1e-06	// AT3G12780 // AT4G32260 // AT3G54640 // AT3G23400 // AT2G37220 // AT5G50250 // AT5G14740 // AT2G47730 // AT4G23670 // AT3G52960 // AT3G44880 // AT1G32060 // AT3G01500 // AT1G53240 // AT2G25110 // AT3G27850 // AT3G23700 // AT5G06290 // AT2G33800 // AT1G26630 // AT3G29320 // AT3G17210 // AT5G08280 // AT1G24100	Exist
GO:0018198	P	peptidyl-cysteine modification	7	454	18	28397	8.6e-08	2.7e-06	// AT3G12780 // AT3G52960 // AT1G32060 // AT1G53240 // AT4G20360 // AT5G35100 // AT5G08280	NA
GO:0019220	P	regulation of phosphate metabolic process	18	454	231	28397	1e-07	3.2e-06	// AT1G75690 // AT4G02770 // AT1G53230 // AT1G67740 // AT3G21055 // AT1G75460 // AT4G32260 // AT1G03130 // AT1G76100 // AT1G32060 // AT5G13510 // AT3G10670 // AT1G54780 // AT5G45390 // AT1G69690 // AT1G30210 // AT4G14220 // AT1G03600	NA
GO:0051174	P	regulation of phosphorus metabolic process	18	454	231	28397	1e-07	3.2e-06	// AT1G75690 // AT4G02770 // AT1G53230 // AT1G67740 // AT3G21055 // AT1G75460 // AT4G32260 // AT1G03130 // AT1G76100 // AT1G32060 // AT5G13510 // AT3G10670 // AT1G54780 // AT5G45390 // AT1G69690 // AT1G30210 // AT4G14220 // AT1G03600	NA
GO:0006461	P	protein complex assembly	29	454	577	28397	1.4e-07	4.4e-06	// AT4G02770 // AT5G36120 // AT4G32260 // AT1G75690 // AT1G17440 // AT5G58330 // AT1G72020 // AT3G21055 // AT3G61870 // AT1G54780 // AT1G14345 // AT1G21310 // AT2G32480 // AT1G75460 // AT1G67740 // AT5G11770 // AT1G32060 // AT5G56280 // AT5G45390 // AT5G52780 // AT1G03600 // AT5G13120 // AT2G05710 // AT4G33480 // AT5G13510 // AT3G10670 // AT3G16140 // AT1G19740 // AT1G05140	Exist
GO:0070271	P	protein complex biogenesis	29	454	577	28397	1.4e-07	4.4e-06	// AT4G02770 // AT5G36120 // AT4G32260 // AT1G75690 // AT1G17440 // AT5G58330 // AT1G72020 // AT3G21055 // AT3G61870 // AT1G54780 // AT1G14345 // AT1G21310 // AT2G32480 // AT1G75460 // AT1G67740 // AT5G11770 // AT1G32060 // AT5G56280 // AT5G45390 // AT5G52780 // AT1G03600 // AT5G13120 // AT2G05710 // AT4G33480 // AT5G13510 // AT3G10670 // AT3G16140 // AT1G19740 // AT1G05140	Exist
GO:0061024	P	membrane organization	28	454	543	28397	1.4e-07	4.4e-06	// AT3G22120 // AT1G53230 // AT5G36120 // AT2G41680 // AT3G51820 // AT1G30210 // AT1G32990 // AT3G18680 // AT1G20110 // AT3G12780 // AT3G61870 // AT4G34150 // AT5G43750 // AT5G50250 // AT4G32760 // AT4G20830 // AT3G44880 // AT5G45390 // AT3G23700 // AT1G63970 // AT5G06290 // AT1G77490 // AT1G44920 // AT1G76450 // AT5G13510 // AT3G10670 // AT3G52380 // AT5G52440	Exist
GO:0016044	P	cellular membrane organization	28	454	543	28397	1.4e-07	4.4e-06	// AT3G22120 // AT1G53230 // AT5G36120 // AT2G41680 // AT3G51820 // AT1G30210 // AT1G32990 // AT3G18680 // AT1G20110 // AT3G12780 // AT3G61870 // AT4G34150 // AT5G43750 // AT5G50250 // AT4G32760 // AT4G20830 // AT3G44880 // AT5G45390 // AT3G23700 // AT1G63970 // AT5G06290 // AT1G77490 // AT1G44920 // AT1G76450 // AT5G13510 // AT3G10670 // AT3G52380 // AT5G52440	NA
GO:0048522	P	positive regulation of cellular process	35	454	793	28397	1.5e-07	4.6e-06	// AT1G53230 // AT3G10525 // AT5G36120 // AT3G51820 // AT1G20340 // AT5G18660 // AT5G42070 // AT1G30210 // AT3G18680 // AT5G25060 // AT5G57180 // AT4G19110 // AT3G20680 // AT1G54500 // AT3G07100 // AT5G08410 // AT1G61740 // AT4G38550 // AT3G06400 // AT2G02070 // AT4G39680 // AT3G44880 // AT1G69690 // AT5G54630 // AT5G45390 // AT3G58120 // AT1G63970 // AT1G51680 // AT4G23600 // AT5G28300 // AT1G26…	NA
GO:0045935	P	positive regulation of nucleobase, nucleoside, nucleotide and nucleic acid metabolic process	26	454	479	28397	1.6e-07	4.8e-06	// AT1G53230 // AT3G10525 // AT5G36120 // AT3G51820 // AT1G20340 // AT5G18660 // AT5G42070 // AT1G30210 // AT3G18680 // AT5G57180 // AT3G20680 // AT1G54500 // AT5G08410 // AT2G02070 // AT3G44880 // AT1G69690 // AT5G54630 // AT5G45390 // AT3G58120 // AT1G63970 // AT4G23600 // AT5G28300 // AT5G13510 // AT1G67840 // AT3G10670 // AT5G08280	NA
GO:0051173	P	positive regulation of nitrogen compound metabolic process	26	454	480	28397	1.6e-07	5e-06	// AT1G53230 // AT3G10525 // AT5G36120 // AT3G51820 // AT1G20340 // AT5G18660 // AT5G42070 // AT1G30210 // AT3G18680 // AT5G57180 // AT3G20680 // AT1G54500 // AT5G08410 // AT2G02070 // AT3G44880 // AT1G69690 // AT5G54630 // AT5G45390 // AT3G58120 // AT1G63970 // AT4G23600 // AT5G28300 // AT5G13510 // AT1G67840 // AT3G10670 // AT5G08280	NA
GO:0048366	P	leaf development	25	454	451	28397	1.9e-07	5.7e-06	// AT1G33240 // AT1G53230 // AT5G36120 // AT3G51820 // AT2G23760 // AT1G67840 // AT1G30210 // AT4G36870 // AT4G32551 // AT3G20680 // AT1G54500 // AT5G08410 // AT5G65930 // AT2G02070 // AT3G44880 // AT1G69690 // AT5G54630 // AT1G63970 // AT2G36120 // AT5G18660 // AT4G23600 // AT1G20340 // AT5G13510 // AT5G42070 // AT5G08280	NA
GO:0048518	P	positive regulation of biological process	37	454	896	28397	3.1e-07	9.3e-06	// AT1G53230 // AT3G10525 // AT5G36120 // AT3G51820 // AT1G20340 // AT5G18660 // AT5G42070 // AT1G30210 // AT4G24620 // AT3G18680 // AT5G25060 // AT5G57180 // AT4G19110 // AT3G20680 // AT1G54500 // AT3G07100 // AT5G08410 // AT1G61740 // AT4G38550 // AT3G06400 // AT2G02070 // AT4G39680 // AT3G44880 // AT2G25110 // AT5G54630 // AT5G45390 // AT3G58120 // AT1G63970 // AT1G51680 // AT4G23600 // AT5G28…	NA
GO:0070727	P	cellular macromolecule localization	42	454	1093	28397	3.1e-07	9.3e-06	// AT3G22120 // AT3G54660 // AT4G32260 // AT1G72750 // AT3G54640 // AT1G53230 // AT2G20760 // AT5G49910 // AT3G52150 // AT1G30210 // AT5G19590 // AT5G42050 // AT3G18680 // AT1G20110 // AT5G57180 // AT4G34150 // AT3G07100 // AT5G14740 // AT1G61740 // AT4G38550 // AT4G20830 // AT4G14220 // AT1G75460 // AT2G40060 // AT2G25970 // AT1G06950 // AT2G24820 // AT3G01500 // AT1G69690 // AT2G33800 // AT5G41…	Exist
GO:0045893	P	positive regulation of transcription, DNA-dependent	25	454	467	28397	3.5e-07	1e-05	// AT1G53230 // AT5G36120 // AT3G51820 // AT1G20340 // AT5G18660 // AT1G67840 // AT1G30210 // AT3G18680 // AT5G57180 // AT3G20680 // AT1G54500 // AT5G08410 // AT2G02070 // AT3G44880 // AT1G69690 // AT5G54630 // AT5G45390 // AT3G58120 // AT1G63970 // AT4G23600 // AT5G28300 // AT5G13510 // AT5G42070 // AT3G10670 // AT5G08280	NA
GO:0045941	P	positive regulation of transcription	25	454	467	28397	3.5e-07	1e-05	// AT1G53230 // AT5G36120 // AT3G51820 // AT1G20340 // AT5G18660 // AT1G67840 // AT1G30210 // AT3G18680 // AT5G57180 // AT3G20680 // AT1G54500 // AT5G08410 // AT2G02070 // AT3G44880 // AT1G69690 // AT5G54630 // AT5G45390 // AT3G58120 // AT1G63970 // AT4G23600 // AT5G28300 // AT5G13510 // AT5G42070 // AT3G10670 // AT5G08280	NA
GO:0065007	P	biological regulation	146	454	6222	28397	3.7e-07	1.1e-05	// AT1G33240 // AT3G54660 // AT5G05200 // AT5G36120 // AT2G22230 // AT1G75690 // AT2G41680 // AT3G51820 // AT1G67840 // AT1G76880 // AT1G30210 // AT4G24620 // AT4G36870 // AT3G18680 // AT5G42750 // AT3G12780 // AT3G14240 // AT1G54780 // AT3G20810 // AT2G02070 // AT2G28840 // AT3G14067 // AT3G44880 // AT1G69690 // AT5G64620 // AT1G77490 // AT2G15290 // AT5G38560 // AT1G20340 // AT1G19350 // AT3G56…	NA
GO:0051254	P	positive regulation of RNA metabolic process	25	454	471	28397	4.1e-07	1.2e-05	// AT1G53230 // AT5G36120 // AT3G51820 // AT1G20340 // AT5G18660 // AT1G67840 // AT1G30210 // AT3G18680 // AT5G57180 // AT3G20680 // AT1G54500 // AT5G08410 // AT2G02070 // AT3G44880 // AT1G69690 // AT5G54630 // AT5G45390 // AT3G58120 // AT1G63970 // AT4G23600 // AT5G28300 // AT5G13510 // AT5G42070 // AT3G10670 // AT5G08280	NA
GO:0050896	P	response to stimulus	147	454	6292	28397	4.3e-07	1.2e-05	// AT3G11660 // AT1G33240 // AT3G12780 // AT2G22230 // AT2G41680 // AT2G23130 // AT1G04300 // AT4G39960 // AT1G67840 // AT4G32530 // AT1G30210 // AT5G42050 // AT5G50250 // AT2G47730 // AT2G43090 // AT1G54780 // AT5G06290 // AT1G13060 // AT3G06550 // AT1G49750 // AT3G47520 // AT3G44880 // AT3G22110 // AT5G50915 // AT1G69690 // AT1G77490 // AT2G47590 // AT5G14920 // AT2G05710 // AT1G20340 // AT1G19…	Exist
GO:0010628	P	positive regulation of gene expression	25	454	473	28397	4.4e-07	1.2e-05	// AT1G53230 // AT5G36120 // AT3G51820 // AT1G20340 // AT5G18660 // AT1G67840 // AT1G30210 // AT3G18680 // AT5G57180 // AT3G20680 // AT1G54500 // AT5G08410 // AT2G02070 // AT3G44880 // AT1G69690 // AT5G54630 // AT5G45390 // AT3G58120 // AT1G63970 // AT4G23600 // AT5G28300 // AT5G13510 // AT5G42070 // AT3G10670 // AT5G08280	NA
GO:0006800	P	oxygen and reactive oxygen species metabolic process	21	454	347	28397	4.8e-07	1.4e-05	// AT4G14220 // AT2G41680 // AT1G53230 // AT3G19170 // AT4G25100 // AT1G75460 // AT4G32260 // AT3G12780 // AT1G20340 // AT5G25060 // AT3G54640 // AT1G32060 // AT3G01500 // AT5G14740 // AT1G69690 // AT1G54410 // AT4G35800 // AT1G30210 // AT1G60870 // AT3G49220 // AT5G06290	NA
GO:0006886	P	intracellular protein transport	40	454	1044	28397	6.5e-07	1.8e-05	// AT3G54660 // AT4G32260 // AT1G72750 // AT3G54640 // AT1G53230 // AT2G20760 // AT5G49910 // AT3G52150 // AT1G30210 // AT5G19590 // AT5G42050 // AT3G18680 // AT1G20110 // AT5G57180 // AT4G34150 // AT3G07100 // AT5G14740 // AT1G61740 // AT4G38550 // AT4G20830 // AT4G14220 // AT1G75460 // AT2G40060 // AT2G25970 // AT1G06950 // AT2G24820 // AT3G01500 // AT1G69690 // AT2G33800 // AT5G41685 // AT1G32…	Exist
GO:0009658	P	chloroplast organization	17	454	237	28397	6.8e-07	1.9e-05	// AT4G09730 // AT3G18680 // AT3G54660 // AT3G19170 // AT3G12780 // AT1G06950 // AT1G76450 // AT1G32060 // AT3G23400 // AT5G13510 // AT5G46290 // AT3G10670 // AT3G51820 // AT5G45390 // AT3G23700 // AT2G32480 // AT3G07430	Exist
GO:0009607	P	response to biotic stimulus	55	454	1687	28397	7.4e-07	2e-05	// AT3G11660 // AT4G14220 // AT1G53230 // AT3G12780 // AT2G22230 // AT5G64290 // AT3G54640 // AT3G23400 // AT1G30210 // AT3G54920 // AT2G37220 // AT4G32551 // AT3G21690 // AT4G34150 // AT5G42050 // AT5G50250 // AT4G32260 // AT5G14740 // AT1G31130 // AT4G38550 // AT1G21310 // AT1G72020 // AT4G20830 // AT2G47710 // AT2G47730 // AT1G16410 // AT3G06550 // AT1G75460 // AT3G52960 // AT5G11770 // AT3G44…	NA
GO:0017014	P	protein amino acid nitrosylation	6	454	16	28397	8.9e-07	2.4e-05	// AT3G12780 // AT3G52960 // AT1G32060 // AT1G53240 // AT4G20360 // AT5G35100	Exist
GO:0018119	P	peptidyl-cysteine S-nitrosylation	6	454	16	28397	8.9e-07	2.4e-05	// AT3G12780 // AT3G52960 // AT1G32060 // AT1G53240 // AT4G20360 // AT5G35100	Exist
GO:0034613	P	cellular protein localization	40	454	1059	28397	9.2e-07	2.5e-05	// AT3G54660 // AT4G32260 // AT1G72750 // AT3G54640 // AT1G53230 // AT2G20760 // AT5G49910 // AT3G52150 // AT1G30210 // AT5G19590 // AT5G42050 // AT3G18680 // AT1G20110 // AT5G57180 // AT4G34150 // AT3G07100 // AT5G14740 // AT1G61740 // AT4G38550 // AT4G20830 // AT4G14220 // AT1G75460 // AT2G40060 // AT2G25970 // AT1G06950 // AT2G24820 // AT3G01500 // AT1G69690 // AT2G33800 // AT5G41685 // AT1G32…	Exist
GO:0048827	P	phyllome development	25	454	497	28397	1e-06	2.8e-05	// AT1G33240 // AT1G53230 // AT5G36120 // AT3G51820 // AT2G23760 // AT1G67840 // AT1G30210 // AT4G36870 // AT4G32551 // AT3G20680 // AT1G54500 // AT5G08410 // AT5G65930 // AT2G02070 // AT3G44880 // AT1G69690 // AT5G54630 // AT1G63970 // AT2G36120 // AT5G18660 // AT4G23600 // AT1G20340 // AT5G13510 // AT5G42070 // AT5G08280	NA
GO:0042743	P	hydrogen peroxide metabolic process	20	454	335	28397	1.1e-06	2.9e-05	// AT4G14220 // AT1G53230 // AT3G19170 // AT3G12780 // AT1G75460 // AT4G32260 // AT2G41680 // AT1G20340 // AT5G25060 // AT3G54640 // AT1G32060 // AT3G01500 // AT5G14740 // AT1G69690 // AT1G54410 // AT4G35800 // AT1G30210 // AT1G60870 // AT3G49220 // AT5G06290	NA
GO:0022607	P	cellular component assembly	34	454	832	28397	1.2e-06	3.2e-05	// AT4G02770 // AT5G36120 // AT4G32260 // AT1G75690 // AT1G17440 // AT5G58330 // AT1G72020 // AT2G37470 // AT3G21055 // AT3G61870 // AT3G18035 // AT2G28720 // AT1G54780 // AT1G14345 // AT1G48620 // AT1G21310 // AT2G32480 // AT1G75460 // AT1G67740 // AT1G65060 // AT5G11770 // AT1G32060 // AT5G56280 // AT5G45390 // AT5G52780 // AT1G03600 // AT5G13120 // AT2G05710 // AT4G33480 // AT5G13510 // AT3G10…	Exist
GO:0010038	P	response to metal ion	28	454	610	28397	1.3e-06	3.5e-05	// AT3G12780 // AT2G41680 // AT1G20340 // AT5G62350 // AT5G49910 // AT4G32530 // AT3G11830 // AT5G27470 // AT2G46505 // AT3G13110 // AT2G43090 // AT5G42130 // AT3G22110 // AT4G23670 // AT1G13060 // AT3G46970 // AT3G19170 // AT1G53240 // AT2G33800 // AT1G29880 // AT4G25100 // AT3G22960 // AT2G05710 // AT1G17290 // AT1G26630 // AT3G17210 // AT2G23350 // AT5G09590	Exist
GO:0051234	P	establishment of localization	95	454	3652	28397	1.4e-06	3.8e-05	// AT3G54660 // AT3G12780 // AT1G72750 // AT3G51820 // AT1G67840 // AT4G32530 // AT1G30210 // AT5G42050 // AT3G18680 // AT1G71050 // AT5G57180 // AT2G43090 // AT1G61740 // AT5G06290 // AT2G28840 // AT1G69690 // AT4G23670 // AT2G15290 // AT2G05710 // AT1G20340 // AT3G17210 // AT3G10670 // AT3G19860 // AT5G14040 // AT5G52440 // AT1G53230 // AT4G32260 // AT1G62500 // AT5G64290 // AT3G52150 // AT5G19…	Exist
GO:0046148	P	pigment biosynthetic process	18	454	282	28397	1.5e-06	4.1e-05	// AT4G19170 // AT3G61870 // AT5G18660 // AT1G32990 // AT3G51820 // AT1G65060 // AT1G76450 // AT2G47590 // AT3G17210 // AT3G26060 // AT1G30530 // AT1G54780 // AT1G06000 // AT1G10830 // AT3G23700 // AT1G63970 // AT2G41680 // AT5G08280	Exist
GO:0015995	P	chlorophyll biosynthetic process	12	454	125	28397	1.9e-06	4.9e-05	// AT1G63970 // AT3G61870 // AT2G41680 // AT1G76450 // AT5G18660 // AT3G17210 // AT3G26060 // AT3G51820 // AT1G54780 // AT3G23700 // AT1G32990 // AT5G08280	Exist
GO:0009887	P	organ morphogenesis	28	454	629	28397	2.3e-06	6e-05	// AT1G33240 // AT1G21880 // AT1G53230 // AT5G36120 // AT3G51820 // AT2G23760 // AT1G67840 // AT1G30210 // AT4G36870 // AT4G32551 // AT5G25060 // AT3G20680 // AT1G54500 // AT5G08410 // AT5G65930 // AT2G02070 // AT4G39680 // AT5G54630 // AT1G69690 // AT3G44880 // AT1G63970 // AT5G18660 // AT4G23600 // AT1G20340 // AT3G56900 // AT5G13510 // AT5G42070 // AT5G08280	NA
GO:0009063	P	cellular amino acid catabolic process	14	454	178	28397	2.4e-06	6.2e-05	// AT3G52500 // AT1G15710 // AT4G23600 // AT1G17290 // AT1G58080 // AT5G19240 // AT5G52810 // AT3G13110 // AT3G54640 // AT3G10670 // AT2G26080 // AT5G01750 // AT4G25130 // AT1G24100	NA
GO:0048856	P	anatomical structure development	89	454	3396	28397	2.5e-06	6.4e-05	// AT1G33240 // AT3G54660 // AT5G36120 // AT2G22230 // AT3G51820 // AT3G04760 // AT1G67840 // AT1G30210 // AT4G24620 // AT4G36870 // AT3G18680 // AT4G14510 // AT4G20360 // AT2G02070 // AT3G07430 // AT3G44880 // AT2G01290 // AT1G69690 // AT5G38560 // AT1G20340 // AT3G56900 // AT5G46290 // AT3G10670 // AT5G28500 // AT5G54310 // AT5G08280 // AT1G24100 // AT1G53230 // AT2G05920 // AT1G60870 // AT2G14…	NA
GO:0009081	P	branched chain family amino acid metabolic process	7	454	33	28397	2.7e-06	6.9e-05	// AT3G58990 // AT2G43100 // AT1G18500 // AT3G48560 // AT1G14810 // AT2G43090 // AT3G23940	Exist
GO:0043170	P	macromolecule metabolic process	195	454	9246	28397	2.8e-06	7.2e-05	// AT1G33240 // AT5G05200 // AT5G36120 // AT2G22230 // AT1G75690 // AT2G41680 // AT3G62120 // AT3G51820 // AT4G39960 // AT1G67840 // AT1G76880 // AT1G30210 // AT4G24620 // AT4G36870 // AT3G18680 // AT5G57180 // AT3G14240 // AT1G62850 // AT5G50250 // AT2G47730 // AT2G43090 // AT1G54780 // AT5G62220 // AT4G09040 // AT4G25890 // AT2G02070 // AT5G35100 // AT1G13060 // AT1G73840 // AT3G44880 // AT2G01…	NA
GO:0051179	P	localization	97	454	3819	28397	3e-06	7.5e-05	// AT3G54660 // AT3G12780 // AT1G72750 // AT3G51820 // AT1G67840 // AT4G32530 // AT1G30210 // AT5G42050 // AT3G18680 // AT1G71050 // AT5G57180 // AT2G43090 // AT1G61740 // AT5G06290 // AT2G28840 // AT1G69690 // AT4G23670 // AT2G15290 // AT2G05710 // AT1G20340 // AT3G17210 // AT3G10670 // AT3G19860 // AT5G14040 // AT1G24100 // AT1G53230 // AT4G32260 // AT1G62500 // AT5G64290 // AT3G52150 // AT5G19…	Exist
GO:0022900	P	electron transport chain	12	454	133	28397	3.4e-06	8.5e-05	// AT1G76100 // AT1G54500 // AT1G32060 // AT5G11770 // AT1G54780 // AT3G52150 // AT3G15840 // AT1G55670 // AT3G23700 // AT4G04020 // AT1G10960 // AT5G42270	Exist
GO:0051707	P	response to other organism	47	454	1421	28397	3.5e-06	8.7e-05	// AT3G11660 // AT4G14220 // AT1G53230 // AT3G12780 // AT2G22230 // AT5G64290 // AT3G54640 // AT3G23400 // AT1G30210 // AT3G54920 // AT2G37220 // AT4G32551 // AT3G21690 // AT5G42050 // AT5G50250 // AT4G32260 // AT5G14740 // AT1G31130 // AT4G38550 // AT2G47730 // AT2G47710 // AT1G16410 // AT3G06550 // AT1G75460 // AT3G52960 // AT3G44880 // AT1G32060 // AT3G01500 // AT1G53240 // AT2G25110 // AT3G27…	NA
GO:0009773	P	photosynthetic electron transport in photosystem I	8	454	51	28397	3.9e-06	9.6e-05	// AT1G54500 // AT1G76100 // AT1G32060 // AT5G42270 // AT1G54780 // AT3G52150 // AT1G55670 // AT3G23700	NA
GO:0009310	P	amine catabolic process	15	454	214	28397	4e-06	9.8e-05	// AT3G52500 // AT1G15710 // AT1G51680 // AT4G23600 // AT1G17290 // AT1G58080 // AT5G19240 // AT5G52810 // AT3G13110 // AT3G54640 // AT3G10670 // AT2G26080 // AT5G01750 // AT4G25130 // AT1G24100	NA
GO:0045036	P	protein targeting to chloroplast	9	454	71	28397	4.7e-06	0.00012	// AT3G18680 // AT2G15290 // AT5G57180 // AT2G33800 // AT1G06950 // AT2G24820 // AT5G49910 // AT3G52150 // AT5G52440	Exist
GO:0019252	P	starch biosynthetic process	14	454	191	28397	5.1e-06	0.00013	// AT3G46970 // AT2G35960 // AT3G51510 // AT5G28500 // AT5G05200 // AT5G36120 // AT2G47590 // AT2G41680 // AT1G76450 // AT5G58330 // AT5G50250 // AT3G29320 // AT3G12780 // AT4G24620	NA
GO:0006950	P	response to stress	101	454	4089	28397	5.8e-06	0.00014	// AT3G11660 // AT1G33240 // AT3G12780 // AT2G22230 // AT2G41680 // AT3G47520 // AT4G39960 // AT4G32530 // AT1G30210 // AT5G42050 // AT5G50250 // AT2G47730 // AT2G43090 // AT1G61740 // AT5G06290 // AT3G06550 // AT1G49750 // AT3G44880 // AT3G22110 // AT1G69690 // AT1G77490 // AT2G47590 // AT5G14920 // AT2G05710 // AT1G20340 // AT3G17210 // AT3G49220 // AT5G08280 // AT1G24100 // AT4G14220 // AT1G53…	Exist
GO:0019538	P	protein metabolic process	122	454	5220	28397	6.6e-06	0.00016	// AT3G12780 // AT1G75690 // AT3G62120 // AT4G39960 // AT1G67840 // AT1G30210 // AT5G42050 // AT3G14240 // AT1G62850 // AT2G47730 // AT1G54780 // AT4G20360 // AT1G07110 // AT2G02070 // AT5G35100 // AT1G13060 // AT3G14067 // AT1G41880 // AT1G69690 // AT1G09750 // AT3G61820 // AT1G26150 // AT5G38560 // AT1G20340 // AT2G25760 // AT3G56900 // AT3G10670 // AT5G54310 // AT5G08280 // AT4G23800 // AT1G53…	Exist
GO:0006605	P	protein targeting	34	454	906	28397	7.1e-06	0.00017	// AT3G54660 // AT4G32260 // AT3G54640 // AT1G53230 // AT5G49910 // AT3G52150 // AT1G30210 // AT5G19590 // AT5G42050 // AT3G18680 // AT1G20110 // AT5G57180 // AT4G34150 // AT5G14740 // AT1G61740 // AT4G38550 // AT4G20830 // AT4G14220 // AT1G75460 // AT2G25970 // AT1G06950 // AT2G24820 // AT3G01500 // AT1G69690 // AT2G33800 // AT1G32060 // AT5G06290 // AT4G32760 // AT2G15290 // AT1G51680 // AT1G04…	Exist
GO:0045184	P	establishment of protein localization	40	454	1160	28397	7.6e-06	0.00018	// AT3G54660 // AT4G32260 // AT1G72750 // AT3G54640 // AT1G53230 // AT2G20760 // AT5G49910 // AT3G52150 // AT1G30210 // AT5G19590 // AT5G42050 // AT3G18680 // AT1G20110 // AT5G57180 // AT4G34150 // AT3G07100 // AT5G14740 // AT1G61740 // AT4G38550 // AT4G20830 // AT4G14220 // AT1G75460 // AT2G40060 // AT2G25970 // AT1G06950 // AT2G24820 // AT3G01500 // AT1G69690 // AT2G33800 // AT5G41685 // AT1G32…	Exist
GO:0015031	P	protein transport	40	454	1160	28397	7.6e-06	0.00018	// AT3G54660 // AT4G32260 // AT1G72750 // AT3G54640 // AT1G53230 // AT2G20760 // AT5G49910 // AT3G52150 // AT1G30210 // AT5G19590 // AT5G42050 // AT3G18680 // AT1G20110 // AT5G57180 // AT4G34150 // AT3G07100 // AT5G14740 // AT1G61740 // AT4G38550 // AT4G20830 // AT4G14220 // AT1G75460 // AT2G40060 // AT2G25970 // AT1G06950 // AT2G24820 // AT3G01500 // AT1G69690 // AT2G33800 // AT5G41685 // AT1G32…	Exist
GO:0018130	P	heterocycle biosynthetic process	16	454	258	28397	8.3e-06	0.00019	// AT5G08410 // AT1G63970 // AT3G61870 // AT2G41680 // AT1G58080 // AT1G76450 // AT3G54640 // AT5G18660 // AT3G17210 // AT3G26060 // AT3G51820 // AT1G54780 // AT3G23700 // AT1G32990 // AT3G57560 // AT5G08280	NA
GO:0005982	P	starch metabolic process	15	454	230	28397	9e-06	0.00021	// AT3G46970 // AT2G35960 // AT3G51510 // AT5G28500 // AT5G05200 // AT5G36120 // AT2G22230 // AT2G41680 // AT1G76450 // AT5G58330 // AT5G50250 // AT2G47590 // AT3G29320 // AT3G12780 // AT4G24620	Exist
GO:0019438	P	aromatic compound biosynthetic process	28	454	680	28397	9.3e-06	0.00022	// AT1G15710 // AT3G12780 // AT4G32260 // AT3G54640 // AT3G51820 // AT5G18660 // AT4G19170 // AT2G37220 // AT3G18680 // AT4G36220 // AT5G66120 // AT1G06000 // AT5G50250 // AT5G14740 // AT1G61740 // AT4G38550 // AT1G30530 // AT1G65060 // AT1G32060 // AT3G01500 // AT1G63970 // AT5G06290 // AT4G36390 // AT1G51680 // AT4G23600 // AT1G17290 // AT3G10670 // AT5G08280	NA
GO:0051641	P	cellular localization	50	454	1613	28397	9.4e-06	0.00022	// AT3G22120 // AT3G54660 // AT4G32260 // AT1G72750 // AT3G54640 // AT3G51820 // AT1G53230 // AT2G20760 // AT5G49910 // AT3G52150 // AT5G45550 // AT1G30210 // AT5G19590 // AT5G42050 // AT3G18680 // AT1G47200 // AT1G20110 // AT5G57180 // AT4G34150 // AT3G07100 // AT5G14740 // AT1G61740 // AT4G38550 // AT1G04790 // AT4G20830 // AT4G14220 // AT1G75460 // AT2G40060 // AT2G25970 // AT1G06950 // AT2G24…	Exist
GO:0009073	P	aromatic amino acid family biosynthetic process	10	454	100	28397	9.7e-06	0.00022	// AT3G18680 // AT1G15710 // AT4G36390 // AT5G66120 // AT3G54640 // AT3G51820 // AT5G18660 // AT3G10670 // AT1G63970 // AT5G08280	NA
GO:0008104	P	protein localization	41	454	1216	28397	9.8e-06	0.00023	// AT3G54660 // AT4G32260 // AT1G72750 // AT3G54640 // AT1G53230 // AT2G20760 // AT5G49910 // AT3G52150 // AT1G30210 // AT5G19590 // AT5G42050 // AT3G18680 // AT1G20110 // AT5G57180 // AT4G34150 // AT3G07100 // AT5G14740 // AT1G61740 // AT4G38550 // AT4G20830 // AT4G14220 // AT1G75460 // AT2G40060 // AT2G25970 // AT1G06950 // AT2G24820 // AT3G01500 // AT1G69690 // AT2G33800 // AT5G41685 // AT1G32…	Exist
GO:0046417	P	chorismate metabolic process	10	454	101	28397	1.1e-05	0.00024	// AT3G18680 // AT1G15710 // AT4G36390 // AT5G66120 // AT3G54640 // AT3G51820 // AT5G18660 // AT3G10670 // AT1G63970 // AT5G08280	NA
GO:0006810	P	transport	90	454	3577	28397	1.1e-05	0.00025	// AT3G54660 // AT3G12780 // AT1G72750 // AT1G67840 // AT4G32530 // AT1G30210 // AT5G42050 // AT3G18680 // AT1G71050 // AT5G57180 // AT2G43090 // AT1G61740 // AT5G06290 // AT2G28840 // AT1G69690 // AT4G23670 // AT2G15290 // AT2G05710 // AT1G20340 // AT3G17210 // AT3G10670 // AT3G19860 // AT5G14040 // AT5G52440 // AT1G53230 // AT4G32260 // AT1G62500 // AT5G64290 // AT3G52150 // AT5G19590 // AT1G20…	Exist
GO:0009767	P	photosynthetic electron transport chain	9	454	80	28397	1.1e-05	0.00026	// AT1G76100 // AT1G54500 // AT4G04020 // AT5G42270 // AT1G54780 // AT3G52150 // AT1G55670 // AT3G23700 // AT1G32060	NA
GO:0006629	P	lipid metabolic process	53	454	1772	28397	1.3e-05	0.00029	// AT1G10960 // AT3G12780 // AT2G22230 // AT2G41680 // AT3G56040 // AT3G51820 // AT5G10430 // AT2G14890 // AT5G43280 // AT1G68590 // AT3G52150 // AT1G67730 // AT1G32990 // AT5G19590 // AT5G42750 // AT4G24620 // AT3G61870 // AT4G05160 // AT5G50250 // AT3G17210 // AT3G25770 // AT1G54780 // AT1G14345 // AT1G10830 // AT4G20360 // AT3G10720 // AT1G01080 // AT5G02130 // AT5G18660 // AT5G43750 // AT5G45…	NA
GO:0051649	P	establishment of localization in cell	48	454	1554	28397	1.6e-05	0.00035	// AT3G54660 // AT4G32260 // AT1G72750 // AT3G54640 // AT3G51820 // AT1G53230 // AT2G20760 // AT5G49910 // AT3G52150 // AT5G45550 // AT1G30210 // AT5G19590 // AT5G42050 // AT3G18680 // AT1G47200 // AT1G20110 // AT5G57180 // AT4G34150 // AT3G07100 // AT5G14740 // AT1G61740 // AT4G38550 // AT1G04790 // AT4G20830 // AT4G14220 // AT1G75460 // AT2G40060 // AT2G25970 // AT1G06950 // AT2G24820 // AT3G01…	Exist
GO:0006779	P	porphyrin biosynthetic process	12	454	157	28397	1.6e-05	0.00036	// AT1G63970 // AT3G61870 // AT2G41680 // AT1G76450 // AT5G18660 // AT3G17210 // AT3G26060 // AT3G51820 // AT1G54780 // AT3G23700 // AT1G32990 // AT5G08280	Exist
GO:0009072	P	aromatic amino acid family metabolic process	15	454	245	28397	1.8e-05	0.0004	// AT3G18680 // AT1G15710 // AT4G36390 // AT5G18660 // AT5G66120 // AT4G23600 // AT3G54640 // AT3G51820 // AT5G19240 // AT5G01750 // AT3G13110 // AT3G10670 // AT1G63970 // AT5G08280 // AT1G24100	NA
GO:0048481	P	ovule development	12	454	159	28397	1.8e-05	0.00041	// AT3G18680 // AT3G54660 // AT3G19170 // AT3G12780 // AT3G44880 // AT1G53230 // AT3G10670 // AT1G30210 // AT1G75080 // AT1G75330 // AT3G52380 // AT4G32551	NA
GO:0033014	P	tetrapyrrole biosynthetic process	12	454	160	28397	2e-05	0.00043	// AT1G63970 // AT3G61870 // AT2G41680 // AT1G76450 // AT5G18660 // AT3G17210 // AT3G26060 // AT3G51820 // AT1G54780 // AT3G23700 // AT1G32990 // AT5G08280	Exist
GO:0044255	P	cellular lipid metabolic process	44	454	1395	28397	2.2e-05	0.00049	// AT1G10960 // AT3G12780 // AT2G22230 // AT2G41680 // AT3G56040 // AT3G51820 // AT5G18660 // AT5G43280 // AT1G68590 // AT3G52150 // AT1G67730 // AT1G32990 // AT5G19590 // AT4G24620 // AT3G61870 // AT4G05160 // AT5G50250 // AT3G17210 // AT3G25770 // AT1G54780 // AT1G14345 // AT1G10830 // AT4G20360 // AT1G01080 // AT5G02130 // AT5G43750 // AT5G45390 // AT3G23700 // AT1G63970 // AT5G43760 // AT5G16…	Exist
GO:0044260	P	cellular macromolecule metabolic process	179	454	8616	28397	2.7e-05	0.0006	// AT1G33240 // AT5G05200 // AT5G36120 // AT2G22230 // AT1G75690 // AT2G41680 // AT3G62120 // AT3G51820 // AT4G39960 // AT1G67840 // AT1G76880 // AT1G30210 // AT4G24620 // AT4G36870 // AT3G18680 // AT5G57180 // AT1G62850 // AT5G50250 // AT2G47730 // AT2G43090 // AT1G54780 // AT5G62220 // AT4G09040 // AT4G25890 // AT2G02070 // AT5G35100 // AT1G13060 // AT1G48210 // AT3G44880 // AT2G01290 // AT1G69…	NA
GO:0009653	P	anatomical structure morphogenesis	52	454	1783	28397	3.1e-05	0.00066	// AT1G33240 // AT1G21880 // AT1G53230 // AT5G36120 // AT2G22230 // AT4G23600 // AT3G51820 // AT3G04760 // AT5G18660 // AT3G60630 // AT5G42070 // AT1G68590 // AT5G45550 // AT1G30210 // AT3G54920 // AT4G36870 // AT4G32551 // AT5G25060 // AT3G20680 // AT1G54500 // AT1G58080 // AT5G08410 // AT5G28500 // AT1G31130 // AT5G65930 // AT4G24930 // AT1G21310 // AT2G02070 // AT3G24770 // AT1G65060 // AT1G01…	NA
GO:0006139	P	nucleobase, nucleoside, nucleotide and nucleic acid metabolic process	111	454	4798	28397	3.1e-05	0.00068	// AT1G33240 // AT5G36120 // AT1G75690 // AT3G62120 // AT3G51820 // AT1G67840 // AT1G76880 // AT1G30210 // AT4G36870 // AT3G18680 // AT4G00895 // AT5G57180 // AT5G50250 // AT1G54780 // AT5G47210 // AT4G09040 // AT3G20810 // AT2G02070 // AT3G07430 // AT3G44880 // AT2G01290 // AT1G69690 // AT3G23940 // AT2G47590 // AT1G20340 // AT1G19350 // AT3G10670 // AT5G28500 // AT1G60590 // AT5G14040 // AT5G08…	NA
GO:0009814	P	defense response, incompatible interaction	23	454	536	28397	3.2e-05	0.00069	// AT1G53230 // AT3G12780 // AT2G22230 // AT3G54640 // AT1G30210 // AT3G54920 // AT5G42050 // AT2G37220 // AT5G50250 // AT4G32260 // AT5G14740 // AT1G31130 // AT4G38550 // AT4G14220 // AT1G75460 // AT3G44880 // AT1G32060 // AT3G01500 // AT2G25110 // AT5G06290 // AT5G52810 // AT1G69690 // AT5G08280	NA
GO:0044042	P	glucan metabolic process	20	454	432	28397	3.8e-05	0.00082	// AT3G46970 // AT2G35960 // AT3G51510 // AT5G28500 // AT3G22960 // AT5G36120 // AT2G22230 // AT5G06700 // AT5G10430 // AT1G76450 // AT5G58330 // AT5G50250 // AT2G47590 // AT3G29320 // AT5G62220 // AT5G12860 // AT3G12780 // AT4G24620 // AT2G41680 // AT5G05200	NA
GO:0007275	P	multicellular organismal development	93	454	3864	28397	4e-05	0.00086	// AT1G33240 // AT3G54660 // AT5G36120 // AT2G22230 // AT3G51820 // AT3G04760 // AT1G67840 // AT1G30210 // AT4G24620 // AT4G36870 // AT3G18680 // AT4G14510 // AT4G20360 // AT2G02070 // AT3G07430 // AT3G44880 // AT2G01290 // AT1G69690 // AT3G23940 // AT4G34200 // AT1G20340 // AT3G56900 // AT5G46290 // AT3G10670 // AT5G28500 // AT5G54310 // AT5G08280 // AT1G24100 // AT1G53230 // AT2G05920 // AT1G60…	NA
GO:0009409	P	response to cold	25	454	629	28397	4.9e-05	0.001	// AT3G53460 // AT3G12780 // AT4G32260 // AT2G40070 // AT3G47520 // AT2G37220 // AT4G34150 // AT5G42050 // AT5G50250 // AT5G14740 // AT2G47730 // AT3G25770 // AT1G32060 // AT3G01500 // AT1G53240 // AT2G33800 // AT3G23700 // AT5G06290 // AT5G43760 // AT1G77490 // AT4G04020 // AT3G29320 // AT5G46290 // AT2G03440 // AT5G08280	Exist
GO:0009266	P	response to temperature stimulus	33	454	962	28397	5.4e-05	0.0011	// AT3G53460 // AT3G12780 // AT4G32260 // AT2G40070 // AT3G47520 // AT5G62350 // AT4G39960 // AT5G49910 // AT2G37220 // AT4G34150 // AT5G42050 // AT5G50250 // AT5G14740 // AT3G17210 // AT2G47730 // AT2G43090 // AT3G25770 // AT1G32060 // AT3G01500 // AT1G53240 // AT2G25110 // AT2G33800 // AT3G23700 // AT5G06290 // AT5G43760 // AT1G77490 // AT2G05710 // AT4G04020 // AT3G29320 // AT5G46290 // AT2G03…	Exist
GO:0000165	P	MAPKKK cascade	13	454	209	28397	5.6e-05	0.0012	// AT4G14220 // AT1G53230 // AT1G75460 // AT4G32260 // AT3G54640 // AT1G32060 // AT3G01500 // AT5G14740 // AT1G31130 // AT1G69690 // AT1G30210 // AT5G42050 // AT5G06290	NA
GO:0000023	P	maltose metabolic process	11	454	152	28397	5.8e-05	0.0012	// AT2G35960 // AT3G51510 // AT5G28500 // AT5G05200 // AT5G36120 // AT2G47590 // AT1G76450 // AT5G58330 // AT5G50250 // AT3G12780 // AT4G24620	NA
GO:0032501	P	multicellular organismal process	95	454	4020	28397	6.5e-05	0.0013	// AT1G33240 // AT3G54660 // AT5G36120 // AT2G22230 // AT3G51820 // AT3G04760 // AT1G67840 // AT1G30210 // AT4G24620 // AT4G36870 // AT3G18680 // AT4G14510 // AT4G20360 // AT2G02070 // AT3G07430 // AT3G44880 // AT2G01290 // AT1G69690 // AT3G23940 // AT1G04300 // AT4G34200 // AT1G20340 // AT3G56900 // AT5G46290 // AT3G10670 // AT5G28500 // AT5G54310 // AT5G08280 // AT1G24100 // AT1G53230 // AT2G05…	NA
GO:0044267	P	cellular protein metabolic process	109	454	4775	28397	6.6e-05	0.0014	// AT3G12780 // AT1G75690 // AT3G62120 // AT4G39960 // AT1G67840 // AT1G30210 // AT5G42050 // AT1G62850 // AT2G47730 // AT1G54780 // AT4G20360 // AT1G07110 // AT2G02070 // AT5G35100 // AT1G13060 // AT1G48210 // AT1G69690 // AT1G41880 // AT1G26150 // AT5G38560 // AT1G20340 // AT2G25760 // AT3G56900 // AT3G10670 // AT5G54310 // AT5G08280 // AT4G23800 // AT1G53230 // AT4G32260 // AT2G05710 // AT4G33…	Exist
[truncated: 124 more rows]

## Sheet: Ler vs F1CL DMG
GO_acc	term_type	Term	queryitem	querytotal	bgitem	bgtotal	pvalue	FDR	entries	col_ler
[truncated: 422 more rows]

## Sheet: Ler vs F1LC DMG
GO_acc	term_type	Term	queryitem	querytotal	bgitem	bgtotal	pvalue	FDR	entries	col_ler
[truncated: 553 more rows]

[truncated: 10 more sheets: Col-0 vs Ler nonDEG-DMG, Col-0 vs F1CL nonDEG-DMG, Col-0 vs F1LC nonDEG-DMG, Ler vs F1CL nonDEG-DMG, Ler vs F1LC nonDEG-DMG, Col-0 vs Ler DEG-nonDMG, Col-0 vs F1CL DEG-nonDMG, Col-0 vs F1LC DEG-nonDMG, Ler vs F1CL DEG-nonDMG, Ler vs F1LC DEG-nonDMG]
