# Supplementary material for: Transcriptome-Wide Analysis of RNA m6A Methylation and Gene Expression Changes Among Two Arabidopsis Ecotypes and Their Reciprocal Hybrids
Source: Front Plant Sci. 2021 Jun 10;12:685189. doi: 10.3389/fpls.2021.685189 (PMC8222996; doi:10.3389/fpls.2021.685189)
Supplement: Supplementary Table 5 — Shared GO terms of any two samples. [file Table_5.XLSX]

## Sheet: Sheet1
Comparisons	Col-0 vs Ler	Col-0 vs F1CL	Col-0 vs F1LC	Ler vs F1CL	Ler vs F1LC
Col-0 vs Ler	462	160	158	262	294
Col-0 vs F1CL		319	267	231	251
Col-0 vs F1LC			341	227	255
Ler vs F1CL				422	395
Ler vs F1LC					553
