# Supplementary material for: Transcriptome-Wide Analysis of RNA m6A Methylation and Gene Expression Changes Among Two Arabidopsis Ecotypes and Their Reciprocal Hybrids
Source: Front Plant Sci. 2021 Jun 10;12:685189. doi: 10.3389/fpls.2021.685189 (PMC8222996; doi:10.3389/fpls.2021.685189)
Supplement: Supplementary Table 6 — Genes related to growth vigor. [file Table_6.XLSX]

## Sheet: Sheet1
Gene	Reference	Journal
AT3G46970	Arabidopsis cytosolic alpha-glycan phosphorylase, PHS2, is important during carbohydrate imbalanced conditions	Plant Biol
AT3G29320	Starch Synthase 4 and Plastidal Phosphorylase Differentially Affect Starch Granule Number and Morphology1	Plant Physiol
	Double Knockout Mutants of Arabidopsis Grown under Normal Conditions Reveal that the Plastidial Phosphorylase Isozyme Participates in Transitory Starch Metabolism	Plant Physiol
AT3G55800	Simultaneous stimulation of sedoheptulose 1,7-bisphosphatase, fructose 1,6-bisphophate aldolase and the photorespiratory glycine decarboxylase-H protein increases CO2 assimilation, vegetative biomass and seed yield in Arabidopsis	Plant Biotechnol J
	Carbonylation and loss-of-function analyses of SBPase reveal its metabolic interface role in oxidative stress, carbon assimilation, and multiple aspects of growth and development in Arabidopsis	Mol Plant
AT4G24620	Loss of cytosolic phosphoglucose isomerase affects carbohydrate metabolism in leaves and is essential for fertility of Arabidopsis	Plant Physiol
	Plastidial Phosphoglucose Isomerase Is an Important Determinant of Seed Yield through Its Involvement in Gibberellin-Mediated Reproductive Development and Storage Reserve Biosynthesis in Arabidopsis	Plant Cell
	Arabidopsis Responds to Alternaria alternata Volatiles by Triggering Plastid Phosphoglucose Isomerase-Independent Mechanisms	Plant Physiol
AT4G09010	The APX4 locus regulates seed vigor and seedling growth in Arabidopsis thaliana	Planta
AT1G02560	Downregulation of ClpR2 Leads to Reduced Accumulation of the ClpPRS Protease Complex and Defects in Chloroplast Biogenesis in Arabidopsis	Plant Cell
AT1G56500	Endogenous Arabidopsis messenger RNAs transported to distant tissues	Nature Plants
	A thioredoxin-like/beta-propeller protein maintains the efficiency of light harvesting in Arabidopsis	Proc Natl Acad Sci U S A
AT2G26900	Seed-Specific Overexpression of the Pyruvate Transporter BASS2 Increases Oil Content in Arabidopsis Seeds--seed biomass	Front Plant Sci
	Decreased capacity for sodium export out of Arabidopsis chloroplasts impairs salt tolerance, photosynthesis and plant performance	Plant J
AT2G36390	Mutants of Arabidopsis Lacking Starch Branching Enzyme II Substitute Plastidial Starch Synthesis by Cytoplasmic Maltose Accumulation	Plant Cell
AT2G40840	A cytosolic glucosyltransferase is required for conversion of starch to sucrose in Arabidopsis leaves at night	Plant J
AT2G41680	Two chloroplast thioredoxin systems differentially modulate photosynthesis in Arabidopsis depending on light intensity and leaf age	Plant J
	Overexpression of chloroplast NADPH-dependent thioredoxin reductase in Arabidopsis enhances leaf growth and elucidates in vivo function of reductase and thioredoxin domains	Front Plant Sci
AT3G01510	A Putative Phosphatase, LSF1, Is Required for Normal Starch Turnover in Arabidopsis Leaves	Plant Physiol
AT3G12780knock-down mutant displayed reduced growth, lower photosynthetic capacity and starch content	Phosphoglycerate kinases are co-regulated to adjust metabolism and to optimize growth	Plant Physiol
AT3G52180	A redox-regulated chloroplast protein phosphatase binds to starch diurnally and functions in its accumulation	Proc Natl Acad Sci U S A
AT3G52750	Slightly smaller than wild type with pale petioles	Description of mutant
AT4G09020	Evidence for distinct mechanisms of starch granule breakdown in plants	J Biol Chem
AT4G10300	The Impacts of TRR14-Overexpression on Arabidopsis thaliana Growth and Photosynthetic Parameters	Iran J Biotechnol
AT5G03650	Impaired sucrose induction1 encodes a conserved plant-specific protein that couples carbohydrate availability to gene expression and plant growth.	Plant J
AT5G51820	Phytotyping4D: a light‐field imaging system for non‐invasive and accurate monitoring of spatio‐temporal plant growth	Plant J
	Elevated CO2-induced changes in mesophyll conductance and anatomical traits in wild type and carbohydrate-metabolism mutants of Arabidopsis	J Exp Bot
AT5G55220	The Role of Plastidic Trigger Factor Serving Protein Biogenesis in Green Algae and Land Plants	Plant Physiol
