# Supplementary material for: Transcriptome-Wide Analysis of RNA m6A Methylation and Gene Expression Changes Among Two Arabidopsis Ecotypes and Their Reciprocal Hybrids
Source: Front Plant Sci. 2021 Jun 10;12:685189. doi: 10.3389/fpls.2021.685189 (PMC8222996; doi:10.3389/fpls.2021.685189)
Supplement: Supplementary Table 7 — m6A methylation of starch biosynthetic process and circadian rhythm-related genes. [file Table_7.XLSX]

## Sheet: Sheet1
Genes of starch biosynthetic process have been reported to associate with biomass vigor
gene	name	col_ler	col_cl	col_lc	ler_cl	ler_lc	cl_lc
AT1G02560	CLPP5	nondeg-nondmg	nondeg-nondmg	nondeg-nondmg	nondeg-nondmg	nondeg-dmg	nondeg-nondmg
AT1G56500	SOQ1	deg-dmg	nondeg-nondmg	nondeg-nondmg	deg-dmg	deg-dmg	nondeg-nondmg
AT2G26900	BASS2	deg-dmg	nondeg-nondmg	deg-nondmg	deg-nondmg	deg-dmg	deg-nondmg
AT2G36390	SBE2.1	deg-dmg	nondeg-nondmg	deg-nondmg	deg-dmg	nondeg-dmg	nondeg-nondmg
AT2G40840	DPE2	deg-dmg	nondeg-nondmg	nondeg-nondmg	deg-dmg	deg-dmg	nondeg-nondmg
AT2G41680	NTRC	deg-dmg	nondeg-nondmg	nondeg-dmg	deg-nondmg	deg-nondmg	nondeg-nondmg
AT3G01510	LSF1	deg-nondmg	deg-nondmg	deg-nondmg	deg-dmg	deg-dmg	nondeg-nondmg
AT3G12780	PGK1	nondeg-dmg	nondeg-nondmg	deg-dmg	nondeg-nondmg	deg-nondmg	deg-nondmg
AT3G29320	PHS1	deg-dmg	nondeg-dmg	deg-dmg	deg-dmg	deg-dmg	deg-nondmg
AT3G46970	PHS2	deg-nondmg	nondeg-dmg	deg-dmg	deg-nondmg	deg-nondmg	deg-nondmg
AT3G52180	SEX4	nondeg-nondmg	nondeg-nondmg	nondeg-nondmg	nondeg-nondmg	nondeg-dmg	nondeg-nondmg
AT3G52750	FTSZ2-2	deg-dmg	nondeg-nondmg	deg-nondmg	deg-dmg	deg-dmg	nondeg-nondmg
AT3G55800	SBPASE	deg-nondmg	nondeg-dmg	deg-nondmg	deg-nondmg	deg-nondmg	deg-nondmg
AT4G09010	APX4	deg-dmg	nondeg-dmg	deg-nondmg	deg-dmg	deg-dmg	deg-nondmg
AT4G09020	ISA3	nondeg-dmg	nondeg-nondmg	nondeg-nondmg	nondeg-dmg	nondeg-dmg	nondeg-nondmg
AT4G10300	TRR14	deg-nondmg	nondeg-nondmg	nondeg-nondmg	deg-nondmg	deg-dmg	nondeg-nondmg
AT4G24620	PGI1	nondeg-dmg	nondeg-dmg	nondeg-dmg	nondeg-nondmg	deg-nondmg	nondeg-nondmg
AT5G03650	SBE2.2	nondeg-nondmg	nondeg-nondmg	nondeg-nondmg	nondeg-nondmg	deg-dmg	deg-nondmg
AT5G51820	PGM1	deg-nondmg	deg-nondmg	deg-nondmg	nondeg-nondmg	deg-dmg	nondeg-nondmg
AT5G55220	TIG1	nondeg-nondmg	nondeg-nondmg	deg-nondmg	deg-nondmg	deg-dmg	deg-nondmg
		*deg-dmg: differentially expressed genes with differentially m6A peaks
Genes of circadian rhythm related to heterosis
gene	name	col_ler	col_cl	col_lc	ler_cl	ler_lc	cl_lc
AT1G01060	LHY	nondeg-nondmg	nondeg-nondmg	nondeg-nondmg	nondeg-nondmg	nondeg-nondmg	nondeg-nondmg
AT1G04400	CRY2	deg-nondmg	nondeg-nondmg	deg-nondmg	deg-nondmg	deg-nondmg	nondeg-nondmg
AT1G22770	GI	deg-nondmg	deg-nondmg	deg-nondmg	deg-nondmg	deg-nondmg	deg-nondmg
AT2G46830	CCA1	nondeg-nondmg	nondeg-nondmg	nondeg-nondmg	nondeg-nondmg	nondeg-nondmg	nondeg-nondmg
AT5G61380	TOC1	deg-dmg	deg-nondmg	deg-nondmg	deg-nondmg	deg-nondmg	deg-nondmg
		*deg-dmg: differentially expressed genes with differentially m6A peaks
